# Supplementary material
Source: Research Square preprint supplement (doi:10.21203/rs.3.rs-9917999/v1)
Supplement: Supplementary file 1 [file 011db22c298144ddf76ac3ff.xlsx]

## Sheet: Table S10.1
Table S10.1 Promoters detected in KCs
promoterId	ENSEMBL	Gene.name	seqnames	start	strand	internalPromoter	promoterPosition	txId	SK.mean	SK.gene.mean	WK.mean	WK.gene.mean	SK.class	WK.class	SK2.apa.mean	SK3.apa.mean	SK4.apa.mean	SK5.apa.mean	WK1.apa.mean	WK2.apa.mean	WK3.apa.mean	WK4.apa.mean	WK5.apa.mean	SK2.gene.mean	SK3.gene.mean	SK4.gene.mean	SK5.gene.mean	WK1.gene.mean	WK2.gene.mean	WK3.gene.mean	WK4.gene.mean	WK5.gene.mean	apa.logFC	apa.AveExpr	apa.t	apa.P.Value	apa.adj.P.Val	apa.B	Sig_p0.05_FC1	SwitchState	PromoterState
1	ENSG00000000457	SCYL3	chr1	169893926	-	FALSE	1	KC-PB.358.1	5.62413	5.62413	4.51013	4.51013	Major	Major	6.42234	5.06307	5.37374	5.63736	4.79527	4.67118	4.72727	4.48966	3.86726	6.42234	5.06307	5.37374	5.63736	4.79527	4.67118	4.72727	4.48966	3.86726	-1.114	5.00524	-3.63794	0.00615081	0.0554978	-2.39314	NonSig	NonSwitched	Single-promoter
2	ENSG00000001084	GCLC	chr6	53545101	-	FALSE	1	KC-PB.3757.1	5.81882	5.81882	5.58142	5.58142	Major	Major	5.52633	6.2858	5.4094	6.05377	5.29885	5.42866	5.87065	5.56579	5.74313	5.52633	6.2858	5.4094	6.05377	5.29885	5.42866	5.87065	5.56579	5.74313	-0.237408	5.68693	-1.0802	0.310276	0.534414	-6.12766	NonSig	NonSwitched	Single-promoter
3	ENSG00000001461	NIPAL3	chr1	24415807	+	FALSE	1	KC-PB.63.1	3.19235	3.19235	3.92314	3.92314	Major	Major	3.03811	4.01806	3.95653	1.75672	4.16608	3.45209	3.81464	3.79489	4.38799	3.03811	4.01806	3.95653	1.75672	4.16608	3.45209	3.81464	3.79489	4.38799	0.730782	3.59834	1.56732	0.154116	0.35393	-5.54364	NonSig	NonSwitched	Single-promoter
4	ENSG00000001630	CYP51A1	chr7	92129029	-	TRUE	3	KC-PB.3990.4	6.59188	13.3791	6.68974	14.9048	NA	NA	6.62045	7.00779	6.82082	5.91843	6.2126	6.72515	6.82539	6.93154	6.75403	11.6051	14.6246	12.082	15.205	14.3077	14.041	15.9272	15.1287	15.1192	0.0978636	6.64625	0.39372	0.703656	0.849072	-6.64526	NonSig	NonSwitched	Multi-promoter
5	ENSG00000001630	CYP51A1	chr7	92134471	-	FALSE	2	KC-PB.3990.1,KC-PB.3990.2	5.50049	13.3791	5.43745	14.9048	Minor	Minor	4.9846	6.01896	5.26116	5.73726	5.64593	5.2945	5.85445	5.0716	5.32078	11.6051	14.6246	12.082	15.205	14.3077	14.041	15.9272	15.1287	15.1192	-0.0630441	5.46547	-0.248915	0.809443	0.912268	-6.69597	NonSig	NonSwitched	Multi-promoter
6	ENSG00000001630	CYP51A1	chr7	92134770	-	FALSE	1	KC-PB.3990.3	1.28678	13.3791	2.77758	14.9048	Minor	Minor	0	1.59783	0	3.54927	2.44918	2.02139	3.24733	3.1256	3.04437	11.6051	14.6246	12.082	15.205	14.3077	14.041	15.9272	15.1287	15.1192	1.4908	2.115	2.05337	0.0726673	0.231852	-4.85206	NonSig	NonSwitched	Multi-promoter
7	ENSG00000001631	KRIT1	chr7	92245893	-	FALSE	1	KC-PB.3991.2	0	0	0	0	Inactive	Inactive	0	0	0	0	0	0	0	0	0	0	0	0	0	0	0	0	0	0	0	0	0	1	1	-6.73005	NonSig	NonSwitched	Single-promoter
8	ENSG00000002834	LASP1	chr17	38870058	+	FALSE	1	KC-PB.1939.2,KC-PB.1939.3	7.23727	7.23727	7.29292	7.29292	Major	Major	7.10924	7.27652	7.52043	7.04287	7.30405	7.39679	7.09736	7.20776	7.45864	7.10924	7.27652	7.52043	7.04287	7.30405	7.39679	7.09736	7.20776	7.45864	0.0556545	7.26819	0.390898	0.705663	0.850672	-6.64646	NonSig	NonSwitched	Single-promoter
9	ENSG00000003056	M6PR	chr12	8949658	-	FALSE	1	KC-PB.980.1,KC-PB.980.2,KC-PB.980.3,KC-PB.980.4	5.79022	5.79022	5.60079	5.60079	Major	Major	6.00279	4.87658	6.20213	6.07937	6.1231	5.82884	5.48502	5.45719	5.10981	6.00279	4.87658	6.20213	6.07937	6.1231	5.82884	5.48502	5.45719	5.10981	-0.189427	5.68498	-0.593503	0.568577	0.746967	-6.53962	NonSig	NonSwitched	Single-promoter
10	ENSG00000003147	ICA1	chr7	8262555	-	FALSE	1	KC-PB.3911.1	0.510005	0.510005	1.4956	1.4956	Major	Major	0	0	2.04002	0	0.920075	2.48275	3.14445	0	0.930726	0	0	2.04002	0	0.920075	2.48275	3.14445	0	0.930726	0.985596	1.05756	1.35188	0.211908	0.429739	-5.81902	NonSig	NonSwitched	Single-promoter
11	ENSG00000003393	ALS2	chr2	201780925	-	FALSE	1	KC-PB.2596.1,KC-PB.2596.2	3.25038	3.25038	3.02405	3.02405	Major	Major	4.107	3.01687	2.853	3.02465	3.17471	2.48275	3.03368	3.38474	3.04437	4.107	3.01687	2.853	3.02465	3.17471	2.48275	3.03368	3.38474	3.04437	-0.226329	3.12464	-0.770641	0.462176	0.665736	-6.41347	NonSig	NonSwitched	Single-promoter
12	ENSG00000003509	NDUFAF7	chr2	37231679	+	FALSE	1	KC-PB.2367.1	3.08171	3.08171	3.32438	3.32438	Major	Major	2.20385	3.82525	2.36458	3.93316	3.43488	2.97901	2.63885	4.11387	3.45531	2.20385	3.82525	2.36458	3.93316	3.43488	2.97901	2.63885	4.11387	3.45531	0.242671	3.21653	0.525115	0.613165	0.783914	-6.58031	NonSig	NonSwitched	Single-promoter
13	ENSG00000003756	RBM5	chr3	50088925	+	FALSE	1	KC-PB.3002.1,KC-PB.3002.2	5.51455	5.51455	5.10534	5.10534	Major	Major	5.34617	5.26668	5.44419	6.00115	4.64903	5.08288	4.69123	5.84975	5.25382	5.34617	5.26668	5.44419	6.00115	4.64903	5.08288	4.69123	5.84975	5.25382	-0.409206	5.28721	-1.46647	0.17916	0.386242	-5.67551	NonSig	NonSwitched	Single-promoter
14	ENSG00000004455	AK2	chr1	33036894	-	FALSE	1	KC-PB.102.1,KC-PB.102.2	5.88372	5.88372	6.17794	6.17794	Major	Major	6.08174	5.92583	5.66676	5.86053	6.3919	6.27601	6.23848	5.95334	6.02995	6.08174	5.92583	5.66676	5.86053	6.3919	6.27601	6.23848	5.95334	6.02995	0.294217	6.04717	2.06585	0.0712512	0.229437	-4.83338	NonSig	NonSwitched	Single-promoter
15	ENSG00000004487	KDM1A	chr1	23019468	+	FALSE	1	KC-PB.55.1,KC-PB.55.2	5.40002	5.40002	5.39814	5.39814	Major	Major	6.5106	5.41112	5.63699	4.04136	5.39375	5.26611	5.37572	5.5394	5.41572	6.5106	5.41112	5.63699	4.04136	5.39375	5.26611	5.37572	5.5394	5.41572	-0.00187851	5.39897	-0.00443321	0.996567	1	-6.73003	NonSig	NonSwitched	Single-promoter
16	ENSG00000004534	RBM6	chr3	49940130	+	FALSE	1	KC-PB.3001.1	3.83575	3.83575	2.89523	2.89523	Major	Major	4.50096	3.82525	4.22014	2.79664	2.44918	2.83177	2.47892	3.26098	3.45531	4.50096	3.82525	4.22014	2.79664	2.44918	2.83177	2.47892	3.26098	3.45531	-0.940515	3.31324	-2.48809	0.0364689	0.155269	-4.18528	NonSig	NonSwitched	Single-promoter
17	ENSG00000004660	CAMKK1	chr17	3892995	-	FALSE	1	KC-PB.1862.1	2.55395	2.55395	2.32003	2.32003	Major	Major	3.56331	2.60103	1.0268	3.02465	2.44918	2.66779	1.20607	2.80951	2.46759	3.56331	2.60103	1.0268	3.02465	2.44918	2.66779	1.20607	2.80951	2.46759	-0.23392	2.42399	-0.434686	0.674812	0.831354	-6.62691	NonSig	NonSwitched	Single-promoter
18	ENSG00000004700	RECQL	chr12	21501635	-	TRUE	1	KC-PB.990.3,KC-PB.990.1,KC-PB.990.4,KC-PB.990.5,KC-PB.990.6,KC-PB.990.10,KC-PB.990.11,KC-PB.990.8,KC-PB.990.12,KC-PB.990.13	5.8692	5.8692	5.73136	5.73136	NA	NA	6.19262	6.37658	5.80704	5.10055	5.01022	5.72835	5.83806	5.82811	6.25205	6.19262	6.37658	5.80704	5.10055	5.01022	5.72835	5.83806	5.82811	6.25205	-0.137841	5.79262	-0.427873	0.679571	0.834499	-6.63008	NonSig	NonSwitched	Single-promoter
19	ENSG00000004766	VPS50	chr7	93232366	+	FALSE	1	KC-PB.3996.1,KC-PB.3996.2	4.61086	4.61086	4.09275	4.09275	Major	Major	3.94751	5.2282	4.63591	4.63185	4.36658	4.15612	3.43338	4.2503	4.25737	3.94751	5.2282	4.63591	4.63185	4.36658	4.15612	3.43338	4.2503	4.25737	-0.518115	4.32302	-1.79564	0.108733	0.291075	-5.22874	NonSig	NonSwitched	Single-promoter
20	ENSG00000004864	SLC25A13	chr7	96322125	-	FALSE	1	KC-PB.3999.1,KC-PB.3999.2,KC-PB.3999.3	4.89454	4.89454	4.5662	4.5662	Major	Major	4.81009	5.30417	4.04986	5.41405	4.88513	4.75531	4.27047	4.59593	4.32416	4.81009	5.30417	4.04986	5.41405	4.88513	4.75531	4.27047	4.59593	4.32416	-0.328343	4.71213	-1.11827	0.294605	0.519286	-6.08739	NonSig	NonSwitched	Single-promoter
21	ENSG00000004897	CDC27	chr17	47189295	-	FALSE	1	KC-PB.1983.1,KC-PB.1983.2	4.17327	4.17327	4.49187	4.49187	Major	Major	4.81009	3.92487	3.63373	4.3244	4.36658	5.11508	4.00283	4.78752	4.18733	4.81009	3.92487	3.63373	4.3244	4.36658	5.11508	4.00283	4.78752	4.18733	0.318598	4.35027	1.034	0.330165	0.551377	-6.17513	NonSig	NonSwitched	Single-promoter
22	ENSG00000004975	DVL2	chr17	7234508	-	FALSE	1	KC-PB.1882.1	4.79011	4.79011	4.59072	4.59072	Major	Major	5.40876	4.47782	4.57441	4.69946	4.42767	4.67118	5.15533	4.2503	4.44913	5.40876	4.47782	4.57441	4.69946	4.42767	4.67118	5.15533	4.2503	4.44913	-0.199392	4.67934	-0.790842	0.450923	0.656711	-6.39726	NonSig	NonSwitched	Single-promoter
23	ENSG00000005020	SKAP2	chr7	26864590	-	FALSE	1	KC-PB.3926.1,KC-PB.3926.3	6.06354	6.06354	5.48769	5.48769	Major	Major	6.29558	6.16874	5.95914	5.83069	5.12533	5.78948	5.68152	5.30883	5.53331	6.29558	6.16874	5.95914	5.83069	5.12533	5.78948	5.68152	5.30883	5.53331	-0.575842	5.74362	-3.25559	0.0109577	0.0766331	-2.98162	NonSig	NonSwitched	Single-promoter
24	ENSG00000005100	DHX33	chr17	5468977	-	FALSE	1	KC-PB.1871.1	1.37766	1.37766	3.21402	3.21402	Major	Major	4.50096	1.00966	0	0	2.6675	3.45209	2.47892	3.60434	3.86726	4.50096	1.00966	0	0	2.6675	3.45209	2.47892	3.60434	3.86726	1.83637	2.39786	2.02068	0.0765077	0.236303	-4.90083	NonSig	NonSwitched	Single-promoter
25	ENSG00000005156	LIG3	chr17	34980509	+	FALSE	1	KC-PB.1929.1,KC-PB.1929.2	4.41538	4.41538	4.70583	4.70583	Major	Major	5.14026	4.47782	3.04658	4.99687	5.01022	4.7956	4.41005	4.6949	4.61836	5.14026	4.47782	3.04658	4.99687	5.01022	4.7956	4.41005	4.6949	4.61836	0.290445	4.57674	0.711193	0.496358	0.688741	-6.45905	NonSig	NonSwitched	Single-promoter
26	ENSG00000005175	RPAP3	chr12	47706021	-	FALSE	1	KC-PB.1031.1,KC-PB.1031.2	3.50692	3.50692	2.95997	2.95997	Major	Major	3.03811	3.71823	4.04986	3.22149	3.54925	3.11259	2.63885	3.60434	1.8948	3.03811	3.71823	4.04986	3.22149	3.54925	3.11259	2.63885	3.60434	1.8948	-0.546955	3.20306	-1.40259	0.196825	0.409907	-5.75639	NonSig	NonSwitched	Single-promoter
27	ENSG00000005469	CROT	chr7	87345677	+	FALSE	1	KC-PB.3985.1	2.59815	2.59815	3.62988	3.62988	Major	Major	3.56331	3.01687	1.62059	2.19185	1.87839	3.88449	3.59815	3.88148	4.90687	3.56331	3.01687	1.62059	2.19185	1.87839	3.88449	3.59815	3.88148	4.90687	1.03172	3.17133	1.65457	0.135041	0.328366	-5.42578	NonSig	NonSwitched	Single-promoter
28	ENSG00000005801	ZNF195	chr11	3379162	-	FALSE	1	KC-PB.726.1,KC-PB.726.2	3.53314	3.53314	3.43049	3.43049	Major	Major	3.32448	4.26618	2.853	3.6889	3.54925	4.09286	3.59815	3.70276	2.20943	3.32448	4.26618	2.853	3.6889	3.54925	4.09286	3.59815	3.70276	2.20943	-0.102651	3.47611	-0.244467	0.812773	0.912637	-6.69717	NonSig	NonSwitched	Single-promoter
29	ENSG00000005812	FBXL3	chr13	77027159	-	FALSE	1	KC-PB.1311.1	5.11953	5.11953	4.39883	4.39883	Major	Major	4.61153	5.77379	5.09593	4.99687	4.54259	3.88449	4.98716	4.54377	4.03615	4.61153	5.77379	5.09593	4.99687	4.54259	3.88449	4.98716	4.54377	4.03615	-0.720698	4.71914	-2.42226	0.0404895	0.166212	-4.28786	NonSig	NonSwitched	Single-promoter
30	ENSG00000005884	ITGA3	chr17	50055973	+	FALSE	1	KC-PB.1987.2,KC-PB.1987.4	6.50951	6.50951	6.69161	6.69161	Major	Major	6.42234	6.35887	6.78055	6.47627	6.48106	6.70413	6.945	6.78197	6.54591	6.42234	6.35887	6.78055	6.47627	6.48106	6.70413	6.945	6.78197	6.54591	0.182106	6.61068	1.24136	0.248228	0.470138	-5.95032	NonSig	NonSwitched	Single-promoter
31	ENSG00000005893	LAMP2	chrX	120469296	-	FALSE	1	KC-PB.4641.1,KC-PB.4641.2,KC-PB.4641.3,KC-PB.4641.4	6.99766	6.99766	7.32577	7.32577	Major	Major	6.92881	7.00779	6.9475	7.10652	6.96599	7.61514	7.30837	7.27329	7.46605	6.92881	7.00779	6.9475	7.10652	6.96599	7.61514	7.30837	7.27329	7.46605	0.328113	7.17994	2.20328	0.0573286	0.204827	-4.62548	NonSig	NonSwitched	Single-promoter
32	ENSG00000006007	GDE1	chr16	19522098	-	FALSE	1	KC-PB.1709.1	7.02729	7.02729	6.44085	6.44085	Major	Major	6.62045	7.13806	6.87284	7.47781	6.34517	6.30421	6.88245	6.14056	6.53185	6.62045	7.13806	6.87284	7.47781	6.34517	6.30421	6.88245	6.14056	6.53185	-0.586444	6.70149	-2.68908	0.0265185	0.130628	-3.87028	NonSig	NonSwitched	Single-promoter
33	ENSG00000006062	MAP3K14	chr17	45317019	-	FALSE	1	KC-PB.1976.1	3.41984	3.41984	3.58581	3.58581	Major	Major	4.25061	3.18706	4.04986	2.19185	3.93314	3.72672	3.34335	3.88148	3.04437	4.25061	3.18706	4.04986	2.19185	3.93314	3.72672	3.34335	3.88148	3.04437	0.165969	3.51205	0.388471	0.70739	0.851311	-6.64749	NonSig	NonSwitched	Single-promoter
34	ENSG00000006118	TMEM132A	chr11	60924460	+	FALSE	1	KC-PB.815.1	1.45411	1.45411	1.99933	1.99933	Major	Major	0	3.18706	2.62936	0	1.47738	2.48275	1.20607	2.62101	2.20943	0	3.18706	2.62936	0	1.47738	2.48275	1.20607	2.62101	2.20943	0.545224	1.75701	0.730366	0.485162	0.68145	-6.4447	NonSig	NonSwitched	Single-promoter
35	ENSG00000006125	AP2B1	chr17	35587283	+	FALSE	1	KC-PB.1931.2,KC-PB.1931.1,KC-PB.1931.3,KC-PB.1931.4,KC-PB.1931.5,KC-PB.1931.6,KC-PB.1931.7	5.27305	5.27305	6.33923	6.33923	Major	Major	5.40876	5.44508	4.63591	5.60246	6.19514	6.58274	5.96423	6.27461	6.67946	5.40876	5.44508	4.63591	5.60246	6.19514	6.58274	5.96423	6.27461	6.67946	1.06618	5.86538	4.46128	0.00189777	0.0318234	-1.1857	UpReg	NonSwitched	Single-promoter
36	ENSG00000006194	ZNF263	chr16	3283444	+	FALSE	1	KC-PB.1681.1,KC-PB.1681.2,KC-PB.1681.3,KC-PB.1681.4	4.97115	4.97115	4.2809	4.2809	Major	Major	4.81009	5.34071	5.4094	4.3244	4.54259	4.09286	4.41005	3.79489	4.56413	4.81009	5.34071	5.4094	4.3244	4.54259	4.09286	4.41005	3.79489	4.56413	-0.690245	4.58768	-2.54336	0.0334055	0.147341	-4.0989	NonSig	NonSwitched	Single-promoter
37	ENSG00000006451	RALA	chr7	39623595	+	FALSE	1	KC-PB.3946.1	7.43638	7.43638	6.71569	6.71569	Major	Major	7.72802	7.53486	7.22268	7.25997	6.68247	7.09163	6.72201	6.55048	6.53185	7.72802	7.53486	7.22268	7.25997	6.68247	7.09163	6.72201	6.55048	6.53185	-0.720693	7.03599	-4.25809	0.00251379	0.0361802	-1.47492	NonSig	NonSwitched	Single-promoter
38	ENSG00000006453	BAIAP2L1	chr7	98401080	-	FALSE	1	KC-PB.4002.1	4.2842	4.2842	3.6833	3.6833	Major	Major	4.61153	4.1056	2.853	5.56669	3.43488	3.54956	3.74602	3.49871	4.18733	4.61153	4.1056	2.853	5.56669	3.43488	3.54956	3.74602	3.49871	4.18733	-0.600905	3.95037	-1.23935	0.248935	0.471227	-5.95265	NonSig	NonSwitched	Single-promoter
39	ENSG00000006530	AGK	chr7	141551410	+	FALSE	1	KC-PB.4084.1	1.9791	1.9791	1.6549	1.6549	Major	Major	2.68046	2.01447	0	3.22149	0.920075	2.97901	1.5659	2.80951	0	2.68046	2.01447	0	3.22149	0.920075	2.97901	1.5659	2.80951	0	-0.324207	1.79899	-0.395182	0.702617	0.848801	-6.64464	NonSig	NonSwitched	Single-promoter
40	ENSG00000006576	PHTF2	chr7	77798857	+	FALSE	1	KC-PB.3978.1	3.23688	3.23688	3.74323	3.74323	Major	Major	4.107	3.82525	1.62059	3.39467	4.30279	3.88449	3.88013	3.60434	3.04437	4.107	3.82525	1.62059	3.39467	4.30279	3.88449	3.88013	3.60434	3.04437	0.506347	3.51818	0.999872	0.345477	0.56512	-6.20917	NonSig	NonSwitched	Single-promoter
41	ENSG00000006695	COX10	chr17	14069510	+	FALSE	1	KC-PB.1899.1	4.59529	4.59529	4.58903	4.58903	Major	Major	5.14026	4.1056	4.57441	4.56091	4.16608	4.8348	4.53732	4.37494	5.03202	5.14026	4.1056	4.57441	4.56091	4.16608	4.8348	4.53732	4.37494	5.03202	-0.00626057	4.59181	-0.0248345	0.980771	1	-6.7297	NonSig	NonSwitched	Single-promoter
42	ENSG00000006715	VPS41	chr7	38909190	-	FALSE	1	KC-PB.3945.1,KC-PB.3945.2	4.8959	4.8959	4.05498	4.05498	Major	Major	5.46874	4.97284	4.51018	4.63185	4.42767	2.66779	4.36501	4.2503	4.56413	5.46874	4.97284	4.51018	4.63185	4.42767	2.66779	4.36501	4.2503	4.56413	-0.840922	4.42872	-2.03548	0.0747448	0.23441	-4.87878	NonSig	NonSwitched	Single-promoter
43	ENSG00000006744	ELAC2	chr17	13017984	-	FALSE	1	KC-PB.1891.1	5.85731	5.85731	5.48273	5.48273	Major	Major	6.08174	5.47826	5.29967	6.56958	5.67141	5.32235	5.58661	5.51251	5.32078	6.08174	5.47826	5.29967	6.56958	5.67141	5.32235	5.58661	5.51251	5.32078	-0.37458	5.64921	-1.43271	0.188315	0.400501	-5.71852	NonSig	NonSwitched	Single-promoter
44	ENSG00000006831	ADIPOR2	chr12	1691021	+	FALSE	1	KC-PB.963.1,KC-PB.963.2,KC-PB.963.3,KC-PB.963.4,KC-PB.963.5	5.94948	5.94948	4.89812	4.89812	Major	Major	6.81787	5.90158	5.37374	5.70472	4.92804	4.94638	4.69123	5.10797	4.81696	6.81787	5.90158	5.37374	5.70472	4.92804	4.94638	4.69123	5.10797	4.81696	-1.05136	5.36539	-3.8258	0.00466371	0.04737	-2.10972	DownReg	NonSwitched	Single-promoter
45	ENSG00000007168	PAFAH1B1	chr17	2593649	+	FALSE	1	KC-PB.1859.1,KC-PB.1859.2,KC-PB.1859.3,KC-PB.1859.4	8.13785	8.13785	7.02634	7.02634	Major	Major	8.5201	8.00787	8.05291	7.97053	7.06544	7.13938	7.19712	6.95169	6.77805	8.5201	8.00787	8.05291	7.97053	7.06544	7.13938	7.19712	6.95169	6.77805	-1.11152	7.52034	-7.01903	8.99578e-05	0.00610623	1.92729	DownReg	NonSwitched	Single-promoter
46	ENSG00000007384	RHBDF1	chr16	72600	-	FALSE	1	KC-PB.1663.1	5.52537	5.52537	4.47011	4.47011	Major	Major	5.34617	5.54241	5.57555	5.63736	4.23606	4.91014	4.16929	4.31397	4.72108	5.34617	5.54241	5.57555	5.63736	4.23606	4.91014	4.16929	4.31397	4.72108	-1.05526	4.93911	-5.72602	0.000377223	0.0120009	0.473595	DownReg	NonSwitched	Single-promoter
47	ENSG00000007923	DNAJC11	chr1	6701814	-	FALSE	1	KC-PB.16.2,KC-PB.16.1	3.92651	3.92651	4.8332	4.8332	Major	Major	3.32448	4.60343	3.21724	4.56091	5.23192	4.38463	4.86306	4.6949	4.9915	3.32448	4.60343	3.21724	4.56091	5.23192	4.38463	4.86306	4.6949	4.9915	0.90669	4.43023	2.58163	0.0314375	0.143503	-4.03895	NonSig	NonSwitched	Single-promoter
48	ENSG00000008130	NADK	chr1	1778432	-	FALSE	1	KC-PB.5.1	3.65074	3.65074	4.213	4.213	Major	Major	4.107	3.82525	2.62936	4.04136	4.36658	4.71386	4.16929	4.04049	3.77476	4.107	3.82525	2.62936	4.04136	4.36658	4.71386	4.16929	4.04049	3.77476	0.562253	3.96311	1.67539	0.13082	0.323135	-5.39718	NonSig	NonSwitched	Single-promoter
49	ENSG00000008256	CYTH3	chr7	6272644	-	FALSE	1	KC-PB.3905.1	4.5823	4.5823	4.14988	4.14988	Major	Major	3.94751	5.148	4.9093	4.3244	4.16608	4.38463	3.88013	4.54377	3.77476	3.94751	5.148	4.9093	4.3244	4.16608	4.38463	3.88013	4.54377	3.77476	-0.432424	4.34206	-1.53253	0.162377	0.364887	-5.58968	NonSig	NonSwitched	Single-promoter
50	ENSG00000008283	CYB561	chr17	63446134	-	FALSE	2	KC-PB.2020.4	2.73116	6.25341	3.01874	5.34913	Minor	Major	3.03811	3.18706	0	4.69946	3.65521	2.83177	3.51811	2.62101	2.46759	7.64964	6.90529	2.36458	8.09413	4.57529	4.85316	6.95149	5.43052	4.93517	0.287581	2.89093	0.344247	0.739174	0.869959	-6.66509	NonSig	NonSwitched	Multi-promoter
51	ENSG00000008283	CYB561	chr17	63446306	-	FALSE	1	KC-PB.2020.1,KC-PB.2020.2,KC-PB.2020.3,KC-PB.2020.5	3.52225	6.25341	2.33039	5.34913	Major	Minor	4.61153	3.71823	2.36458	3.39467	0.920075	2.02139	3.43338	2.80951	2.46759	7.64964	6.90529	2.36458	8.09413	4.57529	4.85316	6.95149	5.43052	4.93517	-1.19186	2.8601	-2.04707	0.0733923	0.232955	-4.86148	NonSig	NonSwitched	Multi-promoter
52	ENSG00000008294	SPAG9	chr17	51120868	-	FALSE	1	KC-PB.1995.1,KC-PB.1995.2	5.91692	5.91692	5.93585	5.93585	Major	Major	5.28074	6.8135	6.24223	5.33121	6.14145	6.18793	6.3467	6.14056	4.86261	5.28074	6.8135	6.24223	5.33121	6.14145	6.18793	6.3467	6.14056	4.86261	0.0189293	5.92744	0.0449981	0.965167	0.998885	-6.72893	NonSig	NonSwitched	Single-promoter
53	ENSG00000008311	AASS	chr7	122144249	-	FALSE	1	KC-PB.4048.1	1.63573	1.63573	2.74915	2.74915	Major	Major	3.32448	1.59783	1.62059	0	2.6675	2.83177	2.29902	3.26098	2.68648	3.32448	1.59783	1.62059	0	2.6675	2.83177	2.29902	3.26098	2.68648	1.11343	2.2543	1.93082	0.0880976	0.256544	-5.03351	NonSig	NonSwitched	Single-promoter
54	ENSG00000008405	CRY1	chr12	107093852	-	FALSE	1	KC-PB.1169.1,KC-PB.1169.2	5.47735	5.47735	4.78957	4.78957	Major	Major	5.87561	5.54241	5.85954	4.63185	4.54259	4.4866	5.78774	4.31397	4.81696	5.87561	5.54241	5.85954	4.63185	4.54259	4.4866	5.78774	4.31397	4.81696	-0.68778	5.09525	-1.85265	0.099528	0.274356	-5.1471	NonSig	NonSwitched	Single-promoter
55	ENSG00000008513	ST3GAL1	chr8	133571915	-	FALSE	1	KC-PB.4272.1	0.650258	0.650258	2.01644	2.01644	Major	Major	0	2.60103	0	0	1.87839	2.02139	2.09346	0.894243	3.19474	0	2.60103	0	0	1.87839	2.02139	2.09346	0.894243	3.19474	1.36619	1.40925	2.09288	0.0682744	0.224737	-4.79279	NonSig	NonSwitched	Single-promoter
56	ENSG00000008838	MED24	chr17	40054408	-	FALSE	1	KC-PB.1944.1,KC-PB.1944.2	4.48478	4.48478	5.10501	5.10501	Major	Major	3.56331	4.71896	5.09593	4.56091	5.56667	5.01625	5.01658	4.74195	5.18361	3.56331	4.71896	5.09593	4.56091	5.56667	5.01625	5.01658	4.74195	5.18361	0.620235	4.82935	1.98745	0.0806113	0.242859	-4.95014	NonSig	NonSwitched	Single-promoter
57	ENSG00000008952	SEC62	chr3	169966790	+	FALSE	1	KC-PB.3160.1,KC-PB.3160.2,KC-PB.3160.3	3.96443	3.96443	5.12345	5.12345	Major	Major	3.76816	4.41067	2.853	4.82587	4.96972	4.75531	5.32957	5.30883	5.25382	3.76816	4.41067	2.853	4.82587	4.96972	4.75531	5.32957	5.30883	5.25382	1.15902	4.60833	3.08123	0.0143394	0.0903558	-3.25393	NonSig	NonSwitched	Single-promoter
58	ENSG00000009307	CSDE1	chr1	114726388	-	TRUE	4	KC-PB.259.7	8.81283	33.7327	8.86704	34.4663	NA	NA	8.50586	9.17404	9.06424	8.50716	8.81022	8.91332	9.01667	8.83585	8.75914	31.8518	34.3255	34.3424	34.4111	34.5732	34.4519	33.8778	34.8138	34.6147	0.0542136	8.84295	0.30712	0.766276	0.88589	-6.67827	NonSig	NonSwitched	Multi-promoter
59	ENSG00000009307	CSDE1	chr1	114730614	-	TRUE	3	KC-PB.259.6,KC-PB.259.19	9.51663	33.7327	9.51269	34.4663	NA	NA	9.17075	9.63946	9.50426	9.75204	9.53611	9.51474	9.51374	9.58613	9.41274	31.8518	34.3255	34.3424	34.4111	34.5732	34.4519	33.8778	34.8138	34.6147	-0.00393326	9.51444	-0.0281373	0.978214	1	-6.72961	NonSig	NonSwitched	Multi-promoter
60	ENSG00000009307	CSDE1	chr1	114736800	-	TRUE	2	KC-PB.259.18	8.96396	33.7327	9.14853	34.4663	NA	NA	8.64884	9.18915	9.09194	8.92592	9.10487	9.10388	8.88924	9.40064	9.24404	31.8518	34.3255	34.3424	34.4111	34.5732	34.4519	33.8778	34.8138	34.6147	0.184571	9.0665	1.16211	0.277342	0.500832	-6.03973	NonSig	NonSwitched	Multi-promoter
61	ENSG00000009307	CSDE1	chr1	114757999	-	FALSE	1	KC-PB.259.1,KC-PB.259.2,KC-PB.259.3,KC-PB.259.5,KC-PB.259.4,KC-PB.259.8,KC-PB.259.9,KC-PB.259.11,KC-PB.259.12,KC-PB.259.13,KC-PB.259.15,KC-PB.259.17,KC-PB.259.14	6.43926	33.7327	6.938	34.4663	Minor	Minor	5.52633	6.3228	6.68195	7.22598	7.12198	6.92	6.45814	6.99117	7.19873	31.8518	34.3255	34.3424	34.4111	34.5732	34.4519	33.8778	34.8138	34.6147	0.498738	6.71634	1.51262	0.167282	0.371397	-5.61577	NonSig	NonSwitched	Multi-promoter
62	ENSG00000009780	FAM76A	chr1	27725971	+	FALSE	1	KC-PB.77.1,KC-PB.77.2	3.09669	3.09669	4.55918	4.55918	Major	Major	3.56331	3.01687	4.04986	1.75672	4.36658	5.1774	5.10142	3.96318	4.18733	3.56331	3.01687	4.04986	1.75672	4.36658	5.1774	5.10142	3.96318	4.18733	1.4625	3.90918	3.04044	0.0152772	0.0934777	-3.31786	NonSig	NonSwitched	Single-promoter
63	ENSG00000009844	VTA1	chr6	142147263	+	FALSE	1	KC-PB.3858.1	6.185	6.185	7.14643	7.14643	Major	Major	6.29558	5.99624	5.72452	6.72367	6.92421	6.99112	7.06956	7.38866	7.35863	6.29558	5.99624	5.72452	6.72367	6.92421	6.99112	7.06956	7.38866	7.35863	0.961433	6.71913	4.39043	0.00209176	0.0334964	-1.28585	NonSig	NonSwitched	Single-promoter
64	ENSG00000010072	SPRTN	chr1	231337980	+	FALSE	1	KC-PB.466.1,KC-PB.466.2,KC-PB.466.3	3.73936	3.73936	3.61867	3.61867	Major	Major	4.38121	4.87658	3.5078	2.19185	3.93314	4.09286	3.03368	3.70276	3.3309	4.38121	4.87658	3.5078	2.19185	3.93314	4.09286	3.03368	3.70276	3.3309	-0.120695	3.67231	-0.230941	0.822922	0.918809	-6.7007	NonSig	NonSwitched	Single-promoter
65	ENSG00000010165	METTL13	chr1	171781682	+	FALSE	1	KC-PB.362.1	4.48003	4.48003	4.29528	4.29528	Major	Major	3.94751	5.26668	4.2983	4.40762	3.43488	4.98174	4.06048	4.74195	4.25737	3.94751	5.26668	4.2983	4.40762	3.43488	4.98174	4.06048	4.74195	4.25737	-0.184744	4.37739	-0.496823	0.632136	0.798457	-6.59578	NonSig	NonSwitched	Single-promoter
66	ENSG00000010244	ZNF207	chr17	32350164	+	FALSE	1	KC-PB.1926.1	7.1239	7.1239	8.00252	8.00252	Major	Major	6.86327	7.35899	7.47067	6.80266	7.88052	7.83407	7.6742	8.33917	8.28466	6.86327	7.35899	7.47067	6.80266	7.88052	7.83407	7.6742	8.33917	8.28466	0.878622	7.61202	4.11189	0.00308884	0.0397855	-1.68673	NonSig	NonSwitched	Single-promoter
67	ENSG00000010292	NCAPD2	chr12	6494001	+	FALSE	1	KC-PB.971.1,KC-PB.971.2,KC-PB.971.3	5.44247	5.44247	5.47139	5.47139	Major	Major	5.68647	5.57344	5.4094	5.10055	5.42405	5.26611	5.44229	5.45719	5.76733	5.68647	5.57344	5.4094	5.10055	5.42405	5.26611	5.44229	5.45719	5.76733	0.0289271	5.45854	0.179087	0.862141	0.938717	-6.71237	NonSig	NonSwitched	Single-promoter
68	ENSG00000010404	IDS	chrX	149505301	-	FALSE	1	KC-PB.4663.1	5.80198	5.80198	4.97406	4.97406	Major	Major	5.78414	5.57344	4.95827	6.89208	4.92804	4.71386	5.12863	4.91617	5.18361	5.78414	5.57344	4.95827	6.89208	4.92804	4.71386	5.12863	4.91617	5.18361	-0.827921	5.34203	-2.37705	0.0435054	0.173582	-4.35806	NonSig	NonSwitched	Single-promoter
69	ENSG00000011007	ELOA	chr1	23743473	+	FALSE	1	KC-PB.59.1	4.71019	4.71019	5.17256	5.17256	Major	Major	4.50096	4.97284	4.80607	4.56091	5.08797	4.6272	5.39825	5.56579	5.18361	4.50096	4.97284	4.80607	4.56091	5.08797	4.6272	5.39825	5.56579	5.18361	0.46237	4.96707	2.21153	0.0565839	0.203188	-4.61289	NonSig	NonSwitched	Single-promoter
70	ENSG00000011028	MRC2	chr17	62627668	+	FALSE	1	KC-PB.2019.1	4.67827	4.67827	3.8905	3.8905	Major	Major	5.14026	4.66235	5.22159	3.6889	4.48627	3.23485	4.49613	4.04049	3.19474	5.14026	4.66235	5.22159	3.6889	4.48627	3.23485	4.49613	4.04049	3.19474	-0.787777	4.24062	-1.86696	0.0973351	0.271208	-5.12644	NonSig	NonSwitched	Single-promoter
71	ENSG00000011105	TSPAN9	chr12	3077379	+	FALSE	1	KC-PB.965.1	4.73972	4.73972	4.48396	4.48396	Major	Major	5.14026	5.30417	4.37244	4.142	4.42767	4.09286	5.01658	4.37494	4.50777	5.14026	5.30417	4.37244	4.142	4.42767	4.09286	5.01658	4.37494	4.50777	-0.255752	4.59763	-0.876329	0.405368	0.615321	-6.32472	NonSig	NonSwitched	Single-promoter
72	ENSG00000011198	ABHD5	chr3	43690878	+	FALSE	1	KC-PB.2969.1,KC-PB.2969.2,KC-PB.2969.3	3.64173	3.64173	3.23221	3.23221	Major	Major	3.03811	4.34023	3.04658	4.142	3.65521	2.83177	3.81464	2.40413	3.45531	3.03811	4.34023	3.04658	4.142	3.65521	2.83177	3.81464	2.40413	3.45531	-0.40952	3.41422	-1.01369	0.339214	0.557515	-6.19549	NonSig	NonSwitched	Single-promoter
73	ENSG00000011275	RNF216	chr7	5781646	-	FALSE	1	KC-PB.3900.1,KC-PB.3900.2	4.11099	4.11099	3.98624	3.98624	Major	Major	4.71422	4.18812	3.21724	4.3244	4.42767	3.88449	3.88013	3.70276	4.03615	4.71422	4.18812	3.21724	4.3244	4.42767	3.88449	3.88013	3.70276	4.03615	-0.124754	4.04169	-0.415785	0.688053	0.839694	-6.63559	NonSig	NonSwitched	Single-promoter
74	ENSG00000011304	PTBP1	chr19	797416	+	FALSE	1	KC-PB.2167.1,KC-PB.2167.2,KC-PB.2167.3	8.42877	8.42877	8.11906	8.11906	Major	Major	8.89825	8.21395	8.28176	8.32113	8.25382	8.04515	8.11267	7.94585	8.23778	8.89825	8.21395	8.28176	8.32113	8.25382	8.04515	8.11267	7.94585	8.23778	-0.309719	8.25671	-1.84313	0.101012	0.276017	-5.16081	NonSig	NonSwitched	Single-promoter
75	ENSG00000011405	PIK3C2A	chr11	17207985	-	FALSE	1	KC-PB.755.1,KC-PB.755.2	4.09068	4.09068	4.76669	4.76669	Major	Major	3.03811	4.18812	4.37244	4.76405	4.79527	4.27489	4.83029	5.21189	4.72108	3.03811	4.18812	4.37244	4.76405	4.79527	4.27489	4.83029	5.21189	4.72108	0.676005	4.46624	1.93936	0.0869276	0.254877	-5.02099	NonSig	NonSwitched	Single-promoter
76	ENSG00000012061	ERCC1	chr19	45423528	-	FALSE	1	KC-PB.2280.1	6.42557	6.42557	6.40985	6.40985	Major	Major	6.64666	6.73332	5.88509	6.4372	6.70732	6.47521	6.6393	6.15801	6.06943	6.64666	6.73332	5.88509	6.4372	6.70732	6.47521	6.6393	6.15801	6.06943	-0.0157148	6.41684	-0.0706828	0.945315	0.988382	-6.72729	NonSig	NonSwitched	Single-promoter
77	ENSG00000012174	MBTPS2	chrX	21839617	+	FALSE	1	KC-PB.4564.1	3.71189	3.71189	3.69715	3.69715	Major	Major	3.03811	3.71823	4.04986	4.04136	3.43488	3.54956	3.94279	3.60434	3.95417	3.03811	3.71823	4.04986	4.04136	3.43488	3.54956	3.94279	3.60434	3.95417	-0.014741	3.7037	-0.0617022	0.952252	0.993326	-6.72794	NonSig	NonSwitched	Single-promoter
78	ENSG00000012211	PRICKLE3	chrX	49186385	-	FALSE	1	KC-PB.4589.1	3.54783	3.54783	3.43113	3.43113	Major	Major	2.20385	2.82388	3.74954	5.41405	3.75393	3.45209	3.51811	2.97619	3.45531	2.20385	2.82388	3.74954	5.41405	3.75393	3.45209	3.51811	2.97619	3.45531	-0.116703	3.48299	-0.199765	0.846447	0.930751	-6.70807	NonSig	NonSwitched	Single-promoter
79	ENSG00000012232	EXTL3	chr8	28701387	+	FALSE	1	KC-PB.4150.1	1.95504	1.95504	3.21444	3.21444	Major	Major	0	3.01687	3.04658	1.75672	3.31065	3.45209	2.91369	2.62101	3.77476	0	3.01687	3.04658	1.75672	3.31065	3.45209	2.91369	2.62101	3.77476	1.2594	2.65471	2.02706	0.0757423	0.235371	-4.89133	NonSig	NonSwitched	Single-promoter
80	ENSG00000013288	MAN2B2	chr4	6575154	+	FALSE	1	KC-PB.3235.1	4.83888	4.83888	4.32666	4.32666	Major	Major	4.89998	4.60343	4.75155	5.10055	4.42767	3.88449	4.95712	4.2503	4.11372	4.89998	4.60343	4.75155	5.10055	4.42767	3.88449	4.95712	4.2503	4.11372	-0.512217	4.55431	-2.26818	0.0517197	0.19132	-4.52612	NonSig	NonSwitched	Single-promoter
81	ENSG00000013374	NUB1	chr7	151341780	+	FALSE	1	KC-PB.4094.1	4.252	4.252	3.83772	3.83772	Major	Major	4.9846	3.92487	3.95653	4.142	3.02462	3.95734	4.11591	3.70276	4.38799	4.9846	3.92487	3.95653	4.142	3.02462	3.95734	4.11591	3.70276	4.38799	-0.414276	4.02185	-1.27011	0.238311	0.462192	-5.91689	NonSig	NonSwitched	Single-promoter
82	ENSG00000013375	PGM3	chr6	83193265	-	FALSE	1	KC-PB.3784.1,KC-PB.3784.2,KC-PB.3784.3	1.09862	1.09862	3.61199	3.61199	Major	Major	0	1.59783	0	2.79664	3.84631	3.11259	3.94279	4.11387	3.04437	0	1.59783	0	2.79664	3.84631	3.11259	3.94279	4.11387	3.04437	2.51337	2.49493	4.18465	0.00278674	0.037762	-1.58093	UpReg	NonSwitched	Single-promoter
83	ENSG00000013441	CLK1	chr2	200864660	-	FALSE	1	KC-PB.2590.1	7.96035	7.96035	8.25096	8.25096	Major	Major	7.74024	7.90182	8.09184	8.10751	8.25382	7.86753	7.54889	8.77211	8.81245	7.74024	7.90182	8.09184	8.10751	8.25382	7.86753	7.54889	8.77211	8.81245	0.290609	8.1218	1.03091	0.331533	0.551814	-6.17826	NonSig	NonSwitched	Single-promoter
84	ENSG00000013523	ANGEL1	chr14	76812890	-	FALSE	1	KC-PB.1474.1	2.88659	2.88659	2.83957	2.83957	Major	Major	3.94751	2.33736	2.04002	3.22149	2.85709	2.27043	2.63885	2.97619	3.45531	3.94751	2.33736	2.04002	3.22149	2.85709	2.27043	2.63885	2.97619	3.45531	-0.0470201	2.86047	-0.113651	0.912201	0.968363	-6.72292	NonSig	NonSwitched	Single-promoter
85	ENSG00000013561	RNF14	chr5	141969105	+	FALSE	1	KC-PB.3615.1,KC-PB.3615.2	3.50859	3.50859	3.99672	3.99672	Major	Major	3.56331	3.92487	3.74954	2.79664	3.54925	3.88449	4.22076	4.37494	3.95417	3.56331	3.92487	3.74954	2.79664	3.54925	3.88449	4.22076	4.37494	3.95417	0.488132	3.77978	1.83998	0.101508	0.276733	-5.16533	NonSig	NonSwitched	Single-promoter
86	ENSG00000013563	DNASE1L1	chrX	154412101	-	FALSE	1	KC-PB.4667.1	1.17612	1.17612	2.26283	2.26283	Major	Major	1.48725	0	3.21724	0	2.44918	0.819616	2.09346	2.62101	3.3309	1.48725	0	3.21724	0	2.44918	0.819616	2.09346	2.62101	3.3309	1.08671	1.77985	1.43737	0.187026	0.398368	-5.71261	NonSig	NonSwitched	Single-promoter
87	ENSG00000013573	DDX11	chr12	31073867	+	FALSE	1	KC-PB.1007.1	2.29687	2.29687	3.16241	3.16241	Major	Major	3.03811	5.01866	0	1.13069	4.30279	3.54956	3.34335	2.14878	2.46759	3.03811	5.01866	0	1.13069	4.30279	3.54956	3.34335	2.14878	2.46759	0.865548	2.77773	0.884933	0.400969	0.612721	-6.31707	NonSig	NonSwitched	Single-promoter
88	ENSG00000013810	TACC3	chr4	1721519	+	FALSE	1	KC-PB.3228.1	0.256701	0.256701	3.64366	3.64366	Major	Major	0	0	1.0268	0	3.75393	4.27489	3.51811	3.79489	2.8765	0	0	1.0268	0	3.75393	4.27489	3.51811	3.79489	2.8765	3.38696	2.13835	10.3536	4.77364e-06	0.00240978	4.77791	UpReg	NonSwitched	Single-promoter
89	ENSG00000014123	UFL1	chr6	96521830	+	FALSE	1	KC-PB.3801.1	5.47531	5.47531	5.41442	5.41442	Major	Major	5.06452	6.20882	5.47817	5.14973	5.67141	5.62032	4.92644	5.21189	5.64203	5.06452	6.20882	5.47817	5.14973	5.67141	5.62032	4.92644	5.21189	5.64203	-0.0608923	5.44148	-0.220971	0.830426	0.92284	-6.70317	NonSig	NonSwitched	Single-promoter
90	ENSG00000014164	ZC3H3	chr8	143541472	-	FALSE	1	KC-PB.4276.1	0	0	0	0	Inactive	Inactive	0	0	0	0	0	0	0	0	0	0	0	0	0	0	0	0	0	0	0	0	0	1	1	-6.73005	NonSig	NonSwitched	Single-promoter
91	ENSG00000014824	SLC30A9	chr4	41990515	+	FALSE	1	KC-PB.3269.1,KC-PB.3269.2	5.93652	5.93652	6.04643	6.04643	Major	Major	6.42234	6.26694	5.85954	5.19728	5.86051	5.88594	6.26324	5.95334	6.2691	6.42234	6.26694	5.85954	5.19728	5.86051	5.88594	6.26324	5.95334	6.2691	0.109901	5.99758	0.428615	0.679052	0.834412	-6.62974	NonSig	NonSwitched	Single-promoter
92	ENSG00000014919	COX15	chr10	99732127	-	FALSE	1	KC-PB.650.1	3.10124	3.10124	3.12501	3.12501	Major	Major	3.94751	0	4.04986	4.40762	2.6675	3.23485	3.34335	2.80951	3.56983	3.94751	0	4.04986	4.40762	2.6675	3.23485	3.34335	2.80951	3.56983	0.0237642	3.11445	0.0276872	0.978562	1	-6.72962	NonSig	NonSwitched	Single-promoter
93	ENSG00000015171	ZMYND11	chr10	135496	+	FALSE	1	KC-PB.490.1,KC-PB.490.2	4.2894	4.2894	3.93308	3.93308	Major	Major	4.50096	4.82593	4.80607	3.02465	4.54259	3.64086	3.59815	4.31397	3.56983	4.50096	4.82593	4.80607	3.02465	4.54259	3.64086	3.59815	4.31397	3.56983	-0.356322	4.09145	-0.857626	0.415047	0.623302	-6.34112	NonSig	NonSwitched	Single-promoter
94	ENSG00000015479	MATR3	chr5	139293681	+	FALSE	1	KC-PB.3604.1,KC-PB.3604.2,KC-PB.3604.3,KC-PB.3604.4,KC-PB.3604.5,KC-PB.3604.7,KC-PB.3604.6	5.88478	5.88478	5.92194	5.92194	Major	Major	6.08174	6.01896	6.33785	5.10055	6.32925	6.33187	5.2819	5.97319	5.69346	6.08174	6.01896	6.33785	5.10055	6.32925	6.33187	5.2819	5.97319	5.69346	0.0371582	5.90542	0.118238	0.908676	0.966589	-6.72233	NonSig	NonSwitched	Single-promoter
95	ENSG00000015532	XYLT2	chr17	50346126	+	FALSE	1	KC-PB.1989.1	4.94795	4.94795	3.93022	3.93022	Major	Major	5.21221	5.06307	4.57441	4.94209	3.31065	4.4866	4.11591	3.96318	3.77476	5.21221	5.06307	4.57441	4.94209	3.31065	4.4866	4.11591	3.96318	3.77476	-1.01773	4.38254	-4.11944	0.00305588	0.0396484	-1.67571	DownReg	NonSwitched	Single-promoter
96	ENSG00000015568	RGPD5	chr2	109794302	+	FALSE	1	KC-PB.2478.1	0.535089	0.535089	0.331257	0.331257	Major	Major	0	1.00966	0	1.13069	0	0	0.725559	0	0.930726	0	1.00966	0	1.13069	0	0	0.725559	0	0.930726	-0.203832	0.421849	-0.598271	0.565539	0.744626	-6.53662	NonSig	NonSwitched	Single-promoter
97	ENSG00000015676	NUDCD3	chr7	44490633	-	FALSE	1	KC-PB.3955.1	6.77081	6.77081	5.96267	5.96267	Major	Major	6.81787	6.83927	6.82082	6.60527	5.16174	6.26169	6.03783	5.95334	6.39872	6.81787	6.83927	6.82082	6.60527	5.16174	6.26169	6.03783	5.95334	6.39872	-0.808143	6.32184	-3.28892	0.0104125	0.0749318	-2.9298	NonSig	NonSwitched	Single-promoter
98	ENSG00000016082	ISL1	chr5	51383448	+	FALSE	1	KC-PB.3474.1	0.503617	0.503617	1.8785	1.8785	Major	Major	0	2.01447	0	0	2.6675	2.48275	2.09346	2.14878	0	0	2.01447	0	0	2.6675	2.48275	2.09346	2.14878	0	1.37488	1.26744	2.11526	0.0659025	0.219161	-4.75907	NonSig	NonSwitched	Single-promoter
99	ENSG00000017260	ATP2C1	chr3	130894028	+	FALSE	1	KC-PB.3107.1,KC-PB.3107.2,KC-PB.3107.3,KC-PB.3107.4	7.87721	7.87721	6.8558	6.8558	Major	Major	8.6809	7.56605	7.7182	7.54368	6.7438	7.08352	6.70404	6.68899	7.05864	8.6809	7.56605	7.7182	7.54368	6.7438	7.08352	6.70404	6.68899	7.05864	-1.02141	7.30976	-4.0292	0.00347529	0.0416417	-1.80786	DownReg	NonSwitched	Single-promoter
100	ENSG00000017797	RALBP1	chr18	9475600	+	FALSE	1	KC-PB.2078.1	2.50311	2.50311	3.31256	3.31256	Major	Major	0	2.33736	3.63373	4.04136	2.6675	2.83177	4.00283	3.38474	3.67594	0	2.33736	3.63373	4.04136	2.6675	2.83177	4.00283	3.38474	3.67594	0.809446	2.9528	1.0345	0.329948	0.551377	-6.17463	NonSig	NonSwitched	Single-promoter
101	ENSG00000018236	CNTN1	chr12	40980988	+	FALSE	1	KC-PB.1015.1	5.86673	5.86673	5.78947	5.78947	Major	Major	6.74697	5.26668	5.29967	6.15358	5.96723	5.59771	5.32957	5.87107	6.18175	6.74697	5.26668	5.29967	6.15358	5.96723	5.59771	5.32957	5.87107	6.18175	-0.0772586	5.8238	-0.227691	0.825366	0.920093	-6.70151	NonSig	NonSwitched	Single-promoter
102	ENSG00000018408	WWTR1	chr3	149658047	-	FALSE	1	KC-PB.3136.1,KC-PB.3136.2	5.49003	5.49003	5.33283	5.33283	Major	Major	5.40876	5.69131	4.63591	6.22415	5.45372	4.91014	5.42044	5.21189	5.66798	5.40876	5.69131	4.63591	6.22415	5.45372	4.91014	5.42044	5.21189	5.66798	-0.157198	5.4027	-0.504637	0.626867	0.795329	-6.59159	NonSig	NonSwitched	Single-promoter
103	ENSG00000018510	AGPS	chr2	177392773	+	FALSE	1	KC-PB.2556.1,KC-PB.2556.2	5.9289	5.9289	5.29514	5.29514	Major	Major	6.39168	5.94968	5.63699	5.73726	5.83818	4.87296	5.50592	5.30883	4.9498	6.39168	5.94968	5.63699	5.73726	5.83818	4.87296	5.50592	5.30883	4.9498	-0.633764	5.57681	-2.56787	0.0321313	0.145223	-4.06052	NonSig	NonSwitched	Single-promoter
104	ENSG00000019144	PHLDB1	chr11	118621388	+	FALSE	1	KC-PB.931.1	2.9832	2.9832	2.5721	2.5721	Major	Major	3.94751	5.18865	0	2.79664	1.87839	2.66779	3.03368	2.40413	2.8765	3.94751	5.18865	0	2.79664	1.87839	2.66779	3.03368	2.40413	2.8765	-0.411102	2.75481	-0.446692	0.666462	0.825323	-6.6212	NonSig	NonSwitched	Single-promoter
105	ENSG00000019549	SNAI2	chr8	48921412	-	FALSE	1	KC-PB.4185.1	7.89474	7.89474	7.74638	7.74638	Major	Major	7.55894	7.87716	8.0416	8.10128	8.05522	7.72875	7.59839	7.50234	7.84723	7.55894	7.87716	8.0416	8.10128	8.05522	7.72875	7.59839	7.50234	7.84723	-0.148359	7.81232	-0.885339	0.400762	0.612721	-6.31671	NonSig	NonSwitched	Single-promoter
106	ENSG00000020129	NCDN	chr1	35557812	+	FALSE	1	KC-PB.107.1	4.432	4.432	4.28534	4.28534	Major	Major	5.28074	4.18812	4.44295	3.81619	3.84631	4.27489	4.27047	4.31397	4.72108	5.28074	4.18812	4.44295	3.81619	3.84631	4.27489	4.27047	4.31397	4.72108	-0.146659	4.35053	-0.484535	0.640467	0.804829	-6.60225	NonSig	NonSwitched	Single-promoter
107	ENSG00000020922	MRE11	chr11	94493810	-	FALSE	1	KC-PB.886.1	2.57398	2.57398	3.33008	3.33008	Major	Major	3.32448	3.92487	3.04658	0	3.84631	3.23485	2.63885	2.97619	3.95417	3.32448	3.92487	3.04658	0	3.84631	3.23485	2.63885	2.97619	3.95417	0.756092	2.99404	0.997243	0.346679	0.56638	-6.21175	NonSig	NonSwitched	Single-promoter
108	ENSG00000021574	SPAST	chr2	32063665	+	FALSE	1	KC-PB.2364.1,KC-PB.2364.2	3.85668	3.85668	4.45904	4.45904	Major	Major	3.76816	5.2282	3.63373	2.79664	4.59679	4.4866	4.45374	4.2503	4.50777	3.76816	5.2282	3.63373	2.79664	4.59679	4.4866	4.45374	4.2503	4.50777	0.60236	4.19133	1.43144	0.188668	0.400906	-5.72014	NonSig	NonSwitched	Single-promoter
109	ENSG00000021776	AQR	chr15	34969742	-	FALSE	1	KC-PB.1521.1	4.7705	4.7705	4.35052	4.35052	Major	Major	4.50096	5.30417	3.5078	5.76908	3.65521	4.15612	4.72727	4.95662	4.25737	4.50096	5.30417	3.5078	5.76908	3.65521	4.15612	4.72727	4.95662	4.25737	-0.419983	4.53718	-0.88844	0.399186	0.611485	-6.31394	NonSig	NonSwitched	Single-promoter
110	ENSG00000022840	RNF10	chr12	120534353	+	FALSE	1	KC-PB.1203.1,KC-PB.1203.2,KC-PB.1203.5,KC-PB.1203.4,KC-PB.1203.3	7.62335	7.62335	6.9923	6.9923	Major	Major	7.91211	7.48676	7.47908	7.61545	6.95566	7.28093	7.22259	6.68899	6.81336	7.91211	7.48676	7.47908	7.61545	6.95566	7.28093	7.22259	6.68899	6.81336	-0.631047	7.27277	-3.69548	0.00564797	0.0527328	-2.30588	NonSig	NonSwitched	Single-promoter
111	ENSG00000023041	ZDHHC6	chr10	112446914	-	FALSE	1	KC-PB.687.1	3.61699	3.61699	3.78146	3.78146	Major	Major	5.28074	4.54199	1.62059	3.02465	2.44918	4.02669	3.94279	4.37494	4.11372	5.28074	4.54199	1.62059	3.02465	2.44918	4.02669	3.94279	4.37494	4.11372	0.164471	3.70837	0.219213	0.831751	0.922869	-6.70359	NonSig	NonSwitched	Single-promoter
112	ENSG00000023228	NDUFS1	chr2	206159447	-	FALSE	1	KC-PB.2598.1	5.31152	5.31152	4.68965	4.68965	Major	Major	5.58171	4.87658	5.37374	5.41405	3.65521	4.91014	5.10142	4.83169	4.9498	5.58171	4.87658	5.37374	5.41405	3.65521	4.91014	5.10142	4.83169	4.9498	-0.621867	4.96604	-1.99126	0.0801305	0.242437	-4.9445	NonSig	NonSwitched	Single-promoter
113	ENSG00000023734	STRAP	chr12	15882404	+	FALSE	1	KC-PB.987.1,KC-PB.987.2	7.64729	7.64729	7.52473	7.52473	Major	Major	7.30294	7.90182	7.76023	7.62418	7.63066	7.55773	8.18573	7.1909	7.05864	7.30294	7.90182	7.76023	7.62418	7.63066	7.55773	8.18573	7.1909	7.05864	-0.122558	7.5792	-0.496351	0.632455	0.798457	-6.59603	NonSig	NonSwitched	Single-promoter
114	ENSG00000023909	GCLM	chr1	93909456	-	FALSE	1	KC-PB.224.1	2.53571	2.53571	3.11666	3.11666	Major	Major	2.68046	2.82388	3.5078	1.13069	1.87839	3.54956	3.67398	3.79489	2.68648	2.68046	2.82388	3.5078	1.13069	1.87839	3.54956	3.67398	3.79489	2.68648	0.58095	2.85846	1.03391	0.330206	0.551377	-6.17522	NonSig	NonSwitched	Single-promoter
115	ENSG00000024048	UBR2	chr6	42564201	+	FALSE	1	KC-PB.3734.1	4.7991	4.7991	4.38161	4.38161	Major	Major	5.63504	4.26618	4.2983	4.99687	4.09253	4.87296	4.57737	5.03428	3.3309	5.63504	4.26618	4.2983	4.99687	4.09253	4.87296	4.57737	5.03428	3.3309	-0.417491	4.56716	-0.986424	0.351656	0.570771	-6.22233	NonSig	NonSwitched	Single-promoter
116	ENSG00000024422	EHD2	chr19	47713401	+	FALSE	1	KC-PB.2291.1,KC-PB.2291.2	5.94177	5.94177	5.67815	5.67815	Major	Major	6.19262	5.51069	5.9102	6.15358	5.67141	5.78948	5.54683	5.84975	5.53331	6.19262	5.51069	5.9102	6.15358	5.67141	5.78948	5.54683	5.84975	5.53331	-0.263617	5.79532	-1.55809	0.156268	0.357487	-5.5559	NonSig	NonSwitched	Single-promoter
117	ENSG00000025770	NCAPH2	chr22	50508226	+	FALSE	1	KC-PB.2908.1	5.41225	5.41225	5.59256	5.59256	Major	Major	5.68647	5.26668	4.80607	5.88977	5.86051	5.34967	5.88668	5.27724	5.58869	5.68647	5.26668	4.80607	5.88977	5.86051	5.34967	5.88668	5.27724	5.58869	0.180306	5.51242	0.719477	0.491501	0.686562	-6.45289	NonSig	NonSwitched	Single-promoter
118	ENSG00000025796	SEC63	chr6	107958149	-	FALSE	1	KC-PB.3809.1,KC-PB.3809.2,KC-PB.3809.3	5.35502	5.35502	5.8132	5.8132	Major	Major	5.14026	5.74682	5.83353	4.69946	6.0666	5.20758	6.26324	5.69096	5.8376	5.14026	5.74682	5.83353	4.69946	6.0666	5.20758	6.26324	5.69096	5.8376	0.45818	5.60956	1.52982	0.163036	0.365674	-5.59324	NonSig	NonSwitched	Single-promoter
119	ENSG00000025800	KPNA6	chr1	32108047	+	FALSE	1	KC-PB.96.1	5.73693	5.73693	5.69845	5.69845	Major	Major	5.73613	5.57344	5.63699	6.00115	5.74525	5.5514	5.39825	5.84975	5.94761	5.73613	5.57344	5.63699	6.00115	5.74525	5.5514	5.39825	5.84975	5.94761	-0.0384763	5.71555	-0.243884	0.81321	0.912839	-6.69733	NonSig	NonSwitched	Single-promoter
120	ENSG00000026025	VIM	chr10	17229277	+	FALSE	1	KC-PB.521.1	7.81072	7.81072	7.78889	7.78889	Major	Major	7.90127	7.29526	8.60757	7.43877	8.21536	7.79485	7.71516	7.86845	7.35064	7.90127	7.29526	8.60757	7.43877	8.21536	7.79485	7.71516	7.86845	7.35064	-0.0218256	7.79859	-0.0745615	0.94232	0.986654	-6.72698	NonSig	NonSwitched	Single-promoter
121	ENSG00000026508	CD44	chr11	35139120	+	FALSE	1	KC-PB.781.1,KC-PB.781.2,KC-PB.781.3,KC-PB.781.4,KC-PB.781.7,KC-PB.781.6,KC-PB.781.5	10.1125	47.2643	10.174	48.4546	Major	Minor	10.2443	10.214	10.2217	9.76985	10.1164	10.0773	10.1941	10.1992	10.2833	47.7354	48.1221	47.1855	46.0142	47.7878	47.8997	48.781	48.5162	49.2885	0.0615641	10.1467	0.455447	0.660404	0.821174	-6.61695	NonSig	NonSwitched	Multi-promoter
122	ENSG00000026508	CD44	chr11	35196839	+	FALSE	2	KC-PB.781.8	8.55877	47.2643	8.84436	48.4546	Minor	Minor	8.85956	8.78409	8.44098	8.15043	8.76063	8.66681	8.88725	8.80571	9.10138	47.7354	48.1221	47.1855	46.0142	47.7878	47.8997	48.781	48.5162	49.2885	0.285593	8.71743	1.60672	0.145218	0.34166	-5.49082	NonSig	NonSwitched	Multi-promoter
123	ENSG00000026508	CD44	chr11	35211264	+	TRUE	3	KC-PB.781.9	9.39324	47.2643	9.70732	48.4546	NA	NA	9.38437	9.71098	9.3057	9.17189	9.52217	9.62786	9.84837	9.68575	9.85246	47.7354	48.1221	47.1855	46.0142	47.7878	47.8997	48.781	48.5162	49.2885	0.314088	9.56773	2.14976	0.0624019	0.214649	-4.70688	NonSig	NonSwitched	Multi-promoter
124	ENSG00000026508	CD44	chr11	35214880	+	TRUE	4	KC-PB.781.10	9.37935	47.2643	9.4958	48.4546	NA	NA	9.3449	9.41798	9.47931	9.27522	9.42628	9.37879	9.64672	9.46691	9.56031	47.7354	48.1221	47.1855	46.0142	47.7878	47.8997	48.781	48.5162	49.2885	0.116448	9.44405	1.05491	0.321045	0.54452	-6.15384	NonSig	NonSwitched	Multi-promoter
125	ENSG00000026508	CD44	chr11	35221702	+	TRUE	5	KC-PB.781.11	9.82047	47.2643	10.2331	48.4546	NA	NA	9.90219	9.99509	9.7378	9.64679	9.96232	10.149	10.2046	10.3586	10.491	47.7354	48.1221	47.1855	46.0142	47.7878	47.8997	48.781	48.5162	49.2885	0.412644	10.0497	2.83163	0.0211793	0.11495	-3.64605	NonSig	NonSwitched	Multi-promoter
126	ENSG00000026751	SLAMF7	chr1	160739249	+	FALSE	1	KC-PB.339.1	1.15899	1.15899	1.68531	1.68531	Major	Major	3.03811	1.59783	0	0	2.44918	2.48275	0.725559	1.83831	0.930726	3.03811	1.59783	0	0	2.44918	2.48275	0.725559	1.83831	0.930726	0.52632	1.45139	0.743265	0.477721	0.67539	-6.43486	NonSig	NonSwitched	Single-promoter
127	ENSG00000027075	PRKCH	chr14	61321529	+	FALSE	1	KC-PB.1429.1	5.12039	5.12039	4.32063	4.32063	Major	Major	5.8306	4.01806	4.2983	6.3346	4.48627	3.64086	4.65427	4.31397	4.50777	5.8306	4.01806	4.2983	6.3346	4.48627	3.64086	4.65427	4.31397	4.50777	-0.799764	4.67608	-1.5952	0.147769	0.34606	-5.50633	NonSig	NonSwitched	Single-promoter
128	ENSG00000027697	IFNGR1	chr6	137219404	-	FALSE	1	KC-PB.3855.1	6.90395	6.90395	7.15006	7.15006	Major	Major	6.77099	6.99639	6.62243	7.22598	6.94525	6.97366	7.41718	7.00088	7.41334	6.77099	6.99639	6.62243	7.22598	6.94525	6.97366	7.41718	7.00088	7.41334	0.246117	7.04068	1.36681	0.207368	0.423431	-5.80074	NonSig	NonSwitched	Single-promoter
129	ENSG00000028116	VRK2	chr2	58046838	+	FALSE	1	KC-PB.2403.1	3.36701	3.36701	3.10024	3.10024	Major	Major	2.20385	2.82388	4.2983	4.142	3.43488	3.11259	2.7828	2.97619	3.19474	2.20385	2.82388	4.2983	4.142	3.43488	3.11259	2.7828	2.97619	3.19474	-0.266767	3.2188	-0.613275	0.556036	0.74034	-6.52701	NonSig	NonSwitched	Single-promoter
130	ENSG00000028203	VEZT	chr12	95217805	+	FALSE	1	KC-PB.1133.1,KC-PB.1133.2,KC-PB.1133.3,KC-PB.1133.4,KC-PB.1133.5,KC-PB.1133.6	4.54272	11.1714	4.06926	10.541	Minor	Minor	4.107	4.71896	4.85861	4.4863	3.75393	3.88449	4.41005	4.04049	4.25737	10.6459	11.6806	11.4961	10.8628	10.0343	10.3597	10.8246	10.6556	10.831	-0.473454	4.27969	-2.32968	0.046907	0.180749	-4.43138	NonSig	NonSwitched	Multi-promoter
131	ENSG00000028203	VEZT	chr12	95263008	+	TRUE	2	KC-PB.1133.7	6.62863	11.1714	6.47178	10.541	NA	NA	6.53886	6.96162	6.63754	6.37652	6.28041	6.47521	6.41459	6.61509	6.57362	10.6459	11.6806	11.4961	10.8628	10.0343	10.3597	10.8246	10.6556	10.831	-0.156849	6.54149	-1.05546	0.320807	0.544377	-6.15328	NonSig	NonSwitched	Multi-promoter
132	ENSG00000029363	BCLAF1	chr6	136289844	-	FALSE	1	KC-PB.3852.1,KC-PB.3852.2	4.95178	4.95178	6.61047	6.61047	Major	Major	3.56331	5.66273	5.69593	4.88515	6.76763	6.3724	6.4256	6.78197	6.70474	3.56331	5.66273	5.69593	4.88515	6.76763	6.3724	6.4256	6.78197	6.70474	1.65869	5.87327	3.93129	0.00400096	0.043397	-1.95249	UpReg	NonSwitched	Single-promoter
133	ENSG00000029364	SLC39A9	chr14	69398688	+	FALSE	1	KC-PB.1452.1	5.89749	5.89749	5.98406	5.98406	Major	Major	5.73613	6.26694	5.4094	6.17749	5.76905	6.07787	6.52109	5.76116	5.79114	5.73613	6.26694	5.4094	6.17749	5.76905	6.07787	6.52109	5.76116	5.79114	0.086574	5.94559	0.361165	0.726948	0.862584	-6.6586	NonSig	NonSwitched	Single-promoter
134	ENSG00000029639	TFB1M	chr6	155314494	-	FALSE	1	KC-PB.3877.1	5.30757	5.30757	4.32431	4.32431	Major	Major	5.58171	5.34071	5.54381	4.76405	4.09253	5.11508	4.00283	4.37494	4.03615	5.58171	5.34071	5.54381	4.76405	4.09253	5.11508	4.00283	4.37494	4.03615	-0.983263	4.76131	-3.51454	0.00739615	0.0626031	-2.58151	NonSig	NonSwitched	Single-promoter
135	ENSG00000029725	RABEP1	chr17	5282275	+	FALSE	1	KC-PB.1875.1,KC-PB.1875.2	5.30297	5.30297	5.30865	5.30865	Major	Major	4.81009	5.10616	6.0523	5.24332	5.04962	5.50355	5.66304	5.14345	5.18361	4.81009	5.10616	6.0523	5.24332	5.04962	5.50355	5.66304	5.14345	5.18361	0.00568562	5.30613	0.0216718	0.983219	1	-6.72979	NonSig	NonSwitched	Single-promoter
136	ENSG00000029993	HMGB3	chrX	150983288	+	FALSE	1	KC-PB.4662.1	1.74282	1.74282	5.73488	5.73488	Major	Major	3.03811	0	0	3.93316	6.02767	5.34967	5.69978	5.80613	5.79114	3.03811	0	0	3.93316	6.02767	5.34967	5.69978	5.80613	5.79114	3.99206	3.96063	4.77739	0.00124034	0.0244968	-0.748039	UpReg	NonSwitched	Single-promoter
137	ENSG00000030066	NUP160	chr11	47848350	-	FALSE	1	KC-PB.801.1,KC-PB.801.2,KC-PB.801.3,KC-PB.801.4	4.58062	4.58062	4.59501	4.59501	Major	Major	4.50096	4.66235	4.75155	4.40762	4.42767	5.11508	4.36501	4.2503	4.81696	4.50096	4.66235	4.75155	4.40762	4.42767	5.11508	4.36501	4.2503	4.81696	0.0143861	4.58861	0.0716433	0.944573	0.988216	-6.72721	NonSig	NonSwitched	Single-promoter
138	ENSG00000031081	ARHGAP31	chr3	119294384	+	FALSE	1	KC-PB.3073.1	5.08814	5.08814	3.66789	3.66789	Major	Major	5.28074	4.92551	5.26116	4.88515	3.84631	3.80776	3.43338	3.38474	3.86726	5.28074	4.92551	5.26116	4.88515	3.84631	3.80776	3.43338	3.38474	3.86726	-1.42025	4.29911	-8.50498	2.16583e-05	0.00341917	3.33699	DownReg	NonSwitched	Single-promoter
139	ENSG00000031698	SARS1	chr1	109213932	+	FALSE	1	KC-PB.240.1,KC-PB.240.3,KC-PB.240.2	3.16597	3.16597	1.94592	1.94592	Major	Major	4.50096	2.33736	3.63373	2.19185	2.19183	3.23485	2.09346	0	2.20943	4.50096	2.33736	3.63373	2.19185	2.19183	3.23485	2.09346	0	2.20943	-1.22006	2.48816	-1.71444	0.123228	0.310913	-5.34307	NonSig	NonSwitched	Single-promoter
140	ENSG00000031823	RANBP3	chr19	5978162	-	FALSE	1	KC-PB.2187.2,KC-PB.2187.1	2.96792	2.96792	5.32667	5.32667	Major	Major	2.20385	3.92487	3.21724	2.52571	5.69644	4.67118	5.35283	5.24494	5.66798	2.20385	3.92487	3.21724	2.52571	5.69644	4.67118	5.35283	5.24494	5.66798	2.35876	4.27834	6.29528	0.000195726	0.00915535	1.14222	UpReg	NonSwitched	Single-promoter
141	ENSG00000032219	ARID4A	chr14	58298559	+	FALSE	1	KC-PB.1421.1	3.67139	3.67139	2.81057	2.81057	Major	Major	3.56331	4.18812	4.13751	2.79664	2.44918	3.54956	3.03368	3.1256	1.8948	3.56331	4.18812	4.13751	2.79664	2.44918	3.54956	3.03368	3.1256	1.8948	-0.860829	3.19316	-2.11179	0.0662646	0.219575	-4.7643	NonSig	NonSwitched	Single-promoter
142	ENSG00000032444	PNPLA6	chr19	7535718	+	FALSE	1	KC-PB.2192.1	3.85646	3.85646	4.13366	4.13366	Major	Major	4.107	2.82388	4.80607	3.6889	4.36658	4.6272	3.74602	3.60434	4.32416	4.107	2.82388	4.80607	3.6889	4.36658	4.6272	3.74602	3.60434	4.32416	0.277196	4.01046	0.691574	0.507984	0.699954	-6.47339	NonSig	NonSwitched	Single-promoter
143	ENSG00000033050	ABCF2	chr7	151227230	-	FALSE	1	KC-PB.4095.1,KC-PB.4095.2,KC-PB.4095.3	4.28123	4.28123	5.26557	5.26557	Major	Major	5.06452	3.01687	4.63591	4.40762	5.61999	4.58184	5.15533	5.27724	5.69346	5.06452	3.01687	4.63591	4.40762	5.61999	4.58184	5.15533	5.27724	5.69346	0.984344	4.82809	2.33406	0.0465818	0.180194	-4.42462	NonSig	NonSwitched	Single-promoter
144	ENSG00000033100	CHPF2	chr7	151232501	+	FALSE	1	KC-PB.4093.1	5.15325	5.15325	4.91297	4.91297	Major	Major	4.38121	5.47826	5.26116	5.49239	4.92804	4.7956	5.37572	4.43344	5.03202	4.38121	5.47826	5.26116	5.49239	4.92804	4.7956	5.37572	4.43344	5.03202	-0.240288	5.01976	-0.857364	0.415184	0.623302	-6.34135	NonSig	NonSwitched	Single-promoter
145	ENSG00000033170	FUT8	chr14	65411898	+	FALSE	1	KC-PB.1438.1	1.88489	3.58	1.72376	3.99048	Major	Minor	0	2.82388	1.0268	3.6889	1.47738	2.27043	0	2.97619	1.8948	0	5.64776	4.98333	3.6889	2.39746	5.38303	1.5659	5.38033	5.2257	-0.161133	1.79538	-0.188791	0.854767	0.933834	-6.71041	NonSig	NonSwitched	Multi-promoter
146	ENSG00000033170	FUT8	chr14	65412978	+	FALSE	2	KC-PB.1438.2	1.6951	3.58	2.26672	3.99048	Minor	Major	0	2.82388	3.95653	0	0.920075	3.11259	1.5659	2.40413	3.3309	0	5.64776	4.98333	3.6889	2.39746	5.38303	1.5659	5.38033	5.2257	0.571618	2.01267	0.606717	0.560178	0.741157	-6.53124	NonSig	NonSwitched	Multi-promoter
147	ENSG00000033178	UBA6	chr4	67701169	-	FALSE	1	KC-PB.3292.1,KC-PB.3292.2,KC-PB.3292.3,KC-PB.3292.4,KC-PB.3292.5,KC-PB.3292.6	2.37679	2.37679	3.24341	3.24341	Major	Major	0	2.60103	3.21724	3.6889	3.65521	3.34756	2.7828	2.97619	3.45531	0	2.60103	3.21724	3.6889	3.65521	3.34756	2.7828	2.97619	3.45531	0.866623	2.85825	1.25865	0.242224	0.465378	-5.93028	NonSig	NonSwitched	Single-promoter
148	ENSG00000033627	ATP6V0A1	chr17	42458866	+	FALSE	1	KC-PB.1958.1,KC-PB.1958.2	4.35694	4.35694	4.08331	4.08331	Major	Major	4.25061	3.71823	4.69489	4.76405	4.42767	4.02669	3.59815	4.2503	4.11372	4.25061	3.71823	4.69489	4.76405	4.42767	4.02669	3.59815	4.2503	4.11372	-0.273638	4.20492	-1.05768	0.319851	0.543364	-6.151	NonSig	NonSwitched	Single-promoter
149	ENSG00000033800	PIAS1	chr15	68054316	+	FALSE	1	KC-PB.1605.1	4.6869	4.6869	5.6031	5.6031	Major	Major	4.81009	5.60382	3.5078	4.82587	5.42405	5.42866	5.37572	6.06856	5.71851	4.81009	5.60382	3.5078	4.82587	5.42405	5.42866	5.37572	6.06856	5.71851	0.916204	5.1959	2.3725	0.0438213	0.174451	-4.36512	NonSig	NonSwitched	Single-promoter
150	ENSG00000034152	MAP2K3	chr17	21284709	+	FALSE	1	KC-PB.1912.2	5.33494	5.33494	5.80713	5.80713	Major	Major	5.52633	4.77344	5.66676	5.37322	6.00781	5.76939	6.12147	5.69096	5.44603	5.52633	4.77344	5.66676	5.37322	6.00781	5.76939	6.12147	5.69096	5.44603	0.472191	5.59727	2.13869	0.0635051	0.215458	-4.72366	NonSig	NonSwitched	Single-promoter
151	ENSG00000034677	RNF19A	chr8	100310157	-	FALSE	1	KC-PB.4237.1,KC-PB.4237.2,KC-PB.4237.3	6.35848	6.35848	5.5041	5.5041	Major	Major	6.62045	6.42843	6.16089	6.22415	5.76905	5.34967	5.37572	5.14345	5.88262	6.62045	6.42843	6.16089	6.22415	5.76905	5.34967	5.37572	5.14345	5.88262	-0.854376	5.88383	-4.49288	0.00181757	0.0310822	-1.14126	NonSig	NonSwitched	Single-promoter
152	ENSG00000035403	VCL	chr10	73998116	+	FALSE	1	KC-PB.603.3,KC-PB.603.2,KC-PB.603.1	8.25315	14.478	7.79629	14.7713	Major	Major	8.67454	8.44547	8.03591	7.85668	7.80194	7.87225	7.9002	7.74107	7.66598	14.9023	15.0792	13.7604	14.1699	14.8085	14.8013	15.1037	14.6522	14.4909	-0.456861	7.99934	-2.5155	0.0349157	0.151004	-4.14247	NonSig	NonSwitched	Multi-promoter
153	ENSG00000035403	VCL	chr10	74101074	+	TRUE	2	KC-PB.603.4	6.22481	14.478	6.97505	14.7713	NA	NA	6.22776	6.63377	5.72452	6.31318	7.0066	6.92908	7.20353	6.9111	6.82494	14.9023	15.0792	13.7604	14.1699	14.8085	14.8013	15.1037	14.6522	14.4909	0.750238	6.64161	3.96658	0.00380228	0.0425441	-1.9002	NonSig	NonSwitched	Multi-promoter
154	ENSG00000035681	NSMAF	chr8	58659842	-	FALSE	1	KC-PB.4194.1,KC-PB.4194.2	5.91402	5.91402	4.99849	4.99849	Major	Major	6.04281	6.60402	5.85954	5.14973	4.8409	5.45406	5.10142	4.64626	4.9498	6.04281	6.60402	5.85954	5.14973	4.8409	5.45406	5.10142	4.64626	4.9498	-0.915535	5.40539	-3.11182	0.0136753	0.0887148	-3.20602	NonSig	NonSwitched	Single-promoter
155	ENSG00000035928	RFC1	chr4	39366362	-	FALSE	1	KC-PB.3261.1	4.35686	4.35686	4.1032	4.1032	Major	Major	4.38121	4.60343	3.95653	4.4863	4.48627	3.88449	3.81464	3.88148	4.44913	4.38121	4.60343	3.95653	4.4863	4.48627	3.88449	3.81464	3.88148	4.44913	-0.253664	4.21594	-1.19103	0.266412	0.490123	-6.00759	NonSig	NonSwitched	Single-promoter
156	ENSG00000036054	TBC1D23	chr3	100260943	+	FALSE	1	KC-PB.3051.1,KC-PB.3051.2,KC-PB.3051.3,KC-PB.3051.5,KC-PB.3051.4	4.86747	4.86747	5.6899	5.6899	Major	Major	3.76816	5.57344	4.63591	5.49239	5.26577	5.5514	5.46381	6.24224	5.92627	3.76816	5.57344	4.63591	5.49239	5.26577	5.5514	5.46381	6.24224	5.92627	0.822426	5.32438	2.07328	0.0704206	0.228055	-4.82224	NonSig	NonSwitched	Single-promoter
157	ENSG00000037042	TUBG2	chr17	42659273	+	FALSE	1	KC-PB.1962.1	3.10284	3.10284	2.92189	2.92189	Major	Major	3.94751	1.00966	3.04658	4.40762	2.6675	3.45209	2.29902	2.62101	3.56983	3.94751	1.00966	3.04658	4.40762	2.6675	3.45209	2.29902	2.62101	3.56983	-0.18095	3.00231	-0.27212	0.792141	0.900588	-6.68935	NonSig	NonSwitched	Single-promoter
158	ENSG00000037474	NSUN2	chr5	6633296	-	FALSE	1	KC-PB.3436.1,KC-PB.3436.2	5.52533	5.52533	5.77876	5.77876	Major	Major	5.21221	5.87691	4.85861	6.15358	6.14145	5.78948	5.6061	5.71474	5.64203	5.21221	5.87691	4.85861	6.15358	6.14145	5.78948	5.6061	5.71474	5.64203	0.253433	5.66612	0.92199	0.382414	0.595219	-6.28345	NonSig	NonSwitched	Single-promoter
159	ENSG00000037749	MFAP3	chr5	154038967	+	FALSE	1	KC-PB.3644.1,KC-PB.3644.2	2.97774	2.97774	3.07441	3.07441	Major	Major	3.32448	2.82388	1.62059	4.142	2.85709	2.83177	2.7828	3.1256	3.77476	3.32448	2.82388	1.62059	4.142	2.85709	2.83177	2.7828	3.1256	3.77476	0.0966684	3.03144	0.203581	0.843558	0.929853	-6.70722	NonSig	NonSwitched	Single-promoter
160	ENSG00000037965	HOXC8	chr12	54009013	+	FALSE	1	KC-PB.1059.1	0	0	1.90564	1.90564	Inactive	Major	0	0	0	0	1.47738	2.83177	2.09346	3.1256	0	0	0	0	0	1.47738	2.83177	2.09346	3.1256	0	1.90564	1.05869	3.25614	0.0109485	0.0766331	-2.98077	NonSig	NonSwitched	Single-promoter
161	ENSG00000038210	PI4K2B	chr4	25234013	+	FALSE	1	KC-PB.3253.1	3.02588	3.02588	3.55661	3.55661	Major	Major	0	4.18812	3.5078	4.40762	4.09253	3.45209	3.88013	2.40413	3.95417	0	4.18812	3.5078	4.40762	4.09253	3.45209	3.88013	2.40413	3.95417	0.530728	3.32073	0.596265	0.566816	0.745203	-6.53789	NonSig	NonSwitched	Single-promoter
162	ENSG00000038358	EDC4	chr16	67873069	+	FALSE	1	KC-PB.1780.1	4.93753	4.93753	4.10336	4.10336	Major	Major	4.38121	4.82593	5.29967	5.24332	4.16608	4.27489	4.57737	3.38474	4.11372	4.38121	4.82593	5.29967	5.24332	4.16608	4.27489	4.57737	3.38474	4.11372	-0.834174	4.4741	-2.95559	0.0174382	0.10074	-3.45108	NonSig	NonSwitched	Single-promoter
163	ENSG00000039068	CDH1	chr16	68737292	+	FALSE	1	KC-PB.1789.1	8.08093	8.08093	8.08044	8.08044	Major	Major	8.20446	8.06358	7.76712	8.28857	7.97563	7.82922	8.23663	8.01453	8.34621	8.20446	8.06358	7.76712	8.28857	7.97563	7.82922	8.23663	8.01453	8.34621	-0.000486133	8.08066	-0.00300059	0.997676	1	-6.73004	NonSig	NonSwitched	Single-promoter
164	ENSG00000039123	MTREX	chr5	55307989	+	FALSE	1	KC-PB.3484.1,KC-PB.3484.2	5.24306	5.24306	5.22433	5.22433	Major	Major	5.73613	5.2282	4.95827	5.04964	4.96972	5.42866	4.76244	5.48512	5.47571	5.73613	5.2282	4.95827	5.04964	4.96972	5.42866	4.76244	5.48512	5.47571	-0.0187323	5.23265	-0.0819447	0.936622	0.985078	-6.72634	NonSig	NonSwitched	Single-promoter
165	ENSG00000039523	RIPOR1	chr16	67528810	+	FALSE	1	KC-PB.1779.1	0	0	0.163923	0.163923	Inactive	Inactive	0	0	0	0	0	0.819616	0	0	0	0	0	0	0	0	0.819616	0	0	0	0.163923	0.0910685	0.847649	0.420277	0.627503	-6.34975	NonSig	NonSwitched	Single-promoter
166	ENSG00000039560	RAI14	chr5	34656263	+	FALSE	1	KC-PB.3452.1,KC-PB.3452.2,KC-PB.3452.3,KC-PB.3452.4,KC-PB.3452.5	1.59354	1.59354	1.3899	1.3899	Major	Major	3.32448	1.00966	2.04002	0	2.44918	2.02139	2.47892	0	0	3.32448	1.00966	2.04002	0	2.44918	2.02139	2.47892	0	0	-0.203642	1.48041	-0.245104	0.812296	0.912389	-6.697	NonSig	NonSwitched	Single-promoter
167	ENSG00000040275	SPDL1	chr5	169583788	+	FALSE	1	KC-PB.3658.1	0.70597	0.70597	2.42877	2.42877	Major	Major	0	2.82388	0	0	2.19183	2.48275	2.63885	2.62101	2.20943	0	2.82388	0	0	2.19183	2.48275	2.63885	2.62101	2.20943	1.7228	1.66308	2.95005	0.0175899	0.101021	-3.45979	NonSig	NonSwitched	Single-promoter
168	ENSG00000040341	STAU2	chr8	73746840	-	FALSE	1	KC-PB.4207.1	2.71499	2.71499	3.83449	3.83449	Major	Major	3.03811	4.18812	3.63373	0	4.48627	3.80776	3.59815	3.60434	3.67594	3.03811	4.18812	3.63373	0	4.48627	3.80776	3.59815	3.60434	3.67594	1.1195	3.33694	1.44025	0.186234	0.397397	-5.70896	NonSig	NonSwitched	Single-promoter
169	ENSG00000040531	CTNS	chr17	3636760	+	FALSE	1	KC-PB.1860.1	2.11989	2.11989	0.611548	0.611548	Major	Major	3.32448	0	2.62936	2.52571	0	0	1.5659	0	1.49184	3.32448	0	2.62936	2.52571	0	0	1.5659	0	1.49184	-1.50834	1.28192	-2.12626	0.0647663	0.217211	-4.74246	NonSig	NonSwitched	Single-promoter
170	ENSG00000041802	LSG1	chr3	194672201	-	FALSE	1	KC-PB.3202.1,KC-PB.3202.2,KC-PB.3202.3,KC-PB.3202.4	4.13893	4.13893	4.87464	4.87464	Major	Major	3.56331	4.34023	4.51018	4.142	5.19726	4.4866	4.92644	4.54377	5.21915	3.56331	4.34023	4.51018	4.142	5.19726	4.4866	4.92644	4.54377	5.21915	0.735715	4.54766	2.95277	0.0175152	0.100918	-3.45551	NonSig	NonSwitched	Single-promoter
171	ENSG00000041982	TNC	chr9	115118157	-	FALSE	1	KC-PB.4412.1	3.36363	3.36363	4.79597	4.79597	Major	Major	3.94751	3.01687	4.2983	2.19185	4.74815	5.01625	4.22076	4.43344	5.56126	3.94751	3.01687	4.2983	2.19185	4.74815	5.01625	4.22076	4.43344	5.56126	1.43234	4.15938	3.09867	0.0139566	0.0892369	-3.2266	NonSig	NonSwitched	Single-promoter
172	ENSG00000042429	MED17	chr11	93784302	+	FALSE	1	KC-PB.882.1	3.11471	3.11471	3.072	3.072	Major	Major	2.68046	3.18706	3.36982	3.22149	1.87839	3.34756	3.14445	3.79489	3.19474	2.68046	3.18706	3.36982	3.22149	1.87839	3.34756	3.14445	3.79489	3.19474	-0.0427029	3.09098	-0.117014	0.909616	0.966735	-6.72249	NonSig	NonSwitched	Single-promoter
173	ENSG00000043093	DCUN1D1	chr3	182980519	-	FALSE	1	KC-PB.3178.1,KC-PB.3178.2	4.20584	4.20584	5.15342	5.15342	Major	Major	4.107	4.34023	4.44295	3.93316	5.53925	5.08288	4.61633	5.45719	5.07144	4.107	4.34023	4.44295	3.93316	5.53925	5.08288	4.61633	5.45719	5.07144	0.947581	4.73227	4.41099	0.00203334	0.0331831	-1.2567	NonSig	NonSwitched	Single-promoter
174	ENSG00000044090	CUL7	chr6	43053823	-	FALSE	1	KC-PB.3738.1	4.78943	4.78943	3.49524	3.49524	Major	Major	5.68647	4.54199	4.44295	4.4863	3.65521	3.80776	4.22076	1.83831	3.95417	5.68647	4.54199	4.44295	4.4863	3.65521	3.80776	4.22076	1.83831	3.95417	-1.29418	4.07044	-2.53346	0.033934	0.148858	-4.11438	NonSig	NonSwitched	Single-promoter
175	ENSG00000044115	CTNNA1	chr5	138753447	+	FALSE	1	KC-PB.3602.2,KC-PB.3602.1	6.88502	6.88502	6.87536	6.87536	Major	Major	7.12797	6.49478	6.59172	7.32564	7.07502	6.8161	6.80023	6.78197	6.90348	7.12797	6.49478	6.59172	7.32564	7.07502	6.8161	6.80023	6.78197	6.90348	-0.00966393	6.87966	-0.0495246	0.961666	0.996712	-6.72869	NonSig	NonSwitched	Single-promoter
176	ENSG00000044574	HSPA5	chr9	125241343	-	FALSE	1	KC-PB.4426.1,KC-PB.4426.2,KC-PB.4426.3	6.55603	6.55603	6.76579	6.76579	Major	Major	6.81787	6.99639	6.11843	6.29143	6.37649	6.46275	7.25998	6.81535	6.91436	6.81787	6.99639	6.11843	6.29143	6.37649	6.46275	7.25998	6.81535	6.91436	0.209758	6.67256	0.827285	0.431093	0.638291	-6.3671	NonSig	NonSwitched	Single-promoter
177	ENSG00000046604	DSG2	chr18	31498174	+	FALSE	1	KC-PB.2108.1,KC-PB.2108.2,KC-PB.2108.5,KC-PB.2108.4	1.46833	1.46833	3.01684	3.01684	Major	Major	1.48725	0	2.62936	1.75672	3.31065	2.48275	3.34335	3.26098	2.68648	1.48725	0	2.62936	1.75672	3.31065	2.48275	3.34335	3.26098	2.68648	1.54851	2.32862	3.18259	0.0122591	0.0833291	-3.0954	NonSig	NonSwitched	Single-promoter
178	ENSG00000047056	WDR37	chr10	1056410	+	FALSE	1	KC-PB.497.1	2.14011	2.14011	1.54096	1.54096	Major	Major	3.32448	2.01447	0	3.22149	0	2.27043	1.85366	0.894243	2.68648	3.32448	2.01447	0	3.22149	0	2.27043	1.85366	0.894243	2.68648	-0.599144	1.80725	-0.743025	0.477858	0.67539	-6.43504	NonSig	NonSwitched	Single-promoter
179	ENSG00000047188	YTHDC2	chr5	113513701	+	FALSE	1	KC-PB.3566.1,KC-PB.3566.2,KC-PB.3566.3,KC-PB.3566.4	4.64874	4.64874	3.98865	3.98865	Major	Major	5.14026	3.71823	4.63591	5.10055	3.31065	4.21673	4.36501	4.37494	3.67594	5.14026	3.71823	4.63591	5.10055	3.31065	4.21673	4.36501	4.37494	3.67594	-0.660082	4.28202	-1.84718	0.100378	0.275129	-5.15497	NonSig	NonSwitched	Single-promoter
180	ENSG00000047315	POLR2B	chr4	56977718	+	FALSE	1	KC-PB.3289.1	0.503617	6.97834	1.40681	8.1963	Minor	Minor	0	2.01447	0	0	1.87839	0	2.7828	1.44216	0.930726	6.1566	9.04481	6.71081	6.00115	8.71521	6.76628	9.68114	8.30085	7.51801	0.903197	1.00539	1.41818	0.19238	0.403725	-5.73686	NonSig	NonSwitched	Multi-promoter
181	ENSG00000047315	POLR2B	chr4	56978899	+	TRUE	2	KC-PB.3289.2	6.47472	6.97834	6.78948	8.1963	NA	NA	6.1566	7.03034	6.71081	6.00115	6.83682	6.76628	6.89834	6.85869	6.58729	6.1566	9.04481	6.71081	6.00115	8.71521	6.76628	9.68114	8.30085	7.51801	0.314759	6.64959	1.42379	0.190802	0.4025	-5.72979	NonSig	NonSwitched	Multi-promoter
182	ENSG00000047621	FERRY3	chr12	4538508	-	FALSE	1	KC-PB.968.1	2.27942	2.27942	3.70904	3.70904	Major	Major	3.56331	1.59783	3.95653	0	2.6675	4.21673	3.59815	3.49871	4.56413	3.56331	1.59783	3.95653	0	2.6675	4.21673	3.59815	3.49871	4.56413	1.42963	3.07365	1.74785	0.117059	0.30334	-5.29632	NonSig	NonSwitched	Single-promoter
183	ENSG00000047634	SCML1	chrX	17737487	+	FALSE	1	KC-PB.4557.1,KC-PB.4557.2	0	0	0.917051	0.917051	Inactive	Major	0	0	0	0	0	2.02139	0.725559	1.83831	0	0	0	0	0	0	2.02139	0.725559	1.83831	0	0.917051	0.509473	1.98886	0.0804334	0.242626	-4.94806	NonSig	NonSwitched	Single-promoter
184	ENSG00000047849	MAP4	chr3	48088879	-	FALSE	1	KC-PB.2989.1,KC-PB.2989.2	8.13824	8.13824	8.11358	8.11358	Major	Major	8.60274	8.08528	7.8473	8.01765	8.23258	7.9767	7.98079	7.94585	8.432	8.60274	8.08528	7.8473	8.01765	8.23258	7.9767	7.98079	7.94585	8.432	-0.0246582	8.12454	-0.131313	0.898638	0.961089	-6.72054	NonSig	NonSwitched	Single-promoter
185	ENSG00000047932	GOPC	chr6	117602518	-	FALSE	1	KC-PB.3833.1,KC-PB.3833.2	4.01199	4.01199	4.87012	4.87012	Major	Major	2.68046	3.82525	4.04986	5.49239	4.36658	4.6272	5.25746	5.42872	4.67063	2.68046	3.82525	4.04986	5.49239	4.36658	4.6272	5.25746	5.42872	4.67063	0.858129	4.48873	1.65745	0.134449	0.327856	-5.42183	NonSig	NonSwitched	Single-promoter
186	ENSG00000048342	CC2D2A	chr4	15479221	+	FALSE	1	KC-PB.3244.1	3.8265	3.8265	2.97327	2.97327	Major	Major	3.76816	4.01806	4.2983	3.22149	3.43488	2.83177	2.91369	2.80951	2.8765	3.76816	4.01806	4.2983	3.22149	3.43488	2.83177	2.91369	2.80951	2.8765	-0.853234	3.35248	-3.57278	0.00677815	0.0592047	-2.49242	NonSig	NonSwitched	Single-promoter
187	ENSG00000048544	MRPS10	chr6	42217861	-	FALSE	1	KC-PB.3733.1,KC-PB.3733.3	2.55099	2.55099	3.14994	3.14994	Major	Major	3.03811	3.47695	0	3.6889	3.02462	3.72672	3.14445	2.80951	3.04437	3.03811	3.47695	0	3.6889	3.02462	3.72672	3.14445	2.80951	3.04437	0.598946	2.88374	0.835602	0.426653	0.633606	-6.36006	NonSig	NonSwitched	Single-promoter
188	ENSG00000048740	CELF2	chr10	11018029	+	FALSE	1	KC-PB.509.3	0.761646	0.761646	0	0	Major	Inactive	0	0	3.04658	0	0	0	0	0	0	0	0	3.04658	0	0	0	0	0	0	-0.761646	0.338509	-1.22948	0.252426	0.474801	-5.96399	NonSig	NonSwitched	Single-promoter
189	ENSG00000048991	R3HDM1	chr2	135531475	+	FALSE	1	KC-PB.2506.1	3.41577	3.41577	4.33016	4.33016	Major	Major	4.89998	3.71823	2.853	2.19185	3.54925	4.87296	4.72727	4.31397	4.18733	4.89998	3.71823	2.853	2.19185	3.54925	4.87296	4.72727	4.31397	4.18733	0.91439	3.92376	1.7028	0.125448	0.312922	-5.35926	NonSig	NonSwitched	Single-promoter
190	ENSG00000049130	KITLG	chr12	88580471	-	FALSE	1	KC-PB.1123.1	5.01038	5.01038	5.47587	5.47587	Major	Major	5.87561	4.66235	5.09593	4.40762	5.5113	6.30421	5.2326	5.33975	4.9915	5.87561	4.66235	5.09593	4.40762	5.5113	6.30421	5.2326	5.33975	4.9915	0.465493	5.26899	1.295	0.229993	0.453158	-5.88751	NonSig	NonSwitched	Single-promoter
191	ENSG00000049283	EPN3	chr17	50532690	+	FALSE	1	KC-PB.1990.1,KC-PB.1990.3,KC-PB.1990.4,KC-PB.1990.2	3.66462	6.7062	3.86923	5.98271	Major	Major	4.89998	4.60343	2.62936	2.52571	3.84631	4.21673	4.69123	3.26098	3.3309	8.22446	5.61309	6.13716	6.8501	7.60024	6.48716	5.8973	4.70314	5.2257	0.204612	3.77829	0.348605	0.736017	0.868635	-6.66344	NonSig	NonSwitched	Multi-promoter
192	ENSG00000049283	EPN3	chr17	50534595	+	FALSE	2	KC-PB.1990.6,KC-PB.1990.7	3.04158	6.7062	2.11348	5.98271	Minor	Minor	3.32448	1.00966	3.5078	4.3244	3.75393	2.27043	1.20607	1.44216	1.8948	8.22446	5.61309	6.13716	6.8501	7.60024	6.48716	5.8973	4.70314	5.2257	-0.928107	2.52597	-1.24749	0.246084	0.468074	-5.94323	NonSig	NonSwitched	Multi-promoter
193	ENSG00000049759	NEDD4L	chr18	58195465	+	FALSE	1	KC-PB.2144.2	0.371812	3.50581	0.331257	3.22448	Minor	Minor	1.48725	0	0	0	0	0	0.725559	0	0.930726	4.52536	4.41067	3.95653	1.13069	2.44918	2.97901	3.75924	2.80951	4.12546	-0.0405551	0.349282	-0.107103	0.917237	0.971173	-6.72372	NonSig	NonSwitched	Multi-promoter
194	ENSG00000049759	NEDD4L	chr18	58221571	+	FALSE	2	KC-PB.2144.5,KC-PB.2144.6,KC-PB.2144.4,KC-PB.2144.3	3.134	3.50581	2.89322	3.22448	Major	Major	3.03811	4.41067	3.95653	1.13069	2.44918	2.97901	3.03368	2.80951	3.19474	4.52536	4.41067	3.95653	1.13069	2.44918	2.97901	3.75924	2.80951	4.12546	-0.240778	3.00023	-0.39743	0.701022	0.848482	-6.64367	NonSig	NonSwitched	Multi-promoter
195	ENSG00000049860	HEXB	chr5	74685177	+	FALSE	1	KC-PB.3515.1,KC-PB.3515.2	6.41451	6.41451	5.96527	5.96527	Major	Major	6.32833	6.34095	6.59172	6.39703	6.3919	6.011	5.99413	5.59171	5.8376	6.32833	6.34095	6.59172	6.39703	6.3919	6.011	5.99413	5.59171	5.8376	-0.449238	6.16493	-2.62906	0.0291609	0.138921	-3.96455	NonSig	NonSwitched	Single-promoter
196	ENSG00000050165	DKK3	chr11	12008625	-	TRUE	2	KC-PB.747.2,KC-PB.747.3	6.96395	8.76037	6.63043	7.73483	NA	NA	6.26207	6.76055	7.89838	6.93479	7.02648	6.3988	6.12147	6.95169	6.65372	9.30018	9.77742	7.89838	8.06548	9.21831	6.3988	6.12147	8.79	8.14555	-0.333517	6.77866	-0.982411	0.353516	0.572609	-6.22624	NonSig	NonSwitched	Multi-promoter
197	ENSG00000050165	DKK3	chr11	12009331	-	FALSE	1	KC-PB.747.1	1.79642	8.76037	1.1044	7.73483	Minor	Minor	3.03811	3.01687	0	1.13069	2.19183	0	0	1.83831	1.49184	9.30018	9.77742	7.89838	8.06548	9.21831	6.3988	6.12147	8.79	8.14555	-0.692022	1.41196	-0.89177	0.397498	0.610412	-6.31095	NonSig	NonSwitched	Multi-promoter
198	ENSG00000050405	LIMA1	chr12	50222431	-	TRUE	2	KC-PB.1047.1,KC-PB.1047.5	5.97242	9.47623	7.55875	11.5625	NA	NA	5.06452	6.70558	6.11843	6.00115	7.29588	7.3502	7.63679	7.85781	7.65305	9.31514	11.309	8.48301	8.79779	11.3884	10.9911	11.4514	11.821	12.1608	1.58633	6.85371	5.15371	0.000761891	0.01775	-0.246971	UpReg	NonSwitched	Multi-promoter
199	ENSG00000050405	LIMA1	chr12	50283510	-	FALSE	1	KC-PB.1047.3	3.50381	9.47623	4.0038	11.5625	Minor	Minor	4.25061	4.60343	2.36458	2.79664	4.09253	3.64086	3.81464	3.96318	4.50777	9.31514	11.309	8.48301	8.79779	11.3884	10.9911	11.4514	11.821	12.1608	0.499982	3.78158	1.05671	0.320272	0.543728	-6.152	NonSig	NonSwitched	Multi-promoter
200	ENSG00000050820	BCAR1	chr16	75251628	-	FALSE	1	KC-PB.1814.1	3.13115	3.13115	4.10623	4.10623	Major	Major	4.38121	3.01687	3.36982	1.75672	4.09253	4.09286	4.92644	4.37494	3.04437	4.38121	3.01687	3.36982	1.75672	4.09253	4.09286	4.92644	4.37494	3.04437	0.975076	3.67286	1.78234	0.110993	0.295273	-5.24763	NonSig	NonSwitched	Single-promoter
201	ENSG00000051009	FHIP1B	chr11	6234667	-	FALSE	1	KC-PB.732.1	5.14565	5.14565	4.89527	4.89527	Major	Major	5.14026	5.60382	5.13905	4.69946	4.36658	5.26611	5.10142	5.0716	4.67063	5.14026	5.60382	5.13905	4.69946	4.36658	5.26611	5.10142	5.0716	4.67063	-0.250379	5.00655	-1.02514	0.334091	0.553445	-6.18405	NonSig	NonSwitched	Single-promoter
202	ENSG00000051382	PIK3CB	chr3	138834918	-	FALSE	1	KC-PB.3121.1	5.18973	5.18973	4.56484	4.56484	Major	Major	4.25061	4.87658	5.47817	6.15358	3.65521	4.71386	4.57737	5.10797	4.76981	4.25061	4.87658	5.47817	6.15358	3.65521	4.71386	4.57737	5.10797	4.76981	-0.624891	4.84257	-1.47358	0.177282	0.384057	-5.66637	NonSig	NonSwitched	Single-promoter
203	ENSG00000052723	SIKE1	chr1	114780657	-	FALSE	1	KC-PB.262.1,KC-PB.262.2,KC-PB.262.3	3.99967	3.99967	4.37999	4.37999	Major	Major	3.03811	3.82525	4.57441	4.56091	4.30279	4.8348	4.31851	4.48966	3.95417	3.03811	3.82525	4.57441	4.56091	4.30279	4.8348	4.31851	4.48966	3.95417	0.380319	4.21096	1.11276	0.296833	0.521106	-6.09328	NonSig	NonSwitched	Single-promoter
204	ENSG00000052749	RRP12	chr10	97401334	-	FALSE	1	KC-PB.644.1	1.09893	1.09893	1.85404	1.85404	Major	Major	2.20385	0	0	2.19185	2.6675	1.7202	2.09346	0.894243	1.8948	2.20385	0	0	2.19185	2.6675	1.7202	2.09346	0.894243	1.8948	0.755114	1.51843	1.26136	0.241291	0.464351	-5.92711	NonSig	NonSwitched	Single-promoter
205	ENSG00000053747	LAMA3	chr18	23872848	+	FALSE	1	KC-PB.2098.1,KC-PB.2098.2,KC-PB.2098.3,KC-PB.2098.20,KC-PB.2098.19,KC-PB.2098.16,KC-PB.2098.18,KC-PB.2098.17,KC-PB.2098.15,KC-PB.2098.14,KC-PB.2098.13,KC-PB.2098.4,KC-PB.2098.11,KC-PB.2098.10,KC-PB.2098.9,KC-PB.2098.8,KC-PB.2098.7,KC-PB.2098.6,KC-PB.2098.5,KC-PB.2098.12,KC-PB.2098.21	6.23945	11.6075	6.25937	12.2329	Major	Major	6.1566	6.85198	6.49546	5.45375	6.29687	6.24724	5.85445	6.46892	6.42938	10.9667	12.8933	12.9742	9.59575	12.1351	12.1144	11.6076	12.5918	12.7153	0.0199248	6.25052	0.0710279	0.945048	0.988382	-6.72726	NonSig	NonSwitched	Multi-promoter
206	ENSG00000053747	LAMA3	chr18	23914430	+	TRUE	2	KC-PB.2098.28,KC-PB.2098.29	5.36805	11.6075	5.97348	12.2329	NA	NA	4.81009	6.04133	6.47878	4.142	5.83818	5.86716	5.7532	6.1229	6.28596	10.9667	12.8933	12.9742	9.59575	12.1351	12.1144	11.6076	12.5918	12.7153	0.60543	5.7044	1.3278	0.21941	0.438697	-5.84825	NonSig	NonSwitched	Multi-promoter
207	ENSG00000053770	AP5M1	chr14	57269037	+	FALSE	1	KC-PB.1419.1,KC-PB.1419.2	5.57799	5.57799	5.8482	5.8482	Major	Major	5.34617	5.71933	6.09672	5.14973	6.10451	5.59771	6.00884	6.24224	5.28769	5.34617	5.71933	6.09672	5.14973	6.10451	5.59771	6.00884	6.24224	5.28769	0.270211	5.72811	1.01824	0.337173	0.556477	-6.19097	NonSig	NonSwitched	Single-promoter
208	ENSG00000054523	KIF1B	chr1	10210570	+	FALSE	1	KC-PB.27.1	3.99745	3.99745	3.25062	3.25062	Major	Major	4.71422	3.60263	3.85674	3.81619	3.31065	2.48275	3.24733	3.88148	3.3309	4.71422	3.60263	3.85674	3.81619	3.31065	2.48275	3.24733	3.88148	3.3309	-0.746825	3.58254	-2.34809	0.0455549	0.177964	-4.40293	NonSig	NonSwitched	Single-promoter
209	ENSG00000054983	GALC	chr14	87993150	-	FALSE	1	KC-PB.1485.2	4.60545	4.60545	4.13573	4.13573	Major	Major	5.46874	4.01806	4.04986	4.88515	3.93314	4.53501	4.06048	4.11387	4.03615	5.46874	4.01806	4.04986	4.88515	3.93314	4.53501	4.06048	4.11387	4.03615	-0.469724	4.3445	-1.48729	0.173711	0.379511	-5.64869	NonSig	NonSwitched	Single-promoter
210	ENSG00000055044	NOP58	chr2	202265750	+	FALSE	1	KC-PB.2595.1	5.98553	5.98553	6.8394	6.8394	Major	Major	5.14026	6.4453	6.41003	5.94654	6.57856	6.65022	7.46065	6.96166	6.54591	5.14026	6.4453	6.41003	5.94654	6.57856	6.65022	7.46065	6.96166	6.54591	0.853867	6.4599	2.70015	0.0260584	0.130109	-3.85288	NonSig	NonSwitched	Single-promoter
211	ENSG00000055070	SZRD1	chr1	16367236	+	FALSE	1	KC-PB.43.1,KC-PB.43.2	4.50935	4.50935	5.53083	5.53083	Major	Major	5.14026	3.82525	4.37244	4.69946	5.74525	5.32235	5.12863	5.66678	5.79114	5.14026	3.82525	4.37244	4.69946	5.74525	5.32235	5.12863	5.66678	5.79114	1.02148	5.07684	3.6987	0.00562123	0.0527328	-2.30102	NonSig	NonSwitched	Single-promoter
212	ENSG00000055130	CUL1	chr7	148698903	+	FALSE	1	KC-PB.4087.1,KC-PB.4087.2	4.05771	4.05771	4.31567	4.31567	Major	Major	3.03811	3.33927	5.22159	4.63185	4.74815	3.95734	4.36501	4.1837	4.32416	3.03811	3.33927	5.22159	4.63185	4.74815	3.95734	4.36501	4.1837	4.32416	0.257964	4.20102	0.575101	0.580393	0.757451	-6.55102	NonSig	NonSwitched	Single-promoter
213	ENSG00000055211	GINM1	chr6	149566396	+	FALSE	1	KC-PB.3869.1	6.25592	6.25592	5.82682	5.82682	Major	Major	6.00279	6.34095	6.07468	6.60527	5.88249	5.95872	5.85445	5.84975	5.58869	6.00279	6.34095	6.07468	6.60527	5.88249	5.95872	5.85445	5.84975	5.58869	-0.429102	6.01753	-2.72208	0.025171	0.127833	-3.8184	NonSig	NonSwitched	Single-promoter
214	ENSG00000055332	EIF2AK2	chr2	37156979	-	FALSE	1	KC-PB.2363.1	2.01672	2.01672	2.68358	2.68358	Major	Major	0	3.92487	0	4.142	2.19183	2.48275	3.14445	2.40413	3.19474	0	3.92487	0	4.142	2.19183	2.48275	3.14445	2.40413	3.19474	0.666862	2.3872	0.690819	0.508435	0.700033	-6.47393	NonSig	NonSwitched	Single-promoter
215	ENSG00000055483	USP36	chr17	78840795	-	FALSE	1	KC-PB.2058.1	4.55008	4.55008	4.4368	4.4368	Major	Major	5.40876	3.33927	4.51018	4.94209	5.5113	4.15612	3.81464	4.31397	4.38799	5.40876	3.33927	4.51018	4.94209	5.5113	4.15612	3.81464	4.31397	4.38799	-0.113271	4.48715	-0.239377	0.816588	0.915186	-6.69852	NonSig	NonSwitched	Single-promoter
216	ENSG00000055917	PUM2	chr2	20350848	-	FALSE	1	KC-PB.2338.1	6.71932	6.71932	5.87459	5.87459	Major	Major	6.92881	6.39407	6.84706	6.70734	5.92549	5.82884	5.87065	5.73814	6.00981	6.92881	6.39407	6.84706	6.70734	5.92549	5.82884	5.87065	5.73814	6.00981	-0.844736	6.25002	-6.03044	0.000264233	0.0107971	0.83696	NonSig	NonSwitched	Single-promoter
217	ENSG00000056097	ZFR	chr5	32444698	-	FALSE	1	KC-PB.3450.2	4.97869	4.97869	5.06666	5.06666	Major	Major	4.71422	4.92551	5.57555	4.69946	4.79527	4.94638	5.2326	5.21189	5.14718	4.71422	4.92551	5.57555	4.69946	4.79527	4.94638	5.2326	5.21189	5.14718	0.0879787	5.02756	0.421924	0.683739	0.83644	-6.63281	NonSig	NonSwitched	Single-promoter
218	ENSG00000056972	TRAF3IP2	chr6	111605878	-	FALSE	1	KC-PB.3822.1	6.1061	6.1061	6.43762	6.43762	Major	Major	6.00279	5.80027	6.37439	6.24693	6.56503	6.66116	6.08026	6.32183	6.55983	6.00279	5.80027	6.37439	6.24693	6.56503	6.66116	6.08026	6.32183	6.55983	0.331525	6.29028	1.88373	0.0948246	0.267117	-5.10216	NonSig	NonSwitched	Single-promoter
219	ENSG00000057019	DCBLD2	chr3	98822349	-	TRUE	2	KC-PB.3046.4	3.74708	10.141	4.49916	10.0862	NA	NA	2.68046	5.44508	3.04658	3.81619	3.93314	5.01625	4.8951	3.88148	4.76981	9.27423	12.0187	9.50848	9.76273	8.98276	11.2635	10.4817	9.19032	10.5129	0.752077	4.1649	1.33661	0.216641	0.436269	-5.8376	NonSig	NonSwitched	Multi-promoter
220	ENSG00000057019	DCBLD2	chr3	98901693	-	FALSE	1	KC-PB.3046.5,KC-PB.3046.6,KC-PB.3046.7,KC-PB.3046.8,KC-PB.3046.9,KC-PB.3046.10,KC-PB.3046.11	6.39396	10.141	5.58709	10.0862	Major	Major	6.59376	6.57365	6.4619	5.94654	5.04962	6.24724	5.58661	5.30883	5.74313	9.27423	12.0187	9.50848	9.76273	8.98276	11.2635	10.4817	9.19032	10.5129	-0.806874	5.9457	-3.09607	0.014013	0.0893354	-3.23067	NonSig	NonSwitched	Multi-promoter
221	ENSG00000057252	SOAT1	chr1	179293802	+	FALSE	1	KC-PB.370.4,KC-PB.370.3,KC-PB.370.2,KC-PB.370.1	0.800379	0.800379	2.75692	2.75692	Major	Major	0	1.00966	0	2.19185	3.54925	2.02139	2.47892	2.40413	3.3309	0	1.00966	0	2.19185	3.54925	2.02139	2.47892	2.40413	3.3309	1.95654	1.88734	3.72472	0.00540939	0.0514181	-2.2617	NonSig	NonSwitched	Single-promoter
222	ENSG00000057294	PKP2	chr12	32896839	-	FALSE	1	KC-PB.1012.1,KC-PB.1012.2,KC-PB.1012.3,KC-PB.1012.4	0.510005	0.510005	2.1816	2.1816	Major	Major	0	0	2.04002	0	2.44918	2.66779	1.5659	0.894243	3.3309	0	0	2.04002	0	2.44918	2.66779	1.5659	0.894243	3.3309	1.6716	1.43867	2.7321	0.0247755	0.126548	-3.80263	NonSig	NonSwitched	Single-promoter
223	ENSG00000058056	USP13	chr3	179653101	+	FALSE	1	KC-PB.3174.1	4.92616	4.92616	4.04778	4.04778	Major	Major	4.38121	5.51069	5.18091	4.63185	5.04962	3.80776	4.00283	3.70276	3.67594	4.38121	5.51069	5.18091	4.63185	5.04962	3.80776	4.00283	3.70276	3.67594	-0.878384	4.43817	-2.51241	0.0350873	0.151562	-4.14729	NonSig	NonSwitched	Single-promoter
224	ENSG00000058085	LAMC2	chr1	183186262	+	FALSE	1	KC-PB.377.1,KC-PB.377.5,KC-PB.377.2,KC-PB.377.3,KC-PB.377.16,KC-PB.377.19,KC-PB.377.18,KC-PB.377.14,KC-PB.377.6,KC-PB.377.13,KC-PB.377.7,KC-PB.377.11,KC-PB.377.9,KC-PB.377.12,KC-PB.377.8	5.50905	45.0568	6.29517	51.0297	Minor	Minor	5.63504	5.01866	5.78005	5.60246	6.04727	6.38566	6.05211	6.57667	6.41413	43.0883	45.6698	47.7509	43.7183	48.8436	50.5595	50.5247	51.2275	53.9934	0.786115	5.94578	3.99863	0.00363102	0.0417743	-1.85288	NonSig	NonSwitched	Multi-promoter
225	ENSG00000058085	LAMC2	chr1	183215557	+	TRUE	2	KC-PB.377.23	5.54931	45.0568	6.23441	51.0297	NA	NA	5.46874	5.77379	5.66676	5.28793	5.39375	6.27601	6.4256	6.39725	6.67946	43.0883	45.6698	47.7509	43.7183	48.8436	50.5595	50.5247	51.2275	53.9934	0.685105	5.92992	2.62352	0.0294179	0.139504	-3.97325	NonSig	NonSwitched	Multi-promoter
226	ENSG00000058085	LAMC2	chr1	183218390	+	TRUE	3	KC-PB.377.24	5.33921	45.0568	6.05323	51.0297	NA	NA	5.58171	6.22846	5.13905	4.40762	5.74525	6.12607	6.23848	6.0869	6.06943	43.0883	45.6698	47.7509	43.7183	48.8436	50.5595	50.5247	51.2275	53.9934	0.714018	5.73588	2.14788	0.0625881	0.214733	-4.70974	NonSig	NonSwitched	Multi-promoter
227	ENSG00000058085	LAMC2	chr1	183222144	+	TRUE	4	KC-PB.377.25	5.98918	45.0568	6.44589	51.0297	NA	NA	6.08174	6.06336	6.31923	5.49239	6.28041	6.3724	6.33507	6.38248	6.85912	43.0883	45.6698	47.7509	43.7183	48.8436	50.5595	50.5247	51.2275	53.9934	0.456714	6.24291	2.27747	0.0509625	0.189855	-4.51184	NonSig	NonSwitched	Multi-promoter
228	ENSG00000058085	LAMC2	chr1	183226699	+	TRUE	5	KC-PB.377.26,KC-PB.377.27	3.95801	45.0568	5.471	51.0297	NA	NA	2.20385	3.82525	4.80607	4.99687	5.42405	5.23714	5.44229	4.91617	6.33537	43.0883	45.6698	47.7509	43.7183	48.8436	50.5595	50.5247	51.2275	53.9934	1.51299	4.79856	2.62485	0.0293559	0.139504	-3.97116	NonSig	NonSwitched	Multi-promoter
229	ENSG00000058085	LAMC2	chr1	183227982	+	TRUE	6	KC-PB.377.28,KC-PB.377.29,KC-PB.377.30	5.58638	45.0568	6.29485	51.0297	NA	NA	5.46874	5.85181	6.13981	4.88515	6.10451	6.06144	6.22593	6.45487	6.62751	43.0883	45.6698	47.7509	43.7183	48.8436	50.5595	50.5247	51.2275	53.9934	0.708472	5.97998	2.70716	0.0257712	0.129512	-3.84185	NonSig	NonSwitched	Multi-promoter
230	ENSG00000058085	LAMC2	chr1	183230965	+	TRUE	7	KC-PB.377.32,KC-PB.377.33	6.87739	45.0568	7.11685	51.0297	NA	NA	6.81787	6.88946	7.23267	6.56958	6.91357	7.02541	6.80023	7.26526	7.57976	43.0883	45.6698	47.7509	43.7183	48.8436	50.5595	50.5247	51.2275	53.9934	0.239453	7.01042	1.17741	0.271517	0.495501	-6.0228	NonSig	NonSwitched	Multi-promoter
231	ENSG00000058085	LAMC2	chr1	183232266	+	TRUE	8	KC-PB.377.34	6.24828	45.0568	7.11831	51.0297	NA	NA	5.8306	6.01896	6.6673	6.47627	6.93477	7.07536	7.00496	7.14788	7.4286	43.0883	45.6698	47.7509	43.7183	48.8436	50.5595	50.5247	51.2275	53.9934	0.870029	6.73163	4.30836	0.00234358	0.0350795	-1.4028	NonSig	NonSwitched	Multi-promoter
232	ENSG00000058262	SEC61A1	chr3	128052441	+	FALSE	1	KC-PB.3098.1	6.61846	6.61846	7.09897	7.09897	Major	Major	6.53886	6.70558	6.69645	6.53298	7.23737	7.09163	7.0412	6.84798	7.27668	6.53886	6.70558	6.69645	6.53298	7.23737	7.09163	7.0412	6.84798	7.27668	0.480509	6.88541	3.77416	0.00502995	0.0495332	-2.1872	NonSig	NonSwitched	Single-promoter
233	ENSG00000058600	POLR3E	chr16	22297411	+	FALSE	1	KC-PB.1719.1,KC-PB.1719.2,KC-PB.1719.3	6.03792	6.03792	5.78907	5.78907	Major	Major	6.1566	5.37635	6.24223	6.37652	5.86051	5.97636	5.90253	5.51251	5.69346	6.1566	5.37635	6.24223	6.37652	5.86051	5.97636	5.90253	5.51251	5.69346	-0.248849	5.89967	-1.12776	0.290797	0.515088	-6.07718	NonSig	NonSwitched	Single-promoter
234	ENSG00000058673	ZC3H11A	chr1	203795637	+	FALSE	1	KC-PB.416.1,KC-PB.416.2	4.74721	4.74721	3.99313	3.99313	Major	Major	5.58171	4.41067	4.51018	4.4863	3.17471	4.02669	3.94279	4.43344	4.38799	5.58171	4.41067	4.51018	4.4863	3.17471	4.02669	3.94279	4.43344	4.38799	-0.754088	4.32828	-2.23391	0.0546109	0.198916	-4.57868	NonSig	NonSwitched	Single-promoter
235	ENSG00000058729	RIOK2	chr5	97183242	-	FALSE	1	KC-PB.3547.1	1.49216	1.49216	3.66378	3.66378	Major	Major	0	3.33927	2.62936	0	3.93314	3.34756	3.88013	3.70276	3.45531	0	3.33927	2.62936	0	3.93314	3.34756	3.88013	3.70276	3.45531	2.17162	2.69861	3.02176	0.0157279	0.0948051	-3.34717	NonSig	NonSwitched	Single-promoter
236	ENSG00000058804	NDC1	chr1	53838554	-	FALSE	1	KC-PB.153.2,KC-PB.153.3,KC-PB.153.1	3.33104	3.33104	4.12123	4.12123	Major	Major	2.68046	3.71823	2.36458	4.56091	4.36658	3.72672	5.2326	3.60434	3.67594	2.68046	3.71823	2.36458	4.56091	4.36658	3.72672	5.2326	3.60434	3.67594	0.79019	3.77004	1.50799	0.16844	0.372829	-5.62181	NonSig	NonSwitched	Single-promoter
237	ENSG00000059122	FLYWCH1	chr16	2911994	+	FALSE	1	KC-PB.1679.1	3.90272	3.90272	2.89916	2.89916	Major	Major	5.21221	2.33736	4.37244	3.6889	3.65521	3.72672	2.09346	3.1256	1.8948	5.21221	2.33736	4.37244	3.6889	3.65521	3.72672	2.09346	3.1256	1.8948	-1.00357	3.34519	-1.57256	0.152905	0.352414	-5.53665	NonSig	NonSwitched	Single-promoter
238	ENSG00000059378	PARP12	chr7	140063005	-	FALSE	1	KC-PB.4080.1	3.04468	3.04468	3.58737	3.58737	Major	Major	3.56331	2.01447	2.04002	4.56091	2.85709	4.02669	3.67398	3.60434	3.77476	3.56331	2.01447	2.04002	4.56091	2.85709	4.02669	3.67398	3.60434	3.77476	0.542695	3.34617	0.990811	0.349631	0.569274	-6.21806	NonSig	NonSwitched	Single-promoter
239	ENSG00000059573	ALDH18A1	chr10	95656677	-	FALSE	1	KC-PB.641.1	6.01993	6.01993	5.96643	5.96643	Major	Major	6.11966	6.01896	6.37439	5.56669	5.88249	6.011	5.9182	6.35247	5.66798	6.11966	6.01896	6.37439	5.56669	5.88249	6.011	5.9182	6.35247	5.66798	-0.053498	5.9902	-0.266628	0.796225	0.903185	-6.69097	NonSig	NonSwitched	Single-promoter
240	ENSG00000059758	CDK17	chr12	96400571	-	FALSE	1	KC-PB.1140.3,KC-PB.1140.2,KC-PB.1140.1	4.79465	4.79465	4.95925	4.95925	Major	Major	3.56331	4.60343	5.4094	5.60246	4.96972	5.11508	5.07369	4.64626	4.9915	3.56331	4.60343	5.4094	5.60246	4.96972	5.11508	5.07369	4.64626	4.9915	0.164605	4.88609	0.418007	0.686491	0.83836	-6.63459	NonSig	NonSwitched	Single-promoter
241	ENSG00000059804	SLC2A3	chr12	7936187	-	FALSE	1	KC-PB.975.1	1.26276	1.26276	1.97494	1.97494	Major	Major	0	1.00966	0	4.04136	3.43488	0.819616	3.24733	1.44216	0.930726	0	1.00966	0	4.04136	3.43488	0.819616	3.24733	1.44216	0.930726	0.712185	1.65841	0.731302	0.484619	0.681242	-6.44399	NonSig	NonSwitched	Single-promoter
242	ENSG00000060069	CTDP1	chr18	79679811	+	FALSE	1	KC-PB.2161.1	0	0	0	0	Inactive	Inactive	0	0	0	0	0	0	0	0	0	0	0	0	0	0	0	0	0	0	0	0	0	1	1	-6.73005	NonSig	NonSwitched	Single-promoter
243	ENSG00000060138	YBX3	chr12	10723325	-	FALSE	1	KC-PB.981.2,KC-PB.981.1	8.84173	8.84173	9.05687	9.05687	Major	Major	8.76105	8.64126	8.74299	9.22161	9.12114	8.98912	8.77981	9.0543	9.33997	8.76105	8.64126	8.74299	9.22161	9.12114	8.98912	8.77981	9.0543	9.33997	0.215138	8.96125	1.28166	0.234421	0.457779	-5.9033	NonSig	NonSwitched	Single-promoter
244	ENSG00000060688	SNRNP40	chr1	31296787	-	FALSE	1	KC-PB.91.1	5.10186	5.10186	6.13792	6.13792	Major	Major	5.21221	5.06307	5.72452	4.40762	6.37649	6.14178	6.05211	5.78382	6.33537	5.21221	5.06307	5.72452	4.40762	6.37649	6.14178	6.05211	5.78382	6.33537	1.03606	5.67744	3.96204	0.00382723	0.0426514	-1.90692	UpReg	NonSwitched	Single-promoter
245	ENSG00000060749	QSER1	chr11	32893061	+	FALSE	1	KC-PB.772.1	5.25806	5.25806	5.32275	5.32275	Major	Major	5.34617	5.54241	5.44419	4.69946	5.36281	4.98174	5.50592	4.99598	5.76733	5.34617	5.54241	5.44419	4.69946	5.36281	4.98174	5.50592	4.99598	5.76733	0.0646951	5.294	0.272241	0.792051	0.900588	-6.68931	NonSig	NonSwitched	Single-promoter
246	ENSG00000060982	BCAT1	chr12	24949135	-	FALSE	1	KC-PB.993.1,KC-PB.993.2,KC-PB.993.4	0	0	0.163923	0.163923	Inactive	Inactive	0	0	0	0	0	0.819616	0	0	0	0	0	0	0	0	0.819616	0	0	0	0.163923	0.0910685	0.847649	0.420277	0.627503	-6.34975	NonSig	NonSwitched	Single-promoter
247	ENSG00000061273	HDAC7	chr12	47819961	-	FALSE	1	KC-PB.1032.1,KC-PB.1032.2,KC-PB.1032.3	4.80408	4.80408	3.48614	3.48614	Major	Major	5.06452	4.54199	5.37374	4.23608	3.02462	2.97901	3.81464	3.49871	4.11372	5.06452	4.54199	5.37374	4.23608	3.02462	2.97901	3.81464	3.49871	4.11372	-1.31794	4.07189	-4.10476	0.00312025	0.040045	-1.69713	DownReg	NonSwitched	Single-promoter
248	ENSG00000061676	NCKAP1	chr2	183038328	-	FALSE	1	KC-PB.2569.2,KC-PB.2569.1	6.80653	6.80653	6.68618	6.68618	Major	Major	6.95001	6.5109	7.10801	6.65721	6.97625	6.91085	6.28758	6.58959	6.66664	6.95001	6.5109	7.10801	6.65721	6.97625	6.91085	6.28758	6.58959	6.66664	-0.120348	6.73967	-0.628251	0.546644	0.732456	-6.5172	NonSig	NonSwitched	Single-promoter
249	ENSG00000061936	SFSWAP	chr12	131711090	+	FALSE	1	KC-PB.1226.1	4.45277	4.45277	4.1296	4.1296	Major	Major	4.50096	3.47695	4.63591	5.19728	3.54925	4.53501	5.04542	3.26098	4.25737	4.50096	3.47695	4.63591	5.19728	3.54925	4.53501	5.04542	3.26098	4.25737	-0.323171	4.27324	-0.713082	0.495248	0.688275	-6.45765	NonSig	NonSwitched	Single-promoter
250	ENSG00000062038	CDH3	chr16	68644901	+	FALSE	1	KC-PB.1787.1,KC-PB.1787.3,KC-PB.1787.2,KC-PB.1787.4,KC-PB.1787.5,KC-PB.1787.6,KC-PB.1787.7	5.18424	10.838	6.73359	13.5838	Minor	Minor	5.21221	4.97284	5.66676	4.88515	6.81412	6.85475	6.48995	6.62767	6.88147	10.8473	10.5463	11.7852	10.1731	13.717	14.0851	12.9265	13.1649	14.0258	1.54935	6.04499	8.35648	2.474e-05	0.00351803	3.20718	UpReg	NonSwitched	Multi-promoter
251	ENSG00000062038	CDH3	chr16	68645531	+	TRUE	2	KC-PB.1787.8	5.65371	10.838	6.85026	13.5838	NA	NA	5.63504	5.57344	6.11843	5.28793	6.90285	7.23038	6.43653	6.5372	7.14432	10.8473	10.5463	11.7852	10.1731	13.717	14.0851	12.9265	13.1649	14.0258	1.19654	6.31846	5.11315	0.000802202	0.0185184	-0.299938	UpReg	NonSwitched	Multi-promoter
252	ENSG00000062194	GPBP1	chr5	57174060	+	FALSE	1	KC-PB.3489.1,KC-PB.3489.2	5.10278	5.10278	4.63278	4.63278	Major	Major	5.58171	5.60382	5.4094	3.81619	4.48627	5.01625	4.61633	4.59593	4.44913	5.58171	5.60382	5.4094	3.81619	4.48627	5.01625	4.61633	4.59593	4.44913	-0.470002	4.84167	-1.25775	0.242531	0.465378	-5.93132	NonSig	NonSwitched	Single-promoter
253	ENSG00000062485	CS	chr12	56300364	-	FALSE	1	KC-PB.1071.1	8.36755	8.36755	8.52438	8.52438	Major	Major	8.80243	8.11195	8.19759	8.35822	8.89378	8.463	8.40463	8.36194	8.49858	8.80243	8.11195	8.19759	8.35822	8.89378	8.463	8.40463	8.36194	8.49858	0.156838	8.45468	0.856951	0.415399	0.623362	-6.34171	NonSig	NonSwitched	Single-promoter
254	ENSG00000062598	ELMO2	chr20	46406633	-	FALSE	1	KC-PB.2749.1,KC-PB.2749.3,KC-PB.2749.2	2.3992	2.3992	2.23154	2.23154	Major	Major	3.56331	0	3.5078	2.52571	2.6675	0.819616	3.03368	1.44216	3.19474	3.56331	0	3.5078	2.52571	2.6675	0.819616	3.03368	1.44216	3.19474	-0.167666	2.30606	-0.201113	0.845425	0.930146	-6.70777	NonSig	NonSwitched	Single-promoter
255	ENSG00000062650	WAPL	chr10	86521792	-	FALSE	1	KC-PB.618.1,KC-PB.618.2,KC-PB.618.3	6.51521	6.51521	5.99782	5.99782	Major	Major	6.59376	5.82627	6.63754	7.00328	6.1231	6.12607	5.88668	5.78382	6.06943	6.59376	5.82627	6.63754	7.00328	6.1231	6.12607	5.88668	5.78382	6.06943	-0.517396	6.22777	-2.24443	0.0537066	0.196832	-4.56256	NonSig	NonSwitched	Single-promoter
256	ENSG00000062725	APPBP2	chr17	60526228	-	FALSE	1	KC-PB.2014.1	5.45711	5.45711	5.15133	5.15133	Major	Major	5.46874	5.41112	6.00647	4.94209	5.59357	4.71386	5.2326	5.39967	4.81696	5.46874	5.41112	6.00647	4.94209	5.59357	4.71386	5.2326	5.39967	4.81696	-0.305777	5.28723	-1.15829	0.278816	0.503142	-6.04395	NonSig	NonSwitched	Single-promoter
257	ENSG00000062822	POLD1	chr19	50384341	+	FALSE	1	KC-PB.2301.1	4.1585	4.1585	3.60992	3.60992	Major	Major	4.71422	4.18812	4.51018	3.22149	3.75393	4.38463	2.7828	3.26098	3.86726	4.71422	4.18812	4.51018	3.22149	3.75393	4.38463	2.7828	3.26098	3.86726	-0.548583	3.85373	-1.37304	0.205496	0.421792	-5.79306	NonSig	NonSwitched	Single-promoter
258	ENSG00000063046	EIF4B	chr12	53006461	+	FALSE	1	KC-PB.1056.4,KC-PB.1056.3,KC-PB.1056.1,KC-PB.1056.2	9.37367	20.3899	7.93791	18.9322	Minor	Minor	9.72598	9.18665	9.32916	9.25289	7.69419	7.82436	8.28882	7.87902	8.00314	20.5776	20.5045	20.5263	19.9514	18.7513	18.7285	19.1798	18.9602	19.0411	-1.43576	8.57602	-8.45348	2.26761e-05	0.00341917	3.29223	DownReg	NonSwitched	Multi-promoter
259	ENSG00000063046	EIF4B	chr12	53027821	+	TRUE	2	KC-PB.1056.5	11.0163	20.3899	10.9943	18.9322	NA	NA	10.8516	11.3179	11.1971	10.6985	11.0571	10.9042	10.8909	11.0811	11.0379	20.5776	20.5045	20.5263	19.9514	18.7513	18.7285	19.1798	18.9602	19.0411	-0.0220113	11.004	-0.142879	0.889775	0.955559	-6.71879	NonSig	NonSwitched	Multi-promoter
260	ENSG00000063322	MED29	chr19	39391379	+	FALSE	1	KC-PB.2261.1,KC-PB.2261.2	5.43166	5.43166	5.10233	5.10233	Major	Major	5.21221	5.51069	5.51136	5.49239	5.33118	4.94638	4.95712	5.24494	5.03202	5.21221	5.51069	5.51136	5.49239	5.33118	4.94638	4.95712	5.24494	5.03202	-0.329334	5.2487	-2.41928	0.0406821	0.166619	-4.29251	NonSig	NonSwitched	Single-promoter
261	ENSG00000063660	GPC1	chr2	240435688	+	FALSE	1	KC-PB.2658.1	7.90718	7.90718	7.4529	7.4529	Major	Major	8.3066	7.45378	8.0416	7.82675	7.52281	7.55773	7.33781	7.49549	7.35064	8.3066	7.45378	8.0416	7.82675	7.52281	7.55773	7.33781	7.49549	7.35064	-0.454287	7.6548	-2.55304	0.0328962	0.146952	-4.08374	NonSig	NonSwitched	Single-promoter
262	ENSG00000063854	HAGH	chr16	1826548	-	FALSE	1	KC-PB.1677.1	2.22866	2.22866	1.76356	1.76356	Major	Major	4.107	3.18706	1.62059	0	1.47738	2.48275	1.20607	1.44216	2.20943	4.107	3.18706	1.62059	0	1.47738	2.48275	1.20607	1.44216	2.20943	-0.465105	1.97027	-0.599807	0.564561	0.74389	-6.53564	NonSig	NonSwitched	Single-promoter
263	ENSG00000064115	TM7SF3	chr12	27014408	-	FALSE	1	KC-PB.1001.1,KC-PB.1001.2,KC-PB.1001.3,KC-PB.1001.4,KC-PB.1001.6,KC-PB.1001.7,KC-PB.1001.5	4.87135	4.87135	5.2375	5.2375	Major	Major	4.107	5.63358	5.33718	4.40762	5.4828	5.82884	5.18155	4.83169	4.86261	4.107	5.63358	5.33718	4.40762	5.4828	5.82884	5.18155	4.83169	4.86261	0.366154	5.07476	1.00299	0.344055	0.563388	-6.20609	NonSig	NonSwitched	Single-promoter
264	ENSG00000064419	TNPO3	chr7	129055113	-	FALSE	1	KC-PB.4054.2,KC-PB.4054.1	5.2278	5.2278	5.68796	5.68796	Major	Major	5.52633	4.41067	5.44419	5.53002	5.79247	5.82884	5.68152	5.95334	5.18361	5.52633	4.41067	5.44419	5.53002	5.79247	5.82884	5.68152	5.95334	5.18361	0.460154	5.48344	1.67078	0.131743	0.324042	-5.40352	NonSig	NonSwitched	Single-promoter
265	ENSG00000064607	SUGP2	chr19	19033516	-	FALSE	1	KC-PB.2233.2,KC-PB.2233.3	1.4027	1.4027	2.10751	2.10751	Major	Major	1.48725	1.59783	0	2.52571	1.87839	2.27043	1.85366	3.60434	0.930726	1.48725	1.59783	0	2.52571	1.87839	2.27043	1.85366	3.60434	0.930726	0.704813	1.79426	1.13128	0.289396	0.514144	-6.07339	NonSig	NonSwitched	Single-promoter
266	ENSG00000064652	SNX24	chr5	122845615	+	FALSE	1	KC-PB.3570.1	2.7665	2.7665	3.61936	3.61936	Major	Major	2.68046	2.82388	3.36982	2.19185	3.84631	3.45209	3.51811	3.60434	3.67594	2.68046	2.82388	3.36982	2.19185	3.84631	3.45209	3.51811	3.60434	3.67594	0.852855	3.24031	3.75986	0.00513671	0.0497548	-2.20872	NonSig	NonSwitched	Single-promoter
267	ENSG00000064726	BTBD1	chr15	83067251	-	FALSE	1	KC-PB.1633.1	4.68796	4.68796	5.77642	5.77642	Major	Major	4.107	5.41112	4.9093	4.3244	5.59357	5.97636	5.83806	5.80613	5.66798	4.107	5.41112	4.9093	4.3244	5.59357	5.97636	5.83806	5.80613	5.66798	1.08846	5.29266	4.13086	0.00300683	0.0392517	-1.65908	UpReg	NonSwitched	Single-promoter
268	ENSG00000064763	FAR2	chr12	29149282	+	FALSE	1	KC-PB.1005.1	0	0	0.404278	0.404278	Inactive	Major	0	0	0	0	0	2.02139	0	0	0	0	0	0	0	0	2.02139	0	0	0	0.404278	0.224599	0.94076	0.373256	0.587656	-6.26599	NonSig	NonSwitched	Single-promoter
269	ENSG00000064933	PMS1	chr2	189784543	+	FALSE	1	KC-PB.2572.1	3.34234	3.34234	3.16247	3.16247	Major	Major	3.03811	3.18706	3.74954	3.39467	2.85709	3.64086	3.14445	3.1256	3.04437	3.03811	3.18706	3.74954	3.39467	2.85709	3.64086	3.14445	3.1256	3.04437	-0.17987	3.24242	-0.877563	0.404735	0.615321	-6.32362	NonSig	NonSwitched	Single-promoter
270	ENSG00000065135	GNAI3	chr1	109548615	+	FALSE	1	KC-PB.241.2,KC-PB.241.1,KC-PB.241.3	6.8081	6.8081	7.34052	7.34052	Major	Major	6.86327	6.86458	6.52827	6.97627	7.24588	7.13938	7.37236	7.2409	7.7041	6.86327	6.86458	6.52827	6.97627	7.24588	7.13938	7.37236	7.2409	7.7041	0.532424	7.10389	3.37504	0.00913135	0.0701324	-2.79632	NonSig	NonSwitched	Single-promoter
271	ENSG00000065150	IPO5	chr13	97976465	+	FALSE	1	KC-PB.1325.1,KC-PB.1325.2,KC-PB.1325.3,KC-PB.1325.4,KC-PB.1325.5,KC-PB.1325.6	6.59104	12.9508	7.05703	14.3452	Major	Minor	6.81787	6.58891	6.56034	6.39703	6.71958	7.25948	7.32611	6.92135	7.05864	13.5156	13.3222	12.6788	12.2868	14.0236	14.3672	14.991	14.0605	14.2838	0.465995	6.84992	2.86138	0.0202118	0.111506	-3.59923	NonSig	NonSwitched	Multi-promoter
272	ENSG00000065150	IPO5	chr13	98002520	+	TRUE	2	KC-PB.1325.7	6.3598	12.9508	7.2882	14.3452	NA	NA	6.69769	6.73332	6.11843	5.88977	7.30405	7.10773	7.66494	7.13912	7.22518	13.5156	13.3222	12.6788	12.2868	14.0236	14.3672	14.991	14.0605	14.2838	0.9284	6.87558	4.23807	0.0025852	0.0363257	-1.50373	NonSig	NonSwitched	Multi-promoter
273	ENSG00000065183	WDR3	chr1	117929748	+	FALSE	1	KC-PB.268.2,KC-PB.268.1	2.89367	6.1882	2.7676	6.55911	Minor	Minor	0	3.92487	3.5078	4.142	2.6675	2.27043	2.63885	3.38474	2.8765	2.20385	8.113	6.36081	8.07517	6.83358	5.50529	6.237	7.56844	6.65126	-0.126066	2.82363	-0.155467	0.880148	0.95057	-6.71672	NonSig	NonSwitched	Multi-promoter
274	ENSG00000065183	WDR3	chr1	117929785	+	FALSE	2	KC-PB.268.3	3.29454	6.1882	3.79151	6.55911	Major	Major	2.20385	4.18812	2.853	3.93316	4.16608	3.23485	3.59815	4.1837	3.77476	2.20385	8.113	6.36081	8.07517	6.83358	5.50529	6.237	7.56844	6.65126	0.496974	3.57063	1.16264	0.27714	0.500832	-6.03915	NonSig	NonSwitched	Multi-promoter
275	ENSG00000065243	PKN2	chr1	88684238	+	FALSE	1	KC-PB.211.1,KC-PB.211.2,KC-PB.211.3,KC-PB.211.4	8.12113	8.12113	6.6638	6.6638	Major	Major	7.89035	8.53096	8.37939	7.68382	6.15957	6.93811	7.08353	6.51028	6.62751	7.89035	8.53096	8.37939	7.68382	6.15957	6.93811	7.08353	6.51028	6.62751	-1.45733	7.3115	-5.81244	0.000340545	0.0114529	0.578125	DownReg	NonSwitched	Single-promoter
276	ENSG00000065308	TRAM2	chr6	52577036	-	FALSE	1	KC-PB.3754.1	4.91086	4.91086	3.84258	3.84258	Major	Major	4.9846	5.18865	4.9093	4.56091	3.54925	3.54956	4.36501	3.79489	3.95417	4.9846	5.18865	4.9093	4.56091	3.54925	3.54956	4.36501	3.79489	3.95417	-1.06829	4.31737	-5.07801	0.000838998	0.0189286	-0.346022	DownReg	NonSwitched	Single-promoter
277	ENSG00000065328	MCM10	chr10	13161560	+	FALSE	1	KC-PB.514.2,KC-PB.514.1,KC-PB.514.3,KC-PB.514.5,KC-PB.514.4,KC-PB.514.6	1.2016	1.2016	3.67917	3.67917	Major	Major	0	1.00966	2.04002	1.75672	3.93314	3.80776	4.00283	2.97619	3.67594	0	1.00966	2.04002	1.75672	3.93314	3.80776	4.00283	2.97619	3.67594	2.47757	2.57803	5.84881	0.000326293	0.0113723	0.621785	UpReg	NonSwitched	Single-promoter
278	ENSG00000065357	DGKA	chr12	55932068	+	FALSE	1	KC-PB.1064.1	1.2083	1.2083	1.1509	1.1509	Major	Major	2.20385	0	2.62936	0	0	2.02139	0	1.83831	1.8948	2.20385	0	2.62936	0	0	2.02139	0	1.83831	1.8948	-0.0574039	1.17641	-0.0762206	0.941039	0.986654	-6.72684	NonSig	NonSwitched	Single-promoter
279	ENSG00000065457	ADAT1	chr16	75623281	-	FALSE	1	KC-PB.1817.1	1.81544	1.81544	3.02118	3.02118	Major	Major	1.48725	2.01447	2.62936	1.13069	2.85709	3.54956	3.67398	2.14878	2.8765	1.48725	2.01447	2.62936	1.13069	2.85709	3.54956	3.67398	2.14878	2.8765	1.20574	2.4853	3.02368	0.015681	0.0948051	-3.34416	NonSig	NonSwitched	Single-promoter
280	ENSG00000065491	TBC1D22B	chr6	37257772	+	FALSE	1	KC-PB.3727.1	4.65058	4.65058	3.84089	3.84089	Major	Major	5.28074	3.47695	4.69489	5.14973	4.16608	4.02669	3.24733	4.43344	3.3309	5.28074	3.47695	4.69489	5.14973	4.16608	4.02669	3.24733	4.43344	3.3309	-0.809692	4.20075	-1.92372	0.0890825	0.25831	-5.04391	NonSig	NonSwitched	Single-promoter
281	ENSG00000065559	MAP2K4	chr17	12020848	+	FALSE	1	KC-PB.1892.1	3.25092	3.25092	4.00604	4.00604	Major	Major	3.76816	2.33736	4.37244	2.52571	4.16608	4.15612	4.92644	4.31397	2.46759	3.76816	2.33736	4.37244	2.52571	4.16608	4.15612	4.92644	4.31397	2.46759	0.755125	3.67043	1.28556	0.23312	0.456858	-5.8987	NonSig	NonSwitched	Single-promoter
282	ENSG00000065613	SLK	chr10	103967188	+	FALSE	1	KC-PB.678.1	6.34653	6.34653	7.01899	7.01899	Major	Major	5.14026	7.39418	6.35624	6.49542	7.02648	6.91085	6.84193	7.19936	7.11632	5.14026	7.39418	6.35624	6.49542	7.02648	6.91085	6.84193	7.19936	7.11632	0.672462	6.72012	1.72569	0.121119	0.30863	-5.32738	NonSig	NonSwitched	Single-promoter
283	ENSG00000065618	COL17A1	chr10	104055971	-	TRUE	3	KC-PB.679.8	10.2899	32.0034	10.2615	31.772	NA	NA	9.84675	10.6051	10.6324	10.0752	10.0823	10.1215	10.5037	10.4087	10.1912	30.6085	33.1716	32.7884	31.4451	31.3547	31.6919	32.0464	32.1374	31.6296	-0.0283854	10.2741	-0.140939	0.891261	0.956364	-6.71909	NonSig	NonSwitched	Multi-promoter
284	ENSG00000065618	COL17A1	chr10	104070517	-	TRUE	2	KC-PB.679.6	11.7535	32.0034	11.1702	31.772	NA	NA	11.5378	12.1001	11.8729	11.5031	11.0595	11.1672	11.4486	11.1021	11.0736	30.6085	33.1716	32.7884	31.4451	31.3547	31.6919	32.0464	32.1374	31.6296	-0.583269	11.4294	-3.54	0.00711899	0.0612345	-2.54253	NonSig	NonSwitched	Multi-promoter
285	ENSG00000065618	COL17A1	chr10	104085801	-	FALSE	1	KC-PB.679.1,KC-PB.679.2,KC-PB.679.3,KC-PB.679.7	9.96003	32.0034	10.3403	31.772	Minor	Minor	9.22393	10.4663	10.2831	9.86678	10.2128	10.4032	10.0942	10.6265	10.3649	30.6085	33.1716	32.7884	31.4451	31.3547	31.6919	32.0464	32.1374	31.6296	0.380275	10.1713	1.47619	0.176597	0.383742	-5.66301	NonSig	NonSwitched	Multi-promoter
286	ENSG00000065833	ME1	chr6	83431148	-	FALSE	1	KC-PB.3786.1,KC-PB.3786.2,KC-PB.3786.3	4.92175	4.92175	4.85051	4.85051	Major	Major	5.40876	4.1056	4.37244	5.80021	4.8409	4.4866	4.86306	4.64626	5.41572	5.40876	4.1056	4.37244	5.80021	4.8409	4.4866	4.86306	4.64626	5.41572	-0.0712427	4.88217	-0.189304	0.854378	0.933696	-6.7103	NonSig	NonSwitched	Single-promoter
287	ENSG00000066027	PPP2R5A	chr1	212285548	+	FALSE	1	KC-PB.433.1	5.59815	5.59815	5.16939	5.16939	Major	Major	5.28074	5.80027	5.51136	5.80021	4.92804	5.40281	5.25746	5.30883	4.9498	5.28074	5.80027	5.51136	5.80021	4.92804	5.40281	5.25746	5.30883	4.9498	-0.428759	5.35995	-2.52611	0.0343323	0.149573	-4.12587	NonSig	NonSwitched	Single-promoter
288	ENSG00000066044	ELAVL1	chr19	8005641	-	FALSE	1	KC-PB.2196.1	4.38537	4.38537	4.2167	4.2167	Major	Major	4.9846	4.41067	4.75155	3.39467	3.75393	4.15612	4.76244	4.54377	3.86726	4.9846	4.41067	4.75155	3.39467	3.75393	4.15612	4.76244	4.54377	3.86726	-0.168667	4.29167	-0.471212	0.649562	0.812376	-6.60909	NonSig	NonSwitched	Single-promoter
289	ENSG00000066117	SMARCD1	chr12	50085206	+	FALSE	1	KC-PB.1046.1,KC-PB.1046.2	5.46053	5.46053	5.08117	5.08117	Major	Major	5.68647	4.97284	5.51136	5.67143	4.96972	4.7956	5.54683	4.87455	5.21915	5.68647	4.97284	5.51136	5.67143	4.96972	4.7956	5.54683	4.87455	5.21915	-0.379359	5.24977	-1.75692	0.115434	0.301078	-5.28355	NonSig	NonSwitched	Single-promoter
290	ENSG00000066135	KDM4A	chr1	43650110	+	FALSE	1	KC-PB.129.1,KC-PB.129.2	5.1271	5.1271	4.64063	4.64063	Major	Major	4.50096	5.18865	4.95827	5.86053	4.48627	5.01625	4.83029	4.91617	3.95417	4.50096	5.18865	4.95827	5.86053	4.48627	5.01625	4.83029	4.91617	3.95417	-0.486473	4.85684	-1.53347	0.162148	0.364635	-5.58844	NonSig	NonSwitched	Single-promoter
291	ENSG00000066422	ZBTB11	chr3	101677132	-	FALSE	1	KC-PB.3057.1	4.6664	4.6664	4.71389	4.71389	Major	Major	3.76816	5.51069	3.85674	5.53002	4.48627	4.58184	5.15533	4.31397	5.03202	3.76816	5.51069	3.85674	5.53002	4.48627	4.58184	5.15533	4.31397	5.03202	0.0474849	4.69278	0.107742	0.916746	0.971173	-6.72364	NonSig	NonSwitched	Single-promoter
292	ENSG00000066557	LRRC40	chr1	70205592	-	FALSE	1	KC-PB.185.1,KC-PB.185.2	4.29227	4.29227	4.59728	4.59728	Major	Major	3.76816	4.34023	4.57441	4.4863	4.16608	5.42866	4.53732	4.1837	4.67063	3.76816	4.34023	4.57441	4.4863	4.16608	5.42866	4.53732	4.1837	4.67063	0.305004	4.46172	1.03597	0.329297	0.550894	-6.17314	NonSig	NonSwitched	Single-promoter
293	ENSG00000066654	THUMPD1	chr16	20741810	-	FALSE	1	KC-PB.1710.2,KC-PB.1710.1,KC-PB.1710.3,KC-PB.1710.4	5.22791	5.22791	5.04496	5.04496	Major	Major	5.78414	6.3228	5.78005	3.02465	5.16174	4.38463	4.92644	5.64219	5.10981	5.78414	6.3228	5.78005	3.02465	5.16174	4.38463	4.92644	5.64219	5.10981	-0.182949	5.12627	-0.284891	0.78267	0.895812	-6.68546	NonSig	NonSwitched	Single-promoter
294	ENSG00000066855	MTFR1	chr8	65644734	+	FALSE	1	KC-PB.4201.1	2.4735	2.4735	3.63059	3.63059	Major	Major	0	4.34023	1.62059	3.93316	3.54925	3.95734	3.74602	3.1256	3.77476	0	4.34023	1.62059	3.93316	3.54925	3.95734	3.74602	3.1256	3.77476	1.1571	3.11633	1.38102	0.203124	0.419098	-5.78321	NonSig	NonSwitched	Single-promoter
295	ENSG00000067064	IDI1	chr10	1048889	-	FALSE	1	KC-PB.493.1,KC-PB.493.2	2.96673	2.96673	3.75177	3.75177	Major	Major	4.25061	2.60103	1.62059	3.39467	4.59679	3.11259	3.59815	3.88148	3.56983	4.25061	2.60103	1.62059	3.39467	4.59679	3.11259	3.59815	3.88148	3.56983	0.785046	3.40286	1.49273	0.172312	0.377431	-5.64165	NonSig	NonSwitched	Single-promoter
296	ENSG00000067082	KLF6	chr10	3785231	-	FALSE	1	KC-PB.498.2,KC-PB.498.3,KC-PB.498.1,KC-PB.498.4	7.45406	7.45406	7.14197	7.14197	Major	Major	7.59975	7.33202	7.1923	7.69215	7.08454	6.94708	7.05545	7.61405	7.00876	7.59975	7.33202	7.1923	7.69215	7.08454	6.94708	7.05545	7.61405	7.00876	-0.312082	7.28068	-1.72524	0.121203	0.30863	-5.32801	NonSig	NonSwitched	Single-promoter
297	ENSG00000067167	TRAM1	chr8	70608339	-	FALSE	1	KC-PB.4205.1	7.21128	7.21128	6.8828	6.8828	Major	Major	6.62045	7.38547	7.41035	7.42885	6.91357	6.85475	6.96023	6.82631	6.85912	6.62045	7.38547	7.41035	7.42885	6.91357	6.85475	6.96023	6.82631	6.85912	-0.328485	7.02879	-1.77659	0.111984	0.296785	-5.25578	NonSig	NonSwitched	Single-promoter
298	ENSG00000067177	PHKA1	chrX	72714321	-	FALSE	1	KC-PB.4604.1	3.69062	3.69062	4.14784	4.14784	Major	Major	3.76816	3.82525	4.37244	2.79664	3.84631	4.53501	4.06048	4.1837	4.11372	3.76816	3.82525	4.37244	2.79664	3.84631	4.53501	4.06048	4.1837	4.11372	0.457223	3.94463	1.51229	0.167364	0.371397	-5.6162	NonSig	NonSwitched	Single-promoter
299	ENSG00000067248	DHX29	chr5	55307703	-	FALSE	1	KC-PB.3483.1,KC-PB.3483.2	3.84676	3.84676	4.26646	4.26646	Major	Major	5.06452	4.01806	3.5078	2.79664	4.59679	3.54956	4.45374	4.11387	4.61836	5.06452	4.01806	3.5078	2.79664	4.59679	3.54956	4.45374	4.11387	4.61836	0.419707	4.07993	0.940765	0.373254	0.587656	-6.26598	NonSig	NonSwitched	Single-promoter
300	ENSG00000067334	DNTTIP2	chr1	93879186	-	FALSE	1	KC-PB.223.1	3.39459	3.39459	4.87418	4.87418	Major	Major	3.03811	3.60263	5.18091	1.75672	5.4828	5.34967	3.94279	4.87455	4.72108	3.03811	3.60263	5.18091	1.75672	5.4828	5.34967	3.94279	4.87455	4.72108	1.47959	4.21658	2.29813	0.0493174	0.185921	-4.48004	NonSig	NonSwitched	Single-promoter
301	ENSG00000067369	TP53BP1	chr15	43493156	-	FALSE	1	KC-PB.1558.1	1.58534	1.58534	2.23109	2.23109	Major	Major	3.32448	3.01687	0	0	1.87839	2.66779	2.09346	2.62101	1.8948	3.32448	3.01687	0	0	1.87839	2.66779	2.09346	2.62101	1.8948	0.645754	1.94409	0.844043	0.422178	0.629813	-6.35285	NonSig	NonSwitched	Single-promoter
302	ENSG00000067533	RRP15	chr1	218285293	+	FALSE	1	KC-PB.439.1	2.66612	2.66612	3.88376	3.88376	Major	Major	2.20385	1.59783	3.04658	3.81619	4.16608	3.80776	3.51811	4.59593	3.3309	2.20385	1.59783	3.04658	3.81619	4.16608	3.80776	3.51811	4.59593	3.3309	1.21764	3.34258	2.61846	0.0296548	0.139504	-3.98119	NonSig	NonSwitched	Single-promoter
303	ENSG00000067596	DHX8	chr17	43483984	+	FALSE	1	KC-PB.1973.1	5.14834	5.14834	4.81187	4.81187	Major	Major	4.50096	5.18865	5.37374	5.53002	4.64903	4.8348	4.79676	4.91617	4.86261	4.50096	5.18865	5.37374	5.53002	4.64903	4.8348	4.79676	4.91617	4.86261	-0.336468	4.96142	-1.60594	0.145389	0.341837	-5.49187	NonSig	NonSwitched	Single-promoter
304	ENSG00000067704	IARS2	chr1	220094135	+	FALSE	1	KC-PB.443.1	5.71804	5.71804	5.75633	5.75633	Major	Major	6.5106	5.01866	5.05149	6.29143	6.0666	5.94087	5.56686	5.59171	5.61561	6.5106	5.01866	5.05149	6.29143	6.0666	5.94087	5.56686	5.59171	5.61561	0.038285	5.73931	0.109682	0.915253	0.970494	-6.72341	NonSig	NonSwitched	Single-promoter
305	ENSG00000067992	PDK3	chrX	24465290	+	FALSE	1	KC-PB.4566.1	4.18955	4.18955	3.90542	3.90542	Major	Major	3.94751	4.60343	3.5078	4.69946	3.54925	3.64086	3.43338	4.64626	4.25737	3.94751	4.60343	3.5078	4.69946	3.54925	3.64086	3.43338	4.64626	4.25737	-0.284128	4.0317	-0.824348	0.432668	0.639558	-6.36957	NonSig	NonSwitched	Single-promoter
306	ENSG00000068097	HEATR6	chr17	60078927	-	FALSE	1	KC-PB.2011.1	4.1382	4.1382	4.12914	4.12914	Major	Major	4.25061	4.41067	3.74954	4.142	4.01504	4.7956	4.49613	3.38474	3.95417	4.25061	4.41067	3.74954	4.142	4.01504	4.7956	4.49613	3.38474	3.95417	-0.00906832	4.13317	-0.0311604	0.975874	1	-6.72951	NonSig	NonSwitched	Single-promoter
307	ENSG00000068305	MEF2A	chr15	99565914	+	FALSE	1	KC-PB.1659.1	5.80446	5.80446	5.44865	5.44865	Major	Major	5.78414	6.14827	5.18091	6.10454	5.5113	5.1774	5.54683	5.33975	5.66798	5.78414	6.14827	5.18091	6.10454	5.5113	5.1774	5.54683	5.33975	5.66798	-0.355812	5.60679	-1.61453	0.143511	0.33899	-5.48027	NonSig	NonSwitched	Single-promoter
308	ENSG00000068323	TFE3	chrX	49043355	-	FALSE	1	KC-PB.4586.1,KC-PB.4586.2	5.6629	5.6629	5.44911	5.44911	Major	Major	5.34617	6.10644	6.20213	4.99687	5.61999	5.72835	5.71781	5.10797	5.07144	5.34617	6.10644	6.20213	4.99687	5.61999	5.72835	5.71781	5.10797	5.07144	-0.213793	5.54413	-0.722047	0.49	0.686286	-6.45097	NonSig	NonSwitched	Single-promoter
309	ENSG00000068366	ACSL4	chrX	109733291	-	FALSE	1	KC-PB.4631.1,KC-PB.4631.2	4.74625	4.74625	4.76101	4.76101	Major	Major	4.89998	4.34023	5.33718	4.40762	5.12533	4.38463	3.74602	5.64219	4.90687	4.89998	4.34023	5.33718	4.40762	5.12533	4.38463	3.74602	5.64219	4.90687	0.0147535	4.75445	0.0372402	0.971169	1	-6.72928	NonSig	NonSwitched	Single-promoter
310	ENSG00000068400	GRIPAP1	chrX	49002263	-	FALSE	1	KC-PB.4585.1	2.47611	2.47611	2.9391	2.9391	Major	Major	3.03811	1.00966	1.62059	4.23608	0.920075	3.88449	3.81464	2.62101	3.45531	3.03811	1.00966	1.62059	4.23608	0.920075	3.88449	3.81464	2.62101	3.45531	0.462992	2.73333	0.562692	0.588437	0.763187	-6.55852	NonSig	NonSwitched	Single-promoter
311	ENSG00000068489	PRR11	chr17	59155693	+	FALSE	1	KC-PB.2006.2,KC-PB.2006.4	4.09555	4.09555	5.32275	5.32275	Major	Major	4.107	5.30417	3.74954	3.22149	4.74815	5.57474	4.86306	6.0121	5.41572	4.107	5.30417	3.74954	3.22149	4.74815	5.57474	4.86306	6.0121	5.41572	1.2272	4.77733	2.78947	0.0226324	0.12001	-3.71238	NonSig	NonSwitched	Single-promoter
312	ENSG00000069248	NUP133	chr1	229508331	-	FALSE	1	KC-PB.461.1,KC-PB.461.2,KC-PB.461.3,KC-PB.461.4	3.87765	3.87765	4.24321	4.24321	Major	Major	4.89998	3.33927	4.04986	3.22149	3.93314	4.43651	3.94279	4.64626	4.25737	4.89998	3.33927	4.04986	3.22149	3.93314	4.43651	3.94279	4.64626	4.25737	0.365566	4.08074	1.02965	0.332088	0.551814	-6.17952	NonSig	NonSwitched	Single-promoter
313	ENSG00000069275	NUCKS1	chr1	205750201	-	FALSE	1	KC-PB.415.3	7.5134	7.5134	7.86737	7.86737	Major	Major	7.28637	8.11722	7.66018	6.98984	7.81914	7.88164	7.89228	7.99037	7.7534	7.28637	8.11722	7.66018	6.98984	7.81914	7.88164	7.89228	7.99037	7.7534	0.353965	7.71005	1.60749	0.145049	0.341489	-5.48978	NonSig	NonSwitched	Single-promoter
314	ENSG00000069329	VPS35	chr16	46689176	-	FALSE	1	KC-PB.1746.2,KC-PB.1746.1,KC-PB.1746.3,KC-PB.1746.5	3.62467	3.62467	3.82377	3.82377	Major	Major	3.56331	4.26618	2.853	3.81619	4.09253	3.95734	3.59815	3.79489	3.67594	3.56331	4.26618	2.853	3.81619	4.09253	3.95734	3.59815	3.79489	3.67594	0.199097	3.73528	0.733268	0.483481	0.681058	-6.4425	NonSig	NonSwitched	Single-promoter
315	ENSG00000069345	DNAJA2	chr16	46973671	-	FALSE	1	KC-PB.1747.1,KC-PB.1747.2	7.6774	7.6774	7.61424	7.61424	Major	Major	7.45897	8.03599	7.68948	7.52516	7.61761	7.73912	7.50804	7.50234	7.7041	7.45897	8.03599	7.68948	7.52516	7.61761	7.73912	7.50804	7.50234	7.7041	-0.0631591	7.64231	-0.42831	0.679266	0.834412	-6.62988	NonSig	NonSwitched	Single-promoter
316	ENSG00000069667	RORA	chr15	60592556	-	FALSE	1	KC-PB.1590.1	8.08143	8.08143	6.92362	6.92362	Major	Major	8.04612	8.12248	7.5764	8.58073	7.09399	6.88307	6.71305	6.86932	7.05864	8.04612	8.12248	7.5764	8.58073	7.09399	6.88307	6.71305	6.86932	7.05864	-1.15781	7.4382	-5.72084	0.000379558	0.0120009	0.467284	DownReg	NonSwitched	Single-promoter
317	ENSG00000069812	HES2	chr1	6419921	-	FALSE	1	KC-PB.10.1	4.00716	4.00716	4.4565	4.4565	Major	Major	5.06452	3.33927	3.21724	4.40762	4.54259	4.58184	4.53732	4.43344	4.18733	5.06452	3.33927	3.21724	4.40762	4.54259	4.58184	4.53732	4.43344	4.18733	0.449342	4.2568	1.19843	0.26367	0.485924	-5.99927	NonSig	NonSwitched	Single-promoter
318	ENSG00000069849	ATP1B3	chr3	141876643	+	FALSE	1	KC-PB.3128.1	8.82456	8.82456	8.81325	8.81325	Major	Major	8.43995	8.92911	9.10559	8.82357	8.84423	8.78661	8.89321	8.85737	8.68483	8.43995	8.92911	9.10559	8.82357	8.84423	8.78661	8.89321	8.85737	8.68483	-0.0113043	8.81828	-0.0750729	0.941925	0.986654	-6.72693	NonSig	NonSwitched	Single-promoter
319	ENSG00000069869	NEDD4	chr15	55993593	-	FALSE	1	KC-PB.1578.1,KC-PB.1578.2	3.69045	3.69045	5.44474	5.44474	Major	Major	4.71422	3.71823	4.13751	2.19185	5.61999	5.01625	5.2073	5.73814	5.64203	4.71422	3.71823	4.13751	2.19185	5.61999	5.01625	5.2073	5.73814	5.64203	1.75429	4.66506	3.75573	0.00516798	0.0497548	-2.21494	UpReg	NonSwitched	Single-promoter
320	ENSG00000069956	MAPK6	chr15	52019238	+	FALSE	1	KC-PB.1570.1,KC-PB.1570.2	5.1948	5.1948	5.61059	5.61059	Major	Major	5.58171	5.57344	4.57441	5.04964	5.61999	5.70738	5.37572	5.76116	5.58869	5.58171	5.57344	4.57441	5.04964	5.61999	5.70738	5.37572	5.76116	5.58869	0.415786	5.42579	1.84395	0.100884	0.276017	-5.15963	NonSig	NonSwitched	Single-promoter
321	ENSG00000069966	GNB5	chr15	52179976	-	FALSE	1	KC-PB.1571.1,KC-PB.1571.2,KC-PB.1571.3,KC-PB.1571.4	3.02432	3.02432	3.27232	3.27232	Major	Major	4.38121	2.33736	2.853	2.52571	2.19183	4.09286	3.24733	3.49871	3.3309	4.38121	2.33736	2.853	2.52571	2.19183	4.09286	3.24733	3.49871	3.3309	0.248005	3.1621	0.495654	0.632926	0.798457	-6.5964	NonSig	NonSwitched	Single-promoter
322	ENSG00000069974	RAB27A	chr15	55289844	-	FALSE	1	KC-PB.1575.1	3.07994	3.07994	3.52261	3.52261	Major	Major	3.32448	1.00966	3.74954	4.23608	4.09253	3.23485	3.03368	3.38474	3.86726	3.32448	1.00966	3.74954	4.23608	4.09253	3.23485	3.03368	3.38474	3.86726	0.442672	3.32587	0.716894	0.493012	0.686778	-6.45482	NonSig	NonSwitched	Single-promoter
323	ENSG00000070018	LRP6	chr12	12267012	-	FALSE	1	KC-PB.984.1	4.92423	4.92423	4.25263	4.25263	Major	Major	4.71422	5.63358	3.85674	5.49239	4.64903	3.88449	4.36501	4.04049	4.32416	4.71422	5.63358	3.85674	5.49239	4.64903	3.88449	4.36501	4.04049	4.32416	-0.671598	4.55112	-1.82152	0.104459	0.282827	-5.19181	NonSig	NonSwitched	Single-promoter
324	ENSG00000070061	ELP1	chr9	108934087	-	FALSE	1	KC-PB.4394.2,KC-PB.4394.1	0.252416	0.252416	1.46069	1.46069	Major	Major	0	1.00966	0	0	0.920075	1.7202	1.85366	2.80951	0	0	1.00966	0	0	0.920075	1.7202	1.85366	2.80951	0	1.20827	0.923678	2.24178	0.0539333	0.197459	-4.56663	NonSig	NonSwitched	Single-promoter
325	ENSG00000070159	PTPN3	chr9	109498303	-	FALSE	1	KC-PB.4398.1	4.91429	4.91429	4.93255	4.93255	Major	Major	5.06452	4.60343	4.22014	5.76908	5.45372	5.1774	4.36501	4.99598	4.67063	5.06452	4.60343	4.22014	5.76908	5.45372	5.1774	4.36501	4.99598	4.67063	0.0182562	4.92444	0.0528363	0.959105	0.9958	-6.7285	NonSig	NonSwitched	Single-promoter
326	ENSG00000070190	DAPP1	chr4	99816830	+	FALSE	1	KC-PB.3336.2,KC-PB.3336.1	3.67816	3.67816	3.47709	3.47709	Major	Major	3.03811	4.47782	3.5078	3.6889	2.19183	3.54956	3.34335	4.43344	3.86726	3.03811	4.47782	3.5078	3.6889	2.19183	3.54956	3.34335	4.43344	3.86726	-0.20107	3.56645	-0.434246	0.675119	0.831354	-6.62711	NonSig	NonSwitched	Single-promoter
327	ENSG00000070214	SLC44A1	chr9	105244622	+	FALSE	1	KC-PB.4389.1,KC-PB.4389.2	5.58504	5.58504	5.7115	5.7115	Major	Major	5.96163	4.82593	5.26116	6.29143	5.81551	5.52767	6.02341	5.80613	5.38476	5.96163	4.82593	5.26116	6.29143	5.81551	5.52767	6.02341	5.80613	5.38476	0.126459	5.65529	0.413366	0.689756	0.840144	-6.63668	NonSig	NonSwitched	Single-promoter
328	ENSG00000070269	TMEM260	chr14	56579798	+	FALSE	1	KC-PB.1418.1,KC-PB.1418.2	1.65115	1.65115	2.41636	2.41636	Major	Major	3.56331	2.01447	1.0268	0	1.87839	2.66779	2.7828	3.26098	1.49184	3.56331	2.01447	1.0268	0	1.87839	2.66779	2.7828	3.26098	1.49184	0.765215	2.07626	1.09149	0.305565	0.529547	-6.11583	NonSig	NonSwitched	Single-promoter
329	ENSG00000070367	EXOC5	chr14	57268871	-	FALSE	1	KC-PB.1422.1,KC-PB.1422.2,KC-PB.1422.4	3.83491	3.83491	4.3478	4.3478	Major	Major	3.94751	3.82525	3.63373	3.93316	4.09253	4.58184	4.53732	3.96318	4.56413	3.94751	3.82525	3.63373	3.93316	4.09253	4.58184	4.53732	3.96318	4.56413	0.512888	4.11985	2.92645	0.0182514	0.10398	-3.49689	NonSig	NonSwitched	Single-promoter
330	ENSG00000070413	DGCR2	chr22	19122407	-	FALSE	1	KC-PB.2828.1	6.07103	6.07103	5.40686	5.40686	Major	Major	6.36035	6.01896	5.4094	6.49542	5.79247	5.5514	5.58661	4.95662	5.14718	6.36035	6.01896	5.4094	6.49542	5.79247	5.5514	5.58661	4.95662	5.14718	-0.664176	5.70205	-2.47787	0.0370661	0.156592	-4.20124	NonSig	NonSwitched	Single-promoter
331	ENSG00000070718	AP3M2	chr8	42153063	+	FALSE	1	KC-PB.4174.2,KC-PB.4174.1	0	0	2.31735	2.31735	Inactive	Major	0	0	0	0	3.17471	1.7202	0.725559	3.49871	2.46759	0	0	0	0	3.17471	1.7202	0.725559	3.49871	2.46759	2.31735	1.28742	4.37649	0.00213238	0.0336304	-1.30564	UpReg	Switched	Single-promoter
332	ENSG00000070756	PABPC1	chr8	100712782	-	TRUE	4	KC-PB.4238.11	10.7216	41.9551	11.6589	44.3806	NA	NA	10.002	11.2066	10.9897	10.6881	11.6115	11.6493	11.4343	11.6994	11.9	40.6953	42.833	42.6962	41.5959	43.9361	43.9799	44.1581	44.6281	45.2006	0.937318	11.2423	3.85787	0.00445062	0.04609	-2.06176	NonSig	NonSwitched	Multi-promoter
333	ENSG00000070756	PABPC1	chr8	100717880	-	TRUE	3	KC-PB.4238.10	9.8171	41.9551	10.896	44.3806	NA	NA	9.4822	10.0402	10.1056	9.64035	10.7136	10.6871	10.78	11.1072	11.1923	40.6953	42.833	42.6962	41.5959	43.9361	43.9799	44.1581	44.6281	45.2006	1.07894	10.4165	5.73963	0.000371174	0.0119957	0.49012	UpReg	NonSwitched	Multi-promoter
334	ENSG00000070756	PABPC1	chr8	100718278	-	TRUE	2	KC-PB.4238.3	10.1477	41.9551	10.8698	44.3806	NA	NA	9.94505	10.2287	10.3419	10.0752	10.7839	10.7097	10.6761	11.0078	11.1715	40.6953	42.833	42.6962	41.5959	43.9361	43.9799	44.1581	44.6281	45.2006	0.722066	10.5489	4.75662	0.00127493	0.0248914	-0.776339	NonSig	NonSwitched	Multi-promoter
335	ENSG00000070756	PABPC1	chr8	100722088	-	FALSE	1	KC-PB.4238.2,KC-PB.4238.1,KC-PB.4238.9,KC-PB.4238.8,KC-PB.4238.7,KC-PB.4238.6,KC-PB.4238.5,KC-PB.4238.4,KC-PB.4238.13,KC-PB.4238.12	11.2687	41.9551	10.9558	44.3806	Major	Minor	11.2661	11.3574	11.2589	11.1922	10.8271	10.9338	11.2677	10.8137	10.9368	40.6953	42.833	42.6962	41.5959	43.9361	43.9799	44.1581	44.6281	45.2006	-0.312842	11.0949	-2.43995	0.0393672	0.163112	-4.26033	NonSig	NonSwitched	Multi-promoter
336	ENSG00000070950	RAD18	chr3	8963475	-	FALSE	1	KC-PB.2915.1,KC-PB.2915.2,KC-PB.2915.3	3.02738	3.02738	3.57817	3.57817	Major	Major	4.107	3.82525	3.04658	1.13069	2.44918	4.02669	3.88013	3.49871	4.03615	4.107	3.82525	3.04658	1.13069	2.44918	4.02669	3.88013	3.49871	4.03615	0.550791	3.33338	0.875573	0.405756	0.615647	-6.32539	NonSig	NonSwitched	Single-promoter
337	ENSG00000071189	SNX13	chr7	17940503	-	FALSE	1	KC-PB.3913.1	4.96214	4.96214	4.02408	4.02408	Major	Major	4.50096	5.148	5.37374	4.82587	4.59679	3.72672	3.74602	4.37494	3.67594	4.50096	5.148	5.37374	4.82587	4.59679	3.72672	3.74602	4.37494	3.67594	-0.938061	4.441	-3.50369	0.00751781	0.0627366	-2.59816	NonSig	NonSwitched	Single-promoter
338	ENSG00000071205	ARHGAP10	chr4	147732062	+	FALSE	1	KC-PB.3386.1,KC-PB.3386.2	4.58618	4.58618	3.87683	3.87683	Major	Major	4.50096	3.71823	5.29967	4.82587	3.75393	3.34756	4.36501	3.88148	4.03615	4.50096	3.71823	5.29967	4.82587	3.75393	3.34756	4.36501	3.88148	4.03615	-0.709357	4.1921	-2.13765	0.0636089	0.215458	-4.72522	NonSig	NonSwitched	Single-promoter
339	ENSG00000071242	RPS6KA2	chr6	166627251	-	FALSE	1	KC-PB.3890.1	3.77963	3.77963	3.59644	3.59644	Major	Major	4.25061	2.60103	3.21724	5.04964	4.54259	2.48275	4.00283	3.49871	3.45531	4.25061	2.60103	3.21724	5.04964	4.54259	2.48275	4.00283	3.49871	3.45531	-0.183192	3.67786	-0.32137	0.755831	0.880418	-6.67338	NonSig	NonSwitched	Single-promoter
340	ENSG00000071462	BUD23	chr7	73683597	+	FALSE	1	KC-PB.3972.1	5.51548	5.51548	6.0317	6.0317	Major	Major	5.58171	5.54241	5.6066	5.33121	6.63145	5.86716	5.99413	5.76116	5.90461	5.58171	5.54241	5.6066	5.33121	6.63145	5.86716	5.99413	5.76116	5.90461	0.516221	5.80227	2.69381	0.0263207	0.130517	-3.86284	NonSig	NonSwitched	Single-promoter
341	ENSG00000071537	SEL1L	chr14	81533851	-	FALSE	1	KC-PB.1480.1,KC-PB.1480.2,KC-PB.1480.3	6.07691	6.07691	6.34522	6.34522	Major	Major	5.8306	6.4453	5.44419	6.58753	6.36092	6.3724	6.12147	6.38248	6.48882	5.8306	6.4453	5.44419	6.58753	6.36092	6.3724	6.12147	6.38248	6.48882	0.268308	6.22597	1.10844	0.298591	0.522388	-6.09789	NonSig	NonSwitched	Single-promoter
342	ENSG00000071894	CPSF1	chr8	144409326	-	FALSE	1	KC-PB.4279.1	4.56439	4.56439	4.80414	4.80414	Major	Major	4.81009	2.82388	5.85954	4.76405	4.79527	4.87296	4.36501	4.99598	4.9915	4.81009	2.82388	5.85954	4.76405	4.79527	4.87296	4.36501	4.99598	4.9915	0.239752	4.69759	0.451363	0.663226	0.823819	-6.61894	NonSig	NonSwitched	Single-promoter
343	ENSG00000071967	CYBRD1	chr2	171522476	+	FALSE	1	KC-PB.2539.1	7.82112	7.82112	6.49317	6.49317	Major	Major	7.42908	7.64852	8.08082	8.12606	5.88249	6.67202	6.84193	6.1229	6.94652	7.42908	7.64852	8.08082	8.12606	5.88249	6.67202	6.84193	6.1229	6.94652	-1.32795	7.08337	-4.88727	0.00107357	0.0227175	-0.599495	DownReg	NonSwitched	Single-promoter
344	ENSG00000072041	SLC6A15	chr12	84912856	-	FALSE	1	KC-PB.1122.1,KC-PB.1122.3	3.61081	3.61081	2.9821	2.9821	Major	Major	2.20385	3.71823	5.29967	3.22149	3.17471	2.97901	2.7828	2.40413	3.56983	2.20385	3.71823	5.29967	3.22149	3.17471	2.97901	2.7828	2.40413	3.56983	-0.628712	3.26153	-1.11399	0.296333	0.520948	-6.09196	NonSig	NonSwitched	Single-promoter
345	ENSG00000072042	RDH11	chr14	67695764	-	FALSE	1	KC-PB.1444.1,KC-PB.1444.2,KC-PB.1444.3,KC-PB.1444.4,KC-PB.1444.6,KC-PB.1444.7	6.55033	6.55033	6.19044	6.19044	Major	Major	6.04281	6.83927	6.69645	6.62279	6.1231	5.50355	6.25091	6.38248	6.69216	6.04281	6.83927	6.69645	6.62279	6.1231	5.50355	6.25091	6.38248	6.69216	-0.359892	6.35039	-1.36331	0.208426	0.425102	-5.80504	NonSig	NonSwitched	Single-promoter
346	ENSG00000072110	ACTN1	chr14	68890256	-	TRUE	3	KC-PB.1448.16	5.62709	17.6088	7.88372	24.2313	NA	NA	6.04281	5.94968	6.02957	4.4863	7.50166	7.92769	7.89228	8.00491	8.09207	17.8399	19.0637	19.8935	13.638	23.5362	24.2177	24.4475	24.0664	24.8889	2.25663	6.88077	6.7022	0.000125488	0.00731329	1.59222	UpReg	NonSwitched	Multi-promoter
347	ENSG00000072110	ACTN1	chr14	68893734	-	TRUE	2	KC-PB.1448.15	6.60664	17.6088	8.67232	24.2313	NA	NA	6.32833	7.31376	7.18203	5.60246	8.50478	8.61428	8.8672	8.54553	8.8298	17.8399	19.0637	19.8935	13.638	23.5362	24.2177	24.4475	24.0664	24.8889	2.06567	7.75424	6.02037	0.000267311	0.0107987	0.82516	UpReg	NonSwitched	Multi-promoter
348	ENSG00000072110	ACTN1	chr14	68979315	-	FALSE	1	KC-PB.1448.1,KC-PB.1448.2,KC-PB.1448.5,KC-PB.1448.4,KC-PB.1448.7,KC-PB.1448.8,KC-PB.1448.9,KC-PB.1448.13,KC-PB.1448.11,KC-PB.1448.12,KC-PB.1448.19,KC-PB.1448.18,KC-PB.1448.17,KC-PB.1448.20,KC-PB.1448.21	5.37506	17.6088	7.6753	24.2313	Minor	Minor	5.46874	5.80027	6.68195	3.54927	7.52979	7.67577	7.68798	7.51594	7.96702	17.8399	19.0637	19.8935	13.638	23.5362	24.2177	24.4475	24.0664	24.8889	2.30024	6.65297	4.21667	0.002664	0.0368502	-1.53461	UpReg	NonSwitched	Multi-promoter
349	ENSG00000072210	ALDH3A2	chr17	19648772	+	FALSE	1	KC-PB.1906.2,KC-PB.1906.1,KC-PB.1906.3	9.09432	9.09432	8.31857	8.31857	Major	Major	9.23261	8.91707	8.89536	9.33225	8.34374	8.47855	8.25218	8.28062	8.23778	9.23261	8.91707	8.89536	9.33225	8.34374	8.47855	8.25218	8.28062	8.23778	-0.775747	8.66335	-5.71663	0.000381463	0.0120009	0.462166	NonSig	NonSwitched	Single-promoter
350	ENSG00000072274	TFRC	chr3	196082090	-	FALSE	1	KC-PB.3207.1	4.13062	4.13062	4.56597	4.56597	Major	Major	4.107	3.92487	5.09593	3.39467	4.8409	4.38463	4.00283	4.83169	4.76981	4.107	3.92487	5.09593	3.39467	4.8409	4.38463	4.00283	4.83169	4.76981	0.435353	4.37248	1.26109	0.241384	0.464351	-5.92742	NonSig	NonSwitched	Single-promoter
351	ENSG00000072310	SREBF1	chr17	17823612	-	FALSE	2	KC-PB.1898.2	4.68048	8.32265	5.13263	9.31143	Major	Major	5.96163	4.71896	3.63373	4.40762	5.26577	5.11508	5.18155	4.59593	5.5048	9.90914	8.19592	7.38327	7.80228	9.19892	8.66464	10.0446	8.63642	10.0126	0.452142	4.93167	1.0535	0.321653	0.545291	-6.15529	NonSig	NonSwitched	Multi-promoter
352	ENSG00000072310	SREBF1	chr17	17836986	-	FALSE	1	KC-PB.1898.1	3.64217	8.32265	4.1788	9.31143	Minor	Minor	3.94751	3.47695	3.74954	3.39467	3.93314	3.54956	4.86306	4.04049	4.50777	9.90914	8.19592	7.38327	7.80228	9.19892	8.66464	10.0446	8.63642	10.0126	0.536638	3.9403	1.95226	0.0851888	0.252887	-5.00205	NonSig	NonSwitched	Multi-promoter
353	ENSG00000072415	PALS1	chr14	67241333	+	FALSE	1	KC-PB.1439.1,KC-PB.1439.2,KC-PB.1439.3	3.23428	3.23428	3.96951	3.96951	Major	Major	3.03811	3.71823	2.36458	3.81619	3.43488	4.09286	4.16929	3.96318	4.18733	3.03811	3.71823	2.36458	3.81619	3.43488	4.09286	4.16929	3.96318	4.18733	0.735228	3.64274	2.28966	0.0499855	0.187643	-4.49309	NonSig	NonSwitched	Single-promoter
354	ENSG00000072501	SMC1A	chrX	53422663	-	FALSE	1	KC-PB.4595.1,KC-PB.4595.2	5.02052	5.02052	5.20178	5.20178	Major	Major	4.107	5.34071	5.26116	5.37322	5.33118	4.98174	5.52652	5.39967	4.76981	4.107	5.34071	5.26116	5.37322	5.33118	4.98174	5.52652	5.39967	4.76981	0.181259	5.12122	0.603705	0.562086	0.742505	-6.53316	NonSig	NonSwitched	Single-promoter
355	ENSG00000072571	HMMR	chr5	163460632	+	FALSE	1	KC-PB.3653.1,KC-PB.3653.2	0	0	3.38153	3.38153	Inactive	Major	0	0	0	0	3.31065	3.45209	3.14445	4.31397	2.68648	0	0	0	0	3.31065	3.45209	3.14445	4.31397	2.68648	3.38153	1.87863	11.6041	1.94926e-06	0.00240978	5.59545	UpReg	Switched	Single-promoter
356	ENSG00000072609	CHFR	chr12	132887604	-	FALSE	1	KC-PB.1232.1	2.46694	2.46694	1.81824	1.81824	Major	Major	3.56331	0	3.5078	2.79664	0	2.66779	2.7828	2.14878	1.49184	3.56331	0	3.5078	2.79664	0	2.66779	2.7828	2.14878	1.49184	-0.648694	2.10655	-0.751748	0.472868	0.673153	-6.4283	NonSig	NonSwitched	Single-promoter
357	ENSG00000072736	NFATC3	chr16	68085372	+	FALSE	1	KC-PB.1784.1	5.75762	5.75762	5.56032	5.56032	Major	Major	6.59376	6.22846	5.44419	4.76405	5.04962	6.02801	5.73561	5.39967	5.58869	6.59376	6.22846	5.44419	4.76405	5.04962	6.02801	5.73561	5.39967	5.58869	-0.197297	5.64801	-0.517159	0.618469	0.787767	-6.58474	NonSig	NonSwitched	Single-promoter
358	ENSG00000072786	STK10	chr5	172188224	-	FALSE	1	KC-PB.3663.1	4.14708	4.14708	3.0516	3.0516	Major	Major	3.76816	3.01687	3.74954	6.05377	3.54925	2.97901	2.63885	3.88148	2.20943	3.76816	3.01687	3.74954	6.05377	3.54925	2.97901	2.63885	3.88148	2.20943	-1.09548	3.53848	-1.75919	0.115032	0.300469	-5.28036	NonSig	NonSwitched	Single-promoter
359	ENSG00000072803	FBXW11	chr5	172006659	-	FALSE	1	KC-PB.3657.1,KC-PB.3657.2,KC-PB.3657.3	1.8467	1.8467	4.01793	4.01793	Major	Major	0	4.34023	3.04658	0	4.42767	3.72672	3.43338	4.11387	4.38799	0	4.34023	3.04658	0	4.42767	3.72672	3.43338	4.11387	4.38799	2.17122	3.05294	2.38467	0.0429818	0.172266	-4.34625	NonSig	NonSwitched	Single-promoter
360	ENSG00000072849	DERL2	chr17	5486178	-	FALSE	1	KC-PB.1872.1	4.88108	4.88108	4.99205	4.99205	Major	Major	4.9846	5.01866	4.63591	4.88515	5.56667	4.98174	4.45374	5.33975	4.61836	4.9846	5.01866	4.63591	4.88515	5.56667	4.98174	4.45374	5.33975	4.61836	0.110971	4.94273	0.450259	0.66399	0.82448	-6.61948	NonSig	NonSwitched	Single-promoter
361	ENSG00000072864	NDE1	chr16	15650257	+	FALSE	1	KC-PB.4489.4	0	0	0	0	Inactive	Inactive	0	0	0	0	0	0	0	0	0	0	0	0	0	0	0	0	0	0	0	0	0	1	1	-6.73005	NonSig	NonSwitched	Single-promoter
362	ENSG00000073008	PVR	chr19	44643835	+	FALSE	1	KC-PB.2274.1,KC-PB.2274.2	3.72935	3.72935	2.51303	2.51303	Major	Major	3.76816	3.82525	3.5078	3.81619	2.6675	3.11259	3.14445	2.14878	1.49184	3.76816	3.82525	3.5078	3.81619	2.6675	3.11259	3.14445	2.14878	1.49184	-1.21632	3.05362	-3.54685	0.0070463	0.0608	-2.53205	NonSig	NonSwitched	Single-promoter
363	ENSG00000073060	SCARB1	chr12	124863866	-	FALSE	1	KC-PB.1222.1,KC-PB.1222.3	4.33307	4.33307	4.40056	4.40056	Major	Major	4.107	3.60263	4.85861	4.76405	4.59679	4.58184	4.22076	4.48966	4.11372	4.107	3.60263	4.85861	4.76405	4.59679	4.58184	4.22076	4.48966	4.11372	0.0674816	4.37056	0.245904	0.811697	0.912292	-6.69678	NonSig	NonSwitched	Single-promoter
364	ENSG00000073111	MCM2	chr3	127598428	+	FALSE	1	KC-PB.3096.1	4.5837	4.5837	5.27625	5.27625	Major	Major	4.38121	5.10616	4.80607	4.04136	5.45372	5.32235	5.52652	5.30883	4.76981	4.38121	5.10616	4.80607	4.04136	5.45372	5.32235	5.52652	5.30883	4.76981	0.692548	4.96845	2.76023	0.0236998	0.123662	-3.75838	NonSig	NonSwitched	Single-promoter
365	ENSG00000073282	TP63	chr3	189789660	+	FALSE	1	KC-PB.3198.1,KC-PB.3198.2,KC-PB.3198.3	9.66253	9.66253	9.76561	9.76561	Major	Major	9.38826	9.52505	10.0879	9.64893	9.71216	9.65549	9.71562	9.84777	9.89702	9.38826	9.52505	10.0879	9.64893	9.71216	9.65549	9.71562	9.84777	9.89702	0.103088	9.7198	0.645582	0.535893	0.724681	-6.50559	NonSig	NonSwitched	Single-promoter
366	ENSG00000073417	PDE8A	chr15	84981858	+	FALSE	1	KC-PB.1636.1	3.06847	3.06847	3.61812	3.61812	Major	Major	3.94751	3.01687	1.62059	3.6889	3.75393	2.97901	3.67398	4.11387	3.56983	3.94751	3.01687	1.62059	3.6889	3.75393	2.97901	3.67398	4.11387	3.56983	0.549658	3.37383	1.17033	0.2742	0.497884	-6.03066	NonSig	NonSwitched	Single-promoter
367	ENSG00000073578	SDHA	chr5	218323	+	FALSE	1	KC-PB.3429.1	4.96458	4.96458	4.3371	4.3371	Major	Major	5.14026	5.34071	5.44419	3.93316	4.48627	4.6272	4.57737	4.04049	3.95417	5.14026	5.34071	5.44419	3.93316	4.48627	4.6272	4.57737	4.04049	3.95417	-0.62748	4.61598	-1.90079	0.0923329	0.263227	-5.07736	NonSig	NonSwitched	Single-promoter
368	ENSG00000073584	SMARCE1	chr17	40647828	-	FALSE	1	KC-PB.1947.1	4.57853	4.57853	5.01936	5.01936	Major	Major	5.34617	4.66235	4.37244	3.93316	5.19726	4.71386	4.98716	5.42872	4.76981	5.34617	4.66235	4.37244	3.93316	5.19726	4.71386	4.98716	5.42872	4.76981	0.44083	4.82344	1.51643	0.166333	0.370277	-5.61079	NonSig	NonSwitched	Single-promoter
369	ENSG00000073792	IGF2BP2	chr3	185658611	-	TRUE	2	KC-PB.3188.11	3.28169	3.78531	3.95972	5.79807	NA	NA	3.32448	3.60263	4.44295	1.75672	4.42767	3.95734	3.94279	3.79489	3.67594	3.32448	5.6171	4.44295	1.75672	8.18159	3.95734	6.97647	6.19902	3.67594	0.67803	3.65838	1.41439	0.193453	0.405498	-5.74162	NonSig	NonSwitched	Multi-promoter
370	ENSG00000073792	IGF2BP2	chr3	185825036	-	FALSE	1	KC-PB.3188.2,KC-PB.3188.3,KC-PB.3188.7,KC-PB.3188.6,KC-PB.3188.12,KC-PB.3188.13	0.503617	3.78531	1.83835	5.79807	Minor	Minor	0	2.01447	0	0	3.75393	0	3.03368	2.40413	0	3.32448	5.6171	4.44295	1.75672	8.18159	3.95734	6.97647	6.19902	3.67594	1.33473	1.24513	1.46583	0.179329	0.386372	-5.67633	NonSig	NonSwitched	Multi-promoter
371	ENSG00000074410	CA12	chr15	63381859	-	FALSE	1	KC-PB.1593.1,KC-PB.1593.2,KC-PB.1593.3	7.37228	7.37228	7.33419	7.33419	Major	Major	7.99604	7.19904	7.21263	7.0814	6.85917	7.57519	7.38933	7.3738	7.47343	7.99604	7.19904	7.21263	7.0814	6.85917	7.57519	7.38933	7.3738	7.47343	-0.0380894	7.35111	-0.164602	0.873174	0.947456	-6.71511	NonSig	NonSwitched	Single-promoter
372	ENSG00000074416	MGLL	chr3	127822526	-	FALSE	2	KC-PB.3097.2	0.503617	3.21842	2.53962	5.78999	Minor	Minor	0	2.01447	0	0	2.19183	2.97901	2.91369	2.40413	2.20943	4.61153	2.01447	2.853	3.39467	6.03815	4.6992	6.34706	5.78887	6.07669	2.036	1.63473	4.5092	0.00177759	0.0309064	-1.11837	UpReg	NonSwitched	Multi-promoter
373	ENSG00000074416	MGLL	chr3	127823226	-	FALSE	1	KC-PB.3097.1	2.7148	3.21842	3.25038	5.78999	Major	Major	4.61153	0	2.853	3.39467	3.84631	1.7202	3.43338	3.38474	3.86726	4.61153	2.01447	2.853	3.39467	6.03815	4.6992	6.34706	5.78887	6.07669	0.535577	3.01234	0.600886	0.563876	0.743262	-6.53496	NonSig	NonSwitched	Multi-promoter
374	ENSG00000074590	NUAK1	chr12	106138954	-	FALSE	1	KC-PB.1163.1	6.11516	6.11516	4.41571	4.41571	Major	Major	6.39168	6.64842	6.00647	5.41405	4.16608	4.71386	3.81464	4.99598	4.38799	6.39168	6.64842	6.00647	5.41405	4.16608	4.71386	3.81464	4.99598	4.38799	-1.69945	5.17102	-5.35149	0.00059453	0.0152054	0.00764849	DownReg	NonSwitched	Single-promoter
375	ENSG00000074603	DPP8	chr15	65517689	-	FALSE	1	KC-PB.1598.1	4.37156	4.37156	3.73735	3.73735	Major	Major	5.14026	3.71823	4.22014	4.40762	4.30279	4.15612	2.7828	4.2503	3.19474	5.14026	3.71823	4.22014	4.40762	4.30279	4.15612	2.7828	4.2503	3.19474	-0.634209	4.01922	-1.53597	0.161542	0.36393	-5.58515	NonSig	NonSwitched	Single-promoter
376	ENSG00000074695	LMAN1	chr18	59359260	-	FALSE	1	KC-PB.2143.1,KC-PB.2143.2,KC-PB.2143.3	4.77427	4.77427	5.10232	5.10232	Major	Major	5.8306	4.71896	4.85861	3.6889	5.26577	5.20758	4.8951	4.99598	5.14718	5.8306	4.71896	4.85861	3.6889	5.26577	5.20758	4.8951	4.99598	5.14718	0.328055	4.95652	0.883976	0.401456	0.612721	-6.31793	NonSig	NonSwitched	Single-promoter
377	ENSG00000074696	HACD3	chr15	65530466	+	FALSE	1	KC-PB.1599.1,KC-PB.1599.2	6.02541	6.02541	5.78196	5.78196	Major	Major	6.04281	6.16874	6.02957	5.86053	5.94651	5.88594	5.32957	5.93321	5.81456	6.04281	6.16874	6.02957	5.86053	5.94651	5.88594	5.32957	5.93321	5.81456	-0.243454	5.89016	-1.52816	0.163442	0.366122	-5.59542	NonSig	NonSwitched	Single-promoter
378	ENSG00000074800	ENO1	chr1	8878686	-	FALSE	1	KC-PB.19.1	8.7554	8.7554	10.1571	10.1571	Major	Major	8.75504	8.81688	9.01012	8.43956	10.4767	10.2967	10.1164	9.90703	9.98866	8.75504	8.81688	9.01012	8.43956	10.4767	10.2967	10.1164	9.90703	9.98866	1.4017	9.53412	8.22384	2.79067e-05	0.00366251	3.08928	UpReg	NonSwitched	Single-promoter
379	ENSG00000075218	GTSE1	chr22	46296883	+	FALSE	1	KC-PB.2904.1,KC-PB.2904.2,KC-PB.2904.3	0	0	1.14396	1.14396	Inactive	Major	0	0	0	0	0.920075	1.7202	0	2.14878	0.930726	0	0	0	0	0.920075	1.7202	0	2.14878	0.930726	1.14396	0.635531	2.89187	0.0192674	0.108037	-3.55127	NonSig	NonSwitched	Single-promoter
380	ENSG00000075223	SEMA3C	chr7	80919365	-	FALSE	1	KC-PB.3982.3,KC-PB.3982.2,KC-PB.3982.1,KC-PB.3982.5	6.74636	6.74636	6.60291	6.60291	Major	Major	6.56657	6.41135	7.95377	6.05377	6.83682	6.78641	6.08026	7.07625	6.23479	6.56657	6.41135	7.95377	6.05377	6.83682	6.78641	6.08026	7.07625	6.23479	-0.143457	6.66667	-0.359129	0.728416	0.863805	-6.65939	NonSig	NonSwitched	Single-promoter
381	ENSG00000075303	SLC25A40	chr7	87876344	-	FALSE	1	KC-PB.3988.1	6.20155	6.20155	5.16407	5.16407	Major	Major	6.19262	6.06336	6.57611	5.9741	4.74815	4.71386	5.42044	5.82811	5.10981	6.19262	6.06336	6.57611	5.9741	4.74815	4.71386	5.42044	5.82811	5.10981	-1.03748	5.62517	-3.99197	0.00366588	0.0418222	-1.86269	DownReg	NonSwitched	Single-promoter
382	ENSG00000075407	ZNF37A	chr10	38094365	+	FALSE	1	KC-PB.547.1	1.38791	1.38791	0.825122	0.825122	Major	Major	0	3.18706	2.36458	0	1.47738	0	1.20607	1.44216	0	0	3.18706	2.36458	0	1.47738	0	1.20607	1.44216	0	-0.562787	1.07525	-0.747514	0.475286	0.674518	-6.43158	NonSig	NonSwitched	Single-promoter
383	ENSG00000075420	FNDC3B	chr3	172039612	+	FALSE	1	KC-PB.3168.1,KC-PB.3168.2	3.85343	3.85343	3.50442	4.14297	Major	Major	3.94751	4.60343	3.04658	3.81619	3.54925	3.72672	3.81464	2.97619	3.45531	3.94751	4.60343	3.04658	3.81619	3.54925	5.06579	5.6683	2.97619	3.45531	-0.349007	3.65953	-1.11749	0.294919	0.519286	-6.08822	NonSig	NonSwitched	Multi-promoter
384	ENSG00000075420	FNDC3B	chr3	172040537	+	FALSE	2	KC-PB.3168.3,KC-PB.3168.4	0	3.85343	0.638545	4.14297	Inactive	Minor	0	0	0	0	0	1.33906	1.85366	0	0	3.94751	4.60343	3.04658	3.81619	3.54925	5.06579	5.6683	2.97619	3.45531	0.638545	0.354747	1.5032	0.169648	0.373835	-5.62805	NonSig	NonSwitched	Multi-promoter
385	ENSG00000075618	FSCN1	chr7	5592816	+	FALSE	1	KC-PB.3902.1	6.43973	6.43973	8.07209	8.07209	Major	Major	6.26207	6.04133	6.62243	6.83309	7.97051	8.15763	8.06065	8.00491	8.16677	6.26207	6.04133	6.62243	6.83309	7.97051	8.15763	8.06065	8.00491	8.16677	1.63236	7.3466	9.34563	1.05534e-05	0.00275783	4.03046	UpReg	NonSwitched	Single-promoter
386	ENSG00000075711	DLG1	chr3	197298612	-	FALSE	1	KC-PB.3219.1	2.19463	2.19463	2.69296	2.69296	Major	Major	3.32448	2.60103	2.853	0	2.6675	2.27043	3.24733	3.38474	1.8948	3.32448	2.60103	2.853	0	2.6675	2.27043	3.24733	3.38474	1.8948	0.498332	2.47148	0.738283	0.480586	0.678238	-6.43868	NonSig	NonSwitched	Single-promoter
387	ENSG00000075790	BCAP29	chr7	107580246	+	FALSE	1	KC-PB.4028.2,KC-PB.4028.1,KC-PB.4028.3	3.54986	3.54986	3.69313	3.69313	Major	Major	4.25061	4.1056	3.04658	2.79664	3.31065	4.15612	4.16929	3.49871	3.3309	4.25061	4.1056	3.04658	2.79664	3.31065	4.15612	4.16929	3.49871	3.3309	0.143276	3.62946	0.387683	0.707951	0.851698	-6.64782	NonSig	NonSwitched	Single-promoter
388	ENSG00000075856	SART3	chr12	108561175	-	FALSE	1	KC-PB.1171.1,KC-PB.1171.2	5.74633	5.74633	5.56178	5.56178	Major	Major	5.78414	5.82627	5.37374	6.00115	5.69644	6.02801	5.32957	5.30883	5.44603	5.78414	5.82627	5.37374	6.00115	5.69644	6.02801	5.32957	5.30883	5.44603	-0.184549	5.6438	-0.927314	0.379799	0.592745	-6.27852	NonSig	NonSwitched	Single-promoter
389	ENSG00000075945	KIFAP3	chr1	170074652	-	FALSE	1	KC-PB.360.1	4.76008	4.76008	4.48489	4.48489	Major	Major	4.38121	4.82593	4.63591	5.19728	4.69944	4.21673	4.83029	4.11387	4.56413	4.38121	4.82593	4.63591	5.19728	4.69944	4.21673	4.83029	4.11387	4.56413	-0.27519	4.6072	-1.25495	0.243497	0.466342	-5.93458	NonSig	NonSwitched	Single-promoter
390	ENSG00000075975	MKRN2	chr3	12557087	+	FALSE	1	KC-PB.2923.1,KC-PB.2923.2	4.88241	4.88241	5.01575	5.01575	Major	Major	4.89998	4.97284	5.09593	4.56091	5.36281	5.37649	4.98716	4.48966	4.86261	4.89998	4.97284	5.09593	4.56091	5.36281	5.37649	4.98716	4.48966	4.86261	0.133332	4.95649	0.617299	0.553503	0.73963	-6.5244	NonSig	NonSwitched	Single-promoter
391	ENSG00000076003	MCM6	chr2	135876460	-	FALSE	1	KC-PB.2508.1,KC-PB.2508.2	3.94376	3.94376	6.61908	6.61908	Major	Major	0	4.97284	5.75255	5.04964	6.89205	6.8161	6.32334	6.39725	6.66664	0	4.97284	5.75255	5.04964	6.89205	6.8161	6.32334	6.39725	6.66664	2.67532	5.43005	2.48387	0.0367141	0.155936	-4.19187	NonSig	NonSwitched	Single-promoter
392	ENSG00000076053	RBM7	chr11	114400615	+	FALSE	1	KC-PB.920.1,KC-PB.920.2	4.53405	4.53405	4.95129	4.95129	Major	Major	5.14026	3.92487	4.51018	4.56091	5.08797	4.94638	4.61633	4.99598	5.10981	5.14026	3.92487	4.51018	4.56091	5.08797	4.94638	4.61633	4.99598	5.10981	0.417238	4.76585	1.75015	0.116645	0.303106	-5.29308	NonSig	NonSwitched	Single-promoter
393	ENSG00000076108	BAZ2A	chr12	56636348	-	FALSE	1	KC-PB.1074.1	2.301	2.301	1.72419	1.72419	Major	Major	2.68046	3.47695	3.04658	0	2.19183	0.819616	1.5659	2.14878	1.8948	2.68046	3.47695	3.04658	0	2.19183	0.819616	1.5659	2.14878	1.8948	-0.576813	1.98055	-0.837145	0.425832	0.632873	-6.35874	NonSig	NonSwitched	Single-promoter
394	ENSG00000076321	KLHL20	chr1	173714941	+	FALSE	1	KC-PB.364.1,KC-PB.364.2	2.39709	2.39709	2.99215	2.99215	Major	Major	0	2.82388	3.36982	3.39467	3.43488	3.23485	2.47892	3.1256	2.68648	0	2.82388	3.36982	3.39467	3.43488	3.23485	2.47892	3.1256	2.68648	0.595054	2.72768	0.871052	0.408082	0.617859	-6.32938	NonSig	NonSwitched	Single-promoter
395	ENSG00000076356	PLXNA2	chr1	208244373	-	FALSE	1	KC-PB.424.1	4.30688	4.30688	3.3105	3.3105	Major	Major	5.21221	4.34023	3.63373	4.04136	3.17471	3.54956	3.24733	3.1256	3.45531	5.21221	4.34023	3.63373	4.04136	3.17471	3.54956	3.24733	3.1256	3.45531	-0.99638	3.75334	-3.3555	0.00940676	0.0708496	-2.82655	NonSig	NonSwitched	Single-promoter
396	ENSG00000076382	SPAG5	chr17	28599015	-	FALSE	1	KC-PB.1917.1	2.19301	2.19301	3.86208	3.86208	Major	Major	3.56331	3.01687	0	2.19185	3.84631	3.23485	3.94279	4.2503	4.03615	3.56331	3.01687	0	2.19185	3.84631	3.23485	3.94279	4.2503	4.03615	1.66908	3.12027	2.5251	0.0343876	0.14963	-4.12746	NonSig	NonSwitched	Single-promoter
397	ENSG00000076513	ANKRD13A	chr12	109999416	+	FALSE	1	KC-PB.1179.1	5.7926	5.7926	5.25077	5.25077	Major	Major	6.36035	6.16874	4.75155	5.88977	5.12533	5.1774	5.2819	5.10797	5.56126	6.36035	6.16874	4.75155	5.88977	5.12533	5.1774	5.2819	5.10797	5.56126	-0.541831	5.49159	-1.71458	0.123201	0.310913	-5.34287	NonSig	NonSwitched	Single-promoter
398	ENSG00000076685	NT5C2	chr10	103193290	-	FALSE	1	KC-PB.676.2	3.70182	3.70182	4.09724	4.09724	Major	Major	4.89998	3.47695	3.63373	2.79664	4.23606	3.80776	3.88013	4.37494	4.18733	4.89998	3.47695	3.63373	2.79664	4.23606	3.80776	3.88013	4.37494	4.18733	0.39542	3.9215	1.03601	0.329281	0.550894	-6.1731	NonSig	NonSwitched	Single-promoter
399	ENSG00000076924	XAB2	chr19	7629547	-	FALSE	1	KC-PB.2193.1	5.76761	5.76761	5.64897	5.64897	Major	Major	6.04281	5.34071	5.37374	6.31318	5.90415	5.40281	5.2073	6.0121	5.71851	6.04281	5.34071	5.37374	6.31318	5.90415	5.40281	5.2073	6.0121	5.71851	-0.118635	5.7017	-0.443947	0.668367	0.826059	-6.62252	NonSig	NonSwitched	Single-promoter
400	ENSG00000076928	ARHGEF1	chr19	41883206	+	FALSE	1	KC-PB.2270.1	3.7586	3.7586	3.46634	3.46634	Major	Major	4.25061	3.33927	4.04986	3.39467	2.44918	2.97901	4.45374	3.1256	4.32416	4.25061	3.33927	4.04986	3.39467	2.44918	2.97901	4.45374	3.1256	4.32416	-0.292264	3.59623	-0.63813	0.5405	0.727503	-6.51062	NonSig	NonSwitched	Single-promoter
401	ENSG00000076984	MAP2K7	chr19	7903877	+	FALSE	1	KC-PB.2194.1,KC-PB.2194.2	6.22769	6.22769	5.60143	5.60143	Major	Major	6.45236	6.22846	5.983	6.24693	5.86051	5.97636	5.58661	5.10797	5.47571	6.45236	6.22846	5.983	6.24693	5.86051	5.97636	5.58661	5.10797	5.47571	-0.626253	5.87977	-3.14771	0.0129369	0.0871033	-3.14988	NonSig	NonSwitched	Single-promoter
402	ENSG00000077232	DNAJC10	chr2	182716258	+	FALSE	1	KC-PB.2563.1,KC-PB.2563.4,KC-PB.2563.3,KC-PB.2563.5,KC-PB.2563.7,KC-PB.2563.6,KC-PB.2563.8,KC-PB.2563.9	4.94327	4.94327	5.32554	5.32554	Major	Major	4.25061	5.06307	5.00563	5.45375	5.36281	5.59771	5.46381	5.21189	4.9915	4.25061	5.06307	5.00563	5.45375	5.36281	5.59771	5.46381	5.21189	4.9915	0.382278	5.15564	1.54606	0.159118	0.360401	-5.57184	NonSig	NonSwitched	Single-promoter
403	ENSG00000077238	IL4R	chr16	27313904	+	FALSE	1	KC-PB.1729.1,KC-PB.1729.2	2.7616	2.7616	4.45886	4.45886	Major	Major	3.03811	3.18706	2.62936	2.19185	4.16608	4.43651	4.76244	4.74195	4.18733	3.03811	3.18706	2.62936	2.19185	4.16608	4.43651	4.76244	4.74195	4.18733	1.69727	3.70452	7.00752	9.10352e-05	0.00610623	1.91534	UpReg	NonSwitched	Single-promoter
404	ENSG00000077254	USP33	chr1	77759851	-	FALSE	1	KC-PB.196.1	4.90681	4.90681	4.50291	4.50291	Major	Major	4.50096	5.2282	5.33718	4.56091	4.54259	4.6272	4.95712	4.43344	3.95417	4.50096	5.2282	5.33718	4.56091	4.54259	4.6272	4.95712	4.43344	3.95417	-0.403906	4.68242	-1.55065	0.158026	0.359555	-5.56577	NonSig	NonSwitched	Single-promoter
405	ENSG00000077380	DYNC1I2	chr2	171687745	+	FALSE	1	KC-PB.2540.1	6.29643	6.29643	6.23894	6.23894	Major	Major	6.22776	6.88946	6.57611	5.49239	6.04727	6.20299	6.13495	6.42635	6.38314	6.22776	6.88946	6.57611	5.49239	6.04727	6.20299	6.13495	6.42635	6.38314	-0.0574933	6.26449	-0.213728	0.835888	0.92515	-6.7049	NonSig	NonSwitched	Single-promoter
406	ENSG00000077458	FAM76B	chr11	95789579	-	FALSE	1	KC-PB.891.1	3.79897	3.79897	4.02484	4.02484	Major	Major	3.76816	4.18812	4.44295	2.79664	4.23606	4.4866	3.24733	4.04049	4.11372	3.76816	4.18812	4.44295	2.79664	4.23606	4.4866	3.24733	4.04049	4.11372	0.225871	3.92445	0.603436	0.562257	0.742505	-6.53334	NonSig	NonSwitched	Single-promoter
407	ENSG00000077514	POLD3	chr11	74592595	+	FALSE	1	KC-PB.863.1	2.93374	2.93374	4.55904	4.55904	Major	Major	3.03811	0	4.37244	4.3244	4.36658	4.71386	4.76244	4.91617	4.03615	3.03811	0	4.37244	4.3244	4.36658	4.71386	4.76244	4.91617	4.03615	1.6253	3.83668	1.92065	0.0895112	0.258521	-5.0484	NonSig	NonSwitched	Single-promoter
408	ENSG00000077549	CAPZB	chr1	19485518	-	FALSE	1	KC-PB.44.1	7.37852	7.37852	7.21866	7.21866	Major	Major	7.51694	7.437	7.17168	7.38844	7.22882	7.40332	7.1381	7.02961	7.29345	7.51694	7.437	7.17168	7.38844	7.22882	7.40332	7.1381	7.02961	7.29345	-0.15986	7.28971	-1.24931	0.245451	0.467349	-5.94113	NonSig	NonSwitched	Single-promoter
409	ENSG00000077713	SLC25A43	chrX	119399346	+	FALSE	1	KC-PB.4639.2	5.19762	5.19762	4.5382	4.5382	Major	Major	5.73613	4.1056	5.57555	5.37322	3.31065	5.14658	5.07369	4.59593	4.56413	5.73613	4.1056	5.57555	5.37322	3.31065	5.14658	5.07369	4.59593	4.56413	-0.659428	4.83128	-1.42347	0.19089	0.4025	-5.73019	NonSig	NonSwitched	Single-promoter
410	ENSG00000077942	FBLN1	chr22	45502839	+	FALSE	1	KC-PB.2899.1	1.7656	1.7656	2.60661	2.60661	Major	Major	1.48725	2.82388	1.62059	1.13069	2.85709	3.23485	1.20607	2.40413	3.3309	1.48725	2.82388	1.62059	1.13069	2.85709	3.23485	1.20607	2.40413	3.3309	0.841004	2.23283	1.65966	0.133997	0.327394	-5.4188	NonSig	NonSwitched	Single-promoter
411	ENSG00000078124	ACER3	chr11	76860889	+	FALSE	1	KC-PB.871.1,KC-PB.871.2	2.72738	2.72738	3.52449	3.52449	Major	Major	4.50096	3.18706	0	3.22149	3.31065	2.97901	4.16929	2.97619	4.18733	4.50096	3.18706	0	3.22149	3.31065	2.97901	4.16929	2.97619	4.18733	0.797119	3.17022	0.96347	0.362395	0.580321	-6.24448	NonSig	NonSwitched	Single-promoter
412	ENSG00000078140	UBE2K	chr4	39698134	+	FALSE	1	KC-PB.3264.1	6.07628	6.07628	6.24072	6.24072	Major	Major	5.58171	6.39407	5.51136	6.81796	6.34517	6.45019	6.12147	6.10501	6.18175	5.58171	6.39407	5.51136	6.81796	6.34517	6.45019	6.12147	6.10501	6.18175	0.164441	6.16763	0.585711	0.573564	0.750778	-6.54449	NonSig	NonSwitched	Single-promoter
413	ENSG00000078142	PIK3C3	chr18	41955207	+	FALSE	1	KC-PB.2123.1	3.45794	3.45794	4.18968	4.18968	Major	Major	3.03811	2.60103	3.95653	4.23608	4.09253	4.27489	3.74602	4.11387	4.72108	3.03811	2.60103	3.95653	4.23608	4.09253	4.27489	3.74602	4.11387	4.72108	0.731742	3.86446	2.02468	0.0760271	0.235843	-4.89487	NonSig	NonSwitched	Single-promoter
414	ENSG00000078237	TIGAR	chr12	4321194	+	FALSE	1	KC-PB.969.1	1.65876	1.65876	3.42483	3.42483	Major	Major	2.68046	2.82388	0	1.13069	3.02462	3.11259	3.67398	3.1256	4.18733	2.68046	2.82388	0	1.13069	3.02462	3.11259	3.67398	3.1256	4.18733	1.76607	2.63991	2.96531	0.0171754	0.100304	-3.43581	NonSig	NonSwitched	Single-promoter
415	ENSG00000078246	TULP3	chr12	2890891	+	FALSE	1	KC-PB.964.1	4.69226	4.69226	2.93958	2.93958	Major	Major	5.21221	4.60343	3.95653	4.99687	2.19183	2.48275	3.03368	3.79489	3.19474	5.21221	4.60343	3.95653	4.99687	2.19183	2.48275	3.03368	3.79489	3.19474	-1.75268	3.71855	-4.64386	0.00148179	0.0276126	-0.931065	DownReg	NonSwitched	Single-promoter
416	ENSG00000078304	PPP2R5C	chr14	101809835	+	FALSE	1	KC-PB.1503.1,KC-PB.1503.2	7.07729	7.07729	7.70771	7.70771	Major	Major	6.29558	7.2188	7.08614	7.70865	7.62415	7.60384	7.82734	7.71772	7.76547	6.29558	7.2188	7.08614	7.70865	7.62415	7.60384	7.82734	7.71772	7.76547	0.630413	7.42752	2.45646	0.0383485	0.16001	-4.23463	NonSig	NonSwitched	Single-promoter
417	ENSG00000078401	EDN1	chr6	12290361	+	FALSE	1	KC-PB.3688.1	3.41452	3.41452	2.378	2.378	Major	Major	4.50096	4.01806	5.13905	0	3.31065	2.02139	1.85366	2.80951	1.8948	4.50096	4.01806	5.13905	0	3.31065	2.02139	1.85366	2.80951	1.8948	-1.03652	2.83868	-1.05139	0.322569	0.545803	-6.15745	NonSig	NonSwitched	Single-promoter
418	ENSG00000078618	NRDC	chr1	51878763	-	FALSE	1	KC-PB.147.1,KC-PB.147.2,KC-PB.147.3,KC-PB.147.4	7.59062	7.59062	6.98946	6.98946	Major	Major	7.50266	7.35006	7.38371	8.12606	6.97625	6.61687	6.91406	7.05777	7.38233	7.50266	7.35006	7.38371	8.12606	6.97625	6.61687	6.91406	7.05777	7.38233	-0.601167	7.25664	-2.7999	0.0222635	0.118897	-3.69597	NonSig	NonSwitched	Single-promoter
419	ENSG00000078668	VDAC3	chr8	42391872	+	FALSE	1	KC-PB.4178.1	3.33465	3.33465	4.8209	4.8209	Major	Major	0	5.34071	3.95653	4.04136	3.84631	5.42866	5.01658	4.99598	4.81696	0	5.34071	3.95653	4.04136	3.84631	5.42866	5.01658	4.99598	4.81696	1.48625	4.16034	1.52678	0.163779	0.366382	-5.59723	NonSig	NonSwitched	Single-promoter
420	ENSG00000078747	ITCH	chr20	34363274	+	FALSE	1	KC-PB.2715.1,KC-PB.2715.2,KC-PB.2715.3	5.36602	5.36602	5.20516	5.20516	Major	Major	5.34617	5.148	5.05149	5.91843	5.23192	4.87296	5.2073	5.0716	5.64203	5.34617	5.148	5.05149	5.91843	5.23192	4.87296	5.2073	5.0716	5.64203	-0.160861	5.27665	-0.719139	0.491698	0.686562	-6.45315	NonSig	NonSwitched	Single-promoter
421	ENSG00000078902	TOLLIP	chr11	1309655	-	FALSE	1	KC-PB.725.1	6.23727	6.23727	5.90253	5.90253	Major	Major	6.64666	5.60382	6.22232	6.47627	5.72106	6.07787	5.7532	6.1229	5.8376	6.64666	5.60382	6.22232	6.47627	5.72106	6.07787	5.7532	6.1229	5.8376	-0.334744	6.0513	-1.50203	0.169942	0.373835	-5.62957	NonSig	NonSwitched	Single-promoter
422	ENSG00000079156	OSBPL6	chr2	178194509	+	FALSE	1	KC-PB.2559.1	3.50839	3.50839	4.1621	4.1621	Major	Major	4.107	3.18706	2.04002	4.69946	4.01504	4.58184	4.00283	3.26098	4.9498	4.107	3.18706	2.04002	4.69946	4.01504	4.58184	4.00283	3.26098	4.9498	0.653712	3.87156	1.16414	0.276566	0.500353	-6.0375	NonSig	NonSwitched	Single-promoter
423	ENSG00000079215	SLC1A3	chr5	36606606	+	FALSE	1	KC-PB.3455.1	3.56868	3.56868	2.75041	2.75041	Major	Major	2.68046	3.33927	3.36982	4.88515	2.85709	2.97901	2.63885	2.80951	2.46759	2.68046	3.33927	3.36982	4.88515	2.85709	2.97901	2.63885	2.80951	2.46759	-0.818272	3.11408	-2.05872	0.0720571	0.230777	-4.84406	NonSig	NonSwitched	Single-promoter
424	ENSG00000079246	XRCC5	chr2	216109375	+	FALSE	1	KC-PB.2615.1,KC-PB.2615.2,KC-PB.2615.3	7.26739	7.26739	7.4189	7.4189	Major	Major	7.38306	7.14841	7.3007	7.2374	7.52281	7.46083	7.40054	7.46777	7.24256	7.38306	7.14841	7.3007	7.2374	7.52281	7.46083	7.40054	7.46777	7.24256	0.151508	7.35156	1.35433	0.211157	0.429196	-5.81603	NonSig	NonSwitched	Single-promoter
425	ENSG00000079332	SAR1A	chr10	70170503	-	FALSE	1	KC-PB.593.1	5.26676	5.26676	5.41768	5.41768	Major	Major	5.34617	4.92551	5.9102	4.88515	5.83818	5.2945	5.12863	5.5394	5.28769	5.34617	4.92551	5.9102	4.88515	5.83818	5.2945	5.12863	5.5394	5.28769	0.150921	5.3506	0.607182	0.559884	0.741157	-6.53094	NonSig	NonSwitched	Single-promoter
426	ENSG00000079459	FDFT1	chr8	11802767	+	FALSE	1	KC-PB.4115.2	6.36221	6.36221	6.1565	6.1565	Major	Major	6.04281	6.66293	6.0523	6.69082	5.56667	6.59421	5.90253	6.27461	6.44447	6.04281	6.66293	6.0523	6.69082	5.56667	6.59421	5.90253	6.27461	6.44447	-0.205718	6.24793	-0.791289	0.450677	0.656621	-6.39689	NonSig	NonSwitched	Single-promoter
427	ENSG00000079785	DDX1	chr2	15591868	+	FALSE	1	KC-PB.2333.3,KC-PB.2333.2,KC-PB.2333.1	4.72567	4.72567	5.58683	5.58683	Major	Major	5.14026	4.66235	3.85674	5.24332	5.64593	5.8093	5.46381	5.5394	5.47571	5.14026	4.66235	3.85674	5.24332	5.64593	5.8093	5.46381	5.5394	5.47571	0.86116	5.20409	3.0929	0.014082	0.0895554	-3.23563	NonSig	NonSwitched	Single-promoter
428	ENSG00000079819	EPB41L2	chr6	131063291	-	FALSE	1	KC-PB.3847.2,KC-PB.3847.1	1.34536	1.34536	1.64612	1.64612	Major	Major	0	3.01687	2.36458	0	0	3.34756	2.47892	2.40413	0	0	3.01687	2.36458	0	0	3.34756	2.47892	2.40413	0	0.30076	1.51245	0.312388	0.762409	0.882664	-6.67649	NonSig	NonSwitched	Single-promoter
429	ENSG00000079950	STX7	chr6	132513107	-	FALSE	1	KC-PB.3849.1	4.65849	4.65849	4.58181	4.58181	Major	Major	5.06452	3.18706	5.13905	5.24332	4.54259	4.94638	4.53732	5.10797	3.77476	5.06452	3.18706	5.13905	5.24332	4.54259	4.94638	4.53732	5.10797	3.77476	-0.0766817	4.61589	-0.162621	0.874686	0.948599	-6.71547	NonSig	NonSwitched	Single-promoter
430	ENSG00000079974	RABL2B	chr22	50783625	-	FALSE	1	KC-PB.2910.1	0	0	1.33265	1.33265	Inactive	Major	0	0	0	0	1.47738	3.34756	0	1.83831	0	0	0	0	0	1.47738	3.34756	0	1.83831	0	1.33265	0.740361	2.02345	0.0761743	0.235888	-4.8967	NonSig	NonSwitched	Single-promoter
431	ENSG00000080802	CNOT4	chr7	135510102	-	FALSE	1	KC-PB.4073.1	4.92594	4.92594	4.53894	4.53894	Major	Major	4.81009	5.148	4.37244	5.37322	4.54259	4.58184	4.57737	4.54377	4.44913	4.81009	5.148	4.37244	5.37322	4.54259	4.58184	4.57737	4.54377	4.44913	-0.386997	4.71094	-1.94166	0.086615	0.254617	-5.01762	NonSig	NonSwitched	Single-promoter
432	ENSG00000080815	PSEN1	chr14	73136457	+	FALSE	1	KC-PB.1459.1,KC-PB.1459.2	3.41919	3.41919	3.91089	3.91089	Major	Major	3.56331	3.33927	3.74954	3.02465	3.84631	3.23485	3.34335	4.74195	4.38799	3.56331	3.33927	3.74954	3.02465	3.84631	3.23485	3.34335	4.74195	4.38799	0.491701	3.69236	1.44424	0.185144	0.395783	-5.7039	NonSig	NonSwitched	Single-promoter
433	ENSG00000080822	CLDND1	chr3	98522922	-	FALSE	1	KC-PB.3043.1	0.547963	0.547963	2.33566	2.33566	Major	Major	0	0	0	2.19185	2.19183	2.48275	2.47892	1.83831	2.68648	0	0	0	2.19185	2.19183	2.48275	2.47892	1.83831	2.68648	1.78769	1.54113	3.75993	0.00513621	0.0497548	-2.20862	UpReg	NonSwitched	Single-promoter
434	ENSG00000080824	HSP90AA1	chr14	102087044	-	FALSE	1	KC-PB.1506.1,KC-PB.1506.2,KC-PB.1506.3	4.43368	4.43368	4.9321	4.9321	Major	Major	3.76816	5.18865	4.63591	4.142	4.96972	5.1774	5.2073	4.74195	4.56413	3.76816	5.18865	4.63591	4.142	4.96972	5.1774	5.2073	4.74195	4.56413	0.49842	4.71058	1.69485	0.126985	0.316129	-5.37029	NonSig	NonSwitched	Single-promoter
435	ENSG00000080845	DLGAP4	chr20	36461468	+	FALSE	1	KC-PB.2723.1	4.53975	4.53975	4.36566	4.36566	Major	Major	4.89998	4.26618	3.74954	5.24332	4.36658	4.53501	3.94279	4.59593	4.38799	4.89998	4.26618	3.74954	5.24332	4.36658	4.53501	3.94279	4.59593	4.38799	-0.174095	4.44304	-0.568179	0.584873	0.760228	-6.55523	NonSig	NonSwitched	Single-promoter
436	ENSG00000081019	RSBN1	chr1	113812275	-	FALSE	1	KC-PB.255.1	5.51194	5.51194	5.4264	5.4264	Major	Major	6.11966	6.24782	5.44419	4.23608	5.61999	5.42866	5.30593	5.03428	5.74313	6.11966	6.24782	5.44419	4.23608	5.61999	5.42866	5.30593	5.03428	5.74313	-0.08554	5.46442	-0.212491	0.836823	0.925608	-6.70519	NonSig	NonSwitched	Single-promoter
437	ENSG00000081087	OSTM1	chr6	108074719	-	FALSE	1	KC-PB.3811.1,KC-PB.3811.2	4.20444	4.20444	3.76892	3.76892	Major	Major	4.38121	4.34023	2.853	5.24332	3.43488	4.15612	4.53732	3.26098	3.45531	4.38121	4.34023	2.853	5.24332	3.43488	4.15612	4.53732	3.26098	3.45531	-0.43552	3.96249	-0.902409	0.392139	0.605584	-6.30135	NonSig	NonSwitched	Single-promoter
438	ENSG00000081177	EXD2	chr14	69191511	+	FALSE	1	KC-PB.1451.1	1.51215	1.51215	2.82339	2.82339	Major	Major	0	0	3.85674	2.19185	3.02462	3.11259	3.14445	2.14878	2.68648	0	0	3.85674	2.19185	3.02462	3.11259	3.14445	2.14878	2.68648	1.31124	2.24061	1.67324	0.131251	0.323576	-5.40014	NonSig	NonSwitched	Single-promoter
439	ENSG00000081277	PKP1	chr1	201283386	+	FALSE	1	KC-PB.402.1,KC-PB.402.2,KC-PB.402.3	11.4464	11.4464	11.3134	11.3134	Major	Major	11.5343	11.5126	10.8336	11.9051	11.4308	11.2722	11.3971	11.0976	11.3693	11.5343	11.5126	10.8336	11.9051	11.4308	11.2722	11.3971	11.0976	11.3693	-0.133022	11.3725	-0.630197	0.545431	0.731424	-6.51592	NonSig	NonSwitched	Single-promoter
440	ENSG00000081665	ZNF506	chr19	19821778	-	FALSE	1	KC-PB.2236.1	4.41263	4.41263	3.95604	3.95604	Major	Major	3.03811	4.82593	4.37244	5.41405	4.16608	4.4866	2.63885	4.37494	4.11372	3.03811	4.82593	4.37244	5.41405	4.16608	4.4866	2.63885	4.37494	4.11372	-0.456595	4.15897	-0.83985	0.424396	0.632181	-6.35644	NonSig	NonSwitched	Single-promoter
441	ENSG00000081760	AACS	chr12	125065432	+	FALSE	1	KC-PB.1225.1	6.7154	6.7154	6.15345	6.15345	Major	Major	7.20052	6.06336	6.47878	7.11892	5.79247	6.12607	6.5814	6.04998	6.21733	7.20052	6.06336	6.47878	7.11892	5.79247	6.12607	6.5814	6.04998	6.21733	-0.561946	6.4032	-2.07176	0.0705898	0.228055	-4.82452	NonSig	NonSwitched	Single-promoter
442	ENSG00000082153	BZW1	chr2	200811561	+	FALSE	1	KC-PB.2594.1	2.60784	6.17687	2.85043	8.37022	Minor	Minor	3.76816	0	4.13751	2.52571	2.85709	3.88449	2.63885	2.40413	2.46759	5.25541	5.10616	7.88705	6.45887	8.76124	9.52707	7.87144	7.96992	7.72141	0.242583	2.74261	0.300206	0.771362	0.888517	-6.68056	NonSig	NonSwitched	Multi-promoter
443	ENSG00000082153	BZW1	chr2	200811912	+	FALSE	2	KC-PB.2594.2,KC-PB.2594.4,KC-PB.2594.3	3.56903	6.17687	5.51979	8.37022	Major	Major	1.48725	5.10616	3.74954	3.93316	5.90415	5.64258	5.2326	5.56579	5.25382	5.25541	5.10616	7.88705	6.45887	8.76124	9.52707	7.87144	7.96992	7.72141	1.95076	4.65278	3.1017	0.0138912	0.0889789	-3.22185	NonSig	NonSwitched	Multi-promoter
444	ENSG00000082213	C5orf22	chr5	31532287	+	FALSE	1	KC-PB.3448.1,KC-PB.3448.2,KC-PB.3448.3,KC-PB.3448.4	4.17673	4.17673	4.31473	4.31473	Major	Major	2.68046	5.06307	4.13751	4.82587	4.42767	4.87296	4.22076	3.79489	4.25737	2.68046	5.06307	4.13751	4.82587	4.42767	4.87296	4.22076	3.79489	4.25737	0.137999	4.2534	0.289634	0.779162	0.893393	-6.68397	NonSig	NonSwitched	Single-promoter
445	ENSG00000082258	CCNT2	chr2	134918825	+	FALSE	1	KC-PB.2502.1,KC-PB.2502.2	4.52877	4.52877	3.98988	3.98988	Major	Major	4.61153	4.71896	4.2983	4.4863	3.54925	3.88449	3.51811	4.43344	4.56413	4.61153	4.71896	4.2983	4.4863	3.54925	3.88449	3.51811	4.43344	4.56413	-0.538888	4.22939	-2.11111	0.0663357	0.219575	-4.76532	NonSig	NonSwitched	Single-promoter
446	ENSG00000082438	COBLL1	chr2	164841245	-	FALSE	1	KC-PB.2532.1	4.9663	4.9663	4.84295	4.84295	Major	Major	5.40876	4.87658	4.04986	5.53002	4.96972	4.15612	5.10142	4.99598	4.9915	5.40876	4.87658	4.04986	5.53002	4.96972	4.15612	5.10142	4.99598	4.9915	-0.123356	4.89777	-0.365051	0.724152	0.861278	-6.65706	NonSig	NonSwitched	Single-promoter
447	ENSG00000082497	SERTAD4	chr1	210232603	+	FALSE	1	KC-PB.431.1,KC-PB.431.2,KC-PB.431.3	2.85414	2.85414	3.7162	3.7162	Major	Major	3.32448	2.82388	4.13751	1.13069	3.75393	3.95734	3.88013	3.79489	3.19474	3.32448	2.82388	4.13751	1.13069	3.75393	3.95734	3.88013	3.79489	3.19474	0.862064	3.33306	1.60353	0.145919	0.342631	-5.49511	NonSig	NonSwitched	Single-promoter
448	ENSG00000082516	GEMIN5	chr5	154938210	-	FALSE	1	KC-PB.3645.1,KC-PB.3645.2,KC-PB.3645.3	5.14599	5.14599	4.85642	4.85642	Major	Major	4.9846	5.66273	5.05149	4.88515	4.69944	5.08288	4.76244	4.78752	4.9498	4.9846	5.66273	5.05149	4.88515	4.69944	5.08288	4.76244	4.78752	4.9498	-0.289575	4.98512	-1.57813	0.151627	0.35139	-5.52921	NonSig	NonSwitched	Single-promoter
449	ENSG00000082641	NFE2L1	chr17	48048333	+	FALSE	1	KC-PB.1981.1,KC-PB.1981.2,KC-PB.1981.3,KC-PB.1981.4	6.18408	11.1031	6.0159	10.6864	Major	Major	6.19262	6.5109	6.20213	5.83069	5.94651	6.02801	5.85445	6.0869	6.16363	10.9068	11.0529	11.2078	11.2447	10.3131	10.3029	9.97036	11.572	11.2734	-0.168186	6.09065	-1.08435	0.308539	0.532454	-6.12333	NonSig	NonSwitched	Multi-promoter
450	ENSG00000082641	NFE2L1	chr17	48048781	+	FALSE	2	KC-PB.1981.5	4.91897	11.1031	4.67046	10.6864	Minor	Minor	4.71422	4.54199	5.00563	5.41405	4.36658	4.27489	4.11591	5.48512	5.10981	10.9068	11.0529	11.2078	11.2447	10.3131	10.3029	9.97036	11.572	11.2734	-0.24851	4.78091	-0.755653	0.470645	0.672214	-6.42526	NonSig	NonSwitched	Multi-promoter
451	ENSG00000082701	GSK3B	chr3	120094447	-	FALSE	1	KC-PB.3077.1,KC-PB.3077.2,KC-PB.3077.3	7.36651	7.36651	7.32636	7.32636	Major	Major	7.2181	7.60412	7.32891	7.3149	7.40623	7.15495	7.16463	7.41067	7.49533	7.2181	7.60412	7.32891	7.3149	7.40623	7.15495	7.16463	7.41067	7.49533	-0.0401442	7.34421	-0.298109	0.772907	0.889794	-6.68125	NonSig	NonSwitched	Single-promoter
452	ENSG00000082898	XPO1	chr2	61538335	-	FALSE	1	KC-PB.2407.3,KC-PB.2407.4,KC-PB.2407.5	9.10642	9.10642	8.82924	8.82924	Major	Major	9.44162	9.28836	9.20277	8.49294	8.59075	9.06113	9.14212	8.69947	8.65271	9.44162	9.28836	9.20277	8.49294	8.59075	9.06113	9.14212	8.69947	8.65271	-0.277185	8.95243	-1.22872	0.252696	0.47495	-5.96486	NonSig	NonSwitched	Single-promoter
453	ENSG00000082996	RNF13	chr3	149812726	+	FALSE	1	KC-PB.3141.1,KC-PB.3141.2	5.11168	5.11168	4.51669	4.51669	Major	Major	4.61153	5.18865	4.9093	5.73726	4.42767	4.4866	4.36501	4.91617	4.38799	4.61153	5.18865	4.9093	5.73726	4.42767	4.4866	4.36501	4.91617	4.38799	-0.594996	4.78113	-2.49759	0.0359227	0.154047	-4.17045	NonSig	NonSwitched	Single-promoter
454	ENSG00000083099	LYRM2	chr6	89638748	-	FALSE	1	KC-PB.3795.1	4.12448	4.12448	4.8083	4.8083	Major	Major	3.56331	3.47695	5.22159	4.23608	4.59679	5.34967	3.88013	5.14345	5.07144	3.56331	3.47695	5.22159	4.23608	4.59679	5.34967	3.88013	5.14345	5.07144	0.683814	4.50438	1.57695	0.151897	0.351577	-5.53079	NonSig	NonSwitched	Single-promoter
455	ENSG00000083123	BCKDHB	chr6	80106671	+	FALSE	1	KC-PB.3782.1	3.94641	3.94641	3.55098	3.55098	Major	Major	3.32448	3.47695	4.22014	4.76405	4.01504	3.64086	3.51811	3.1256	3.45531	3.32448	3.47695	4.22014	4.76405	4.01504	3.64086	3.51811	3.1256	3.45531	-0.395423	3.72673	-1.2285	0.252772	0.47495	-5.96511	NonSig	NonSwitched	Single-promoter
456	ENSG00000083223	TUT7	chr9	86354452	-	FALSE	1	KC-PB.4360.1	4.47994	4.47994	4.40727	4.40727	Major	Major	4.81009	3.60263	4.51018	4.99687	4.30279	4.21673	4.22076	4.43344	4.86261	4.81009	3.60263	4.51018	4.99687	4.30279	4.21673	4.22076	4.43344	4.86261	-0.0726712	4.43957	-0.24796	0.810158	0.912268	-6.69623	NonSig	NonSwitched	Single-promoter
457	ENSG00000083307	GRHL2	chr8	101492439	+	FALSE	1	KC-PB.4245.1,KC-PB.4245.2	5.31855	5.31855	5.69944	5.69944	Major	Major	5.14026	5.44508	6.28124	4.40762	5.26577	5.66451	5.18155	6.04998	6.33537	5.14026	5.44508	6.28124	4.40762	5.26577	5.66451	5.18155	6.04998	6.33537	0.380888	5.53015	0.955782	0.366045	0.583538	-6.25181	NonSig	NonSwitched	Single-promoter
458	ENSG00000083312	TNPO1	chr5	72816661	+	FALSE	1	KC-PB.3508.1,KC-PB.3508.2	2.66427	6.8004	3.77305	8.52453	Minor	Minor	3.03811	3.47695	0	4.142	4.74815	3.80776	2.47892	3.96318	3.86726	7.28872	7.88762	4.85861	7.16665	9.75837	8.85771	6.48175	8.7507	8.77412	1.10879	3.28026	1.32895	0.219047	0.438697	-5.84686	NonSig	NonSwitched	Multi-promoter
459	ENSG00000083312	TNPO1	chr5	72848145	+	FALSE	2	KC-PB.3508.4	4.13613	6.8004	4.75148	8.52453	Major	Major	4.25061	4.41067	4.85861	3.02465	5.01022	5.04995	4.00283	4.78752	4.90687	7.28872	7.88762	4.85861	7.16665	9.75837	8.85771	6.48175	8.7507	8.77412	0.615345	4.47799	1.59977	0.146753	0.34436	-5.50019	NonSig	NonSwitched	Multi-promoter
460	ENSG00000083444	PLOD1	chr1	11934718	+	FALSE	1	KC-PB.31.1	4.90419	4.90419	5.05555	5.05555	Major	Major	5.58171	5.34071	5.29967	3.39467	4.88513	4.87296	4.61633	5.37002	5.53331	5.58171	5.34071	5.29967	3.39467	4.88513	4.87296	4.61633	5.37002	5.53331	0.151357	4.98828	0.333361	0.747083	0.874412	-6.6691	NonSig	NonSwitched	Single-promoter
461	ENSG00000083520	DIS3	chr13	72781931	-	FALSE	1	KC-PB.1302.1,KC-PB.1302.2,KC-PB.1302.3,KC-PB.1302.4	5.52525	5.52525	5.41955	5.41955	Major	Major	5.34617	5.94968	4.85861	5.94654	5.26577	4.8348	5.99413	5.21189	5.79114	5.34617	5.94968	4.85861	5.94654	5.26577	4.8348	5.99413	5.21189	5.79114	-0.105703	5.46653	-0.333136	0.747247	0.874412	-6.66919	NonSig	NonSwitched	Single-promoter
462	ENSG00000083720	OXCT1	chr5	41870425	-	FALSE	1	KC-PB.3469.1	6.41577	6.41577	6.05478	6.05478	Major	Major	6.26207	6.08506	6.57611	6.73982	5.88249	6.3724	6.28758	5.78382	5.94761	6.26207	6.08506	6.57611	6.73982	5.88249	6.3724	6.28758	5.78382	5.94761	-0.360984	6.21522	-1.87212	0.0965559	0.270494	-5.11898	NonSig	NonSwitched	Single-promoter
463	ENSG00000083799	CYLD	chr16	50742104	+	FALSE	1	KC-PB.1754.1	2.97742	2.97742	3.05966	3.05966	Major	Major	2.20385	3.01687	2.36458	4.3244	2.6675	3.80776	3.34335	2.14878	3.3309	2.20385	3.01687	2.36458	4.3244	2.6675	3.80776	3.34335	2.14878	3.3309	0.0822349	3.02311	0.164352	0.873365	0.947456	-6.71516	NonSig	NonSwitched	Single-promoter
464	ENSG00000083812	ZNF324	chr19	58467159	+	FALSE	1	KC-PB.2315.1	2.0436	2.0436	2.78799	2.78799	Major	Major	4.38121	1.00966	1.0268	1.75672	2.19183	3.34756	2.09346	2.97619	3.3309	4.38121	1.00966	1.0268	1.75672	2.19183	3.34756	2.09346	2.97619	3.3309	0.744391	2.45715	1.05195	0.322324	0.545754	-6.15688	NonSig	NonSwitched	Single-promoter
465	ENSG00000083857	FAT1	chr4	186726702	-	FALSE	1	KC-PB.3428.1,KC-PB.3428.2	4.17055	4.17055	4.05835	4.05835	Major	Major	4.9846	3.92487	3.95653	3.81619	4.79527	3.64086	4.27047	3.26098	4.32416	4.9846	3.92487	3.95653	3.81619	4.79527	3.64086	4.27047	3.26098	4.32416	-0.112202	4.10821	-0.304426	0.768257	0.886528	-6.67917	NonSig	NonSwitched	Single-promoter
466	ENSG00000084072	PPIE	chr1	39738877	+	FALSE	1	KC-PB.118.1	3.35298	3.35298	4.76187	4.76187	Major	Major	3.94751	4.82593	3.5078	1.13069	4.88513	4.4866	4.11591	5.21189	5.10981	3.94751	4.82593	3.5078	1.13069	4.88513	4.4866	4.11591	5.21189	5.10981	1.40888	4.1357	2.08435	0.0692004	0.226132	-4.80561	NonSig	NonSwitched	Single-promoter
467	ENSG00000084073	ZMPSTE24	chr1	40258235	+	FALSE	1	KC-PB.121.1	4.21972	4.21972	5.04321	5.04321	Major	Major	2.68046	4.1056	5.09593	4.99687	5.12533	4.87296	5.07369	5.03428	5.10981	2.68046	4.1056	5.09593	4.99687	5.12533	4.87296	5.07369	5.03428	5.10981	0.823499	4.67721	1.78409	0.110694	0.294769	-5.24515	NonSig	NonSwitched	Single-promoter
468	ENSG00000084090	STARD7	chr2	96208849	-	FALSE	1	KC-PB.2455.3,KC-PB.2455.1,KC-PB.2455.2,KC-PB.2455.4	6.60053	6.60053	6.61546	6.61546	Major	Major	6.29558	6.66293	6.91065	6.53298	6.59196	6.70413	6.91406	6.83718	6.02995	6.29558	6.66293	6.91065	6.53298	6.59196	6.70413	6.91406	6.83718	6.02995	0.0149266	6.60882	0.0699974	0.945844	0.988382	-6.72734	NonSig	NonSwitched	Single-promoter
469	ENSG00000084093	REST	chr4	56907892	+	FALSE	1	KC-PB.3287.1,KC-PB.3287.2	6.98865	8.41456	5.82329	6.94149	Major	Major	7.39856	7.18905	6.834	6.53298	5.4828	5.66451	6.55156	5.91279	5.5048	10.9619	8.19871	6.834	7.66367	7.36119	7.93494	6.55156	7.35495	5.5048	-1.16536	6.34123	-4.27699	0.00244829	0.0359655	-1.44776	DownReg	NonSwitched	Multi-promoter
470	ENSG00000084093	REST	chr4	56908951	+	FALSE	2	KC-PB.3287.3	1.42592	8.41456	1.1182	6.94149	Minor	Minor	3.56331	1.00966	0	1.13069	1.87839	2.27043	0	1.44216	0	10.9619	8.19871	6.834	7.66367	7.36119	7.93494	6.55156	7.35495	5.5048	-0.30772	1.25496	-0.390282	0.706101	0.850791	-6.64672	NonSig	NonSwitched	Multi-promoter
471	ENSG00000084112	SSH1	chr12	108857613	-	FALSE	1	KC-PB.1173.1	3.01737	3.01737	3.59511	3.59511	Major	Major	4.38121	2.60103	3.95653	1.13069	3.75393	3.45209	3.51811	4.37494	2.8765	4.38121	2.60103	3.95653	1.13069	3.75393	3.45209	3.51811	4.37494	2.8765	0.577749	3.33834	0.890467	0.398157	0.610634	-6.31212	NonSig	NonSwitched	Single-promoter
472	ENSG00000084234	APLP2	chr11	130069894	+	FALSE	1	KC-PB.952.4,KC-PB.952.2,KC-PB.952.1,KC-PB.952.3,KC-PB.952.5	7.47015	7.47015	7.65694	7.65694	Major	Major	7.90127	7.179	7.2025	7.59784	7.55739	7.88164	7.65093	7.51594	7.6788	7.90127	7.179	7.2025	7.59784	7.55739	7.88164	7.65093	7.51594	7.6788	0.186787	7.57392	1.04236	0.326498	0.548982	-6.16666	NonSig	NonSwitched	Single-promoter
473	ENSG00000084463	WBP11	chr12	14803477	-	FALSE	1	KC-PB.985.1,KC-PB.985.2	5.37751	5.37751	5.8027	5.8027	Major	Major	5.06452	5.37635	5.69593	5.37322	5.76905	5.47902	5.77058	6.06856	5.92627	5.06452	5.37635	5.69593	5.37322	5.76905	5.47902	5.77058	6.06856	5.92627	0.42519	5.61372	2.47257	0.0373795	0.157073	-4.20951	NonSig	NonSwitched	Single-promoter
474	ENSG00000084652	TXLNA	chr1	32179715	+	FALSE	1	KC-PB.98.1	3.66628	9.65592	4.07376	9.98222	Minor	Minor	4.107	3.18706	4.57441	2.79664	4.30279	4.43651	4.11591	3.1256	4.38799	10.878	8.5634	10.7142	8.46807	10.0239	10.6838	10.168	9.05881	9.97669	0.407485	3.89266	0.959549	0.364253	0.582178	-6.24822	NonSig	NonSwitched	Multi-promoter
475	ENSG00000084652	TXLNA	chr1	32180065	+	TRUE	2	KC-PB.98.3	5.98965	9.65592	5.90846	9.98222	NA	NA	6.77099	5.37635	6.13981	5.67143	5.72106	6.24724	6.05211	5.93321	5.58869	10.878	8.5634	10.7142	8.46807	10.0239	10.6838	10.168	9.05881	9.97669	-0.0811841	5.94454	-0.281732	0.785009	0.896627	-6.68643	NonSig	NonSwitched	Multi-promoter
476	ENSG00000084731	KIF3C	chr2	25982535	-	FALSE	1	KC-PB.2347.1	2.30061	2.30061	1.23443	1.23443	Major	Major	4.38121	0	2.62936	2.19185	0	2.97901	0.725559	0	2.46759	4.38121	0	2.62936	2.19185	0	2.97901	0.725559	0	2.46759	-1.06618	1.70829	-1.08926	0.30649	0.530463	-6.11818	NonSig	NonSwitched	Single-promoter
477	ENSG00000084733	RAB10	chr2	26034085	+	FALSE	1	KC-PB.2346.1,KC-PB.2346.2,KC-PB.2346.4,KC-PB.2346.3	8.01676	8.01676	7.93993	7.93993	Major	Major	7.99604	7.74027	7.86667	8.46407	7.64359	8.17683	7.95061	7.94082	7.98777	7.99604	7.74027	7.86667	8.46407	7.64359	8.17683	7.95061	7.94082	7.98777	-0.0768367	7.97408	-0.426478	0.680548	0.834901	-6.63072	NonSig	NonSwitched	Single-promoter
478	ENSG00000084774	CAD	chr2	27217388	+	FALSE	1	KC-PB.2350.1	6.42652	6.42652	5.43772	5.43772	Major	Major	6.39168	6.39407	6.60715	6.31318	5.5113	5.84813	5.62533	4.91617	5.28769	6.39168	6.39407	6.60715	6.31318	5.5113	5.84813	5.62533	4.91617	5.28769	-0.988795	5.87719	-5.06261	0.000855704	0.0189286	-0.366285	NonSig	NonSwitched	Single-promoter
479	ENSG00000085063	CD59	chr11	33736423	-	FALSE	1	KC-PB.771.1,KC-PB.771.2	6.16571	6.16571	6.52638	6.52638	Major	Major	6.19262	5.54241	7.09712	5.83069	7.17639	6.52399	6.12147	6.66477	6.14527	6.19262	5.54241	7.09712	5.83069	7.17639	6.52399	6.12147	6.66477	6.14527	0.360671	6.36608	1.02956	0.33213	0.551814	-6.17961	NonSig	NonSwitched	Single-promoter
480	ENSG00000085117	CD82	chr11	44565663	+	FALSE	1	KC-PB.792.2	6.33169	6.33169	6.54195	6.54195	Major	Major	6.48177	6.66293	6.44481	5.73726	6.85917	6.72515	6.12147	6.65251	6.35147	6.48177	6.66293	6.44481	5.73726	6.85917	6.72515	6.12147	6.65251	6.35147	0.21026	6.4485	0.899189	0.393756	0.6065	-6.30427	NonSig	NonSwitched	Single-promoter
481	ENSG00000085365	SCAMP1	chr5	78360533	+	FALSE	1	KC-PB.3526.1,KC-PB.3526.2,KC-PB.3526.3	5.80103	5.80103	6.1189	6.1189	Major	Major	6.26207	5.90158	5.75255	5.28793	5.86051	6.45019	5.93371	6.24224	6.10785	6.26207	5.90158	5.75255	5.28793	5.86051	6.45019	5.93371	6.24224	6.10785	0.317865	5.97763	1.4671	0.178993	0.386116	-5.6747	NonSig	NonSwitched	Single-promoter
482	ENSG00000085415	SEH1L	chr18	12948011	+	FALSE	1	KC-PB.2086.1,KC-PB.2086.2	6.08637	6.08637	6.21192	6.21192	Major	Major	5.87561	5.99624	5.83353	6.6401	6.2126	6.41182	6.28758	5.91279	6.23479	5.87561	5.99624	5.83353	6.6401	6.2126	6.41182	6.28758	5.91279	6.23479	0.125546	6.15612	0.639427	0.539696	0.727301	-6.50975	NonSig	NonSwitched	Single-promoter
483	ENSG00000085433	WDR47	chr1	109042102	-	FALSE	1	KC-PB.244.1	6.52486	6.52486	5.68522	5.68522	Major	Major	6.36035	6.49478	6.33785	6.90646	6.2126	5.76939	5.30593	5.21189	5.92627	6.36035	6.49478	6.33785	6.90646	6.2126	5.76939	5.30593	5.21189	5.92627	-0.839642	6.05839	-3.48599	0.00772065	0.0636819	-2.62533	NonSig	NonSwitched	Single-promoter
484	ENSG00000085449	WDFY1	chr2	223945359	-	FALSE	1	KC-PB.2632.1,KC-PB.2632.2,KC-PB.2632.3,KC-PB.2632.4	5.0657	5.0657	4.88489	4.88489	Major	Major	4.71422	4.26618	4.69489	6.58753	5.16174	4.27489	5.48502	4.59593	4.90687	4.71422	4.26618	4.69489	6.58753	5.16174	4.27489	5.48502	4.59593	4.90687	-0.180815	4.96525	-0.377041	0.71555	0.857359	-6.65223	NonSig	NonSwitched	Single-promoter
485	ENSG00000085491	SLC25A24	chr1	108200291	-	FALSE	1	KC-PB.238.1	4.6911	4.6911	4.38785	4.38785	Major	Major	4.89998	5.148	4.57441	4.142	4.54259	4.21673	4.57737	3.88148	4.72108	4.89998	5.148	4.57441	4.142	4.54259	4.21673	4.57737	3.88148	4.72108	-0.303248	4.52263	-1.20208	0.262327	0.483951	-5.99515	NonSig	NonSwitched	Single-promoter
486	ENSG00000085552	IGSF9	chr1	159945610	-	FALSE	1	KC-PB.333.1	4.60367	4.60367	3.58907	3.58907	Major	Major	4.38121	5.44508	3.95653	4.63185	3.31065	4.09286	4.27047	2.40413	3.86726	4.38121	5.44508	3.95653	4.63185	3.31065	4.09286	4.27047	2.40413	3.86726	-1.01459	4.04	-2.29958	0.0492039	0.18569	-4.47781	NonSig	NonSwitched	Single-promoter
487	ENSG00000085719	CPNE3	chr8	86514435	+	FALSE	1	KC-PB.4221.2,KC-PB.4221.1,KC-PB.4221.3,KC-PB.4221.4,KC-PB.4221.5,KC-PB.4221.6	6.86238	6.86238	6.64512	6.64512	Major	Major	6.92881	6.92599	6.80752	6.78721	6.5096	7.14719	6.89042	6.42635	6.25205	6.92881	6.92599	6.80752	6.78721	6.5096	7.14719	6.89042	6.42635	6.25205	-0.217264	6.74168	-1.11335	0.296596	0.520948	-6.09265	NonSig	NonSwitched	Single-promoter
488	ENSG00000085721	RRN3	chr16	15094272	-	FALSE	1	KC-PB.4485.1	0.670116	0.670116	1.96704	1.96704	Major	Major	2.68046	0	0	0	2.6675	2.66779	1.5659	1.44216	1.49184	2.68046	0	0	0	2.6675	2.66779	1.5659	1.44216	1.49184	1.29692	1.39063	2.08313	0.0693344	0.226132	-4.80745	NonSig	NonSwitched	Single-promoter
489	ENSG00000085733	CTTN	chr11	70398541	+	FALSE	1	KC-PB.857.1,KC-PB.857.2,KC-PB.857.3,KC-PB.857.4,KC-PB.857.5	6.38674	6.38674	6.66278	6.66278	Major	Major	6.69769	6.34095	5.75255	6.75579	6.64437	6.66116	6.51078	6.95169	6.54591	6.69769	6.34095	5.75255	6.75579	6.64437	6.66116	6.51078	6.95169	6.54591	0.276038	6.5401	1.24349	0.247482	0.469173	-5.94786	NonSig	NonSwitched	Single-promoter
490	ENSG00000085788	DDHD2	chr8	38231632	+	FALSE	1	KC-PB.4166.1,KC-PB.4166.2	4.71263	4.71263	4.10413	4.10413	Major	Major	3.56331	4.92551	5.26116	5.10055	4.59679	4.53501	3.88013	4.31397	3.19474	3.56331	4.92551	5.26116	5.10055	4.59679	4.53501	3.88013	4.31397	3.19474	-0.608507	4.37457	-1.43749	0.186994	0.398368	-5.71247	NonSig	NonSwitched	Single-promoter
491	ENSG00000085832	EPS15	chr1	51519256	-	FALSE	1	KC-PB.146.1	6.07375	6.07375	5.31292	5.31292	Major	Major	6.48177	5.87691	5.80704	6.12926	5.59357	5.70738	4.95712	5.39967	4.90687	6.48177	5.87691	5.80704	6.12926	5.59357	5.70738	4.95712	5.39967	4.90687	-0.760826	5.65107	-3.32855	0.00980096	0.0728921	-2.8683	NonSig	NonSwitched	Single-promoter
492	ENSG00000085872	CHERP	chr19	16542441	-	FALSE	1	KC-PB.2223.1	4.74016	4.74016	5.11093	5.11093	Major	Major	4.107	5.10616	5.26116	4.4863	5.08797	5.66451	4.27047	5.71474	4.81696	4.107	5.10616	5.26116	4.4863	5.08797	5.66451	4.27047	5.71474	4.81696	0.370773	4.94614	1.01164	0.340137	0.558775	-6.19753	NonSig	NonSwitched	Single-promoter
493	ENSG00000085978	ATG16L1	chr2	233251672	+	FALSE	1	KC-PB.2647.1,KC-PB.2647.2	4.51659	4.51659	4.5755	4.5755	Major	Major	5.28074	4.87658	4.22014	3.6889	4.54259	4.4866	5.37572	3.70276	4.76981	5.28074	4.87658	4.22014	3.6889	4.54259	4.4866	5.37572	3.70276	4.76981	0.0589046	4.54932	0.144277	0.888705	0.955062	-6.71857	NonSig	NonSwitched	Single-promoter
494	ENSG00000085982	USP40	chr2	233566787	-	FALSE	1	KC-PB.2649.1,KC-PB.2649.3	3.12146	3.12146	2.77415	2.77415	Major	Major	2.68046	2.01447	3.74954	4.04136	3.84631	1.7202	2.63885	2.62101	3.04437	2.68046	2.01447	3.74954	4.04136	3.84631	1.7202	2.63885	2.62101	3.04437	-0.34731	2.92851	-0.65642	0.529234	0.718925	-6.49818	NonSig	NonSwitched	Single-promoter
495	ENSG00000085999	RAD54L	chr1	46247759	+	FALSE	1	KC-PB.138.1	2.32716	2.32716	3.53126	3.53126	Major	Major	3.03811	2.33736	0	3.93316	3.54925	3.45209	4.00283	2.97619	3.67594	3.03811	2.33736	0	3.93316	3.54925	3.45209	4.00283	2.97619	3.67594	1.2041	2.9961	1.70825	0.124403	0.311886	-5.35168	NonSig	NonSwitched	Single-promoter
496	ENSG00000086062	B4GALT1	chr9	33167258	-	FALSE	1	KC-PB.4312.1,KC-PB.4312.2	5.65426	5.65426	6.12728	6.12728	Major	Major	5.8306	5.63358	6.0523	5.10055	6.40715	6.49981	5.90253	5.73814	6.08876	5.8306	5.63358	6.0523	5.10055	6.40715	6.49981	5.90253	5.73814	6.08876	0.473018	5.91705	1.96631	0.0833317	0.249154	-4.98136	NonSig	NonSwitched	Single-promoter
497	ENSG00000086102	NFX1	chr9	33290512	+	FALSE	1	KC-PB.4315.1,KC-PB.4315.2	4.63837	4.63837	4.28193	4.28193	Major	Major	4.61153	4.54199	4.63591	4.76405	4.74815	4.02669	4.16929	3.79489	4.67063	4.61153	4.54199	4.63591	4.76405	4.74815	4.02669	4.16929	3.79489	4.67063	-0.356439	4.44035	-1.65	0.135984	0.329945	-5.43203	NonSig	NonSwitched	Single-promoter
498	ENSG00000086200	IPO11	chr5	62412767	+	FALSE	1	KC-PB.3490.1	4.15439	4.15439	4.32873	4.32873	Major	Major	3.03811	4.54199	3.74954	5.28793	4.74815	4.8348	4.11591	4.37494	3.56983	3.03811	4.54199	3.74954	5.28793	4.74815	4.8348	4.11591	4.37494	3.56983	0.174333	4.25125	0.372754	0.718621	0.858205	-6.65398	NonSig	NonSwitched	Single-promoter
499	ENSG00000086232	EIF2AK1	chr7	6059180	-	FALSE	1	KC-PB.3903.1,KC-PB.3903.2,KC-PB.3903.3	6.98688	6.98688	6.4203	6.4203	Major	Major	7.0118	7.179	6.76687	6.98984	6.22985	6.79638	5.96423	6.27461	6.83642	7.0118	7.179	6.76687	6.98984	6.22985	6.79638	5.96423	6.27461	6.83642	-0.566578	6.67211	-2.6909	0.0264419	0.130628	-3.8674	NonSig	NonSwitched	Single-promoter
500	ENSG00000086300	SNX10	chr7	26291892	+	FALSE	1	KC-PB.3925.1,KC-PB.3925.2	0	0	1.13891	1.13891	Inactive	Major	0	0	0	0	0	0	1.5659	1.44216	2.68648	0	0	0	0	0	0	1.5659	1.44216	2.68648	1.13891	0.632727	2.10684	0.0667855	0.220476	-4.77177	NonSig	NonSwitched	Single-promoter
501	ENSG00000086475	SEPHS1	chr10	13348049	-	FALSE	1	KC-PB.516.1,KC-PB.516.2	0.759528	0.759528	2.45986	2.45986	Major	Major	3.03811	0	0	0	3.65521	1.7202	2.09346	2.62101	2.20943	3.03811	0	0	0	3.65521	1.7202	2.09346	2.62101	2.20943	1.70033	1.70416	2.40405	0.0416784	0.168947	-4.31617	NonSig	NonSwitched	Single-promoter
502	ENSG00000086598	TMED2	chr12	123584552	+	FALSE	1	KC-PB.1216.1	8.84747	8.84747	9.18872	9.18872	Major	Major	8.80825	8.87097	9.00138	8.7093	9.22589	9.19142	9.25599	9.05895	9.21133	8.80825	8.87097	9.00138	8.7093	9.22589	9.19142	9.25599	9.05895	9.21133	0.341242	9.03705	3.10286	0.0138664	0.0889789	-3.22004	NonSig	NonSwitched	Single-promoter
503	ENSG00000086712	TXLNG	chrX	16786466	+	FALSE	1	KC-PB.4556.2,KC-PB.4556.1	3.84185	3.84185	3.0371	3.0371	Major	Major	3.76816	4.41067	3.04658	4.142	3.17471	3.88449	2.7828	2.14878	3.19474	3.76816	4.41067	3.04658	4.142	3.17471	3.88449	2.7828	2.14878	3.19474	-0.804749	3.39477	-2.06257	0.0716205	0.230417	-4.83829	NonSig	NonSwitched	Single-promoter
504	ENSG00000086827	ZW10	chr11	113773692	-	FALSE	1	KC-PB.917.1	3.39033	3.39033	4.23688	4.23688	Major	Major	2.68046	4.01806	3.04658	3.81619	4.23606	4.53501	4.11591	4.1837	4.11372	2.68046	4.01806	3.04658	3.81619	4.23606	4.53501	4.11591	4.1837	4.11372	0.846552	3.86063	3.00166	0.0162283	0.0963133	-3.37873	NonSig	NonSwitched	Single-promoter
505	ENSG00000087053	MTMR2	chr11	95924118	-	FALSE	1	KC-PB.892.1,KC-PB.892.2,KC-PB.892.3,KC-PB.892.4,KC-PB.892.5	5.79528	5.79528	5.97145	5.97145	Major	Major	5.28074	5.80027	6.18166	5.91843	5.96723	6.06144	5.88668	5.89208	6.04983	5.28074	5.80027	6.18166	5.91843	5.96723	6.06144	5.88668	5.89208	6.04983	0.176175	5.89315	0.968921	0.359822	0.577793	-6.23926	NonSig	NonSwitched	Single-promoter
506	ENSG00000087087	SRRT	chr7	100875131	+	FALSE	1	KC-PB.4011.2,KC-PB.4011.3	6.48219	6.48219	6.15481	6.15481	Major	Major	6.79462	6.08506	6.26187	6.78721	5.96723	6.38566	6.35824	5.82811	6.23479	6.79462	6.08506	6.26187	6.78721	5.96723	6.38566	6.35824	5.82811	6.23479	-0.327384	6.30031	-1.58019	0.151156	0.350756	-5.52645	NonSig	NonSwitched	Single-promoter
507	ENSG00000087253	LPCAT2	chr16	55509072	+	FALSE	1	KC-PB.1761.1,KC-PB.1761.2	4.08035	4.08035	3.87941	3.87941	Major	Major	4.107	4.01806	3.04658	5.14973	4.09253	4.21673	3.51811	3.79489	3.77476	4.107	4.01806	3.04658	5.14973	4.09253	4.21673	3.51811	3.79489	3.77476	-0.20094	3.96871	-0.528517	0.610904	0.782838	-6.57839	NonSig	NonSwitched	Single-promoter
508	ENSG00000087263	OGFOD1	chr16	56451537	+	FALSE	1	KC-PB.1764.2,KC-PB.1764.1	4.63985	4.63985	5.5902	5.5902	Major	Major	5.68647	4.1056	4.44295	4.3244	5.29885	5.86716	5.66304	5.61717	5.5048	5.68647	4.1056	4.44295	4.3244	5.29885	5.86716	5.66304	5.61717	5.5048	0.950348	5.16783	3.00884	0.0160477	0.0954006	-3.36745	NonSig	NonSwitched	Single-promoter
509	ENSG00000087269	NOP14	chr4	2963376	-	FALSE	1	KC-PB.3237.2	4.47478	4.47478	5.14432	5.14432	Major	Major	3.32448	4.77344	4.75155	5.04964	5.61999	4.75531	5.37572	5.10797	4.86261	3.32448	4.77344	4.75155	5.04964	5.61999	4.75531	5.37572	5.10797	4.86261	0.669542	4.84675	1.82822	0.103379	0.280757	-5.18221	NonSig	NonSwitched	Single-promoter
510	ENSG00000087299	L2HGDH	chr14	50312232	-	FALSE	1	KC-PB.1398.1	3.02831	3.02831	2.59307	2.59307	Major	Major	3.32448	1.00966	2.62936	5.14973	3.17471	2.27043	3.03368	1.44216	3.04437	3.32448	1.00966	2.62936	5.14973	3.17471	2.27043	3.03368	1.44216	3.04437	-0.435236	2.78651	-0.561498	0.589214	0.763517	-6.55924	NonSig	NonSwitched	Single-promoter
511	ENSG00000087338	GMCL1	chr2	69829653	+	FALSE	1	KC-PB.2423.1,KC-PB.2423.2	2.3606	2.3606	2.27876	2.27876	Major	Major	3.03811	3.18706	3.21724	0	0.920075	2.02139	3.43338	2.80951	2.20943	3.03811	3.18706	3.21724	0	0.920075	2.02139	3.43338	2.80951	2.20943	-0.0818453	2.31513	-0.105621	0.918378	0.971173	-6.72389	NonSig	NonSwitched	Single-promoter
512	ENSG00000087365	SF3B2	chr11	66052367	+	FALSE	1	KC-PB.844.1,KC-PB.844.2	6.97255	6.97255	6.57125	6.57125	Major	Major	7.2181	7.31376	6.75306	6.60527	7.06544	6.89239	6.40349	6.1923	6.30262	7.2181	7.31376	6.75306	6.60527	7.06544	6.89239	6.40349	6.1923	6.30262	-0.401298	6.7496	-1.64238	0.137568	0.331788	-5.44243	NonSig	NonSwitched	Single-promoter
513	ENSG00000087448	KLHL42	chr12	27780179	+	FALSE	1	KC-PB.1002.1	4.7795	4.7795	4.80128	4.80128	Major	Major	4.71422	5.148	4.69489	4.56091	5.08797	4.27489	4.95712	4.6949	4.9915	4.71422	5.148	4.69489	4.56091	5.08797	4.27489	4.95712	4.6949	4.9915	0.0217742	4.7916	0.106024	0.918068	0.971173	-6.72384	NonSig	NonSwitched	Single-promoter
514	ENSG00000087460	GNAS	chr20	58889095	+	FALSE	1	KC-PB.2765.1	2.7863	11.9071	3.36504	12.8237	Minor	Minor	0	3.18706	3.63373	4.3244	2.85709	3.23485	3.51811	3.26098	3.95417	9.00339	12.2035	13.0109	13.4105	12.4872	12.7176	12.5954	12.7103	13.6083	0.578746	3.10782	0.724937	0.488315	0.684759	-6.4488	NonSig	NonSwitched	Multi-promoter
515	ENSG00000087460	GNAS	chr20	58891650	+	FALSE	2	KC-PB.2765.5,KC-PB.2765.6,KC-PB.2765.7,KC-PB.2765.10,KC-PB.2765.8,KC-PB.2765.9	9.12077	11.9071	9.4587	12.8237	Major	Major	9.00339	9.0164	9.37722	9.08607	9.63007	9.48271	9.07727	9.44929	9.65416	9.00339	12.2035	13.0109	13.4105	12.4872	12.7176	12.5954	12.7103	13.6083	0.337932	9.30851	2.14216	0.0631574	0.215362	-4.7184	NonSig	NonSwitched	Multi-promoter
516	ENSG00000087470	DNM1L	chr12	32679264	+	FALSE	1	KC-PB.1013.1,KC-PB.1013.2,KC-PB.1013.3,KC-PB.1013.4,KC-PB.1013.5	4.81506	4.81506	4.76213	4.76213	Major	Major	4.9846	4.41067	4.2983	5.56669	4.48627	4.7956	4.76244	4.6949	5.07144	4.9846	4.41067	4.2983	5.56669	4.48627	4.7956	4.76244	4.6949	5.07144	-0.0529328	4.78566	-0.195626	0.849582	0.932822	-6.70897	NonSig	NonSwitched	Single-promoter
517	ENSG00000087494	PTHLH	chr12	27969974	-	FALSE	1	KC-PB.1003.1	0	0	2.95295	2.95295	Inactive	Major	0	0	0	0	4.01504	3.11259	1.5659	3.38474	2.68648	0	0	0	0	4.01504	3.11259	1.5659	3.38474	2.68648	2.95295	1.64053	6.80624	0.000112355	0.00700742	1.70369	UpReg	Switched	Single-promoter
518	ENSG00000087502	ERGIC2	chr12	29381150	-	FALSE	1	KC-PB.1004.1	4.74563	4.74563	5.3716	5.3716	Major	Major	4.71422	3.33927	4.75155	6.17749	5.12533	5.52767	5.42044	5.30883	5.47571	4.71422	3.33927	4.75155	6.17749	5.12533	5.52767	5.42044	5.30883	5.47571	0.625963	5.09339	1.3019	0.227732	0.450422	-5.87931	NonSig	NonSwitched	Single-promoter
519	ENSG00000087510	TFAP2C	chr20	56629306	+	FALSE	1	KC-PB.2762.2,KC-PB.2762.1	7.615	7.615	7.34281	7.34281	Major	Major	7.72802	7.40285	7.64531	7.68382	7.24588	7.55186	7.33781	7.33597	7.24256	7.72802	7.40285	7.64531	7.68382	7.24588	7.55186	7.33781	7.33597	7.24256	-0.272184	7.46378	-2.20407	0.0572571	0.204782	-4.62427	NonSig	NonSwitched	Single-promoter
520	ENSG00000087995	METTL2A	chr17	62423886	+	FALSE	1	KC-PB.2017.1,KC-PB.2017.2	1.94339	1.94339	3.29865	3.29865	Major	Major	2.68046	1.59783	2.36458	1.13069	2.85709	3.95734	3.24733	2.97619	3.45531	2.68046	1.59783	2.36458	1.13069	2.85709	3.95734	3.24733	2.97619	3.45531	1.35526	2.69631	3.75436	0.00517841	0.0497548	-2.217	UpReg	NonSwitched	Single-promoter
521	ENSG00000088205	DDX18	chr2	117814664	+	FALSE	1	KC-PB.2488.1,KC-PB.2488.3	5.29935	5.29935	6.02303	6.02303	Major	Major	4.107	6.24782	5.51136	5.33121	6.66988	5.84813	6.18764	5.64219	5.76733	4.107	6.24782	5.51136	5.33121	6.66988	5.84813	6.18764	5.64219	5.76733	0.723684	5.7014	1.73951	0.118571	0.304977	-5.30802	NonSig	NonSwitched	Single-promoter
522	ENSG00000088280	ASAP3	chr1	23484213	-	FALSE	1	KC-PB.60.1	3.41077	3.41077	2.51944	2.51944	Major	Major	4.50096	2.82388	2.62936	3.6889	2.6675	2.27043	2.63885	3.1256	1.8948	4.50096	2.82388	2.62936	3.6889	2.6675	2.27043	2.63885	3.1256	1.8948	-0.891337	2.91559	-2.13489	0.0638874	0.215484	-4.7294	NonSig	NonSwitched	Single-promoter
523	ENSG00000088325	TPX2	chr20	31739269	+	FALSE	1	KC-PB.2707.1,KC-PB.2707.2,KC-PB.2707.3,KC-PB.2707.4,KC-PB.2707.5,KC-PB.2707.6,KC-PB.2707.7	3.42788	3.42788	5.09759	5.09759	Major	Major	4.38121	2.60103	3.5078	3.22149	4.48627	5.5514	4.72727	5.5394	5.18361	4.38121	2.60103	3.5078	3.22149	4.48627	5.5514	4.72727	5.5394	5.18361	1.66971	4.3555	4.36235	0.00217448	0.0337567	-1.32576	UpReg	NonSwitched	Single-promoter
524	ENSG00000088726	TMEM40	chr3	12759309	-	FALSE	1	KC-PB.2924.1,KC-PB.2924.3,KC-PB.2924.2,KC-PB.2924.4	6.14811	6.14811	5.54306	5.54306	Major	Major	7.18272	5.26668	5.66676	6.47627	5.72106	5.62032	4.86306	5.14345	6.36739	7.18272	5.26668	5.66676	6.47627	5.72106	5.62032	4.86306	5.14345	6.36739	-0.605055	5.81197	-1.35791	0.210063	0.427705	-5.81165	NonSig	NonSwitched	Single-promoter
525	ENSG00000088812	ATRN	chr20	3471022	+	FALSE	1	KC-PB.2675.1,KC-PB.2675.2	4.92354	4.92354	4.83979	4.83979	Major	Major	4.50096	5.10616	5.26116	4.82587	4.92804	5.2945	4.76244	4.95662	4.25737	4.50096	5.10616	5.26116	4.82587	4.92804	5.2945	4.76244	4.95662	4.25737	-0.0837438	4.87701	-0.349461	0.735398	0.868551	-6.66312	NonSig	NonSwitched	Single-promoter
526	ENSG00000088832	FKBP1A	chr20	1393088	-	FALSE	1	KC-PB.2668.1	7.40462	7.40462	7.41421	7.41421	Major	Major	7.14645	7.59659	7.52856	7.34688	7.81343	7.42916	7.23516	7.11251	7.48077	7.14645	7.59659	7.52856	7.34688	7.81343	7.42916	7.23516	7.11251	7.48077	0.00958739	7.40995	0.0549054	0.957506	0.994721	-6.72838	NonSig	NonSwitched	Single-promoter
527	ENSG00000088836	SLC4A11	chr20	3239215	-	FALSE	1	KC-PB.2681.1	0.252416	0.252416	0.362864	0.362864	Major	Major	0	1.00966	0	0	0.920075	0	0	0.894243	0	0	1.00966	0	0	0.920075	0	0	0.894243	0	0.110448	0.313776	0.344294	0.73914	0.869959	-6.66507	NonSig	NonSwitched	Single-promoter
528	ENSG00000088888	MAVS	chr20	3846844	+	FALSE	1	KC-PB.2678.2	4.76973	4.76973	3.5581	3.5581	Major	Major	4.61153	4.71896	4.75155	4.99687	2.85709	4.75531	3.14445	3.70276	3.3309	4.61153	4.71896	4.75155	4.99687	2.85709	4.75531	3.14445	3.70276	3.3309	-1.21163	4.0966	-3.3653	0.00926765	0.0705657	-2.81139	NonSig	NonSwitched	Single-promoter
529	ENSG00000088930	XRN2	chr20	21303331	+	FALSE	1	KC-PB.2699.1,KC-PB.2699.2	6.04332	6.04332	6.43634	6.43634	Major	Major	5.96163	5.74682	6.89816	5.56669	6.64437	6.31811	5.83806	6.61509	6.76609	5.96163	5.74682	6.89816	5.56669	6.64437	6.31811	5.83806	6.61509	6.76609	0.39302	6.26167	1.27416	0.23694	0.460977	-5.91213	NonSig	NonSwitched	Single-promoter
530	ENSG00000089009	RPL6	chr12	112409606	-	FALSE	1	KC-PB.2077.1	8.40705	8.40705	8.58581	8.58581	Major	Major	8.60942	8.64857	8.20775	8.16246	8.44324	8.5685	8.48841	8.80571	8.62317	8.60942	8.64857	8.20775	8.16246	8.44324	8.5685	8.48841	8.80571	8.62317	0.178757	8.50636	1.16737	0.275328	0.498873	-6.03393	NonSig	NonSwitched	Single-promoter
531	ENSG00000089048	ESF1	chr20	13784933	-	FALSE	1	KC-PB.2691.1,KC-PB.2691.2,KC-PB.2691.3,KC-PB.2691.4	2.20991	2.20991	3.8013	3.8013	Major	Major	0	4.66235	3.04658	1.13069	4.64903	3.88449	3.74602	4.04049	2.68648	0	4.66235	3.04658	1.13069	4.64903	3.88449	3.74602	4.04049	2.68648	1.59139	3.09402	1.77263	0.11267	0.297612	-5.26137	NonSig	NonSwitched	Single-promoter
532	ENSG00000089060	SLC8B1	chr12	113335109	-	FALSE	1	KC-PB.1190.1	0	0	0.539601	0.539601	Inactive	Major	0	0	0	0	1.87839	0.819616	0	0	0	0	0	0	0	1.87839	0.819616	0	0	0	0.539601	0.299778	1.36449	0.208069	0.424618	-5.80359	NonSig	NonSwitched	Single-promoter
533	ENSG00000089154	GCN1	chr12	120194718	-	FALSE	1	KC-PB.1199.1	3.01266	3.01266	3.211	3.211	Major	Major	3.94751	3.60263	3.36982	1.13069	3.43488	3.23485	3.43338	2.62101	3.3309	3.94751	3.60263	3.36982	1.13069	3.43488	3.23485	3.43338	2.62101	3.3309	0.19834	3.12285	0.363879	0.724995	0.861366	-6.65753	NonSig	NonSwitched	Single-promoter
534	ENSG00000089159	PXN	chr12	120222720	-	TRUE	2	KC-PB.1201.8	6.29566	11.3555	6.01817	10.7119	NA	NA	6.81787	5.99624	6.47878	5.88977	6.28041	5.86716	5.99413	6.15801	5.79114	11.3188	11.0593	11.7399	11.3038	11.8471	10.0839	10.5715	10.7018	10.3553	-0.277495	6.1415	-1.27387	0.237037	0.460977	-5.91247	NonSig	NonSwitched	Multi-promoter
535	ENSG00000089159	PXN	chr12	120265764	-	FALSE	1	KC-PB.1201.1,KC-PB.1201.2,KC-PB.1201.3,KC-PB.1201.4,KC-PB.1201.5,KC-PB.1201.9	5.05981	11.3555	4.69373	10.7119	Minor	Minor	4.50096	5.06307	5.26116	5.41405	5.56667	4.21673	4.57737	4.54377	4.56413	11.3188	11.0593	11.7399	11.3038	11.8471	10.0839	10.5715	10.7018	10.3553	-0.366078	4.85643	-1.21744	0.256737	0.478654	-5.97774	NonSig	NonSwitched	Multi-promoter
536	ENSG00000089220	PEBP1	chr12	118136104	+	FALSE	1	KC-PB.1196.1,KC-PB.1196.2	8.18374	8.18374	7.91709	7.91709	Major	Major	8.49868	7.92607	8.20268	8.10751	8.24537	7.87225	7.98452	7.70591	7.77744	8.49868	7.92607	8.20268	8.10751	8.24537	7.87225	7.98452	7.70591	7.77744	-0.266642	8.0356	-1.61373	0.143684	0.339169	-5.48135	NonSig	NonSwitched	Single-promoter
537	ENSG00000089234	BRAP	chr12	111685966	-	FALSE	1	KC-PB.1184.1,KC-PB.1184.2	3.27144	3.27144	4.22771	4.22771	Major	Major	2.68046	4.66235	3.21724	2.52571	3.93314	3.34756	4.76244	4.64626	4.44913	2.68046	4.66235	3.21724	2.52571	3.93314	3.34756	4.76244	4.64626	4.44913	0.956266	3.8027	1.96984	0.0828713	0.248404	-4.97615	NonSig	NonSwitched	Single-promoter
538	ENSG00000089280	FUS	chr16	31180140	+	FALSE	1	KC-PB.1741.1	6.11972	6.11972	7.27121	7.27121	Major	Major	4.9846	6.34095	6.69645	6.45687	7.60445	7.13938	7.31431	6.86932	7.4286	4.9846	6.34095	6.69645	6.45687	7.60445	7.13938	7.31431	6.86932	7.4286	1.1515	6.75944	3.30122	0.0102185	0.0742592	-2.9107	NonSig	NonSwitched	Single-promoter
539	ENSG00000089335	ZNF302	chr19	34677672	+	FALSE	1	KC-PB.2250.1	1.23058	1.23058	0.875081	0.875081	Major	Major	3.32448	1.59783	0	0	0	0	1.5659	2.80951	0	3.32448	1.59783	0	0	0	0	1.5659	2.80951	0	-0.355496	1.03308	-0.405979	0.694969	0.843175	-6.63995	NonSig	NonSwitched	Single-promoter
540	ENSG00000089597	GANAB	chr11	62646626	-	FALSE	1	KC-PB.825.2,KC-PB.825.1,KC-PB.825.5	5.90091	5.90091	6.01932	6.01932	Major	Major	6.19262	5.87691	6.16089	5.37322	6.2126	6.26169	5.77058	5.56579	6.28596	6.19262	5.87691	6.16089	5.37322	6.2126	6.26169	5.77058	5.56579	6.28596	0.118413	5.96669	0.504272	0.627112	0.795356	-6.59178	NonSig	NonSwitched	Single-promoter
541	ENSG00000089639	GMIP	chr19	19643650	-	FALSE	1	KC-PB.2234.1	2.22304	2.22304	2.31615	2.31615	Major	Major	2.68046	3.18706	0	3.02465	2.6675	2.97901	2.47892	0	3.45531	2.68046	3.18706	0	3.02465	2.6675	2.97901	2.47892	0	3.45531	0.0931049	2.27477	0.106664	0.917575	0.971173	-6.72377	NonSig	NonSwitched	Single-promoter
542	ENSG00000089682	RBM41	chrX	107118830	-	FALSE	1	KC-PB.4628.1,KC-PB.4628.2	3.40318	3.40318	2.63501	2.63501	Major	Major	4.107	3.33927	3.36982	2.79664	1.47738	1.7202	3.59815	2.80951	3.56983	4.107	3.33927	3.36982	2.79664	1.47738	1.7202	3.59815	2.80951	3.56983	-0.768172	2.97642	-1.47451	0.177039	0.383786	-5.66518	NonSig	NonSwitched	Single-promoter
543	ENSG00000089737	DDX24	chr14	94081198	-	FALSE	1	KC-PB.1496.1	0	0	0	0	Inactive	Inactive	0	0	0	0	0	0	0	0	0	0	0	0	0	0	0	0	0	0	0	0	0	1	1	-6.73005	NonSig	NonSwitched	Single-promoter
544	ENSG00000089818	NECAP1	chr12	8082275	+	FALSE	1	KC-PB.976.1	4.38908	4.38908	4.95457	4.95457	Major	Major	3.56331	4.82593	5.47817	3.6889	5.08797	5.2945	4.83029	4.99598	4.56413	3.56331	4.82593	5.47817	3.6889	5.08797	5.2945	4.83029	4.99598	4.56413	0.565497	4.70324	1.40411	0.196387	0.409235	-5.75449	NonSig	NonSwitched	Single-promoter
545	ENSG00000090020	SLC9A1	chr1	27155128	-	FALSE	1	KC-PB.75.2	7.08782	7.08782	6.15927	6.15927	Major	Major	7.36739	7.2383	7.21263	6.53298	5.94651	6.34551	6.1483	6.0869	6.2691	7.36739	7.2383	7.21263	6.53298	5.94651	6.34551	6.1483	6.0869	6.2691	-0.928557	6.57196	-4.85727	0.00111655	0.0230775	-0.639869	NonSig	NonSwitched	Single-promoter
546	ENSG00000090060	PAPOLA	chr14	96502384	+	FALSE	1	KC-PB.1500.2,KC-PB.1500.1,KC-PB.1500.3,KC-PB.1500.4,KC-PB.1500.5	6.69279	6.69279	6.33168	6.33168	Major	Major	7.12797	6.47847	6.20213	6.96258	6.55137	6.26169	6.09413	6.32183	6.42938	7.12797	6.47847	6.20213	6.96258	6.55137	6.26169	6.09413	6.32183	6.42938	-0.361108	6.49217	-1.71291	0.123518	0.310991	-5.3452	NonSig	NonSwitched	Single-promoter
547	ENSG00000090273	NUDC	chr1	26921747	+	FALSE	1	KC-PB.76.1	6.00718	6.00718	6.0786	6.0786	Major	Major	6.64666	5.10616	5.72452	6.55139	6.5096	6.20299	5.73561	5.64219	6.30262	6.64666	5.10616	5.72452	6.55139	6.5096	6.20299	5.73561	5.64219	6.30262	0.0714156	6.04686	0.202245	0.844568	0.930124	-6.70752	NonSig	NonSwitched	Single-promoter
548	ENSG00000090470	PDCD7	chr15	65133808	-	FALSE	1	KC-PB.1596.1	5.05973	5.05973	5.34708	5.34708	Major	Major	5.68647	4.77344	5.63699	4.142	5.36281	5.1774	5.32957	5.51251	5.35312	5.68647	4.77344	5.63699	4.142	5.36281	5.1774	5.32957	5.51251	5.35312	0.287356	5.21937	0.906619	0.390033	0.60496	-6.29753	NonSig	NonSwitched	Single-promoter
549	ENSG00000090520	DNAJB11	chr3	186570698	+	FALSE	1	KC-PB.3192.1	5.37816	5.37816	5.15493	5.15493	Major	Major	4.89998	5.94968	4.95827	5.70472	4.59679	5.42866	5.54683	5.33975	4.86261	4.89998	5.94968	4.95827	5.70472	4.59679	5.42866	5.54683	5.33975	4.86261	-0.223234	5.25414	-0.747501	0.475293	0.674518	-6.43159	NonSig	NonSwitched	Single-promoter
550	ENSG00000090530	P3H2	chr3	190120897	-	FALSE	1	KC-PB.3197.1,KC-PB.3197.2,KC-PB.3197.3	5.23849	5.23849	5.29242	5.29242	Major	Major	4.61153	5.51069	5.54381	5.28793	5.04962	5.04995	5.15533	5.76116	5.44603	4.61153	5.51069	5.54381	5.28793	5.04962	5.04995	5.15533	5.76116	5.44603	0.0539279	5.26845	0.221548	0.829991	0.922678	-6.70303	NonSig	NonSwitched	Single-promoter
551	ENSG00000090612	ZNF268	chr12	133181490	+	FALSE	1	KC-PB.1231.1	3.19331	3.19331	4.1997	4.1997	Major	Major	2.68046	3.60263	4.2983	2.19185	3.93314	3.80776	4.31851	4.37494	4.56413	2.68046	3.60263	4.2983	2.19185	3.93314	3.80776	4.31851	4.37494	4.56413	1.00639	3.75241	2.41792	0.0407702	0.166787	-4.29462	NonSig	NonSwitched	Single-promoter
552	ENSG00000090621	PABPC4	chr1	39576856	-	FALSE	1	KC-PB.122.1	6.78837	6.78837	7.1476	7.1476	Major	Major	6.62045	6.49478	7.34741	6.69082	7.42882	7.13153	7.11107	6.93154	7.13504	6.62045	6.49478	7.34741	6.69082	7.42882	7.13153	7.11107	6.93154	7.13504	0.359235	6.98794	1.82307	0.104209	0.282581	-5.1896	NonSig	NonSwitched	Single-promoter
553	ENSG00000090776	EFNB1	chrX	68828994	+	FALSE	1	KC-PB.4599.1,KC-PB.4599.2,KC-PB.4599.4,KC-PB.4599.3	6.8205	6.8205	6.63328	6.63328	Major	Major	6.88545	6.5109	6.52827	7.35738	6.75577	6.41182	6.41459	6.7478	6.83642	6.88545	6.5109	6.52827	7.35738	6.75577	6.41182	6.41459	6.7478	6.83642	-0.187222	6.71649	-0.903624	0.39153	0.605408	-6.30025	NonSig	NonSwitched	Single-promoter
554	ENSG00000090861	AARS1	chr16	70289531	-	FALSE	1	KC-PB.1800.2,KC-PB.1800.1,KC-PB.1800.3	2.66587	2.66587	2.83126	2.83126	Major	Major	2.68046	0	4.04986	3.93316	3.43488	3.45209	2.7828	1.44216	3.04437	2.68046	0	4.04986	3.93316	3.43488	3.45209	2.7828	1.44216	3.04437	0.165389	2.75775	0.193767	0.850992	0.932822	-6.70936	NonSig	NonSwitched	Single-promoter
555	ENSG00000090863	GLG1	chr16	74607113	-	FALSE	1	KC-PB.1810.1,KC-PB.1810.2	5.81952	5.81952	5.11726	5.11726	Major	Major	6.04281	6.01896	5.88509	5.33121	5.29885	5.14658	5.2819	4.78752	5.07144	6.04281	6.01896	5.88509	5.33121	5.29885	5.14658	5.2819	4.78752	5.07144	-0.70226	5.42937	-3.72174	0.0054332	0.0515068	-2.26619	NonSig	NonSwitched	Single-promoter
556	ENSG00000090889	KIF4A	chrX	70290068	+	FALSE	1	KC-PB.4600.1,KC-PB.4600.2	0.282673	0.282673	1.67764	1.67764	Major	Major	0	0	0	1.13069	0	2.83177	1.85366	3.70276	0	0	0	0	1.13069	0	2.83177	1.85366	3.70276	0	1.39497	1.05765	1.71937	0.1223	0.310112	-5.3362	NonSig	NonSwitched	Single-promoter
557	ENSG00000091009	RBM27	chr5	146203590	+	FALSE	1	KC-PB.3624.1	4.79497	4.79497	4.94605	4.94605	Major	Major	4.25061	5.47826	4.75155	4.69946	5.16174	4.94638	5.10142	5.0716	4.44913	4.25061	5.47826	4.75155	4.69946	5.16174	4.94638	5.10142	5.0716	4.44913	0.151083	4.87891	0.578778	0.578021	0.755187	-6.54877	NonSig	NonSwitched	Single-promoter
558	ENSG00000091039	OSBPL8	chr12	76559771	-	FALSE	1	KC-PB.1114.1	5.64499	5.64499	5.08286	5.08286	Major	Major	6.48177	5.71933	5.00563	5.37322	5.26577	4.4866	5.56686	4.74195	5.35312	6.48177	5.71933	5.00563	5.37322	5.26577	4.4866	5.56686	4.74195	5.35312	-0.562127	5.3327	-1.64829	0.136338	0.330164	-5.43437	NonSig	NonSwitched	Single-promoter
559	ENSG00000091127	PUS7	chr7	105522257	-	FALSE	1	KC-PB.4025.2,KC-PB.4025.1,KC-PB.4025.3,KC-PB.4025.4	3.62764	3.62764	4.41517	4.41517	Major	Major	3.03811	3.60263	3.63373	4.23608	4.16608	4.75531	5.01658	4.1837	3.95417	3.03811	3.60263	3.63373	4.23608	4.16608	4.75531	5.01658	4.1837	3.95417	0.787532	4.06515	2.61654	0.0297451	0.139504	-3.9842	NonSig	NonSwitched	Single-promoter
560	ENSG00000091136	LAMB1	chr7	108003156	-	FALSE	1	KC-PB.4032.1	3.90156	3.90156	4.05143	4.05143	Major	Major	3.56331	3.60263	4.2983	4.142	4.01504	3.95734	4.45374	3.79489	4.03615	3.56331	3.60263	4.2983	4.142	4.01504	3.95734	4.45374	3.79489	4.03615	0.149871	3.98482	0.715708	0.493707	0.687207	-6.4557	NonSig	NonSwitched	Single-promoter
561	ENSG00000091140	DLD	chr7	107891162	+	FALSE	1	KC-PB.4033.1	5.76247	5.76247	6.04036	6.04036	Major	Major	5.8306	5.66273	5.88509	5.67143	6.22985	5.88594	5.9182	6.15801	6.00981	5.8306	5.66273	5.88509	5.67143	6.22985	5.88594	5.9182	6.15801	6.00981	0.277899	5.91685	2.24753	0.0534431	0.196068	-4.55781	NonSig	NonSwitched	Single-promoter
562	ENSG00000091157	WDR7	chr18	56651363	+	FALSE	1	KC-PB.2140.1	4.50293	4.50293	3.27015	3.27015	Major	Major	4.9846	4.18812	3.5078	5.33121	3.54925	2.97901	3.24733	2.62101	3.95417	4.9846	4.18812	3.5078	5.33121	3.54925	2.97901	3.24733	2.62101	3.95417	-1.23278	3.81805	-2.96041	0.0173074	0.100693	-3.44351	NonSig	NonSwitched	Single-promoter
563	ENSG00000091317	CMTM6	chr3	32502821	-	FALSE	1	KC-PB.2950.1,KC-PB.2950.2	6.20047	6.20047	6.15206	6.15206	Major	Major	6.6724	5.60382	5.29967	7.22598	6.15957	6.17271	6.05211	5.99278	6.38314	6.6724	5.60382	5.29967	7.22598	6.15957	6.17271	6.05211	5.99278	6.38314	-0.0484069	6.17358	-0.12717	0.901817	0.96304	-6.72113	NonSig	NonSwitched	Single-promoter
564	ENSG00000091409	ITGA6	chr2	172427586	+	FALSE	1	KC-PB.2542.1,KC-PB.2542.2,KC-PB.2542.6,KC-PB.2542.5,KC-PB.2542.4,KC-PB.2542.3,KC-PB.2542.7,KC-PB.2542.8,KC-PB.2542.9	6.96993	28.573	6.71426	31.6241	Minor	Minor	6.72254	7.16887	6.82082	7.16749	6.97625	6.52399	7.13139	6.51028	6.42938	25.7225	30.2541	29.337	28.9784	31.8964	30.8887	32.1327	31.9617	31.2412	-0.255673	6.82789	-1.29778	0.229082	0.452436	-5.88422	NonSig	NonSwitched	Multi-promoter
565	ENSG00000091409	ITGA6	chr2	172484922	+	TRUE	2	KC-PB.2542.11	7.08784	28.573	8.0949	31.6241	NA	NA	6.64666	7.72653	6.93532	7.04287	7.97563	7.87225	8.20183	8.40643	8.01835	25.7225	30.2541	29.337	28.9784	31.8964	30.8887	32.1327	31.9617	31.2412	1.00705	7.64732	4.42136	0.00200456	0.0331452	-1.24203	UpReg	NonSwitched	Multi-promoter
566	ENSG00000091409	ITGA6	chr2	172487060	+	TRUE	3	KC-PB.2542.12	7.07023	28.573	8.15523	31.6241	NA	NA	5.96163	7.40285	7.64531	7.27112	8.25382	8.03256	8.10584	8.31603	8.06791	25.7225	30.2541	29.337	28.9784	31.8964	30.8887	32.1327	31.9617	31.2412	1.08501	7.67301	3.36556	0.00926401	0.0705657	-2.81099	NonSig	NonSwitched	Multi-promoter
567	ENSG00000091409	ITGA6	chr2	172487301	+	TRUE	4	KC-PB.2542.13	7.44499	28.573	8.65974	31.6241	NA	NA	6.39168	7.95582	7.93554	7.49694	8.69071	8.45987	8.69362	8.72896	8.72556	25.7225	30.2541	29.337	28.9784	31.8964	30.8887	32.1327	31.9617	31.2412	1.21475	8.11985	3.87656	0.00433126	0.0456518	-2.03388	UpReg	NonSwitched	Multi-promoter
568	ENSG00000091436	MAP3K20	chr2	173075849	+	FALSE	1	KC-PB.2545.1,KC-PB.2545.2	5.27822	5.27822	5.283	5.283	Major	Major	5.14026	5.26668	6.00647	4.69946	5.26577	5.08288	5.2819	5.39967	5.38476	5.14026	5.26668	6.00647	4.69946	5.26577	5.08288	5.2819	5.39967	5.38476	0.00477712	5.28087	0.0195713	0.984845	1	-6.72983	NonSig	NonSwitched	Single-promoter
569	ENSG00000091490	SEL1L3	chr4	25862819	-	FALSE	1	KC-PB.3255.1	1.35257	1.35257	2.09272	2.09272	Major	Major	0	1.59783	1.62059	2.19185	2.85709	0	2.29902	2.62101	2.68648	0	1.59783	1.62059	2.19185	2.85709	0	2.29902	2.62101	2.68648	0.740151	1.76376	1.09589	0.303742	0.527505	-6.1112	NonSig	NonSwitched	Single-promoter
570	ENSG00000091542	ALKBH5	chr17	18183479	+	FALSE	1	KC-PB.1905.1,KC-PB.1905.2,KC-PB.1905.3	6.60757	6.60757	6.6447	6.6447	Major	Major	6.62045	6.6915	6.30036	6.81796	6.76763	6.54778	6.60096	6.6024	6.70474	6.62045	6.6915	6.30036	6.81796	6.76763	6.54778	6.60096	6.6024	6.70474	0.0371342	6.6282	0.276778	0.788682	0.899276	-6.68795	NonSig	NonSwitched	Single-promoter
571	ENSG00000091592	NLRP1	chr17	5584526	-	FALSE	1	KC-PB.1873.1	5.63362	5.63362	4.82095	4.82095	Major	Major	5.96163	5.63358	5.13905	5.80021	5.08797	4.02669	5.35283	4.91617	4.72108	5.96163	5.63358	5.13905	5.80021	5.08797	4.02669	5.35283	4.91617	4.72108	-0.812671	5.18213	-2.82002	0.0215694	0.116495	-3.66431	NonSig	NonSwitched	Single-promoter
572	ENSG00000091986	CCDC80	chr3	112641300	-	FALSE	1	KC-PB.3067.4,KC-PB.3067.3,KC-PB.3067.2	2.89008	2.89008	2.97272	2.97272	Major	Major	3.32448	0	3.74954	4.4863	3.31065	3.64086	2.29902	1.83831	3.77476	3.32448	0	3.74954	4.4863	3.31065	3.64086	2.29902	1.83831	3.77476	0.0826424	2.93599	0.0921131	0.928781	0.979307	-6.72536	NonSig	NonSwitched	Single-promoter
573	ENSG00000092068	SLC7A8	chr14	23138097	-	TRUE	2	KC-PB.1360.2	6.80993	9.69608	6.07276	9.34469	NA	NA	6.95001	6.85198	6.68195	6.75579	6.52365	5.97636	6.05211	6.06856	5.74313	10.5133	6.85198	9.89919	11.5198	10.0729	8.64415	9.93225	9.86345	8.21071	-0.737169	6.40039	-4.40847	0.00204041	0.0331831	-1.26027	NonSig	NonSwitched	Multi-promoter
574	ENSG00000092068	SLC7A8	chr14	23183660	-	FALSE	1	KC-PB.1360.1,KC-PB.1360.3	2.88615	9.69608	3.27193	9.34469	Minor	Minor	3.56331	0	3.21724	4.76405	3.54925	2.66779	3.88013	3.79489	2.46759	10.5133	6.85198	9.89919	11.5198	10.0729	8.64415	9.93225	9.86345	8.21071	0.385779	3.10047	0.43914	0.671709	0.828852	-6.62481	NonSig	NonSwitched	Multi-promoter
575	ENSG00000092108	SCFD1	chr14	30622315	+	FALSE	1	KC-PB.1371.1	3.59595	3.59595	4.29775	4.29775	Major	Major	4.25061	2.60103	4.13751	3.39467	4.54259	4.15612	4.16929	4.43344	4.18733	4.25061	2.60103	4.13751	3.39467	4.54259	4.15612	4.16929	4.43344	4.18733	0.7018	3.98584	2.11837	0.0655788	0.218289	-4.75437	NonSig	NonSwitched	Single-promoter
576	ENSG00000092140	G2E3	chr14	30559158	+	FALSE	1	KC-PB.1369.1	4.07029	4.07029	4.18802	4.18802	Major	Major	3.76816	5.06307	3.63373	3.81619	3.84631	4.09286	4.31851	4.64626	4.03615	3.76816	5.06307	3.63373	3.81619	3.84631	4.09286	4.31851	4.64626	4.03615	0.117731	4.13569	0.371347	0.71963	0.858773	-6.65455	NonSig	NonSwitched	Single-promoter
577	ENSG00000092199	HNRNPC	chr14	21269427	-	FALSE	1	KC-PB.1353.1,KC-PB.1353.2,KC-PB.1353.3,KC-PB.1353.5,KC-PB.1353.6,KC-PB.1353.4	9.55344	9.55344	10.3488	10.3488	Major	Major	9.49308	9.64859	9.58832	9.48376	10.3254	10.386	10.3979	10.255	10.3797	9.49308	9.64859	9.58832	9.48376	10.3254	10.386	10.3979	10.255	10.3797	0.795365	9.99531	7.87798	3.84902e-05	0.0039095	2.7729	NonSig	NonSwitched	Single-promoter
578	ENSG00000092201	SUPT16H	chr14	21384019	-	FALSE	1	KC-PB.1356.1,KC-PB.1356.2,KC-PB.1356.3,KC-PB.1356.4	4.969	4.969	5.97272	5.97272	Major	Major	4.38121	5.10616	4.85861	5.53002	5.74525	6.41182	5.64431	5.99278	6.06943	4.38121	5.10616	4.85861	5.53002	5.74525	6.41182	5.64431	5.99278	6.06943	1.00372	5.52662	3.93028	0.00400678	0.043397	-1.95398	UpReg	NonSwitched	Single-promoter
579	ENSG00000092439	TRPM7	chr15	50686850	-	FALSE	1	KC-PB.1564.1	4.91229	4.91229	4.08619	4.08619	Major	Major	5.34617	5.2282	4.44295	4.63185	3.75393	4.02669	4.49613	4.04049	4.11372	5.34617	5.2282	4.44295	4.63185	3.75393	4.02669	4.49613	4.04049	4.11372	-0.8261	4.45335	-3.50886	0.00745959	0.0626923	-2.59023	NonSig	NonSwitched	Single-promoter
580	ENSG00000092470	WDR76	chr15	43826981	+	FALSE	1	KC-PB.1552.1	3.18342	3.18342	4.65107	4.65107	Major	Major	3.32448	3.60263	4.04986	1.75672	5.19726	4.8348	4.31851	4.1837	4.72108	3.32448	3.60263	4.04986	1.75672	5.19726	4.8348	4.31851	4.1837	4.72108	1.46765	3.99878	3.24064	0.011212	0.0774414	-3.0049	NonSig	NonSwitched	Single-promoter
581	ENSG00000092820	EZR	chr6	158819363	-	FALSE	1	KC-PB.3884.1,KC-PB.3884.2	5.84529	5.84529	5.92857	5.92857	Major	Major	6.08174	6.18892	5.54381	5.56669	6.69494	5.88594	5.42044	5.59171	6.04983	6.08174	6.18892	5.54381	5.56669	6.69494	5.88594	5.42044	5.59171	6.04983	0.0832802	5.89156	0.295387	0.774914	0.890375	-6.68213	NonSig	NonSwitched	Single-promoter
582	ENSG00000092964	DPYSL2	chr8	26577917	+	FALSE	1	KC-PB.4143.1	5.36339	5.36339	4.641	4.641	Major	Major	5.78414	4.41067	6.26187	4.99687	5.08797	4.71386	4.11591	5.51251	3.77476	5.78414	4.41067	6.26187	4.99687	5.08797	4.71386	4.11591	5.51251	3.77476	-0.722384	4.96206	-1.52287	0.164741	0.367872	-5.60236	NonSig	NonSwitched	Single-promoter
583	ENSG00000092969	TGFB2	chr1	218346092	+	FALSE	1	KC-PB.441.1	4.37723	4.37723	3.21133	3.21133	Major	Major	5.73613	4.34023	4.63591	2.79664	3.02462	4.09286	3.74602	2.14878	3.04437	5.73613	4.34023	4.63591	2.79664	3.02462	4.09286	3.74602	2.14878	3.04437	-1.1659	3.72951	-1.92206	0.0893136	0.258521	-5.04633	NonSig	NonSwitched	Single-promoter
584	ENSG00000093000	NUP50	chr22	45163985	+	FALSE	1	KC-PB.2898.3,KC-PB.2898.4,KC-PB.2898.5	5.64417	5.64417	5.66997	5.66997	Major	Major	5.46874	5.41112	5.80704	5.88977	5.64593	5.37649	6.12147	5.51251	5.69346	5.46874	5.41112	5.80704	5.88977	5.64593	5.37649	6.12147	5.51251	5.69346	0.0258013	5.6585	0.138459	0.893161	0.957535	-6.71947	NonSig	NonSwitched	Single-promoter
585	ENSG00000093183	SEC22C	chr3	42581992	-	FALSE	1	KC-PB.2965.1,KC-PB.2965.2,KC-PB.2965.4,KC-PB.2965.3	3.20259	3.20259	3.89302	3.89302	Major	Major	4.50096	4.18812	2.36458	1.75672	4.09253	3.95734	3.94279	4.59593	2.8765	4.50096	4.18812	2.36458	1.75672	4.09253	3.95734	3.94279	4.59593	2.8765	0.690424	3.58616	1.10965	0.298097	0.521779	-6.0966	NonSig	NonSwitched	Single-promoter
586	ENSG00000094631	HDAC6	chrX	48802211	+	FALSE	1	KC-PB.4587.1	0.70597	0.70597	1.26078	1.26078	Major	Major	0	2.82388	0	0	0	2.27043	1.5659	0	2.46759	0	2.82388	0	0	0	2.27043	1.5659	0	2.46759	0.554814	1.0142	0.693072	0.50709	0.699265	-6.47231	NonSig	NonSwitched	Single-promoter
587	ENSG00000094880	CDC23	chr5	138213383	-	FALSE	1	KC-PB.3598.1,KC-PB.3598.2	3.59333	3.59333	4.31364	4.31364	Major	Major	4.50096	2.60103	4.04986	3.22149	4.59679	3.95734	4.36501	4.6949	3.95417	4.50096	2.60103	4.04986	3.22149	4.59679	3.95734	4.36501	4.6949	3.95417	0.72031	3.99351	1.85527	0.0991231	0.273589	-5.14332	NonSig	NonSwitched	Single-promoter
588	ENSG00000095002	MSH2	chr2	47403148	+	FALSE	1	KC-PB.2389.1	4.57503	4.57503	4.04979	4.04979	Major	Major	4.50096	4.34023	4.69489	4.76405	3.84631	4.27489	4.16929	4.1837	3.77476	4.50096	4.34023	4.69489	4.76405	3.84631	4.27489	4.16929	4.1837	3.77476	-0.52524	4.28323	-3.31065	0.0100724	0.0737475	-2.89607	NonSig	NonSwitched	Single-promoter
589	ENSG00000095209	TMEM38B	chr9	105694544	+	FALSE	1	KC-PB.4390.1,KC-PB.4390.2	3.90218	3.90218	3.86617	3.86617	Major	Major	4.81009	4.26618	3.5078	3.02465	2.85709	3.80776	4.11591	4.59593	3.95417	4.81009	4.26618	3.5078	3.02465	2.85709	3.80776	4.11591	4.59593	3.95417	-0.0360069	3.88217	-0.0810219	0.937334	0.985282	-6.72642	NonSig	NonSwitched	Single-promoter
590	ENSG00000095261	PSMD5	chr9	120843373	-	FALSE	1	KC-PB.4414.1,KC-PB.4414.2,KC-PB.4414.3,KC-PB.4414.4	3.86667	3.86667	4.45813	4.45813	Major	Major	2.20385	5.01866	4.69489	3.54927	4.36658	4.38463	5.10142	4.11387	4.32416	2.20385	5.01866	4.69489	3.54927	4.36658	4.38463	5.10142	4.11387	4.32416	0.591465	4.19526	1.07647	0.311847	0.535775	-6.13155	NonSig	NonSwitched	Single-promoter
591	ENSG00000095383	TBC1D2	chr9	98255649	-	FALSE	1	KC-PB.4379.1,KC-PB.4379.3,KC-PB.4379.2	3.99011	3.99011	4.67169	4.67169	Major	Major	4.50096	4.18812	4.04986	3.22149	4.30279	4.91014	4.8951	4.43344	4.81696	4.50096	4.18812	4.04986	3.22149	4.30279	4.91014	4.8951	4.43344	4.81696	0.681581	4.36876	2.50646	0.0354205	0.15263	-4.1566	NonSig	NonSwitched	Single-promoter
592	ENSG00000095564	BTAF1	chr10	91923790	+	FALSE	1	KC-PB.630.1,KC-PB.630.2	5.00322	5.00322	4.26684	4.26684	Major	Major	5.58171	4.77344	4.95827	4.69946	3.31065	3.64086	4.61633	4.6949	5.07144	5.58171	4.77344	4.95827	4.69946	3.31065	3.64086	4.61633	4.6949	5.07144	-0.736386	4.59412	-1.86326	0.0978984	0.272179	-5.1318	NonSig	NonSwitched	Single-promoter
593	ENSG00000095574	IKZF5	chr10	123008795	-	FALSE	1	KC-PB.708.1	4.07138	4.07138	4.44185	4.44185	Major	Major	2.68046	5.34071	3.85674	4.40762	4.88513	4.38463	4.36501	4.2503	4.32416	2.68046	5.34071	3.85674	4.40762	4.88513	4.38463	4.36501	4.2503	4.32416	0.370462	4.2772	0.786254	0.453463	0.65863	-6.40097	NonSig	NonSwitched	Single-promoter
594	ENSG00000095787	WAC	chr10	28532779	+	FALSE	1	KC-PB.538.1,KC-PB.538.2	2.65772	2.65772	3.20519	3.20519	Major	Major	2.68046	2.82388	3.36982	1.75672	3.17471	3.45209	4.00283	1.44216	3.95417	2.68046	2.82388	3.36982	1.75672	3.17471	3.45209	4.00283	1.44216	3.95417	0.547474	2.96187	0.973087	0.357866	0.576184	-6.23525	NonSig	NonSwitched	Single-promoter
595	ENSG00000096060	FKBP5	chr6	35688915	-	FALSE	1	KC-PB.3721.1,KC-PB.3721.2,KC-PB.3721.3,KC-PB.3721.4	5.56782	5.56782	5.51204	5.51204	Major	Major	5.52633	5.63358	5.22159	5.88977	6.10451	5.64258	5.2819	5.17808	5.35312	5.52633	5.63358	5.22159	5.88977	6.10451	5.64258	5.2819	5.17808	5.35312	-0.0557813	5.53683	-0.247304	0.810649	0.912268	-6.69641	NonSig	NonSwitched	Single-promoter
596	ENSG00000096063	SRPK1	chr6	35872644	-	TRUE	2	KC-PB.3724.2	5.89345	10.564	6.22558	11.0719	NA	NA	6.00279	5.80027	5.9102	5.86053	6.40715	5.57474	6.16153	6.51028	6.47419	11.0673	10.5192	10.4846	10.1849	11.0039	10.1566	10.8528	11.6884	11.6578	0.33213	6.07797	1.61777	0.142807	0.338228	-5.47589	NonSig	NonSwitched	Multi-promoter
597	ENSG00000096063	SRPK1	chr6	35921095	-	FALSE	1	KC-PB.3724.1,KC-PB.3724.3	4.67057	10.564	4.84631	11.0719	Minor	Minor	5.06452	4.71896	4.57441	4.3244	4.59679	4.58184	4.69123	5.17808	5.18361	11.0673	10.5192	10.4846	10.1849	11.0039	10.1566	10.8528	11.6884	11.6578	0.175736	4.76821	0.834289	0.427351	0.634336	-6.36117	NonSig	NonSwitched	Multi-promoter
598	ENSG00000096093	EFHC1	chr6	52420302	+	FALSE	1	KC-PB.3755.1	3.55624	3.55624	3.53617	3.53617	Major	Major	3.76816	4.01806	3.21724	3.22149	3.02462	3.45209	3.51811	3.49871	4.18733	3.76816	4.01806	3.21724	3.22149	3.02462	3.45209	3.51811	3.49871	4.18733	-0.0200625	3.54509	-0.0747545	0.942171	0.986654	-6.72696	NonSig	NonSwitched	Single-promoter
599	ENSG00000096384	HSP90AB1	chr6	44247097	+	FALSE	1	KC-PB.3743.1	8.67098	8.67098	8.93493	8.93493	Major	Major	8.4173	8.82979	8.7112	8.72561	8.9443	9.13365	9.00387	8.72896	8.86387	8.4173	8.82979	8.7112	8.72561	8.9443	9.13365	9.00387	8.72896	8.86387	0.263958	8.81762	1.94334	0.0863874	0.254617	-5.01515	NonSig	NonSwitched	Single-promoter
600	ENSG00000096401	CDC5L	chr6	44387710	+	FALSE	1	KC-PB.3744.2,KC-PB.3744.1	3.06942	3.06942	4.23549	4.23549	Major	Major	0	4.18812	4.69489	3.39467	3.17471	4.4866	4.57737	4.48966	4.44913	0	4.18812	4.69489	3.39467	3.17471	4.4866	4.57737	4.48966	4.44913	1.16607	3.71724	1.29694	0.229357	0.452691	-5.88521	NonSig	NonSwitched	Single-promoter
601	ENSG00000096696	DSP	chr6	7541598	+	FALSE	1	KC-PB.3684.1,KC-PB.3684.3,KC-PB.3684.2,KC-PB.3684.4,KC-PB.3684.5,KC-PB.3684.8,KC-PB.3684.6,KC-PB.3684.7	12.4604	12.4604	12.1084	12.1084	Major	Major	12.5675	12.8881	12.0573	12.3286	12.0849	11.9213	12.4742	11.9299	12.1318	12.5675	12.8881	12.0573	12.3286	12.0849	11.9213	12.4742	11.9299	12.1318	-0.35195	12.2648	-1.77132	0.112898	0.297961	-5.26323	NonSig	NonSwitched	Single-promoter
602	ENSG00000096872	IFT74	chr9	26956419	+	FALSE	1	KC-PB.4306.1	2.20017	2.20017	4.41419	4.41419	Major	Major	0	2.60103	4.44295	1.75672	4.09253	4.71386	4.86306	4.83169	3.56983	0	2.60103	4.44295	1.75672	4.09253	4.71386	4.86306	4.83169	3.56983	2.21402	3.43019	2.79154	0.0225587	0.119875	-3.70913	NonSig	NonSwitched	Single-promoter
603	ENSG00000097033	SH3GLB1	chr1	86704618	+	FALSE	1	KC-PB.206.1,KC-PB.206.2	6.87476	6.87476	7.23586	7.23586	Major	Major	6.86327	7.45378	7.05271	6.12926	7.33627	7.39022	7.06252	7.17385	7.21642	6.86327	7.45378	7.05271	6.12926	7.33627	7.39022	7.06252	7.17385	7.21642	0.361099	7.07537	1.45191	0.18306	0.392508	-5.69414	NonSig	NonSwitched	Single-promoter
604	ENSG00000097046	CDC7	chr1	91500869	+	FALSE	1	KC-PB.215.1	1.62203	1.62203	1.84453	1.84453	Major	Major	0	1.59783	2.36458	2.52571	0.920075	2.27043	2.29902	1.83831	1.8948	0	1.59783	2.36458	2.52571	0.920075	2.27043	2.29902	1.83831	1.8948	0.222499	1.74564	0.41231	0.6905	0.84066	-6.63715	NonSig	NonSwitched	Single-promoter
605	ENSG00000099194	SCD	chr10	100347114	+	FALSE	1	KC-PB.658.2,KC-PB.658.3,KC-PB.658.4,KC-PB.658.5	6.71275	6.71275	6.2951	6.2951	Major	Major	7.0118	6.04133	6.99521	6.80266	6.45195	5.74901	6.23848	6.57667	6.45941	7.0118	6.04133	6.99521	6.80266	6.45195	5.74901	6.23848	6.57667	6.45941	-0.417648	6.48073	-1.63068	0.140036	0.334936	-5.45836	NonSig	NonSwitched	Single-promoter
606	ENSG00000099219	ERMP1	chr9	5833110	-	FALSE	1	KC-PB.4288.1	3.92448	3.92448	3.87505	3.87505	Major	Major	5.06452	4.01806	4.85861	1.75672	4.23606	3.80776	3.88013	3.88148	3.56983	5.06452	4.01806	4.85861	1.75672	4.23606	3.80776	3.88013	3.88148	3.56983	-0.0494252	3.89702	-0.0789722	0.938916	0.985794	-6.7266	NonSig	NonSwitched	Single-promoter
607	ENSG00000099246	RAB18	chr10	27504269	+	FALSE	1	KC-PB.534.1	6.58295	6.58295	6.44482	6.44482	Major	Major	6.86327	6.35887	6.16089	6.94875	6.46658	6.42472	6.23848	6.57667	6.51765	6.86327	6.35887	6.16089	6.94875	6.46658	6.42472	6.23848	6.57667	6.51765	-0.138129	6.50621	-0.730526	0.485069	0.68145	-6.44458	NonSig	NonSwitched	Single-promoter
608	ENSG00000099250	NRP1	chr10	33334666	-	FALSE	1	KC-PB.543.1	3.73199	3.73199	4.25829	4.25829	Major	Major	0	6.35887	4.63591	3.93316	3.65521	3.80776	5.46381	4.04049	4.32416	0	6.35887	4.63591	3.93316	3.65521	3.80776	5.46381	4.04049	4.32416	0.5263	4.02438	0.463488	0.654863	0.815711	-6.61297	NonSig	NonSwitched	Single-promoter
609	ENSG00000099284	MACROH2A2	chr10	70052849	+	FALSE	1	KC-PB.591.1	4.97322	4.97322	5.47825	5.47825	Major	Major	3.32448	5.10616	5.54381	5.91843	5.67141	5.20758	5.78774	5.33975	5.38476	3.32448	5.10616	5.54381	5.91843	5.67141	5.20758	5.78774	5.33975	5.38476	0.505028	5.25379	1.04334	0.326069	0.548666	-6.16567	NonSig	NonSwitched	Single-promoter
610	ENSG00000099290	WASHC2A	chr10	50067915	+	FALSE	1	KC-PB.567.1,KC-PB.567.2	3.79526	3.79526	4.69584	4.69584	Major	Major	4.71422	4.82593	4.51018	1.13069	4.8409	5.20758	4.31851	5.24494	3.86726	4.71422	4.82593	4.51018	1.13069	4.8409	5.20758	4.31851	5.24494	3.86726	0.900581	4.29558	1.16476	0.276326	0.500172	-6.03681	NonSig	NonSwitched	Single-promoter
611	ENSG00000099337	KCNK6	chr19	38319822	+	FALSE	1	KC-PB.2258.1,KC-PB.2258.2,KC-PB.2258.3,KC-PB.2258.5,KC-PB.2258.4	4.99902	4.99902	5.46146	5.46146	Major	Major	5.21221	4.47782	5.6066	4.69946	5.4828	5.23714	5.87065	5.21189	5.5048	5.21221	4.47782	5.6066	4.69946	5.4828	5.23714	5.87065	5.21189	5.5048	0.462433	5.25593	1.80706	0.106827	0.287053	-5.21247	NonSig	NonSwitched	Single-promoter
612	ENSG00000099812	MISP	chr19	751117	+	FALSE	1	KC-PB.2164.1	0	0	0.178849	0.178849	Inactive	Inactive	0	0	0	0	0	0	0	0.894243	0	0	0	0	0	0	0	0	0.894243	0	0.178849	0.0993604	0.863338	0.412074	0.621056	-6.33614	NonSig	NonSwitched	Single-promoter
613	ENSG00000099817	POLR2E	chr19	1095368	-	FALSE	1	KC-PB.2169.1	5.68059	5.68059	5.48341	5.48341	Major	Major	6.1566	5.54241	5.78005	5.24332	6.04727	5.6861	5.42044	4.78752	5.47571	6.1566	5.54241	5.78005	5.24332	6.04727	5.6861	5.42044	4.78752	5.47571	-0.197187	5.57105	-0.705153	0.499919	0.69192	-6.46351	NonSig	NonSwitched	Single-promoter
614	ENSG00000099821	POLRMT	chr19	633550	-	FALSE	1	KC-PB.2165.1	3.79882	3.79882	2.7393	2.7393	Major	Major	4.61153	3.01687	3.63373	3.93316	3.31065	2.48275	2.29902	2.14878	3.45531	4.61153	3.01687	3.63373	3.93316	3.31065	2.48275	2.29902	2.14878	3.45531	-1.05952	3.2102	-2.6698	0.0273394	0.133505	-3.90057	NonSig	NonSwitched	Single-promoter
615	ENSG00000099917	MED15	chr22	20507604	+	FALSE	1	KC-PB.2832.1,KC-PB.2832.2	5.95878	5.95878	5.57652	5.57652	Major	Major	5.46874	6.01896	5.9102	6.4372	5.5113	5.62032	5.42044	5.5394	5.79114	5.46874	6.01896	5.9102	6.4372	5.5113	5.62032	5.42044	5.5394	5.79114	-0.382256	5.74641	-1.95485	0.0848435	0.252433	-4.99824	NonSig	NonSwitched	Single-promoter
616	ENSG00000099942	CRKL	chr22	20917418	+	FALSE	1	KC-PB.2833.1,KC-PB.2833.2	6.84704	6.84704	6.52323	6.52323	Major	Major	6.95001	7.06351	6.6673	6.70734	6.4954	6.55953	6.33507	6.65251	6.57362	6.95001	7.06351	6.6673	6.70734	6.4954	6.55953	6.33507	6.65251	6.57362	-0.323813	6.66714	-2.45669	0.038334	0.16001	-4.23426	NonSig	NonSwitched	Single-promoter
617	ENSG00000099949	LZTR1	chr22	20982287	+	FALSE	1	KC-PB.2837.1	4.29727	4.29727	4.25983	4.25983	Major	Major	4.25061	4.47782	3.04658	5.41405	4.16608	4.21673	4.16929	4.48966	4.25737	4.25061	4.47782	3.04658	5.41405	4.16608	4.21673	4.16929	4.48966	4.25737	-0.0374411	4.27647	-0.0919652	0.928895	0.979307	-6.72538	NonSig	NonSwitched	Single-promoter
618	ENSG00000099968	BCL2L13	chr22	17638760	+	FALSE	1	KC-PB.2826.1	6.15195	6.15195	4.43931	4.43931	Major	Major	5.40876	6.12751	6.57611	6.49542	4.69944	4.21673	4.41005	4.91617	3.95417	5.40876	6.12751	6.57611	6.49542	4.69944	4.21673	4.41005	4.91617	3.95417	-1.71264	5.20049	-5.85321	0.000324613	0.0113723	0.627053	DownReg	NonSwitched	Single-promoter
619	ENSG00000099995	SF3A1	chr22	30356926	-	FALSE	1	KC-PB.2855.1,KC-PB.2855.2,KC-PB.2855.3	5.70599	5.70599	5.43536	5.43536	Major	Major	6.56657	6.01896	5.6066	4.63185	5.61999	5.76939	5.37572	4.99598	5.41572	6.56657	6.01896	5.6066	4.63185	5.61999	5.76939	5.37572	4.99598	5.41572	-0.270637	5.55564	-0.736977	0.481339	0.679031	-6.43967	NonSig	NonSwitched	Single-promoter
620	ENSG00000100014	SPECC1L	chr22	24270831	+	FALSE	1	KC-PB.2840.1	2.34488	2.34488	1.87769	1.87769	Major	Major	2.20385	2.01447	2.36458	2.79664	1.47738	2.48275	2.09346	2.40413	0.930726	2.20385	2.01447	2.36458	2.79664	1.47738	2.48275	2.09346	2.40413	0.930726	-0.467194	2.08533	-1.34537	0.213915	0.432575	-5.82696	NonSig	NonSwitched	Single-promoter
621	ENSG00000100030	MAPK1	chr22	21867648	-	FALSE	1	KC-PB.2835.1,KC-PB.2835.2	6.23787	6.23787	6.22957	6.22957	Major	Major	6.62045	5.77379	6.35624	6.20101	5.79247	6.11018	6.38104	6.29052	6.57362	6.62045	5.77379	6.35624	6.20101	5.79247	6.11018	6.38104	6.29052	6.57362	-0.00830626	6.23326	-0.0380538	0.970539	1	-6.72925	NonSig	NonSwitched	Single-promoter
622	ENSG00000100034	PPM1F	chr22	21952851	-	FALSE	1	KC-PB.2836.1,KC-PB.2836.2	2.07141	2.07141	0.97816	0.97816	Major	Major	3.76816	1.00966	3.5078	0	0	1.33906	0	2.62101	0.930726	3.76816	1.00966	3.5078	0	0	1.33906	0	2.62101	0.930726	-1.09325	1.46405	-1.20517	0.261196	0.483368	-5.99167	NonSig	NonSwitched	Single-promoter
623	ENSG00000100038	TOP3B	chr22	21982778	-	FALSE	1	KC-PB.2839.1	1.70036	1.70036	1.74801	1.74801	Major	Major	3.32448	3.47695	0	0	1.47738	2.48275	2.09346	0	2.68648	3.32448	3.47695	0	0	1.47738	2.48275	2.09346	0	2.68648	0.0476572	1.72683	0.0506778	0.960774	0.996712	-6.72863	NonSig	NonSwitched	Single-promoter
624	ENSG00000100065	CARD10	chr22	37519370	-	FALSE	1	KC-PB.2871.1	0.761646	0.761646	0	0	Major	Inactive	0	0	3.04658	0	0	0	0	0	0	0	0	3.04658	0	0	0	0	0	0	-0.761646	0.338509	-1.22948	0.252426	0.474801	-5.96399	NonSig	NonSwitched	Single-promoter
625	ENSG00000100099	HPS4	chr22	26483753	-	FALSE	1	KC-PB.2842.1	3.44971	3.44971	2.31333	2.31333	Major	Major	2.68046	3.33927	2.62936	5.14973	1.47738	2.48275	2.29902	2.62101	2.68648	2.68046	3.33927	2.62936	5.14973	1.47738	2.48275	2.29902	2.62101	2.68648	-1.13638	2.81839	-2.12882	0.0645046	0.216743	-4.73859	NonSig	NonSwitched	Single-promoter
626	ENSG00000100106	TRIOBP	chr22	37746307	+	FALSE	1	KC-PB.2869.1	4.63635	4.63635	3.80698	3.80698	Major	Major	5.46874	4.26618	4.57441	4.23608	3.65521	2.83177	4.41005	4.1837	3.95417	5.46874	4.26618	4.57441	4.23608	3.65521	2.83177	4.41005	4.1837	3.95417	-0.82937	4.17559	-2.19348	0.0582269	0.206997	-4.64043	NonSig	NonSwitched	Single-promoter
627	ENSG00000100109	TFIP11	chr22	26512472	-	FALSE	1	KC-PB.2843.1	3.63644	3.63644	4.56643	4.56643	Major	Major	3.94751	3.18706	3.36982	4.04136	4.74815	4.4866	4.76244	4.11387	4.72108	3.94751	3.18706	3.36982	4.04136	4.74815	4.4866	4.76244	4.11387	4.72108	0.929991	4.1531	4.01214	0.0035613	0.0416425	-1.83297	NonSig	NonSwitched	Single-promoter
628	ENSG00000100139	MICALL1	chr22	37906330	+	FALSE	1	KC-PB.2870.1	6.14245	6.14245	6.27715	6.27715	Major	Major	6.53886	6.04133	5.88509	6.10454	6.43717	6.27601	6.61064	6.0121	6.04983	6.53886	6.04133	5.88509	6.10454	6.43717	6.27601	6.61064	6.0121	6.04983	0.134694	6.21728	0.719504	0.491485	0.686562	-6.45287	NonSig	NonSwitched	Single-promoter
629	ENSG00000100201	DDX17	chr22	38506337	-	FALSE	1	KC-PB.2873.1,KC-PB.2873.2	8.72892	8.72892	8.01965	8.01965	Major	Major	8.95178	8.49494	8.64917	8.81978	7.62415	8.03677	8.18573	8.2846	7.96702	8.95178	8.49494	8.64917	8.81978	7.62415	8.03677	8.18573	8.2846	7.96702	-0.709263	8.33488	-4.18591	0.0027818	0.037762	-1.5791	NonSig	NonSwitched	Single-promoter
630	ENSG00000100207	TCF20	chr22	42210028	-	FALSE	1	KC-PB.4502.1	0	0	0	0	Inactive	Inactive	0	0	0	0	0	0	0	0	0	0	0	0	0	0	0	0	0	0	0	0	0	1	1	-6.73005	NonSig	NonSwitched	Single-promoter
631	ENSG00000100227	POLDIP3	chr22	42614886	-	FALSE	1	KC-PB.2891.1	5.04781	5.04781	5.05105	5.05105	Major	Major	5.40876	4.54199	4.9093	5.33121	5.53925	5.2945	4.95712	4.95662	4.50777	5.40876	4.54199	4.9093	5.33121	5.53925	5.2945	4.95712	4.95662	4.50777	0.0032401	5.04961	0.012469	0.990344	1	-6.72996	NonSig	NonSwitched	Single-promoter
632	ENSG00000100234	TIMP3	chr22	32801705	+	FALSE	1	KC-PB.2866.2,KC-PB.2866.1	5.37823	5.37823	4.22045	4.22045	Major	Major	5.68647	4.71896	5.9102	5.19728	4.54259	3.64086	4.69123	4.11387	4.11372	5.68647	4.71896	5.9102	5.19728	4.54259	3.64086	4.69123	4.11387	4.11372	-1.15778	4.73502	-3.84035	0.00456575	0.0466609	-2.08795	DownReg	NonSwitched	Single-promoter
633	ENSG00000100239	PPP6R2	chr22	50343330	+	FALSE	1	KC-PB.2906.1	3.10678	3.10678	3.77017	3.77017	Major	Major	5.28074	3.92487	0	3.22149	4.09253	3.45209	4.27047	3.26098	3.77476	5.28074	3.92487	0	3.22149	4.09253	3.45209	4.27047	3.26098	3.77476	0.663391	3.47533	0.715764	0.493674	0.687207	-6.45566	NonSig	NonSwitched	Single-promoter
634	ENSG00000100242	SUN2	chr22	38755998	-	FALSE	1	KC-PB.2874.1,KC-PB.2874.3	4.73911	4.73911	3.36195	3.36195	Major	Major	5.14026	4.01806	4.51018	5.28793	3.65521	2.02139	3.34335	4.11387	3.67594	5.14026	4.01806	4.51018	5.28793	3.65521	2.02139	3.34335	4.11387	3.67594	-1.37716	3.97402	-3.06754	0.0146473	0.0906382	-3.27538	NonSig	NonSwitched	Single-promoter
635	ENSG00000100243	CYB5R3	chr22	42649373	-	FALSE	1	KC-PB.2892.1	6.0286	6.0286	5.97714	5.97714	Major	Major	6.72254	5.30417	5.9102	6.17749	6.1231	6.38566	6.12147	5.66678	5.58869	6.72254	5.30417	5.9102	6.17749	6.1231	6.38566	6.12147	5.66678	5.58869	-0.0514601	6.00001	-0.172269	0.86733	0.9435	-6.71369	NonSig	NonSwitched	Single-promoter
636	ENSG00000100266	PACSIN2	chr22	43015149	-	FALSE	1	KC-PB.2894.1,KC-PB.2894.2	4.41783	4.41783	4.9462	4.9462	Major	Major	4.107	2.33736	5.33718	5.88977	4.92804	5.04995	5.2073	4.59593	4.9498	4.107	2.33736	5.33718	5.88977	4.92804	5.04995	5.2073	4.59593	4.9498	0.528375	4.71137	0.815013	0.437703	0.644356	-6.37738	NonSig	NonSwitched	Single-promoter
637	ENSG00000100280	AP1B1	chr22	29388552	-	FALSE	1	KC-PB.2849.1,KC-PB.2849.2	6.01669	6.01669	6.04416	6.04416	Major	Major	6.36035	5.80027	5.75255	6.15358	6.36092	6.30421	5.69978	5.45719	6.39872	6.36035	5.80027	5.75255	6.15358	6.36092	6.30421	5.69978	5.45719	6.39872	0.0274752	6.03195	0.109557	0.915349	0.970494	-6.72342	NonSig	NonSwitched	Single-promoter
638	ENSG00000100304	TTLL12	chr22	43187111	-	FALSE	1	KC-PB.2896.1,KC-PB.2896.2	4.0864	4.0864	4.4768	4.4768	Major	Major	5.28074	3.82525	4.44295	2.79664	4.59679	4.98174	4.53732	4.31397	3.95417	5.28074	3.82525	4.44295	2.79664	4.59679	4.98174	4.53732	4.31397	3.95417	0.390403	4.30329	0.839163	0.424761	0.632293	-6.35702	NonSig	NonSwitched	Single-promoter
639	ENSG00000100320	RBFOX2	chr22	35840428	-	FALSE	1	KC-PB.4500.1,KC-PB.2865.2	0	0	0	0	Inactive	Inactive	0	0	0	0	0	0	0	0	0	0	0	0	0	0	0	0	0	0	0	0	0	1	1	-6.73005	NonSig	NonSwitched	Single-promoter
640	ENSG00000100324	TAB1	chr22	39399782	+	FALSE	1	KC-PB.2877.1	1.56569	1.56569	1.30648	1.30648	Major	Major	0	2.01447	1.0268	3.22149	2.19183	1.7202	0.725559	0	1.8948	0	2.01447	1.0268	3.22149	2.19183	1.7202	0.725559	0	1.8948	-0.259212	1.42168	-0.368306	0.721812	0.859652	-6.65577	NonSig	NonSwitched	Single-promoter
641	ENSG00000100325	ASCC2	chr22	29838253	-	FALSE	1	KC-PB.2854.1,KC-PB.2854.3	3.58589	3.58589	4.52618	4.52618	Major	Major	3.56331	3.33927	3.5078	3.93316	4.42767	4.53501	4.53732	4.31397	4.81696	3.56331	3.33927	3.5078	3.93316	4.42767	4.53501	4.53732	4.31397	4.81696	0.940298	4.10827	5.82246	0.000336552	0.0114529	0.590172	NonSig	NonSwitched	Single-promoter
642	ENSG00000100335	MIEF1	chr22	39502360	+	FALSE	1	KC-PB.2878.1,KC-PB.2878.2,KC-PB.2878.3	3.33758	3.33758	3.70412	3.70412	Major	Major	3.76816	2.33736	4.22014	3.02465	4.30279	4.43651	4.11591	2.62101	3.04437	3.76816	2.33736	4.22014	3.02465	4.30279	4.43651	4.11591	2.62101	3.04437	0.366544	3.54121	0.71372	0.494873	0.688275	-6.45718	NonSig	NonSwitched	Single-promoter
643	ENSG00000100344	PNPLA3	chr22	43923762	+	FALSE	1	KC-PB.2897.1	2.53938	2.53938	0.748236	0.748236	Major	Major	3.32448	3.01687	0	3.81619	0	0	2.29902	1.44216	0	3.32448	3.01687	0	3.81619	0	0	2.29902	1.44216	0	-1.79115	1.5443	-2.08818	0.0687829	0.225449	-4.79985	NonSig	NonSwitched	Single-promoter
644	ENSG00000100345	MYH9	chr22	36387967	-	FALSE	1	KC-PB.2867.3,KC-PB.2867.4	7.64214	7.64214	7.8836	7.8836	Major	Major	7.89035	7.46209	7.82767	7.38844	7.94462	7.96791	8.0249	7.55599	7.9246	7.89035	7.46209	7.82767	7.38844	7.94462	7.96791	8.0249	7.55599	7.9246	0.241466	7.77629	1.48738	0.173688	0.379511	-5.64857	NonSig	NonSwitched	Single-promoter
645	ENSG00000100380	ST13	chr22	40856636	-	FALSE	1	KC-PB.2881.1,KC-PB.2881.2	9.01755	9.01755	8.47974	8.47974	Major	Major	8.95702	9.20162	9.19002	8.72155	8.34374	8.55095	8.54504	8.43176	8.52721	8.95702	9.20162	9.19002	8.72155	8.34374	8.55095	8.54504	8.43176	8.52721	-0.537815	8.71877	-3.95199	0.00388314	0.043043	-1.92181	NonSig	NonSwitched	Single-promoter
646	ENSG00000100401	RANGAP1	chr22	41286187	-	FALSE	1	KC-PB.2884.1,KC-PB.2884.2,KC-PB.2884.3	7.9654	7.9654	7.46655	7.46655	Major	Major	8.46226	7.58902	7.91708	7.89323	7.47296	7.43555	7.83149	7.15659	7.43617	8.46226	7.58902	7.91708	7.89323	7.47296	7.43555	7.83149	7.15659	7.43617	-0.498844	7.68826	-2.42712	0.0401781	0.165482	-4.2803	NonSig	NonSwitched	Single-promoter
647	ENSG00000100422	CERK	chr22	46738252	-	FALSE	1	KC-PB.2903.1	3.16701	3.16701	2.31217	2.31217	Major	Major	3.76816	2.33736	2.62936	3.93316	3.02462	1.33906	1.85366	2.14878	3.19474	3.76816	2.33736	2.62936	3.93316	3.02462	1.33906	1.85366	2.14878	3.19474	-0.854837	2.6921	-1.72542	0.121168	0.30863	-5.32775	NonSig	NonSwitched	Single-promoter
648	ENSG00000100426	ZBED4	chr22	49853862	+	FALSE	1	KC-PB.2905.1	1.66594	1.66594	3.28794	3.28794	Major	Major	3.32448	3.33927	0	0	2.85709	3.80776	3.34335	2.97619	3.45531	3.32448	3.33927	0	0	2.85709	3.80776	3.34335	2.97619	3.45531	1.622	2.56705	2.02988	0.075407	0.235046	-4.88713	NonSig	NonSwitched	Single-promoter
649	ENSG00000100439	ABHD4	chr14	22598300	+	FALSE	1	KC-PB.1355.1	4.34177	4.34177	4.97271	4.97271	Major	Major	4.61153	5.18865	3.63373	3.93316	5.23192	4.53501	4.61633	5.03428	5.44603	4.61153	5.18865	3.63373	3.93316	5.23192	4.53501	4.61633	5.03428	5.44603	0.630945	4.69229	1.82036	0.104647	0.283121	-5.19347	NonSig	NonSwitched	Single-promoter
650	ENSG00000100441	KHNYN	chr14	24429954	+	FALSE	1	KC-PB.1368.1	3.69062	3.69062	3.65375	3.65375	Major	Major	3.76816	3.82525	4.37244	2.79664	3.31065	3.72672	3.67398	3.88148	3.67594	3.76816	3.82525	4.37244	2.79664	3.31065	3.72672	3.67398	3.88148	3.67594	-0.0368665	3.67014	-0.124732	0.903688	0.964169	-6.72146	NonSig	NonSwitched	Single-promoter
651	ENSG00000100504	PYGL	chr14	50944763	-	FALSE	1	KC-PB.1402.2,KC-PB.1402.1	4.19703	4.19703	6.17772	6.17772	Major	Major	4.81009	4.18812	3.85674	3.93316	5.88249	6.11018	6.74856	6.15801	5.98937	4.81009	4.18812	3.85674	3.93316	5.88249	6.11018	6.74856	6.15801	5.98937	1.9807	5.29742	7.88272	3.83182e-05	0.0039095	2.77732	UpReg	NonSwitched	Single-promoter
652	ENSG00000100522	GNPNAT1	chr14	52791486	-	FALSE	1	KC-PB.1406.2	3.35568	3.35568	3.12829	3.12829	Major	Major	3.56331	3.47695	3.85674	2.52571	3.75393	2.66779	2.63885	3.1256	3.45531	3.56331	3.47695	3.85674	2.52571	3.75393	2.66779	2.63885	3.1256	3.45531	-0.227383	3.22935	-0.675112	0.517868	0.707813	-6.48514	NonSig	NonSwitched	Single-promoter
653	ENSG00000100523	DDHD1	chr14	53153316	-	FALSE	1	KC-PB.1407.1	4.00292	4.00292	2.90257	2.90257	Major	Major	3.32448	3.33927	4.2983	5.04964	2.44918	3.11259	3.67398	2.80951	2.46759	3.32448	3.33927	4.2983	5.04964	2.44918	3.11259	3.67398	2.80951	2.46759	-1.10035	3.39162	-2.61557	0.0297907	0.139534	-3.98572	NonSig	NonSwitched	Single-promoter
654	ENSG00000100528	CNIH1	chr14	54441386	-	FALSE	1	KC-PB.1409.1	9.32976	9.32976	8.76983	8.76983	Major	Major	9.7229	9.21152	9.30806	9.07657	8.61065	8.77406	9.19938	8.51199	8.75309	9.7229	9.21152	9.30806	9.07657	8.61065	8.77406	9.19938	8.51199	8.75309	-0.55993	9.01869	-2.95494	0.0174559	0.10074	-3.45211	NonSig	NonSwitched	Single-promoter
655	ENSG00000100558	PLEK2	chr14	67412145	-	FALSE	1	KC-PB.1441.1	3.17443	3.17443	3.28937	3.28937	Major	Major	3.03811	3.71823	3.74954	2.19185	3.54925	3.72672	3.24733	2.14878	3.77476	3.03811	3.71823	3.74954	2.19185	3.54925	3.72672	3.24733	2.14878	3.77476	0.114935	3.23829	0.262195	0.799527	0.905197	-6.69225	NonSig	NonSwitched	Single-promoter
656	ENSG00000100568	VTI1B	chr14	67674632	-	FALSE	1	KC-PB.1442.1	5.74732	5.74732	5.54066	5.54066	Major	Major	5.40876	5.80027	5.75255	6.0277	5.64593	5.88594	5.54683	4.95662	5.66798	5.40876	5.80027	5.75255	6.0277	5.64593	5.88594	5.54683	4.95662	5.66798	-0.206661	5.63251	-0.971124	0.358787	0.577114	-6.23714	NonSig	NonSwitched	Single-promoter
657	ENSG00000100580	TMED8	chr14	77377149	-	FALSE	1	KC-PB.1475.1	1.95639	1.95639	2.18887	2.18887	Major	Major	0	3.18706	3.5078	1.13069	2.6675	1.33906	2.63885	2.40413	1.8948	0	3.18706	3.5078	1.13069	2.6675	1.33906	2.63885	2.40413	1.8948	0.232481	2.08554	0.318628	0.757837	0.880528	-6.67434	NonSig	NonSwitched	Single-promoter
658	ENSG00000100592	DAAM1	chr14	59188669	+	FALSE	1	KC-PB.1424.1	6.54355	14.3792	6.42672	13.698	Minor	Minor	6.32833	6.82644	6.02957	6.98984	6.37649	6.48756	6.20052	6.5372	6.53185	14.2725	14.8456	13.3015	15.0974	13.4226	13.7614	13.5899	13.8578	13.8583	-0.116822	6.47864	-0.553381	0.594513	0.768932	-6.56405	NonSig	NonSwitched	Multi-promoter
659	ENSG00000100592	DAAM1	chr14	59363688	+	TRUE	2	KC-PB.1424.2,KC-PB.1424.3	7.8357	14.3792	7.27124	13.698	NA	NA	7.94416	8.01919	7.27194	8.10751	7.04609	7.27382	7.38933	7.32055	7.32641	14.2725	14.8456	13.3015	15.0974	13.4226	13.7614	13.5899	13.8578	13.8583	-0.564459	7.52211	-2.98442	0.0166705	0.0984443	-3.40579	NonSig	NonSwitched	Multi-promoter
660	ENSG00000100599	RIN3	chr14	92513781	+	FALSE	1	KC-PB.1494.1	1.31261	1.31261	1.44541	1.44541	Major	Major	2.20385	0	3.04658	0	0.920075	2.02139	1.20607	2.14878	0.930726	2.20385	0	3.04658	0	0.920075	2.02139	1.20607	2.14878	0.930726	0.1328	1.38639	0.192488	0.851962	0.932822	-6.70964	NonSig	NonSwitched	Single-promoter
661	ENSG00000100612	DHRS7	chr14	60165387	-	FALSE	1	KC-PB.1427.1	5.23534	5.23534	5.41744	5.41744	Major	Major	5.68647	5.74682	4.22014	5.28793	5.79247	5.32235	5.37572	5.21189	5.38476	5.68647	5.74682	4.22014	5.28793	5.79247	5.32235	5.37572	5.21189	5.38476	0.182096	5.33651	0.576645	0.579396	0.756706	-6.55008	NonSig	NonSwitched	Single-promoter
662	ENSG00000100614	PPM1A	chr14	60249221	+	FALSE	1	KC-PB.1428.1	5.92349	5.92349	5.07131	5.07131	Major	Major	5.73613	6.01896	5.88509	6.05377	4.88513	4.67118	5.54683	5.03428	5.21915	5.73613	6.01896	5.88509	6.05377	4.88513	4.67118	5.54683	5.03428	5.21915	-0.852176	5.45006	-4.50729	0.00178223	0.0309064	-1.12105	NonSig	NonSwitched	Single-promoter
663	ENSG00000100632	ERH	chr14	69398307	-	FALSE	1	KC-PB.1454.1	7.13856	7.13856	8.23296	8.23296	Major	Major	6.5106	7.01911	7.00689	8.01765	8.32379	8.40883	8.27366	8.12514	8.0334	6.5106	7.01911	7.00689	8.01765	8.32379	8.40883	8.27366	8.12514	8.0334	1.0944	7.74656	3.91777	0.00407997	0.0438196	-1.97256	UpReg	NonSwitched	Single-promoter
664	ENSG00000100644	HIF1A	chr14	61695505	+	FALSE	1	KC-PB.1433.1,KC-PB.1433.3,KC-PB.1433.2	5.74612	5.74612	6.53185	6.53185	Major	Major	6.08174	6.42843	5.37374	5.10055	6.4954	6.41182	6.45814	6.57667	6.71722	6.08174	6.42843	5.37374	5.10055	6.4954	6.41182	6.45814	6.57667	6.71722	0.785733	6.18263	2.91519	0.018576	0.105156	-3.51459	NonSig	NonSwitched	Single-promoter
665	ENSG00000100647	SUSD6	chr14	69611593	+	FALSE	1	KC-PB.1453.1,KC-PB.1453.2	5.81346	5.81346	5.33263	5.33263	Major	Major	5.63504	6.06336	5.63699	5.91843	5.08797	5.20758	5.54683	4.91617	5.90461	5.63504	6.06336	5.63699	5.91843	5.08797	5.20758	5.54683	4.91617	5.90461	-0.480827	5.54633	-2.16522	0.0608933	0.212231	-4.68343	NonSig	NonSwitched	Single-promoter
666	ENSG00000100650	SRSF5	chr14	69767142	+	FALSE	1	KC-PB.1456.1	8.01387	8.01387	8.27318	8.27318	Major	Major	7.62633	8.20902	8.24276	7.97736	8.47252	8.02411	8.00668	8.23612	8.62648	7.62633	8.20902	8.24276	7.97736	8.47252	8.02411	8.00668	8.23612	8.62648	0.259314	8.15793	1.33747	0.21637	0.436052	-5.83655	NonSig	NonSwitched	Single-promoter
667	ENSG00000100664	EIF5	chr14	103334237	+	FALSE	1	KC-PB.1511.2,KC-PB.1511.1	5.30375	5.30375	7.07065	7.07065	Major	Major	4.61153	5.77379	5.78005	5.04964	6.84804	6.97366	7.48717	6.75928	7.28509	4.61153	5.77379	5.78005	5.04964	6.84804	6.97366	7.48717	6.75928	7.28509	1.76689	6.28536	6.16556	0.000226471	0.00966575	0.993946	UpReg	NonSwitched	Single-promoter
668	ENSG00000100714	MTHFD1	chr14	64388351	+	FALSE	1	KC-PB.1435.1	4.32977	4.32977	5.8204	5.8204	Major	Major	5.21221	4.66235	4.04986	3.39467	6.00781	6.26169	5.35283	5.76116	5.71851	5.21221	4.66235	4.04986	3.39467	6.00781	6.26169	5.35283	5.76116	5.71851	1.49063	5.1579	4.09237	0.00317569	0.04061	-1.71523	UpReg	NonSwitched	Single-promoter
669	ENSG00000100722	ZC3H14	chr14	88563010	+	FALSE	1	KC-PB.1487.1,KC-PB.1487.2,KC-PB.1487.3,KC-PB.1487.4,KC-PB.1487.6	4.40967	4.40967	4.55788	4.55788	Major	Major	4.9846	4.71896	5.4094	2.52571	4.69944	4.27489	4.36501	4.83169	4.61836	4.9846	4.71896	5.4094	2.52571	4.69944	4.27489	4.36501	4.83169	4.61836	0.148213	4.49201	0.27603	0.789238	0.899276	-6.68817	NonSig	NonSwitched	Single-promoter
670	ENSG00000100726	TELO2	chr16	1493398	+	FALSE	1	KC-PB.1671.1,KC-PB.1671.2	2.62448	2.62448	1.74588	1.74588	Major	Major	4.38121	3.92487	0	2.19185	1.87839	1.33906	1.20607	1.83831	2.46759	4.38121	3.92487	0	2.19185	1.87839	1.33906	1.20607	1.83831	2.46759	-0.8786	2.13637	-1.04893	0.323636	0.546828	-6.15997	NonSig	NonSwitched	Single-promoter
671	ENSG00000100764	PSMC1	chr14	90256575	+	FALSE	1	KC-PB.3032.1	2.66641	2.66641	5.02675	5.02675	Major	Major	0	5.90158	0	4.76405	0	6.04482	6.16153	6.36755	6.55983	0	5.90158	0	4.76405	0	6.04482	6.16153	6.36755	6.55983	2.36034	3.97771	1.30167	0.227809	0.450422	-5.87959	NonSig	NonSwitched	Single-promoter
672	ENSG00000100784	RPS6KA5	chr14	91060683	-	FALSE	1	KC-PB.1493.1	4.54698	4.54698	3.70932	3.70932	Major	Major	4.25061	4.87658	4.57441	4.4863	2.85709	4.09286	3.03368	4.11387	4.44913	4.25061	4.87658	4.57441	4.4863	2.85709	4.09286	3.03368	4.11387	4.44913	-0.837652	4.08161	-2.32955	0.0469166	0.180749	-4.43158	NonSig	NonSwitched	Single-promoter
673	ENSG00000100811	YY1	chr14	100238927	+	FALSE	1	KC-PB.1502.1,KC-PB.1502.2	6.49574	6.49574	6.76774	6.76774	Major	Major	6.56657	7.25754	6.02957	6.12926	6.84804	6.61687	6.60096	6.82631	6.94652	6.56657	7.25754	6.02957	6.12926	6.84804	6.61687	6.60096	6.82631	6.94652	0.272004	6.64685	1.07582	0.312121	0.535775	-6.13223	NonSig	NonSwitched	Single-promoter
674	ENSG00000100813	ACIN1	chr14	23071581	-	FALSE	2	KC-PB.1358.3	1.73776	6.05473	1.9186	5.69876	Minor	Minor	0	1.00966	3.74954	2.19185	2.44918	1.7202	2.09346	1.83831	1.49184	4.38121	5.11526	7.96968	6.75276	6.1044	5.81305	5.97359	5.54106	5.06167	0.180833	1.83823	0.267121	0.795859	0.903185	-6.69082	NonSig	NonSwitched	Multi-promoter
675	ENSG00000100813	ACIN1	chr14	23095136	-	FALSE	1	KC-PB.1358.1,KC-PB.1358.2,KC-PB.1358.4	4.31696	6.05473	3.78016	5.69876	Major	Major	4.38121	4.1056	4.22014	4.56091	3.65521	4.09286	3.88013	3.70276	3.56983	4.38121	5.11526	7.96968	6.75276	6.1044	5.81305	5.97359	5.54106	5.06167	-0.536806	4.01874	-3.45589	0.00807912	0.0660259	-2.67161	NonSig	NonSwitched	Multi-promoter
676	ENSG00000100836	PABPN1	chr14	23321487	+	FALSE	1	KC-PB.1363.1	7.51893	7.51893	6.50167	6.50167	Major	Major	7.33552	7.47858	7.52856	7.73306	6.64437	6.7561	6.51078	6.1229	6.47419	7.33552	7.47858	7.52856	7.73306	6.64437	6.7561	6.51078	6.1229	6.47419	-1.01726	6.95379	-6.41206	0.000171939	0.00837317	1.27368	DownReg	NonSwitched	Single-promoter
677	ENSG00000100890	PRORP	chr14	35122552	+	FALSE	1	KC-PB.1386.1	3.62293	3.62293	4.84732	4.84732	Major	Major	1.48725	3.92487	4.13751	4.94209	4.8409	4.98174	4.65427	4.37494	5.38476	1.48725	3.92487	4.13751	4.94209	4.8409	4.98174	4.65427	4.37494	5.38476	1.22439	4.30315	1.94087	0.0867229	0.254617	-5.01878	NonSig	NonSwitched	Single-promoter
678	ENSG00000100897	DCAF11	chr14	24114795	+	FALSE	1	KC-PB.1366.1	5.1327	5.1327	3.91722	3.91722	Major	Major	5.34617	5.148	5.33718	4.69946	4.16608	3.64086	4.27047	4.31397	3.19474	5.34617	5.148	5.33718	4.69946	4.16608	3.64086	4.27047	4.31397	3.19474	-1.21548	4.45744	-4.46569	0.00188635	0.0317818	-1.17948	DownReg	NonSwitched	Single-promoter
679	ENSG00000100906	NFKBIA	chr14	35404749	-	FALSE	1	KC-PB.1384.1,KC-PB.1384.2	8.4701	8.4701	8.05299	8.05299	Major	Major	8.43244	8.17401	8.69323	8.58073	7.72494	7.84371	8.31865	8.08465	8.29302	8.43244	8.17401	8.69323	8.58073	7.72494	7.84371	8.31865	8.08465	8.29302	-0.417109	8.23838	-2.34275	0.0459425	0.178889	-4.41117	NonSig	NonSwitched	Single-promoter
680	ENSG00000100926	TM9SF1	chr14	24195677	-	FALSE	1	KC-PB.1370.2,KC-PB.1370.1,KC-PB.1370.3,KC-PB.1370.4	4.41844	4.41844	4.08606	4.08606	Major	Major	5.06452	4.26618	3.85674	4.4863	4.09253	4.15612	3.67398	4.2503	4.25737	5.06452	4.26618	3.85674	4.4863	4.09253	4.15612	3.67398	4.2503	4.25737	-0.332375	4.23378	-1.33595	0.216846	0.436269	-5.8384	NonSig	NonSwitched	Single-promoter
681	ENSG00000100934	SEC23A	chr14	39103230	-	FALSE	1	KC-PB.1385.1	4.71393	4.71393	4.3955	4.3955	Major	Major	4.81009	4.18812	4.22014	5.63736	3.93314	5.14658	4.22076	4.48966	4.18733	4.81009	4.18812	4.22014	5.63736	3.93314	5.14658	4.22076	4.48966	4.18733	-0.318431	4.53702	-0.885367	0.400748	0.612721	-6.31669	NonSig	NonSwitched	Single-promoter
682	ENSG00000100941	PNN	chr14	39175243	+	FALSE	1	KC-PB.1387.1,KC-PB.1387.2	6.73038	6.73038	6.81313	6.81313	Major	Major	6.04281	7.28592	7.04139	6.55139	6.56503	6.60558	6.85827	7.04844	6.98831	6.04281	7.28592	7.04139	6.55139	6.56503	6.60558	6.85827	7.04844	6.98831	0.0827481	6.77635	0.317587	0.758599	0.880769	-6.6747	NonSig	NonSwitched	Single-promoter
683	ENSG00000100991	TRPC4AP	chr20	35092807	-	FALSE	1	KC-PB.2717.1,KC-PB.2717.2	4.94227	4.94227	4.69798	4.69798	Major	Major	4.9846	4.97284	5.57555	4.23608	5.01022	4.75531	4.61633	4.48966	4.61836	4.9846	4.97284	5.57555	4.23608	5.01022	4.75531	4.61633	4.48966	4.61836	-0.244289	4.80655	-0.954105	0.366845	0.583561	-6.2534	NonSig	NonSwitched	Single-promoter
684	ENSG00000100994	PYGB	chr20	25248072	+	FALSE	1	KC-PB.2702.1,KC-PB.2702.2,KC-PB.2702.3	6.71229	6.71229	5.72828	5.72828	Major	Major	7.20052	6.01896	7.00689	6.62279	5.83818	5.95872	5.07369	5.93321	5.8376	7.20052	6.01896	7.00689	6.62279	5.83818	5.95872	5.07369	5.93321	5.8376	-0.98401	6.16562	-3.43985	0.00827718	0.0670266	-2.69629	NonSig	NonSwitched	Single-promoter
685	ENSG00000101003	GINS1	chr20	25407697	+	FALSE	1	KC-PB.2704.1,KC-PB.2704.2	3.10202	3.10202	4.69833	4.69833	Major	Major	3.56331	3.71823	3.36982	1.75672	4.01504	5.32235	4.69123	4.74195	4.72108	3.56331	3.71823	3.36982	1.75672	4.01504	5.32235	4.69123	4.74195	4.72108	1.59631	3.98886	3.68041	0.00577536	0.0537471	-2.32871	NonSig	NonSwitched	Single-promoter
686	ENSG00000101079	NDRG3	chr20	36746090	-	FALSE	1	KC-PB.2726.1	4.09709	4.09709	4.56853	4.56853	Major	Major	2.68046	4.92551	3.95653	4.82587	4.54259	4.67118	4.27047	5.03428	4.32416	2.68046	4.92551	3.95653	4.82587	4.54259	4.67118	4.27047	5.03428	4.32416	0.471441	4.35901	1.04469	0.325477	0.548666	-6.16429	NonSig	NonSwitched	Single-promoter
687	ENSG00000101084	RAB5IF	chr20	36605783	+	FALSE	1	KC-PB.2727.1	2.41416	2.41416	3.53675	3.53675	Major	Major	0	4.26618	3.63373	1.75672	3.75393	2.66779	3.14445	4.2503	3.86726	0	4.26618	3.63373	1.75672	3.75393	2.66779	3.14445	4.2503	3.86726	1.12259	3.03782	1.34559	0.213846	0.432575	-5.82669	NonSig	NonSwitched	Single-promoter
688	ENSG00000101109	STK4	chr20	44966515	+	FALSE	1	KC-PB.2745.1	4.38753	4.38753	4.21273	4.21273	Major	Major	4.38121	4.97284	2.62936	5.56669	4.54259	4.27489	4.16929	3.96318	4.11372	4.38121	4.97284	2.62936	5.56669	4.54259	4.27489	4.16929	3.96318	4.11372	-0.174792	4.29042	-0.331153	0.748691	0.874949	-6.6699	NonSig	NonSwitched	Single-promoter
689	ENSG00000101152	DNAJC5	chr20	63895144	+	FALSE	1	KC-PB.2771.1	3.50818	3.50818	3.63569	3.63569	Major	Major	3.94751	3.18706	4.37244	2.52571	4.16608	3.72672	3.03368	3.38474	3.86726	3.94751	3.18706	4.37244	2.52571	4.16608	3.72672	3.03368	3.38474	3.86726	0.127517	3.57902	0.320651	0.756357	0.880418	-6.67363	NonSig	NonSwitched	Single-promoter
690	ENSG00000101161	PRPF6	chr20	63981133	+	FALSE	1	KC-PB.2772.1	6.17628	6.17628	5.69668	5.69668	Major	Major	6.79462	5.69131	6.65249	5.56669	6.0666	5.57474	5.88668	5.33975	5.61561	6.79462	5.69131	6.65249	5.56669	6.0666	5.57474	5.88668	5.33975	5.61561	-0.479604	5.90983	-1.58698	0.149617	0.34897	-5.51737	NonSig	NonSwitched	Single-promoter
691	ENSG00000101181	MTG2	chr20	62183039	+	FALSE	1	KC-PB.2768.1	0	0	1.02316	1.02316	Inactive	Major	0	0	0	0	0	2.97901	1.20607	0	0.930726	0	0	0	0	0	2.97901	1.20607	0	0.930726	1.02316	0.568422	1.78154	0.111131	0.295273	-5.24876	NonSig	NonSwitched	Single-promoter
692	ENSG00000101199	ARFGAP1	chr20	63272814	+	FALSE	1	KC-PB.2770.1	4.38927	4.38927	4.43235	4.43235	Major	Major	3.76816	4.1056	5.05149	4.63185	4.64903	4.38463	3.94279	4.11387	5.07144	3.76816	4.1056	5.05149	4.63185	4.64903	4.38463	3.94279	4.11387	5.07144	0.0430774	4.41321	0.133934	0.896629	0.960207	-6.72015	NonSig	NonSwitched	Single-promoter
693	ENSG00000101213	PTK6	chr20	63537346	-	FALSE	1	KC-PB.2773.1,KC-PB.2773.2	4.94698	4.94698	4.67367	4.67367	Major	Major	5.78414	4.54199	4.63591	4.82587	5.26577	4.43651	4.76244	4.64626	4.25737	5.78414	4.54199	4.63591	4.82587	5.26577	4.43651	4.76244	4.64626	4.25737	-0.273307	4.79514	-0.897136	0.394788	0.607564	-6.30612	NonSig	NonSwitched	Single-promoter
694	ENSG00000101224	CDC25B	chr20	3796216	+	FALSE	1	KC-PB.2676.1,KC-PB.2676.2	4.58383	4.58383	6.07893	6.07893	Major	Major	4.50096	4.54199	4.80607	4.4863	6.1231	5.94087	6.33507	6.15801	5.8376	4.50096	4.54199	4.80607	4.4863	6.1231	5.94087	6.33507	6.15801	5.8376	1.4951	5.41444	10.517	4.22417e-06	0.00240978	4.89126	UpReg	NonSwitched	Single-promoter
695	ENSG00000101266	CSNK2A1	chr20	543790	-	FALSE	1	KC-PB.2666.1,KC-PB.2666.2	5.44509	5.44509	5.35609	5.35609	Major	Major	6.08174	5.30417	5.83353	4.56091	5.45372	5.52767	5.2819	5.48512	5.03202	6.08174	5.30417	5.83353	4.56091	5.45372	5.52767	5.2819	5.48512	5.03202	-0.0890009	5.39564	-0.295697	0.774686	0.890375	-6.68203	NonSig	NonSwitched	Single-promoter
696	ENSG00000101294	HM13	chr20	31514452	+	FALSE	1	KC-PB.2706.1	5.24992	5.24992	5.58515	5.58515	Major	Major	4.71422	5.90158	5.09593	5.28793	5.36281	5.50355	6.13495	5.30883	5.61561	4.71422	5.90158	5.09593	5.28793	5.36281	5.50355	6.13495	5.30883	5.61561	0.335233	5.43616	1.25249	0.244347	0.466413	-5.93743	NonSig	NonSwitched	Single-promoter
697	ENSG00000101310	SEC23B	chr20	18507564	+	FALSE	1	KC-PB.2695.1,KC-PB.2695.2,KC-PB.2695.3,KC-PB.2695.4,KC-PB.2695.5	4.43942	4.43942	5.52601	5.52601	Major	Major	4.71422	3.33927	4.13751	5.56669	5.36281	5.97636	5.46381	5.5394	5.28769	4.71422	3.33927	4.13751	5.56669	5.36281	5.97636	5.46381	5.5394	5.28769	1.08659	5.04308	2.66023	0.0277565	0.134617	-3.9156	NonSig	NonSwitched	Single-promoter
698	ENSG00000101311	FERMT1	chr20	6123430	-	FALSE	1	KC-PB.2682.2,KC-PB.2682.1,KC-PB.2682.5,KC-PB.2682.3	4.97759	4.97759	5.30718	5.30718	Major	Major	5.46874	5.06307	5.33718	4.04136	5.16174	5.01625	5.64431	5.0716	5.64203	5.46874	5.06307	5.33718	4.04136	5.16174	5.01625	5.64431	5.0716	5.64203	0.329594	5.1607	1.05866	0.319429	0.543364	-6.14999	NonSig	NonSwitched	Single-promoter
699	ENSG00000101337	TM9SF4	chr20	32109725	+	FALSE	1	KC-PB.2709.1,KC-PB.2709.2	3.91996	3.91996	4.87855	4.87855	Major	Major	3.56331	4.66235	3.04658	4.40762	5.29885	5.04995	4.22076	4.83169	4.9915	3.56331	4.66235	3.04658	4.40762	5.29885	5.04995	4.22076	4.83169	4.9915	0.958586	4.45251	2.61677	0.029734	0.139504	-3.98383	NonSig	NonSwitched	Single-promoter
700	ENSG00000101346	POFUT1	chr20	32207905	+	FALSE	1	KC-PB.2710.1	3.53325	3.53325	3.8462	3.8462	Major	Major	3.56331	4.54199	0	6.0277	3.43488	4.09286	3.81464	4.11387	3.77476	3.56331	4.54199	0	6.0277	3.43488	4.09286	3.81464	4.11387	3.77476	0.312952	3.70711	0.299954	0.771548	0.888517	-6.68064	NonSig	NonSwitched	Single-promoter
701	ENSG00000101361	NOP56	chr20	2652632	+	FALSE	1	KC-PB.2671.1	5.41369	5.41369	6.43513	6.43513	Major	Major	5.87561	5.63358	5.09593	5.04964	7.48738	5.86716	6.9976	6.10501	5.71851	5.87561	5.63358	5.09593	5.04964	7.48738	5.86716	6.9976	6.10501	5.71851	1.02144	5.98116	2.53122	0.0340552	0.14907	-4.11789	NonSig	NonSwitched	Single-promoter
702	ENSG00000101384	JAG1	chr20	10673999	-	FALSE	1	KC-PB.2690.1,KC-PB.2690.2,KC-PB.2690.4	6.61476	6.61476	6.15118	6.15118	Major	Major	6.45236	6.37658	7.09712	6.53298	6.28041	5.84813	6.22593	6.04998	6.35147	6.45236	6.37658	7.09712	6.53298	6.28041	5.84813	6.22593	6.04998	6.35147	-0.463574	6.35722	-2.48943	0.0363913	0.155269	-4.18319	NonSig	NonSwitched	Single-promoter
703	ENSG00000101407	TTI1	chr20	38033438	-	FALSE	1	KC-PB.2732.1	0.909756	0.909756	3.05219	3.05219	Major	Major	0	1.00966	2.62936	0	3.54925	2.83177	2.29902	3.1256	3.45531	0	1.00966	2.62936	0	3.54925	2.83177	2.29902	3.1256	3.45531	2.14243	2.1	3.82802	0.00464864	0.0473521	-2.1064	UpReg	NonSwitched	Single-promoter
704	ENSG00000101413	RPRD1B	chr20	38033515	+	FALSE	1	KC-PB.2730.1,KC-PB.2730.2	5.25386	5.25386	5.54005	5.54005	Major	Major	4.71422	5.85181	5.29967	5.14973	5.29885	5.2945	5.68152	5.89208	5.53331	4.71422	5.85181	5.29967	5.14973	5.29885	5.2945	5.68152	5.89208	5.53331	0.286194	5.41286	1.18579	0.268365	0.49225	-6.01345	NonSig	NonSwitched	Single-promoter
705	ENSG00000101447	FAM83D	chr20	38926417	+	FALSE	1	KC-PB.2733.1	3.04842	3.04842	5.64057	5.64057	Major	Major	4.107	3.47695	2.853	1.75672	5.79247	5.92279	5.94905	5.42872	5.10981	4.107	3.47695	2.853	1.75672	5.79247	5.92279	5.94905	5.42872	5.10981	2.59215	4.4885	5.81008	0.000341492	0.0114529	0.575288	UpReg	NonSwitched	Single-promoter
706	ENSG00000101557	USP14	chr18	158542	+	FALSE	1	KC-PB.2069.1,KC-PB.2069.3,KC-PB.2069.2	5.49141	5.49141	5.98088	5.98088	Major	Major	5.63504	5.47826	5.18091	5.67143	5.88249	5.94087	5.54683	6.35247	6.18175	5.63504	5.47826	5.18091	5.67143	5.88249	5.94087	5.54683	6.35247	6.18175	0.489472	5.76334	2.54893	0.0331113	0.147143	-4.09017	NonSig	NonSwitched	Single-promoter
707	ENSG00000101558	VAPA	chr18	9913995	+	FALSE	1	KC-PB.2081.1,KC-PB.2081.2,KC-PB.2081.3	7.61045	7.61045	7.94278	7.94278	Major	Major	7.39856	7.42003	7.77397	7.84925	7.71272	7.86753	8.3737	7.8034	7.95653	7.39856	7.42003	7.77397	7.84925	7.71272	7.86753	8.3737	7.8034	7.95653	0.332323	7.79508	1.87116	0.0967002	0.270684	-5.12037	NonSig	NonSwitched	Single-promoter
708	ENSG00000101654	RNMT	chr18	13726688	+	FALSE	1	KC-PB.2087.1	3.41977	3.41977	4.44656	4.44656	Major	Major	3.32448	4.18812	3.36982	2.79664	4.30279	4.6272	4.16929	4.1837	4.9498	3.32448	4.18812	3.36982	2.79664	4.30279	4.6272	4.16929	4.1837	4.9498	1.02679	3.99021	3.497	0.00759379	0.0629275	-2.60842	NonSig	NonSwitched	Single-promoter
709	ENSG00000101670	LIPG	chr18	49562057	+	FALSE	1	KC-PB.2132.1,KC-PB.2132.2,KC-PB.2132.3	0.804309	0.804309	2.91146	2.91146	Major	Major	0	0	3.21724	0	2.6675	3.95734	2.63885	1.83831	3.45531	0	0	3.21724	0	2.6675	3.95734	2.63885	1.83831	3.45531	2.10715	1.97495	2.78798	0.0226856	0.120011	-3.71473	NonSig	NonSwitched	Single-promoter
710	ENSG00000101751	POLI	chr18	54269571	+	FALSE	1	KC-PB.2136.1	1.67126	1.67126	1.35853	1.35853	Major	Major	0	1.59783	3.95653	1.13069	0.920075	2.02139	0.725559	3.1256	0	0	1.59783	3.95653	1.13069	0.920075	2.02139	0.725559	3.1256	0	-0.312738	1.49752	-0.354061	0.732072	0.866228	-6.66136	NonSig	NonSwitched	Single-promoter
711	ENSG00000101773	RBBP8	chr18	22914067	+	FALSE	1	KC-PB.2093.1,KC-PB.2093.2	3.47028	7.23606	4.66669	8.50148	Major	Major	4.38121	4.92551	4.57441	0	3.93314	4.7956	4.61633	5.37002	4.61836	6.58506	7.94964	9.46744	4.94209	7.24379	7.90819	8.29031	9.07377	9.99132	1.19641	4.13495	1.23448	0.25065	0.473213	-5.95824	NonSig	NonSwitched	Multi-promoter
712	ENSG00000101773	RBBP8	chr18	22933332	+	FALSE	2	KC-PB.2093.3,KC-PB.2093.4,KC-PB.2093.5	2.75215	7.23606	3.11864	8.50148	Minor	Minor	2.20385	1.00966	2.853	4.94209	3.31065	3.11259	3.67398	2.80951	2.68648	6.58506	7.94964	9.46744	4.94209	7.24379	7.90819	8.29031	9.07377	9.99132	0.36649	2.95576	0.528257	0.611076	0.782838	-6.57854	NonSig	NonSwitched	Multi-promoter
713	ENSG00000101773	RBBP8	chr18	22933858	+	FALSE	3	KC-PB.2093.6,KC-PB.2093.7	1.01362	7.23606	0.716145	8.50148	Minor	Minor	0	2.01447	2.04002	0	0	0	0	0.894243	2.68648	6.58506	7.94964	9.46744	4.94209	7.24379	7.90819	8.29031	9.07377	9.99132	-0.297478	0.848357	-0.41094	0.691466	0.841549	-6.63776	NonSig	NonSwitched	Multi-promoter
714	ENSG00000101782	RIOK3	chr18	23453287	+	FALSE	1	KC-PB.2095.1,KC-PB.2095.2	6.45832	6.45832	6.45621	6.45621	Major	Major	5.96163	6.52684	6.41003	6.93479	6.43717	6.42472	6.84193	6.22579	6.35147	5.96163	6.52684	6.41003	6.93479	6.43717	6.42472	6.84193	6.22579	6.35147	-0.00211069	6.45715	-0.00985271	0.99237	1	-6.72999	NonSig	NonSwitched	Single-promoter
715	ENSG00000101811	CSTF2	chrX	100820391	+	FALSE	1	KC-PB.4616.1	4.12111	4.12111	3.91864	3.91864	Major	Major	4.107	4.1056	3.5078	4.76405	3.84631	3.80776	3.51811	4.64626	3.77476	4.107	4.1056	3.5078	4.76405	3.84631	3.80776	3.51811	4.64626	3.77476	-0.20247	4.00863	-0.673881	0.518612	0.708103	-6.48601	NonSig	NonSwitched	Single-promoter
716	ENSG00000101868	POLA1	chrX	24693900	+	FALSE	1	KC-PB.4567.1	2.12268	2.12268	4.28576	4.28576	Major	Major	3.03811	1.00966	4.44295	0	4.42767	3.72672	4.72727	4.43344	4.11372	3.03811	1.00966	4.44295	0	4.42767	3.72672	4.72727	4.43344	4.11372	2.16308	3.32439	2.61382	0.0298735	0.139737	-3.98847	NonSig	NonSwitched	Single-promoter
717	ENSG00000101871	MID1	chrX	10620585	-	FALSE	1	KC-PB.4549.3,KC-PB.4549.1,KC-PB.4549.2,KC-PB.4549.4,KC-PB.4549.5	0	0	2.67645	2.67645	Inactive	Major	0	0	0	0	2.6675	2.66779	3.43338	2.40413	2.20943	0	0	0	0	2.6675	2.66779	3.43338	2.40413	2.20943	2.67645	1.48692	11.4041	2.23617e-06	0.00240978	5.4721	UpReg	Switched	Single-promoter
718	ENSG00000101935	AMMECR1	chrX	110318093	-	FALSE	1	KC-PB.4637.1	6.61245	6.61245	5.98226	5.98226	Major	Major	6.72254	6.18892	6.49546	7.04287	5.76905	6.33187	6.38104	5.59171	5.8376	6.72254	6.18892	6.49546	7.04287	5.76905	6.33187	6.38104	5.59171	5.8376	-0.63019	6.26234	-2.65259	0.0280945	0.135907	-3.92761	NonSig	NonSwitched	Single-promoter
719	ENSG00000101945	SUV39H1	chrX	48696761	+	FALSE	1	KC-PB.4582.1	1.07944	1.07944	2.69998	2.69998	Major	Major	0	3.18706	0	1.13069	1.87839	2.66779	2.7828	2.97619	3.19474	0	3.18706	0	1.13069	1.87839	2.66779	2.7828	2.97619	3.19474	1.62054	1.97974	2.47748	0.0370888	0.156592	-4.20185	NonSig	NonSwitched	Single-promoter
720	ENSG00000102024	PLS3	chrX	115561192	+	FALSE	1	KC-PB.4634.1,KC-PB.4634.2,KC-PB.4634.3	6.52448	12.1383	7.13918	13.6517	Major	Major	6.29558	6.66293	6.26187	6.87756	7.16746	6.83555	6.80867	7.17385	7.71035	11.6417	12.9487	11.6713	12.2916	13.7727	12.9929	13.0962	13.9445	14.4522	0.614695	6.86598	2.7145	0.0254741	0.128812	-3.83031	NonSig	NonSwitched	Multi-promoter
721	ENSG00000102024	PLS3	chrX	115593555	+	FALSE	2	KC-PB.4634.5	5.61385	12.1383	6.51254	13.6517	Minor	Minor	5.34617	6.2858	5.4094	5.41405	6.60524	6.15733	6.28758	6.77067	6.74186	11.6417	12.9487	11.6713	12.2916	13.7727	12.9929	13.0962	13.9445	14.4522	0.898684	6.11312	3.74909	0.00521869	0.0498722	-2.22494	NonSig	NonSwitched	Multi-promoter
722	ENSG00000102038	SMARCA1	chrX	129523522	-	FALSE	1	KC-PB.4644.1,KC-PB.4644.2	4.03519	4.03519	3.75535	3.75535	Major	Major	4.50096	2.01447	5.13905	4.4863	2.85709	3.88449	3.81464	3.96318	4.25737	4.50096	2.01447	5.13905	4.4863	2.85709	3.88449	3.81464	3.96318	4.25737	-0.279843	3.87972	-0.455483	0.660379	0.821174	-6.61693	NonSig	NonSwitched	Single-promoter
723	ENSG00000102054	RBBP7	chrX	16870141	-	FALSE	1	KC-PB.4555.1	6.79363	6.79363	6.99784	6.99784	Major	Major	6.1566	6.86458	6.63754	7.51582	7.18526	7.0589	7.13139	6.61509	6.99857	6.1566	6.86458	6.63754	7.51582	7.18526	7.0589	7.13139	6.61509	6.99857	0.204206	6.90708	0.766564	0.46447	0.666736	-6.4167	NonSig	NonSwitched	Single-promoter
724	ENSG00000102100	SLC35A2	chrX	48911657	-	FALSE	1	KC-PB.4584.1	2.04709	2.04709	3.55851	3.55851	Major	Major	3.32448	2.82388	2.04002	0	3.93314	2.83177	3.94279	4.04049	3.04437	3.32448	2.82388	2.04002	0	3.93314	2.83177	3.94279	4.04049	3.04437	1.51142	2.88677	2.31657	0.0478942	0.182686	-4.45162	NonSig	NonSwitched	Single-promoter
725	ENSG00000102144	PGK1	chrX	78104196	+	FALSE	1	KC-PB.4612.1	7.93022	7.93022	8.66614	8.66614	Major	Major	8.05593	8.01919	7.90464	7.7411	8.82449	8.91561	8.57006	8.31991	8.70063	8.05593	8.01919	7.90464	7.7411	8.82449	8.91561	8.57006	8.31991	8.70063	0.735926	8.33906	4.81124	0.00118616	0.0236899	-0.702085	NonSig	NonSwitched	Single-promoter
726	ENSG00000102158	MAGT1	chrX	77895444	-	FALSE	1	KC-PB.4613.1,KC-PB.4613.4	6.00003	6.00003	6.41762	6.41762	Major	Major	5.8306	6.24782	6.31923	5.60246	6.55137	6.21789	6.09413	6.48284	6.74186	5.8306	6.24782	6.31923	5.60246	6.55137	6.21789	6.09413	6.48284	6.74186	0.417589	6.23202	2.03879	0.0743565	0.23372	-4.87384	NonSig	NonSwitched	Single-promoter
727	ENSG00000102189	EEA1	chr12	92929318	-	FALSE	1	KC-PB.1130.1	5.06433	5.06433	4.32614	4.32614	Major	Major	4.50096	5.51069	5.09593	5.14973	4.48627	3.88449	4.79676	4.59593	3.86726	4.50096	5.51069	5.09593	5.14973	4.48627	3.88449	4.79676	4.59593	3.86726	-0.738185	4.65422	-2.68042	0.0268842	0.13219	-3.88389	NonSig	NonSwitched	Single-promoter
728	ENSG00000102218	RP2	chrX	46836944	+	FALSE	1	KC-PB.4574.1	3.77629	3.77629	3.85058	3.85058	Major	Major	3.32448	4.1056	3.63373	4.04136	3.02462	3.72672	4.06048	4.1837	4.25737	3.32448	4.1056	3.63373	4.04136	3.02462	3.72672	4.06048	4.1837	4.25737	0.0742874	3.81756	0.254727	0.805099	0.909189	-6.69436	NonSig	NonSwitched	Single-promoter
729	ENSG00000102221	JADE3	chrX	46912551	+	FALSE	1	KC-PB.4575.1	1.43603	1.43603	1.39069	1.39069	Major	Major	0	1.59783	1.62059	2.52571	1.87839	1.7202	1.20607	2.14878	0	0	1.59783	1.62059	2.52571	1.87839	1.7202	1.20607	2.14878	0	-0.045345	1.41084	-0.0774627	0.940081	0.986654	-6.72673	NonSig	NonSwitched	Single-promoter
730	ENSG00000102225	CDK16	chrX	47218721	+	FALSE	1	KC-PB.4578.1	4.70549	4.70549	5.41003	5.41003	Major	Major	5.14026	5.148	5.13905	3.39467	5.26577	5.47902	5.68152	5.37002	5.25382	5.14026	5.148	5.13905	3.39467	5.26577	5.47902	5.68152	5.37002	5.25382	0.70454	5.0969	1.89171	0.0936505	0.264648	-5.09057	NonSig	NonSwitched	Single-promoter
731	ENSG00000102226	USP11	chrX	47233009	+	FALSE	1	KC-PB.4579.1	4.13946	4.13946	4.61686	4.61686	Major	Major	4.9846	3.47695	5.29967	2.79664	4.16608	4.75531	5.46381	4.37494	4.32416	4.9846	3.47695	5.29967	2.79664	4.16608	4.75531	5.46381	4.37494	4.32416	0.477394	4.40468	0.873278	0.406935	0.616648	-6.32741	NonSig	NonSwitched	Single-promoter
732	ENSG00000102241	HTATSF1	chrX	136497230	+	FALSE	1	KC-PB.4658.1,KC-PB.4658.2	0.906959	6.08443	2.46331	8.4538	Minor	Minor	0	2.60103	1.0268	0	1.87839	0.819616	3.43338	3.49871	2.68648	4.38121	7.78968	6.2484	5.91843	7.76088	6.89749	9.70884	9.16549	8.73631	1.55636	1.7716	2.14188	0.0631851	0.215362	-4.71882	NonSig	NonSwitched	Multi-promoter
733	ENSG00000102241	HTATSF1	chrX	136497541	+	TRUE	2	KC-PB.4658.3	5.17747	6.08443	5.99049	8.4538	NA	NA	4.38121	5.18865	5.22159	5.91843	5.88249	6.07787	6.27546	5.66678	6.04983	4.38121	7.78968	6.2484	5.91843	7.76088	6.89749	9.70884	9.16549	8.73631	0.813014	5.62915	2.81218	0.0218373	0.117623	-3.67665	NonSig	NonSwitched	Multi-promoter
734	ENSG00000102384	CENPI	chrX	101098188	+	FALSE	1	KC-PB.4617.1	0	0	0.805582	0.805582	Inactive	Major	0	0	0	0	1.47738	0	0.725559	0.894243	0.930726	0	0	0	0	1.47738	0	0.725559	0.894243	0.930726	0.805582	0.447546	3.05882	0.014847	0.0910019	-3.28904	NonSig	NonSwitched	Single-promoter
735	ENSG00000102390	PBDC1	chrX	76172998	+	FALSE	1	KC-PB.4608.1,KC-PB.4608.2	3.50216	3.50216	4.39142	4.39142	Major	Major	4.25061	2.82388	4.13751	2.79664	3.84631	4.67118	4.11591	4.87455	4.44913	4.25061	2.82388	4.13751	2.79664	3.84631	4.67118	4.11591	4.87455	4.44913	0.889255	3.99619	2.3027	0.0489612	0.185244	-4.47301	NonSig	NonSwitched	Single-promoter
736	ENSG00000102401	ARMCX3	chrX	101623142	+	TRUE	1	KC-PB.4621.1,KC-PB.4621.2	4.97224	4.97224	5.07041	5.07041	NA	NA	5.14026	5.30417	5.51136	3.93316	4.69944	5.64258	4.36501	5.73814	4.90687	5.14026	5.30417	5.51136	3.93316	4.69944	5.64258	4.36501	5.73814	4.90687	0.098169	5.02678	0.240112	0.816036	0.915145	-6.69833	NonSig	NonSwitched	Single-promoter
737	ENSG00000102471	NDFIP2	chr13	79481277	+	FALSE	1	KC-PB.1314.1,KC-PB.1314.2	7.54875	7.54875	6.89974	6.89974	Major	Major	7.58628	7.61162	7.68221	7.3149	6.99655	6.86425	6.89042	6.9814	6.76609	7.58628	7.61162	7.68221	7.3149	6.99655	6.86425	6.89042	6.9814	6.76609	-0.649008	7.18819	-5.38603	0.00056964	0.0147933	0.0515151	NonSig	NonSwitched	Single-promoter
738	ENSG00000102531	FNDC3A	chr13	49110317	+	FALSE	1	KC-PB.1292.1,KC-PB.1292.2	4.43366	4.43366	5.15214	5.15214	Major	Major	4.61153	4.18812	4.04986	4.88515	5.01022	4.53501	5.25746	5.14345	5.81456	4.61153	4.18812	4.04986	4.88515	5.01022	4.53501	5.25746	5.14345	5.81456	0.718475	4.83282	2.56935	0.0320557	0.145223	-4.05819	NonSig	NonSwitched	Single-promoter
739	ENSG00000102547	CAB39L	chr13	49444064	-	FALSE	1	KC-PB.1288.1	1.7847	1.7847	2.0479	2.0479	Major	Major	0	1.00966	4.37244	1.75672	1.87839	2.27043	1.5659	1.83831	2.68648	0	1.00966	4.37244	1.75672	1.87839	2.27043	1.5659	1.83831	2.68648	0.263199	1.93093	0.335685	0.745392	0.873663	-6.66826	NonSig	NonSwitched	Single-promoter
740	ENSG00000102554	KLF5	chr13	73059005	+	FALSE	1	KC-PB.1306.3,KC-PB.1306.2	8.64512	8.64512	8.33915	8.33915	Major	Major	8.57571	8.53096	8.39725	9.07657	8.32379	8.31492	8.18573	8.43176	8.43955	8.57571	8.53096	8.39725	9.07657	8.32379	8.31492	8.18573	8.43176	8.43955	-0.305976	8.47514	-1.93314	0.087779	0.256202	-5.03012	NonSig	NonSwitched	Single-promoter
741	ENSG00000102580	DNAJC3	chr13	95677148	+	FALSE	1	KC-PB.1322.3,KC-PB.1322.2,KC-PB.1322.1	5.39677	5.39677	5.41583	5.41583	Major	Major	4.9846	4.82593	5.57555	6.20101	5.33118	4.7956	5.52652	5.45719	5.96864	4.9846	4.82593	5.57555	6.20101	5.33118	4.7956	5.52652	5.45719	5.96864	0.019057	5.40736	0.0574307	0.955553	0.994699	-6.72822	NonSig	NonSwitched	Single-promoter
742	ENSG00000102595	UGGT2	chr13	96053409	-	FALSE	1	KC-PB.1324.1	3.02323	3.02323	3.44076	3.44076	Major	Major	4.38121	3.33927	4.37244	0	2.6675	3.11259	4.00283	3.38474	4.03615	4.38121	3.33927	4.37244	0	2.6675	3.11259	4.00283	3.38474	4.03615	0.417534	3.25519	0.473198	0.648202	0.811966	-6.60808	NonSig	NonSwitched	Single-promoter
743	ENSG00000102606	ARHGEF7	chr13	111153689	+	FALSE	1	KC-PB.1338.1	4.07202	4.07202	3.68801	3.68801	Major	Major	4.61153	3.60263	3.74954	4.3244	3.17471	3.54956	3.14445	4.31397	4.25737	4.61153	3.60263	3.74954	4.3244	3.17471	3.54956	3.14445	4.31397	4.25737	-0.38401	3.85868	-1.13331	0.288589	0.513285	-6.07119	NonSig	NonSwitched	Single-promoter
744	ENSG00000102699	PARP4	chr13	24512777	-	FALSE	1	KC-PB.1239.1	1.82038	1.82038	2.89927	2.89927	Major	Major	3.56331	3.71823	0	0	3.17471	2.83177	2.29902	2.62101	3.56983	3.56331	3.71823	0	0	3.17471	2.83177	2.29902	2.62101	3.56983	1.07889	2.41977	1.22478	0.254102	0.476556	-5.96937	NonSig	NonSwitched	Single-promoter
745	ENSG00000102753	KPNA3	chr13	49792682	-	FALSE	1	KC-PB.1290.3	6.22665	6.22665	6.02534	6.02534	Major	Major	5.78414	6.14827	6.47878	6.49542	6.31315	6.24724	5.94905	5.69096	5.92627	5.78414	6.14827	6.47878	6.49542	6.31315	6.24724	5.94905	5.69096	5.92627	-0.201317	6.11481	-0.9988	0.345967	0.565477	-6.21022	NonSig	NonSwitched	Single-promoter
746	ENSG00000102858	MGRN1	chr16	4624817	+	FALSE	1	KC-PB.1686.1	3.12539	3.12539	3.1796	3.1796	Major	Major	3.03811	0	5.13905	4.3244	3.43488	3.11259	3.88013	3.26098	2.20943	3.03811	0	5.13905	4.3244	3.43488	3.11259	3.88013	3.26098	2.20943	0.0542156	3.15551	0.0567403	0.956087	0.9947	-6.72827	NonSig	NonSwitched	Single-promoter
747	ENSG00000102870	ZNF629	chr16	30787179	-	FALSE	1	KC-PB.1739.1	4.34923	4.34923	3.51641	3.51641	Major	Major	4.81009	3.60263	4.22014	4.76405	4.42767	4.27489	3.14445	2.40413	3.3309	4.81009	3.60263	4.22014	4.76405	4.42767	4.27489	3.14445	2.40413	3.3309	-0.832819	3.88655	-1.80911	0.106489	0.286361	-5.20955	NonSig	NonSwitched	Single-promoter
748	ENSG00000102893	PHKB	chr16	47461272	+	FALSE	1	KC-PB.1750.1,KC-PB.1750.2,KC-PB.1750.3,KC-PB.1750.4	2.23589	2.23589	3.79888	3.79888	Major	Major	2.68046	4.1056	1.0268	1.13069	3.02462	3.95734	4.22076	3.60434	4.18733	2.68046	4.1056	1.0268	1.13069	3.02462	3.95734	4.22076	3.60434	4.18733	1.56299	3.10422	2.45387	0.0385061	0.16048	-4.23865	NonSig	NonSwitched	Single-promoter
749	ENSG00000102910	LONP2	chr16	48244287	+	FALSE	1	KC-PB.1751.2,KC-PB.1751.3	5.31124	5.31124	4.79876	4.79876	Major	Major	5.91926	5.26668	4.9093	5.14973	4.79527	4.6272	5.15533	4.6949	4.72108	5.91926	5.26668	4.9093	5.14973	4.79527	4.6272	5.15533	4.6949	4.72108	-0.512488	5.02653	-2.34091	0.0460775	0.179133	-4.41403	NonSig	NonSwitched	Single-promoter
750	ENSG00000103005	USB1	chr16	58001407	+	FALSE	1	KC-PB.1768.2,KC-PB.1768.1,KC-PB.1768.3	2.54647	2.54647	3.31671	3.31671	Major	Major	3.94751	3.01687	0	3.22149	3.65521	3.23485	3.74602	3.26098	2.68648	3.94751	3.01687	0	3.22149	3.65521	3.23485	3.74602	3.26098	2.68648	0.770245	2.97438	1.04967	0.323313	0.546541	-6.15921	NonSig	NonSwitched	Single-promoter
751	ENSG00000103018	CYB5B	chr16	69424620	+	FALSE	1	KC-PB.1796.1	6.52203	6.52203	6.34625	6.34625	Major	Major	6.26207	6.54261	6.57611	6.70734	6.3919	6.17271	6.36969	6.35247	6.44447	6.26207	6.54261	6.57611	6.70734	6.3919	6.17271	6.36969	6.35247	6.44447	-0.175785	6.42438	-1.37327	0.205428	0.421792	-5.79278	NonSig	NonSwitched	Single-promoter
752	ENSG00000103037	SETD6	chr16	58515516	+	FALSE	1	KC-PB.1775.1	2.46947	2.46947	2.87886	2.87886	Major	Major	0	3.60263	3.74954	2.52571	3.02462	3.23485	2.63885	2.80951	2.68648	0	3.60263	3.74954	2.52571	3.02462	3.23485	2.63885	2.80951	2.68648	0.409393	2.69691	0.574205	0.580972	0.757928	-6.55157	NonSig	NonSwitched	Single-promoter
753	ENSG00000103042	SLC38A7	chr16	58684745	-	FALSE	1	KC-PB.1772.1	1.51374	1.51374	2.76192	2.76192	Major	Major	3.03811	3.01687	0	0	2.19183	2.83177	2.47892	2.97619	3.3309	3.03811	3.01687	0	0	2.19183	2.83177	2.47892	2.97619	3.3309	1.24818	2.20718	1.69125	0.127686	0.31729	-5.37527	NonSig	NonSwitched	Single-promoter
754	ENSG00000103043	VAC14	chr16	70801158	-	FALSE	1	KC-PB.1803.1,KC-PB.1803.2	5.0459	5.0459	4.8692	4.8692	Major	Major	4.38121	4.97284	5.33718	5.49239	4.48627	4.8348	5.46381	4.48966	5.07144	4.38121	4.97284	5.33718	5.49239	4.48627	4.8348	5.46381	4.48966	5.07144	-0.176708	4.94773	-0.6066	0.560252	0.741157	-6.53131	NonSig	NonSwitched	Single-promoter
755	ENSG00000103047	TANGO6	chr16	68843534	+	FALSE	1	KC-PB.1790.1	1.74325	1.74325	3.1121	3.1121	Major	Major	0	3.33927	3.63373	0	3.02462	3.64086	2.09346	3.1256	3.67594	0	3.33927	3.63373	0	3.02462	3.64086	2.09346	3.1256	3.67594	1.36885	2.50372	1.57561	0.152204	0.351583	-5.53258	NonSig	NonSwitched	Single-promoter
756	ENSG00000103051	COG4	chr16	70523551	-	FALSE	1	KC-PB.1802.1,KC-PB.1802.2	4.51557	4.51557	5.02962	5.02962	Major	Major	4.89998	4.71896	4.51018	3.93316	5.04962	5.01625	4.98716	4.74195	5.35312	4.89998	4.71896	4.51018	3.93316	5.04962	5.01625	4.98716	4.74195	5.35312	0.514049	4.80115	2.36753	0.0441688	0.174928	-4.37282	NonSig	NonSwitched	Single-promoter
757	ENSG00000103061	SLC7A6OS	chr16	68310946	-	FALSE	1	KC-PB.1788.1	3.04076	3.04076	3.97523	3.97523	Major	Major	2.20385	3.47695	3.95653	2.52571	4.30279	4.3308	3.24733	3.88148	4.11372	2.20385	3.47695	3.95653	2.52571	4.30279	4.3308	3.24733	3.88148	4.11372	0.934466	3.55991	2.34611	0.0456983	0.178133	-4.40599	NonSig	NonSwitched	Single-promoter
758	ENSG00000103066	PLA2G15	chr16	68245376	+	FALSE	1	KC-PB.1786.1	4.66837	4.66837	4.3257	4.3257	Major	Major	5.52633	3.92487	5.18091	4.04136	4.36658	4.21673	4.53732	4.1837	4.32416	5.52633	3.92487	5.18091	4.04136	4.36658	4.21673	4.53732	4.1837	4.32416	-0.342671	4.478	-0.999626	0.34559	0.56512	-6.20941	NonSig	NonSwitched	Single-promoter
759	ENSG00000103067	ESRP2	chr16	68236164	-	FALSE	1	KC-PB.1785.1,KC-PB.1785.2,KC-PB.1785.3,KC-PB.1785.4	5.42688	5.42688	5.2124	5.2124	Major	Major	5.78414	5.41112	5.13905	5.37322	5.56667	5.1774	5.2073	4.6949	5.41572	5.78414	5.41112	5.13905	5.37322	5.56667	5.1774	5.2073	4.6949	5.41572	-0.214485	5.30772	-1.02906	0.332348	0.551844	-6.18011	NonSig	NonSwitched	Single-promoter
760	ENSG00000103091	WDR59	chr16	74985123	-	FALSE	1	KC-PB.1813.1	2.93717	2.93717	3.75564	3.75564	Major	Major	3.32448	4.18812	0	4.23608	4.01504	3.95734	3.24733	3.60434	3.95417	3.32448	4.18812	0	4.23608	4.01504	3.95734	3.24733	3.60434	3.95417	0.818473	3.39188	0.992451	0.348877	0.568925	-6.21645	NonSig	NonSwitched	Single-promoter
761	ENSG00000103148	NPRL3	chr16	138670	-	FALSE	1	KC-PB.1665.1	4.58694	4.58694	4.43398	4.43398	Major	Major	4.38121	5.18865	4.63591	4.142	4.23606	5.11508	3.67398	4.37494	4.76981	4.38121	5.18865	4.63591	4.142	4.23606	5.11508	3.67398	4.37494	4.76981	-0.152967	4.50196	-0.470798	0.649845	0.812376	-6.6093	NonSig	NonSwitched	Single-promoter
762	ENSG00000103160	HSDL1	chr16	84145191	-	FALSE	1	KC-PB.1829.1	1.75014	1.75014	3.05854	3.05854	Major	Major	0	3.01687	2.853	1.13069	2.85709	3.80776	3.03368	3.38474	2.20943	0	3.01687	2.853	1.13069	2.85709	3.80776	3.03368	3.38474	2.20943	1.3084	2.47703	2.01063	0.0777274	0.238359	-4.91578	NonSig	NonSwitched	Single-promoter
763	ENSG00000103168	TAF1C	chr16	84187052	-	FALSE	1	KC-PB.1830.1	1.05158	1.05158	1.48251	1.48251	Major	Major	0	2.01447	0	2.19185	0	2.27043	3.24733	0	1.8948	0	2.01447	0	2.19185	0	2.27043	3.24733	0	1.8948	0.430931	1.29099	0.516779	0.618723	0.787808	-6.58495	NonSig	NonSwitched	Single-promoter
764	ENSG00000103194	USP10	chr16	84700004	+	FALSE	1	KC-PB.1834.2,KC-PB.1834.1,KC-PB.1834.3	5.53355	5.53355	6.26836	6.26836	Major	Major	5.28074	5.94968	5.37374	5.53002	5.79247	6.29018	6.3467	6.7128	6.19965	5.28074	5.94968	5.37374	5.53002	5.79247	6.29018	6.3467	6.7128	6.19965	0.734812	5.94178	3.42404	0.00847748	0.0680194	-2.72066	NonSig	NonSwitched	Single-promoter
765	ENSG00000103197	TSC2	chr16	2047978	+	FALSE	1	KC-PB.1674.1	3.13444	3.13444	2.21809	2.21809	Major	Major	2.68046	2.82388	3.21724	3.81619	3.17471	3.54956	0.725559	2.14878	1.49184	2.68046	2.82388	3.21724	3.81619	3.17471	3.54956	0.725559	2.14878	1.49184	-0.916352	2.62536	-1.56258	0.155218	0.355771	-5.54994	NonSig	NonSwitched	Single-promoter
766	ENSG00000103249	CLCN7	chr16	1475025	-	FALSE	1	KC-PB.1670.2	4.5326	4.5326	3.88977	3.88977	Major	Major	4.89998	5.34071	3.95653	3.93316	4.16608	4.15612	3.14445	3.79489	4.18733	4.89998	5.34071	3.95653	3.93316	4.16608	4.15612	3.14445	3.79489	4.18733	-0.642821	4.17547	-1.77381	0.112466	0.297482	-5.25971	NonSig	NonSwitched	Single-promoter
767	ENSG00000103257	SLC7A5	chr16	87834513	-	TRUE	4	KC-PB.1841.6	5.82224	26.0062	7.02256	28.8647	NA	NA	5.68647	6.30442	4.57441	6.72367	7.26274	6.8161	7.62251	6.56363	6.84782	25.0833	27.0171	22.9737	28.9509	29.1207	29.126	30.5393	26.634	28.9036	1.20032	6.48909	2.77172	0.0232744	0.122216	-3.74031	NonSig	NonSwitched	Multi-promoter
768	ENSG00000103257	SLC7A5	chr16	87836556	-	TRUE	3	KC-PB.1841.5	6.60983	26.0062	7.09285	28.8647	NA	NA	6.39168	7.10658	5.63699	7.30408	7.10338	7.28801	7.55392	6.24224	7.27668	25.0833	27.0171	22.9737	28.9509	29.1207	29.126	30.5393	26.634	28.9036	0.483014	6.87817	1.22423	0.254298	0.476556	-5.97	NonSig	NonSwitched	Multi-promoter
769	ENSG00000103257	SLC7A5	chr16	87838733	-	TRUE	2	KC-PB.1841.10	6.52824	26.0062	7.22103	28.8647	NA	NA	6.11966	6.47847	6.30036	7.21447	7.24588	7.35695	7.54385	6.72456	7.2339	25.0833	27.0171	22.9737	28.9509	29.1207	29.126	30.5393	26.634	28.9036	0.692787	6.91312	2.70294	0.0259437	0.129991	-3.84849	NonSig	NonSwitched	Multi-promoter
770	ENSG00000103257	SLC7A5	chr16	87869505	-	FALSE	1	KC-PB.1841.1,KC-PB.1841.8	7.04591	26.0062	7.52828	28.8647	Major	Major	6.88545	7.12765	6.4619	7.70865	7.50874	7.66493	7.81902	7.10353	7.54518	25.0833	27.0171	22.9737	28.9509	29.1207	29.126	30.5393	26.634	28.9036	0.48237	7.31389	1.85567	0.0990611	0.273589	-5.14274	NonSig	NonSwitched	Multi-promoter
771	ENSG00000103264	FBXO31	chr16	87383754	-	FALSE	1	KC-PB.1837.1	5.40885	5.40885	4.67789	4.67789	Major	Major	5.78414	5.18865	5.09593	5.56669	5.26577	4.75531	4.00283	4.6949	4.67063	5.78414	5.18865	5.09593	5.56669	5.26577	4.75531	4.00283	4.6949	4.67063	-0.730964	5.00276	-2.78678	0.0227286	0.12006	-3.71662	NonSig	NonSwitched	Single-promoter
772	ENSG00000103275	UBE2I	chr16	1309636	+	FALSE	1	KC-PB.1669.1	6.1338	6.1338	6.09366	6.09366	Major	Major	6.29558	5.80027	6.26187	6.17749	6.56503	5.97636	5.77058	6.0869	6.06943	6.29558	5.80027	6.26187	6.17749	6.56503	5.97636	5.77058	6.0869	6.06943	-0.0401434	6.1115	-0.21396	0.835714	0.92515	-6.70484	NonSig	NonSwitched	Single-promoter
773	ENSG00000103342	GSPT1	chr16	11915979	-	FALSE	1	KC-PB.1697.1,KC-PB.1697.2	7.0976	7.0976	7.53035	7.53035	Major	Major	7.45897	6.88946	6.92304	7.11892	7.40623	7.62636	7.55392	7.2409	7.82434	7.45897	6.88946	6.92304	7.11892	7.40623	7.62636	7.55392	7.2409	7.82434	0.432753	7.33801	2.49847	0.0358728	0.154019	-4.16908	NonSig	NonSwitched	Single-promoter
774	ENSG00000103351	CLUAP1	chr16	3500986	+	FALSE	1	KC-PB.1683.1	2.29874	2.29874	3.36222	3.36222	Major	Major	3.32448	2.82388	3.04658	0	3.75393	3.80776	3.24733	3.1256	2.8765	3.32448	2.82388	3.04658	0	3.75393	3.80776	3.24733	3.1256	2.8765	1.06349	2.88956	1.62082	0.142149	0.338021	-5.47176	NonSig	NonSwitched	Single-promoter
775	ENSG00000103353	UBFD1	chr16	23557727	+	FALSE	1	KC-PB.1724.1	1.31338	1.31338	2.71825	2.71825	Major	Major	2.20385	1.00966	2.04002	0	3.17471	1.7202	3.03368	2.97619	2.68648	2.20385	1.00966	2.04002	0	3.17471	1.7202	3.03368	2.97619	2.68648	1.40487	2.09387	2.80091	0.0222282	0.118897	-3.69438	NonSig	NonSwitched	Single-promoter
776	ENSG00000103356	EARS2	chr16	23557362	-	FALSE	1	KC-PB.1726.1,KC-PB.1726.2	3.98584	3.98584	3.1129	3.1129	Major	Major	3.76816	4.26618	4.22014	3.6889	3.02462	3.34756	3.59815	3.38474	2.20943	3.76816	4.26618	4.22014	3.6889	3.02462	3.34756	3.59815	3.38474	2.20943	-0.872944	3.50088	-2.9594	0.0173347	0.100693	-3.4451	NonSig	NonSwitched	Single-promoter
777	ENSG00000103365	GGA2	chr16	23510494	-	FALSE	1	KC-PB.1722.1,KC-PB.1722.2,KC-PB.1722.3	5.55841	5.55841	4.84943	4.84943	Major	Major	5.63504	5.30417	6.00647	5.28793	5.01022	5.08288	4.8951	5.0716	4.18733	5.63504	5.30417	6.00647	5.28793	5.01022	5.08288	4.8951	5.0716	4.18733	-0.708979	5.16453	-2.95061	0.0175745	0.101021	-3.45892	NonSig	NonSwitched	Single-promoter
778	ENSG00000103381	CPPED1	chr16	12803886	-	FALSE	1	KC-PB.1699.1	4.0633	4.0633	3.58023	3.58023	Major	Major	3.32448	3.92487	4.44295	4.56091	4.23606	4.4866	2.91369	2.80951	3.45531	3.32448	3.92487	4.44295	4.56091	4.23606	4.4866	2.91369	2.80951	3.45531	-0.483072	3.79493	-1.12519	0.291825	0.516125	-6.07996	NonSig	NonSwitched	Single-promoter
779	ENSG00000103423	DNAJA3	chr16	4425868	+	FALSE	1	KC-PB.1684.1,KC-PB.4483.1	0	0	0	0	Inactive	Inactive	0	0	0	0	0	0	0	0	0	0	0	0	0	0	0	0	0	0	0	0	0	1	1	-6.73005	NonSig	NonSwitched	Single-promoter
780	ENSG00000103429	BFAR	chr16	14632962	+	FALSE	1	KC-PB.1702.2	0	0	0	0	Inactive	Inactive	0	0	0	0	0	0	0	0	0	0	0	0	0	0	0	0	0	0	0	0	0	1	1	-6.73005	NonSig	NonSwitched	Single-promoter
781	ENSG00000103479	RBL2	chr16	53434460	+	FALSE	1	KC-PB.1758.1,KC-PB.1758.2	5.43632	5.43632	4.73511	4.73511	Major	Major	5.46874	5.85181	5.05149	5.37322	4.69944	4.75531	4.61633	4.78752	4.81696	5.46874	5.85181	5.05149	5.37322	4.69944	4.75531	4.61633	4.78752	4.81696	-0.701206	5.04676	-4.24027	0.00257727	0.0363257	-1.50057	NonSig	NonSwitched	Single-promoter
782	ENSG00000103494	RPGRIP1L	chr16	53703889	-	FALSE	1	KC-PB.1760.1	0.256701	0.256701	2.48034	2.48034	Major	Major	0	0	1.0268	0	0.920075	2.83177	2.47892	2.97619	3.19474	0	0	1.0268	0	0.920075	2.83177	2.47892	2.97619	3.19474	2.22364	1.49206	4.63909	0.00149131	0.0276126	-0.937654	UpReg	NonSwitched	Single-promoter
783	ENSG00000103544	VPS35L	chr16	19555717	+	FALSE	1	KC-PB.1712.1	2.54572	2.54572	4.15817	4.15817	Major	Major	0	2.82388	4.13751	3.22149	5.01022	3.64086	4.45374	3.49871	4.18733	0	2.82388	4.13751	3.22149	5.01022	3.64086	4.45374	3.49871	4.18733	1.61245	3.44153	2.07297	0.0704554	0.228055	-4.82271	NonSig	NonSwitched	Single-promoter
784	ENSG00000103549	RNF40	chr16	30762312	+	FALSE	1	KC-PB.1738.2,KC-PB.1738.1,KC-PB.1738.3	4.98142	4.98142	4.97068	4.97068	Major	Major	5.58171	4.1056	4.63591	5.60246	5.01022	5.01625	5.04542	4.83169	4.9498	5.58171	4.1056	4.63591	5.60246	5.01022	5.01625	5.04542	4.83169	4.9498	-0.0107414	4.97545	-0.0343113	0.973435	1	-6.7294	NonSig	NonSwitched	Single-promoter
785	ENSG00000103591	AAGAB	chr15	67254665	-	FALSE	1	KC-PB.1608.1	4.77164	4.77164	5.38328	5.38328	Major	Major	5.21221	4.87658	4.2983	4.69946	5.56667	5.23714	5.15533	5.73814	5.21915	5.21221	4.87658	4.2983	4.69946	5.56667	5.23714	5.15533	5.73814	5.21915	0.611646	5.11144	2.85644	0.0203691	0.111747	-3.607	NonSig	NonSwitched	Single-promoter
786	ENSG00000103852	TTC23	chr15	99249581	-	FALSE	1	KC-PB.1658.1	1.41156	1.41156	1.1131	1.1131	Major	Major	0	3.01687	2.62936	0	0.920075	0	1.5659	2.14878	0.930726	0	3.01687	2.62936	0	0.920075	0	1.5659	2.14878	0.930726	-0.29846	1.24575	-0.391324	0.70536	0.850595	-6.64628	NonSig	NonSwitched	Single-promoter
787	ENSG00000103855	CD276	chr15	73684244	+	FALSE	1	KC-PB.1619.1,KC-PB.1619.2	3.7358	3.7358	2.68941	2.68941	Major	Major	4.107	3.47695	3.21724	4.142	2.19183	3.23485	3.24733	1.44216	3.3309	4.107	3.47695	3.21724	4.142	2.19183	3.23485	3.24733	1.44216	3.3309	-1.04639	3.15447	-2.36899	0.0440666	0.174928	-4.37056	NonSig	NonSwitched	Single-promoter
788	ENSG00000103966	EHD4	chr15	41972555	-	FALSE	1	KC-PB.1543.1,KC-PB.1543.2	4.74728	4.74728	5.28231	5.28231	Major	Major	5.06452	4.18812	4.63591	5.10055	5.64593	4.91014	5.25746	5.27724	5.32078	5.06452	4.18812	4.63591	5.10055	5.64593	4.91014	5.25746	5.27724	5.32078	0.535031	5.04452	2.32807	0.0470267	0.180931	-4.43386	NonSig	NonSwitched	Single-promoter
789	ENSG00000103995	CEP152	chr15	48811069	-	FALSE	1	KC-PB.1559.1	1.02352	1.02352	2.78824	2.78824	Major	Major	0	2.33736	0	1.75672	3.84631	2.27043	2.63885	2.97619	2.20943	0	2.33736	0	1.75672	3.84631	2.27043	2.63885	2.97619	2.20943	1.76473	2.00392	3.02896	0.0155525	0.0948051	-3.33587	NonSig	NonSwitched	Single-promoter
790	ENSG00000104164	BLOC1S6	chr15	45587349	+	FALSE	1	KC-PB.1560.1,KC-PB.1560.2,KC-PB.1560.3	4.55312	4.55312	6.02408	6.02408	Major	Major	3.03811	5.54241	4.80607	4.82587	6.2126	5.99378	6.16153	5.78382	5.96864	3.03811	5.54241	4.80607	4.82587	6.2126	5.99378	6.16153	5.78382	5.96864	1.47096	5.37032	3.30014	0.0102354	0.0742592	-2.91238	NonSig	NonSwitched	Single-promoter
791	ENSG00000104205	SGK3	chr8	66775205	+	FALSE	1	KC-PB.4202.1	2.54839	2.54839	1.95505	1.95505	Major	Major	3.03811	3.33927	0	3.81619	1.87839	0.819616	3.03368	2.14878	1.8948	3.03811	3.33927	0	3.81619	1.87839	0.819616	3.03368	2.14878	1.8948	-0.593341	2.21876	-0.74951	0.474145	0.674234	-6.43004	NonSig	NonSwitched	Single-promoter
792	ENSG00000104218	CSPP1	chr8	67064379	+	FALSE	1	KC-PB.4203.1	2.10965	2.10965	2.78057	2.78057	Major	Major	2.20385	2.60103	3.63373	0	3.54925	3.23485	2.09346	2.14878	2.8765	2.20385	2.60103	3.63373	0	3.54925	3.23485	2.09346	2.14878	2.8765	0.670916	2.48238	0.970817	0.358931	0.577114	-6.23744	NonSig	NonSwitched	Single-promoter
793	ENSG00000104290	FZD3	chr8	28494225	+	FALSE	1	KC-PB.4148.1	0.256701	0.256701	0.663249	0.663249	Major	Major	0	0	1.0268	0	0	0.819616	1.5659	0	0.930726	0	0	1.0268	0	0	0.819616	1.5659	0	0.930726	0.406548	0.482561	1.05819	0.319633	0.543364	-6.15048	NonSig	NonSwitched	Single-promoter
794	ENSG00000104320	NBN	chr8	89984672	-	FALSE	1	KC-PB.4218.1,KC-PB.4218.2,KC-PB.4218.3	3.68714	3.68714	4.5961	4.5961	Major	Major	3.56331	4.26618	3.36982	3.54927	5.29885	3.80776	4.36501	4.64626	4.86261	3.56331	4.26618	3.36982	3.54927	5.29885	3.80776	4.36501	4.64626	4.86261	0.908954	4.19212	2.86346	0.020146	0.111506	-3.59597	NonSig	NonSwitched	Single-promoter
795	ENSG00000104332	SFRP1	chr8	41309472	-	FALSE	1	KC-PB.4175.2	5.45055	5.45055	5.62198	5.62198	Major	Major	5.46874	6.18892	6.92304	3.22149	5.08797	5.97636	6.00884	6.0869	4.9498	5.46874	6.18892	6.92304	3.22149	5.08797	5.97636	6.00884	6.0869	4.9498	0.171429	5.54578	0.245177	0.812241	0.912389	-6.69698	NonSig	NonSwitched	Single-promoter
796	ENSG00000104343	UBE2W	chr8	73878848	-	FALSE	1	KC-PB.4213.1	2.43724	2.43724	2.69588	2.69588	Major	Major	3.32448	2.60103	1.0268	2.79664	3.02462	2.66779	1.20607	3.1256	3.45531	3.32448	2.60103	1.0268	2.79664	3.02462	2.66779	1.20607	3.1256	3.45531	0.258641	2.58093	0.448111	0.665478	0.824887	-6.62052	NonSig	NonSwitched	Single-promoter
797	ENSG00000104356	POP1	chr8	98117304	+	FALSE	1	KC-PB.4236.1,KC-PB.4236.3,KC-PB.4236.2	0.584339	0.584339	2.00851	2.00851	Major	Major	0	2.33736	0	0	2.19183	1.7202	2.47892	1.44216	2.20943	0	2.33736	0	0	2.19183	1.7202	2.47892	1.44216	2.20943	1.42417	1.37554	2.75592	0.0238615	0.124017	-3.76516	NonSig	NonSwitched	Single-promoter
798	ENSG00000104361	NIPAL2	chr8	98294204	-	FALSE	1	KC-PB.4234.1	6.58254	6.58254	5.4224	5.4224	Major	Major	6.88545	6.55821	6.28124	6.60527	5.33118	5.34967	5.39825	5.61717	5.41572	6.88545	6.55821	6.28124	6.60527	5.33118	5.34967	5.39825	5.61717	5.41572	-1.16015	5.93802	-7.97995	3.49688e-05	0.00388482	2.86755	DownReg	NonSwitched	Single-promoter
799	ENSG00000104375	STK3	chr8	98825689	-	FALSE	1	KC-PB.4235.1	2.70082	2.70082	4.76725	4.76725	Major	Major	0	4.41067	4.63591	1.75672	4.64903	4.53501	4.72727	5.10797	4.81696	0	4.41067	4.63591	1.75672	4.64903	4.53501	4.72727	5.10797	4.81696	2.06643	3.84884	2.28272	0.0505391	0.189123	-4.50376	NonSig	NonSwitched	Single-promoter
800	ENSG00000104388	RAB2A	chr8	60516984	+	FALSE	1	KC-PB.4195.1,KC-PB.4195.2	7.41174	7.41174	7.34021	7.34021	Major	Major	6.45236	7.46209	7.85378	7.87872	7.55054	7.27382	7.30241	7.28922	7.28509	6.45236	7.46209	7.85378	7.87872	7.55054	7.27382	7.30241	7.28922	7.28509	-0.0715261	7.372	-0.247551	0.810464	0.912268	-6.69634	NonSig	NonSwitched	Single-promoter
801	ENSG00000104408	EIF3E	chr8	108248724	-	FALSE	1	KC-PB.4253.1	9.66976	9.66976	10.2739	10.2739	Major	Major	9.06298	10.1766	9.70948	9.72998	10.2225	10.2312	10.0942	10.5755	10.2461	9.06298	10.1766	9.70948	9.72998	10.2225	10.2312	10.0942	10.5755	10.2461	0.604126	10.0054	2.71996	0.0252553	0.128078	-3.82173	NonSig	NonSwitched	Single-promoter
802	ENSG00000104413	ESRP1	chr8	94641157	+	FALSE	1	KC-PB.4226.1,KC-PB.4226.2	8.314	8.314	7.56788	7.56788	Major	Major	8.56888	8.22865	8.19759	8.26086	7.58447	7.59816	7.70164	7.39604	7.55911	8.56888	8.22865	8.19759	8.26086	7.58447	7.59816	7.70164	7.39604	7.55911	-0.746113	7.89949	-5.93111	0.00029639	0.0111037	0.719879	NonSig	NonSwitched	Single-promoter
803	ENSG00000104419	NDRG1	chr8	133297252	-	FALSE	1	KC-PB.4271.1	8.92494	8.92494	9.35674	9.35674	Major	Major	9.02852	8.75393	8.53275	9.38454	9.15766	9.44045	9.28651	9.30792	9.59115	9.02852	8.75393	8.53275	9.38454	9.15766	9.44045	9.28651	9.30792	9.59115	0.431801	9.16482	2.27166	0.051435	0.190868	-4.52078	NonSig	NonSwitched	Single-promoter
804	ENSG00000104427	ZC2HC1A	chr8	78666080	+	FALSE	1	KC-PB.4211.1,KC-PB.4211.2,KC-PB.4211.3	5.22196	5.22196	5.3779	5.3779	Major	Major	4.9846	5.01866	5.51136	5.37322	5.12533	5.5514	4.95712	5.51251	5.74313	4.9846	5.01866	5.51136	5.37322	5.12533	5.5514	4.95712	5.51251	5.74313	0.155936	5.30859	0.758942	0.468778	0.671436	-6.42269	NonSig	NonSwitched	Single-promoter
805	ENSG00000104442	ARMC1	chr8	65634176	-	FALSE	1	KC-PB.4200.1,KC-PB.4200.2	4.63854	4.63854	5.54065	5.54065	Major	Major	3.56331	5.66273	4.44295	4.88515	5.36281	5.40281	5.50592	5.61717	5.81456	3.56331	5.66273	4.44295	4.88515	5.36281	5.40281	5.50592	5.61717	5.81456	0.902116	5.13971	2.4126	0.0411163	0.167624	-4.30289	NonSig	NonSwitched	Single-promoter
806	ENSG00000104517	UBR5	chr8	102412719	-	FALSE	1	KC-PB.4243.1	5.79442	5.79442	5.59615	5.59615	Major	Major	5.96163	5.69131	5.72452	5.80021	5.45372	5.94087	5.2819	5.39967	5.90461	5.96163	5.69131	5.72452	5.80021	5.45372	5.94087	5.2819	5.39967	5.90461	-0.198264	5.68427	-1.12963	0.290053	0.514284	-6.07517	NonSig	NonSwitched	Single-promoter
807	ENSG00000104549	SQLE	chr8	124998505	+	FALSE	1	KC-PB.4265.1,KC-PB.4265.2	7.5841	7.5841	6.97638	6.97638	Major	Major	7.87934	7.3767	7.02998	8.05039	6.59196	6.7561	7.17118	6.94165	7.42099	7.87934	7.3767	7.02998	8.05039	6.59196	6.7561	7.17118	6.94165	7.42099	-0.607725	7.24648	-2.34656	0.0456652	0.178133	-4.40528	NonSig	NonSwitched	Single-promoter
808	ENSG00000104611	SH2D4A	chr8	19314004	+	FALSE	1	KC-PB.4120.1	0	0	0	0	Inactive	Inactive	0	0	0	0	0	0	0	0	0	0	0	0	0	0	0	0	0	0	0	0	0	1	1	-6.73005	NonSig	NonSwitched	Single-promoter
809	ENSG00000104626	ERI1	chr8	9002897	+	FALSE	1	KC-PB.4109.1	3.19449	3.19449	3.3265	3.3265	Major	Major	3.32448	3.60263	2.62936	3.22149	3.31065	3.23485	3.24733	3.96318	2.8765	3.32448	3.60263	2.62936	3.22149	3.31065	3.23485	3.24733	3.96318	2.8765	0.132012	3.26783	0.502006	0.628638	0.79567	-6.593	NonSig	NonSwitched	Single-promoter
810	ENSG00000104635	SLC39A14	chr8	22367276	+	FALSE	1	KC-PB.4124.1,KC-PB.4124.2	3.5702	3.5702	3.24859	3.24859	Major	Major	3.56331	4.1056	3.21724	3.39467	4.23606	3.45209	3.24733	2.62101	2.68648	3.56331	4.1056	3.21724	3.39467	4.23606	3.45209	3.24733	2.62101	2.68648	-0.32161	3.39153	-0.908415	0.389137	0.603834	-6.2959	NonSig	NonSwitched	Single-promoter
811	ENSG00000104643	MTMR9	chr8	11284508	+	FALSE	1	KC-PB.4112.1,KC-PB.4112.2	4.40827	4.40827	4.67738	4.67738	Major	Major	4.38121	4.92551	4.51018	3.81619	4.74815	3.95734	5.12863	4.83169	4.72108	4.38121	4.92551	4.51018	3.81619	4.74815	3.95734	5.12863	4.83169	4.72108	0.269104	4.55778	0.934418	0.376332	0.589626	-6.27192	NonSig	NonSwitched	Single-promoter
812	ENSG00000104679	R3HCC1	chr8	23288108	+	FALSE	1	KC-PB.4131.1	2.21971	2.21971	3.2606	3.2606	Major	Major	3.32448	1.59783	3.95653	0	3.65521	3.45209	3.34335	3.38474	2.46759	3.32448	1.59783	3.95653	0	3.65521	3.45209	3.34335	3.38474	2.46759	1.04089	2.79798	1.38005	0.203412	0.419449	-5.78441	NonSig	NonSwitched	Single-promoter
813	ENSG00000104689	TNFRSF10A	chr8	23225128	-	FALSE	1	KC-PB.4130.1,KC-PB.4130.3	4.09938	4.09938	3.22985	3.22985	Major	Major	4.107	4.18812	3.21724	4.88515	2.6675	3.45209	3.59815	2.97619	3.45531	4.107	4.18812	3.21724	4.88515	2.6675	3.45209	3.59815	2.97619	3.45531	-0.86953	3.61631	-2.53844	0.033667	0.14831	-4.10659	NonSig	NonSwitched	Single-promoter
814	ENSG00000104723	TUSC3	chr8	15540244	+	FALSE	1	KC-PB.4117.1	2.59251	2.59251	3.85373	3.85373	Major	Major	0	3.18706	3.63373	3.54927	3.93314	2.48275	4.00283	3.70276	5.14718	0	3.18706	3.63373	3.54927	3.93314	2.48275	4.00283	3.70276	5.14718	1.26122	3.29319	1.51612	0.166409	0.370277	-5.61119	NonSig	NonSwitched	Single-promoter
815	ENSG00000104738	MCM4	chr8	47960917	+	TRUE	1	KC-PB.4183.1,KC-PB.4183.5,KC-PB.4183.6,KC-PB.4183.8,KC-PB.4183.9	5.8721	18.0362	5.88384	20.4645	NA	NA	6.36035	6.08506	4.75155	6.29143	6.04727	6.011	5.85445	5.97319	5.53331	17.9617	18.6976	17.8547	17.6306	20.085	20.7817	20.6968	20.5609	20.1982	0.0117434	5.87862	0.0353566	0.972626	1	-6.72936	NonSig	NonSwitched	Multi-promoter
816	ENSG00000104738	MCM4	chr8	47962779	+	TRUE	2	KC-PB.4183.10	5.52392	18.0362	6.76564	20.4645	NA	NA	5.40876	5.66273	6.39232	4.63185	6.63145	6.8161	6.77463	6.72456	6.88147	17.9617	18.6976	17.8547	17.6306	20.085	20.7817	20.6968	20.5609	20.1982	1.24172	6.21376	4.01451	0.00354921	0.0416417	-1.82947	UpReg	NonSwitched	Multi-promoter
817	ENSG00000104738	MCM4	chr8	47970685	+	TRUE	3	KC-PB.4183.11	6.64015	18.0362	7.81502	20.4645	NA	NA	6.19262	6.94984	6.71081	6.70734	7.40623	7.95463	8.06769	7.86314	7.78338	17.9617	18.6976	17.8547	17.6306	20.085	20.7817	20.6968	20.5609	20.1982	1.17486	7.29286	5.98094	0.000279751	0.0111037	0.778796	UpReg	NonSwitched	Multi-promoter
818	ENSG00000104756	KCTD9	chr8	25458313	-	FALSE	1	KC-PB.4138.1,KC-PB.4138.2,KC-PB.4138.3	5.31171	5.31171	5.05352	5.05352	Major	Major	4.25061	6.16874	5.37374	5.45375	5.16174	4.67118	4.83029	5.45719	5.14718	4.25061	6.16874	5.37374	5.45375	5.16174	4.67118	4.83029	5.45719	5.14718	-0.258193	5.16827	-0.714757	0.494265	0.687715	-6.45641	NonSig	NonSwitched	Single-promoter
819	ENSG00000104765	BNIP3L	chr8	26383049	+	FALSE	1	KC-PB.4141.1,KC-PB.4141.2	6.8617	6.8617	6.20695	6.20695	Major	Major	6.79462	6.87708	6.35624	7.41885	6.4954	6.21789	6.10786	6.04998	6.16363	6.79462	6.87708	6.35624	7.41885	6.4954	6.21789	6.10786	6.04998	6.16363	-0.654745	6.49795	-3.06473	0.0147112	0.0906382	-3.27977	NonSig	NonSwitched	Single-promoter
820	ENSG00000104774	MAN2B1	chr19	12666727	-	FALSE	1	KC-PB.2212.1	5.38737	5.38737	4.95954	4.95954	Major	Major	5.68647	5.71933	5.44419	4.69946	4.88513	4.94638	5.48502	4.48966	4.9915	5.68647	5.71933	5.44419	4.69946	4.88513	4.94638	5.48502	4.48966	4.9915	-0.427829	5.14968	-1.59407	0.148022	0.346425	-5.50785	NonSig	NonSwitched	Single-promoter
821	ENSG00000104812	GYS1	chr19	48993309	-	FALSE	1	KC-PB.2297.1	4.70821	4.70821	5.33596	5.33596	Major	Major	5.8306	3.92487	5.26116	3.81619	5.45372	5.20758	5.42044	5.24494	5.35312	5.8306	3.92487	5.26116	3.81619	5.45372	5.20758	5.42044	5.24494	5.35312	0.627752	5.05696	1.51671	0.166262	0.370277	-5.61042	NonSig	NonSwitched	Single-promoter
822	ENSG00000104825	NFKBIB	chr19	38899991	+	FALSE	1	KC-PB.2260.1	4.35887	4.35887	3.82061	3.82061	Major	Major	4.89998	4.01806	3.95653	4.56091	3.84631	3.95734	4.45374	2.80951	4.03615	4.89998	4.01806	3.95653	4.56091	3.84631	3.95734	4.45374	2.80951	4.03615	-0.53826	4.05984	-1.54302	0.159844	0.361249	-5.57585	NonSig	NonSwitched	Single-promoter
823	ENSG00000104881	PPP1R13L	chr19	45405065	-	FALSE	1	KC-PB.2279.1,KC-PB.2279.2,KC-PB.2279.3	6.78202	6.78202	6.02267	6.02267	Major	Major	7.18272	6.82644	6.44481	6.67411	5.69644	6.06144	6.27546	5.95334	6.12668	7.18272	6.82644	6.44481	6.67411	5.69644	6.06144	6.27546	5.95334	6.12668	-0.759351	6.36016	-4.11507	0.0030749	0.0397501	-1.68209	NonSig	NonSwitched	Single-promoter
824	ENSG00000104884	ERCC2	chr19	45370558	-	FALSE	1	KC-PB.2278.1	0	0	2.65979	2.65979	Inactive	Major	0	0	0	0	3.02462	2.66779	2.29902	2.62101	2.68648	0	0	0	0	3.02462	2.66779	2.29902	2.62101	2.68648	2.65979	1.47766	17.6387	6.71886e-08	0.000238856	8.34166	UpReg	Switched	Single-promoter
825	ENSG00000104998	IL27RA	chr19	14031798	+	FALSE	1	KC-PB.2217.2,KC-PB.2217.1	0.252416	0.252416	0	0	Major	Inactive	0	1.00966	0	0	0	0	0	0	0	0	1.00966	0	0	0	0	0	0	0	-0.252416	0.112185	-1.13286	0.288768	0.513285	-6.07168	NonSig	NonSwitched	Single-promoter
826	ENSG00000105085	MED26	chr19	16628209	-	FALSE	1	KC-PB.2226.1	4.14738	4.14738	3.92941	3.92941	Major	Major	4.50096	3.82525	4.57441	3.6889	3.54925	4.27489	3.74602	3.96318	4.11372	4.50096	3.82525	4.57441	3.6889	3.54925	4.27489	3.74602	3.96318	4.11372	-0.217967	4.02629	-0.890897	0.39794	0.610634	-6.31174	NonSig	NonSwitched	Single-promoter
827	ENSG00000105127	AKAP8	chr19	15379763	-	FALSE	1	KC-PB.2221.1	2.13575	2.13575	3.34698	3.34698	Major	Major	1.48725	2.82388	2.04002	2.19185	4.30279	3.23485	3.34335	2.80951	3.04437	1.48725	2.82388	2.04002	2.19185	4.30279	3.23485	3.34335	2.80951	3.04437	1.21122	2.80865	3.38886	0.00894173	0.0701189	-2.77496	NonSig	NonSwitched	Single-promoter
828	ENSG00000105137	SYDE1	chr19	15107375	+	FALSE	1	KC-PB.2218.1	1.32768	1.32768	0.526787	0.526787	Major	Major	2.68046	1.00966	1.62059	0	0.920075	0.819616	0	0.894243	0	2.68046	1.00966	1.62059	0	0.920075	0.819616	0	0.894243	0	-0.800892	0.882739	-1.56352	0.155	0.3555	-5.54869	NonSig	NonSwitched	Single-promoter
829	ENSG00000105186	ANKRD27	chr19	32675180	-	FALSE	1	KC-PB.2253.1	3.87255	3.87255	3.09146	3.09146	Major	Major	3.56331	4.18812	4.04986	3.6889	2.19183	2.48275	3.03368	3.79489	3.95417	3.56331	4.18812	4.04986	3.6889	2.19183	2.48275	3.03368	3.79489	3.95417	-0.781081	3.43861	-1.99643	0.079482	0.241091	-4.93684	NonSig	NonSwitched	Single-promoter
830	ENSG00000105220	GPI	chr19	34365164	+	FALSE	1	KC-PB.2249.1	3.01529	3.01529	3.59975	3.59975	Major	Major	2.20385	2.82388	3.21724	3.81619	3.17471	3.80776	4.11591	3.1256	3.77476	2.20385	2.82388	3.21724	3.81619	3.17471	3.80776	4.11591	3.1256	3.77476	0.58446	3.33999	1.66719	0.132467	0.324772	-5.40846	NonSig	NonSwitched	Single-promoter
831	ENSG00000105221	AKT2	chr19	40285344	-	FALSE	1	KC-PB.2264.1	5.34067	5.34067	5.86294	5.86294	Major	Major	5.91926	5.10616	5.51136	4.82587	5.64593	6.011	5.90253	6.0121	5.74313	5.91926	5.10616	5.51136	4.82587	5.64593	6.011	5.90253	6.0121	5.74313	0.52227	5.63082	2.31092	0.048326	0.183939	-4.46034	NonSig	NonSwitched	Single-promoter
832	ENSG00000105229	PIAS4	chr19	4007736	+	FALSE	1	KC-PB.2179.1	3.63425	3.63425	2.97956	2.97956	Major	Major	4.89998	3.33927	2.36458	3.93316	3.75393	2.02139	3.67398	2.40413	3.04437	4.89998	3.33927	2.36458	3.93316	3.75393	2.02139	3.67398	2.40413	3.04437	-0.654689	3.27053	-1.16253	0.277184	0.500832	-6.03928	NonSig	NonSwitched	Single-promoter
833	ENSG00000105281	SLC1A5	chr19	46788594	-	FALSE	1	KC-PB.2287.1	5.32725	5.32725	5.95337	5.95337	Major	Major	4.81009	4.87658	5.88509	5.73726	5.74525	6.48756	6.16153	5.78382	5.58869	4.81009	4.87658	5.88509	5.73726	5.74525	6.48756	6.16153	5.78382	5.58869	0.626118	5.6751	2.10568	0.0669077	0.220476	-4.77351	NonSig	NonSwitched	Single-promoter
834	ENSG00000105323	HNRNPUL1	chr19	41262557	+	FALSE	1	KC-PB.2267.1	3.0983	13.1283	3.65682	15.7682	Minor	Minor	4.25061	3.33927	3.04658	1.75672	4.16608	4.02669	2.47892	3.49871	4.11372	15.3446	14.6233	13.6819	8.86324	16.2945	15.7225	14.2941	16.9808	15.5492	0.558527	3.40859	1.03875	0.328077	0.550407	-6.17032	NonSig	NonSwitched	Multi-promoter
835	ENSG00000105323	HNRNPUL1	chr19	41264374	+	FALSE	2	KC-PB.2267.2,KC-PB.2267.3,KC-PB.2267.4	7.26976	13.1283	7.30978	15.7682	Major	Major	7.14645	7.25754	7.56853	7.10652	7.48738	7.15495	7.42269	7.17385	7.31002	15.3446	14.6233	13.6819	8.86324	16.2945	15.7225	14.2941	16.9808	15.5492	0.040017	7.29199	0.281728	0.785012	0.896627	-6.68644	NonSig	NonSwitched	Multi-promoter
836	ENSG00000105323	HNRNPUL1	chr19	41265019	+	FALSE	3	KC-PB.2267.6,KC-PB.2267.7	0.509117	13.1283	2.60458	15.7682	Minor	Minor	0	1.00966	1.0268	0	2.44918	2.27043	2.29902	2.80951	3.19474	15.3446	14.6233	13.6819	8.86324	16.2945	15.7225	14.2941	16.9808	15.5492	2.09546	1.67326	6.70287	0.000125398	0.00731329	1.59294	UpReg	NonSwitched	Multi-promoter
837	ENSG00000105323	HNRNPUL1	chr19	41265122	+	FALSE	4	KC-PB.2267.8	2.2511	13.1283	2.19703	15.7682	Minor	Minor	3.94751	3.01687	2.04002	0	2.19183	2.27043	2.09346	3.49871	0.930726	15.3446	14.6233	13.6819	8.86324	16.2945	15.7225	14.2941	16.9808	15.5492	-0.0540654	2.22106	-0.067084	0.948094	0.98986	-6.72756	NonSig	NonSwitched	Multi-promoter
838	ENSG00000105325	FZR1	chr19	3506311	+	FALSE	1	KC-PB.2177.1	4.59726	4.59726	4.70228	4.70228	Major	Major	4.50096	4.1056	5.22159	4.56091	4.54259	5.1774	4.49613	4.78752	4.50777	4.50096	4.1056	5.22159	4.56091	4.54259	5.1774	4.49613	4.78752	4.50777	0.105019	4.65561	0.424123	0.682198	0.835492	-6.63181	NonSig	NonSwitched	Single-promoter
839	ENSG00000105355	PLIN3	chr19	4867665	-	FALSE	1	KC-PB.2184.1,KC-PB.2184.2	6.78845	6.78845	7.52071	7.52071	Major	Major	7.50266	6.63377	6.13981	6.87756	7.68171	7.36367	7.48717	7.41793	7.65305	7.50266	6.63377	6.13981	6.87756	7.68171	7.36367	7.48717	7.41793	7.65305	0.732253	7.19526	2.88033	0.0196194	0.109493	-3.56942	NonSig	NonSwitched	Single-promoter
840	ENSG00000105486	LIG1	chr19	48170338	-	FALSE	1	KC-PB.2292.1	5.54331	5.54331	4.74532	4.74532	Major	Major	5.73613	5.47826	5.22159	5.73726	6.56503	6.02801	5.2073	0	5.92627	5.73613	5.47826	5.22159	5.73726	6.56503	6.02801	5.2073	0	5.92627	-0.79799	5.09998	-0.633569	0.543331	0.72971	-6.51367	NonSig	NonSwitched	Single-promoter
841	ENSG00000105514	RAB3D	chr19	11339658	-	FALSE	1	KC-PB.2210.1,KC-PB.2210.2,KC-PB.2210.3	7.7994	7.7994	7.40521	7.40521	Major	Major	8.5201	7.51101	7.40153	7.76497	7.2711	7.64302	7.58372	7.1303	7.39792	8.5201	7.51101	7.40153	7.76497	7.2711	7.64302	7.58372	7.1303	7.39792	-0.394191	7.58041	-1.61839	0.142672	0.338133	-5.47504	NonSig	NonSwitched	Single-promoter
842	ENSG00000105556	MIER2	chr19	344803	-	FALSE	1	KC-PB.2162.1	1.32768	1.32768	1.41603	1.41603	Major	Major	2.68046	1.00966	1.62059	0	1.47738	2.66779	0.725559	0	2.20943	2.68046	1.00966	1.62059	0	1.47738	2.66779	0.725559	0	2.20943	0.0883543	1.37676	0.129615	0.899941	0.961903	-6.72078	NonSig	NonSwitched	Single-promoter
843	ENSG00000105576	TNPO2	chr19	12723982	-	FALSE	1	KC-PB.2213.2,KC-PB.2213.1	2.47194	2.47194	3.96101	3.96101	Major	Major	0	4.18812	3.5078	2.19185	3.84631	4.09286	3.81464	4.59593	3.45531	0	4.18812	3.5078	2.19185	3.84631	4.09286	3.81464	4.59593	3.45531	1.48906	3.2992	1.92702	0.0886238	0.25761	-5.03908	NonSig	NonSwitched	Single-promoter
844	ENSG00000105612	DNASE2	chr19	12881449	-	FALSE	1	KC-PB.2219.1	5.14349	5.14349	4.67818	4.67818	Major	Major	5.87561	5.41112	4.13751	5.14973	4.64903	4.43651	4.79676	4.78752	4.72108	5.87561	5.41112	4.13751	5.14973	4.64903	4.43651	4.79676	4.78752	4.72108	-0.465313	4.88499	-1.46816	0.178712	0.386116	-5.67334	NonSig	NonSwitched	Single-promoter
845	ENSG00000105656	ELL	chr19	18522092	-	FALSE	1	KC-PB.2231.1,KC-PB.2231.2	4.3348	4.3348	4.95529	4.95529	Major	Major	3.76816	4.97284	4.9093	3.6889	5.08797	4.98174	4.72727	5.30883	4.67063	3.76816	4.97284	4.9093	3.6889	5.08797	4.98174	4.72727	5.30883	4.67063	0.62049	4.67952	1.93457	0.0875823	0.255916	-5.02802	NonSig	NonSwitched	Single-promoter
846	ENSG00000105726	ATP13A1	chr19	19663673	-	FALSE	1	KC-PB.2235.1	4.79006	4.79006	5.01467	5.01467	Major	Major	5.21221	4.47782	4.9093	4.56091	4.69944	5.04995	5.35283	4.78752	5.18361	5.21221	4.47782	4.9093	4.56091	4.69944	5.04995	5.35283	4.78752	5.18361	0.224611	4.91484	1.08574	0.307956	0.532062	-6.12187	NonSig	NonSwitched	Single-promoter
847	ENSG00000105732	ZNF574	chr19	42076166	+	FALSE	1	KC-PB.2271.1	3.82329	3.82329	3.99552	3.99552	Major	Major	4.38121	3.47695	4.9093	2.52571	4.01504	3.72672	4.31851	3.96318	3.95417	4.38121	3.47695	4.9093	2.52571	4.01504	3.72672	4.31851	3.96318	3.95417	0.172232	3.91898	0.389292	0.706806	0.851184	-6.64714	NonSig	NonSwitched	Single-promoter
848	ENSG00000105793	GTPBP10	chr7	90346702	+	FALSE	1	KC-PB.3986.1	3.36199	3.36199	3.98192	3.98192	Major	Major	2.20385	3.33927	4.51018	3.39467	3.43488	3.72672	4.11591	4.59593	4.03615	2.20385	3.33927	4.51018	3.39467	3.43488	3.72672	4.11591	4.59593	4.03615	0.619925	3.7064	1.41106	0.194398	0.406999	-5.74579	NonSig	NonSwitched	Single-promoter
849	ENSG00000105810	CDK6	chr7	92836576	-	FALSE	1	KC-PB.3994.3,KC-PB.3994.4,KC-PB.3994.5	6.1821	6.1821	5.57361	5.57361	Major	Major	6.08174	6.5109	6.00647	6.12926	5.56667	5.40281	5.99413	5.42872	5.47571	6.08174	6.5109	6.00647	6.12926	5.56667	5.40281	5.99413	5.42872	5.47571	-0.608489	5.84405	-3.55084	0.00700432	0.0605848	-2.52594	NonSig	NonSwitched	Single-promoter
850	ENSG00000105835	NAMPT	chr7	106284570	-	FALSE	2	KC-PB.4026.2	0.256701	8.08346	1.46196	10.2568	Minor	Minor	0	0	1.0268	0	0	2.02139	2.47892	2.80951	0	7.823	7.88336	9.25965	7.36781	8.57058	10.7571	10.8919	11.7946	9.26969	1.20526	0.926291	1.79254	0.109257	0.291816	-5.23315	NonSig	NonSwitched	Multi-promoter
851	ENSG00000105835	NAMPT	chr7	106285155	-	FALSE	1	KC-PB.4026.1,KC-PB.4026.3	7.82676	8.08346	8.79481	10.2568	Major	Major	7.823	7.88336	8.23285	7.36781	8.57058	8.73574	8.41296	8.98509	9.26969	7.823	7.88336	9.25965	7.36781	8.57058	10.7571	10.8919	11.7946	9.26969	0.968056	8.36456	4.17685	0.00281758	0.0379412	-1.59224	NonSig	NonSwitched	Multi-promoter
852	ENSG00000105849	POLR1F	chr7	19709044	-	FALSE	1	KC-PB.3914.1,KC-PB.3914.2	4.08538	4.08538	4.52382	4.52382	Major	Major	3.94751	2.82388	4.80607	4.76405	4.01504	4.8348	5.39825	4.1837	4.18733	3.94751	2.82388	4.80607	4.76405	4.01504	4.8348	5.39825	4.1837	4.18733	0.438445	4.32896	0.933	0.377023	0.589899	-6.27324	NonSig	NonSwitched	Single-promoter
853	ENSG00000105879	CBLL1	chr7	107744146	+	FALSE	1	KC-PB.4030.1	5.01257	5.01257	5.33768	5.33768	Major	Major	4.61153	4.66235	5.13905	5.63736	5.42405	5.45406	5.48502	5.17808	5.14718	4.61153	4.66235	5.13905	5.63736	5.42405	5.45406	5.48502	5.17808	5.14718	0.325107	5.19319	1.43609	0.187381	0.398886	-5.71425	NonSig	NonSwitched	Single-promoter
854	ENSG00000105887	MTPN	chr7	135977358	-	FALSE	1	KC-PB.4074.1	7.9599	7.9599	7.9436	7.9436	Major	Major	7.99604	7.72653	7.87307	8.24398	7.84736	7.92769	8.05711	7.8034	8.08246	7.99604	7.72653	7.87307	8.24398	7.84736	7.92769	8.05711	7.8034	8.08246	-0.016299	7.95085	-0.11674	0.909826	0.966735	-6.72253	NonSig	NonSwitched	Single-promoter
855	ENSG00000105939	ZC3HAV1	chr7	139109788	-	FALSE	1	KC-PB.4079.1,KC-PB.4079.2,KC-PB.4079.4	5.4742	5.4742	5.70269	5.70269	Major	Major	5.06452	6.04133	5.33718	5.45375	5.98766	5.34967	5.71781	5.69096	5.76733	5.06452	6.04133	5.33718	5.45375	5.98766	5.34967	5.71781	5.69096	5.76733	0.22849	5.60114	1.05181	0.322386	0.545754	-6.15702	NonSig	NonSwitched	Single-promoter
856	ENSG00000105953	OGDH	chr7	44606592	+	FALSE	1	KC-PB.3958.1,KC-PB.3958.2,KC-PB.3958.3	2.85489	2.85489	3.86008	3.86008	Major	Major	3.76816	3.71823	0	3.93316	4.16608	4.27489	2.7828	4.04049	4.03615	3.76816	3.71823	0	3.93316	4.16608	4.27489	2.7828	4.04049	4.03615	1.0052	3.41333	1.22252	0.254909	0.476948	-5.97195	NonSig	NonSwitched	Single-promoter
857	ENSG00000105971	CAV2	chr7	116499686	+	FALSE	1	KC-PB.4041.1,KC-PB.4041.2,KC-PB.4041.3,KC-PB.4041.4,KC-PB.4041.5	7.20077	15.3294	7.52431	15.9179	Minor	Minor	6.92881	7.16887	7.06394	7.64147	7.51579	7.35695	7.74183	7.60135	7.40565	15.1937	15.1538	15.2149	15.7552	16.0762	15.8931	16.0897	16.0474	15.4833	0.32354	7.38052	1.89695	0.0928882	0.263542	-5.08295	NonSig	NonSwitched	Multi-promoter
858	ENSG00000105971	CAV2	chr7	116500196	+	TRUE	2	KC-PB.4041.6	8.12864	15.3294	8.39362	15.9179	NA	NA	8.26492	7.98497	8.15096	8.11372	8.56039	8.53617	8.34789	8.44604	8.07763	15.1937	15.1538	15.2149	15.7552	16.0762	15.8931	16.0897	16.0474	15.4833	0.264979	8.27585	1.93182	0.0879599	0.25652	-5.03205	NonSig	NonSwitched	Multi-promoter
859	ENSG00000105974	CAV1	chr7	116524767	+	FALSE	1	KC-PB.4043.1,KC-PB.4043.2,KC-PB.4043.3,KC-PB.4043.4	7.08228	15.8928	7.02153	15.7371	Minor	Minor	6.32833	7.24795	7.47067	7.28219	6.97625	7.17036	6.73976	7.1824	7.0389	14.7832	16.3626	16.7086	15.7168	15.6855	15.7418	15.5577	16.0451	15.6554	-0.060751	7.04853	-0.252611	0.806679	0.910395	-6.69495	NonSig	NonSwitched	Multi-promoter
860	ENSG00000105974	CAV1	chr7	116526362	+	TRUE	2	KC-PB.4043.6,KC-PB.4043.7,KC-PB.4043.5	8.8105	15.8928	8.71556	15.7371	NA	NA	8.45486	9.11462	9.2379	8.43461	8.70928	8.57141	8.81791	8.8627	8.61653	14.7832	16.3626	16.7086	15.7168	15.6855	15.7418	15.5577	16.0451	15.6554	-0.0949344	8.75776	-0.468394	0.651494	0.813223	-6.61051	NonSig	NonSwitched	Multi-promoter
861	ENSG00000105976	MET	chr7	116672404	+	FALSE	1	KC-PB.4045.1	3.38212	3.38212	3.43564	3.43564	Major	Major	3.94751	3.33927	4.04986	2.19185	2.85709	3.95734	3.51811	2.80951	4.03615	3.94751	3.33927	4.04986	2.19185	2.85709	3.95734	3.51811	2.80951	4.03615	0.0535167	3.41185	0.119709	0.907545	0.966254	-6.72214	NonSig	NonSwitched	Single-promoter
862	ENSG00000105983	LMBR1	chr7	156893183	-	FALSE	1	KC-PB.4102.1,KC-PB.4102.2	4.20262	4.20262	4.00261	4.00261	Major	Major	3.76816	4.54199	3.04658	5.45375	3.93314	3.45209	4.79676	3.79489	4.03615	3.76816	4.54199	3.04658	5.45375	3.93314	3.45209	4.79676	3.79489	4.03615	-0.200014	4.0915	-0.413247	0.68984	0.840144	-6.63673	NonSig	NonSwitched	Single-promoter
863	ENSG00000105993	DNAJB6	chr7	157337025	+	FALSE	1	KC-PB.4104.1	6.26318	6.26318	6.71136	6.71136	Major	Major	5.34617	6.6915	6.42753	6.58753	6.36092	6.79638	6.81705	6.5238	7.05864	5.34617	6.6915	6.42753	6.58753	6.36092	6.79638	6.81705	6.5238	7.05864	0.448176	6.51217	1.52124	0.165142	0.368537	-5.6045	NonSig	NonSwitched	Single-promoter
864	ENSG00000106009	BRAT1	chr7	2555509	-	FALSE	1	KC-PB.3897.1	3.33963	3.33963	3.4217	3.4217	Major	Major	2.68046	3.92487	3.95653	2.79664	3.93314	3.54956	3.14445	3.79489	2.68648	2.68046	3.92487	3.95653	2.79664	3.93314	3.54956	3.14445	3.79489	2.68648	0.082078	3.38522	0.217416	0.833106	0.924051	-6.70402	NonSig	NonSwitched	Single-promoter
865	ENSG00000106052	TAX1BP1	chr7	27740153	+	FALSE	1	KC-PB.3930.2,KC-PB.3930.3,KC-PB.3930.4	5.41443	5.41443	5.81441	5.81441	Major	Major	5.06452	6.30442	5.13905	5.14973	6.1231	5.34967	5.71781	5.89208	5.98937	5.06452	6.30442	5.13905	5.14973	6.1231	5.34967	5.71781	5.89208	5.98937	0.399976	5.63664	1.37304	0.205498	0.421792	-5.79306	NonSig	NonSwitched	Single-promoter
866	ENSG00000106080	FKBP14	chr7	30026701	-	FALSE	1	KC-PB.3938.1,KC-PB.3938.2,KC-PB.3938.3,KC-PB.3938.5	2.16118	2.16118	3.55826	3.55826	Major	Major	1.48725	2.60103	2.36458	2.19185	2.44918	4.3308	3.94279	3.49871	3.56983	1.48725	2.60103	2.36458	2.19185	2.44918	4.3308	3.94279	3.49871	3.56983	1.39709	2.93734	3.57995	0.00670588	0.0588627	-2.48146	NonSig	NonSwitched	Single-promoter
867	ENSG00000106244	PDAP1	chr7	99408597	-	FALSE	1	KC-PB.4003.1	6.28445	6.28445	7.01464	7.01464	Major	Major	6.53886	6.66293	5.93488	6.00115	6.7438	7.23771	6.85012	6.93154	7.31002	6.53886	6.66293	5.93488	6.00115	6.7438	7.23771	6.85012	6.93154	7.31002	0.730188	6.69011	3.49195	0.00765167	0.0632597	-2.61617	NonSig	NonSwitched	Single-promoter
868	ENSG00000106246	PTCD1	chr7	99438787	-	FALSE	1	KC-PB.4004.2	1.50838	1.50838	1.35938	1.35938	Major	Major	0	0	3.5078	2.52571	1.47738	0.819616	1.5659	1.44216	1.49184	0	0	3.5078	2.52571	1.47738	0.819616	1.5659	1.44216	1.49184	-0.148998	1.4256	-0.201791	0.844912	0.93014	-6.70762	NonSig	NonSwitched	Single-promoter
869	ENSG00000106261	ZKSCAN1	chr7	100015603	+	FALSE	1	KC-PB.4009.1	5.95562	5.95562	5.89511	5.89511	Major	Major	5.8306	6.16874	6.11843	5.70472	5.96723	5.50355	5.94905	6.33723	5.71851	5.8306	6.16874	6.11843	5.70472	5.96723	5.50355	5.94905	6.33723	5.71851	-0.0605073	5.92201	-0.312618	0.76224	0.882664	-6.67641	NonSig	NonSwitched	Single-promoter
870	ENSG00000106278	PTPRZ1	chr7	121873123	+	FALSE	1	KC-PB.4047.1,KC-PB.4047.2,KC-PB.4047.3	10.3662	10.3662	9.12533	9.12533	Major	Major	10.8431	10.331	10.4877	9.80289	8.99564	9.34525	8.93427	9.1468	9.2047	10.8431	10.331	10.4877	9.80289	8.99564	9.34525	8.93427	9.1468	9.2047	-1.24085	9.67682	-5.88179	0.000313929	0.0113723	0.661218	DownReg	NonSwitched	Single-promoter
871	ENSG00000106344	RBM28	chr7	128343908	-	FALSE	1	KC-PB.4053.1	3.72949	3.72949	4.13066	4.13066	Major	Major	3.32448	4.47782	2.62936	4.4863	3.17471	3.88449	4.86306	4.6949	4.03615	3.32448	4.47782	2.62936	4.4863	3.17471	3.88449	4.86306	4.6949	4.03615	0.401173	3.95236	0.814305	0.438086	0.644356	-6.37797	NonSig	NonSwitched	Single-promoter
872	ENSG00000106346	USP42	chr7	6104963	+	FALSE	1	KC-PB.3904.1	2.376	2.376	2.35344	2.35344	Major	Major	3.32448	1.00966	1.62059	3.54927	3.31065	1.7202	1.85366	1.83831	3.04437	3.32448	1.00966	1.62059	3.54927	3.31065	1.7202	1.85366	1.83831	3.04437	-0.0225621	2.36347	-0.0362624	0.971926	1	-6.72932	NonSig	NonSwitched	Single-promoter
873	ENSG00000106397	PLOD3	chr7	101217581	-	FALSE	1	KC-PB.4014.1	4.41502	4.41502	3.38274	3.38274	Major	Major	4.25061	3.71823	4.80607	4.88515	3.43488	4.09286	2.63885	3.70276	3.04437	4.25061	3.71823	4.80607	4.88515	3.43488	4.09286	2.63885	3.70276	3.04437	-1.03227	3.84153	-2.91867	0.018475	0.104848	-3.50912	NonSig	NonSwitched	Single-promoter
874	ENSG00000106443	PHF14	chr7	10973852	+	FALSE	1	KC-PB.3910.1	5.25435	5.25435	5.066	5.066	Major	Major	4.61153	5.54241	5.57555	5.28793	4.64903	5.34967	5.35283	5.0716	4.90687	4.61153	5.54241	5.57555	5.28793	4.64903	5.34967	5.35283	5.0716	4.90687	-0.188354	5.14971	-0.766936	0.46426	0.666736	-6.4164	NonSig	NonSwitched	Single-promoter
875	ENSG00000106460	TMEM106B	chr7	12211199	+	FALSE	1	KC-PB.3912.1,KC-PB.3912.2	7.22187	7.22187	5.99529	5.99529	Major	Major	7.31932	7.11715	6.89816	7.55285	5.96723	5.82884	6.3467	5.78382	6.04983	7.31932	7.11715	6.89816	7.55285	5.96723	5.82884	6.3467	5.78382	6.04983	-1.22658	6.54043	-6.87321	0.000104706	0.00664693	1.77469	DownReg	NonSwitched	Single-promoter
876	ENSG00000106477	CEP41	chr7	130441027	-	FALSE	1	KC-PB.4061.1,KC-PB.4061.2	0.786291	0.786291	1.81432	1.81432	Major	Major	0	2.01447	0	1.13069	1.47738	2.02139	2.63885	1.44216	1.49184	0	2.01447	0	1.13069	1.47738	2.02139	2.63885	1.44216	1.49184	1.02803	1.35742	2.18688	0.0588391	0.207765	-4.65048	NonSig	NonSwitched	Single-promoter
877	ENSG00000106603	COA1	chr7	43729530	-	FALSE	1	KC-PB.3951.1	2.18337	2.18337	2.96257	2.96257	Major	Major	0	3.71823	1.62059	3.39467	3.02462	4.09286	2.29902	1.44216	3.95417	0	3.71823	1.62059	3.39467	3.02462	4.09286	2.29902	1.44216	3.95417	0.779195	2.61626	0.894292	0.396223	0.608717	-6.30869	NonSig	NonSwitched	Single-promoter
878	ENSG00000106608	URGCP	chr7	43906624	-	FALSE	2	KC-PB.3952.2	1.7965	3.55814	2.33266	4.3576	Major	Major	0	0	3.36982	3.81619	1.87839	2.48275	1.85366	2.40413	3.04437	2.68046	3.33927	4.39663	3.81619	2.79846	4.50414	4.33258	5.21364	4.93917	0.536158	2.09437	0.614138	0.555492	0.739901	-6.52645	NonSig	NonSwitched	Multi-promoter
879	ENSG00000106608	URGCP	chr7	43926384	-	FALSE	1	KC-PB.3952.1	1.76163	3.55814	2.02494	4.3576	Minor	Minor	2.68046	3.33927	1.0268	0	0.920075	2.02139	2.47892	2.80951	1.8948	2.68046	3.33927	4.39663	3.81619	2.79846	4.50414	4.33258	5.21364	4.93917	0.263303	1.90791	0.374006	0.717723	0.857649	-6.65347	NonSig	NonSwitched	Multi-promoter
880	ENSG00000106609	TMEM248	chr7	66921231	+	FALSE	1	KC-PB.3967.1	0	0	1.01182	1.01182	Inactive	Major	0	0	0	0	0.920075	2.48275	0.725559	0	0.930726	0	0	0	0	0.920075	2.48275	0.725559	0	0.930726	1.01182	0.562123	2.3492	0.0454742	0.17787	-4.4012	NonSig	NonSwitched	Single-promoter
881	ENSG00000106638	TBL2	chr7	73578579	-	FALSE	1	KC-PB.3973.1	3.35738	3.35738	3.89909	3.89909	Major	Major	4.50096	3.33927	2.04002	3.54927	4.16608	4.21673	3.34335	4.31397	3.45531	4.50096	3.33927	2.04002	3.54927	4.16608	4.21673	3.34335	4.31397	3.45531	0.541705	3.65833	1.15401	0.280471	0.504847	-6.04864	NonSig	NonSwitched	Single-promoter
882	ENSG00000106723	SPIN1	chr9	88388420	+	FALSE	1	KC-PB.4357.1,KC-PB.4357.2,KC-PB.4357.3	4.45089	4.45089	4.19294	4.19294	Major	Major	5.46874	2.60103	5.4094	4.3244	4.54259	4.58184	3.88013	3.70276	4.25737	5.46874	2.60103	5.4094	4.3244	4.54259	4.58184	3.88013	3.70276	4.25737	-0.257955	4.30758	-0.447422	0.665956	0.825191	-6.62085	NonSig	NonSwitched	Single-promoter
883	ENSG00000106785	TRIM14	chr9	98119218	-	FALSE	1	KC-PB.4376.1,KC-PB.4376.2	4.78609	4.78609	5.67229	5.67229	Major	Major	4.50096	5.44508	4.37244	4.82587	5.29885	6.011	6.1483	5.37002	5.53331	4.50096	5.44508	4.37244	4.82587	5.29885	6.011	6.1483	5.37002	5.53331	0.886208	5.27842	3.18496	0.0122144	0.0831841	-3.0917	NonSig	NonSwitched	Single-promoter
884	ENSG00000106789	CORO2A	chr9	98192639	-	FALSE	1	KC-PB.4377.1,KC-PB.4377.2,KC-PB.4377.3	2.64645	2.64645	2.7047	2.7047	Major	Major	3.56331	2.60103	1.0268	3.39467	2.44918	3.11259	2.29902	2.97619	2.68648	3.56331	2.60103	1.0268	3.39467	2.44918	3.11259	2.29902	2.97619	2.68648	0.0582431	2.67881	0.11629	0.910172	0.966735	-6.72259	NonSig	NonSwitched	Single-promoter
885	ENSG00000106799	TGFBR1	chr9	99105133	+	FALSE	1	KC-PB.4380.1,KC-PB.4380.2	2.00659	2.00659	2.73592	2.73592	Major	Major	2.20385	2.60103	0	3.22149	3.54925	2.02139	1.5659	3.49871	3.04437	2.20385	2.60103	0	3.22149	3.54925	2.02139	1.5659	3.49871	3.04437	0.729332	2.41178	1.03167	0.331193	0.551814	-6.17748	NonSig	NonSwitched	Single-promoter
886	ENSG00000106992	AK1	chr9	127877712	-	FALSE	1	KC-PB.4434.1	2.64011	2.64011	3.92735	3.92735	Major	Major	1.48725	2.01447	3.36982	3.6889	4.69944	3.72672	3.59815	3.49871	4.11372	1.48725	2.01447	3.36982	3.6889	4.69944	3.72672	3.59815	3.49871	4.11372	1.28724	3.35524	2.62133	0.0295203	0.139504	-3.97669	NonSig	NonSwitched	Single-promoter
887	ENSG00000107099	DOCK8	chr9	214858	+	FALSE	1	KC-PB.4280.1	0	0	1.72835	1.72835	Inactive	Major	0	0	0	0	0	2.66779	0	2.40413	3.56983	0	0	0	0	0	2.66779	0	2.40413	3.56983	1.72835	0.960195	2.25855	0.0525168	0.193445	-4.54091	NonSig	NonSwitched	Single-promoter
888	ENSG00000107164	FUBP3	chr9	130579604	+	FALSE	1	KC-PB.4447.1	4.05228	4.05228	4.58128	4.58128	Major	Major	3.56331	4.01806	4.22014	4.40762	4.74815	5.08288	4.45374	4.11387	4.50777	3.56331	4.01806	4.22014	4.40762	4.74815	5.08288	4.45374	4.11387	4.50777	0.529	4.34617	2.20189	0.0574555	0.205075	-4.6276	NonSig	NonSwitched	Single-promoter
889	ENSG00000107262	BAG1	chr9	33264683	-	FALSE	1	KC-PB.4314.1	7.82074	7.82074	7.30496	7.30496	Major	Major	7.63944	7.81359	7.63781	8.1921	7.50874	7.32977	7.63205	7.07625	6.97797	7.63944	7.81359	7.63781	8.1921	7.50874	7.32977	7.63205	7.07625	6.97797	-0.515781	7.53419	-2.71604	0.0254121	0.12869	-3.82789	NonSig	NonSwitched	Single-promoter
890	ENSG00000107372	ZFAND5	chr9	72365208	-	FALSE	1	KC-PB.4342.2,KC-PB.4342.1	5.33026	5.33026	5.38887	5.38887	Major	Major	4.38121	5.69131	5.54381	5.70472	5.29885	5.2945	5.12863	5.33975	5.88262	4.38121	5.69131	5.54381	5.70472	5.29885	5.2945	5.12863	5.33975	5.88262	0.0586078	5.36282	0.193353	0.851306	0.932822	-6.70945	NonSig	NonSwitched	Single-promoter
891	ENSG00000107443	CCNJ	chr10	96043507	+	FALSE	1	KC-PB.640.1	1.64204	1.64204	1.98638	1.98638	Major	Major	0	4.41067	1.0268	1.13069	1.87839	2.02139	2.29902	1.83831	1.8948	0	4.41067	1.0268	1.13069	1.87839	2.02139	2.29902	1.83831	1.8948	0.344341	1.83334	0.441168	0.670298	0.827399	-6.62385	NonSig	NonSwitched	Single-promoter
892	ENSG00000107485	GATA3	chr10	8054688	+	FALSE	1	KC-PB.506.1	7.7863	7.7863	7.34728	7.34728	Major	Major	7.95469	7.5814	7.1402	8.46892	7.18526	7.56357	7.25382	7.34362	7.39015	7.95469	7.5814	7.1402	8.46892	7.18526	7.56357	7.25382	7.34362	7.39015	-0.439021	7.5424	-1.73058	0.120211	0.307568	-5.32053	NonSig	NonSwitched	Single-promoter
893	ENSG00000107521	HPS1	chr10	98446925	-	FALSE	1	KC-PB.649.1,KC-PB.649.2	5.32478	5.32478	5.33492	5.33492	Major	Major	6.53886	5.41112	3.85674	5.49239	5.90415	5.2945	5.30593	4.91617	5.25382	6.53886	5.41112	3.85674	5.49239	5.90415	5.2945	5.30593	4.91617	5.25382	0.0101391	5.33041	0.0209855	0.98375	1	-6.7298	NonSig	NonSwitched	Single-promoter
894	ENSG00000107554	DNMBP	chr10	100009951	-	FALSE	1	KC-PB.653.1	3.32111	3.32111	3.11402	3.11402	Major	Major	3.32448	1.59783	4.22014	4.142	4.09253	2.66779	2.63885	2.97619	3.19474	3.32448	1.59783	4.22014	4.142	4.09253	2.66779	2.63885	2.97619	3.19474	-0.207093	3.20606	-0.363617	0.725183	0.861366	-6.65763	NonSig	NonSwitched	Single-promoter
895	ENSG00000107566	ERLIN1	chr10	100186030	-	FALSE	1	KC-PB.654.1	2.89732	2.89732	2.45098	2.45098	Major	Major	2.68046	2.01447	2.853	4.04136	3.02462	3.11259	2.7828	2.40413	0.930726	2.68046	2.01447	2.853	4.04136	3.02462	3.11259	2.7828	2.40413	0.930726	-0.446348	2.64935	-0.820854	0.434548	0.641536	-6.37251	NonSig	NonSwitched	Single-promoter
896	ENSG00000107581	EIF3A	chr10	119080834	-	FALSE	1	KC-PB.699.1,KC-PB.699.2,KC-PB.699.9,KC-PB.699.10,KC-PB.699.11,KC-PB.699.12,KC-PB.699.13,KC-PB.699.14,KC-PB.699.15	7.05635	7.05635	7.64598	7.64598	Major	Major	6.9915	7.96755	6.91065	6.35571	7.49454	7.62636	7.65562	7.67593	7.77744	6.9915	7.96755	6.91065	6.35571	7.49454	7.62636	7.65562	7.67593	7.77744	0.589624	7.38392	2.04327	0.073833	0.233312	-4.86715	NonSig	NonSwitched	Single-promoter
897	ENSG00000107643	MAPK8	chr10	48306679	+	FALSE	1	KC-PB.563.1	2.77349	2.77349	3.64557	3.64557	Major	Major	3.56331	3.71823	1.62059	2.19185	3.54925	2.66779	3.94279	4.11387	3.95417	3.56331	3.71823	1.62059	2.19185	3.54925	2.66779	3.94279	4.11387	3.95417	0.872079	3.25798	1.73084	0.120163	0.307568	-5.32017	NonSig	NonSwitched	Single-promoter
898	ENSG00000107651	SEC23IP	chr10	119892703	+	FALSE	1	KC-PB.701.1,KC-PB.701.2,KC-PB.701.3,KC-PB.701.4,KC-PB.701.5	4.57567	4.57567	5.06002	5.06002	Major	Major	3.76816	4.71896	5.05149	4.76405	4.69944	5.50355	5.2326	5.14345	4.72108	3.76816	4.71896	5.05149	4.76405	4.69944	5.50355	5.2326	5.14345	4.72108	0.484357	4.84475	1.66524	0.132862	0.325292	-5.41114	NonSig	NonSwitched	Single-promoter
899	ENSG00000107669	ATE1	chr10	121928025	-	FALSE	2	KC-PB.705.1,KC-PB.705.3	4.11213	4.80372	4.19902	5.67125	Major	Major	3.56331	3.18706	5.37374	4.3244	4.8409	4.09286	3.59815	4.59593	3.86726	3.56331	4.19672	5.37374	6.08111	5.76097	5.43192	4.80422	7.00006	5.35909	0.0868924	4.1604	0.187061	0.856081	0.934958	-6.71077	NonSig	NonSwitched	Multi-promoter
900	ENSG00000107669	ATE1	chr10	121928483	-	FALSE	1	KC-PB.705.2	0.691595	4.80372	1.47224	5.67125	Minor	Minor	0	1.00966	0	1.75672	0.920075	1.33906	1.20607	2.40413	1.49184	3.56331	4.19672	5.37374	6.08111	5.76097	5.43192	4.80422	7.00006	5.35909	0.780642	1.12528	1.76923	0.113264	0.298172	-5.26618	NonSig	NonSwitched	Multi-promoter
901	ENSG00000107679	PLEKHA1	chr10	122374694	+	FALSE	1	KC-PB.707.2,KC-PB.707.3,KC-PB.707.6,KC-PB.707.4,KC-PB.707.5,KC-PB.707.8,KC-PB.707.9	3.92031	3.92031	4.37634	4.37634	Major	Major	3.76816	3.60263	3.74954	4.56091	3.54925	3.80776	4.83029	4.78752	4.90687	3.76816	3.60263	3.74954	4.56091	3.54925	3.80776	4.83029	4.78752	4.90687	0.456028	4.17366	1.27201	0.237667	0.461445	-5.91465	NonSig	NonSwitched	Single-promoter
902	ENSG00000107771	CCSER2	chr10	84328600	+	FALSE	1	KC-PB.616.1	4.30808	4.30808	3.68316	3.68316	Major	Major	3.94751	3.82525	4.57441	4.88515	3.17471	3.64086	3.67398	4.2503	3.67594	3.94751	3.82525	4.57441	4.88515	3.17471	3.64086	3.67398	4.2503	3.67594	-0.624921	3.9609	-2.19348	0.0582264	0.206997	-4.64042	NonSig	NonSwitched	Single-promoter
903	ENSG00000107854	TNKS2	chr10	91798409	+	FALSE	1	KC-PB.629.1	4.65273	4.65273	4.60509	4.60509	Major	Major	5.14026	4.47782	3.74954	5.24332	4.36658	4.3308	4.69123	4.48966	5.14718	5.14026	4.47782	3.74954	5.24332	4.36658	4.3308	4.69123	4.48966	5.14718	-0.0476425	4.62627	-0.143802	0.889069	0.955165	-6.71864	NonSig	NonSwitched	Single-promoter
904	ENSG00000107862	GBF1	chr10	102245532	+	FALSE	1	KC-PB.666.1	5.07212	5.07212	5.01243	5.01243	Major	Major	5.34617	5.06307	4.63591	5.24332	5.01022	5.11508	5.37572	4.48966	5.07144	5.34617	5.06307	4.63591	5.24332	5.01022	5.11508	5.37572	4.48966	5.07144	-0.0596928	5.03896	-0.275569	0.78958	0.899377	-6.68831	NonSig	NonSwitched	Single-promoter
905	ENSG00000107882	SUFU	chr10	102504003	+	FALSE	1	KC-PB.669.1	6.52156	6.52156	4.82644	4.82644	Major	Major	6.6724	6.58891	6.20213	6.62279	4.79527	4.53501	5.62533	4.31397	4.86261	6.6724	6.58891	6.20213	6.62279	4.79527	4.53501	5.62533	4.31397	4.86261	-1.69512	5.57982	-6.44285	0.000166209	0.00837317	1.30802	DownReg	NonSwitched	Single-promoter
906	ENSG00000107937	GTPBP4	chr10	988435	+	FALSE	1	KC-PB.492.1,KC-PB.492.2	3.89697	3.89697	5.54833	5.54833	Major	Major	4.25061	4.97284	2.04002	4.3244	5.61999	5.72835	5.56686	5.10797	5.71851	4.25061	4.97284	2.04002	4.3244	5.61999	5.72835	5.56686	5.10797	5.71851	1.65137	4.81439	3.08028	0.0143603	0.0903558	-3.2554	NonSig	NonSwitched	Single-promoter
907	ENSG00000107938	EDRF1	chr10	125719709	+	FALSE	1	KC-PB.714.1	4.45022	4.45022	3.63298	3.63298	Major	Major	3.32448	5.18865	3.95653	5.33121	3.84631	3.88449	4.16929	2.80951	3.45531	3.32448	5.18865	3.95653	5.33121	3.84631	3.88449	4.16929	2.80951	3.45531	-0.817237	3.9962	-1.73926	0.118617	0.304977	-5.30837	NonSig	NonSwitched	Single-promoter
908	ENSG00000107959	PITRM1	chr10	3172782	-	FALSE	1	KC-PB.496.1	3.40798	3.40798	4.01988	4.01988	Major	Major	4.107	3.82525	3.5078	2.19185	3.84631	4.67118	3.94279	3.96318	3.67594	4.107	3.82525	3.5078	2.19185	3.84631	4.67118	3.94279	3.96318	3.67594	0.611902	3.74792	1.55021	0.158131	0.359555	-5.56635	NonSig	NonSwitched	Single-promoter
909	ENSG00000107984	DKK1	chr10	52314281	+	FALSE	1	KC-PB.569.2,KC-PB.569.1	1.64583	1.64583	0	0	Major	Inactive	2.20385	1.00966	3.36982	0	0	0	0	0	0	2.20385	1.00966	3.36982	0	0	0	0	0	0	-1.64583	0.731482	-2.76878	0.0233824	0.122462	-3.74493	NonSig	NonSwitched	Single-promoter
910	ENSG00000108055	SMC3	chr10	110567704	+	FALSE	1	KC-PB.684.1,KC-PB.684.2	4.23928	4.23928	3.8573	3.8573	Major	Major	4.50096	4.77344	3.74954	3.93316	3.17471	4.09286	4.06048	4.1837	3.77476	4.50096	4.77344	3.74954	3.93316	3.17471	4.09286	4.06048	4.1837	3.77476	-0.381973	4.02707	-1.33444	0.217319	0.436726	-5.84022	NonSig	NonSwitched	Single-promoter
911	ENSG00000108061	SHOC2	chr10	110919605	+	FALSE	1	KC-PB.686.1	3.40156	3.40156	4.7325	4.7325	Major	Major	4.50096	4.66235	4.44295	0	5.12533	4.27489	4.86306	5.21189	4.18733	4.50096	4.66235	4.44295	0	5.12533	4.27489	4.86306	5.21189	4.18733	1.33094	4.14097	1.41031	0.194611	0.407206	-5.74673	NonSig	NonSwitched	Single-promoter
912	ENSG00000108064	TFAM	chr10	58385425	+	FALSE	1	KC-PB.571.1	4.30997	4.30997	5.42739	5.42739	Major	Major	5.40876	5.69131	6.13981	0	5.86051	4.8348	5.93371	5.73814	4.76981	5.40876	5.69131	6.13981	0	5.86051	4.8348	5.93371	5.73814	4.76981	1.11742	4.93076	0.93446	0.376312	0.589626	-6.27188	NonSig	NonSwitched	Single-promoter
913	ENSG00000108091	CCDC6	chr10	59907033	-	FALSE	1	KC-PB.579.1,KC-PB.579.2	7.299	7.299	7.54123	7.54123	Major	Major	7.0118	7.71265	7.05271	7.41885	7.8077	7.15495	7.37804	7.70591	7.65953	7.0118	7.71265	7.05271	7.41885	7.8077	7.15495	7.37804	7.70591	7.65953	0.242221	7.43357	1.18664	0.268047	0.49195	-6.0125	NonSig	NonSwitched	Single-promoter
914	ENSG00000108094	CUL2	chr10	35090349	-	FALSE	2	KC-PB.546.1,KC-PB.546.2	6.13535	10.525	5.12217	10.1546	Major	Major	6.08174	6.4453	5.88509	6.12926	4.92804	5.47902	4.98716	5.39967	4.81696	11.294	10.2706	11.1848	9.35075	10.16	10.3892	10.1945	10.3956	9.63392	-1.01318	5.57247	-5.32587	0.00061375	0.0153654	-0.0249935	DownReg	NonSwitched	Multi-promoter
915	ENSG00000108094	CUL2	chr10	35090584	-	FALSE	1	KC-PB.546.3	4.38965	10.525	5.03246	10.1546	Minor	Minor	5.21221	3.82525	5.29967	3.22149	5.23192	4.91014	5.2073	4.99598	4.81696	11.294	10.2706	11.1848	9.35075	10.16	10.3892	10.1945	10.3956	9.63392	0.642805	4.74677	1.48455	0.17442	0.380407	-5.65223	NonSig	NonSwitched	Multi-promoter
916	ENSG00000108219	TSPAN14	chr10	80454302	+	FALSE	1	KC-PB.612.1	4.61281	4.61281	4.50641	4.50641	Major	Major	4.9846	3.71823	4.75155	4.99687	4.74815	4.38463	4.36501	4.64626	4.38799	4.9846	3.71823	4.75155	4.99687	4.74815	4.38463	4.36501	4.64626	4.38799	-0.106402	4.5537	-0.388901	0.707084	0.851231	-6.6473	NonSig	NonSwitched	Single-promoter
917	ENSG00000108312	UBTF	chr17	44219502	-	FALSE	2	KC-PB.1970.1,KC-PB.1970.3	2.17615	8.02606	2.33132	7.92431	Minor	Minor	2.20385	2.01447	0	4.4863	2.6675	1.33906	3.03368	2.14878	2.46759	7.73018	8.01071	6.13981	10.2236	8.61401	6.66142	8.65901	7.5775	8.10961	0.155169	2.26236	0.193728	0.851021	0.932822	-6.70937	NonSig	NonSwitched	Multi-promoter
918	ENSG00000108312	UBTF	chr17	44220940	-	FALSE	1	KC-PB.1970.2	5.84991	8.02606	5.59299	7.92431	Major	Major	5.52633	5.99624	6.13981	5.73726	5.94651	5.32235	5.62533	5.42872	5.64203	7.73018	8.01071	6.13981	10.2236	8.61401	6.66142	8.65901	7.5775	8.10961	-0.256923	5.70718	-1.41936	0.192046	0.403502	-5.73537	NonSig	NonSwitched	Multi-promoter
919	ENSG00000108349	CASC3	chr17	40140318	+	FALSE	1	KC-PB.1942.1,KC-PB.1942.2	6.23358	6.23358	5.85916	5.85916	Major	Major	5.91926	6.26694	6.47878	6.26935	5.67141	5.70738	5.93371	5.95334	6.02995	5.91926	6.26694	6.47878	6.26935	5.67141	5.70738	5.93371	5.95334	6.02995	-0.374424	6.02557	-2.48995	0.0363612	0.155269	-4.18238	NonSig	NonSwitched	Single-promoter
920	ENSG00000108395	TRIM37	chr17	59106751	-	FALSE	1	KC-PB.2004.1	4.2813	4.2813	4.33408	4.33408	Major	Major	3.32448	4.47782	5.18091	4.142	3.84631	5.01625	4.86306	4.37494	3.56983	3.32448	4.47782	5.18091	4.142	3.84631	5.01625	4.86306	4.37494	3.56983	0.0527764	4.31062	0.121352	0.906283	0.96572	-6.72192	NonSig	NonSwitched	Single-promoter
921	ENSG00000108424	KPNB1	chr17	47649862	+	FALSE	1	KC-PB.1979.1,KC-PB.1979.2,KC-PB.1979.3,KC-PB.1979.4,KC-PB.1979.6,KC-PB.1979.7	7.46181	29.0478	7.31677	31.1878	Minor	Minor	7.58628	7.74709	7.07509	7.43877	7.39863	7.08352	7.46065	7.1824	7.45864	28.0337	29.5036	28.9324	29.7214	30.0432	30.5046	33.382	31.4021	30.6071	-0.145039	7.38123	-0.863587	0.411945	0.621056	-6.33593	NonSig	NonSwitched	Multi-promoter
922	ENSG00000108424	KPNB1	chr17	47650750	+	FALSE	2	KC-PB.1979.9,KC-PB.1979.10	0.282673	29.0478	0.980124	31.1878	Minor	Minor	0	0	0	1.13069	0	0.819616	2.63885	1.44216	0	28.0337	29.5036	28.9324	29.7214	30.0432	30.5046	33.382	31.4021	30.6071	0.697451	0.670146	1.22347	0.254569	0.476562	-5.97086	NonSig	NonSwitched	Multi-promoter
923	ENSG00000108424	KPNB1	chr17	47668315	+	TRUE	3	KC-PB.1979.11	7.15453	29.0478	7.8073	31.1878	NA	NA	7.25264	7.14841	7.16127	7.05582	7.79036	7.77986	7.88033	7.69399	7.89195	28.0337	29.5036	28.9324	29.7214	30.0432	30.5046	33.382	31.4021	30.6071	0.652764	7.51718	6.25463	0.000204838	0.00933588	1.096	NonSig	NonSwitched	Multi-promoter
924	ENSG00000108424	KPNB1	chr17	47673015	+	TRUE	4	KC-PB.1979.12	7.95988	29.0478	8.41791	31.1878	NA	NA	7.6131	8.34113	8.05854	7.82675	8.26223	8.32183	8.47257	8.48113	8.5518	28.0337	29.5036	28.9324	29.7214	30.0432	30.5046	33.382	31.4021	30.6071	0.458032	8.21434	2.76857	0.0233902	0.122462	-3.74526	NonSig	NonSwitched	Multi-promoter
925	ENSG00000108424	KPNB1	chr17	47674706	+	TRUE	5	KC-PB.1979.13	6.18888	29.0478	6.66571	31.1878	NA	NA	5.58171	6.26694	6.63754	6.26935	6.59196	6.49981	6.92962	6.6024	6.70474	28.0337	29.5036	28.9324	29.7214	30.0432	30.5046	33.382	31.4021	30.6071	0.476821	6.45378	2.23144	0.0548251	0.199288	-4.58246	NonSig	NonSwitched	Multi-promoter
926	ENSG00000108433	GOSR2	chr17	46923141	+	FALSE	1	KC-PB.1977.1	4.63145	4.63145	4.33268	4.33268	Major	Major	4.107	4.26618	4.9093	5.24332	4.59679	4.3308	3.88013	4.74195	4.11372	4.107	4.26618	4.9093	5.24332	4.59679	4.3308	3.88013	4.74195	4.11372	-0.298771	4.46547	-1.04839	0.323871	0.54688	-6.16052	NonSig	NonSwitched	Single-promoter
927	ENSG00000108443	RPS6KB1	chr17	59893121	+	FALSE	1	KC-PB.2013.1	5.68557	5.68557	4.6629	4.6629	Major	Major	5.91926	5.63358	5.29967	5.88977	4.74815	5.20758	4.53732	4.43344	4.38799	5.91926	5.63358	5.29967	5.88977	4.74815	5.20758	4.53732	4.43344	4.38799	-1.02267	5.11742	-4.77127	0.00125044	0.0245597	-0.756378	DownReg	NonSwitched	Single-promoter
928	ENSG00000108465	CDK5RAP3	chr17	47971139	+	FALSE	1	KC-PB.1980.1	5.34868	5.34868	5.7661	5.7661	Major	Major	3.94751	5.54241	5.4094	6.49542	5.67141	5.32235	6.25091	5.61717	5.96864	3.94751	5.54241	5.4094	6.49542	5.67141	5.32235	6.25091	5.61717	5.96864	0.417412	5.58058	0.901077	0.392807	0.606089	-6.30256	NonSig	NonSwitched	Single-promoter
929	ENSG00000108469	RECQL5	chr17	75667189	-	FALSE	1	KC-PB.2047.1	0	0	0	0	Inactive	Inactive	0	0	0	0	0	0	0	0	0	0	0	0	0	0	0	0	0	0	0	0	0	1	1	-6.73005	NonSig	NonSwitched	Single-promoter
930	ENSG00000108509	CAMTA2	chr17	4987650	-	FALSE	1	KC-PB.1870.1	1.89319	1.89319	2.04093	2.04093	Major	Major	3.32448	0	1.0268	3.22149	2.44918	2.02139	2.09346	2.14878	1.49184	3.32448	0	1.0268	3.22149	2.44918	2.02139	2.09346	2.14878	1.49184	0.147739	1.97527	0.214638	0.835202	0.92515	-6.70468	NonSig	NonSwitched	Single-promoter
931	ENSG00000108582	CPD	chr17	30378952	+	FALSE	1	KC-PB.1922.1	5.7354	5.7354	5.51043	5.51043	Major	Major	5.91926	6.20882	6.18166	4.63185	5.64593	5.37649	5.62533	5.42872	5.47571	5.91926	6.20882	6.18166	4.63185	5.64593	5.37649	5.62533	5.42872	5.47571	-0.224964	5.61042	-0.704996	0.500012	0.69192	-6.46362	NonSig	NonSwitched	Single-promoter
932	ENSG00000108588	CCDC47	chr17	63773588	-	FALSE	1	KC-PB.2022.1,KC-PB.2022.2,KC-PB.2022.3	6.21214	6.21214	6.57644	6.57644	Major	Major	6.22776	6.2858	6.28124	6.05377	6.61841	6.74586	6.77463	6.44068	6.30262	6.22776	6.2858	6.28124	6.05377	6.61841	6.74586	6.77463	6.44068	6.30262	0.364295	6.41453	2.63362	0.0289508	0.138515	-3.95739	NonSig	NonSwitched	Single-promoter
933	ENSG00000108592	FTSJ3	chr17	63827089	-	FALSE	1	KC-PB.2023.1	1.45112	1.45112	3.48436	3.48436	Major	Major	3.03811	1.00966	0	1.75672	3.84631	2.97901	2.47892	4.2503	3.86726	3.03811	1.00966	0	1.75672	3.84631	2.97901	2.47892	4.2503	3.86726	2.03324	2.5807	3.2634	0.0108273	0.0762198	-2.96947	NonSig	NonSwitched	Single-promoter
934	ENSG00000108599	AKAP10	chr17	19977846	-	FALSE	1	KC-PB.1909.1	4.54791	4.54791	4.2816	4.2816	Major	Major	4.38121	4.34023	4.9093	4.56091	4.42767	3.54956	4.61633	4.2503	4.56413	4.38121	4.34023	4.9093	4.56091	4.42767	3.54956	4.61633	4.2503	4.56413	-0.266315	4.39996	-1.0896	0.306348	0.530463	-6.11782	NonSig	NonSwitched	Single-promoter
935	ENSG00000108654	DDX5	chr17	64506289	-	TRUE	2	KC-PB.2025.1,KC-PB.2025.2,KC-PB.2025.3,KC-PB.2025.4,KC-PB.2025.8,KC-PB.2025.6	9.50005	13.6934	9.60649	13.9265	NA	NA	9.23261	9.40294	9.53888	9.82576	9.45039	9.52377	10.0135	9.53026	9.51457	12.5571	13.1212	13.9818	15.1137	13.6165	13.7987	14.5908	13.4934	14.1329	0.106443	9.55918	0.614865	0.555034	0.739901	-6.52598	NonSig	NonSwitched	Multi-promoter
936	ENSG00000108654	DDX5	chr17	64506904	-	FALSE	1	KC-PB.2025.7	4.1934	13.6934	4.31998	13.9265	Minor	Minor	3.32448	3.71823	4.44295	5.28793	4.16608	4.27489	4.57737	3.96318	4.61836	12.5571	13.1212	13.9818	15.1137	13.6165	13.7987	14.5908	13.4934	14.1329	0.126578	4.26372	0.331404	0.748508	0.874949	-6.66981	NonSig	NonSwitched	Multi-promoter
937	ENSG00000108669	CYTH1	chr17	78736813	-	FALSE	2	KC-PB.2057.1	3.21888	7.81413	3.88737	7.50276	Minor	Major	0	3.92487	4.9093	4.04136	3.31065	4.09286	3.74602	3.96318	4.32416	5.06452	8.46687	9.86757	7.85755	6.74553	7.64242	7.62615	7.84466	7.65505	0.668489	3.59027	0.739851	0.479683	0.677233	-6.43748	NonSig	NonSwitched	Multi-promoter
938	ENSG00000108669	CYTH1	chr17	78782305	-	FALSE	1	KC-PB.2057.2	4.59524	7.81413	3.61539	7.50276	Major	Minor	5.06452	4.54199	4.95827	3.81619	3.43488	3.54956	3.88013	3.88148	3.3309	5.06452	8.46687	9.86757	7.85755	6.74553	7.64242	7.62615	7.84466	7.65505	-0.979855	4.05088	-3.59643	0.00654297	0.0577178	-2.45633	NonSig	NonSwitched	Multi-promoter
939	ENSG00000108671	PSMD11	chr17	32444501	+	FALSE	1	KC-PB.1928.1,KC-PB.1928.2	5.9362	5.9362	6.80424	6.80424	Major	Major	5.68647	6.3228	5.51136	6.22415	7.01657	6.76628	6.62026	6.64014	6.97797	5.68647	6.3228	5.51136	6.22415	7.01657	6.76628	6.62026	6.64014	6.97797	0.868048	6.41845	4.26326	0.00249569	0.0361802	-1.46749	NonSig	NonSwitched	Single-promoter
940	ENSG00000108773	KAT2A	chr17	42121367	-	FALSE	1	KC-PB.1955.1,KC-PB.1955.2	4.41544	4.41544	3.70012	3.70012	Major	Major	4.89998	3.92487	4.69489	4.142	4.23606	3.54956	3.81464	3.1256	3.77476	4.89998	3.92487	4.69489	4.142	4.23606	3.54956	3.81464	3.1256	3.77476	-0.715312	4.01804	-2.56432	0.0323123	0.145405	-4.06607	NonSig	NonSwitched	Single-promoter
941	ENSG00000108788	MLX	chr17	42567098	+	FALSE	1	KC-PB.1960.1	2.17	2.17	0	0	Major	Inactive	0	4.1056	4.57441	0	0	0	0	0	0	0	4.1056	4.57441	0	0	0	0	0	0	-2.17	0.964445	-2.13822	0.0635518	0.215458	-4.72436	NonSig	NonSwitched	Single-promoter
942	ENSG00000108829	LRRC59	chr17	50397508	-	FALSE	1	KC-PB.1991.1	5.42635	5.42635	7.08873	7.08873	Major	Major	5.87561	5.37635	5.51136	4.94209	7.06544	7.14719	7.42817	6.92135	6.88147	5.87561	5.37635	5.51136	4.94209	7.06544	7.14719	7.42817	6.92135	6.88147	1.66237	6.34989	8.04236	3.29902e-05	0.00378355	2.92491	UpReg	NonSwitched	Single-promoter
943	ENSG00000108848	LUC7L3	chr17	50719617	+	FALSE	1	KC-PB.1993.1,KC-PB.1993.2	6.67149	6.67149	6.97288	6.97288	Major	Major	5.68647	7.519	6.9475	6.53298	6.42224	6.80627	7.22889	7.58208	6.82494	5.68647	7.519	6.9475	6.53298	6.42224	6.80627	7.22889	7.58208	6.82494	0.301396	6.83893	0.785628	0.45381	0.658756	-6.40147	NonSig	NonSwitched	Single-promoter
944	ENSG00000108861	DUSP3	chr17	43778987	-	FALSE	1	KC-PB.1969.1,KC-PB.1969.2	4.7425	4.7425	4.36462	4.36462	Major	Major	3.32448	5.06307	4.63591	5.94654	4.01504	4.8348	4.61633	4.48966	3.86726	3.32448	5.06307	4.63591	5.94654	4.01504	4.8348	4.61633	4.48966	3.86726	-0.377882	4.53256	-0.775777	0.459298	0.662932	-6.40938	NonSig	NonSwitched	Single-promoter
945	ENSG00000108883	EFTUD2	chr17	44899448	-	FALSE	1	KC-PB.1974.1,KC-PB.1974.2,KC-PB.1974.3,KC-PB.1974.4	5.69228	5.69228	5.95737	5.95737	Major	Major	5.40876	5.92583	4.95827	6.47627	6.22985	5.95872	5.62533	5.73814	6.23479	5.40876	5.92583	4.95827	6.47627	6.22985	5.95872	5.62533	5.73814	6.23479	0.265085	5.83955	0.86197	0.412785	0.621274	-6.33734	NonSig	NonSwitched	Single-promoter
946	ENSG00000108946	PRKAR1A	chr17	68511942	+	FALSE	1	KC-PB.2035.1	2.45463	9.0547	2.78449	9.91896	Minor	Minor	3.03811	2.82388	3.95653	0	3.65521	3.11259	2.63885	2.62101	1.8948	9.11985	9.62433	10.4848	6.98984	11.0152	10.283	9.68005	9.73352	8.88311	0.329863	2.63789	0.43593	0.673944	0.831115	-6.62632	NonSig	NonSwitched	Multi-promoter
947	ENSG00000108946	PRKAR1A	chr17	68512421	+	FALSE	2	KC-PB.2035.3,KC-PB.2035.2,KC-PB.2035.5,KC-PB.2035.4	6.60007	9.0547	7.13447	9.91896	Major	Major	6.08174	6.80045	6.52827	6.98984	7.35997	7.17036	7.0412	7.11251	6.98831	9.11985	9.62433	10.4848	6.98984	11.0152	10.283	9.68005	9.73352	8.88311	0.534395	6.89696	2.7414	0.0244146	0.125425	-3.78801	NonSig	NonSwitched	Multi-promoter
948	ENSG00000109046	WSB1	chr17	27294080	+	FALSE	1	KC-PB.1915.1,KC-PB.1915.2,KC-PB.1915.3	5.69236	5.69236	4.91899	4.91899	Major	Major	5.40876	5.77379	5.4094	6.17749	4.54259	5.01625	5.10142	4.78752	5.14718	5.40876	5.77379	5.4094	6.17749	4.54259	5.01625	5.10142	4.78752	5.14718	-0.773367	5.26271	-3.69506	0.00565154	0.0527328	-2.30653	NonSig	NonSwitched	Single-promoter
949	ENSG00000109079	TNFAIP1	chr17	28335775	+	FALSE	1	KC-PB.1919.2	4.70246	4.70246	4.51095	4.51095	Major	Major	5.52633	4.41067	5.47817	3.39467	4.59679	4.15612	4.86306	4.48966	4.44913	5.52633	4.41067	5.47817	3.39467	4.59679	4.15612	4.86306	4.48966	4.44913	-0.191507	4.59607	-0.441238	0.670249	0.827399	-6.62381	NonSig	NonSwitched	Single-promoter
950	ENSG00000109089	CDR2L	chr17	74987632	+	FALSE	1	KC-PB.2044.1	1.24684	1.24684	1.25756	1.25756	Major	Major	2.20385	0	1.0268	1.75672	1.47738	2.02139	0	0.894243	1.8948	2.20385	0	1.0268	1.75672	1.47738	2.02139	0	0.894243	1.8948	0.0107202	1.2528	0.0193605	0.985008	1	-6.72984	NonSig	NonSwitched	Single-promoter
951	ENSG00000109133	TMEM33	chr4	41935137	+	FALSE	1	KC-PB.3268.2	7.10563	7.10563	7.17539	7.17539	Major	Major	7.03182	7.11715	6.73911	7.53445	7.18526	6.96486	7.27832	7.2409	7.2076	7.03182	7.11715	6.73911	7.53445	7.18526	6.96486	7.27832	7.2409	7.2076	0.0697514	7.14439	0.408652	0.693081	0.842648	-6.63877	NonSig	NonSwitched	Single-promoter
952	ENSG00000109184	DCUN1D4	chr4	51843131	+	FALSE	1	KC-PB.3280.1,KC-PB.3280.2,KC-PB.3280.3	3.98789	3.98789	4.03495	4.03495	Major	Major	3.56331	4.77344	4.22014	3.39467	3.75393	4.38463	3.59815	4.11387	4.32416	3.56331	4.77344	4.22014	3.39467	3.75393	4.38463	3.59815	4.11387	4.32416	0.0470572	4.01403	0.149346	0.884827	0.952623	-6.71775	NonSig	NonSwitched	Single-promoter
953	ENSG00000109189	USP46	chr4	52659298	-	FALSE	1	KC-PB.3279.1	4.71983	4.71983	4.6368	4.6368	Major	Major	4.50096	3.82525	5.13905	5.41405	4.92804	4.98174	3.81464	5.0716	4.38799	4.50096	3.82525	5.13905	5.41405	4.92804	4.98174	3.81464	5.0716	4.38799	-0.0830241	4.6737	-0.213952	0.835719	0.92515	-6.70484	NonSig	NonSwitched	Single-promoter
954	ENSG00000109220	CHIC2	chr4	54064654	-	FALSE	1	KC-PB.3281.1	4.74434	4.74434	3.67982	3.67982	Major	Major	5.28074	5.10616	3.21724	5.37322	3.75393	3.45209	3.88013	3.1256	4.18733	5.28074	5.10616	3.21724	5.37322	3.75393	3.45209	3.88013	3.1256	4.18733	-1.06452	4.15294	-2.30243	0.0489816	0.185244	-4.47342	NonSig	NonSwitched	Single-promoter
955	ENSG00000109320	NFKB1	chr4	102501372	+	FALSE	1	KC-PB.3343.1	5.12706	5.12706	5.40078	5.40078	Major	Major	5.63504	4.97284	4.95827	4.94209	5.12533	5.14658	5.37572	6.06856	5.28769	5.63504	4.97284	4.95827	4.94209	5.12533	5.14658	5.37572	6.06856	5.28769	0.273714	5.27912	1.12362	0.292453	0.516735	-6.08164	NonSig	NonSwitched	Single-promoter
956	ENSG00000109323	MANBA	chr4	102760954	-	FALSE	1	KC-PB.3342.1,KC-PB.3342.2	2.85559	2.85559	1.86663	1.86663	Major	Major	1.48725	3.33927	3.04658	3.54927	2.19183	0.819616	1.85366	2.97619	1.49184	1.48725	3.33927	3.04658	3.54927	2.19183	0.819616	1.85366	2.97619	1.49184	-0.988965	2.30617	-1.84066	0.101401	0.276653	-5.16436	NonSig	NonSwitched	Single-promoter
957	ENSG00000109332	UBE2D3	chr4	102827542	-	FALSE	2	KC-PB.3344.1	6.8036	10.8883	7.33318	12.2336	Major	Major	6.74697	6.8135	6.82082	6.83309	7.32025	7.39679	7.48717	7.33597	7.12571	10.3103	10.5317	10.7774	11.9336	12.2054	12.1106	12.2144	12.2926	12.3449	0.529581	7.09781	4.73878	0.00130546	0.025086	-0.800688	NonSig	NonSwitched	Multi-promoter
958	ENSG00000109332	UBE2D3	chr4	102828049	-	FALSE	1	KC-PB.3344.2	4.08465	10.8883	4.90041	12.2336	Minor	Minor	3.56331	3.71823	3.95653	5.10055	4.88513	4.71386	4.72727	4.95662	5.21915	10.3103	10.5317	10.7774	11.9336	12.2054	12.1106	12.2144	12.2926	12.3449	0.815751	4.53785	2.6328	0.0289887	0.138515	-3.95868	NonSig	NonSwitched	Multi-promoter
959	ENSG00000109436	TBC1D9	chr4	140756357	-	FALSE	1	KC-PB.3371.1	0.650258	0.650258	1.3913	1.3913	Major	Major	0	2.60103	0	0	1.47738	1.33906	1.20607	1.44216	1.49184	0	2.60103	0	0	1.47738	1.33906	1.20607	1.44216	1.49184	0.741045	1.06195	1.38789	0.201099	0.416128	-5.7747	NonSig	NonSwitched	Single-promoter
960	ENSG00000109586	GALNT7	chr4	173168770	+	FALSE	1	KC-PB.3411.1,KC-PB.3411.2,KC-PB.3411.3	0.761646	0.761646	1.33563	1.33563	Major	Major	0	0	3.04658	0	1.87839	1.33906	1.5659	0	1.8948	0	0	3.04658	0	1.87839	1.33906	1.5659	0	1.8948	0.573985	1.08053	0.799398	0.446213	0.651453	-6.39028	NonSig	NonSwitched	Single-promoter
961	ENSG00000109606	DHX15	chr4	24584542	-	FALSE	1	KC-PB.3251.1,KC-PB.3251.2	8.0042	8.0042	7.33657	7.33657	Major	Major	8.34712	7.94992	8.06973	7.65004	7.27941	7.48567	7.30837	7.41067	7.19873	8.34712	7.94992	8.06973	7.65004	7.27941	7.48567	7.30837	7.41067	7.19873	-0.667632	7.6333	-4.25207	0.00253502	0.0361928	-1.48357	NonSig	NonSwitched	Single-promoter
962	ENSG00000109667	SLC2A9	chr4	9893187	-	TRUE	2	KC-PB.3238.3	0.79179	1.55211	3.16938	5.6292	NA	NA	0	1.00966	1.0268	1.13069	2.6675	3.23485	2.7828	3.1256	4.03615	0	3.02413	2.05361	1.13069	5.33501	6.68695	4.3487	5.52974	6.24559	2.37759	2.11267	6.96773	9.4868e-05	0.00624548	1.87391	UpReg	NonSwitched	Multi-promoter
963	ENSG00000109667	SLC2A9	chr4	10021497	-	FALSE	1	KC-PB.3238.1,KC-PB.3238.2	0.760318	1.55211	2.45981	5.6292	Minor	Minor	0	2.01447	1.0268	0	2.6675	3.45209	1.5659	2.40413	2.20943	0	3.02413	2.05361	1.13069	5.33501	6.68695	4.3487	5.52974	6.24559	1.69949	1.70448	3.32375	0.00987305	0.0731608	-2.87575	NonSig	NonSwitched	Multi-promoter
964	ENSG00000109670	FBXW7	chr4	152352760	-	FALSE	1	KC-PB.3390.3	4.98912	4.98912	4.86976	4.86976	Major	Major	5.34617	5.60382	3.85674	5.14973	4.79527	4.3308	5.15533	4.99598	5.07144	5.34617	5.60382	3.85674	5.14973	4.79527	4.3308	5.15533	4.99598	5.07144	-0.119353	4.92281	-0.331524	0.748421	0.874949	-6.66977	NonSig	NonSwitched	Single-promoter
965	ENSG00000109674	NEIL3	chr4	177309840	+	FALSE	1	KC-PB.3416.1	1.54551	1.54551	3.3785	3.3785	Major	Major	0	0	2.04002	4.142	3.43488	2.48275	3.14445	3.96318	3.86726	0	0	2.04002	4.142	3.43488	2.48275	3.14445	3.96318	3.86726	1.833	2.56384	2.15961	0.0614363	0.213287	-4.69194	NonSig	NonSwitched	Single-promoter
966	ENSG00000109685	NSD2	chr4	1871379	+	FALSE	1	KC-PB.3230.1	4.50066	4.50066	4.48973	4.48973	Major	Major	4.89998	4.66235	4.2983	4.142	4.64903	4.67118	4.49613	4.37494	4.25737	4.89998	4.66235	4.2983	4.142	4.64903	4.67118	4.49613	4.37494	4.25737	-0.0109277	4.49459	-0.0589698	0.954364	0.994195	-6.72813	NonSig	NonSwitched	Single-promoter
967	ENSG00000109686	SH3D19	chr4	151325699	-	FALSE	1	KC-PB.3387.1	3.24235	3.24235	4.09517	4.09517	Major	Major	0	4.87658	3.85674	4.23608	3.75393	3.80776	3.94279	4.2503	4.72108	0	4.87658	3.85674	4.23608	3.75393	3.80776	3.94279	4.2503	4.72108	0.85282	3.71614	0.937635	0.37477	0.588735	-6.26891	NonSig	NonSwitched	Single-promoter
968	ENSG00000109787	KLF3	chr4	38664199	+	FALSE	1	KC-PB.3258.1	6.83598	6.83598	6.01459	6.01459	Major	Major	6.59376	6.90174	6.62243	7.22598	5.98766	5.74901	5.68152	6.1229	6.53185	6.59376	6.90174	6.62243	7.22598	5.98766	5.74901	5.68152	6.1229	6.53185	-0.821389	6.37965	-3.77437	0.00502842	0.0495332	-2.18689	NonSig	NonSwitched	Single-promoter
969	ENSG00000109805	NCAPG	chr4	17810982	+	FALSE	1	KC-PB.3245.1,KC-PB.3245.3,KC-PB.3245.2,KC-PB.3245.4	0.94204	0.94204	3.89258	3.89258	Major	Major	3.76816	0	0	0	3.17471	4.27489	3.43338	4.54377	4.03615	3.76816	0	0	0	3.17471	4.27489	3.43338	4.54377	4.03615	2.95054	2.58123	3.64951	0.00604601	0.0548305	-2.37557	NonSig	NonSwitched	Single-promoter
970	ENSG00000109814	UGDH	chr4	39527566	-	FALSE	1	KC-PB.3262.2,KC-PB.3262.1	4.16238	4.16238	5.51933	5.51933	Major	Major	3.76816	5.30417	5.05149	2.52571	5.67141	5.62032	5.07369	6.0121	5.21915	3.76816	5.30417	5.05149	2.52571	5.67141	5.62032	5.07369	6.0121	5.21915	1.35695	4.91624	2.45864	0.0382157	0.159832	-4.23123	NonSig	NonSwitched	Single-promoter
971	ENSG00000109920	FNBP4	chr11	47767316	-	FALSE	1	KC-PB.800.1	0	0	0	0	Inactive	Inactive	0	0	0	0	0	0	0	0	0	0	0	0	0	0	0	0	0	0	0	0	0	1	1	-6.73005	NonSig	NonSwitched	Single-promoter
972	ENSG00000109929	SC5D	chr11	121292771	+	FALSE	1	KC-PB.938.1	4.23315	4.23315	3.90227	3.90227	Major	Major	4.71422	3.60263	4.57441	4.04136	3.43488	4.09286	3.51811	3.79489	4.67063	4.71422	3.60263	4.57441	4.04136	3.43488	4.09286	3.51811	3.79489	4.67063	-0.330881	4.04933	-1.02235	0.335333	0.554727	-6.18685	NonSig	NonSwitched	Single-promoter
973	ENSG00000110002	VWA5A	chr11	124115450	+	FALSE	1	KC-PB.942.1	3.21909	3.21909	4.51798	4.51798	Major	Major	3.76816	1.00966	3.95653	4.142	4.96972	4.75531	4.36501	3.88148	4.61836	3.76816	1.00966	3.95653	4.142	4.96972	4.75531	4.36501	3.88148	4.61836	1.29889	3.94069	2.05161	0.072869	0.232049	-4.85469	NonSig	NonSwitched	Single-promoter
974	ENSG00000110047	EHD1	chr11	64878621	-	FALSE	1	KC-PB.835.1,KC-PB.835.2	5.18268	5.18268	4.98155	4.98155	Major	Major	4.81009	5.41112	5.22159	5.28793	4.30279	5.62032	5.2073	4.48966	5.28769	4.81009	5.41112	5.22159	5.28793	4.30279	5.62032	5.2073	4.48966	5.28769	-0.20113	5.07094	-0.681552	0.513987	0.706037	-6.48058	NonSig	NonSwitched	Single-promoter
975	ENSG00000110060	PUS3	chr11	125903209	-	FALSE	1	KC-PB.948.1,KC-PB.948.2	2.24072	2.24072	2.94489	2.94489	Major	Major	2.20385	1.59783	2.36458	2.79664	3.54925	3.34756	1.85366	2.40413	3.56983	2.20385	1.59783	2.36458	2.79664	3.54925	3.34756	1.85366	2.40413	3.56983	0.704162	2.63193	1.67026	0.131849	0.324042	-5.40424	NonSig	NonSwitched	Single-promoter
976	ENSG00000110075	PPP6R3	chr11	68460717	+	FALSE	1	KC-PB.851.1,KC-PB.851.2,KC-PB.851.3	5.56019	5.56019	5.68488	5.68488	Major	Major	5.73613	6.34095	5.22159	4.94209	5.88249	5.76939	5.25746	5.48512	6.02995	5.73613	6.34095	5.22159	4.94209	5.88249	5.76939	5.25746	5.48512	6.02995	0.12469	5.62946	0.414135	0.689215	0.839958	-6.63633	NonSig	NonSwitched	Single-promoter
977	ENSG00000110092	CCND1	chr11	69641156	+	FALSE	1	KC-PB.854.4,KC-PB.854.3,KC-PB.854.2,KC-PB.854.1	8.51352	8.51352	7.63532	7.63532	Major	Major	8.81404	8.35012	8.15622	8.7337	7.32025	8.06176	7.60324	7.47475	7.71658	8.81404	8.35012	8.15622	8.7337	7.32025	8.06176	7.60324	7.47475	7.71658	-0.8782	8.02563	-4.32724	0.00228287	0.0346821	-1.3758	NonSig	NonSwitched	Single-promoter
978	ENSG00000110172	CHORDC1	chr11	90223049	-	FALSE	1	KC-PB.879.1	4.09681	4.09681	4.02475	4.02475	Major	Major	4.107	3.92487	4.80607	3.54927	3.65521	4.3308	3.14445	4.37494	4.61836	4.107	3.92487	4.80607	3.54927	3.65521	4.3308	3.14445	4.37494	4.61836	-0.0720508	4.05678	-0.197478	0.848178	0.932367	-6.70857	NonSig	NonSwitched	Single-promoter
979	ENSG00000110218	PANX1	chr11	94128867	+	FALSE	1	KC-PB.885.1	4.5057	4.5057	5.24071	5.24071	Major	Major	4.61153	4.41067	4.85861	4.142	5.23192	4.8348	5.71781	5.03428	5.38476	4.61153	4.41067	4.85861	4.142	5.23192	4.8348	5.71781	5.03428	5.38476	0.735013	4.91404	3.35706	0.00938454	0.0708324	-2.82415	NonSig	NonSwitched	Single-promoter
980	ENSG00000110315	RNF141	chr11	10541187	-	FALSE	1	KC-PB.740.1	6.40797	6.40797	5.80835	5.80835	Major	Major	6.62045	6.37658	6.02957	6.60527	6.28041	5.82884	5.96423	5.10797	5.86029	6.62045	6.37658	6.02957	6.60527	6.28041	5.82884	5.96423	5.10797	5.86029	-0.59962	6.07485	-2.43437	0.0397179	0.164183	-4.26902	NonSig	NonSwitched	Single-promoter
981	ENSG00000110321	EIF4G2	chr11	10808934	-	FALSE	1	KC-PB.741.1,KC-PB.741.3,KC-PB.741.4,KC-PB.741.2,KC-PB.741.5,KC-PB.741.6	11.415	11.415	10.6812	10.6812	Major	Major	11.886	11.3883	11.2503	11.1353	10.8854	10.8568	10.8024	10.3038	10.5576	11.886	11.3883	11.2503	11.1353	10.8854	10.8568	10.8024	10.3038	10.5576	-0.733793	11.0073	-3.70129	0.00559972	0.0527328	-2.2971	NonSig	NonSwitched	Single-promoter
982	ENSG00000110328	GALNT18	chr11	11622005	-	FALSE	1	KC-PB.745.1,KC-PB.745.2	4.61494	4.61494	4.41596	4.41596	Major	Major	3.94751	5.57344	5.00563	3.93316	4.30279	4.91014	4.36501	4.11387	4.38799	3.94751	5.57344	5.00563	3.93316	4.30279	4.91014	4.36501	4.11387	4.38799	-0.198975	4.50439	-0.543091	0.601268	0.774473	-6.57006	NonSig	NonSwitched	Single-promoter
983	ENSG00000110330	BIRC2	chr11	102347240	+	TRUE	1	KC-PB.896.1,KC-PB.896.2,KC-PB.896.3	6.41752	6.41752	6.37186	6.37186	NA	NA	6.5106	5.87691	6.88555	6.39703	6.46658	6.011	6.79175	6.42635	6.16363	6.5106	5.87691	6.88555	6.39703	6.46658	6.011	6.79175	6.42635	6.16363	-0.0456627	6.39215	-0.192978	0.85159	0.932822	-6.70953	NonSig	NonSwitched	Single-promoter
984	ENSG00000110344	UBE4A	chr11	118359585	+	FALSE	1	KC-PB.930.1,KC-PB.930.2	4.46753	4.46753	5.28384	5.28384	Major	Major	4.71422	5.06307	3.85674	4.23608	5.59357	4.91014	5.2326	5.17808	5.5048	4.71422	5.06307	3.85674	4.23608	5.59357	4.91014	5.2326	5.17808	5.5048	0.816307	4.92103	3.08735	0.0142038	0.0901055	-3.24433	NonSig	NonSwitched	Single-promoter
985	ENSG00000110395	CBL	chr11	119206291	+	FALSE	1	KC-PB.935.1	3.61847	3.61847	4.24002	4.24002	Major	Major	3.94751	3.18706	2.853	4.4863	4.01504	4.15612	3.81464	4.59593	4.61836	3.94751	3.18706	2.853	4.4863	4.01504	4.15612	3.81464	4.59593	4.61836	0.621551	3.96377	1.76574	0.113876	0.298987	-5.27112	NonSig	NonSwitched	Single-promoter
986	ENSG00000110429	FBXO3	chr11	33774514	-	FALSE	1	KC-PB.775.1	5.87259	5.87259	6.17793	6.17793	Major	Major	5.46874	5.85181	5.75255	6.41725	6.31315	5.95872	6.00884	6.22579	6.38314	5.46874	5.85181	5.75255	6.41725	6.31315	5.95872	6.00884	6.22579	6.38314	0.305339	6.04222	1.49843	0.170856	0.375397	-5.63424	NonSig	NonSwitched	Single-promoter
987	ENSG00000110583	NAA40	chr11	63938984	+	FALSE	1	KC-PB.830.1	1.7493	1.7493	2.15489	2.15489	Major	Major	3.94751	1.00966	2.04002	0	1.47738	0.819616	3.03368	2.97619	2.46759	3.94751	1.00966	2.04002	0	1.47738	0.819616	3.03368	2.97619	2.46759	0.405594	1.97463	0.494707	0.633567	0.798982	-6.5969	NonSig	NonSwitched	Single-promoter
988	ENSG00000110660	SLC35F2	chr11	107858808	-	FALSE	1	KC-PB.904.1	4.50277	4.50277	4.14949	4.14949	Major	Major	4.50096	5.148	4.22014	4.142	4.42767	3.72672	3.34335	4.74195	4.50777	4.50096	5.148	4.22014	4.142	4.42767	3.72672	3.34335	4.74195	4.50777	-0.353282	4.30651	-1.03331	0.33047	0.551558	-6.17583	NonSig	NonSwitched	Single-promoter
989	ENSG00000110713	NUP98	chr11	3797553	-	FALSE	1	KC-PB.729.1	6.07253	6.07253	5.6371	5.6371	Major	Major	6.26207	5.85181	6.20213	5.9741	5.76905	5.74901	5.46381	5.48512	5.71851	6.26207	5.85181	6.20213	5.9741	5.76905	5.74901	5.46381	5.48512	5.71851	-0.435427	5.83062	-3.13843	0.0131237	0.0873687	-3.16439	NonSig	NonSwitched	Single-promoter
990	ENSG00000110721	CHKA	chr11	68121391	-	FALSE	1	KC-PB.850.1	0.909463	0.909463	0.765008	0.765008	Major	Major	0	1.59783	2.04002	0	0.920075	1.33906	1.5659	0	0	0	1.59783	2.04002	0	0.920075	1.33906	1.5659	0	0	-0.144455	0.82921	-0.259933	0.801213	0.90624	-6.6929	NonSig	NonSwitched	Single-promoter
991	ENSG00000110723	EXPH5	chr11	108593599	-	FALSE	1	KC-PB.910.1	6.22047	6.22047	5.67171	5.67171	Major	Major	5.40876	7.15868	6.16089	6.15358	5.72106	5.2945	5.42044	5.93321	5.98937	5.40876	7.15868	6.16089	6.15358	5.72106	5.2945	5.42044	5.93321	5.98937	-0.54876	5.91561	-1.63845	0.138395	0.333104	-5.4478	NonSig	NonSwitched	Single-promoter
992	ENSG00000110768	GTF2H1	chr11	18322553	+	FALSE	1	KC-PB.763.2,KC-PB.763.4,KC-PB.763.3	5.6793	5.6793	5.89903	5.89903	Major	Major	4.9846	5.87691	6.11843	5.73726	6.10451	6.09412	5.54683	6.03117	5.71851	4.9846	5.87691	6.11843	5.73726	6.10451	6.09412	5.54683	6.03117	5.71851	0.219728	5.80137	0.890801	0.397988	0.610634	-6.31182	NonSig	NonSwitched	Single-promoter
993	ENSG00000110851	PRDM4	chr12	107761136	-	FALSE	1	KC-PB.1170.1	3.96471	3.96471	3.64315	3.64315	Major	Major	3.76816	5.26668	4.2983	2.52571	3.31065	3.34756	4.22076	3.88148	3.45531	3.76816	5.26668	4.2983	2.52571	3.31065	3.34756	4.22076	3.88148	3.45531	-0.32156	3.78607	-0.639064	0.539921	0.727328	-6.50999	NonSig	NonSwitched	Single-promoter
994	ENSG00000110880	CORO1C	chr12	108731527	-	FALSE	1	KC-PB.1172.1,KC-PB.1172.2	6.00341	6.00341	5.63823	5.63823	Major	Major	6.74697	5.69131	6.20213	5.37322	5.90415	5.8093	5.7532	5.33975	5.38476	6.74697	5.69131	6.20213	5.37322	5.90415	5.8093	5.7532	5.33975	5.38476	-0.365176	5.80053	-1.27996	0.234989	0.458022	-5.9053	NonSig	NonSwitched	Single-promoter
995	ENSG00000110906	KCTD10	chr12	109477300	-	FALSE	1	KC-PB.1175.1	4.51002	4.51002	5.15724	5.15724	Major	Major	3.32448	4.26618	5.29967	5.14973	5.36281	4.94638	5.15533	5.21189	5.10981	3.32448	4.26618	5.29967	5.14973	5.36281	4.94638	5.15533	5.21189	5.10981	0.64723	4.86959	1.68208	0.12949	0.320569	-5.38795	NonSig	NonSwitched	Single-promoter
996	ENSG00000110911	SLC11A2	chr12	51026388	-	FALSE	1	KC-PB.1050.1,KC-PB.1050.2	1.58292	1.58292	1.74929	1.74929	Major	Major	0	2.82388	3.5078	0	1.87839	2.02139	1.20607	2.14878	1.49184	0	2.82388	3.5078	0	1.87839	2.02139	1.20607	2.14878	1.49184	0.166374	1.67535	0.215794	0.834329	0.924865	-6.70441	NonSig	NonSwitched	Single-promoter
997	ENSG00000110917	MLEC	chr12	120687145	+	FALSE	1	KC-PB.1204.1,KC-PB.1204.2,KC-PB.1204.3	4.84358	4.84358	5.57049	5.57049	Major	Major	5.28074	4.47782	4.37244	5.24332	5.86051	5.52767	5.12863	5.64219	5.69346	5.28074	4.47782	4.37244	5.24332	5.86051	5.52767	5.12863	5.64219	5.69346	0.726912	5.24742	2.90122	0.0189872	0.106972	-3.53657	NonSig	NonSwitched	Single-promoter
998	ENSG00000110931	CAMKK2	chr12	121296728	-	FALSE	1	KC-PB.1211.1,KC-PB.1211.2	4.41713	4.41713	3.80903	3.80903	Major	Major	4.25061	3.82525	4.44295	5.14973	4.36658	3.54956	4.06048	3.49871	3.56983	4.25061	3.82525	4.44295	5.14973	4.36658	3.54956	4.06048	3.49871	3.56983	-0.608101	4.0793	-2.02861	0.0755583	0.235046	-4.88902	NonSig	NonSwitched	Single-promoter
999	ENSG00000110987	BCL7A	chr12	122021884	+	FALSE	1	KC-PB.1213.1,KC-PB.1213.2,KC-PB.1213.3	4.23293	4.23293	5.48218	5.48218	Major	Major	4.89998	5.06307	4.44295	2.52571	5.33118	5.20758	5.80471	5.59171	5.47571	4.89998	5.06307	4.44295	2.52571	5.33118	5.20758	5.80471	5.59171	5.47571	1.24925	4.92696	2.54655	0.0332365	0.147143	-4.0939	NonSig	NonSwitched	Single-promoter
1000	ENSG00000111142	METAP2	chr12	95474114	+	FALSE	1	KC-PB.1135.1,KC-PB.1135.2	6.89412	6.89412	6.94899	6.94899	Major	Major	6.6724	7.22858	6.87284	6.80266	6.71958	6.956	7.02681	6.87988	7.16268	6.6724	7.22858	6.87284	6.80266	6.71958	6.956	7.02681	6.87988	7.16268	0.0548699	6.9246	0.358195	0.729089	0.864226	-6.65976	NonSig	NonSwitched	Single-promoter
1001	ENSG00000111144	LTA4H	chr12	96035592	-	FALSE	1	KC-PB.1136.1	7.3193	7.3193	7.26119	7.26119	Major	Major	7.39856	6.98489	7.44513	7.44863	7.11271	7.11571	7.19712	7.47475	7.40565	7.39856	6.98489	7.44513	7.44863	7.11271	7.11571	7.19712	7.47475	7.40565	-0.058117	7.28702	-0.385899	0.709223	0.85265	-6.64857	NonSig	NonSwitched	Single-promoter
1002	ENSG00000111145	ELK3	chr12	96194384	+	FALSE	1	KC-PB.1137.1,KC-PB.1137.2,KC-PB.1137.3,KC-PB.1137.4	6.23395	6.23395	6.19584	6.19584	Major	Major	6.04281	6.30442	6.31923	6.26935	5.76905	6.35902	6.10786	6.44068	6.30262	6.04281	6.30442	6.31923	6.26935	5.76905	6.35902	6.10786	6.44068	6.30262	-0.0381051	6.21278	-0.233464	0.821026	0.917532	-6.70005	NonSig	NonSwitched	Single-promoter
1003	ENSG00000111206	FOXM1	chr12	2877077	-	FALSE	1	KC-PB.967.1	2.22286	2.22286	4.36182	4.36182	Major	Major	3.32448	2.01447	1.0268	2.52571	4.01504	4.09286	4.76244	4.48966	4.44913	3.32448	2.01447	1.0268	2.52571	4.01504	4.09286	4.76244	4.48966	4.44913	2.13896	3.41118	5.0612	0.000857244	0.0189286	-0.368133	UpReg	NonSwitched	Single-promoter
1004	ENSG00000111300	NAA25	chr12	112108785	-	FALSE	1	KC-PB.1186.1	3.7705	3.7705	4.12939	4.12939	Major	Major	4.107	3.01687	3.63373	4.3244	4.36658	4.27489	4.36501	3.60434	4.03615	4.107	3.01687	3.63373	4.3244	4.36658	4.27489	4.36501	3.60434	4.03615	0.358896	3.96989	1.22953	0.252405	0.474801	-5.96392	NonSig	NonSwitched	Single-promoter
1005	ENSG00000111331	OAS3	chr12	112938402	+	FALSE	1	KC-PB.1194.1	2.87242	2.87242	3.72257	3.72257	Major	Major	3.03811	3.18706	3.5078	1.75672	3.17471	4.15612	4.36501	4.04049	2.8765	3.03811	3.18706	3.5078	1.75672	3.17471	4.15612	4.36501	4.04049	2.8765	0.850145	3.34472	1.91664	0.0900734	0.259158	-5.05424	NonSig	NonSwitched	Single-promoter
1006	ENSG00000111358	GTF2H3	chr12	123633810	+	FALSE	1	KC-PB.1218.1,KC-PB.1218.3	3.73808	3.73808	4.72296	4.72296	Major	Major	4.107	4.60343	3.21724	3.02465	4.69944	4.98174	4.95712	4.11387	4.86261	4.107	4.60343	3.21724	3.02465	4.69944	4.98174	4.95712	4.11387	4.86261	0.984879	4.28523	2.77614	0.0231128	0.121547	-3.73335	NonSig	NonSwitched	Single-promoter
1007	ENSG00000111371	SLC38A1	chr12	46207609	-	TRUE	3	KC-PB.1028.14	6.08114	19.5702	6.4117	19.8962	NA	NA	6.48177	6.14827	6.20213	5.49239	6.2126	6.21789	6.4256	6.51028	6.69216	20.2991	18.3296	19.8987	19.7534	19.8305	19.4412	19.7806	20.2165	20.2123	0.330564	6.26479	1.54571	0.159202	0.360401	-5.5723	NonSig	NonSwitched	Multi-promoter
1008	ENSG00000111371	SLC38A1	chr12	46243316	-	TRUE	2	KC-PB.1028.12	7.01005	19.5702	7.00701	19.8962	NA	NA	7.33552	6.46198	6.97155	7.27112	6.98644	6.86425	7.05545	7.1824	6.94652	20.2991	18.3296	19.8987	19.7534	19.8305	19.4412	19.7806	20.2165	20.2123	-0.00303378	7.00836	-0.015732	0.987818	1	-6.72991	NonSig	NonSwitched	Multi-promoter
1009	ENSG00000111371	SLC38A1	chr12	46269187	-	FALSE	1	KC-PB.1028.5,KC-PB.1028.4,KC-PB.1028.2,KC-PB.1028.9,KC-PB.1028.6,KC-PB.1028.3,KC-PB.1028.1,KC-PB.1028.8,KC-PB.1028.15,KC-PB.1028.16,KC-PB.1028.17	6.47899	19.5702	6.4775	19.8962	Minor	Minor	6.48177	5.71933	6.72503	6.98984	6.63145	6.35902	6.2996	6.5238	6.57362	20.2991	18.3296	19.8987	19.7534	19.8305	19.4412	19.7806	20.2165	20.2123	-0.00149667	6.47816	-0.00604859	0.995316	1	-6.73003	NonSig	NonSwitched	Multi-promoter
1010	ENSG00000111424	VDR	chr12	47905022	-	FALSE	1	KC-PB.1033.2,KC-PB.1033.1,KC-PB.1033.3	3.84689	3.84689	4.46906	4.46906	Major	Major	3.94751	3.82525	4.22014	3.39467	4.79527	4.4866	4.36501	3.88148	4.81696	3.94751	3.82525	4.22014	3.39467	4.79527	4.4866	4.36501	3.88148	4.81696	0.622173	4.19254	2.56123	0.0324716	0.145903	-4.07092	NonSig	NonSwitched	Single-promoter
1011	ENSG00000111530	CAND1	chr12	67269343	+	FALSE	1	KC-PB.1095.1,KC-PB.1095.2,KC-PB.1095.3,KC-PB.1095.4,KC-PB.1095.5,KC-PB.1095.6,KC-PB.1095.8,KC-PB.1095.7	6.38432	6.38432	6.93704	6.93704	Major	Major	6.08174	6.9733	6.28124	6.20101	6.65718	7.13153	6.92962	7.0854	6.88147	6.08174	6.9733	6.28124	6.20101	6.65718	7.13153	6.92962	7.0854	6.88147	0.552717	6.69139	2.69488	0.0262763	0.130517	-3.86116	NonSig	NonSwitched	Single-promoter
1012	ENSG00000111540	RAB5B	chr12	55974090	+	FALSE	1	KC-PB.1065.1,KC-PB.1065.2	3.08558	3.08558	3.68052	3.68052	Major	Major	2.68046	1.00966	4.51018	4.142	3.93314	2.97901	3.88013	4.04049	3.56983	2.68046	1.00966	4.51018	4.142	3.93314	2.97901	3.88013	4.04049	3.56983	0.594945	3.4161	0.878149	0.404434	0.615321	-6.32311	NonSig	NonSwitched	Single-promoter
1013	ENSG00000111581	NUP107	chr12	68686967	+	FALSE	1	KC-PB.1096.1,KC-PB.1096.2,KC-PB.1096.4	4.39203	4.39203	4.63118	4.63118	Major	Major	3.94751	5.10616	4.37244	4.142	4.42767	4.3308	4.8951	4.83169	4.67063	3.94751	5.10616	4.37244	4.142	4.42767	4.3308	4.8951	4.83169	4.67063	0.239153	4.52489	0.952277	0.367718	0.584371	-6.25513	NonSig	NonSwitched	Single-promoter
1014	ENSG00000111596	CNOT2	chr12	70242996	+	FALSE	1	KC-PB.1105.1,KC-PB.1105.2,KC-PB.1105.3	5.42499	5.42499	5.44663	5.44663	Major	Major	4.89998	5.63358	6.28124	4.88515	5.69644	4.87296	5.35283	5.80613	5.5048	4.89998	5.63358	6.28124	4.88515	5.69644	4.87296	5.35283	5.80613	5.5048	0.0216448	5.43701	0.0653778	0.949412	0.990655	-6.72769	NonSig	NonSwitched	Single-promoter
1015	ENSG00000111602	TIMELESS	chr12	56449406	-	FALSE	1	KC-PB.1073.1	1.96685	1.96685	3.57872	3.57872	Major	Major	2.68046	1.00966	3.04658	1.13069	3.43488	3.95734	3.34335	3.70276	3.45531	2.68046	1.00966	3.04658	1.13069	3.43488	3.95734	3.34335	3.70276	3.45531	1.61187	2.86234	3.61039	0.00640818	0.0570955	-2.43506	NonSig	NonSwitched	Single-promoter
1016	ENSG00000111605	CPSF6	chr12	69239572	+	FALSE	1	KC-PB.1099.1,KC-PB.1099.2	5.81556	5.81556	6.47983	6.47983	Major	Major	6.04281	6.93797	5.18091	5.10055	6.77939	6.67202	6.09413	6.45487	6.39872	6.04281	6.93797	5.18091	5.10055	6.77939	6.67202	6.09413	6.45487	6.39872	0.664267	6.1846	1.7526	0.116206	0.302205	-5.28964	NonSig	NonSwitched	Single-promoter
1017	ENSG00000111615	KRR1	chr12	75511610	-	FALSE	1	KC-PB.1108.1	5.20912	5.20912	5.95958	5.95958	Major	Major	5.46874	5.10616	4.69489	5.56669	6.40715	6.04482	5.35283	6.22579	5.76733	5.46874	5.10616	4.69489	5.56669	6.40715	6.04482	5.35283	6.22579	5.76733	0.750464	5.62605	2.82369	0.0214452	0.116216	-3.65853	NonSig	NonSwitched	Single-promoter
1018	ENSG00000111647	BLTP3B	chr12	100142883	-	FALSE	1	KC-PB.1145.1	3.2559	3.2559	4.35382	4.35382	Major	Major	0	3.47695	5.13905	4.40762	4.8409	3.34756	4.11591	4.6949	4.76981	0	3.47695	5.13905	4.40762	4.8409	3.34756	4.11591	4.6949	4.76981	1.09791	3.86586	1.13761	0.286885	0.511217	-6.06653	NonSig	NonSwitched	Single-promoter
1019	ENSG00000111667	USP5	chr12	6852143	+	FALSE	1	KC-PB.972.1	5.03318	5.03318	5.24794	5.24794	Major	Major	4.50096	4.82593	5.00563	5.80021	5.33118	5.14658	5.30593	5.30883	5.14718	4.50096	4.82593	5.00563	5.80021	5.33118	5.14658	5.30593	5.30883	5.14718	0.214758	5.15249	0.879464	0.403761	0.615062	-6.32194	NonSig	NonSwitched	Single-promoter
1020	ENSG00000111670	GNPTAB	chr12	101830858	-	FALSE	1	KC-PB.1149.1,KC-PB.1149.2	5.12542	5.12542	5.03226	5.03226	Major	Major	4.38121	5.63358	5.33718	5.14973	5.39375	4.87296	4.98716	5.39967	4.50777	4.38121	5.63358	5.33718	5.14973	5.39375	4.87296	4.98716	5.39967	4.50777	-0.0931629	5.07367	-0.318998	0.757566	0.880528	-6.67421	NonSig	NonSwitched	Single-promoter
1021	ENSG00000111707	SUDS3	chr12	118376512	+	FALSE	1	KC-PB.1200.1,KC-PB.1200.2	5.88157	5.88157	5.72751	5.72751	Major	Major	5.68647	5.41112	6.42753	6.00115	5.01022	5.92279	5.93371	5.93321	5.8376	5.68647	5.41112	6.42753	6.00115	5.01022	5.92279	5.93371	5.93321	5.8376	-0.154062	5.79598	-0.565293	0.586746	0.761707	-6.55696	NonSig	NonSwitched	Single-promoter
1022	ENSG00000111711	GOLT1B	chr12	21501803	+	FALSE	1	KC-PB.995.1,KC-PB.995.2,KC-PB.995.3	5.27863	5.27863	5.40733	5.40733	Major	Major	4.71422	5.60382	5.69593	5.10055	5.19726	5.82884	5.2326	5.45719	5.32078	4.71422	5.60382	5.69593	5.10055	5.19726	5.82884	5.2326	5.45719	5.32078	0.128701	5.35013	0.541247	0.602482	0.775461	-6.57113	NonSig	NonSwitched	Single-promoter
1023	ENSG00000111716	LDHB	chr12	21657842	-	FALSE	1	KC-PB.991.1,KC-PB.991.2	5.33522	5.33522	6.15388	6.15388	Major	Major	5.52633	5.85181	6.02957	3.93316	6.43717	6.011	6.28758	6.29052	5.74313	5.52633	5.85181	6.02957	3.93316	6.43717	6.011	6.28758	6.29052	5.74313	0.818659	5.79003	1.96675	0.083274	0.249154	-4.98071	NonSig	NonSwitched	Single-promoter
1024	ENSG00000111731	C2CD5	chr12	22544554	-	FALSE	1	KC-PB.992.1	3.24595	3.24595	2.68269	2.68269	Major	Major	2.20385	3.47695	3.36982	3.93316	2.19183	4.53501	2.63885	1.83831	2.20943	2.20385	3.47695	3.36982	3.93316	2.19183	4.53501	2.63885	1.83831	2.20943	-0.563262	2.93302	-0.959296	0.364373	0.582178	-6.24847	NonSig	NonSwitched	Single-promoter
1025	ENSG00000111737	RAB35	chr12	120116831	-	FALSE	1	KC-PB.1198.1	5.72935	5.72935	5.89856	5.89856	Major	Major	5.46874	5.57344	5.47817	6.39703	5.74525	5.70738	5.96423	6.38248	5.69346	5.46874	5.57344	5.47817	6.39703	5.74525	5.70738	5.96423	6.38248	5.69346	0.169216	5.82335	0.695487	0.505652	0.697552	-6.47056	NonSig	NonSwitched	Single-promoter
1026	ENSG00000111785	RIC8B	chr12	106774649	+	FALSE	1	KC-PB.1166.1	2.03356	2.03356	1.87345	1.87345	Major	Major	3.76816	3.33927	1.0268	0	2.85709	2.27043	1.85366	0.894243	1.49184	3.76816	3.33927	1.0268	0	2.85709	2.27043	1.85366	0.894243	1.49184	-0.160107	1.94461	-0.197011	0.848532	0.932453	-6.70867	NonSig	NonSwitched	Single-promoter
1027	ENSG00000111790	FGFR1OP2	chr12	26938437	+	FALSE	1	KC-PB.998.1,KC-PB.998.2,KC-PB.998.3,KC-PB.998.4	4.82755	4.82755	4.97105	4.97105	Major	Major	4.38121	5.71933	4.51018	4.69946	4.8409	5.32235	5.44229	4.74195	4.50777	4.38121	5.71933	4.51018	4.69946	4.8409	5.32235	5.44229	4.74195	4.50777	0.143507	4.90727	0.448673	0.665089	0.824887	-6.62024	NonSig	NonSwitched	Single-promoter
1028	ENSG00000111817	DSE	chr6	116370947	+	FALSE	1	KC-PB.3830.1,KC-PB.3830.2,KC-PB.3830.3	5.80918	5.80918	5.25409	5.25409	Major	Major	5.63504	6.01896	5.47817	6.10454	5.4828	5.26611	5.52652	5.17808	4.81696	5.63504	6.01896	5.47817	6.10454	5.4828	5.26611	5.52652	5.17808	4.81696	-0.555085	5.5008	-2.75876	0.023755	0.123662	-3.7607	NonSig	NonSwitched	Single-promoter
1029	ENSG00000111845	PAK1IP1	chr6	10694947	+	FALSE	1	KC-PB.3686.1	4.54811	4.54811	4.89086	4.89086	Major	Major	4.38121	4.77344	5.22159	3.81619	4.96972	4.91014	4.61633	5.33975	4.61836	4.38121	4.77344	5.22159	3.81619	4.96972	4.91014	4.61633	5.33975	4.61836	0.34275	4.73853	1.17363	0.272948	0.496641	-6.027	NonSig	NonSwitched	Single-promoter
1030	ENSG00000111875	ASF1A	chr6	118894169	+	FALSE	1	KC-PB.3836.1	5.3842	5.3842	5.74162	5.74162	Major	Major	4.89998	6.06336	4.37244	6.20101	5.67141	5.64258	5.7532	5.84975	5.79114	4.89998	6.06336	4.37244	6.20101	5.67141	5.64258	5.7532	5.84975	5.79114	0.357419	5.58276	0.959821	0.364124	0.582178	-6.24797	NonSig	NonSwitched	Single-promoter
1031	ENSG00000111877	MCM9	chr6	118935165	-	FALSE	1	KC-PB.3835.1	1.74286	1.74286	2.85635	2.85635	Major	Major	0	3.92487	3.04658	0	2.19183	3.80776	4.16929	2.62101	1.49184	0	3.92487	3.04658	0	2.19183	3.80776	4.16929	2.62101	1.49184	1.11348	2.36147	1.14043	0.285774	0.510516	-6.06346	NonSig	NonSwitched	Single-promoter
1032	ENSG00000111880	RNGTT	chr6	88963618	-	FALSE	1	KC-PB.3793.1,KC-PB.3793.2	3.61343	3.61343	3.71805	3.71805	Major	Major	4.25061	2.01447	4.37244	3.81619	2.19183	3.45209	4.8951	4.59593	3.45531	4.25061	2.01447	4.37244	3.81619	2.19183	3.45209	4.8951	4.59593	3.45531	0.104624	3.67155	0.15582	0.879878	0.95057	-6.71666	NonSig	NonSwitched	Single-promoter
1033	ENSG00000111897	SERINC1	chr6	122471807	-	FALSE	1	KC-PB.3840.1,KC-PB.3840.2	7.36956	7.36956	7.26598	7.26598	Major	Major	6.59376	7.66302	7.75331	7.46815	7.39863	7.0506	7.31431	7.35879	7.2076	6.59376	7.66302	7.75331	7.46815	7.39863	7.0506	7.31431	7.35879	7.2076	-0.103576	7.31202	-0.429319	0.67856	0.834122	-6.62941	NonSig	NonSwitched	Single-promoter
1034	ENSG00000112031	MTRF1L	chr6	153002734	-	FALSE	1	KC-PB.3876.2,KC-PB.3876.5,KC-PB.3876.1,KC-PB.3876.4,KC-PB.3876.3	3.15848	3.15848	4.11971	4.11971	Major	Major	2.20385	4.01806	4.22014	2.19185	4.30279	4.53501	4.11591	4.31397	3.3309	2.20385	4.01806	4.22014	2.19185	4.30279	4.53501	4.11591	4.31397	3.3309	0.961237	3.6925	1.90262	0.0920692	0.262685	-5.0747	NonSig	NonSwitched	Single-promoter
1035	ENSG00000112062	MAPK14	chr6	36027747	+	FALSE	1	KC-PB.3723.1	5.85039	5.85039	5.73897	5.73897	Major	Major	6.04281	5.01866	5.75255	6.58753	5.33118	5.8093	5.83806	5.97319	5.74313	6.04281	5.01866	5.75255	6.58753	5.33118	5.8093	5.83806	5.97319	5.74313	-0.111417	5.78849	-0.370871	0.719971	0.858892	-6.65474	NonSig	NonSwitched	Single-promoter
1036	ENSG00000112078	KCTD20	chr6	36442989	+	FALSE	1	KC-PB.3725.1	4.35924	4.35924	3.7733	3.7733	Major	Major	4.25061	4.1056	3.74954	5.33121	3.93314	3.80776	3.14445	4.11387	3.86726	4.25061	4.1056	3.74954	5.33121	3.93314	3.80776	3.14445	4.11387	3.86726	-0.585943	4.03372	-1.74306	0.117926	0.304671	-5.30305	NonSig	NonSwitched	Single-promoter
1037	ENSG00000112079	STK38	chr6	36547461	-	FALSE	1	KC-PB.3729.1	5.02048	5.02048	4.0214	4.0214	Major	Major	5.28074	4.47782	4.9093	5.41405	4.54259	4.09286	3.81464	3.70276	3.95417	5.28074	4.47782	4.9093	5.41405	4.54259	4.09286	3.81464	3.70276	3.95417	-0.999076	4.46544	-4.08161	0.00322472	0.0409424	-1.73098	NonSig	NonSwitched	Single-promoter
1038	ENSG00000112081	SRSF3	chr6	36594361	+	FALSE	1	KC-PB.3726.1	7.88661	7.88661	8.25876	8.25876	Major	Major	7.59975	7.82653	7.74635	8.37382	8.71235	8.25477	8.13632	8.09827	8.09207	7.59975	7.82653	7.74635	8.37382	8.71235	8.25477	8.13632	8.09827	8.09207	0.372142	8.09336	1.82235	0.104325	0.28268	-5.19062	NonSig	NonSwitched	Single-promoter
1039	ENSG00000112118	MCM3	chr6	52284742	-	FALSE	1	KC-PB.3753.1,KC-PB.3753.2	5.19745	5.19745	6.65158	6.65158	Major	Major	4.50096	5.80027	5.72452	4.76405	6.88118	6.92	6.41459	6.45487	6.58729	4.50096	5.80027	5.72452	4.76405	6.88118	6.92	6.41459	6.45487	6.58729	1.45413	6.0053	4.81135	0.00118598	0.0236899	-0.701928	UpReg	NonSwitched	Single-promoter
1040	ENSG00000112200	ZNF451	chr6	57090040	+	FALSE	1	KC-PB.3765.1,KC-PB.3765.2,KC-PB.3765.3	3.96711	3.96711	3.40586	3.40586	Major	Major	4.25061	3.92487	4.2983	3.39467	3.43488	3.72672	2.91369	3.49871	3.45531	4.25061	3.92487	4.2983	3.39467	3.43488	3.72672	2.91369	3.49871	3.45531	-0.561253	3.65531	-2.37836	0.0434152	0.173417	-4.35604	NonSig	NonSwitched	Single-promoter
1041	ENSG00000112210	RAB23	chr6	57222305	-	FALSE	1	KC-PB.3764.1	2.98391	2.98391	3.41076	3.41076	Major	Major	2.20385	3.60263	4.37244	1.75672	3.43488	4.67118	2.29902	3.60434	3.04437	2.20385	3.60263	4.37244	1.75672	3.43488	4.67118	2.29902	3.60434	3.04437	0.42685	3.22105	0.667753	0.522325	0.711715	-6.49032	NonSig	NonSwitched	Single-promoter
1042	ENSG00000112234	FBXL4	chr6	98947969	-	FALSE	1	KC-PB.3800.2,KC-PB.3800.1	4.19102	4.19102	4.22743	4.22743	Major	Major	3.94751	3.18706	4.2983	5.33121	4.16608	3.88449	4.45374	4.1837	4.44913	3.94751	3.18706	4.2983	5.33121	4.16608	3.88449	4.45374	4.1837	4.44913	0.0364076	4.21124	0.094401	0.927018	0.977929	-6.72513	NonSig	NonSwitched	Single-promoter
1043	ENSG00000112242	E2F3	chr6	20402491	+	FALSE	1	KC-PB.3697.1	0.584339	0.584339	1.61278	1.61278	Major	Major	0	2.33736	0	0	0	2.66779	3.24733	2.14878	0	0	2.33736	0	0	0	2.66779	3.24733	2.14878	0	1.02844	1.1557	1.20419	0.261555	0.483782	-5.99278	NonSig	NonSwitched	Single-promoter
1044	ENSG00000112245	PTP4A1	chr6	63572480	+	FALSE	1	KC-PB.3766.2,KC-PB.3766.1	6.98694	6.98694	7.82696	7.82696	Major	Major	6.62045	7.58902	7.15077	6.58753	7.98582	7.98979	7.95822	7.66986	7.53111	6.62045	7.58902	7.15077	6.58753	7.98582	7.98979	7.95822	7.66986	7.53111	0.840017	7.45362	3.58099	0.00669547	0.0588627	-2.47988	NonSig	NonSwitched	Single-promoter
1045	ENSG00000112249	ASCC3	chr6	100881364	-	FALSE	1	KC-PB.3808.1,KC-PB.3808.2	5.2076	5.2076	5.72391	5.72391	Major	Major	5.40876	5.18865	4.37244	5.86053	5.56667	5.88594	6.09413	5.45719	5.61561	5.40876	5.18865	4.37244	5.86053	5.56667	5.88594	6.09413	5.45719	5.61561	0.516312	5.49444	1.76241	0.114463	0.300085	-5.27582	NonSig	NonSwitched	Single-promoter
1046	ENSG00000112282	MED23	chr6	131628168	-	FALSE	1	KC-PB.3848.1	4.18095	4.18095	3.75653	3.75653	Major	Major	5.21221	4.1056	3.85674	3.54927	3.75393	4.43651	3.03368	3.60434	3.95417	5.21221	4.1056	3.85674	3.54927	3.75393	4.43651	3.03368	3.60434	3.95417	-0.424429	3.94516	-1.09692	0.303314	0.527019	-6.1101	NonSig	NonSwitched	Single-promoter
1047	ENSG00000112290	WASF1	chr6	110180009	-	FALSE	1	KC-PB.3819.1	0	0	0.888549	0.888549	Inactive	Major	0	0	0	0	0	1.33906	0	0.894243	2.20943	0	0	0	0	0	1.33906	0	0.894243	2.20943	0.888549	0.493638	1.99394	0.0797939	0.241625	-4.94053	NonSig	NonSwitched	Single-promoter
1048	ENSG00000112305	SMAP1	chr6	70667913	+	FALSE	1	KC-PB.3767.1	4.8482	4.8482	5.13863	5.13863	Major	Major	5.06452	5.2282	3.85674	5.24332	5.5113	4.58184	5.42044	4.99598	5.18361	5.06452	5.2282	3.85674	5.24332	5.5113	4.58184	5.42044	4.99598	5.18361	0.290437	5.00955	0.876329	0.405368	0.615321	-6.32472	NonSig	NonSwitched	Single-promoter
1049	ENSG00000112339	HBS1L	chr6	135054822	-	FALSE	1	KC-PB.3851.1,KC-PB.3851.2	5.54744	5.54744	5.81399	5.81399	Major	Major	4.50096	6.01896	5.78005	5.88977	5.76905	5.8093	6.03783	5.48512	5.96864	4.50096	6.01896	5.78005	5.88977	5.76905	5.8093	6.03783	5.48512	5.96864	0.266552	5.69552	0.84876	0.419692	0.627421	-6.34879	NonSig	NonSwitched	Single-promoter
1050	ENSG00000112343	TRIM38	chr6	25962800	+	FALSE	1	KC-PB.3705.1	1.49688	1.49688	1.98393	1.98393	Major	Major	3.94751	0	2.04002	0	2.19183	2.83177	1.5659	1.83831	1.49184	3.94751	0	2.04002	0	2.19183	2.83177	1.5659	1.83831	1.49184	0.487049	1.76746	0.602038	0.563144	0.743124	-6.53423	NonSig	NonSwitched	Single-promoter
1051	ENSG00000112367	FIG4	chr6	109691297	+	FALSE	1	KC-PB.3816.1	3.02558	3.02558	3.96355	3.96355	Major	Major	3.03811	5.30417	2.62936	1.13069	3.17471	4.02669	4.31851	4.04049	4.25737	3.03811	5.30417	2.62936	1.13069	3.17471	4.02669	4.31851	4.04049	4.25737	0.937969	3.54668	1.2812	0.234576	0.457779	-5.90385	NonSig	NonSwitched	Single-promoter
1052	ENSG00000112378	PERP	chr6	138107450	-	FALSE	1	KC-PB.3856.1	11.1897	11.1897	10.6743	10.6743	Major	Major	11.1711	10.9894	10.792	11.8065	10.7948	10.4778	10.8481	10.4842	10.7664	11.1711	10.9894	10.792	11.8065	10.7948	10.4778	10.8481	10.4842	10.7664	-0.515475	10.9034	-2.38937	0.0426623	0.171496	-4.33896	NonSig	NonSwitched	Single-promoter
1053	ENSG00000112419	PHACTR2	chr6	143677940	+	FALSE	1	KC-PB.3865.1	1.86756	1.86756	3.56559	3.56559	Major	Major	0	4.71896	1.62059	1.13069	3.65521	2.97901	3.81464	3.60434	3.77476	0	4.71896	1.62059	1.13069	3.65521	2.97901	3.81464	3.60434	3.77476	1.69803	2.81091	2.04093	0.074106	0.233345	-4.87065	NonSig	NonSwitched	Single-promoter
1054	ENSG00000112584	FAM120B	chr6	170306758	+	FALSE	1	KC-PB.4476.1,KC-PB.4476.2	0	0	0	0	Inactive	Inactive	0	0	0	0	0	0	0	0	0	0	0	0	0	0	0	0	0	0	0	0	0	1	1	-6.73005	NonSig	NonSwitched	Single-promoter
1055	ENSG00000112640	PPP2R5D	chr6	42984577	+	FALSE	1	KC-PB.3737.2	3.56919	3.56919	4.65124	4.65124	Major	Major	4.50096	2.33736	3.74954	3.6889	5.59357	4.3308	4.45374	4.31397	4.56413	4.50096	2.33736	3.74954	3.6889	5.59357	4.3308	4.45374	4.31397	4.56413	1.08205	4.17033	2.40969	0.0413065	0.168207	-4.3074	NonSig	NonSwitched	Single-promoter
1056	ENSG00000112655	PTK7	chr6	43076287	+	FALSE	1	KC-PB.3739.1	4.90671	4.90671	4.22479	4.22479	Major	Major	5.28074	4.1056	4.9093	5.33121	3.65521	4.38463	4.79676	3.96318	4.32416	5.28074	4.1056	4.9093	5.33121	3.65521	4.38463	4.79676	3.96318	4.32416	-0.681925	4.52787	-2.14555	0.0628194	0.214733	-4.71327	NonSig	NonSwitched	Single-promoter
1057	ENSG00000112685	EXOC2	chr6	693130	-	FALSE	1	KC-PB.3677.1,KC-PB.3677.2	4.14351	4.14351	4.6206	4.6206	Major	Major	3.94751	3.33927	4.13751	5.14973	4.69944	4.43651	4.06048	4.87455	5.03202	3.94751	3.33927	4.13751	5.14973	4.69944	4.43651	4.06048	4.87455	5.03202	0.477096	4.40856	1.31494	0.22351	0.444666	-5.86372	NonSig	NonSwitched	Single-promoter
1058	ENSG00000112697	TMEM30A	chr6	75284769	-	FALSE	1	KC-PB.3776.1,KC-PB.3776.2	7.95021	7.95021	7.89874	7.89874	Major	Major	8.03624	7.71265	8.20268	7.84925	7.69419	7.9635	7.9733	7.97075	7.89195	8.03624	7.71265	8.20268	7.84925	7.69419	7.9635	7.9733	7.97075	7.89195	-0.0514682	7.92161	-0.374244	0.717553	0.857649	-6.65337	NonSig	NonSwitched	Single-promoter
1059	ENSG00000112739	PRP4K	chr6	4021409	+	FALSE	1	KC-PB.3678.1	5.69398	5.69398	6.08744	6.08744	Major	Major	5.06452	6.01896	6.31923	5.37322	6.0666	5.6861	5.9182	6.32183	6.44447	5.06452	6.01896	6.31923	5.37322	6.0666	5.6861	5.9182	6.32183	6.44447	0.393458	5.91257	1.3724	0.20569	0.421899	-5.79386	NonSig	NonSwitched	Single-promoter
1060	ENSG00000112742	TTK	chr6	80004608	+	FALSE	1	KC-PB.3780.1,KC-PB.3780.3,KC-PB.3780.4	1.04509	1.04509	2.91861	2.91861	Major	Major	0	1.00966	2.04002	1.13069	3.43488	0.819616	2.47892	4.1837	3.67594	0	1.00966	2.04002	1.13069	3.43488	0.819616	2.47892	4.1837	3.67594	1.87351	2.08594	2.64765	0.028315	0.136211	-3.93537	NonSig	NonSwitched	Single-promoter
1061	ENSG00000112874	NUDT12	chr5	103562789	-	FALSE	1	KC-PB.3554.1,KC-PB.3554.2	3.06163	3.06163	3.83646	3.83646	Major	Major	4.38121	2.01447	2.62936	3.22149	3.43488	4.38463	3.03368	4.37494	3.95417	4.38121	2.01447	2.62936	3.22149	3.43488	4.38463	3.03368	4.37494	3.95417	0.774828	3.49209	1.55303	0.157462	0.359292	-5.56261	NonSig	NonSwitched	Single-promoter
1062	ENSG00000112893	MAN2A1	chr5	109689400	+	FALSE	1	KC-PB.3557.1,KC-PB.3557.2	4.35777	8.65298	4.59379	9.11691	Major	Major	5.34617	3.71823	3.36982	4.99687	4.48627	4.3308	4.16929	4.6949	5.28769	9.84713	8.05846	7.66812	9.03823	8.41941	8.42366	9.37659	9.56945	9.79546	0.236019	4.48889	0.529902	0.609984	0.782524	-6.57761	NonSig	NonSwitched	Multi-promoter
1063	ENSG00000112893	MAN2A1	chr5	109865048	+	TRUE	2	KC-PB.3557.4,KC-PB.3557.3	4.29521	8.65298	4.52312	9.11691	NA	NA	4.50096	4.34023	4.2983	4.04136	3.93314	4.09286	5.2073	4.87455	4.50777	9.84713	8.05846	7.66812	9.03823	8.41941	8.42366	9.37659	9.56945	9.79546	0.227911	4.42183	0.832497	0.428306	0.635409	-6.36269	NonSig	NonSwitched	Multi-promoter
1064	ENSG00000112972	HMGCS1	chr5	43313412	-	FALSE	1	KC-PB.3471.1,KC-PB.3471.4,KC-PB.3471.5,KC-PB.3471.3,KC-PB.3471.6,KC-PB.3471.7,KC-PB.3471.8	5.85613	5.85613	5.29076	5.29076	Major	Major	4.9846	5.66273	5.88509	6.89208	4.88513	4.91014	5.62533	5.33975	5.69346	4.9846	5.66273	5.88509	6.89208	4.88513	4.91014	5.62533	5.33975	5.69346	-0.565364	5.54203	-1.50619	0.168894	0.372931	-5.62416	NonSig	NonSwitched	Single-promoter
1065	ENSG00000112983	BRD8	chr5	138178630	-	FALSE	1	KC-PB.3596.1,KC-PB.3596.2,KC-PB.3596.3	2.64428	2.64428	2.81059	2.81059	Major	Major	0	4.41067	3.36982	2.79664	2.44918	3.11259	2.63885	3.38474	2.46759	0	4.41067	3.36982	2.79664	2.44918	3.11259	2.63885	3.38474	2.46759	0.166308	2.73668	0.211046	0.837914	0.926239	-6.70552	NonSig	NonSwitched	Single-promoter
1066	ENSG00000112984	KIF20A	chr5	138179112	+	FALSE	1	KC-PB.3597.2,KC-PB.3597.1,KC-PB.3597.3	1.85852	1.85852	4.36917	4.36917	Major	Major	0	3.01687	1.62059	2.79664	3.93314	4.75531	3.67398	5.03428	4.44913	0	3.01687	1.62059	2.79664	3.93314	4.75531	3.67398	5.03428	4.44913	2.51064	3.25333	4.04071	0.00341854	0.0416417	-1.79094	UpReg	NonSwitched	Single-promoter
1067	ENSG00000112992	NNT	chr5	43603184	+	FALSE	1	KC-PB.3472.1	2.14853	2.14853	2.55224	2.55224	Major	Major	3.03811	2.33736	1.0268	2.19185	3.17471	3.95734	2.29902	1.83831	1.49184	3.03811	2.33736	1.0268	2.19185	3.17471	3.95734	2.29902	1.83831	1.49184	0.403713	2.37282	0.692493	0.507436	0.69947	-6.47273	NonSig	NonSwitched	Single-promoter
1068	ENSG00000113013	HSPA9	chr5	138575411	-	FALSE	1	KC-PB.3601.1,KC-PB.3601.2	7.20926	7.20926	7.70385	7.70385	Major	Major	7.23547	7.35899	7.07509	7.16749	7.87504	7.58672	7.71516	7.82541	7.51691	7.23547	7.35899	7.07509	7.16749	7.87504	7.58672	7.71516	7.82541	7.51691	0.494589	7.48403	3.94227	0.00393798	0.0432084	-1.9362	NonSig	NonSwitched	Single-promoter
1069	ENSG00000113048	MRPS27	chr5	72320229	-	FALSE	1	KC-PB.3511.1	5.5757	5.5757	6.483	6.483	Major	Major	5.34617	5.92583	5.83353	5.19728	6.57856	6.76628	5.99413	6.72456	6.35147	5.34617	5.92583	5.83353	5.19728	6.57856	6.76628	5.99413	6.72456	6.35147	0.907294	6.07976	4.01906	0.00352612	0.0416417	-1.82277	NonSig	NonSwitched	Single-promoter
1070	ENSG00000113140	SPARC	chr5	151686933	-	FALSE	1	KC-PB.3643.1	6.93312	6.93312	6.62918	6.62918	Major	Major	6.39168	7.26706	6.78055	7.29318	6.7438	6.90165	6.43653	6.39725	6.66664	6.39168	7.26706	6.78055	7.29318	6.7438	6.90165	6.43653	6.39725	6.66664	-0.30394	6.76426	-1.38477	0.202016	0.41754	-5.77857	NonSig	NonSwitched	Single-promoter
1071	ENSG00000113161	HMGCR	chr5	75337219	+	FALSE	1	KC-PB.3517.1,KC-PB.3517.2,KC-PB.3517.3,KC-PB.3517.4,KC-PB.3517.5,KC-PB.3517.6,KC-PB.3517.7	4.48074	4.48074	3.60113	3.60113	Major	Major	4.9846	4.47782	3.21724	5.24332	4.16608	3.11259	4.27047	3.1256	3.3309	4.9846	4.47782	3.21724	5.24332	4.16608	3.11259	4.27047	3.1256	3.3309	-0.879616	3.99207	-1.9199	0.089616	0.258521	-5.04949	NonSig	NonSwitched	Single-promoter
1072	ENSG00000113163	CERT1	chr5	75511620	-	FALSE	1	KC-PB.3521.1	4.54972	4.54972	3.78116	3.78116	Major	Major	3.94751	4.82593	4.13751	5.28793	4.30279	3.54956	3.34335	3.26098	4.44913	3.94751	4.82593	4.13751	5.28793	4.30279	3.54956	3.34335	3.26098	4.44913	-0.768559	4.12274	-2.07506	0.0702228	0.227984	-4.81956	NonSig	NonSwitched	Single-promoter
1073	ENSG00000113194	FAF2	chr5	176448385	+	FALSE	1	KC-PB.3665.1	4.75024	4.75024	5.16036	5.16036	Major	Major	4.9846	4.97284	4.63591	4.40762	5.01022	5.47902	4.98716	5.0716	5.25382	4.9846	4.97284	4.63591	4.40762	5.01022	5.47902	4.98716	5.0716	5.25382	0.410124	4.97809	2.35639	0.0449574	0.176601	-4.39007	NonSig	NonSwitched	Single-promoter
1074	ENSG00000113282	CLINT1	chr5	157859142	-	FALSE	1	KC-PB.3646.1,KC-PB.3646.2,KC-PB.3646.4,KC-PB.3646.3,KC-PB.3646.5	6.17746	6.17746	5.98555	5.98555	Major	Major	6.26207	6.49478	6.00647	5.94654	5.26577	6.46275	5.6061	6.29052	6.30262	6.26207	6.49478	6.00647	5.94654	5.26577	6.46275	5.6061	6.29052	6.30262	-0.191911	6.07085	-0.691155	0.508234	0.700028	-6.47369	NonSig	NonSwitched	Single-promoter
1075	ENSG00000113356	POLR3G	chr5	90474864	+	FALSE	1	KC-PB.3538.1,KC-PB.3538.2	0	0	2.43059	2.43059	Inactive	Major	0	0	0	0	2.6675	2.27043	2.91369	2.80951	1.49184	0	0	0	0	2.6675	2.27043	2.91369	2.80951	1.49184	2.43059	1.35033	8.55757	2.06711e-05	0.00341917	3.38241	UpReg	Switched	Single-promoter
1076	ENSG00000113368	LMNB1	chr5	126777150	+	FALSE	1	KC-PB.3576.1	5.05554	5.05554	6.65452	6.65452	Major	Major	5.68647	4.41067	5.983	4.142	6.56503	6.76628	7.05545	6.55048	6.33537	5.68647	4.41067	5.983	4.142	6.56503	6.76628	7.05545	6.55048	6.33537	1.59898	5.94386	4.00328	0.00360681	0.0416425	-1.84601	UpReg	NonSwitched	Single-promoter
1077	ENSG00000113369	ARRDC3	chr5	91383316	-	FALSE	1	KC-PB.3539.1	7.2395	7.2395	7.21571	7.21571	Major	Major	7.05157	7.11715	6.9475	7.84179	7.25433	6.93811	6.86637	7.48861	7.53111	7.05157	7.11715	6.9475	7.84179	7.25433	6.93811	6.86637	7.48861	7.53111	-0.0237944	7.22628	-0.101016	0.921923	0.973399	-6.72442	NonSig	NonSwitched	Single-promoter
1078	ENSG00000113387	SUB1	chr5	32585572	+	FALSE	1	KC-PB.3449.1	6.24621	6.24621	7.41795	7.41795	Major	Major	5.78414	6.35887	6.44481	6.39703	7.59116	7.16268	7.24762	7.47475	7.61354	5.78414	6.35887	6.44481	6.39703	7.59116	7.16268	7.24762	7.47475	7.61354	1.17173	6.89718	6.45969	0.000163164	0.00837317	1.32676	UpReg	NonSwitched	Single-promoter
1079	ENSG00000113407	TARS1	chr5	33440977	+	FALSE	1	KC-PB.3451.1,KC-PB.3451.2	5.40354	5.40354	6.13904	6.13904	Major	Major	5.52633	5.01866	5.69593	5.37322	6.14145	5.82884	5.94905	6.5238	6.25205	5.52633	5.01866	5.69593	5.37322	6.14145	5.82884	5.94905	6.5238	6.25205	0.735502	5.81215	3.78873	0.0049236	0.0492028	-2.1653	NonSig	NonSwitched	Single-promoter
1080	ENSG00000113430	IRX4	chr5	1887342	-	FALSE	1	KC-PB.3432.1	0.371812	0.371812	0.687876	0.687876	Major	Major	1.48725	0	0	0	0	1.33906	1.20607	0.894243	0	1.48725	0	0	0	0	1.33906	1.20607	0.894243	0	0.316063	0.547403	0.727912	0.486585	0.683179	-6.44656	NonSig	NonSwitched	Single-promoter
1081	ENSG00000113441	LNPEP	chr5	96936080	+	FALSE	1	KC-PB.3546.1,KC-PB.3546.2	5.10029	5.10029	4.32665	4.32665	Major	Major	5.46874	5.2282	4.13751	5.56669	4.01504	4.67118	4.95712	4.31397	3.67594	5.46874	5.2282	4.13751	5.56669	4.01504	4.67118	4.95712	4.31397	3.67594	-0.773637	4.67049	-2.11153	0.0662925	0.219575	-4.7647	NonSig	NonSwitched	Single-promoter
1082	ENSG00000113569	NUP155	chr5	37371095	-	FALSE	1	KC-PB.3459.1	6.03585	6.03585	6.4137	6.4137	Major	Major	6.11966	6.39407	4.69489	6.93479	6.3919	6.3988	6.92186	6.1923	6.16363	6.11966	6.39407	4.69489	6.93479	6.3919	6.3988	6.92186	6.1923	6.16363	0.377846	6.24577	0.900087	0.393304	0.606368	-6.30346	NonSig	NonSwitched	Single-promoter
1083	ENSG00000113575	PPP2CA	chr5	134226071	-	FALSE	1	KC-PB.3590.1	7.72407	7.72407	8.06033	8.06033	Major	Major	7.39856	7.78072	7.75331	7.96367	8.19794	7.98108	8.19541	7.74685	8.18035	7.39856	7.78072	7.75331	7.96367	8.19794	7.98108	8.19541	7.74685	8.18035	0.336258	7.91088	2.09072	0.0685083	0.22509	-4.79604	NonSig	NonSwitched	Single-promoter
1084	ENSG00000113580	NR3C1	chr5	143404561	-	FALSE	1	KC-PB.3618.2	5.81508	5.81508	4.50506	4.50506	Major	Major	6.11966	6.04133	5.18091	5.91843	4.96972	5.08288	4.31851	4.04049	4.11372	6.11966	6.04133	5.18091	5.91843	4.96972	5.08288	4.31851	4.04049	4.11372	-1.31002	5.0873	-4.37016	0.00215111	0.0336304	-1.31464	DownReg	NonSwitched	Single-promoter
1085	ENSG00000113597	TRAPPC13	chr5	65625038	+	FALSE	1	KC-PB.3493.1	4.44321	4.44321	5.03694	5.03694	Major	Major	4.25061	5.148	4.04986	4.3244	5.56667	5.11508	4.57737	4.74195	5.18361	4.25061	5.148	4.04986	4.3244	5.56667	5.11508	4.57737	4.74195	5.18361	0.593722	4.77306	2.11227	0.0662148	0.219575	-4.76358	NonSig	NonSwitched	Single-promoter
1086	ENSG00000113648	MACROH2A1	chr5	135399229	-	FALSE	1	KC-PB.3593.1	6.91455	6.91455	7.23824	7.23824	Major	Major	7.18272	6.5109	6.57611	7.38844	7.31217	7.35695	7.36666	6.83718	7.31824	7.18272	6.5109	6.57611	7.38844	7.31217	7.35695	7.36666	6.83718	7.31824	0.323696	7.09438	1.44286	0.185521	0.396112	-5.70566	NonSig	NonSwitched	Single-promoter
1087	ENSG00000113649	TCERG1	chr5	146447312	+	FALSE	1	KC-PB.3626.1,KC-PB.3626.2	5.23681	5.23681	4.77984	4.77984	Major	Major	5.06452	5.74682	5.13905	4.99687	4.59679	4.58184	5.2819	4.87455	4.56413	5.06452	5.74682	5.13905	4.99687	4.59679	4.58184	5.2819	4.87455	4.56413	-0.456974	4.98294	-2.08211	0.069446	0.226288	-4.80898	NonSig	NonSwitched	Single-promoter
1088	ENSG00000113658	SMAD5	chr5	136132861	+	FALSE	1	KC-PB.3595.1	4.78983	4.78983	4.80571	4.80571	Major	Major	4.71422	4.54199	5.13905	4.76405	4.54259	4.4866	4.76244	4.91617	5.32078	4.71422	4.54199	5.13905	4.76405	4.54259	4.4866	4.76244	4.91617	5.32078	0.0158874	4.79865	0.07667	0.940692	0.986654	-6.7268	NonSig	NonSwitched	Single-promoter
1089	ENSG00000113712	CSNK1A1	chr5	149551436	-	FALSE	1	KC-PB.3632.1,KC-PB.3632.5,KC-PB.3632.9,KC-PB.3632.8,KC-PB.3632.12	8.29927	8.29927	8.69387	8.69387	Major	Major	8.21325	8.16385	8.44098	8.37899	8.69382	8.61709	8.85504	8.48804	8.81536	8.21325	8.16385	8.44098	8.37899	8.69382	8.61709	8.85504	8.48804	8.81536	0.394603	8.51849	3.11643	0.0135781	0.0884615	-3.19881	NonSig	NonSwitched	Single-promoter
1090	ENSG00000113716	HMGXB3	chr5	150000701	+	FALSE	1	KC-PB.3633.1	4.75108	4.75108	4.92859	4.92859	Major	Major	4.38121	4.54199	5.13905	4.94209	5.01022	5.2945	5.2073	4.31397	4.81696	4.38121	4.54199	5.13905	4.94209	5.01022	5.2945	5.2073	4.31397	4.81696	0.177506	4.8497	0.718436	0.492109	0.686617	-6.45367	NonSig	NonSwitched	Single-promoter
1091	ENSG00000113719	ERGIC1	chr5	172834331	+	FALSE	1	KC-PB.3660.1,KC-PB.3660.2	5.55161	5.55161	5.16222	5.16222	Major	Major	5.78414	5.2282	5.78005	5.41405	5.76905	5.04995	4.79676	4.87455	5.32078	5.78414	5.2282	5.78005	5.41405	5.76905	5.04995	4.79676	4.87455	5.32078	-0.389391	5.33528	-1.67004	0.131892	0.324042	-5.40453	NonSig	NonSwitched	Single-promoter
1092	ENSG00000113742	CPEB4	chr5	173918195	+	FALSE	1	KC-PB.3661.1	0	0	0.295476	0.295476	Inactive	Major	0	0	0	0	1.47738	0	0	0	0	0	0	0	0	1.47738	0	0	0	0	0.295476	0.164153	0.922596	0.382115	0.595219	-6.28289	NonSig	NonSwitched	Single-promoter
1093	ENSG00000113761	ZNF346	chr5	177022696	+	FALSE	1	KC-PB.3666.1	4.36538	4.36538	3.42345	3.42345	Major	Major	4.89998	4.60343	3.63373	4.3244	3.17471	3.23485	2.63885	3.88148	4.18733	4.89998	4.60343	3.63373	4.3244	3.17471	3.23485	2.63885	3.88148	4.18733	-0.941936	3.84208	-2.54427	0.0333568	0.147341	-4.09746	NonSig	NonSwitched	Single-promoter
1094	ENSG00000113790	EHHADH	chr3	185254049	-	FALSE	1	KC-PB.3184.1	2.42607	2.42607	3.62544	3.62544	Major	Major	2.68046	1.59783	2.62936	2.79664	3.43488	3.45209	3.59815	3.38474	4.25737	2.68046	1.59783	2.62936	2.79664	3.43488	3.45209	3.59815	3.38474	4.25737	1.19937	3.09239	4.07083	0.00327463	0.0409699	-1.74676	UpReg	NonSwitched	Single-promoter
1095	ENSG00000113845	TIMMDC1	chr3	119498533	+	FALSE	1	KC-PB.3076.1	5.94903	5.94903	6.32497	6.32497	Major	Major	5.8306	5.69131	6.09672	6.17749	6.37649	6.11018	6.6393	6.46892	6.02995	5.8306	5.69131	6.09672	6.17749	6.37649	6.11018	6.6393	6.46892	6.02995	0.37594	6.15789	2.15203	0.0621784	0.21431	-4.70345	NonSig	NonSwitched	Single-promoter
1096	ENSG00000113851	CRBN	chr3	3179695	-	FALSE	1	KC-PB.2912.1	5.24937	5.24937	5.38205	5.38205	Major	Major	4.9846	5.71933	5.00563	5.28793	5.23192	5.08288	4.95712	6.10501	5.53331	4.9846	5.71933	5.00563	5.28793	5.23192	5.08288	4.95712	6.10501	5.53331	0.132676	5.32308	0.492455	0.635091	0.80062	-6.59809	NonSig	NonSwitched	Single-promoter
1097	ENSG00000114019	AMOTL2	chr3	134374517	-	FALSE	1	KC-PB.3113.1,KC-PB.3113.2,KC-PB.3113.3	4.55533	4.55533	3.4619	3.4619	Major	Major	4.61153	4.82593	3.36982	5.41405	4.09253	3.23485	2.09346	4.11387	3.77476	4.61153	4.82593	3.36982	5.41405	4.09253	3.23485	2.09346	4.11387	3.77476	-1.09343	3.94787	-2.061	0.0717984	0.230502	-4.84065	NonSig	NonSwitched	Single-promoter
1098	ENSG00000114030	KPNA1	chr3	122514937	-	FALSE	1	KC-PB.3084.1,KC-PB.3084.2,KC-PB.3084.3,KC-PB.3084.4,KC-PB.3084.5,KC-PB.3084.6	5.13826	5.13826	5.34191	5.34191	Major	Major	4.89998	5.01866	5.26116	5.37322	5.5113	5.08288	5.48502	5.27724	5.35312	4.89998	5.01866	5.26116	5.37322	5.5113	5.08288	5.48502	5.27724	5.35312	0.203657	5.2514	1.35632	0.210549	0.428449	-5.8136	NonSig	NonSwitched	Single-promoter
1099	ENSG00000114062	UBE3A	chr15	25439015	-	FALSE	1	KC-PB.1519.1,KC-PB.1519.2,KC-PB.1519.3,KC-PB.1519.4	5.31416	5.31416	5.11142	5.11142	Major	Major	5.96163	5.2282	4.57441	5.49239	4.88513	5.11508	4.69123	5.51251	5.35312	5.96163	5.2282	4.57441	5.49239	4.88513	5.11508	4.69123	5.51251	5.35312	-0.202741	5.20152	-0.688353	0.509908	0.70179	-6.47571	NonSig	NonSwitched	Single-promoter
1100	ENSG00000114120	SLC25A36	chr3	140941847	+	FALSE	1	KC-PB.3123.1	4.97801	4.97801	4.19354	4.19354	Major	Major	4.89998	5.30417	5.22159	4.4863	4.8409	3.88449	3.81464	4.31397	4.11372	4.89998	5.30417	5.22159	4.4863	4.8409	3.88449	3.81464	4.31397	4.11372	-0.784469	4.54219	-3.02314	0.0156941	0.0948051	-3.345	NonSig	NonSwitched	Single-promoter
1101	ENSG00000114127	XRN1	chr3	142448017	-	FALSE	1	KC-PB.3127.1	5.4043	5.4043	4.70725	4.70725	Major	Major	5.78414	4.77344	4.85861	6.20101	5.39375	4.27489	4.27047	5.33975	4.25737	5.78414	4.77344	4.85861	6.20101	5.39375	4.27489	4.27047	5.33975	4.25737	-0.697053	5.01705	-1.70981	0.124106	0.31158	-5.34951	NonSig	NonSwitched	Single-promoter
1102	ENSG00000114316	USP4	chr3	49340068	-	FALSE	1	KC-PB.2998.1,KC-PB.2998.2,KC-PB.2998.3	3.9944	3.9944	3.29194	3.29194	Major	Major	4.107	2.82388	4.04986	4.99687	4.09253	3.72672	3.14445	2.80951	2.68648	4.107	2.82388	4.04986	4.99687	4.09253	3.72672	3.14445	2.80951	2.68648	-0.702463	3.60414	-1.51296	0.167196	0.371397	-5.61532	NonSig	NonSwitched	Single-promoter
1103	ENSG00000114331	ACAP2	chr3	195443010	-	FALSE	1	KC-PB.3204.1	5.48847	5.48847	5.26339	5.26339	Major	Major	5.06452	5.30417	5.66676	5.91843	5.74525	5.1774	5.2326	5.21189	4.9498	5.06452	5.30417	5.66676	5.91843	5.74525	5.1774	5.2326	5.21189	4.9498	-0.225083	5.36343	-1.0062	0.342598	0.561779	-6.20293	NonSig	NonSwitched	Single-promoter
1104	ENSG00000114346	ECT2	chr3	172750681	+	FALSE	1	KC-PB.3170.1,KC-PB.3170.2,KC-PB.3170.3,KC-PB.3170.4,KC-PB.3170.5,KC-PB.3170.6	3.5003	3.5003	6.01161	6.01161	Major	Major	2.20385	3.92487	3.04658	4.82587	5.86051	5.86716	5.78774	6.17526	6.36739	2.20385	3.92487	3.04658	4.82587	5.86051	5.86716	5.78774	6.17526	6.36739	2.51132	4.89547	5.2601	0.000666275	0.016113	-0.109266	UpReg	NonSwitched	Single-promoter
1105	ENSG00000114353	GNAI2	chr3	50226721	+	FALSE	1	KC-PB.3004.1	0	0	0	0	Inactive	Inactive	0	0	0	0	0	0	0	0	0	0	0	0	0	0	0	0	0	0	0	0	0	1	1	-6.73005	NonSig	NonSwitched	Single-promoter
1106	ENSG00000114354	TFG	chr3	100709563	+	FALSE	1	KC-PB.3052.1	6.14277	6.14277	6.05207	6.05207	Major	Major	5.8306	5.92583	6.31923	6.49542	6.08568	6.011	6.00884	6.10501	6.04983	5.8306	5.92583	6.31923	6.49542	6.08568	6.011	6.00884	6.10501	6.04983	-0.0906996	6.09238	-0.573618	0.581351	0.758145	-6.55193	NonSig	NonSwitched	Single-promoter
1107	ENSG00000114423	CBLB	chr3	105869039	-	FALSE	1	KC-PB.3060.1	1.01623	1.01623	1.01418	1.01418	Major	Major	3.03811	0	1.0268	0	1.87839	0.819616	0	1.44216	0.930726	3.03811	0	1.0268	0	1.87839	0.819616	0	1.44216	0.930726	-0.00205097	1.01509	-0.00306341	0.997628	1	-6.73004	NonSig	NonSwitched	Single-promoter
1108	ENSG00000114439	BBX	chr3	107522946	+	FALSE	1	KC-PB.3063.1,KC-PB.3063.2	5.87331	10.7383	5.79157	10.5318	Major	Major	5.8306	5.06307	5.63699	6.96258	5.26577	5.84813	5.96423	5.84975	6.02995	9.39391	10.6669	11.5221	11.3702	10.276	10.43	10.8593	10.8064	10.2873	-0.0817445	5.8279	-0.225993	0.826643	0.920651	-6.70194	NonSig	NonSwitched	Multi-promoter
1109	ENSG00000114439	BBX	chr3	107772845	+	TRUE	2	KC-PB.3063.3,KC-PB.3063.5	4.86496	10.7383	4.74023	10.5318	NA	NA	3.56331	5.60382	5.88509	4.40762	5.01022	4.58184	4.8951	4.95662	4.25737	9.39391	10.6669	11.5221	11.3702	10.276	10.43	10.8593	10.8064	10.2873	-0.124731	4.79567	-0.266976	0.795967	0.903185	-6.69086	NonSig	NonSwitched	Multi-promoter
1110	ENSG00000114450	GNB4	chr3	179451470	-	FALSE	1	KC-PB.3176.1,KC-PB.3176.2	5.38866	5.38866	5.62796	5.62796	Major	Major	5.06452	5.47826	5.4094	5.60246	5.74525	5.88594	5.18155	5.51251	5.81456	5.06452	5.47826	5.4094	5.60246	5.74525	5.88594	5.18155	5.51251	5.81456	0.239305	5.52161	1.28506	0.233286	0.456933	-5.89929	NonSig	NonSwitched	Single-promoter
1111	ENSG00000114520	SNX4	chr3	125520204	-	FALSE	1	KC-PB.3090.1	2.82477	2.82477	4.24997	4.24997	Major	Major	3.32448	4.01806	3.95653	0	4.09253	4.38463	4.16929	4.48966	4.11372	3.32448	4.01806	3.95653	0	4.09253	4.38463	4.16929	4.48966	4.11372	1.4252	3.61654	1.83272	0.10266	0.279445	-5.17577	NonSig	NonSwitched	Single-promoter
1112	ENSG00000114529	C3orf52	chr3	112086391	+	FALSE	1	KC-PB.3069.1	6.19253	6.19253	4.84227	4.84227	Major	Major	6.08174	5.71933	6.00647	6.96258	5.29885	4.6272	4.69123	4.37494	5.21915	6.08174	5.71933	6.00647	6.96258	5.29885	4.6272	4.69123	4.37494	5.21915	-1.35026	5.44239	-4.5161	0.00176099	0.030839	-1.10872	DownReg	NonSwitched	Single-promoter
1113	ENSG00000114541	FRMD4B	chr3	69200509	-	FALSE	2	KC-PB.3034.1	3.62968	7.64251	3.72607	8.56523	Minor	Minor	2.68046	3.71823	3.63373	4.4863	2.85709	3.45209	4.16929	3.70276	4.44913	6.62797	7.98441	8.07668	7.88096	7.65235	8.43383	8.74665	8.77435	9.21894	0.0963907	3.68323	0.226839	0.826007	0.920519	-6.70173	NonSig	NonSwitched	Multi-promoter
1114	ENSG00000114541	FRMD4B	chr3	69542671	-	FALSE	1	KC-PB.3034.2,KC-PB.3034.3,KC-PB.3034.4	4.01283	7.64251	4.83916	8.56523	Major	Major	3.94751	4.26618	4.44295	3.39467	4.79527	4.98174	4.57737	5.0716	4.76981	6.62797	7.98441	8.07668	7.88096	7.65235	8.43383	8.74665	8.77435	9.21894	0.82633	4.4719	3.66774	0.00588478	0.0539953	-2.34791	NonSig	NonSwitched	Multi-promoter
1115	ENSG00000114573	ATP6V1A	chr3	113747035	+	FALSE	1	KC-PB.3070.1,KC-PB.3070.2	6.19266	6.19266	6.37534	6.37534	Major	Major	7.05157	6.14827	5.83353	5.73726	6.42224	6.54778	6.53132	6.14056	6.23479	7.05157	6.14827	5.83353	5.73726	6.42224	6.54778	6.53132	6.14056	6.23479	0.182681	6.29415	0.673773	0.518678	0.708103	-6.48609	NonSig	NonSwitched	Single-promoter
1116	ENSG00000114648	KLHL18	chr3	47282944	+	FALSE	1	KC-PB.2985.1	2.83536	2.83536	3.31857	3.31857	Major	Major	3.76816	3.01687	2.36458	2.19185	4.09253	3.11259	3.24733	2.80951	3.3309	3.76816	3.01687	2.36458	2.19185	4.09253	3.11259	3.24733	2.80951	3.3309	0.483207	3.10381	1.29035	0.231528	0.455245	-5.89303	NonSig	NonSwitched	Single-promoter
1117	ENSG00000114670	NEK11	chr3	131026882	+	FALSE	1	KC-PB.3110.1	0	0	0.931303	0.931303	Inactive	Major	0	0	0	0	0	2.27043	0	0.894243	1.49184	0	0	0	0	0	2.27043	0	0.894243	1.49184	0.931303	0.517391	2.00543	0.0783653	0.239132	-4.92349	NonSig	NonSwitched	Single-promoter
1118	ENSG00000114686	MRPL3	chr3	131502971	-	FALSE	1	KC-PB.3109.1,KC-PB.3109.2	5.85053	5.85053	5.79252	5.79252	Major	Major	5.06452	6.16874	5.13905	7.02979	6.19514	5.64258	6.08026	5.97319	5.07144	5.06452	6.16874	5.13905	7.02979	6.19514	5.64258	6.08026	5.97319	5.07144	-0.0580033	5.8183	-0.131798	0.898266	0.96098	-6.72047	NonSig	NonSwitched	Single-promoter
1119	ENSG00000114742	WDR48	chr3	39051999	+	FALSE	1	KC-PB.2959.1	3.602	3.602	4.27873	4.27873	Major	Major	2.68046	4.47782	2.36458	4.88515	4.01504	4.91014	3.59815	4.91617	3.95417	2.68046	4.47782	2.36458	4.88515	4.01504	4.91014	3.59815	4.91617	3.95417	0.67673	3.97796	1.15261	0.281012	0.505309	-6.05017	NonSig	NonSwitched	Single-promoter
1120	ENSG00000114744	COMMD2	chr3	149752488	-	FALSE	1	KC-PB.3138.1	4.46259	4.46259	5.17092	5.17092	Major	Major	3.32448	5.69131	4.51018	4.3244	5.5113	4.67118	5.58661	4.83169	5.25382	3.32448	5.69131	4.51018	4.3244	5.5113	4.67118	5.58661	4.83169	5.25382	0.708331	4.85611	1.59823	0.147095	0.34492	-5.50226	NonSig	NonSwitched	Single-promoter
1121	ENSG00000114745	GORASP1	chr3	39107638	-	FALSE	1	KC-PB.2961.1,KC-PB.2961.2,KC-PB.2961.3,KC-PB.2961.4	2.66843	2.66843	3.21535	3.21535	Major	Major	3.56331	3.60263	3.5078	0	3.43488	3.45209	3.74602	2.97619	2.46759	3.56331	3.60263	3.5078	0	3.43488	3.45209	3.74602	2.97619	2.46759	0.54692	2.97228	0.721499	0.49032	0.686286	-6.45138	NonSig	NonSwitched	Single-promoter
1122	ENSG00000114850	SSR3	chr3	156555140	-	FALSE	1	KC-PB.3149.1,KC-PB.3149.2,KC-PB.3149.3,KC-PB.3149.4,KC-PB.3149.6,KC-PB.3149.7,KC-PB.3149.5	6.54847	6.54847	7.23969	7.23969	Major	Major	5.58171	6.54261	6.82082	7.24873	7.22882	7.30904	7.29642	7.15659	7.2076	5.58171	6.54261	6.82082	7.24873	7.22882	7.30904	7.29642	7.15659	7.2076	0.691224	6.93248	2.3025	0.0489761	0.185244	-4.47331	NonSig	NonSwitched	Single-promoter
1123	ENSG00000114861	FOXP1	chr3	71064937	-	FALSE	2	KC-PB.3036.1	1.75013	5.79939	3.38614	6.70768	Minor	Major	3.03811	1.59783	2.36458	0	3.54925	2.66779	3.43338	3.60434	3.67594	7.41932	4.42171	6.41443	4.94209	5.74108	6.30865	7.75189	6.72994	7.00683	1.63601	2.65902	2.88712	0.0194116	0.108503	-3.55874	NonSig	NonSwitched	Multi-promoter
1124	ENSG00000114861	FOXP1	chr3	71583722	-	FALSE	1	KC-PB.3038.1	4.04926	5.79939	3.32154	6.70768	Major	Minor	4.38121	2.82388	4.04986	4.94209	2.19183	3.64086	4.31851	3.1256	3.3309	7.41932	4.42171	6.41443	4.94209	5.74108	6.30865	7.75189	6.72994	7.00683	-0.727718	3.64497	-1.40496	0.196143	0.409207	-5.75343	NonSig	NonSwitched	Multi-promoter
1125	ENSG00000114867	EIF4G1	chr3	184314559	+	FALSE	1	KC-PB.3181.1,KC-PB.3181.3,KC-PB.3181.4,KC-PB.3181.5,KC-PB.3181.6,KC-PB.3181.7	4.75154	24.1244	5.63598	23.4394	Minor	Minor	5.14026	5.18865	4.63591	4.04136	6.31315	5.90449	4.86306	5.45719	5.64203	25.3172	24.1097	23.5683	23.5022	23.9199	23.766	23.3795	22.6152	23.5166	0.88444	5.2429	2.58198	0.0314198	0.143503	-4.03839	NonSig	NonSwitched	Multi-promoter
1126	ENSG00000114867	EIF4G1	chr3	184317736	+	TRUE	2	KC-PB.3181.9	9.69012	24.1244	9.04941	23.4394	NA	NA	10.0371	9.54866	9.58248	9.59225	8.92854	9.14928	9.30749	8.81124	9.05051	25.3172	24.1097	23.5683	23.5022	23.9199	23.766	23.3795	22.6152	23.5166	-0.640705	9.33417	-4.04348	0.00340501	0.0416417	-1.78687	NonSig	NonSwitched	Multi-promoter
1127	ENSG00000114867	EIF4G1	chr3	184319718	+	TRUE	3	KC-PB.3181.10	9.68269	24.1244	8.75405	23.4394	NA	NA	10.1398	9.37238	9.34995	9.86862	8.67819	8.71225	9.20897	8.3468	8.82404	25.3172	24.1097	23.5683	23.5022	23.9199	23.766	23.3795	22.6152	23.5166	-0.928642	9.16678	-4.01547	0.00354433	0.0416417	-1.82806	NonSig	NonSwitched	Multi-promoter
1128	ENSG00000114904	NEK4	chr3	52770934	-	FALSE	1	KC-PB.3010.1,KC-PB.3010.2,KC-PB.3010.3	3.35783	3.35783	3.73836	3.73836	Major	Major	3.32448	2.60103	3.95653	3.54927	3.75393	3.72672	4.22076	4.11387	2.8765	3.32448	2.60103	3.95653	3.54927	3.75393	3.72672	4.22076	4.11387	2.8765	0.380529	3.56923	1.09445	0.304336	0.528021	-6.11271	NonSig	NonSwitched	Single-promoter
1129	ENSG00000114923	SLC4A3	chr2	219627612	+	FALSE	1	KC-PB.2627.1	0	0	0	0	Inactive	Inactive	0	0	0	0	0	0	0	0	0	0	0	0	0	0	0	0	0	0	0	0	0	1	1	-6.73005	NonSig	NonSwitched	Single-promoter
1130	ENSG00000114978	MOB1A	chr2	74178879	-	FALSE	1	KC-PB.2433.1,KC-PB.2433.2,KC-PB.2433.3,KC-PB.2433.4,KC-PB.2433.5,KC-PB.2433.6	6.77548	6.77548	6.65676	6.65676	Major	Major	6.79462	6.6915	6.86001	6.75579	6.61841	6.7561	6.59122	6.85869	6.45941	6.79462	6.6915	6.86001	6.75579	6.61841	6.7561	6.59122	6.85869	6.45941	-0.118714	6.70953	-0.990354	0.349842	0.569274	-6.2185	NonSig	NonSwitched	Single-promoter
1131	ENSG00000114982	KANSL3	chr2	96638363	-	FALSE	1	KC-PB.2459.1	1.19871	1.19871	1.70973	1.70973	Major	Major	3.03811	0	0	1.75672	1.87839	2.66779	1.85366	2.14878	0	3.03811	0	0	1.75672	1.87839	2.66779	1.85366	2.14878	0	0.511019	1.48261	0.669419	0.521314	0.710883	-6.48915	NonSig	NonSwitched	Single-promoter
1132	ENSG00000114993	RTKN	chr2	74441898	-	FALSE	1	KC-PB.2435.1	5.16656	5.16656	4.67448	4.67448	Major	Major	4.89998	5.01866	5.18091	5.56669	4.59679	4.6272	4.79676	4.78752	4.56413	4.89998	5.01866	5.18091	5.56669	4.59679	4.6272	4.79676	4.78752	4.56413	-0.492081	4.89318	-3.13269	0.0132408	0.087819	-3.17337	NonSig	NonSwitched	Single-promoter
1133	ENSG00000115053	NCL	chr2	231464484	-	FALSE	1	KC-PB.2642.1	8.27419	8.27419	9.42338	9.42338	Major	Major	7.74024	8.9965	8.15622	8.20379	9.52217	9.28461	9.50986	9.32926	9.47102	7.74024	8.9965	8.15622	8.20379	9.52217	9.28461	9.50986	9.32926	9.47102	1.1492	8.91263	4.8776	0.00108722	0.0227357	-0.612492	UpReg	NonSwitched	Single-promoter
1134	ENSG00000115084	SLC35F5	chr2	113756652	-	FALSE	1	KC-PB.2492.1,KC-PB.2492.2	5.78176	5.78176	5.14618	5.14618	Major	Major	6.29558	5.71933	4.69489	6.41725	5.12533	5.20758	5.18155	4.83169	5.38476	6.29558	5.71933	4.69489	6.41725	5.12533	5.20758	5.18155	4.83169	5.38476	-0.635581	5.42866	-1.85789	0.0987204	0.273175	-5.13955	NonSig	NonSwitched	Single-promoter
1135	ENSG00000115091	ACTR3	chr2	113890063	+	FALSE	1	KC-PB.2487.1,KC-PB.2487.2,KC-PB.2487.3,KC-PB.2487.4	8.15473	8.15473	7.78483	7.78483	Major	Major	8.19561	8.39424	8.05854	7.97053	7.66912	8.01133	7.9198	7.59495	7.72896	8.19561	8.39424	8.05854	7.97053	7.66912	8.01133	7.9198	7.59495	7.72896	-0.3699	7.94923	-2.58253	0.0313924	0.143503	-4.03753	NonSig	NonSwitched	Single-promoter
1136	ENSG00000115107	STEAP3	chr2	119223834	+	FALSE	1	KC-PB.2489.1	0.256701	0.256701	1.17676	1.17676	Major	Major	0	0	1.0268	0	2.19183	0	1.85366	1.83831	0	0	0	1.0268	0	2.19183	0	1.85366	1.83831	0	0.92006	0.767845	1.66803	0.132299	0.324584	-5.40731	NonSig	NonSwitched	Single-promoter
1137	ENSG00000115109	EPB41L5	chr2	120013051	+	FALSE	1	KC-PB.2490.1	3.79353	3.79353	3.6193	3.6193	Major	Major	1.48725	5.06307	4.13751	4.4863	4.36658	4.15612	3.43338	2.80951	3.3309	1.48725	5.06307	4.13751	4.4863	4.36658	4.15612	3.43338	2.80951	3.3309	-0.174236	3.69673	-0.245983	0.811638	0.912292	-6.69676	NonSig	NonSwitched	Single-promoter
1138	ENSG00000115145	STAM2	chr2	152175762	-	FALSE	1	KC-PB.2516.1	4.39655	4.39655	4.33528	4.33528	Major	Major	4.71422	4.77344	3.95653	4.142	4.16608	4.02669	4.45374	4.91617	4.11372	4.71422	4.77344	3.95653	4.142	4.16608	4.02669	4.45374	4.91617	4.11372	-0.0612686	4.36251	-0.242697	0.814099	0.91326	-6.69764	NonSig	NonSwitched	Single-promoter
1139	ENSG00000115159	GPD2	chr2	156436381	+	FALSE	1	KC-PB.2522.1,KC-PB.2522.2,KC-PB.2522.3	4.79179	4.79179	4.43898	4.43898	Major	Major	4.25061	5.30417	5.05149	4.56091	4.74815	3.95734	4.16929	4.99598	4.32416	4.25061	5.30417	5.05149	4.56091	4.74815	3.95734	4.16929	4.99598	4.32416	-0.352812	4.59579	-1.21803	0.256524	0.478654	-5.97707	NonSig	NonSwitched	Single-promoter
1140	ENSG00000115183	TANC1	chr2	158968638	+	FALSE	1	KC-PB.2524.1	2.44682	2.44682	3.21883	3.21883	Major	Major	0	2.33736	3.63373	3.81619	3.43488	2.97901	2.7828	3.70276	3.19474	0	2.33736	3.63373	3.81619	3.43488	2.97901	2.7828	3.70276	3.19474	0.772015	2.87572	1.05305	0.32185	0.545365	-6.15575	NonSig	NonSwitched	Single-promoter
1141	ENSG00000115207	GTF3C2	chr2	27356764	-	FALSE	1	KC-PB.2351.1	1.70652	1.70652	2.05801	2.05801	Major	Major	1.48725	3.71823	1.62059	0	2.19183	2.66779	2.09346	1.44216	1.8948	1.48725	3.71823	1.62059	0	2.19183	2.66779	2.09346	1.44216	1.8948	0.351492	1.90179	0.536262	0.605773	0.77885	-6.57399	NonSig	NonSwitched	Single-promoter
1142	ENSG00000115221	ITGB6	chr2	160200283	-	FALSE	1	KC-PB.2529.1	0.800379	0.800379	3.53443	3.53443	Major	Major	0	1.00966	0	2.19185	4.54259	3.23485	3.81464	2.40413	3.67594	0	1.00966	0	2.19185	4.54259	3.23485	3.81464	2.40413	3.67594	2.73405	2.3193	4.84756	0.00113086	0.0232382	-0.652969	UpReg	NonSwitched	Single-promoter
1143	ENSG00000115232	ITGA4	chr2	181457387	+	FALSE	1	KC-PB.2560.1	1.53277	1.53277	0.90686	0.90686	Major	Major	1.48725	2.01447	2.62936	0	0	0.819616	1.5659	2.14878	0	1.48725	2.01447	2.62936	0	0	0.819616	1.5659	2.14878	0	-0.62591	1.18504	-0.979615	0.354817	0.573612	-6.22895	NonSig	NonSwitched	Single-promoter
1144	ENSG00000115239	ASB3	chr2	53786953	-	FALSE	1	KC-PB.2394.1	3.05625	3.05625	2.13018	2.13018	Major	Major	3.03811	4.01806	1.0268	4.142	0.920075	3.11259	2.09346	1.83831	2.68648	3.03811	4.01806	1.0268	4.142	0.920075	3.11259	2.09346	1.83831	2.68648	-0.926061	2.54177	-1.31452	0.223646	0.444666	-5.86423	NonSig	NonSwitched	Single-promoter
1145	ENSG00000115275	MOGS	chr2	74465398	-	TRUE	1	KC-PB.2438.1,KC-PB.2438.2	4.2332	4.2332	4.54406	4.54406	NA	NA	4.50096	4.01806	4.37244	4.04136	4.36658	4.67118	4.69123	3.88148	5.10981	4.50096	4.01806	4.37244	4.04136	4.36658	4.67118	4.69123	3.88148	5.10981	0.310852	4.4059	1.24363	0.247434	0.469173	-5.9477	NonSig	NonSwitched	Single-promoter
1146	ENSG00000115282	TTC31	chr2	74483084	+	FALSE	1	KC-PB.2437.1	2.81481	2.81481	3.30465	3.30465	Major	Major	3.56331	4.18812	3.5078	0	3.54925	2.66779	3.14445	3.1256	4.03615	3.56331	4.18812	3.5078	0	3.54925	2.66779	3.14445	3.1256	4.03615	0.489842	3.08694	0.607349	0.559778	0.741157	-6.53083	NonSig	NonSwitched	Single-promoter
1147	ENSG00000115295	CLIP4	chr2	29115528	+	FALSE	1	KC-PB.2356.1	3.82678	3.82678	3.3333	3.3333	Major	Major	3.56331	3.47695	3.21724	5.04964	2.44918	4.15612	3.51811	3.49871	3.04437	3.56331	3.47695	3.21724	5.04964	2.44918	4.15612	3.51811	3.49871	3.04437	-0.493484	3.55263	-1.08755	0.307202	0.531437	-6.11997	NonSig	NonSwitched	Single-promoter
1148	ENSG00000115306	SPTBN1	chr2	54558362	+	FALSE	1	KC-PB.2397.1,KC-PB.2397.2	6.1668	6.1668	6.74207	6.74207	Major	Major	5.87561	6.92599	6.16089	5.70472	6.69494	6.60558	6.78321	6.51028	7.11632	5.87561	6.92599	6.16089	5.70472	6.69494	6.60558	6.78321	6.51028	7.11632	0.575265	6.48639	2.21832	0.0559782	0.202238	-4.60252	NonSig	NonSwitched	Single-promoter
1149	ENSG00000115310	RTN4	chr2	55050500	-	FALSE	1	KC-PB.2398.3,KC-PB.2398.1,KC-PB.2398.2	10.1433	10.1433	8.98401	8.98401	Major	Major	10.3011	10.2054	9.91725	10.1496	8.89648	8.94949	9.34712	8.755	8.97197	10.3011	10.2054	9.91725	10.1496	8.89648	8.94949	9.34712	8.755	8.97197	-1.15933	9.49927	-7.6194	4.93116e-05	0.00486952	2.52757	DownReg	NonSwitched	Single-promoter
1150	ENSG00000115339	GALNT3	chr2	165794839	-	FALSE	1	KC-PB.2533.1,KC-PB.2533.3,KC-PB.2533.2,KC-PB.2533.5	3.33838	3.33838	4.1468	4.1468	Major	Major	3.56331	2.01447	3.63373	4.142	3.75393	4.3308	4.22076	4.04049	4.38799	3.56331	2.01447	3.63373	4.142	3.75393	4.3308	4.22076	4.04049	4.38799	0.808419	3.7875	2.02505	0.0759835	0.235843	-4.89433	NonSig	NonSwitched	Single-promoter
1151	ENSG00000115355	CCDC88A	chr2	55419839	-	FALSE	1	KC-PB.2399.1	3.25704	3.25704	4.25687	4.25687	Major	Major	4.107	3.47695	5.44419	0	4.16608	4.53501	4.31851	4.6949	3.56983	4.107	3.47695	5.44419	0	4.16608	4.53501	4.31851	4.6949	3.56983	0.999829	3.8125	1.0421	0.32661	0.548982	-6.16692	NonSig	NonSwitched	Single-promoter
1152	ENSG00000115365	LANCL1	chr2	210476719	-	TRUE	3	KC-PB.2610.1,KC-PB.2610.2	5.65797	10.2498	5.98522	11.4602	NA	NA	5.28074	6.37658	5.33718	5.63736	6.02767	5.99378	5.96423	5.99278	5.94761	9.22825	11.0389	9.08672	11.6454	12.0476	12.2909	12.2012	11.6186	9.14235	0.32725	5.83977	1.46772	0.178827	0.386116	-5.6739	NonSig	NonSwitched	Multi-promoter
1153	ENSG00000115365	LANCL1	chr2	210476757	-	FALSE	2	KC-PB.2610.4,KC-PB.2610.5	4.0439	10.2498	3.90917	11.4602	Minor	Minor	3.94751	4.66235	3.74954	3.81619	4.54259	4.02669	3.59815	4.1837	3.19474	9.22825	11.0389	9.08672	11.6454	12.0476	12.2909	12.2012	11.6186	9.14235	-0.134725	3.96905	-0.434391	0.675017	0.831354	-6.62705	NonSig	NonSwitched	Multi-promoter
1154	ENSG00000115365	LANCL1	chr2	210477582	-	FALSE	1	KC-PB.2610.3	0.547963	10.2498	1.56576	11.4602	Minor	Minor	0	0	0	2.19185	1.47738	2.27043	2.63885	1.44216	0	9.22825	11.0389	9.08672	11.6454	12.0476	12.2909	12.2012	11.6186	9.14235	1.0178	1.11341	1.56124	0.155531	0.356258	-5.55172	NonSig	NonSwitched	Multi-promoter
1155	ENSG00000115368	WDR75	chr2	189441474	+	FALSE	1	KC-PB.2568.1	3.74754	3.74754	4.4565	4.4565	Major	Major	3.56331	4.66235	3.36982	3.39467	4.54259	4.4866	3.81464	4.87455	4.56413	3.56331	4.66235	3.36982	3.39467	4.54259	4.4866	3.81464	4.87455	4.56413	0.708963	4.14141	2.21452	0.0563167	0.202707	-4.60833	NonSig	NonSwitched	Single-promoter
1156	ENSG00000115414	FN1	chr2	215386868	-	TRUE	3	KC-PB.2612.6	4.99589	15.4101	5.71905	17.8515	NA	NA	6.00279	3.92487	4.85861	5.19728	6.26375	6.15733	5.7532	4.91617	5.5048	18.7228	12.5197	15.9077	14.4901	19.1727	20.0671	17.1395	15.2282	17.6501	0.72316	5.39764	1.65129	0.135717	0.329559	-5.43027	NonSig	NonSwitched	Multi-promoter
1157	ENSG00000115414	FN1	chr2	215388289	-	TRUE	2	KC-PB.2612.5	5.45392	15.4101	6.60291	17.8515	NA	NA	6.39168	4.87658	6.13981	4.40762	7.02648	7.49793	6.36969	5.61717	6.50331	18.7228	12.5197	15.9077	14.4901	19.1727	20.0671	17.1395	15.2282	17.6501	1.14899	6.09225	2.22392	0.0554833	0.200654	-4.59396	NonSig	NonSwitched	Multi-promoter
1158	ENSG00000115414	FN1	chr2	215436068	-	FALSE	1	KC-PB.2612.2,KC-PB.2612.3,KC-PB.2612.4,KC-PB.2612.10,KC-PB.2612.11,KC-PB.2612.12,KC-PB.2612.7,KC-PB.2612.8,KC-PB.2612.9,KC-PB.2612.13	4.96025	15.4101	5.52957	17.8515	Minor	Minor	6.32833	3.71823	4.9093	4.88515	5.88249	6.41182	5.01658	4.6949	5.64203	18.7228	12.5197	15.9077	14.4901	19.1727	20.0671	17.1395	15.2282	17.6501	0.569313	5.27654	1.04983	0.323242	0.546541	-6.15904	NonSig	NonSwitched	Multi-promoter
1159	ENSG00000115415	STAT1	chr2	191014200	-	FALSE	1	KC-PB.2573.1,KC-PB.2573.2,KC-PB.2573.3	5.78377	5.78377	6.24417	6.24417	Major	Major	6.22776	4.87658	6.02957	6.00115	6.40715	5.84813	6.82539	5.87107	6.2691	6.22776	4.87658	6.02957	6.00115	6.40715	5.84813	6.82539	5.87107	6.2691	0.460404	6.03955	1.42169	0.19139	0.402837	-5.73243	NonSig	NonSwitched	Single-promoter
[truncated: 2,396 more rows]

## Sheet: Table S10.2
Table S10.2 Functional enrichment of Multi-Promoter genes in KCs (related to Figure 5C)
State	ID	Description	GeneRatio	BgRatio	pvalue	p.adjust	qvalue	geneID	Count
[truncated: 59 more rows]

## Sheet: Table S10.3
Table S10.3 GO terms for shifted promoter genes in KCs (related Figure 5P)
[truncated: 29 more rows]

## Sheet: Table S10.4
Table S10.4 Motifs enriched in UpReg promoters in KCs (related to Figure 5Q)
[truncated: 441 more rows]
