# Supplementary material
Source: Research Square preprint supplement (doi:10.21203/rs.3.rs-9917999/v1)
Supplement: Supplementary file 2 [file 014f50a0d80651fce0505037.xlsx]

## Sheet: Table S11.1
Table S11.1 Differential PAS usage in FB-prolif (W7 vs skin) (related to Figure 6F)
Genes	logFC	AveExpr	t	P.Value	adj.P.Val	B	Color
TPM4	8.80064	1.30555	4.817	0.00119109	0.0144453	-0.603601	Red
DNAJC21	7.51315	-3.84016	10.2463	5.34018e-06	0.00399789	4.57056	Red
C6orf89	7.057	-2.53373	3.98805	0.00371768	0.0196565	-1.75339	Red
THY1	6.94836	-2.44089	4.13981	0.00299582	0.0180545	-1.53516	Red
PTOV1	6.64021	-2.4705	6.21785	0.00021721	0.0112904	1.09609	Red
SERPINB8	6.45043	-6.08354	5.97101	0.000287649	0.0116642	0.818324	Red
MRPL42	6.29774	-2.91335	2.81563	0.0218077	0.0478542	-3.52839	Red
METAP2	6.29486	-2.03802	3.6117	0.00644022	0.0237698	-2.30815	Red
WDR1	6.17964	-2.96379	3.96782	0.00382719	0.0196565	-1.78273	Red
DYNC1LI2	6.03293	-2.01017	4.25889	0.00253488	0.017233	-1.36625	Red
ERLEC1	5.91346	-3.77999	5.51756	0.000491886	0.0123071	0.284291	Red
EEF1E1	5.91236	-3.32639	4.76935	0.00126817	0.0146507	-0.666816	Red
LMAN2	5.90636	-3.45942	7.0946	8.49619e-05	0.00883249	2.01311	Red
SRA1	5.87966	-0.600035	7.69929	4.66979e-05	0.00674185	2.58696	Red
ENSG00000289694	5.81755	0.0672204	1.50925	0.168273	0.226894	-5.45771	Gray
TOPBP1	5.79733	-3.485	4.44281	0.00196639	0.0158263	-1.10959	Red
MRPL43	5.76577	-0.574885	2.0456	0.0737026	0.116071	-4.70772	Gray
TCF4	5.74765	-3.8365	5.58544	0.000453136	0.0122889	0.366231	Red
SET	5.642	-0.4467	2.75185	0.0241085	0.050846	-3.6275	Red
HTT	5.63446	-4.37407	6.74708	0.00012196	0.0104876	1.6622	Red
TPGS2	5.61481	-2.65282	3.18837	0.0122156	0.0331261	-2.95142	Red
ARPC5L	5.61064	-1.97356	3.79502	0.00491584	0.0214423	-2.03562	Red
MXD4	5.57092	-5.55813	6.6254	0.000138862	0.0104876	1.53549	Red
KHDRBS1	5.46761	-3.15782	4.3818	0.00213803	0.016116	-1.19415	Red
CCDC71L	5.41929	-4.64927	9.42642	1.01626e-05	0.00399789	3.99994	Red
CANX	5.34729	-2.81856	4.46929	0.00189658	0.0155035	-1.07307	Red
SPDL1	5.33788	-4.15643	5.32367	0.000623974	0.0123071	0.0462794	Red
C19orf25	5.33276	-2.19357	2.94543	0.0177976	0.0419706	-3.32687	Red
SNX6	5.2911	-1.25665	3.06432	0.0147932	0.0375473	-3.14274	Red
YWHAQ	5.2487	-3.51565	4.89552	0.00107495	0.0141953	-0.500232	Red
ENAH	5.24521	-4.37659	4.63292	0.00152034	0.0148604	-0.849772	Red
TOMM5	5.23637	0.339405	2.38832	0.0428524	0.076808	-4.18994	Red
BZW2	5.22224	-3.6646	4.72382	0.00134689	0.0147608	-0.727545	Red
MRPL44	5.20859	-5.56638	9.05058	1.387e-05	0.00399789	3.71828	Red
HRH1	5.16146	-4.2371	5.72901	0.000381719	0.0116642	0.537208	Red
NECTIN2	5.15139	-2.01171	4.23554	0.00261888	0.017499	-1.39921	Red
GCDH	5.14972	-3.56135	3.37917	0.00912943	0.0281952	-2.65937	Red
EIF5B	5.13259	-0.552744	1.42335	0.19107	0.250773	-5.56704	Gray
WWTR1	5.11883	-4.85997	10.1297	5.836e-06	0.00399789	4.49285	Red
ENSG00000285897	5.06947	-3.897	6.68751	0.000129934	0.0104876	1.60042	Red
MRPS5	5.04573	-2.44292	2.17085	0.0604857	0.0998755	-4.52075	Gray
CAST	4.99938	-2.51886	2.90963	0.0188209	0.0434881	-3.38241	Red
THRAP3	4.99861	-3.88362	3.87069	0.0044032	0.0205618	-1.92439	Red
UGDH	4.90826	-2.35542	2.06007	0.0720425	0.114342	-4.68628	Gray
NPM1	4.79233	0.0502044	4.97441	0.000970526	0.014154	-0.397349	Red
GNA12	4.77598	-4.38678	4.98682	0.000955124	0.014154	-0.381252	Red
BCL2	4.68678	-8.49103	4.60023	0.0015885	0.0148604	-0.894045	Red
KCMF1	4.6752	-2.64862	3.16688	0.012626	0.0337393	-2.98449	Red
SPRYD7	4.65916	-2.66001	2.83934	0.0210111	0.0465565	-3.49156	Red
RAD23B	4.64329	-4.97272	5.86018	0.000327134	0.0116642	0.690679	Red
SMC4	4.63096	-3.64347	4.55288	0.00169316	0.0149803	-0.958474	Red
UFSP2	4.63034	-4.14079	3.76813	0.00511308	0.0217209	-2.07534	Red
TMA16	4.62138	-3.76659	4.1718	0.00286374	0.0176857	-1.48957	Red
EEF2KMT	4.58223	-4.22206	8.47793	2.27582e-05	0.00473182	3.26261	Red
UBE2J1	4.56931	-2.83894	3.87284	0.00438948	0.0205474	-1.92124	Red
ATP2B4	4.56439	-4.13897	2.47739	0.0372067	0.0693339	-4.05286	Red
TCEA2	4.51253	-4.42419	3.96119	0.00386383	0.0196565	-1.79236	Red
POLR3D	4.47696	-2.31408	2.29104	0.0500018	0.0865149	-4.33873	Gray
MRPL2	4.43926	-4.43885	4.04156	0.00344392	0.0192353	-1.67607	Red
WTIP	4.42327	-4.24805	5.89822	0.000312949	0.0116642	0.734698	Red
IL6ST	4.37663	-1.85	1.88456	0.0948493	0.142362	-4.94282	Gray
LRRFIP1	4.36807	-1.73779	3.24831	0.0111428	0.0314138	-2.85936	Red
MXRA7	4.35991	-4.86482	5.85535	0.000328986	0.0116642	0.68507	Red
MRPS16	4.3559	-0.171911	2.87268	0.0199412	0.0451482	-3.43977	Red
MMP24OS	4.33305	-5.02586	9.73313	7.9454e-06	0.00399789	4.22019	Red
EIF2AK2	4.31128	-4.07432	3.98779	0.00371908	0.0196565	-1.75377	Red
AK4	4.27323	-4.33564	3.20391	0.0119275	0.0326914	-2.92753	Red
G3BP2	4.24603	-3.73622	6.41375	0.000174746	0.0106748	1.31023	Red
TOMM22	4.23258	-5.00216	5.01052	0.000926449	0.014154	-0.350584	Red
CAMTA1	4.21731	-2.5612	6.22224	0.000216145	0.0112904	1.10094	Red
HCCS	4.1938	-1.03081	1.32575	0.220202	0.28349	-5.68655	Gray
MACO1	4.19246	-3.18569	3.70054	0.00564685	0.0225846	-2.17556	Red
DNAJC10	4.18433	-4.1795	3.25239	0.0110733	0.0312763	-2.85309	Red
YARS1	4.18072	-5.09734	6.38487	0.000180389	0.0106748	1.279	Red
ENSG00000264058	4.1623	-4.14093	3.89424	0.00425554	0.0202239	-1.88993	Red
CCBE1	4.15233	-4.57978	5.86073	0.000326924	0.0116642	0.691316	Red
SMIM10L1	4.1501	-2.80304	3.67744	0.00584259	0.0228126	-2.20994	Red
POLR1D	4.08717	-2.03629	2.18918	0.0587569	0.0975373	-4.49314	Gray
TMED7-TICAM2	4.08086	-4.77195	6.25883	0.000207468	0.0112529	1.14133	Red
APTX	4.07391	-3.69738	2.80998	0.0220022	0.0481507	-3.53718	Red
FKBP14	4.05569	-3.79783	2.41715	0.0409366	0.0739585	-4.14564	Red
TMX1	4.04072	-2.24267	2.48523	0.0367473	0.0690518	-4.04076	Red
CTSC	4.03245	-4.1122	8.79518	1.7241e-05	0.00399789	3.51913	Red
ZEB2	4.03154	-5.30211	3.78904	0.004959	0.0214432	-2.04445	Red
LARGE1	4.01291	-3.50502	1.60476	0.145801	0.201313	-5.33201	Gray
BEND6	3.99633	-4.63041	3.39778	0.00887581	0.0278555	-2.63105	Red
INSIG1	3.96799	-4.83701	8.9017	1.57356e-05	0.00399789	3.60297	Red
ENSG00000288725	3.96613	-4.04507	3.3648	0.00933048	0.0284244	-2.68125	Red
TMEM107	3.96234	-4.12035	4.1894	0.00279374	0.0175973	-1.46455	Red
TTBK2	3.94468	-5.42545	8.93095	1.53481e-05	0.00399789	3.6258	Red
SIRT3	3.92327	-6.7762	7.37094	6.43314e-05	0.00764318	2.28098	Red
WDR43	3.92192	-3.70986	4.96995	0.000976127	0.014154	-0.40314	Red
TAF15	3.91975	-2.52282	1.75886	0.11524	0.167554	-5.12111	Gray
GORASP2	3.91695	-4.17747	4.85182	0.00113799	0.0142877	-0.557644	Red
TMEM8B	3.90102	-5.6979	3.71964	0.00549023	0.0222734	-2.14718	Red
ING1	3.90099	-3.90553	3.64754	0.00610676	0.0232262	-2.25454	Red
BHLHE40	3.90056	-4.90807	4.42853	0.00200518	0.0159597	-1.12933	Red
SYS1	3.88762	-4.88708	7.97699	3.59087e-05	0.00619908	2.83575	Red
ENSG00000291185	3.85761	-5.88912	3.78555	0.00498438	0.0214983	-2.0496	Red
MID1	3.85731	-4.56944	6.62562	0.000138828	0.0104876	1.53573	Red
ZNF292	3.84616	-4.37342	2.90352	0.0190017	0.0438162	-3.3919	Red
HEMK1	3.84362	-4.67392	3.525	0.00732913	0.0252921	-2.43842	Red
CAPRIN1	3.82845	-3.51102	5.92255	0.000304233	0.0116642	0.762734	Red
BICD2	3.81687	-4.44967	4.8593	0.00112691	0.0142877	-0.547785	Red
KIF3A	3.80627	-4.22714	4.21356	0.00270069	0.0175419	-1.4303	Red
ESYT2	3.79142	-2.28048	2.25585	0.0528702	0.0899803	-4.39225	Gray
NADSYN1	3.78607	-5.95699	2.47687	0.0372375	0.0693339	-4.05366	Red
RBM25	3.77612	-1.36018	8.17901	2.97956e-05	0.00571847	3.01121	Red
PRXL2C	3.77343	-5.06656	2.84734	0.0207492	0.0462987	-3.47914	Red
SLC38A2	3.77034	-3.10256	1.91372	0.0906322	0.136865	-4.90076	Gray
AGO1	3.75719	-6.05645	3.87576	0.00437096	0.0205182	-1.91697	Red
MDM1	3.74718	-5.89577	2.59724	0.0307729	0.0609353	-3.86749	Red
SRSF11	3.73263	-3.50109	3.7935	0.00492678	0.0214432	-2.03787	Red
HK1	3.72306	-4.85774	5.91322	0.000307544	0.0116642	0.751991	Red
FAM89A	3.70544	-3.44329	1.94768	0.0859464	0.130834	-4.85147	Gray
GALK2	3.6936	-4.30971	5.7437	0.000375136	0.0116642	0.554526	Red
MOSPD1	3.67787	-5.18825	3.53274	0.0072447	0.0251049	-2.42675	Red
CACUL1	3.66843	-3.95775	3.34764	0.00957669	0.0288922	-2.70741	Red
CBX6	3.65894	-6.47547	4.58051	0.00163122	0.0148604	-0.920839	Red
TOLLIP	3.65223	-3.26428	4.38629	0.00212486	0.0160744	-1.18791	Red
GRSF1	3.62656	-3.7321	4.36567	0.00218606	0.0161975	-1.21661	Red
TMEM9B	3.60881	-4.83652	4.95887	0.000990188	0.014154	-0.417535	Red
SOD2	3.60266	-4.04721	3.58468	0.00670434	0.0242074	-2.34866	Red
ZNF195	3.58884	-4.84522	6.46001	0.000166108	0.0106748	1.36	Red
KLHL5	3.58495	-6.71421	9.23735	1.1868e-05	0.00399789	3.8599	Red
SLC25A37	3.56944	-5.267	5.68841	0.000400579	0.0116642	0.489173	Red
KLHL18	3.56353	-4.7828	7.38225	6.36138e-05	0.00764318	2.29174	Red
RGS2	3.56051	-5.0423	2.61988	0.0296903	0.0590728	-3.83238	Red
GABPB1-IT1	3.54448	-5.10349	5.26725	0.000669343	0.0123071	-0.0240784	Red
AIG1	3.53977	-5.13489	3.53496	0.00722072	0.0250566	-2.42341	Red
UHMK1	3.52937	-5.27737	3.55796	0.00697677	0.0245809	-2.38879	Red
SEMA5A	3.52809	-6.16872	5.15484	0.000770836	0.0130832	-0.165758	Red
INTS2	3.51792	-5.25415	3.82411	0.0047116	0.021181	-1.99277	Red
STAT1	3.5175	-4.7842	4.14808	0.00296104	0.0179752	-1.52335	Red
ETV5	3.508	-4.84931	4.0411	0.00344616	0.0192353	-1.67673	Red
MIR193BHG	3.50042	-4.93484	4.30234	0.00238621	0.0169201	-1.30515	Red
NBR1	3.48778	-5.15773	4.3874	0.00212164	0.0160744	-1.18638	Red
RPL7L1	3.48167	-3.34349	2.56954	0.0321524	0.0628684	-3.91041	Red
GPR107	3.47426	-4.92418	4.00084	0.0036502	0.0195253	-1.73487	Red
SELENOF	3.46121	-2.68882	1.60624	0.145475	0.201025	-5.33003	Gray
SNX7	3.45874	-4.6067	3.77881	0.00503377	0.0215425	-2.05956	Red
B4GALT5	3.44363	-3.70352	2.87419	0.0198941	0.0451234	-3.43743	Red
TM9SF3	3.43714	-3.8786	3.46123	0.0080654	0.0265828	-2.53477	Red
ATRIP	3.43538	-7.15326	8.94012	1.52288e-05	0.00399789	3.63294	Red
PLXDC2	3.43378	-3.88015	4.95217	0.0009988	0.014154	-0.426251	Red
SPRED1	3.41781	-4.78044	4.3601	0.00220292	0.0162133	-1.22437	Red
TFPI2	3.40787	-5.57319	5.58768	0.000451916	0.0122889	0.368922	Red
MPDZ	3.38561	-6.29414	3.41643	0.00862899	0.0275311	-2.6027	Red
MIR503HG	3.37066	-4.90949	6.77676	0.000118191	0.0104876	1.69279	Red
ZFPL1	3.36346	-5.62958	4.3609	0.00220049	0.0162133	-1.22326	Red
PNPT1	3.36081	-4.34898	3.35386	0.00948664	0.0286899	-2.69792	Red
SINHCAF	3.36068	-4.45554	2.88732	0.0194895	0.0445703	-3.41705	Red
LTO1	3.35977	-5.81225	4.42534	0.00201396	0.0159597	-1.13374	Red
AHCTF1	3.35736	-3.99459	2.50662	0.035522	0.0679107	-4.00773	Red
ACSL3	3.3513	-5.14312	5.4198	0.000554203	0.0123071	0.165017	Red
MFF	3.34982	-5.4496	7.65245	4.88494e-05	0.00674185	2.54411	Red
TP53BP1	3.34945	-5.79802	5.32817	0.000620501	0.0123071	0.0518723	Red
DNM1L	3.34549	-4.88832	2.48654	0.0366711	0.0690518	-4.03874	Red
ARSA	3.345	-4.35026	2.85153	0.0206132	0.0460651	-3.47262	Red
TMEM167A	3.32335	-6.88604	4.88066	0.00109594	0.0141953	-0.519709	Red
AFF4	3.32136	-5.78094	5.918	0.000305841	0.0116642	0.7575	Red
GRK3	3.31908	-5.60406	4.17412	0.0028544	0.0176718	-1.48627	Red
TDRP	3.31869	-5.59193	2.96062	0.0173809	0.0413545	-3.30332	Red
ZNF793	3.31652	-5.46818	4.71207	0.00136805	0.0147608	-0.743268	Red
KDM4C	3.30724	-5.37205	4.27988	0.00246187	0.0171498	-1.33671	Red
AGPAT4	3.2902	-3.6767	1.65516	0.135071	0.189434	-5.26406	Gray
HEATR6	3.28864	-5.2671	4.56837	0.00165813	0.0149332	-0.937362	Red
AK2	3.28098	0.44415	1.51297	0.167345	0.226056	-5.4529	Gray
PTPRA	3.26548	-4.38148	2.4337	0.0398762	0.0726743	-4.12019	Red
VPS36	3.26159	-4.11684	4.67946	0.0014287	0.0148473	-0.787033	Red
BDP1	3.2609	-2.41081	2.76346	0.0236718	0.0501368	-3.60945	Red
PRELP	3.2501	-4.67723	3.88249	0.00432852	0.0204539	-1.90711	Red
RNF141	3.23628	-3.30492	1.71875	0.122567	0.176381	-5.17688	Gray
ERO1B	3.23054	-5.59702	3.8194	0.00474409	0.0212601	-1.99971	Red
PTP4A2	3.2233	-3.38587	2.48251	0.0369058	0.0691291	-4.04496	Red
MESD	3.21635	-3.92415	2.91667	0.0186151	0.0431642	-3.37149	Red
SH3BP4	3.18935	-5.58745	4.53414	0.00173663	0.0150172	-0.984072	Red
NECTIN3	3.18712	-5.38319	7.75223	4.43916e-05	0.00674185	2.63508	Red
FAM216A	3.1825	-3.71804	3.53092	0.0072645	0.0251386	-2.4295	Red
PSME3IP1	3.15271	-5.93508	4.01108	0.00359713	0.0195105	-1.72007	Red
TAF7	3.15218	-4.19697	2.0438	0.0739115	0.116127	-4.71038	Gray
TNRC6B	3.1448	-4.3585	2.94081	0.0179263	0.042115	-3.33403	Red
SLC49A4	3.14251	-4.75399	3.92761	0.00405522	0.0196844	-1.84121	Red
AFTPH	3.13919	-5.00936	4.77362	0.00126105	0.0146507	-0.661137	Red
TP53BP2	3.1329	-4.13981	2.10653	0.0669551	0.108829	-4.61716	Gray
PLEKHM1	3.12723	-5.39987	3.25304	0.0110623	0.0312763	-2.8521	Red
ITFG1	3.12509	-5.39852	4.13261	0.00302642	0.018195	-1.54543	Red
ENSG00000241489	3.1227	-5.75843	4.79962	0.00121859	0.0144453	-0.62661	Red
LNPK	3.1161	-4.41871	2.26179	0.0523747	0.0892588	-4.38323	Gray
ENSG00000283761	3.10617	-5.04446	4.50252	0.00181272	0.0152316	-1.02738	Red
MRPL23	3.09531	-5.68515	4.93385	0.00102277	0.0141767	-0.450122	Red
ISCA1	3.08781	-3.38844	2.86358	0.0202276	0.0455898	-3.45391	Red
SMC3	3.07712	-3.34493	1.84379	0.101058	0.149993	-5.0012	Gray
ISCU	3.06763	-4.18538	2.58618	0.0313163	0.0615421	-3.88463	Red
ATP1B2	3.06314	-7.23097	4.80547	0.00120926	0.0144453	-0.618859	Red
MTG2	3.05514	-4.27199	3.43573	0.00838127	0.0270756	-2.57342	Red
ALMS1	3.04192	-5.71907	4.2056	0.00273095	0.0175419	-1.44157	Red
NCS1	3.03656	-5.0143	3.79862	0.00489008	0.0214324	-2.03032	Red
SOCS5	3.03131	-4.17317	1.89675	0.0930643	0.140046	-4.92527	Gray
CALU	3.02904	-4.56683	2.68772	0.0266729	0.0548631	-3.7271	Red
GPSM2	3.02421	-4.75255	4.47781	0.00187467	0.0154366	-1.06133	Red
SYNRG	3.02417	-5.31723	5.31197	0.000633095	0.0123071	0.0317373	Red
FAM110B	3.0102	-5.2759	4.84734	0.00114467	0.0142877	-0.563536	Red
SP3	2.99921	-5.38999	5.54356	0.000476635	0.0123071	0.315753	Red
YOD1	2.99826	-6.58134	4.71603	0.00136088	0.0147608	-0.737973	Red
SSX2IP	2.99615	-6.98109	3.2538	0.0110496	0.0312763	-2.85094	Red
ZNF451	2.99511	-5.29578	5.76858	0.00036427	0.0116642	0.58378	Red
YKT6	2.99309	-4.56591	1.93868	0.0871652	0.132447	-4.86456	Gray
ZNF91	2.98891	-4.15839	2.2973	0.0495079	0.0859583	-4.32918	Red
LINC02977	2.98891	-5.56942	5.78439	0.000357543	0.0116642	0.602322	Red
IGSF1	2.97391	-5.62248	8.7696	1.7626e-05	0.00399789	3.49883	Red
SNHG16	2.97189	-1.90776	5.34562	0.000607234	0.0123071	0.0735253	Red
SNX1	2.97113	-4.26637	4.37329	0.00216322	0.0161722	-1.20599	Red
WDR77	2.96644	-4.94754	3.98582	0.00372959	0.0196565	-1.75662	Red
ZNF667-AS1	2.96419	-5.35342	4.58478	0.00162187	0.0148604	-0.915038	Red
PSKH1	2.96379	-5.43418	3.67131	0.0058958	0.0228731	-2.21908	Red
MECP2	2.9626	-4.59257	2.63506	0.0289867	0.0581697	-3.80885	Red
MX2	2.95502	-5.73099	6.57174	0.000147121	0.0104876	1.47897	Red
MIB1	2.94514	-3.35708	1.24167	0.248256	0.313303	-5.78509	Gray
RNGTT	2.94426	-6.0987	6.61408	0.00014056	0.0104876	1.5236	Red
THAP5	2.92757	-3.97552	3.96288	0.00385447	0.0196565	-1.78991	Red
ADORA3	2.92625	-5.74187	4.43024	0.0020005	0.0159597	-1.12697	Red
VTA1	2.92481	-5.88873	3.34362	0.00963543	0.0289993	-2.71355	Red
ARF6	2.92324	-1.15992	1.21046	0.2594	0.325718	-5.82055	Gray
TCERG1	2.92251	-3.85794	1.66446	0.13317	0.187522	-5.2514	Gray
ANKRD11	2.9214	-6.57246	5.54232	0.000477349	0.0123071	0.314258	Red
C14orf132	2.91631	-5.3378	5.169	0.000757177	0.0129532	-0.147805	Red
C6orf132	2.91575	-3.42542	3.26193	0.0109129	0.0310111	-2.83847	Red
GABBR1	2.9139	-3.82789	1.77977	0.111586	0.162715	-5.09182	Gray
VKORC1L1	2.91078	-5.90643	4.3651	0.0021878	0.0161975	-1.21741	Red
TBCD	2.90671	-6.37175	4.65247	0.00148109	0.0148473	-0.823379	Red
HOXB8	2.89882	-7.10442	4.16296	0.0028996	0.0177752	-1.50215	Red
FAM126A	2.89352	-4.78183	4.27836	0.00246706	0.0171498	-1.33884	Red
WDR26	2.8907	-4.97134	3.01918	0.0158667	0.0391566	-3.21258	Red
IFNGR1	2.88834	-3.80784	3.64558	0.0061245	0.023231	-2.25747	Red
ZNF264	2.88318	-5.08589	5.76591	0.00036542	0.0116642	0.580643	Red
MAP2K6	2.87957	-6.31342	4.83931	0.00115676	0.0142877	-0.574124	Red
C1GALT1	2.87792	-4.32861	2.72827	0.0250207	0.0522836	-3.66412	Red
ITGBL1	2.86203	-5.19875	4.90103	0.00106727	0.0141953	-0.493005	Red
FAM185A	2.85503	-5.63773	3.28168	0.0105886	0.0305675	-2.80821	Red
HGSNAT	2.8526	-5.4612	4.15618	0.00292744	0.0178146	-1.51181	Red
NAV1	2.85045	-2.57007	2.77362	0.0232962	0.0496069	-3.59366	Red
BDNF	2.84985	-5.28143	6.8355	0.000111102	0.0104876	1.753	Red
MSH6	2.84594	-5.25151	2.4219	0.0406298	0.0736175	-4.13835	Red
UBTF	2.8425	-4.55036	4.75884	0.00128589	0.0147302	-0.680805	Red
ZNF295-AS1	2.83987	-5.59744	3.59475	0.00660454	0.0240911	-2.33354	Red
FHIP2A	2.83888	-4.67766	2.97424	0.0170158	0.0408752	-3.2822	Red
LINC01934	2.83374	-5.68029	3.18352	0.0123071	0.0332318	-2.95889	Red
ENSG00000225889	2.83263	-5.54368	3.41346	0.00866777	0.0275687	-2.60721	Red
GATAD1	2.83055	-3.00899	1.70728	0.12474	0.178352	-5.19272	Gray
WDR91	2.82509	-5.11641	3.04347	0.0152792	0.0383905	-3.17498	Red
EPN2	2.82209	-5.73384	3.74086	0.00532171	0.0218565	-2.11571	Red
AQR	2.82187	-5.08974	3.0651	0.0147753	0.0375401	-3.14153	Red
TIPARP	2.81728	-5.05238	2.97277	0.0170549	0.0409153	-3.28448	Red
SHB	2.81713	-5.85587	5.65657	0.000416078	0.0116642	0.451338	Red
ENSG00000253392	2.81294	-5.72046	4.96137	0.000987	0.014154	-0.414288	Red
TACC1	2.81148	-3.26525	1.39791	0.198324	0.258931	-5.59871	Gray
ENSG00000273297	2.80415	-5.87541	3.61496	0.00640905	0.0237698	-2.30326	Red
LLGL1	2.80262	-4.51052	1.92362	0.0892416	0.135108	-4.88642	Gray
SPTLC1	2.80193	-5.75692	3.19811	0.0120341	0.0328283	-2.93643	Red
PTPRK	2.79365	-5.20689	4.99803	0.000941445	0.014154	-0.366737	Red
ENSG00000286235	2.78726	-3.54578	1.61784	0.142943	0.197987	-5.31447	Gray
SF3A1	2.78539	-5.71385	3.2217	0.0116062	0.0321116	-2.90018	Red
RPTOR	2.77339	-6.96836	5.28532	0.00065443	0.0123071	-0.00148551	Red
LINC01204	2.76811	-5.53515	3.71731	0.00550913	0.0223138	-2.15065	Red
TNPO3	2.76794	-2.45373	0.968527	0.360118	0.426433	-6.07283	Gray
MMP13	2.76465	-6.80706	3.5727	0.00682505	0.024353	-2.36664	Red
THRA	2.76401	-4.16337	4.18204	0.00282281	0.0176073	-1.47502	Red
DYRK2	2.76124	-5.61501	5.35904	0.000597248	0.0123071	0.090135	Red
ADAL	2.75194	-4.63904	1.5299	0.163166	0.22177	-5.43088	Gray
MARCHF10	2.74935	-5.56151	3.0088	0.0161246	0.0395585	-3.22865	Red
VPS41	2.74929	-4.52642	3.81124	0.00480084	0.0213513	-2.01172	Red
NEPRO	2.74663	-3.70944	2.65516	0.0280802	0.0569131	-3.77765	Red
TEAD1	2.74469	-5.32061	2.08753	0.0689918	0.11127	-4.64548	Gray
TRIM52	2.73665	-4.81385	3.94892	0.00393262	0.0196781	-1.81019	Red
APMAP	2.73583	-4.57627	2.31939	0.0478038	0.0832895	-4.29548	Red
KPNA4	2.7337	-4.17632	2.24958	0.0533981	0.0907549	-4.40177	Gray
LITAF	2.73303	-2.73993	2.07216	0.0706837	0.113121	-4.66834	Gray
ENSG00000278730	2.73067	-4.65532	4.98308	0.000959739	0.014154	-0.386101	Red
IGLON5	2.73064	-5.74203	4.63195	0.00152231	0.0148604	-0.851085	Red
ELF4	2.72946	-3.99961	1.56339	0.15518	0.212616	-5.38696	Gray
IRAK4	2.72601	-5.01436	4.1408	0.00299161	0.0180545	-1.53373	Red
TMEM220	2.7259	-2.06316	1.24635	0.246619	0.311393	-5.77971	Gray
SLC2A11	2.72496	-5.2208	2.89876	0.0191438	0.0440625	-3.39929	Red
AFF2	2.72262	-7.11279	5.00612	0.000931704	0.014154	-0.356274	Red
WWP2	2.72249	-5.56295	5.83125	0.000338393	0.0116642	0.657056	Red
MARF1	2.72199	-5.31135	3.81622	0.00476611	0.0212727	-2.00439	Red
ADH1B	2.71685	-6.19052	4.00717	0.00361729	0.0195253	-1.72572	Red
ARHGAP27	2.71579	-5.94713	3.07783	0.0144869	0.0371795	-3.12186	Red
ADARB1	2.71213	-6.99313	4.53627	0.00173162	0.0150172	-0.981155	Red
UBE2G1	2.70789	-3.96313	2.45921	0.0382949	0.07067	-4.08089	Red
FMO5	2.70782	-5.75891	3.07728	0.0144993	0.0371795	-3.12271	Red
FEM1B	2.70561	-4.88404	4.05526	0.00337732	0.0191075	-1.65633	Red
NT5E	2.70383	-7.96286	6.01653	0.000272971	0.0116642	0.87022	Red
RAB11FIP3	2.69992	-5.15084	3.64168	0.00615998	0.0232963	-2.26329	Red
POMT1	2.69597	-5.86717	3.57932	0.00675804	0.0242152	-2.3567	Red
ENSG00000205414	2.69429	-6.33426	3.25228	0.0110752	0.0312763	-2.85326	Red
IP6K2	2.68821	-5.4937	4.3968	0.00209439	0.0160744	-1.17331	Red
GMEB2	2.68674	-5.53933	4.8941	0.00107693	0.0141953	-0.502088	Red
PRICKLE2	2.6865	-6.33845	2.87748	0.019792	0.0450641	-3.43233	Red
GUSBP1	2.68422	-5.72791	4.00168	0.00364583	0.0195253	-1.73366	Red
KIF26B	2.68179	-4.77686	1.42554	0.190457	0.2501	-5.5643	Gray
FAM181B	2.68061	-5.41423	5.31298	0.000632303	0.0123071	0.0329926	Red
LINC02449	2.67802	-5.59062	2.77582	0.0232159	0.0495287	-3.59025	Red
MAPK10	2.67485	-5.39785	3.84533	0.00456836	0.0208756	-1.96159	Red
KMT2A	2.67341	-5.28786	5.01944	0.000915903	0.014154	-0.339068	Red
MEAK7	2.67281	-5.66284	3.48895	0.00773621	0.0260484	-2.49284	Red
FUT2	2.6717	-5.43486	3.75528	0.00521023	0.0217819	-2.09434	Red
EPB41L3	2.67047	-4.53834	3.29508	0.0103743	0.0302473	-2.7877	Red
SLC25A13	2.6703	-5.44303	2.85604	0.0204679	0.0459653	-3.46561	Red
MGAT2	2.66977	-6.08314	4.84228	0.00115227	0.0142877	-0.570207	Red
BECN1	2.66916	-4.55057	4.02234	0.00353969	0.0194762	-1.7038	Red
PINX1	2.66828	-4.86853	4.02697	0.00351633	0.0194762	-1.69711	Red
ZNF232-AS1	2.66544	-4.06756	1.74586	0.117569	0.170323	-5.13925	Gray
NDUFV2-AS1	2.66391	-5.62272	5.30627	0.000637595	0.0123071	0.0246388	Red
SMC1A	2.66099	-3.93759	2.09611	0.0680647	0.110131	-4.6327	Gray
RNF217-AS1	2.65855	-5.31738	3.53697	0.00719902	0.0250419	-2.42038	Red
ENSG00000291034	2.65803	-5.96778	5.79343	0.000353759	0.0116642	0.612906	Red
RNF2	2.65741	-4.92664	5.87068	0.000323151	0.0116642	0.702848	Red
PPP2R5C	2.65374	-4.97634	2.3249	0.047388	0.0828542	-4.28707	Red
GLT8D2	2.6516	-5.17159	3.46153	0.00806178	0.0265828	-2.53432	Red
GJC1	2.65137	-4.67919	4.65213	0.00148176	0.0148473	-0.823832	Red
KIAA0319L	2.65122	-5.41041	3.68291	0.00579558	0.0227574	-2.20179	Red
TIAM1	2.64923	-5.0795	4.47952	0.00187033	0.0154366	-1.05899	Red
ATP10A	2.64528	-4.58943	1.43821	0.186941	0.246261	-5.5484	Gray
RPRD1A	2.64046	-5.38059	3.9578	0.00388275	0.0196565	-1.7973	Red
TMEM185A	2.63057	-4.69279	3.79098	0.00494495	0.0214432	-2.04159	Red
MYEF2	2.62943	-5.89348	3.54351	0.007129	0.0249116	-2.41054	Red
C5orf24	2.62845	-5.41646	3.98181	0.00375114	0.0196565	-1.76244	Red
WDFY3-AS2	2.62526	-5.28088	3.37195	0.00922983	0.0282558	-2.67036	Red
ARPIN	2.62384	-5.59665	4.50882	0.00179728	0.0152316	-1.01874	Red
PPP3CB-AS1	2.61929	-6.10677	4.59489	0.00159995	0.0148604	-0.901299	Red
HS2ST1	2.61668	-5.68137	3.13506	0.0132606	0.0347899	-3.03352	Red
PTPRQ	2.61291	-6.05441	3.65093	0.0060762	0.0231794	-2.24948	Red
RICTOR	2.61049	-5.59383	5.11948	0.000806135	0.0134087	-0.210734	Red
ZNF507	2.60829	-5.52578	3.74029	0.00532616	0.0218565	-2.11656	Red
PDIA4	2.6074	-5.29091	2.86088	0.0203135	0.0457009	-3.45811	Red
RNF152	2.60365	-5.4303	3.98148	0.00375289	0.0196565	-1.76292	Red
ZBTB4	2.60288	-2.80504	1.37331	0.205562	0.266707	-5.62898	Gray
STK16	2.5998	-5.73282	4.86145	0.00112376	0.0142877	-0.544961	Red
GPX8	2.59581	-6.44105	3.66279	0.00597053	0.0230239	-2.23179	Red
USP4	2.59546	-4.80059	2.67509	0.0272101	0.0556925	-3.74671	Red
WARS2	2.59369	-3.49673	1.6892	0.128237	0.182413	-5.21758	Gray
SLC6A6	2.59091	-5.22196	3.61979	0.00636329	0.0237698	-2.29603	Red
IFT22	2.58575	-4.63599	4.11134	0.00311884	0.018396	-1.57584	Red
SP110	2.58468	-5.7666	3.09478	0.0141118	0.0364105	-3.09567	Red
EXTL3	2.58135	-5.36683	4.38986	0.00211447	0.0160744	-1.18296	Red
ENSG00000289156	2.58085	-5.57128	4.70909	0.00137347	0.0147608	-0.747258	Red
SETDB2	2.57906	-5.25941	4.28191	0.0024549	0.0171498	-1.33384	Red
YRDC	2.57528	-5.94711	7.60098	5.13408e-05	0.00674185	2.49672	Red
TMLHE	2.5747	-5.664	3.8512	0.00452957	0.0208127	-1.95298	Red
TCAF1	2.56408	-5.59741	4.18789	0.0027997	0.0175973	-1.46671	Red
PRKY	2.55601	-5.51406	2.89785	0.0191709	0.0440843	-3.4007	Red
ENSG00000259994	2.5523	-5.60695	5.72175	0.000385016	0.0116642	0.528643	Red
ACE	2.54814	-4.98965	3.95679	0.00388837	0.0196565	-1.79876	Red
ENSG00000251660	2.54509	-6.31466	3.94298	0.0039664	0.0196781	-1.81884	Red
ZNF619	2.54424	-5.2592	2.34121	0.0461775	0.0814485	-4.26213	Red
WDR7	2.53737	-6.16427	3.50537	0.0075479	0.0257268	-2.46803	Red
ZNF37A	2.53418	-5.87204	3.61952	0.00636583	0.0237698	-2.29644	Red
LMOD1	2.53164	-5.18714	3.12121	0.0135471	0.035467	-3.05488	Red
MARK2	2.53152	-6.05739	2.59378	0.030942	0.0611245	-3.87285	Red
PSEN2	2.53107	-5.46488	5.34973	0.00060416	0.0123071	0.0786086	Red
TMEM234	2.52357	-5.51194	4.64891	0.00148815	0.0148517	-0.828174	Red
RPS6KB1	2.52288	-7.04299	2.16744	0.060813	0.100151	-4.52589	Gray
IFNAR2	2.52255	-5.03854	5.97665	0.000285785	0.0116642	0.824767	Red
ENSG00000290315	2.52022	-4.14029	2.67367	0.0272711	0.0557717	-3.74892	Red
WWOX	2.51541	-5.19183	4.23439	0.0026231	0.017499	-1.40083	Red
MAP7	2.51505	-5.54705	3.97807	0.0037713	0.0196565	-1.76786	Red
TTC19	2.51151	-4.8824	2.74531	0.0243581	0.0511993	-3.63766	Red
GABPB1	2.51089	-5.5891	2.98385	0.0167629	0.0405147	-3.2673	Red
ENSG00000285458	2.50771	-5.40705	3.86644	0.00443039	0.0205879	-1.93061	Red
FSTL4	2.50764	-5.40364	2.84145	0.0209417	0.0464855	-3.48828	Red
IER5L	2.50707	-3.80655	2.42537	0.0404062	0.0734257	-4.133	Red
VBP1	2.50578	-5.37839	2.32896	0.0470837	0.0824378	-4.28086	Red
NFYB	2.50532	-5.37344	3.78118	0.00501637	0.0215049	-2.05606	Red
B3GLCT	2.50272	-5.07721	4.02121	0.00354538	0.0194762	-1.70542	Red
FGF9	2.50248	-5.52569	3.01944	0.0158601	0.0391566	-3.21217	Red
ENSG00000287059	2.5003	-5.74712	2.87351	0.0199154	0.0451307	-3.43849	Red
GPS2	2.49896	-5.00824	2.27792	0.0510524	0.0877848	-4.35869	Gray
FLJ16779	2.49665	-6.16377	3.92811	0.00405233	0.0196844	-1.84049	Red
ENSG00000287769	2.49578	-5.64487	3.84593	0.00456434	0.0208756	-1.9607	Red
HUWE1	2.49419	-5.13346	3.36152	0.009377	0.0284618	-2.68625	Red
UTP25	2.49361	-6.28728	4.80446	0.00121087	0.0144453	-0.620203	Red
E2F5	2.48932	-5.19852	5.04639	0.000884813	0.014154	-0.304337	Red
PSMG3-AS1	2.48869	-5.13652	4.00165	0.003646	0.0195253	-1.73371	Red
GABRR2	2.48742	-5.66796	3.57883	0.00676301	0.0242152	-2.35744	Red
TOR1AIP1	2.48692	-5.17936	2.80783	0.0220766	0.0482321	-3.54051	Red
NCR3	2.4797	-5.68022	3.59041	0.00664735	0.0241766	-2.34005	Red
TANK	2.47838	-5.44736	3.40123	0.00882964	0.0277805	-2.62581	Red
CPT1A	2.47705	-5.3343	4.67548	0.00143629	0.0148473	-0.792384	Red
ITGB5	2.4748	-0.549993	0.885211	0.400928	0.466564	-6.14953	Gray
AP3M2	2.47371	-4.92165	2.89194	0.0193492	0.0442901	-3.40988	Red
LRP12	2.47155	-5.10959	3.37203	0.0092288	0.0282558	-2.67024	Red
AKAP3	2.47113	-5.36766	2.69657	0.026303	0.0542812	-3.71336	Red
FCHSD1	2.46895	-5.05408	4.96334	0.000984489	0.014154	-0.411725	Red
SMG7-AS1	2.46782	-5.66613	4.50369	0.00180983	0.0152316	-1.02577	Red
STAU2	2.46527	-5.44616	5.66098	0.000413894	0.0116642	0.456585	Red
WWC1	2.46479	-5.95372	4.06436	0.00333387	0.0189909	-1.64324	Red
TM7SF3	2.46351	-5.61414	3.2311	0.0114402	0.0319724	-2.88575	Red
C10orf67	2.46273	-6.02355	4.51835	0.00177419	0.0151396	-1.00568	Red
TXNDC11	2.461	-5.2496	4.24041	0.00260113	0.0174457	-1.39233	Red
BBOF1	2.4577	-5.19754	4.58017	0.00163197	0.0148604	-0.921301	Red
ZNF197	2.45673	-4.98958	3.5691	0.00686177	0.024353	-2.37205	Red
WWP1	2.45588	-3.72182	1.98515	0.081047	0.124977	-4.79675	Gray
UBE2Z	2.45443	-5.44073	5.3597	0.000596757	0.0123071	0.0909575	Red
GNAL	2.45346	-5.43589	3.27197	0.0107469	0.0307493	-2.82309	Red
SUMO3	2.45178	-4.84792	3.29587	0.0103619	0.0302473	-2.7865	Red
CCDC8	2.45055	-6.50375	3.6259	0.00630582	0.0236232	-2.28689	Red
N4BP2	2.44524	-5.99291	4.14516	0.00297327	0.0180056	-1.52752	Red
ENSG00000267160	2.44278	-5.87185	5.24171	0.000691059	0.0123071	-0.0561014	Red
MIR9-3HG	2.44065	-5.69383	5.01766	0.000917994	0.014154	-0.341362	Red
LINC01353	2.43924	-5.48783	5.34994	0.000604001	0.0123071	0.0788737	Red
KBTBD7	2.43644	-6.84093	4.29739	0.00240266	0.016934	-1.3121	Red
USP25	2.4356	-4.4779	2.04384	0.0739078	0.116127	-4.71033	Gray
MAT2B	2.43053	-5.27336	2.75562	0.0239656	0.0505873	-3.62163	Red
FMR1	2.42917	-5.00644	6.80264	0.000115008	0.0104876	1.71937	Red
PKNOX1	2.42722	-5.03938	5.31615	0.000629823	0.0123071	0.0369309	Red
ARID1B	2.42373	-5.69995	4.55429	0.00168994	0.0149803	-0.956548	Red
MAP3K2-DT	2.41611	-4.60078	3.04795	0.0151735	0.0382789	-3.16805	Red
ENSG00000264853	2.41455	-5.1082	5.83109	0.000338459	0.0116642	0.656863	Red
THEM4	2.41236	-5.80766	5.91463	0.00030704	0.0116642	0.753619	Red
ARHGAP6	2.41202	-7.99729	5.22534	0.000705377	0.0123071	-0.0766753	Red
HCG20	2.41174	-5.24328	3.27066	0.0107683	0.0307754	-2.82509	Red
PPP2R5E	2.41086	-4.15483	1.84626	0.100671	0.149597	-4.99768	Gray
SFT2D3	2.40482	-5.50308	4.70292	0.00138478	0.0147608	-0.755536	Red
DIPK1C	2.40293	-5.52661	3.23191	0.011426	0.0319724	-2.88451	Red
ARHGEF9	2.40133	-4.99417	2.1352	0.063992	0.10449	-4.57429	Gray
ZDHHC2	2.40125	-6.05268	4.18322	0.00281811	0.0176073	-1.47333	Red
ZNF558	2.40113	-5.43442	3.0144	0.0159849	0.0394095	-3.21998	Red
STX2	2.39873	-4.95564	2.34481	0.0459147	0.0811467	-4.25663	Red
MKLN1	2.39872	-4.86821	1.85435	0.0994128	0.147992	-4.98612	Gray
WHAMM	2.39764	-5.54423	3.22154	0.0116091	0.0321116	-2.90043	Red
SMARCAD1	2.39382	-5.6117	5.13739	0.000788046	0.013285	-0.187934	Red
ZNF394	2.39368	-4.92089	3.496	0.00765473	0.0259491	-2.48218	Red
SEC14L1	2.39308	-5.56511	4.96431	0.000983257	0.014154	-0.410465	Red
GRWD1	2.39268	-5.6634	3.69113	0.00572577	0.0226759	-2.18956	Red
RANBP1	2.39192	-6.02754	2.74219	0.0244781	0.0512785	-3.6425	Red
FAM219B	2.38888	-5.17048	5.8129	0.000345756	0.0116642	0.63566	Red
EPS8	2.38587	-6.29262	4.70242	0.0013857	0.0147608	-0.7562	Red
ENSG00000284906	2.38168	-5.27546	5.6993	0.000395422	0.0116642	0.502082	Red
SORCS1	2.38067	-5.25845	3.6871	0.00575985	0.0227153	-2.19555	Red
ENSG00000279759	2.38043	-6.1865	5.05903	0.000870631	0.0141053	-0.288089	Red
USP36	2.38026	-4.10826	1.10949	0.298289	0.365895	-5.93089	Gray
SLC35A5	2.37536	-5.60927	3.73601	0.00535972	0.0219485	-2.1229	Red
ENSG00000254485	2.37374	-5.32802	4.2232	0.00266447	0.0175419	-1.41665	Red
IRF4	2.36955	-6.02013	6.42507	0.000172588	0.0106748	1.32243	Red
RNF13	2.3669	-3.44658	1.15888	0.278717	0.34494	-5.87777	Gray
FIG4	2.36613	-5.87214	3.97403	0.00379322	0.0196565	-1.77372	Red
GPR63	2.3635	-5.76026	6.37673	0.000182015	0.0106748	1.27018	Red
STX7	2.36093	-5.05122	3.80519	0.00484344	0.0213699	-2.02064	Red
DHFR2	2.36064	-5.15098	3.80331	0.00485675	0.0213699	-2.02341	Red
SFT2D2	2.35384	-4.67188	2.12239	0.0652995	0.106398	-4.59346	Gray
PTGS1	2.35382	-5.8529	4.66305	0.0014603	0.0148473	-0.809113	Red
HDHD5-AS1	2.35351	-5.37713	3.07081	0.0146452	0.0374432	-3.1327	Red
ARMC8	2.34617	-5.48464	5.40676	0.000563146	0.0123071	0.148997	Red
TMEM127	2.34557	-5.09963	4.08138	0.0032542	0.0187511	-1.61879	Red
KCNJ13	2.34545	-6.385	3.41086	0.0087019	0.0275874	-2.61116	Red
AP4M1	2.34392	-4.13273	2.32045	0.0477236	0.0832078	-4.29387	Red
FOXL2	2.34306	-5.2129	4.57195	0.00165015	0.0149171	-0.932489	Red
ERRFI1	2.3425	-8.70337	5.75344	0.000370843	0.0116642	0.565984	Red
GPATCH8	2.34041	-3.8797	1.86714	0.0974566	0.145601	-4.96783	Gray
ENSG00000228274	2.33735	-5.58532	4.1903	0.00279022	0.0175973	-1.46328	Red
ENSG00000291063	2.33683	-5.46395	2.45366	0.0386335	0.0709214	-4.08945	Red
BORA	2.33426	-5.06773	2.48089	0.0370011	0.0692557	-4.04747	Red
IPO7	2.33326	-5.43994	3.95286	0.0039104	0.0196702	-1.80446	Red
DNAJB14	2.3326	-7.43957	4.48692	0.00185156	0.0153616	-1.0488	Red
FAS	2.33079	-2.97595	1.447	0.184538	0.243868	-5.53732	Gray
HDAC6	2.32999	-5.39566	3.2088	0.0118383	0.0325003	-2.92001	Red
RAB30-DT	2.32993	-5.09635	5.39684	0.000570056	0.0123071	0.13679	Red
KDM6B	2.32804	-5.37613	4.30083	0.00239122	0.0169201	-1.30727	Red
RAD50	2.32554	-5.51314	5.83952	0.000335133	0.0116642	0.666679	Red
SLC35F5	2.32419	-5.7737	4.5754	0.00164249	0.0149019	-0.927791	Red
IGHG3	2.32305	-5.3888	4.20455	0.00273499	0.0175419	-1.44307	Red
ENSG00000279865	2.32272	-5.81949	3.18767	0.0122287	0.0331261	-2.9525	Red
TMEM201	2.32244	-5.226	2.33638	0.0465329	0.0817481	-4.26952	Red
GNAZ	2.32212	-5.78616	2.76375	0.023661	0.0501368	-3.609	Red
PPP4R1	2.32032	-4.58323	1.81183	0.10619	0.156309	-5.0466	Gray
PTPRG-AS1	2.31941	-5.32151	3.67515	0.0058624	0.0228186	-2.21335	Red
NAA30	2.31713	-5.42439	5.6238	0.000432725	0.0119961	0.41222	Red
FPGS	2.31664	-9.2386	4.5168	0.00177792	0.0151396	-1.0078	Red
GPRC5C	2.31204	-6.09124	5.66779	0.000410546	0.0116642	0.464681	Red
UBR3	2.31125	-5.03208	2.57717	0.0317663	0.0622111	-3.89859	Red
GLRB	2.30734	-5.94088	4.45111	0.00194422	0.0156985	-1.09813	Red
ENSG00000285693	2.30708	-5.27404	5.42025	0.000553899	0.0123071	0.165566	Red
TCEA3	2.30271	-5.27724	4.46127	0.00191744	0.0155831	-1.08412	Red
ENSG00000286153	2.30051	-5.64243	4.47158	0.00189066	0.0155035	-1.06991	Red
FTCD	2.2994	-6.1267	4.665	0.00145651	0.0148473	-0.806485	Red
MPP3	2.29894	-5.18771	4.24071	0.00260001	0.0174457	-1.3919	Red
FCHO2	2.29889	-5.6645	4.41388	0.00204585	0.0160012	-1.14962	Red
DZANK1	2.29812	-6.39327	3.0314	0.0155682	0.0387652	-3.19366	Red
ENSG00000286340	2.29779	-5.5465	4.89001	0.00108268	0.0141953	-0.507447	Red
ACTN2	2.29647	-5.50796	4.3717	0.00216799	0.0161722	-1.20822	Red
MITF	2.2962	-5.00769	3.17178	0.0125313	0.0336552	-2.97696	Red
ATP2A2	2.29569	-6.7961	2.79296	0.0225986	0.0487209	-3.56362	Red
CAMK2B	2.29512	-5.61549	2.72403	0.0251885	0.0525463	-3.67071	Red
RAB4A	2.29196	-4.08862	2.73291	0.0248386	0.0519466	-3.65692	Red
ZNF496-DT	2.29123	-4.62655	2.9421	0.0178902	0.042107	-3.33203	Red
ENSG00000243960	2.29054	-6.28898	3.23092	0.0114434	0.0319724	-2.88603	Red
ZNF516	2.2889	-5.13852	4.48626	0.00185324	0.0153616	-1.04971	Red
RC3H2	2.28638	-5.5485	3.0088	0.0161246	0.0395585	-3.22865	Red
APOBEC3D	2.28578	-6.07186	5.68903	0.000400281	0.0116642	0.489913	Red
ATP8B2	2.27824	-5.41031	5.23076	0.000700594	0.0123071	-0.069849	Red
RPGR	2.27731	-5.3304	3.85904	0.00447829	0.0206531	-1.94147	Red
ZNF577	2.27365	-5.12945	3.78256	0.00500621	0.0214983	-2.05402	Red
MIR99AHG	2.27339	-4.99282	2.20869	0.0569703	0.0953558	-4.46369	Gray
WAKMAR2	2.27251	-5.07315	3.83941	0.00460784	0.0209409	-1.97028	Red
ENSG00000289210	2.2713	-5.45458	3.61233	0.00643414	0.0237698	-2.3072	Red
MAP3K14-AS1	2.27069	-5.68567	4.26549	0.00251167	0.0172156	-1.35695	Red
ENSG00000230333	2.27005	-4.97024	4.21481	0.00269594	0.0175419	-1.42853	Red
TMEM268	2.26765	-5.11181	2.39776	0.0422158	0.075885	-4.17545	Red
RBM33	2.26727	-3.46646	1.63985	0.138251	0.192917	-5.28481	Gray
ZHX1-C8orf76	2.26723	-7.57375	7.2508	7.2529e-05	0.00822544	2.16572	Red
TSTD3	2.26665	-5.66531	4.32304	0.00231869	0.0168029	-1.27614	Red
MTPAP	2.26608	-4.14519	1.32976	0.218935	0.28215	-5.68175	Gray
HIVEP3	2.26414	-4.89554	2.00101	0.0790542	0.12213	-4.77347	Gray
FBXO3	2.25603	-5.13329	3.4641	0.00803056	0.0265381	-2.53042	Red
LRPPRC	2.25548	-5.73961	5.12584	0.00079966	0.0133903	-0.202631	Red
PTPN1	2.23975	-5.18084	4.20566	0.00273074	0.0175419	-1.44149	Red
HOXD3	2.23868	-5.37436	4.61742	0.00155226	0.0148604	-0.87075	Red
YTHDF1	2.23831	-5.41066	4.92224	0.00103827	0.0141953	-0.465268	Red
ENSG00000287865	2.23698	-5.88648	4.16463	0.0028928	0.0177752	-1.49978	Red
EMSY	2.2363	-5.30453	2.9137	0.0187016	0.0433244	-3.37609	Red
MSANTD3	2.2361	-5.72565	3.33431	0.00977263	0.0291727	-2.72775	Red
FTSJ1	2.23433	-5.00413	4.09801	0.00317829	0.018571	-1.59493	Red
GRASLND	2.22464	-5.66016	4.72394	0.00134667	0.0147608	-0.727383	Red
KAT6B	2.22397	-4.83408	2.9483	0.017718	0.0418224	-3.32241	Red
MAP3K7	2.22318	-5.36791	3.43946	0.00833423	0.0270754	-2.56775	Red
GPR179	2.22259	-5.40951	4.213	0.0027028	0.0175419	-1.4311	Red
XCR1	2.21828	-5.50395	4.30516	0.00237688	0.0169201	-1.30119	Red
ELK4	2.21808	-5.13491	4.21886	0.00268069	0.0175419	-1.42279	Red
PPP5D1P	2.2175	-5.33753	4.37055	0.00217142	0.0161722	-1.20982	Red
RETREG1	2.21743	-5.18622	2.65894	0.0279129	0.0566201	-3.77178	Red
SRGAP2	2.21688	-4.91379	2.64516	0.0285273	0.057539	-3.79317	Red
PTPN21	2.21516	-5.51124	3.58359	0.00671523	0.0242117	-2.35029	Red
EOLA2	2.21134	-4.03259	2.28145	0.0507679	0.0875368	-4.35333	Gray
MTCH2	2.21127	-1.50155	1.09759	0.303162	0.370054	-5.94343	Gray
TOP3A	2.20988	-6.57159	4.93919	0.00101571	0.0141576	-0.443155	Red
SLC35G1	2.20978	-4.97591	2.06086	0.0719534	0.114274	-4.68511	Gray
SLC1A2	2.2047	-5.39006	3.61388	0.0064194	0.0237698	-2.30488	Red
TMEM18	2.20438	-8.50941	4.17692	0.0028432	0.0176462	-1.48229	Red
POR	2.20356	-5.49151	4.59418	0.00160149	0.0148604	-0.902265	Red
SOCS2	2.20346	-5.33924	2.80625	0.0221314	0.0483096	-3.54297	Red
TP53I11	2.20134	-5.5215	4.26112	0.002527	0.0172264	-1.3631	Red
ARL17A	2.20063	-5.28552	4.58453	0.00162242	0.0148604	-0.915377	Red
SYNM	2.19974	-6.1014	3.15643	0.012831	0.0340206	-3.00059	Red
TRIM13	2.19971	-5.42446	2.81829	0.0217168	0.0476967	-3.52426	Red
TRERF1	2.19534	-5.28875	3.27795	0.010649	0.0306016	-2.81392	Red
AGFG1	2.19497	-4.66147	2.32196	0.0476091	0.0831126	-4.29155	Red
RAB22A	2.19433	-4.63911	2.58806	0.0312232	0.0614368	-3.88171	Red
PSMB8-AS1	2.19238	-4.92159	5.49605	0.000504912	0.0123071	0.258171	Red
METTL3	2.19226	-5.19374	5.11324	0.000812555	0.013426	-0.218704	Red
ZMYM5	2.19177	-3.83491	1.70772	0.124655	0.178334	-5.19211	Gray
FOXO3B	2.18988	-6.3122	4.24192	0.00259563	0.0174457	-1.39019	Red
AKAP9	2.189	-4.9361	2.69573	0.0263383	0.054309	-3.71468	Red
SLC24A1	2.18891	-5.71362	6.36703	0.000183974	0.0106748	1.25965	Red
ZNF101	2.18871	-5.52405	4.15749	0.00292201	0.0178146	-1.50993	Red
PTPDC1	2.18766	-5.75388	4.10055	0.00316688	0.0185478	-1.59129	Red
ZNF300	2.18683	-5.49068	3.98303	0.00374456	0.0196565	-1.76067	Red
DGKE	2.18646	-5.27362	3.64993	0.00608516	0.0231794	-2.25097	Red
POLR2J4	2.18244	-5.31126	3.27907	0.0106309	0.030593	-2.81221	Red
EFCAB13-DT	2.18226	-5.74472	5.09899	0.000827401	0.0134926	-0.236897	Red
EFHC2	2.17746	-5.30997	3.66102	0.0059861	0.0230483	-2.23441	Red
TRABD	2.17626	-5.24261	3.89659	0.00424105	0.0202141	-1.88649	Red
TFCP2L1	2.17587	-6.08186	3.69567	0.00568753	0.0226684	-2.1828	Red
ZMAT3	2.17354	-6.49101	4.12121	0.00307559	0.0182705	-1.56172	Red
MIER3	2.17296	-5.45064	3.68078	0.00581384	0.0227716	-2.20496	Red
PRR5-ARHGAP8	2.16834	-5.37867	3.91943	0.00410338	0.0198235	-1.85314	Red
VAMP4	2.16794	-6.06422	4.52784	0.00175151	0.0150172	-0.992687	Red
AQP9	2.16614	-5.50127	4.05053	0.00340015	0.0191498	-1.66314	Red
ALDH4A1	2.16573	-5.57854	5.48989	0.000508713	0.0123071	0.250674	Red
SLC4A7	2.16564	-5.87811	3.14523	0.0130542	0.034466	-3.01784	Red
REV1	2.16559	-5.49678	3.11862	0.0136015	0.0355348	-3.05888	Red
GULP1	2.16487	-5.5412	4.2451	0.00258414	0.0174457	-1.38571	Red
VMAC	2.16172	-5.3135	4.79056	0.00123321	0.0144453	-0.638626	Red
LINC02446	2.161	-5.84572	3.58493	0.00670185	0.0242074	-2.34828	Red
SLC38A3	2.16058	-5.59035	5.47427	0.000518482	0.0123071	0.231659	Red
SIRT1	2.16006	-5.58039	3.42373	0.00853443	0.0272992	-2.59163	Red
PRDM10	2.15772	-5.17553	3.43107	0.00844033	0.0271374	-2.58048	Red
VASH1	2.15274	-5.66413	4.79723	0.00122244	0.0144453	-0.629787	Red
POU2F1	2.15206	-4.8796	2.41981	0.0407647	0.0737548	-4.14157	Red
FBXL22	2.15201	-5.38433	3.90374	0.00419744	0.0200859	-1.87604	Red
DLGAP2	2.1519	-5.80683	3.66669	0.00593617	0.0229624	-2.22597	Red
USP13	2.15141	-5.42031	3.71342	0.00554076	0.0224055	-2.15642	Red
EXD3	2.15093	-5.6983	4.99239	0.000948297	0.014154	-0.374033	Red
EVA1A	2.15076	-4.74971	1.93547	0.0876045	0.132952	-4.86923	Gray
SLC12A2-DT	2.14978	-5.52359	3.70359	0.00562156	0.0225846	-2.17103	Red
GLDC	2.14973	-5.36948	5.69278	0.000398502	0.0116642	0.494353	Red
VIPAS39	2.14895	-5.81986	6.5792	0.000145942	0.0104876	1.48685	Red
ATP2C1	2.14812	-5.80898	3.93537	0.00401014	0.0196844	-1.82992	Red
FABP5P3	2.14448	-6.60109	4.68526	0.0014177	0.0148473	-0.779234	Red
KIAA1614	2.14315	-5.87764	4.49777	0.00182444	0.0152751	-1.0339	Red
FAM210B	2.14263	-10.0215	5.4957	0.000505125	0.0123071	0.257749	Red
FBXW11	2.1426	-4.91714	3.6051	0.00650369	0.0239017	-2.31803	Red
NFE2L1	2.14219	-5.35622	4.80899	0.00120368	0.0144453	-0.614196	Red
SULF1	2.14133	-6.64035	2.7513	0.0241293	0.0508468	-3.62835	Red
USP35	2.14131	-5.39962	7.17525	7.8272e-05	0.00849081	2.09229	Red
VRK3	2.14116	-5.49313	3.54779	0.00708358	0.0248128	-2.4041	Red
ETV6	2.1403	-5.23891	4.01499	0.00357705	0.0195098	-1.71441	Red
SHLD2	2.13872	-5.89371	4.42267	0.00202135	0.0159597	-1.13744	Red
PSAPL1	2.13805	-5.8852	3.51005	0.00749515	0.0256265	-2.46097	Red
ZNF546	2.13796	-5.85762	4.63092	0.00152442	0.0148604	-0.852478	Red
MIEF1	2.13759	-5.55461	3.3234	0.0099362	0.0294864	-2.74441	Red
TBC1D15	2.13315	-4.80654	1.96076	0.0842055	0.128654	-4.83242	Gray
SMURF2	2.13313	-4.73874	2.33847	0.0463783	0.0815575	-4.26632	Red
MDM4	2.13278	-5.71918	3.3416	0.00966493	0.029053	-2.71662	Red
FSBP	2.13277	-6.2656	2.74269	0.0244585	0.0512785	-3.64172	Red
ZGRF1	2.13263	-5.57344	4.41675	0.00203783	0.0160012	-1.14565	Red
FGF10	2.13184	-5.32062	4.1878	0.00280005	0.0175973	-1.46683	Red
PTCD3	2.13083	-5.39738	3.76363	0.00514684	0.0217526	-2.08199	Red
DPY19L2P3	2.12986	-5.15564	4.67229	0.00144242	0.0148473	-0.796679	Red
L3MBTL4	2.12871	-5.4168	4.53945	0.00172418	0.0150172	-0.976807	Red
ZHX1	2.12618	-4.00044	1.99748	0.0794942	0.122658	-4.77866	Gray
GRB14	2.12452	-5.63584	3.28113	0.0105975	0.0305675	-2.80906	Red
FAM102A	2.12447	-6.15964	3.27535	0.0106914	0.0306609	-2.8179	Red
ZNF135	2.12403	-5.05321	3.07073	0.0146471	0.0374432	-3.13284	Red
LINC00649	2.1236	-5.20603	5.44553	0.000537008	0.0123071	0.19655	Red
LINC02608	2.12357	-5.03169	4.30002	0.00239391	0.0169201	-1.30841	Red
ENSG00000277559	2.1173	-5.7329	3.93636	0.00400441	0.0196844	-1.82847	Red
ENSG00000291032	2.11727	-5.81084	4.66868	0.00144937	0.0148473	-0.801529	Red
LINC02928	2.11397	-6.76443	2.83349	0.0212048	0.0466955	-3.50065	Red
SERF1B	2.11302	-4.78102	4.71406	0.00136443	0.0147608	-0.740599	Red
ZNF496	2.11285	-5.02277	4.04145	0.00344442	0.0192353	-1.67622	Red
ENSG00000290928	2.11143	-5.68459	4.3751	0.00215785	0.0161722	-1.20348	Red
CAMK4	2.11116	-5.1608	3.06819	0.0147049	0.037508	-3.13676	Red
GTF3C3	2.11069	-5.498	5.01187	0.00092485	0.014154	-0.348846	Red
FKBP5	2.11068	-5.74997	3.93088	0.0040362	0.0196844	-1.83646	Red
SERBP1	2.10984	1.33292	0.751485	0.473102	0.538498	-6.26053	Gray
UMAD1	2.10892	-3.02399	1.64597	0.136971	0.19139	-5.27652	Gray
AP2B1	2.10783	-3.33968	1.18995	0.266947	0.333349	-5.84351	Gray
ETFBKMT	2.10689	-7.76364	5.29852	0.000643773	0.0123071	0.0149732	Red
ZNF493	2.1068	-5.51105	4.79159	0.00123155	0.0144453	-0.637269	Red
FAM72A	2.10612	-5.47342	3.93869	0.00399099	0.0196844	-1.82508	Red
RNF121	2.10473	-3.44239	1.10248	0.301152	0.368253	-5.93829	Gray
TPH1	2.10395	-5.31154	4.11475	0.00310383	0.0183508	-1.57096	Red
NKAIN3	2.1033	-5.7637	4.06901	0.00331191	0.0189714	-1.63656	Red
STX18	2.10268	-6.66695	3.75534	0.00520981	0.0217819	-2.09426	Red
ENSG00000228933	2.1026	-7.9962	4.26697	0.00250651	0.0172156	-1.35487	Red
ZNF286A-TBC1D26	2.10166	-5.62152	1.98133	0.0815332	0.125494	-4.80234	Gray
GAB1	2.09939	-6.07616	5.32208	0.000625207	0.0123071	0.0443027	Red
TOP3B	2.09545	-5.41451	3.56	0.00695556	0.0245809	-2.38572	Red
LINC01305	2.09499	-5.54224	3.50889	0.00750819	0.0256265	-2.46272	Red
GORAB	2.09356	-5.16534	3.6581	0.00601201	0.0230902	-2.23877	Red
GPNMB	2.09256	-4.60992	2.22144	0.0558316	0.094296	-4.4444	Gray
LINC00906	2.09188	-5.23129	3.38763	0.00901317	0.0280728	-2.64649	Red
ACP3	2.08927	-7.61932	5.01802	0.000917574	0.014154	-0.340901	Red
ASAH1	2.08901	-6.33993	3.52759	0.00730079	0.0252292	-2.43452	Red
SURF4	2.08813	-7.13783	3.10811	0.0138239	0.0359414	-3.07509	Red
ENSG00000289142	2.08796	-5.42876	3.73232	0.00538886	0.0219693	-2.12837	Red
ENPP6	2.08689	-5.04732	3.16628	0.0126378	0.0337393	-2.98542	Red
ENSG00000280399	2.08552	-5.29484	3.10395	0.0139132	0.0360473	-3.08152	Red
SH3BGR	2.08328	-5.3223	3.80653	0.00483392	0.0213699	-2.01866	Red
TMEM120B	2.08318	-5.35305	2.80425	0.0222012	0.0484197	-3.54608	Red
CANT1	2.08222	-5.43521	3.22469	0.0115533	0.0320996	-2.89561	Red
ENSG00000274265	2.07675	-5.3856	4.71297	0.00136641	0.0147608	-0.74206	Red
NECAP2	2.07501	-5.28615	2.64721	0.0284352	0.0573995	-3.78999	Red
ZNF268	2.07378	-5.12568	4.0147	0.00357853	0.0195098	-1.71483	Red
KIF16B	2.07182	-5.45896	3.95081	0.00392195	0.0196781	-1.80745	Red
TP53TG3D	2.07132	-5.86104	6.42664	0.000172292	0.0106748	1.32412	Red
USP11	2.07124	-5.74716	2.6245	0.0294746	0.0587842	-3.82523	Red
IDO2	2.06832	-5.38007	3.62768	0.00628919	0.0235963	-2.28422	Red
ITGA3	2.06593	-5.37273	3.22643	0.0115224	0.0320996	-2.89292	Red
RGS17	2.06266	-6.59308	3.63085	0.00625972	0.0235405	-2.27949	Red
ENSG00000286369	2.06189	-5.42591	3.89589	0.00424536	0.0202141	-1.88751	Red
ZNF492	2.05714	-5.71759	3.3093	0.0101518	0.0299395	-2.76595	Red
FBXO32	2.05488	-5.40682	2.6544	0.0281138	0.0569351	-3.77883	Red
ZNF383	2.05389	-5.42959	4.59035	0.00160975	0.0148604	-0.907461	Red
PABPC1L	2.05255	-5.22154	3.19213	0.0121452	0.0330089	-2.94563	Red
SH3RF3-AS1	2.05249	-6.5889	3.92974	0.00404281	0.0196844	-1.83812	Red
BTD	2.05056	-5.09175	4.73949	0.00131921	0.0147608	-0.706601	Red
WNT7B	2.05006	-5.33067	5.39943	0.000568246	0.0123071	0.139974	Red
ENSG00000240591	2.04923	-5.83215	5.77308	0.000362344	0.0116642	0.589054	Red
ATP6V1B2	2.04891	-6.6936	4.21143	0.00270874	0.0175419	-1.43332	Red
SNX25	2.04813	-5.28824	4.97986	0.000963727	0.014154	-0.390274	Red
ENSG00000278962	2.04671	-5.40178	5.40148	0.000566815	0.0123071	0.142498	Red
ATP13A3-DT	2.04669	-5.87946	2.88505	0.0195589	0.0446472	-3.42057	Red
BACE1-AS	2.04333	-5.53267	3.93502	0.00401217	0.0196844	-1.83043	Red
PRPS1	2.04271	-5.328	2.8928	0.019323	0.0442708	-3.40854	Red
TANGO6	2.04202	-6.06807	3.65482	0.00604131	0.0231182	-2.24367	Red
ZNF136	2.03981	-5.42389	3.02205	0.015796	0.0390981	-3.20813	Red
RNF144B	2.03854	-4.6315	1.52681	0.163921	0.222516	-5.43491	Gray
HEY2	2.03726	-5.592	4.30959	0.00236234	0.0169201	-1.29499	Red
LMBRD1	2.03579	-5.7472	3.61822	0.00637811	0.0237698	-2.29838	Red
SLC29A4	2.03436	-5.8389	3.20991	0.011818	0.0325003	-2.9183	Red
KIAA0825	2.03017	-5.25146	4.21368	0.00270023	0.0175419	-1.43013	Red
SPG11	2.0288	-4.57655	2.33945	0.0463066	0.0815349	-4.26482	Red
KAZN	2.02746	-6.09691	2.55022	0.0331511	0.0644677	-3.94032	Red
YPEL1	2.02576	-5.80346	4.73043	0.00133514	0.0147608	-0.71871	Red
TRIM54	2.02564	-5.5668	3.17242	0.012519	0.0336552	-2.97597	Red
ENSG00000285772	2.02512	-5.41373	3.15695	0.0128207	0.0340206	-2.99979	Red
CABP4	2.02495	-5.90344	3.29383	0.010394	0.0302603	-2.78961	Red
YPEL2	2.02198	-5.34388	2.04686	0.0735565	0.115955	-4.70585	Gray
DNAJC5	2.02066	-5.84247	3.35697	0.00944196	0.0286035	-2.69318	Red
SLC10A7	2.01902	-5.35291	3.1724	0.0125194	0.0336552	-2.976	Red
TRAK2	2.01899	-5.17928	5.00954	0.00092762	0.014154	-0.351854	Red
PUM2	2.01844	-5.11149	2.054	0.0727352	0.115149	-4.69529	Gray
BRI3BP	2.01653	-6.1713	3.36865	0.0092762	0.02835	-2.67539	Red
MIR924HG	2.01622	-5.34266	5.2578	0.000677294	0.0123071	-0.0359197	Red
PPP4R3A	2.01488	-4.14212	1.30492	0.226891	0.290602	-5.71136	Gray
MPP7	2.0136	-5.24912	4.58248	0.0016269	0.0148604	-0.918164	Red
STARD9	2.01359	-5.79928	3.30263	0.0102555	0.030111	-2.77615	Red
CCDC136	2.01319	-5.38947	4.31117	0.00235717	0.0169201	-1.29278	Red
SMCHD1	2.01221	-6.29021	3.99999	0.00365463	0.0195253	-1.7361	Red
FZD1	2.01015	-6.00607	3.3863	0.00903129	0.0280728	-2.64851	Red
EXOC7	2.00984	-5.15142	5.33058	0.00061865	0.0123071	0.0548664	Red
TBC1D24	2.00726	-6.03162	5.89677	0.000313479	0.0116642	0.73302	Red
TTLL3	2.00577	-4.62822	1.61967	0.142548	0.197697	-5.31202	Gray
SLC16A7	2.00347	-5.79748	4.13074	0.0030344	0.0181991	-1.54809	Red
HMGCS1	2.00252	-5.92658	4.79122	0.00123214	0.0144453	-0.637755	Red
PTPRE	2.00093	-5.32912	4.11677	0.00309495	0.0183418	-1.56807	Red
BCO1	2.00062	-5.32398	3.92991	0.00404181	0.0196844	-1.83787	Red
SOS1	1.99944	-5.77464	4.66848	0.00144976	0.0148473	-0.801804	Red
PCMTD2	1.99849	-5.14418	3.28389	0.010553	0.0305095	-2.80483	Red
ASXL1	1.99764	-6.29707	3.95644	0.00389034	0.0196565	-1.79927	Red
WDR89	1.99752	-6.34904	3.9187	0.00410771	0.0198235	-1.85421	Red
ZFP37	1.99608	-5.64506	2.89491	0.0192595	0.044179	-3.40527	Red
PPARGC1A	1.99494	-5.27496	2.80169	0.0222907	0.0484875	-3.55006	Red
ENSG00000244055	1.99477	-7.01817	2.92648	0.0183319	0.0428661	-3.35627	Red
C18orf25	1.99342	-5.61416	3.33518	0.00975972	0.0291727	-2.72642	Red
SH3RF1	1.9923	-5.56933	3.41538	0.00864269	0.0275396	-2.6043	Red
PRKCQ-AS1	1.99174	-5.55901	2.80171	0.0222899	0.0484875	-3.55002	Red
FUT5	1.99146	-5.9355	3.40799	0.00873976	0.0276722	-2.61553	Red
WDR76	1.99109	-5.38361	3.56944	0.0068583	0.024353	-2.37154	Red
SRGAP1	1.99063	-4.83845	2.01972	0.0767648	0.119283	-4.74594	Gray
MED21	1.98793	-5.43673	1.93715	0.0873743	0.132683	-4.86679	Gray
AGPAT5	1.9867	-5.92569	6.93735	9.98948e-05	0.0099695	1.85631	Red
ITGB2	1.9834	-5.25854	3.06593	0.0147564	0.0375303	-3.14025	Red
GATB	1.98159	-6.14391	6.32839	0.00019201	0.0108878	1.2176	Red
NEK10	1.98147	-4.83165	3.99125	0.00370067	0.0196565	-1.74875	Red
CUL4B	1.98102	-5.67295	4.05224	0.00339186	0.0191463	-1.66067	Red
ASPSCR1	1.97848	-6.33826	3.24651	0.0111735	0.0314648	-2.86211	Red
PRDM16-DT	1.97786	-6.29018	4.53608	0.00173207	0.0150172	-0.981416	Red
BOD1L1	1.97634	-5.7807	4.34066	0.00226287	0.0164602	-1.25151	Red
USP9X	1.97552	-5.12115	3.99647	0.00367313	0.0195822	-1.7412	Red
CAPN10	1.97507	-5.05733	3.56973	0.00685535	0.024353	-2.3711	Red
STARD13	1.97208	-5.56048	2.74344	0.0244298	0.0512635	-3.64056	Red
WDR48	1.97108	-5.56215	3.70572	0.00560388	0.0225846	-2.16785	Red
ENSG00000273230	1.97074	-5.19948	2.66928	0.0274609	0.0560678	-3.75574	Red
RNLS	1.96973	-6.16524	3.16572	0.0126487	0.0337393	-2.98628	Red
HOXA4	1.96857	-5.40367	3.9804	0.0037587	0.0196565	-1.76448	Red
ENSG00000283201	1.96824	-5.40429	5.24527	0.000687984	0.0123071	-0.051628	Red
ENSG00000282034	1.96797	-4.91372	3.87847	0.00435382	0.0204958	-1.913	Red
ENSG00000231856	1.96698	-5.216	2.4568	0.0384416	0.0707562	-4.08461	Red
ARFRP1	1.96685	-6.07823	3.56284	0.00692613	0.0245116	-2.38145	Red
RPE	1.96684	-4.03307	1.94226	0.0866792	0.131788	-4.85937	Gray
CAAP1	1.96677	-6.07748	3.1622	0.0127173	0.0337909	-2.99169	Red
ADAT2	1.96529	-5.30346	3.97203	0.00380414	0.0196565	-1.77662	Red
PRKD1	1.96491	-5.3959	3.5422	0.00714302	0.0249257	-2.41251	Red
ZNF436-AS1	1.96343	-5.25759	4.69993	0.0013903	0.0147608	-0.759544	Red
SIN3A	1.96189	-5.00707	3.36683	0.00930178	0.0283716	-2.67816	Red
FAM210A	1.96182	-9.86378	3.604	0.00651428	0.0239017	-2.31967	Red
SFXN1	1.96114	-5.25087	2.56602	0.0323319	0.0631206	-3.91586	Red
ENSG00000286638	1.95983	-5.53346	4.61052	0.0015667	0.0148604	-0.880094	Red
FRMD3	1.9583	-5.42069	2.03476	0.0749706	0.117421	-4.72375	Gray
SMC5-DT	1.9578	-5.24353	4.91841	0.00104344	0.0141953	-0.470274	Red
RAX	1.95721	-6.22084	5.10148	0.000824779	0.0134926	-0.233708	Red
ABCA7	1.95636	-5.35441	5.32176	0.00062545	0.0123071	0.043912	Red
SEMA6A-AS1	1.95302	-6.01399	5.48169	0.000513819	0.0123071	0.240691	Red
ENTPD4	1.95137	-5.58826	3.60894	0.00646666	0.0238321	-2.31228	Red
HGF	1.95016	-5.60474	5.42113	0.000553299	0.0123071	0.166651	Red
ZBTB7A	1.94843	-2.65427	0.633231	0.54361	0.603071	-6.34543	Gray
AMMECR1	1.9435	-6.0936	3.47428	0.00790859	0.0263444	-2.51502	Red
ZMYM3	1.94138	-5.15405	4.01995	0.00355177	0.0194762	-1.70724	Red
RB1-DT	1.94076	-5.82145	3.76287	0.00515262	0.0217526	-2.08312	Red
TLL1	1.94031	-5.92276	2.67961	0.0270169	0.0553879	-3.73971	Red
PMS2P3	1.93936	-5.24978	3.64534	0.00612666	0.023231	-2.25782	Red
KIF15	1.93779	-5.40194	3.94526	0.00395339	0.0196781	-1.81552	Red
ZCCHC8	1.93652	-4.92447	2.51229	0.0352043	0.0674614	-3.99897	Red
ZNF850	1.93598	-5.22712	2.5963	0.0308187	0.0609553	-3.86894	Red
RBP5	1.93595	-5.32568	5.25944	0.000675907	0.0123071	-0.0338642	Red
FHL5	1.93554	-5.54724	3.83708	0.00462352	0.0209728	-1.97371	Red
GNB1-DT	1.93406	-5.37089	3.37235	0.00922422	0.0282558	-2.66974	Red
SULT1A1	1.93368	-5.24826	3.06242	0.0148368	0.0375816	-3.14568	Red
EIF4E3	1.93327	-5.67726	5.72581	0.000383171	0.0116642	0.533428	Red
GABPB1-AS1	1.93249	-7.23134	3.74104	0.00532024	0.0218565	-2.11544	Red
FRMD5	1.93208	-5.43075	3.73408	0.00537496	0.0219485	-2.12576	Red
GSAP	1.93202	-5.82727	4.48818	0.0018484	0.0153616	-1.04707	Red
ABHD12B	1.92654	-5.55629	3.17643	0.0124418	0.0335593	-2.96978	Red
H3C6	1.92569	-5.95017	3.94285	0.00396716	0.0196781	-1.81903	Red
SPON1	1.9236	-4.47125	1.27501	0.236793	0.300508	-5.74653	Gray
ANKRD9	1.92308	-6.66769	2.59271	0.0309942	0.0611792	-3.8745	Red
FAM227B	1.92059	-5.73139	3.81882	0.00474809	0.0212601	-2.00056	Red
ENSG00000279594	1.92024	-5.39452	3.11581	0.0136605	0.0356142	-3.06321	Red
POGZ	1.92009	-5.30119	1.40881	0.195187	0.25537	-5.58518	Gray
ANKRD18DP	1.92006	-5.36767	5.8008	0.000350709	0.0116642	0.621517	Red
JHY	1.91989	-6.29188	3.41215	0.00868498	0.0275687	-2.60921	Red
NETO1	1.91979	-5.66338	2.62573	0.0294172	0.0587372	-3.82332	Red
SORBS1	1.91949	-5.81915	5.86034	0.000327075	0.0116642	0.690859	Red
LINC00960	1.91738	-5.66042	3.96889	0.00382133	0.0196565	-1.78118	Red
STAT4	1.91515	-5.7767	3.16526	0.0126576	0.0337393	-2.98699	Red
IDO1	1.9139	-5.19765	4.20736	0.00272423	0.0175419	-1.43908	Red
TANC2	1.91389	-5.65507	3.33607	0.00974654	0.0291727	-2.72506	Red
TTC21B	1.91351	-5.72594	5.45151	0.000533094	0.0123071	0.203866	Red
KANSL1L	1.91349	-5.23453	3.76711	0.00512071	0.0217209	-2.07685	Red
GPRC5D-AS1	1.91191	-7.87559	3.74557	0.00528501	0.0218565	-2.10873	Red
WHRN	1.91165	-6.31505	3.83587	0.00463167	0.0209728	-1.97549	Red
ATXN7	1.91137	-4.68305	2.90951	0.0188245	0.0434881	-3.3826	Red
MSH5-SAPCD1	1.90794	-5.50542	3.31043	0.0101343	0.0299233	-2.76423	Red
STK10	1.90685	-5.26004	3.09601	0.014085	0.0363788	-3.09377	Red
SLC9A7	1.90637	-5.24426	5.70718	0.000391735	0.0116642	0.511414	Red
RAI14	1.90586	-5.73573	4.84776	0.00114405	0.0142877	-0.56299	Red
UGGT1	1.90414	-6.2086	4.61015	0.00156747	0.0148604	-0.880593	Red
ZNF41	1.90324	-5.78268	4.40666	0.00206623	0.0160744	-1.15963	Red
MTHFSD	1.90056	-5.63477	5.69144	0.000399137	0.0116642	0.492767	Red
RAB36	1.90032	-5.67717	4.84804	0.00114362	0.0142877	-0.562617	Red
AMPH	1.9003	-5.58333	2.83433	0.0211768	0.0466955	-3.49934	Red
SRSF4	1.89988	-4.96644	3.16448	0.0126728	0.0337393	-2.98819	Red
NAXD	1.89906	-4.97274	3.67568	0.00585786	0.0228186	-2.21257	Red
SYK	1.89769	-5.7034	4.58883	0.00161305	0.0148604	-0.909527	Red
DIXDC1	1.89414	-5.01601	3.02348	0.015761	0.0390504	-3.20592	Red
RBL1	1.89334	-5.52372	3.7591	0.00518117	0.0217819	-2.0887	Red
INPP4B	1.89274	-5.33946	4.45363	0.00193754	0.0156953	-1.09466	Red
GPATCH2L	1.89105	-5.46361	3.05271	0.0150618	0.0380494	-3.16069	Red
VIP	1.89014	-6.18039	6.39533	0.000178322	0.0106748	1.29033	Red
ACAD10	1.88967	-5.59141	4.19638	0.00276651	0.0175635	-1.45465	Red
ZNF562	1.88892	-5.5721	3.3941	0.00892532	0.0279757	-2.63665	Red
ENSG00000197991	1.88605	-6.1647	5.24044	0.000692156	0.0123071	-0.0576922	Red
ZNF19	1.88438	-5.40872	6.03511	0.000267219	0.0116642	0.891311	Red
BAZ1B	1.88387	-0.965419	0.694445	0.506349	0.568816	-6.30309	Gray
AOAH	1.88344	-5.96197	2.63505	0.0289867	0.0581697	-3.80885	Red
ENSG00000256500	1.88278	-5.00625	2.02391	0.0762602	0.118844	-4.73976	Gray
NET1	1.88201	-4.91528	2.42219	0.0406106	0.0736175	-4.13789	Red
ISOC1	1.8814	-5.51093	2.46033	0.0382271	0.070597	-4.07917	Red
MIR181A1HG	1.88066	-4.93086	4.05592	0.00337415	0.0191075	-1.65538	Red
RIPK2-DT	1.88026	-5.70173	3.9431	0.0039657	0.0196781	-1.81866	Red
SPATA18	1.88013	-5.42246	5.43133	0.000546424	0.0123071	0.179162	Red
ANO5	1.88004	-5.46132	4.60688	0.00157438	0.0148604	-0.885033	Red
ZFAND1	1.87981	-4.79945	3.19236	0.0121409	0.0330089	-2.94528	Red
ENSG00000264207	1.87923	-5.48181	3.00939	0.0161099	0.0395585	-3.22774	Red
RIN3	1.87852	-7.85497	5.81908	0.000343257	0.0116642	0.642873	Red
PTGS2	1.87738	-5.55666	1.86421	0.0979013	0.146178	-4.97202	Gray
SPIRE1	1.87524	-4.9614	4.32157	0.00232344	0.0168029	-1.27821	Red
LLGL2	1.87521	-4.39661	0.910911	0.387998	0.454485	-6.12647	Gray
ENSG00000280433	1.87497	-6.20821	2.21992	0.0559663	0.094296	-4.44671	Gray
ARG2	1.873	-5.84149	3.26808	0.0108108	0.0307911	-2.82904	Red
PNISR-AS1	1.87224	-5.85985	2.94317	0.0178605	0.0420792	-3.33038	Red
SLC7A6	1.87208	-5.61614	5.36079	0.000595958	0.0123071	0.0923005	Red
STIM1	1.87046	-5.55951	3.27958	0.0106225	0.030593	-2.81142	Red
GCNT1	1.87038	-4.50348	3.59939	0.00655915	0.0239606	-2.32659	Red
NAA40	1.86667	-6.07561	5.56556	0.000464129	0.0123071	0.342304	Red
ANKHD1	1.86662	-7.13259	3.24537	0.0111929	0.0314841	-2.86386	Red
ENSG00000291060	1.86544	-5.43556	3.73429	0.00537326	0.0219485	-2.12544	Red
HECTD4	1.86385	-6.1479	4.15985	0.00291233	0.0178095	-1.50658	Red
PPIL4	1.86369	-5.02324	2.78676	0.02282	0.0489561	-3.57326	Red
IPCEF1	1.86349	-5.25969	3.75364	0.00522281	0.0217819	-2.09678	Red
DUOXA1	1.86255	-5.27319	2.68709	0.0266998	0.0548731	-3.72809	Red
LINC00327	1.86196	-5.82207	4.58392	0.00162374	0.0148604	-0.916197	Red
C4orf36	1.85993	-6.4408	3.9165	0.00412076	0.0198481	-1.85742	Red
NBN	1.85907	-5.71106	2.08667	0.0690855	0.111349	-4.64676	Gray
ERI1	1.85729	-5.45807	4.1234	0.00306606	0.0182573	-1.55859	Red
ENSG00000285650	1.85664	-5.26664	3.51319	0.00745998	0.0255668	-2.45624	Red
SPAST	1.85653	-6.14513	4.75816	0.00128704	0.0147302	-0.68171	Red
ZNF391	1.85551	-6.01328	5.22679	0.000704096	0.0123071	-0.0748516	Red
TNS2-AS1	1.84929	-5.37318	4.50235	0.00181314	0.0152316	-1.02762	Red
RBBP7	1.84459	-5.02507	2.75567	0.023964	0.0505873	-3.62156	Red
ENPP4	1.84396	-5.4446	3.29179	0.0104265	0.0303195	-2.79274	Red
MAN2A2	1.84144	-7.54069	3.96197	0.0038595	0.0196565	-1.79122	Red
HCP5	1.84143	-5.61069	3.97167	0.00380612	0.0196565	-1.77715	Red
ZNF610	1.84063	-5.35287	3.21084	0.0118013	0.0324993	-2.91687	Red
ZNF286A	1.83792	-5.45239	4.92877	0.00102952	0.0141914	-0.456745	Red
KLK13	1.83712	-5.95381	3.78268	0.00500536	0.0214983	-2.05385	Red
ADGRL1-AS1	1.83372	-5.67941	3.59241	0.00662757	0.0241398	-2.33705	Red
LASTR	1.8334	-5.13791	3.02083	0.015826	0.0391337	-3.21003	Red
MAVS	1.83151	-5.84751	3.55814	0.00697495	0.0245809	-2.38853	Red
ADAM23	1.83103	-5.64445	4.09515	0.00319123	0.0186031	-1.59904	Red
COL4A4	1.82835	-5.42846	3.23432	0.011384	0.0319134	-2.88081	Red
SHTN1	1.82784	-5.31301	1.63244	0.139815	0.194882	-5.29482	Gray
SNX18	1.82748	-6.22931	4.10517	0.00314618	0.01847	-1.58467	Red
JKAMP	1.82615	-4.21742	1.75078	0.116683	0.169357	-5.1324	Gray
ENSG00000205740	1.82461	-5.32755	2.63072	0.0291859	0.0584422	-3.81558	Red
ENSG00000286136	1.82095	-5.54196	3.1361	0.0132393	0.0347899	-3.03192	Red
SPATA33	1.81801	-5.92371	4.94267	0.00101115	0.0141576	-0.438621	Red
DNAJB12	1.8169	-6.44645	3.85278	0.00451913	0.020803	-1.95064	Red
ZNF737	1.81675	-5.85653	3.58224	0.00672866	0.0242152	-2.35231	Red
IGSF9B	1.81673	-5.61681	4.88874	0.00108447	0.0141953	-0.509113	Red
ZNF362	1.81475	-5.86922	4.83942	0.00115659	0.0142877	-0.57398	Red
SLC7A6OS	1.81373	-5.33614	4.52835	0.0017503	0.0150172	-0.991992	Red
SLC35A3	1.8123	-5.46988	2.91673	0.0186132	0.0431642	-3.37139	Red
LINC02298	1.8102	-5.1873	3.79774	0.00489638	0.0214324	-2.03162	Red
EPHA5	1.81003	-5.78256	3.66554	0.00594627	0.0229658	-2.22768	Red
APOBEC3F	1.80909	-5.64188	5.25016	0.00068379	0.0123071	-0.0454942	Red
NHIP	1.80838	-5.36363	2.87598	0.0198385	0.0450794	-3.43466	Red
USP12	1.80775	-8.28554	4.95275	0.000998051	0.014154	-0.425496	Red
SLC22A5	1.80764	-5.31968	4.01263	0.00358917	0.0195098	-1.71783	Red
THOC1-DT	1.80692	-5.20313	3.63315	0.00623841	0.0235118	-2.27605	Red
AGAP1	1.80568	-5.54816	2.79566	0.0225028	0.048636	-3.55942	Red
FLJ12825	1.80216	-5.20771	4.60575	0.00157676	0.0148604	-0.886555	Red
IDE	1.80009	-5.57951	2.60632	0.0303343	0.0602102	-3.85342	Red
RIPOR2	1.80002	-4.94397	3.60401	0.00651419	0.0239017	-2.31966	Red
ACKR2	1.79935	-6.29851	3.21729	0.011685	0.0322857	-2.90696	Red
ENSG00000285872	1.79912	-5.21113	3.34053	0.00968077	0.0290656	-2.71826	Red
SNAPC5	1.7986	-5.51621	2.38428	0.0431278	0.0771908	-4.19614	Red
HEYL	1.79574	-5.5615	3.78937	0.00495663	0.0214432	-2.04397	Red
ZNF225-AS1	1.79524	-5.08114	4.28522	0.00244365	0.0171498	-1.3292	Red
MCOLN2	1.79469	-5.1724	2.96048	0.0173845	0.0413545	-3.30352	Red
POU2F3	1.79103	-5.45513	3.26847	0.0108043	0.0307911	-2.82844	Red
ASTE1	1.79051	-5.62016	2.80354	0.0222258	0.048431	-3.54718	Red
ENSG00000274776	1.78856	-5.76068	4.10916	0.00312846	0.0184092	-1.57896	Red
ENSG00000291078	1.78855	-5.10803	2.85846	0.0203905	0.0458328	-3.46186	Red
ANKEF1	1.78817	-5.37046	2.9219	0.0184635	0.0429291	-3.36337	Red
FBXO30	1.78732	-6.00606	3.27737	0.0106584	0.0306016	-2.81481	Red
ENSG00000274874	1.78683	-4.91832	2.79061	0.0226822	0.0487905	-3.56727	Red
FLJ30679	1.7864	-5.73273	3.87512	0.00437502	0.0205182	-1.91791	Red
TMEM41A	1.78188	-5.30635	4.30203	0.00238724	0.0169201	-1.30559	Red
BRCA1	1.7809	-4.3168	2.01628	0.0771807	0.119675	-4.75101	Gray
ABHD2	1.78046	-4.4769	1.97469	0.0823867	0.126418	-4.81206	Gray
TASP1	1.77989	-4.33292	1.17723	0.271715	0.33812	-5.85762	Gray
UBE3A	1.77676	-6.34616	3.96196	0.00385955	0.0196565	-1.79124	Red
SLC20A1	1.77369	-5.51973	2.54621	0.033362	0.0647768	-3.94651	Red
SLC19A1	1.77327	-5.46067	3.78959	0.00495506	0.0214432	-2.04365	Red
ADGRG5	1.77307	-5.59049	3.46641	0.00800273	0.0265163	-2.52692	Red
C14orf28	1.76994	-5.32823	2.94154	0.017906	0.042107	-3.33291	Red
SYT6	1.76825	-5.43403	3.88035	0.00434199	0.0204788	-1.91025	Red
GARNL3	1.76738	-5.82443	3.58706	0.00668062	0.0242074	-2.34509	Red
ENSG00000288045	1.76598	-5.53683	4.31573	0.00234232	0.0168904	-1.28639	Red
IST1	1.76419	-5.34738	2.51964	0.0347966	0.0670406	-3.98761	Red
INTS7	1.76379	-6.03049	4.70855	0.00137445	0.0147608	-0.747983	Red
GOLGA5	1.76307	-4.5873	1.55247	0.157744	0.215419	-5.40133	Gray
FAM8A1	1.7627	-5.6526	4.64384	0.00149827	0.0148604	-0.835017	Red
KCNA1	1.76251	-6.91332	3.45227	0.00817496	0.0267512	-2.54835	Red
LNCOC1	1.76141	-6.79511	3.49996	0.00760943	0.0258306	-2.47621	Red
EXOC2	1.76101	-5.54208	3.72245	0.00546763	0.0222178	-2.14301	Red
KLF6	1.76053	-3.14708	0.717394	0.492799	0.557864	-6.28632	Gray
ADH6	1.75985	-5.3617	4.22926	0.00264198	0.0175312	-1.40809	Red
VTI1A	1.75941	-5.96843	5.6729	0.000408049	0.0116642	0.470761	Red
ENSG00000288049	1.75892	-5.43102	2.3062	0.0488142	0.0849905	-4.31561	Red
VGLL3	1.75559	-4.10107	1.11524	0.295953	0.363388	-5.92479	Gray
DNAAF11	1.75303	-5.75235	2.53427	0.0339995	0.0656903	-3.965	Red
RNF130	1.75159	-5.1122	2.92301	0.0184315	0.042898	-3.36165	Red
NIBAN1	1.75084	-6.21916	3.08383	0.014353	0.0369184	-3.1126	Red
TESMIN	1.74921	-5.606	4.89943	0.0010695	0.0141953	-0.495109	Red
CCDC200	1.74903	-5.53405	3.4276	0.00848476	0.0272216	-2.58576	Red
WDFY2	1.74872	-7.12987	3.14232	0.013113	0.0345845	-3.02233	Red
SLC16A1	1.74522	-3.9652	1.09049	0.306103	0.372913	-5.95087	Gray
IKBKB	1.74359	-5.64469	2.36325	0.0445909	0.0791845	-4.22839	Red
GIT2	1.74357	-5.40605	3.7092	0.00557529	0.0225086	-2.16269	Red
MRPS35	1.74039	-5.55791	3.4447	0.00826869	0.0269678	-2.55981	Red
NFKB1	1.73913	-6.44967	2.27444	0.0513351	0.0881494	-4.36399	Gray
CDKL3	1.73903	-5.25787	3.25486	0.0110315	0.0312763	-2.8493	Red
F5	1.73601	-5.36112	3.58818	0.0066695	0.0242074	-2.34341	Red
PKP4	1.73398	-6.69326	3.1671	0.0126218	0.0337393	-2.98415	Red
ENSG00000290853	1.73137	-5.74795	3.92289	0.00408294	0.0197805	-1.8481	Red
CCDC6	1.73117	-6.35873	5.23815	0.000694142	0.0123071	-0.0605661	Red
C4B	1.72964	-5.37271	4.07267	0.00329471	0.0189408	-1.6313	Red
ENSG00000276166	1.72877	-6.68913	2.46097	0.0381885	0.070578	-4.07819	Red
DNAJC11	1.7269	-5.83876	3.32806	0.00986609	0.0293746	-2.7373	Red
FBXO48	1.72673	-5.00609	3.36357	0.00934797	0.0284259	-2.68313	Red
DNAJC27-AS1	1.72349	-5.58799	4.08925	0.00321804	0.018684	-1.6075	Red
DST	1.71973	-3.74024	1.41178	0.19434	0.254396	-5.58149	Gray
RRH	1.7162	-5.05385	3.13223	0.0133186	0.0349054	-3.03788	Red
ZNF526	1.71478	-6.69159	5.23699	0.000695149	0.0123071	-0.0620212	Red
NBAT1	1.71466	-6.3457	4.06559	0.00332804	0.0189909	-1.64147	Red
IRX5	1.71452	-5.82795	4.19967	0.00275378	0.0175635	-1.44999	Red
LINC02169	1.71243	-5.45335	2.75799	0.0238764	0.0504844	-3.61795	Red
IRS1	1.71191	-4.71133	1.67505	0.131039	0.185551	-5.23696	Gray
SLC37A3	1.71174	-5.66901	3.3884	0.00900269	0.0280728	-2.64532	Red
KCNQ3	1.71145	-5.98929	4.39907	0.00208787	0.0160744	-1.17016	Red
ENSG00000289342	1.71013	-5.40967	3.38459	0.00905483	0.0280992	-2.65112	Red
SELL	1.70965	-5.55411	4.34865	0.00223802	0.0163271	-1.24035	Red
AGAP4	1.70932	-6.04515	2.77109	0.0233891	0.0497493	-3.59759	Red
ENSG00000233230	1.70919	-5.16317	3.22916	0.0114744	0.0320229	-2.88874	Red
SLC2A12	1.70633	-6.05059	2.46247	0.0380973	0.0704616	-4.07586	Red
ANKRD13C	1.70378	-5.85552	2.71271	0.0256419	0.0532694	-3.68829	Red
ENSG00000286634	1.70201	-5.78217	3.77616	0.00505331	0.0215521	-2.06347	Red
ZNF208	1.70048	-6.03268	4.38624	0.00212501	0.0160744	-1.18798	Red
UPF3A	1.70044	-4.87623	2.05211	0.0729511	0.115417	-4.69808	Gray
RABL2B	1.69812	-5.87898	3.59973	0.0065558	0.0239606	-2.32608	Red
C21orf91	1.69773	-5.05705	2.32381	0.04747	0.0829395	-4.28874	Red
SLC25A48	1.69743	-5.2766	2.85368	0.020544	0.0460651	-3.46929	Red
LDHD	1.69708	-6.06192	2.5757	0.0318401	0.0623068	-3.90086	Red
LNCATV	1.69468	-6.07114	2.5046	0.0356358	0.0679272	-4.01085	Red
SLC25A16	1.69428	-5.87932	4.03606	0.00347102	0.0192877	-1.68399	Red
SNX22	1.69405	-5.17193	4.63264	0.00152091	0.0148604	-0.850156	Red
ZFYVE27	1.69351	-5.19344	2.53943	0.0337226	0.0653245	-3.95701	Red
STARD7-AS1	1.69246	-5.6448	3.95703	0.00388704	0.0196565	-1.79841	Red
ENSG00000262119	1.69046	-5.45211	4.01388	0.00358272	0.0195098	-1.71601	Red
NHS	1.68899	-5.1573	2.79678	0.0224632	0.048636	-3.55768	Red
ENSG00000267248	1.68839	-5.31225	2.21189	0.0566825	0.0951061	-4.45885	Gray
ENSG00000249388	1.68657	-5.9795	2.79628	0.0224809	0.048636	-3.55846	Red
LINC01013	1.68572	-6.02597	3.31339	0.0100887	0.029824	-2.7597	Red
BMS1P1	1.68559	-5.62335	3.28951	0.0104628	0.0303896	-2.79622	Red
ABCC4	1.68445	-6.11381	4.54683	0.00170706	0.0150172	-0.966727	Red
PTPRD-AS1	1.68409	-5.8524	3.49297	0.00768958	0.0259966	-2.48675	Red
UBR1	1.6837	-5.45883	3.1072	0.0138436	0.0359414	-3.07651	Red
ADAM28	1.68352	-5.89179	3.55716	0.00698512	0.0245809	-2.39	Red
ENSG00000280347	1.6822	-5.83094	3.97664	0.00377903	0.0196565	-1.76993	Red
H2BU1	1.68167	-6.98176	4.79278	0.00122962	0.0144453	-0.635686	Red
ZKSCAN2	1.68083	-5.55278	3.51795	0.0074069	0.0254548	-2.44905	Red
LINC02018	1.68076	-6.0579	3.42456	0.00852378	0.0272992	-2.59037	Red
SHCBP1	1.68046	-5.74598	3.86336	0.00445024	0.0205879	-1.93513	Red
IKBIP	1.67794	-6.02103	2.62244	0.0295704	0.0589283	-3.82841	Red
GALNT7	1.67373	-6.49103	2.96604	0.0172344	0.0412667	-3.2949	Red
ATG4C	1.67318	-5.1597	3.52246	0.00735701	0.0253532	-2.44224	Red
TMEM106C	1.67248	-5.18877	2.10243	0.06739	0.109394	-4.62328	Gray
ATXN2L	1.67159	-6.36483	3.63029	0.00626488	0.0235405	-2.28032	Red
SFXN5	1.67154	-5.44138	3.90293	0.00420234	0.0200859	-1.87722	Red
RAB33B	1.67151	-6.80663	4.87917	0.00109807	0.0141953	-0.521666	Red
TMEM14B	1.66851	-8.02849	3.70271	0.00562878	0.0225846	-2.17233	Red
TCF20	1.66432	-5.70628	3.16824	0.0125997	0.0337393	-2.9824	Red
CC2D2B	1.66318	-6.27312	4.56314	0.00166988	0.0149332	-0.94449	Red
GATA6-AS1	1.66243	-5.55156	3.49126	0.00770937	0.0260282	-2.48934	Red
KCTD13	1.6608	-6.3136	2.3709	0.044053	0.0783967	-4.21666	Red
ENSG00000236740	1.65971	-5.99256	2.89556	0.0192398	0.044179	-3.40425	Red
LAMB4	1.65704	-5.08431	3.37906	0.00913095	0.0281952	-2.65953	Red
RNF44	1.65676	-6.21575	2.16888	0.060674	0.10012	-4.52371	Gray
TRRAP	1.65598	-6.44984	3.48586	0.0077722	0.0260991	-2.49751	Red
MOB1A	1.65434	-5.21804	1.41852	0.192428	0.252158	-5.57308	Gray
FARSB	1.65385	-5.26521	3.06951	0.0146748	0.0374756	-3.13472	Red
PTHLH	1.65313	-5.85778	3.51876	0.007398	0.0254548	-2.44784	Red
SETX	1.65224	-5.45649	3.36814	0.00928335	0.02835	-2.67616	Red
ENSG00000258938	1.65116	-5.26911	2.72629	0.0250988	0.0524028	-3.6672	Red
SLC9B2	1.65061	-6.55971	4.88454	0.00109042	0.0141953	-0.514623	Red
SULT4A1	1.65027	-6.46391	3.33739	0.009727	0.0291693	-2.72305	Red
ZNF432	1.65023	-5.68571	4.24897	0.00257021	0.0174258	-1.38025	Red
RNF32-DT	1.64581	-5.75652	3.37595	0.00917406	0.0282558	-2.66427	Red
CBX5	1.64525	-6.13886	2.34469	0.0459235	0.0811467	-4.25681	Red
THOC3	1.64357	-5.71128	2.2995	0.0493352	0.0857182	-4.32582	Red
STIMATE	1.64319	-5.77561	2.43815	0.0395954	0.0722682	-4.11333	Red
STXBP5-AS1	1.64281	-5.7816	3.74707	0.00527335	0.0218565	-2.1065	Red
GIPC2	1.64241	-5.8117	4.76924	0.00126836	0.0146507	-0.666962	Red
ZNF516-AS1	1.64232	-5.94435	2.92496	0.0183755	0.0428676	-3.35862	Red
SOWAHC	1.63667	-6.63639	2.78413	0.0229145	0.0491166	-3.57734	Red
ANP32A	1.63631	-4.49775	1.02879	0.332587	0.399136	-6.01396	Gray
GPRC5A	1.63504	-8.53477	3.30246	0.0102582	0.030111	-2.77642	Red
TREML2	1.63421	-6.52303	2.20343	0.057447	0.0958869	-4.47164	Gray
HMGN2P46	1.63358	-5.87315	3.25191	0.0110815	0.0312763	-2.85383	Red
LRRC25	1.63321	-5.2431	3.21375	0.0117487	0.0324259	-2.91241	Red
RBAK	1.63292	-5.13885	2.7776	0.023151	0.0495287	-3.58749	Red
LINC02910	1.6328	-7.27414	5.21878	0.000711198	0.0123225	-0.084922	Red
MAB21L3	1.63259	-5.28446	3.86452	0.00444279	0.0205879	-1.93344	Red
AGO4	1.63194	-6.3525	3.35665	0.00944659	0.0286035	-2.69367	Red
TRPM7	1.63185	-5.73437	2.07517	0.0703489	0.11273	-4.66386	Gray
ERVMER34-1	1.63177	-5.63081	3.07165	0.0146262	0.0374432	-3.13141	Red
MTMR1	1.63031	-6.14254	3.68673	0.00576304	0.0227153	-2.19611	Red
KCNAB2	1.62849	-5.6958	5.24617	0.000687213	0.0123071	-0.0505034	Red
NCBP2	1.62643	-5.4966	2.51912	0.0348255	0.0670445	-3.98842	Red
ZNF420	1.62639	-5.06542	3.49308	0.00768835	0.0259966	-2.48659	Red
ABCB9	1.62552	-5.85988	2.84082	0.0209624	0.0464899	-3.48926	Red
SHROOM2	1.62402	-5.18617	3.53628	0.00720646	0.0250419	-2.42142	Red
GTF2A1	1.62319	-5.69903	2.47858	0.0371368	0.0693339	-4.05103	Red
ST8SIA2	1.6225	-6.06142	3.44106	0.00831414	0.0270453	-2.56533	Red
GPD1L	1.62018	-5.61605	3.86977	0.00440904	0.0205618	-1.92573	Red
SUPV3L1	1.61974	-5.66562	2.22009	0.0559515	0.094296	-4.44645	Gray
TLR4	1.6183	-5.72945	4.80832	0.00120475	0.0144453	-0.615095	Red
USP44	1.61827	-6.73745	3.82982	0.00467261	0.021076	-1.98438	Red
KALRN	1.61458	-5.74849	4.02575	0.00352246	0.0194762	-1.69887	Red
CCDC26	1.61405	-6.1774	2.56467	0.0324008	0.0631563	-3.91794	Red
ENSG00000287918	1.61383	-5.2631	3.18629	0.0122547	0.0331261	-2.95461	Red
ENSG00000286373	1.61364	-7.15881	4.56508	0.00166551	0.0149332	-0.941844	Red
DLEU7	1.61346	-6.63449	4.73198	0.00133239	0.0147608	-0.716632	Red
LIFR	1.61325	-4.87902	2.69199	0.026494	0.0545401	-3.72048	Red
CARD8	1.61244	-5.58093	2.93402	0.0181172	0.0424834	-3.34456	Red
LINC01778	1.61133	-5.48494	4.35172	0.00222854	0.0163056	-1.23606	Red
RAB11FIP1	1.61109	-6.46381	3.43617	0.00837572	0.0270756	-2.57275	Red
ENSG00000260136	1.60799	-6.531	4.42402	0.00201762	0.0159597	-1.13557	Red
ELF3-AS1	1.6074	-5.24212	3.37914	0.0091298	0.0281952	-2.65941	Red
ENSG00000273374	1.60732	-5.40057	2.7471	0.0242893	0.0510976	-3.63487	Red
C9orf40	1.60706	-5.61701	1.47717	0.176489	0.235476	-5.49897	Gray
NBEA	1.60643	-5.70959	3.45128	0.00818715	0.0267512	-2.54985	Red
YJU2B	1.60581	-5.15553	2.26242	0.0523224	0.0892588	-4.38227	Gray
UBE2N	1.60553	-3.52607	1.13671	0.28737	0.353719	-5.90182	Gray
ZNF484	1.6039	-6.14922	2.08111	0.0696935	0.111967	-4.65503	Gray
EXTL2	1.60355	-3.25275	0.645607	0.535948	0.596693	-6.33715	Gray
FRZB	1.60262	-4.97813	2.58934	0.0311603	0.0613946	-3.87974	Red
ZBTB11-AS1	1.6026	-6.03627	3.65244	0.00606263	0.0231643	-2.24723	Red
ENSG00000276434	1.60101	-5.63555	2.72213	0.0252642	0.0525723	-3.67367	Red
TTC7A	1.59844	-5.82336	4.52976	0.00174696	0.0150172	-0.990062	Red
RERE-AS1	1.59777	-5.69147	4.1241	0.00306305	0.0182573	-1.55759	Red
MAP10	1.59716	-5.28414	2.94839	0.0177155	0.0418224	-3.32227	Red
TFAP2B	1.59611	-5.92542	3.56637	0.00688979	0.0244176	-2.37615	Red
KHDC1-AS1	1.595	-6.50218	3.7491	0.0052577	0.0218565	-2.1035	Red
SLC24A4	1.59477	-6.65669	3.68227	0.00580109	0.0227574	-2.20275	Red
NEXN	1.59401	-7.37891	3.74547	0.00528577	0.0218565	-2.10887	Red
SLC6A1	1.59141	-6.87576	4.65579	0.00147454	0.0148473	-0.818901	Red
JARID2	1.59004	-8.94667	3.46546	0.00801424	0.0265193	-2.52837	Red
LINC01409	1.58837	-6.01612	3.93355	0.00402068	0.0196844	-1.83257	Red
RBM26	1.58824	-7.6608	3.3217	0.00996194	0.0294864	-2.74701	Red
TSNARE1	1.58803	-6.06993	1.04013	0.327588	0.394085	-6.00256	Gray
KDM6A	1.58427	-6.08826	1.83072	0.103127	0.15243	-5.0198	Gray
HPSE	1.58245	-6.19382	2.18216	0.0594134	0.098412	-4.50372	Gray
DPY19L4	1.58095	-7.45993	2.50318	0.0357162	0.0680244	-4.01305	Red
SLC45A2	1.58088	-6.53958	2.77932	0.0230885	0.049447	-3.58481	Red
CBLB	1.57933	-5.56353	3.7441	0.00529644	0.0218565	-2.11091	Red
ENSG00000235749	1.57896	-5.70306	3.02566	0.0157076	0.0389566	-3.20254	Red
ENSG00000235381	1.57773	-5.86822	3.90555	0.0041865	0.0200859	-1.87341	Red
C5orf63	1.57585	-5.02197	3.7236	0.00545837	0.0222164	-2.1413	Red
MOV10L1	1.57372	-6.12248	2.28079	0.0508205	0.0875671	-4.35432	Gray
SETD4	1.57355	-5.30967	2.06397	0.0716018	0.114013	-4.6805	Gray
SLC11A1	1.57347	-5.5142	2.83522	0.0211473	0.0466955	-3.49796	Red
INTS8	1.57115	-5.734	2.2193	0.0560214	0.094296	-4.44765	Gray
IP6K1	1.56828	-4.8502	2.18186	0.0594417	0.098412	-4.50418	Gray
PPFIA2	1.56821	-5.58823	3.19127	0.0121612	0.0330165	-2.94695	Red
MIRLET7A1HG	1.56814	-6.0775	3.14949	0.0129688	0.0343495	-3.01128	Red
ZMYM6	1.56725	-6.11593	3.40588	0.00876769	0.0276968	-2.61874	Red
MALINC1	1.56576	-5.79445	2.59953	0.0306615	0.0607629	-3.86393	Red
ENSG00000289261	1.56488	-5.66911	3.5159	0.00742974	0.0254982	-2.45215	Red
TAFA2	1.56443	-5.7328	2.98331	0.0167771	0.0405147	-3.26814	Red
GLUD1	1.56442	-0.737631	0.623628	0.549601	0.608905	-6.35175	Gray
TMEM198B	1.56396	-5.34432	2.18247	0.0593844	0.098412	-4.50326	Gray
CA11	1.5637	-5.64001	4.03922	0.00345539	0.0192438	-1.67943	Red
ABCC9	1.56104	-6.27898	4.17967	0.00283222	0.0176219	-1.47838	Red
GTF3C2-AS2	1.55992	-5.16446	3.6918	0.00572012	0.0226759	-2.18857	Red
E2F6	1.55833	-5.41573	3.43607	0.00837698	0.0270756	-2.5729	Red
ABRA	1.55711	-5.50946	2.66175	0.0277896	0.0565078	-3.76743	Red
FBXO45	1.55709	-4.63084	1.35581	0.210849	0.273424	-5.65031	Gray
LRRC70	1.55629	-5.65895	2.79781	0.0224268	0.048636	-3.55608	Red
RAPGEF3	1.55304	-7.39113	3.43543	0.00838506	0.0270756	-2.57387	Red
SETP14	1.55285	-6.44771	2.95985	0.0174017	0.0413545	-3.3045	Red
ZNF257	1.55247	-5.63364	2.38612	0.0430023	0.0770213	-4.19332	Red
ZNF470	1.55241	-5.48136	3.06763	0.0147175	0.037508	-3.13762	Red
RASAL2-AS1	1.55091	-6.53758	4.197	0.00276411	0.0175635	-1.45377	Red
URB2	1.54849	-5.87806	2.81281	0.0219047	0.0480249	-3.53278	Red
ENSG00000228084	1.54828	-6.34875	3.00347	0.0162588	0.0397469	-3.2369	Red
ENSG00000290476	1.54604	-6.122	3.43293	0.00841676	0.0270965	-2.57766	Red
TRIM44	1.54383	-4.84872	1.6176	0.142995	0.197987	-5.31479	Gray
PTGFR	1.54383	-5.6191	3.2251	0.011546	0.0320996	-2.89497	Red
ZNF230-DT	1.54366	-5.14651	2.74907	0.0242141	0.0509824	-3.63181	Red
STXBP4	1.54315	-7.06037	3.49017	0.00772196	0.0260355	-2.49098	Red
CCR5	1.54274	-5.46499	3.20166	0.0119687	0.0327075	-2.93098	Red
TMEM192	1.54269	-5.89191	2.99253	0.016538	0.0401577	-3.25385	Red
ENSG00000267731	1.54216	-5.4254	2.61886	0.0297385	0.0591215	-3.83397	Red
SPG7	1.54208	-5.73654	3.76618	0.00512769	0.0217209	-2.07822	Red
IREB2	1.54155	-5.15142	1.79389	0.109178	0.159764	-5.07194	Gray
RFX8	1.53927	-5.37495	3.80307	0.0048584	0.0213699	-2.02376	Red
SFXN2	1.53825	-6.0004	3.29685	0.0103463	0.0302473	-2.78499	Red
MBLAC2	1.53615	-5.20099	2.87602	0.0198372	0.0450794	-3.43459	Red
MFSD4A	1.53266	-5.89378	3.00317	0.0162666	0.0397469	-3.23738	Red
GLUD1P3	1.53192	-5.38588	2.58598	0.0313261	0.0615421	-3.88493	Red
GPR34	1.53175	-6.08676	2.49683	0.0360777	0.0682779	-4.02286	Red
STRADB	1.53141	-5.3743	3.14781	0.0130026	0.0344023	-3.01388	Red
EXTL3-AS1	1.53031	-5.68511	2.79378	0.0225694	0.0487116	-3.56234	Red
ZDHHC17	1.53017	-5.37423	3.39195	0.00895439	0.02798	-2.63991	Red
RNF150	1.53002	-6.44943	3.6917	0.00572096	0.0226759	-2.18871	Red
ANKRD52	1.52912	-5.27631	3.6137	0.00642111	0.0237698	-2.30515	Red
MAST4	1.52899	-6.59807	4.20102	0.00274855	0.0175635	-1.44806	Red
ERICD	1.52814	-5.84006	3.41298	0.00867413	0.0275687	-2.60795	Red
ZNF529	1.52434	-8.50941	3.83331	0.00464895	0.0210129	-1.97925	Red
GPR180	1.52348	-5.45929	2.21955	0.0559991	0.094296	-4.44727	Gray
ARSD	1.52142	-6.13605	3.39314	0.00893833	0.02798	-2.63811	Red
MTERF1	1.52031	-6.61953	1.71077	0.124075	0.177912	-5.1879	Gray
TMEM30A-DT	1.52019	-5.76343	3.57175	0.00683473	0.024353	-2.36807	Red
MIR29B2CHG	1.51983	-6.22391	4.41495	0.00204284	0.0160012	-1.14813	Red
LNX1	1.51954	-4.93954	2.0496	0.073241	0.115729	-4.70181	Gray
RRM2B	1.51763	-4.19735	1.04979	0.323379	0.389774	-5.99279	Gray
GALNT7-DT	1.51281	-7.38419	4.54316	0.00171556	0.0150172	-0.971743	Red
TMCC1	1.51236	-5.35589	3.5026	0.00757927	0.0257808	-2.47221	Red
USP24	1.50964	-5.57813	3.75278	0.0052294	0.0217819	-2.09805	Red
SMPDL3B	1.5093	-5.73802	3.94358	0.00396298	0.0196781	-1.81796	Red
NDFIP2	1.50819	-6.81915	3.61565	0.00640254	0.0237698	-2.30223	Red
PTOV1-AS1	1.50813	-5.34536	4.94807	0.00100411	0.014154	-0.431587	Red
LIPT2	1.50718	-7.00843	4.23154	0.00263356	0.0175219	-1.40486	Red
GPRASP1	1.50697	-5.96999	2.79606	0.0224887	0.048636	-3.5588	Red
PPP1R3F	1.50614	-6.11201	2.09407	0.0682838	0.110413	-4.63574	Gray
TAF3	1.50455	-5.73997	2.96856	0.017167	0.0411447	-3.291	Red
ZNF436	1.50289	-5.24234	4.21573	0.00269248	0.0175419	-1.42723	Red
RAP2C	1.50222	-8.68962	5.16816	0.00075798	0.0129532	-0.148869	Red
CCDC47	1.5022	-3.25542	1.00345	0.343961	0.411007	-6.03905	Gray
ZNF343	1.50141	-5.61795	2.49971	0.035913	0.0681998	-4.0184	Red
C21orf62-AS1	1.50117	-5.8383	3.77681	0.00504849	0.0215521	-2.06251	Red
PRXL2B	1.49944	-5.92236	3.79595	0.00490919	0.0214423	-2.03426	Red
KCNC4	1.49871	-5.54901	2.53261	0.0340888	0.0657785	-3.96756	Red
ZNF260	1.49621	-5.85975	3.47588	0.00788954	0.0263207	-2.51259	Red
HTATIP2	1.49483	-6.26019	3.06696	0.014733	0.0375089	-3.13867	Red
ENSG00000288046	1.49411	-5.84939	4.70544	0.00138015	0.0147608	-0.752157	Red
EFR3A	1.49367	-6.70409	2.87773	0.0197844	0.0450641	-3.43194	Red
ADAMTS6	1.49342	-4.07827	0.935015	0.376148	0.443102	-6.10435	Gray
APPBP2	1.49335	-6.4264	2.51386	0.0351169	0.0673974	-3.99655	Red
DOC2B	1.49241	-5.64348	2.92135	0.0184793	0.0429291	-3.36422	Red
ST3GAL6-AS1	1.49219	-5.58234	2.79645	0.0224747	0.048636	-3.55819	Red
STXBP5	1.48744	-7.24941	3.76697	0.00512176	0.0217209	-2.07705	Red
EPM2A	1.48679	-6.20504	3.42135	0.00856513	0.0273623	-2.59524	Red
ENSG00000286724	1.48677	-5.99508	4.70463	0.00138164	0.0147608	-0.753242	Red
EFCC1	1.48538	-5.65599	4.40114	0.00208195	0.0160744	-1.16729	Red
FBXO15	1.48352	-5.4023	3.63474	0.00622372	0.023492	-2.27367	Red
KCNQ5	1.48318	-5.39038	3.0369	0.0154358	0.0386282	-3.18514	Red
MCPH1	1.48256	-6.04374	4.08503	0.00323735	0.0187042	-1.61354	Red
YIPF4	1.48053	-3.82699	1.01861	0.337121	0.403801	-6.02409	Gray
LYRM4-AS1	1.47862	-6.20116	2.2933	0.0498225	0.0862942	-4.33527	Red
ENSG00000287087	1.47738	-6.03305	2.4905	0.0364413	0.0688275	-4.03262	Red
SLCO2A1	1.4755	-5.57324	4.58663	0.00161782	0.0148604	-0.91251	Red
ENSG00000289185	1.47358	-6.29082	3.00101	0.0163211	0.0397668	-3.24071	Red
BICDL1	1.47228	-8.486	4.02239	0.00353942	0.0194762	-1.70372	Red
AMZ1	1.47177	-6.23159	4.06048	0.00335232	0.0190525	-1.64882	Red
MROCKI	1.46899	-5.73397	3.46961	0.00796431	0.0264593	-2.52208	Red
ENSG00000285304	1.46811	-6.39241	3.06331	0.0148163	0.0375679	-3.1443	Red
H3-7	1.46701	-6.69943	3.70137	0.00563992	0.0225846	-2.17432	Red
RBFOX1	1.46351	-5.6051	2.8695	0.0200408	0.0452914	-3.44471	Red
HHIPL1	1.4635	-5.18839	2.37475	0.0437852	0.0780873	-4.21077	Red
ENSG00000279602	1.46266	-6.00728	3.0325	0.0155416	0.0387379	-3.19195	Red
ZDHHC11	1.4612	-5.50163	4.12354	0.00306547	0.0182573	-1.55839	Red
ENSG00000228395	1.46109	-6.89197	3.0463	0.0152125	0.0382922	-3.17061	Red
SFR1	1.461	-5.73064	2.58266	0.0314913	0.0617695	-3.89008	Red
DPYD	1.45967	-7.71779	3.96754	0.00382875	0.0196565	-1.78314	Red
LINC02519	1.45914	-5.17592	2.86266	0.0202568	0.0456143	-3.45534	Red
PTBP1	1.45897	-5.86048	1.64718	0.13672	0.191208	-5.27489	Gray
LINC01150	1.45862	-5.81462	3.38603	0.00903507	0.0280728	-2.64893	Red
TOP2B	1.45678	-6.31475	3.53736	0.0071948	0.0250419	-2.41979	Red
POFUT1	1.45533	-5.5644	3.57945	0.00675673	0.0242152	-2.3565	Red
ZNF566	1.45224	-6.15779	3.88702	0.00430022	0.0203587	-1.90049	Red
ZBTB3	1.45219	-5.75235	3.6996	0.00565467	0.0225846	-2.17696	Red
C1orf116	1.45112	-5.68307	3.03945	0.0153748	0.038553	-3.1812	Red
TRIM36	1.45085	-5.539	3.48042	0.00783595	0.0262426	-2.50573	Red
FGFBP3	1.4495	-6.1081	2.69201	0.0264929	0.0545401	-3.72044	Red
LINC01151	1.44842	-6.37234	3.68872	0.00574616	0.0227153	-2.19315	Red
C9orf64	1.44799	-6.41675	4.20754	0.00272356	0.0175419	-1.43883	Red
ERBIN	1.44797	-6.19384	3.57866	0.00676472	0.0242152	-2.35769	Red
GPR141	1.44596	-6.18442	3.00228	0.0162889	0.0397469	-3.23874	Red
RABL3	1.44546	-5.94701	2.95978	0.0174037	0.0413545	-3.30462	Red
ST3GAL3	1.44341	-6.07038	4.46741	0.00190143	0.0155035	-1.07565	Red
MYO10	1.44311	-5.74496	3.4845	0.00778809	0.0261173	-2.49957	Red
ABHD13	1.4429	-5.85481	2.33839	0.0463848	0.0815575	-4.26645	Red
ENSG00000245651	1.43961	-6.54759	2.03269	0.0752154	0.117583	-4.72681	Gray
ENSG00000279198	1.43939	-5.29043	3.80965	0.00481198	0.0213628	-2.01406	Red
ENSG00000289041	1.43859	-5.40451	2.59603	0.0308319	0.0609553	-3.86936	Red
BIRC5	1.43747	-5.71204	1.74849	0.117094	0.169756	-5.13558	Gray
ANTXR1	1.43374	-5.65144	2.15786	0.0617405	0.101542	-4.54028	Gray
ENSG00000288741	1.43311	-5.46418	3.76032	0.00517193	0.0217819	-2.0869	Red
DRGX	1.4323	-5.34689	2.96281	0.0173216	0.0413521	-3.29991	Red
ATP6V1C2	1.42958	-5.7959	2.25441	0.0529902	0.0901231	-4.39442	Gray
IRAIN	1.42954	-6.2768	1.71444	0.123379	0.177238	-5.18284	Gray
SIPA1L1-AS1	1.42851	-6.6792	2.95356	0.0175731	0.0416337	-3.31425	Red
RACGAP1	1.42651	-5.73045	2.05569	0.0725415	0.114915	-4.69278	Gray
POU6F2	1.42631	-5.92336	3.45339	0.00816115	0.0267512	-2.54665	Red
PPM1A	1.42574	-5.45179	2.3722	0.0439623	0.0783417	-4.21467	Red
ENSG00000280153	1.42466	-5.74299	3.80215	0.00486496	0.0213699	-2.02512	Red
SOD2-OT1	1.4233	-6.48736	2.49775	0.0360247	0.0682473	-4.02143	Red
TNFRSF9	1.42176	-5.99018	3.27295	0.0107308	0.0307385	-2.82159	Red
ENSG00000289076	1.42148	-7.64498	2.80946	0.02202	0.0481507	-3.53798	Red
FAM3C	1.41961	-2.07666	0.966636	0.361009	0.427285	-6.07463	Gray
RFX3	1.41893	-5.93719	3.69359	0.00570501	0.0226759	-2.1859	Red
CCDC65	1.41687	-5.54906	3.21083	0.0118014	0.0324993	-2.91688	Red
TNFSF18	1.41622	-7.29838	3.32372	0.00993141	0.0294864	-2.74392	Red
SF3A2	1.41597	-5.77124	2.99206	0.0165501	0.0401577	-3.25458	Red
METTL13	1.41444	-5.31013	2.06169	0.0718593	0.114243	-4.68388	Gray
ENSG00000287937	1.41444	-5.9143	2.79256	0.0226128	0.0487209	-3.56424	Red
HLF	1.40847	-5.99284	2.42133	0.040666	0.0736296	-4.13921	Red
SLC35F2	1.40512	-5.93196	3.26644	0.010838	0.0308332	-2.83155	Red
HFE	1.40297	-5.86321	3.13514	0.0132589	0.0347899	-3.03339	Red
ZFR	1.40118	-6.80804	2.70342	0.0260206	0.053832	-3.70273	Red
MIR181A2HG	1.40084	-5.46214	3.43357	0.00840863	0.0270965	-2.57669	Red
ARHGAP40	1.39795	-5.91547	2.84342	0.0208772	0.0464662	-3.48523	Red
FAM81A	1.39709	-6.10996	5.04472	0.000886709	0.014154	-0.306489	Red
STOX2	1.39614	-5.85457	4.38588	0.00212607	0.0160744	-1.18848	Red
ZNF518B	1.39411	-6.65613	2.90151	0.0190615	0.0439136	-3.39501	Red
SLC5A2	1.39352	-5.5512	3.36316	0.00935378	0.0284259	-2.68376	Red
ADRA2A	1.39319	-5.44892	3.95475	0.00389979	0.0196565	-1.80172	Red
MAGOH-DT	1.39279	-6.5718	3.23688	0.0113394	0.0318601	-2.87688	Red
RIOX2	1.39254	-5.60787	3.80351	0.0048553	0.0213699	-2.02311	Red
ARHGAP24	1.39205	-6.26091	2.06521	0.0714622	0.113929	-4.67866	Gray
CAND1	1.39196	-6.59196	4.2667	0.00250745	0.0172156	-1.35525	Red
GPR65	1.39061	-5.32357	3.22569	0.0115355	0.0320996	-2.89406	Red
NEXN-AS1	1.38943	-5.85345	4.55998	0.001677	0.0149433	-0.948787	Red
INKA2	1.38924	-5.27528	1.91341	0.0906767	0.136865	-4.90121	Gray
ATP1A1-AS1	1.38801	-6.87472	1.99778	0.0794556	0.122658	-4.77821	Gray
ENSG00000280219	1.38641	-5.78077	3.45217	0.00817614	0.0267512	-2.54849	Red
LINC00996	1.38631	-5.58779	4.35389	0.0022219	0.0163048	-1.23304	Red
NCAM1	1.38335	-5.59221	2.50163	0.0358038	0.0681089	-4.01543	Red
LRRC77P	1.38307	-5.8035	4.65909	0.00146805	0.0148473	-0.814453	Red
JPH2	1.38082	-5.48707	4.26604	0.00250975	0.0172156	-1.35618	Red
ZSCAN30	1.37955	-5.65707	3.69927	0.00565746	0.0225846	-2.17745	Red
SORBS2	1.37945	-6.136	2.51801	0.0348864	0.06711	-3.99013	Red
STAT5B	1.3793	-5.5836	2.48541	0.0367367	0.0690518	-4.04048	Red
FMN1	1.37746	-6.61533	3.46831	0.0079799	0.0264759	-2.52405	Red
UGGT2	1.3769	-5.51706	3.685	0.00577773	0.0227373	-2.19868	Red
AP3B2	1.3749	-5.95573	4.69162	0.00140574	0.0147988	-0.770688	Red
ENSG00000260267	1.37339	-5.44027	3.91132	0.00415175	0.0199588	-1.86498	Red
NECTIN1	1.37333	-5.35715	2.515	0.0350536	0.0673796	-3.99479	Red
STAT5A	1.37264	-5.22429	2.62085	0.029645	0.0590297	-3.83088	Red
ST7	1.37264	-5.15082	2.96531	0.0172543	0.0412746	-3.29604	Red
TIGD2	1.37241	-4.96249	2.79979	0.0223573	0.0485902	-3.55301	Red
PTGR3	1.372	-5.74023	2.8658	0.0201574	0.0455138	-3.45046	Red
SNTB1	1.36956	-6.29248	3.47942	0.00784773	0.0262468	-2.50724	Red
FKBP14-AS1	1.36944	-5.88999	3.58564	0.00669471	0.0242074	-2.34721	Red
FAT4	1.369	-6.34225	2.98585	0.0167108	0.0404398	-3.2642	Red
BRAF	1.36895	-5.86576	4.69198	0.00140508	0.0147988	-0.770216	Red
ENSG00000239415	1.36894	-5.74017	2.78809	0.0227723	0.0488958	-3.57119	Red
GABRA2	1.36868	-6.61446	4.04707	0.00341697	0.0192012	-1.66813	Red
RCCD1	1.36819	-8.8314	2.44163	0.0393778	0.0719263	-4.10798	Red
EPS15L1	1.36786	-7.32197	4.39425	0.00210175	0.0160744	-1.17686	Red
TXNRD2	1.36745	-4.92064	1.94942	0.0857126	0.130637	-4.84893	Gray
ENSG00000229321	1.3673	-6.21998	2.95302	0.0175879	0.0416337	-3.31509	Red
SLC16A9	1.36715	-5.2924	3.16718	0.0126203	0.0337393	-2.98403	Red
ARRDC3-AS1	1.36657	-6.07321	3.02918	0.015622	0.0388217	-3.1971	Red
UBOX5-AS1	1.36544	-5.40158	3.78473	0.00499034	0.0214983	-2.05081	Red
TNFRSF13C	1.36522	-5.35454	5.23022	0.000701074	0.0123071	-0.0705354	Red
NHEJ1	1.36418	-7.10895	2.6368	0.0289066	0.0581629	-3.80614	Red
ENSG00000276850	1.36117	-6.45874	3.8661	0.00443258	0.0205879	-1.93111	Red
NCBP1	1.36116	-6.38101	2.7771	0.0231691	0.0495287	-3.58826	Red
FAM218A	1.35978	-6.01805	2.21143	0.0567235	0.095111	-4.45954	Gray
ANKRD23	1.35967	-5.60173	2.6651	0.027643	0.0563015	-3.76223	Red
YTHDC1	1.35924	-8.15059	2.91265	0.0187325	0.0433558	-3.37773	Red
SIX1	1.35745	-5.97086	2.26641	0.0519926	0.0889722	-4.3762	Gray
ERVK3-1	1.35527	-7.82174	1.48554	0.174314	0.233197	-5.48826	Gray
TP73	1.35488	-8.34269	1.49256	0.172505	0.231647	-5.47924	Gray
BOLA2-SMG1P6	1.35486	-6.31735	3.30058	0.0102876	0.0301617	-2.77929	Red
ME2	1.35467	-7.07523	2.49651	0.0360956	0.0682779	-4.02334	Red
ALDH5A1	1.35465	-6.28623	3.99049	0.0037047	0.0196565	-1.74985	Red
HMGA2-AS1	1.35333	-6.6557	2.21618	0.0562986	0.0945255	-4.45236	Gray
FAM110D	1.35232	-6.01938	3.48661	0.00776338	0.0260991	-2.49637	Red
ATP9B	1.35206	-6.09515	3.67185	0.0058911	0.0228731	-2.21828	Red
FAR1	1.35195	-6.43649	2.19117	0.0585719	0.0972949	-4.49013	Gray
TTC28-AS1	1.3508	-6.20473	3.28795	0.0104877	0.0304266	-2.79861	Red
PTPN18	1.3505	-5.64271	3.37278	0.00921821	0.0282558	-2.66909	Red
PTPN20	1.34792	-6.16095	2.92466	0.0183841	0.0428676	-3.35909	Red
ING5	1.34711	-6.59805	4.58643	0.00161827	0.0148604	-0.912793	Red
ATE1	1.34666	-6.09642	3.67037	0.00590392	0.0228731	-2.22047	Red
KCNT2	1.34563	-5.74088	2.77022	0.0234215	0.0497756	-3.59896	Red
SYT11	1.3455	-5.46392	2.70222	0.0260699	0.0538892	-3.70459	Red
SLC25A40	1.34476	-5.53417	3.05736	0.0149536	0.0378389	-3.15349	Red
RGS6	1.34325	-5.97499	3.83979	0.0046053	0.0209409	-1.96972	Red
PREP	1.34247	-6.36069	1.67056	0.131938	0.186402	-5.24309	Gray
CCDC180	1.34229	-5.96003	3.0986	0.0140288	0.036293	-3.08978	Red
KATNAL2	1.34225	-5.63167	4.40548	0.00206957	0.0160744	-1.16127	Red
RGS5	1.3417	-6.26213	3.14041	0.0131516	0.0346496	-3.02527	Red
GRIA3	1.33502	-6.85657	2.26557	0.0520617	0.0890028	-4.37748	Gray
NECTIN3-AS1	1.33432	-5.41994	2.84686	0.0207648	0.0462987	-3.47988	Red
ENSG00000232006	1.33325	-6.17624	2.66966	0.0274446	0.0560678	-3.75515	Red
KSR2	1.33274	-5.42436	3.3046	0.0102247	0.0300834	-2.77314	Red
POC1B	1.33193	-6.36866	3.08855	0.0142484	0.0366872	-3.10529	Red
ESYT3	1.33118	-6.7924	3.04577	0.0152248	0.0382922	-3.17142	Red
ZNF689	1.33056	-6.12732	2.21823	0.0561166	0.094347	-4.44927	Gray
ENSG00000261103	1.3301	-4.91679	2.9916	0.016562	0.0401577	-3.2553	Red
IKZF2	1.32728	-5.70811	2.97401	0.0170218	0.0408752	-3.28255	Red
WDR35	1.32528	-7.37172	4.27819	0.00246764	0.0171498	-1.33907	Red
HIBCH	1.32297	-7.79725	1.1404	0.285913	0.352621	-5.89783	Gray
SLC25A32	1.31713	-5.80859	2.62962	0.029237	0.0584974	-3.81729	Red
HELZ	1.31513	-5.96188	2.19568	0.0581559	0.0967971	-4.48334	Gray
WSB2	1.31246	-5.8457	2.65988	0.0278718	0.0565828	-3.77034	Red
ENSG00000287925	1.31165	-5.46376	2.02485	0.0761478	0.118743	-4.73837	Gray
PUS10	1.311	-5.58219	2.29647	0.0495729	0.0860113	-4.33044	Red
TTC30B	1.31058	-5.47775	3.50913	0.00750547	0.0256265	-2.46236	Red
SP140	1.3105	-6.07218	4.18271	0.00282014	0.0176073	-1.47406	Red
ENSG00000151303	1.31014	-6.23929	2.34741	0.0457255	0.0809114	-4.25264	Red
DNAJC22	1.30968	-5.45742	2.97782	0.016921	0.0407509	-3.27664	Red
FOXB1	1.30939	-5.9468	3.55325	0.00702602	0.02469	-2.39588	Red
FASTKD1	1.30748	-6.05801	2.469	0.037705	0.0699954	-4.0658	Red
KLF8	1.30727	-5.56231	4.26354	0.00251852	0.0172156	-1.3597	Red
FAM224A	1.30694	-5.68099	4.26867	0.00250058	0.0172156	-1.35248	Red
MINDY3	1.30517	-5.44006	1.74557	0.117622	0.170323	-5.13966	Gray
SPECC1	1.30515	-5.69941	2.49963	0.0359177	0.0681998	-4.01853	Red
JCHAIN	1.30183	-6.18099	3.11767	0.0136213	0.0355494	-3.06034	Red
GOLGA7B	1.29785	-5.59204	2.82254	0.0215726	0.0474217	-3.51767	Red
ZFPM1	1.29764	-6.37203	3.17448	0.0124792	0.0336239	-2.97279	Red
ENSG00000279434	1.29734	-6.6365	1.85164	0.0998325	0.14844	-4.98999	Gray
ALDH1A3	1.29732	-7.14425	2.96226	0.0173364	0.0413521	-3.30076	Red
DLEU2	1.29615	-5.68939	3.39797	0.00887316	0.0278555	-2.63076	Red
IFFO2	1.29609	-5.35219	3.40292	0.00880702	0.0277443	-2.62323	Red
NHLRC1	1.29517	-5.77763	1.48605	0.17418	0.233153	-5.4876	Gray
ENSG00000285280	1.29342	-6.31826	3.45092	0.00819154	0.0267512	-2.55039	Red
ZNF395	1.2931	-6.50336	2.98048	0.0168512	0.040622	-3.27253	Red
LINC01424	1.2919	-5.84054	2.14027	0.063481	0.103859	-4.56668	Gray
TMEM199	1.29015	-5.45463	1.25177	0.244733	0.309326	-5.77347	Gray
ENSG00000283175	1.28797	-6.01469	3.81786	0.00475475	0.0212601	-2.00198	Red
PLD1	1.28725	-5.81725	3.75511	0.00521153	0.0217819	-2.09459	Red
MBNL3	1.28613	-5.9467	3.04271	0.0152973	0.0383971	-3.17616	Red
MEF2D	1.28606	-5.3983	1.09822	0.302902	0.369943	-5.94276	Gray
BRD1	1.28603	-5.50556	4.0888	0.00322008	0.018684	-1.60814	Red
MPZL3	1.28503	-6.50406	4.1648	0.00289209	0.0177752	-1.49953	Red
MTMR9	1.28405	-6.40328	2.1157	0.0659926	0.107405	-4.60346	Gray
GCSAM	1.28398	-5.54607	2.98624	0.0167006	0.0404398	-3.26359	Red
ENSG00000289685	1.28385	-6.71433	2.83487	0.0211591	0.0466955	-3.49851	Red
MINDY4	1.28335	-5.2456	1.51986	0.165631	0.224227	-5.44395	Gray
LRRC57	1.28291	-5.803	2.94958	0.0176827	0.0418183	-3.32043	Red
ENSG00000259915	1.28234	-5.64856	2.85178	0.0206053	0.0460651	-3.47224	Red
ELOVL7	1.28177	-6.81439	2.46366	0.0380259	0.0703818	-4.07404	Red
INSC	1.28153	-6.27586	2.15606	0.0619168	0.101633	-4.54299	Gray
ENSG00000254317	1.28078	-5.81945	2.66727	0.0275481	0.0561539	-3.75885	Red
ZIC4	1.28056	-5.67922	2.58159	0.0315446	0.0618254	-3.89174	Red
ZNF236	1.27896	-6.38756	4.91193	0.00105226	0.0141953	-0.478744	Red
H2BC6	1.2747	-7.14139	2.85189	0.0206016	0.0460651	-3.47207	Red
USP19	1.2741	-5.70487	1.73024	0.120424	0.173877	-5.16096	Gray
HULC	1.27345	-6.50983	2.50601	0.0355562	0.0679107	-4.00867	Red
FAM110A	1.26848	-5.04297	1.78606	0.110507	0.161425	-5.08297	Gray
LIN7A	1.26557	-5.44754	2.4713	0.0375677	0.0698446	-4.06225	Red
ITGA9	1.26314	-5.22769	2.15168	0.0623472	0.102205	-4.54957	Gray
MTUS1	1.26313	-10.9794	1.71601	0.123083	0.176999	-5.18067	Gray
ATXN7L1	1.26014	-6.19178	3.47577	0.00789094	0.0263207	-2.51277	Red
POGLUT1	1.25819	-5.94139	2.77591	0.0232127	0.0495287	-3.59012	Red
LINC02384	1.2575	-6.91647	3.50215	0.00758441	0.0257808	-2.47289	Red
ENSG00000230623	1.25327	-5.36931	3.22346	0.011575	0.0321116	-2.89749	Red
HOXC6	1.25286	-5.84877	3.47317	0.0079218	0.0263532	-2.5167	Red
MIR3150BHG	1.25255	-6.67925	1.69759	0.126604	0.180604	-5.20606	Gray
UST	1.25145	-6.2137	2.45013	0.0388507	0.0711692	-4.09489	Red
RHPN2	1.25113	-6.22563	3.86249	0.00445589	0.0205879	-1.93641	Red
GATD1-DT	1.24763	-6.42198	2.87736	0.0197957	0.0450641	-3.43251	Red
RBMX	1.24723	-3.6034	0.774501	0.460098	0.525684	-6.24253	Gray
AADACP1	1.24683	-5.97232	3.10447	0.013902	0.0360473	-3.08071	Red
IRF2BPL	1.24652	-5.00111	1.26356	0.240679	0.304974	-5.75985	Gray
FUT10	1.24502	-5.7107	2.35906	0.0448883	0.0795993	-4.2348	Red
GEN1	1.24437	-5.41508	1.83691	0.102141	0.151332	-5.01099	Gray
SNX33	1.24304	-5.31437	2.05898	0.0721668	0.114467	-4.6879	Gray
CALHM5	1.23864	-6.3688	1.97913	0.0818155	0.125819	-4.80556	Gray
SPTY2D1OS	1.23768	-5.5806	2.33033	0.046981	0.0823736	-4.27876	Red
SS18L1	1.23731	-6.1652	2.36135	0.0447259	0.0793677	-4.2313	Red
KRT222	1.2349	-5.37052	3.5776	0.00677539	0.0242186	-2.35928	Red
HPS5	1.23391	-5.77722	3.32224	0.0099538	0.0294864	-2.74618	Red
ARHGAP44	1.23347	-5.53863	2.21778	0.0561564	0.0943504	-4.44995	Gray
FBXW4	1.23219	-5.97213	2.15704	0.0618205	0.101542	-4.54151	Gray
SENP5	1.23121	-6.18328	1.83388	0.102623	0.151951	-5.01531	Gray
UBN1	1.23061	-6.20713	2.50817	0.0354347	0.0678508	-4.00533	Red
CASS4	1.22906	-5.5763	2.48483	0.0367707	0.0690518	-4.04138	Red
ENSG00000279267	1.22854	-5.84638	3.43515	0.00838854	0.0270756	-2.57429	Red
ZDBF2	1.22842	-7.02668	3.02579	0.0157046	0.0389566	-3.20235	Red
LIAS	1.2281	-5.37266	1.49396	0.172146	0.231539	-5.47744	Gray
LINC02019	1.22774	-6.12673	2.89471	0.0192652	0.044179	-3.40557	Red
CD209	1.22733	-6.44224	4.00622	0.00362219	0.0195253	-1.72709	Red
VPS8	1.22656	-5.5704	2.1679	0.0607687	0.100151	-4.52519	Gray
HNRNPUL2	1.22622	-5.45419	2.09331	0.0683658	0.110475	-4.63687	Gray
MLYCD	1.22553	-6.01933	2.46396	0.0380079	0.0703818	-4.07358	Red
WNK2	1.22496	-6.49566	3.65668	0.00602474	0.0230902	-2.2409	Red
HSDL1	1.22474	-5.83893	3.03318	0.0155252	0.0387379	-3.1909	Red
SH3RF2	1.22469	-5.81811	3.6129	0.00642872	0.0237698	-2.30635	Red
ENOX2	1.22401	-6.49424	2.45072	0.0388141	0.0711544	-4.09398	Red
ENSG00000286388	1.22218	-5.51963	3.39151	0.00896033	0.02798	-2.64058	Red
LINC01572	1.22143	-4.40344	2.02016	0.0767115	0.119283	-4.74529	Gray
HMGB1P1	1.22121	-6.14336	2.49837	0.0359896	0.0682326	-4.02048	Red
TRPM6	1.22015	-5.80995	3.33416	0.0097749	0.0291727	-2.72798	Red
THBD	1.21926	-7.21279	3.45347	0.00816021	0.0267512	-2.54653	Red
APAF1	1.21801	-6.29696	3.44325	0.00828683	0.0269917	-2.56202	Red
ARMC7	1.21801	-7.1497	2.54639	0.0333526	0.0647768	-3.94624	Red
ENSG00000237596	1.21391	-6.06691	2.15743	0.0617827	0.101542	-4.54093	Gray
VSIG10	1.21294	-5.97038	2.2873	0.0502992	0.0868488	-4.34442	Gray
ADGRB3	1.21286	-5.58245	3.20199	0.0119627	0.0327075	-2.93048	Red
TLCD3A	1.21228	-6.66311	2.77555	0.0232259	0.0495287	-3.59067	Red
LINC03021	1.21021	-5.86374	2.9828	0.0167905	0.0405147	-3.26893	Red
CCAR1	1.20963	-2.96441	0.615481	0.554713	0.614024	-6.35704	Gray
RNF41	1.20903	-5.52473	1.9704	0.0829429	0.127115	-4.81833	Gray
SUGT1P3	1.20886	-7.02002	1.7015	0.125849	0.17963	-5.20068	Gray
WWC2	1.20671	-5.83988	1.94637	0.0861234	0.131023	-4.85338	Gray
SLCO3A1	1.20553	-6.61437	3.37515	0.00918514	0.0282558	-2.66548	Red
TMEM229B	1.20399	-6.77243	3.32165	0.00996275	0.0294864	-2.74709	Red
STAMBP	1.19956	-5.46413	1.43025	0.189145	0.24877	-5.55841	Gray
VCPIP1	1.19939	-6.25234	2.5681	0.0322255	0.0629622	-3.91263	Red
DNAH9	1.1989	-5.90838	2.36889	0.0441941	0.0785358	-4.21975	Red
CASTOR3	1.19714	-5.59581	2.38048	0.0433889	0.0774962	-4.20198	Red
ETV1	1.19586	-6.11548	2.4416	0.0393793	0.0719263	-4.10802	Red
LNX2	1.19322	-5.78117	2.66024	0.0278556	0.0565828	-3.76976	Red
ATP4B	1.18936	-5.52591	3.84753	0.00455375	0.0208756	-1.95835	Red
LINC02940	1.18704	-5.44994	2.25748	0.0527335	0.089809	-4.38977	Gray
BHMT2	1.18638	-5.77908	3.75446	0.00521656	0.0217819	-2.09557	Red
ATF2	1.18576	-4.29044	0.827658	0.430986	0.495763	-6.19919	Gray
MRM3	1.18553	-5.81815	2.20319	0.0574684	0.0958869	-4.47199	Gray
ADAMTSL5	1.18507	-5.77208	2.01959	0.0767808	0.119283	-4.74614	Gray
KCNE3	1.18475	-5.65695	2.03651	0.0747645	0.117172	-4.72116	Gray
USP50	1.18371	-6.94725	3.88748	0.00429737	0.0203587	-1.89982	Red
ENSG00000291142	1.18141	-5.94058	1.17245	0.273523	0.34003	-5.86288	Gray
ENSG00000237614	1.18092	-5.57255	2.63469	0.0290032	0.0581697	-3.80941	Red
TMC6	1.17951	-5.03329	1.30051	0.228327	0.291842	-5.71657	Gray
HDX	1.1767	-6.34633	3.03014	0.0155988	0.0388025	-3.19561	Red
CATSPERG	1.17575	-5.63931	3.08923	0.0142334	0.0366863	-3.10424	Red
TNFRSF13B	1.17407	-5.28191	4.0683	0.00331525	0.0189714	-1.63758	Red
TMEM67	1.17315	-6.3655	3.42732	0.00848834	0.0272216	-2.58618	Red
CEP83-DT	1.173	-7.87896	2.37018	0.0441034	0.0784305	-4.21776	Red
ZC3H12B	1.172	-5.77434	2.79532	0.0225149	0.048636	-3.55995	Red
GFI1	1.17181	-6.60173	2.4843	0.0368012	0.0690518	-4.04219	Red
NUDT21	1.17116	-4.44539	1.03446	0.330082	0.39632	-6.00828	Gray
TGIF2	1.1666	-6.61936	1.53472	0.161995	0.2205	-5.42459	Gray
ENSG00000235795	1.16603	-6.87485	2.85123	0.0206231	0.0460651	-3.4731	Red
LNC-LBCS	1.16599	-6.4652	2.00992	0.0779564	0.120658	-4.76038	Gray
MYO3B	1.16586	-5.60566	2.4051	0.0417271	0.075214	-4.16418	Red
KLC1	1.16546	-6.09132	4.08477	0.00323856	0.0187042	-1.61392	Red
LYSMD1	1.16505	-5.92537	2.70939	0.0257767	0.053416	-3.69346	Red
LINC02889	1.16286	-6.57093	3.09821	0.0140372	0.036293	-3.09038	Red
LINC02154	1.16219	-5.77297	2.87208	0.0199601	0.04515	-3.44071	Red
ENSG00000217576	1.16206	-5.00931	1.94943	0.0857117	0.130637	-4.84893	Gray
TBC1D9B	1.16097	-6.19889	2.48296	0.0368798	0.0691291	-4.04427	Red
HR	1.1602	-6.07265	2.19986	0.0577726	0.0962801	-4.47703	Gray
TMEM215	1.16019	-5.28241	2.76913	0.0234614	0.0498181	-3.60064	Red
MCMDC2	1.15913	-6.74072	3.6574	0.00601825	0.0230902	-2.23982	Red
CCDC93	1.15796	-5.9339	2.64795	0.0284018	0.0573784	-3.78884	Red
ENSG00000234810	1.15792	-6.86533	2.01721	0.0770679	0.119595	-4.74964	Gray
HSPA4L	1.15706	-6.1408	1.69342	0.127414	0.181448	-5.21179	Gray
SYNE3	1.15641	-6.5431	2.63593	0.0289464	0.0581697	-3.80749	Red
USP6NL	1.15635	-6.17239	1.16366	0.276878	0.343175	-5.87254	Gray
PPM1L-DT	1.1558	-5.3705	3.12032	0.0135657	0.0354784	-3.05625	Red
MIR210HG	1.15513	-6.1597	2.63089	0.0291783	0.0584422	-3.81532	Red
ZKSCAN4	1.15141	-6.33319	1.74184	0.118298	0.171203	-5.14485	Gray
POLR2M	1.15062	-6.15064	1.5521	0.157833	0.215423	-5.40183	Gray
GRIN3A	1.15009	-8.40239	3.07905	0.0144596	0.0371542	-3.11998	Red
LINC01138	1.15002	-6.02244	2.60851	0.0302294	0.0600497	-3.85003	Red
ARRDC4	1.14948	-6.15301	2.56543	0.032362	0.0631299	-3.91677	Red
ATXN1	1.148	-6.6608	2.40472	0.041752	0.075214	-4.16476	Red
ENSG00000291171	1.14659	-5.83942	2.46983	0.0376553	0.0699553	-4.06452	Red
HPS4	1.14653	-5.48933	1.66266	0.133537	0.187915	-5.25386	Gray
FBXW10B	1.14613	-6.37702	3.67925	0.005827	0.0227874	-2.20724	Red
H2BC5	1.1456	-5.67827	2.08452	0.06932	0.111583	-4.64996	Gray
ENSG00000233393	1.14475	-5.8358	2.8288	0.0213614	0.0469988	-3.50793	Red
FAT3	1.14204	-7.17174	2.66241	0.0277606	0.0564949	-3.76641	Red
GRB10	1.14102	-6.3143	2.12364	0.0651704	0.106275	-4.59158	Gray
MMP25-AS1	1.1399	-6.40102	1.86374	0.0979719	0.146196	-4.97268	Gray
FZD2	1.1385	-4.34252	1.16845	0.275047	0.341584	-5.86729	Gray
MDN1	1.13805	-6.25014	2.20291	0.0574937	0.0958869	-4.47241	Gray
TMEM68	1.13754	-5.76349	2.99345	0.0165143	0.0401577	-3.25243	Red
TUG1	1.13717	-8.06524	2.26533	0.0520818	0.0890028	-4.37785	Gray
ITGA2	1.13703	-6.20799	2.07124	0.0707864	0.113163	-4.66971	Gray
LINC01002	1.13662	-6.16203	2.99876	0.0163783	0.0398672	-3.24419	Red
TIFAB	1.13588	-6.5347	3.40489	0.00878082	0.0276968	-2.62024	Red
WBP2NL	1.13579	-8.32544	3.05248	0.0150673	0.0380494	-3.16105	Red
SHQ1	1.13534	-5.60814	3.14641	0.0130306	0.0344401	-3.01603	Red
LINC02785	1.13515	-5.34955	2.87477	0.0198762	0.0451234	-3.43654	Red
ENTPD5	1.13476	-6.03523	1.96749	0.0833217	0.127538	-4.82258	Gray
ENSG00000285796	1.13431	-7.14999	3.35149	0.00952094	0.0287588	-2.70155	Red
DNHD1	1.13394	-5.72601	2.76616	0.0235715	0.0500092	-3.60526	Red
SUGT1-DT	1.13153	-6.43094	3.29488	0.0103774	0.0302473	-2.78801	Red
VRK2	1.13061	-5.20154	1.55076	0.15815	0.215737	-5.40359	Gray
GPR160	1.13035	-6.48596	3.03707	0.0154318	0.0386282	-3.18488	Red
MCOLN3	1.12835	-5.66867	1.6968	0.126757	0.18072	-5.20715	Gray
MTARC2	1.126	-5.69805	2.04522	0.0737476	0.116071	-4.70829	Gray
RGS20	1.12527	-5.9107	3.1122	0.0137369	0.0357761	-3.06878	Red
SGIP1	1.12317	-5.52186	2.07633	0.0702215	0.112598	-4.66215	Gray
KLF12	1.11541	-5.70662	1.95312	0.085218	0.130042	-4.84355	Gray
ZBTB7C	1.11506	-5.3318	1.97665	0.0821339	0.126185	-4.80919	Gray
FMNL3	1.115	-6.65292	3.82876	0.00467981	0.021076	-1.98593	Red
ENSG00000282860	1.11227	-5.85935	2.27066	0.0516436	0.0884357	-4.36974	Gray
CCDC102B	1.11008	-7.28205	3.0026	0.0162808	0.0397469	-3.23825	Red
MYOSLID	1.1093	-6.05154	2.4655	0.0379146	0.0702801	-4.07119	Red
RBM41	1.1092	-6.14331	2.84589	0.0207964	0.0463277	-3.48139	Red
ST6GALNAC6	1.10838	-1.57211	0.43405	0.6753	0.722424	-6.4581	Gray
MSANTD2-AS1	1.10824	-6.39921	3.38038	0.00911275	0.0281952	-2.65753	Red
TMEM108	1.10675	-5.69857	3.60093	0.00654416	0.0239606	-2.32429	Red
ENSG00000289189	1.10625	-6.27501	3.93911	0.00398859	0.0196844	-1.82447	Red
ZKSCAN1	1.10601	-6.139	2.18598	0.0590554	0.0979675	-4.49797	Gray
ANGPT1	1.10421	-6.30898	2.66754	0.0275365	0.0561539	-3.75844	Red
ANAPC4	1.10161	-6.58031	2.70836	0.0258185	0.0534583	-3.69505	Red
LINC01915	1.09891	-7.00867	2.93258	0.0181581	0.0425393	-3.3468	Red
ITGA8	1.09888	-6.63343	2.05814	0.0722618	0.114545	-4.68914	Gray
BACH2	1.09868	-6.29552	2.02518	0.0761091	0.118743	-4.73789	Gray
CADM2	1.09674	-5.32807	2.37179	0.0439907	0.0783417	-4.21529	Red
ERCC6L2	1.09638	-6.95834	1.9064	0.0916733	0.138202	-4.91133	Gray
ENSG00000289277	1.09598	-5.65594	1.65915	0.134253	0.188711	-5.25864	Gray
STIMATE-MUSTN1	1.09474	-6.62116	2.06393	0.0716065	0.114013	-4.68056	Gray
MAP3K9-DT	1.09455	-6.54817	1.63014	0.140304	0.195128	-5.29792	Gray
KCNJ15	1.09396	-4.8077	1.02167	0.335752	0.402548	-6.02105	Gray
HSF2BP	1.09335	-6.71959	3.16389	0.0126844	0.0337393	-2.9891	Red
GCC2	1.09316	-7.18361	1.70793	0.124616	0.178334	-5.19182	Gray
DCBLD1	1.09195	-7.19088	2.51333	0.0351465	0.0674025	-3.99737	Red
EYA1	1.09172	-6.397	2.01982	0.0767532	0.119283	-4.7458	Gray
CCDC14	1.09063	-5.98019	2.33984	0.0462778	0.0815349	-4.26422	Red
ASPH	1.09008	-2.53965	0.410956	0.691497	0.736672	-6.46859	Gray
ZNF22-AS1	1.08867	-6.78345	2.68596	0.0267471	0.05488	-3.72984	Red
ENSG00000284779	1.08704	-5.00212	1.18677	0.268132	0.334546	-5.84705	Gray
C15orf62	1.08687	-8.78883	2.20906	0.0569366	0.0953558	-4.46312	Gray
IGSF11	1.08683	-6.33773	2.90436	0.0189767	0.0437991	-3.39059	Red
FAM156B	1.08566	-6.20468	2.45565	0.0385118	0.0707562	-4.08638	Red
CATSPERE	1.08563	-5.43092	3.28471	0.0105397	0.0305065	-2.80357	Red
TPP2	1.08538	-5.66645	1.48602	0.174188	0.233153	-5.48764	Gray
BCL2L2-PABPN1	1.08445	-1.48387	0.415579	0.688241	0.734144	-6.46653	Gray
AGPS	1.08107	-7.72779	2.34196	0.0461227	0.081441	-4.26098	Red
DUBR	1.08009	-6.54283	1.87641	0.0960604	0.14386	-4.95453	Gray
POLDIP3	1.07898	-7.21609	3.26843	0.010805	0.0307911	-2.8285	Red
GPRC5B	1.07754	-6.02348	2.45566	0.0385114	0.0707562	-4.08637	Red
TMEM25	1.07721	-6.07371	1.49206	0.172634	0.231695	-5.47989	Gray
SLC6A13	1.07695	-7.17531	3.34367	0.00963458	0.0289993	-2.71346	Red
ARFGEF1	1.07693	-6.5164	2.47729	0.0372129	0.0693339	-4.05302	Red
ENSG00000288658	1.07565	-6.67375	2.28814	0.0502316	0.0867922	-4.34313	Gray
GAP43	1.07316	-4.77741	1.83198	0.102926	0.152223	-5.01801	Gray
KCNN3	1.06978	-6.14627	2.78976	0.0227125	0.0488093	-3.56859	Red
ENSG00000287919	1.06773	-5.85193	2.27458	0.0513231	0.0881494	-4.36377	Gray
STRN	1.0653	-6.68004	2.65268	0.0281905	0.057044	-3.7815	Red
DENND4C	1.06405	-8.11886	2.10142	0.0674967	0.109496	-4.62478	Gray
XNDC1N	1.06393	-5.77513	2.69869	0.0262155	0.0541455	-3.71008	Red
APLNR	1.06341	-6.61332	2.48859	0.036552	0.0689566	-4.03558	Red
SYT15B	1.06232	-6.26941	2.19376	0.0583324	0.0969615	-4.48623	Gray
SETDB1	1.06178	-5.72963	1.6564	0.134816	0.189183	-5.26238	Gray
CLN5	1.06144	-4.72048	1.34154	0.215245	0.277826	-5.66758	Gray
HMGA2	1.06131	-5.78914	3.20866	0.0118408	0.0325003	-2.92022	Red
RIC1	1.0609	-5.85556	2.12208	0.0653311	0.106398	-4.59392	Gray
MMRN1	1.0608	-5.60235	3.20341	0.0119366	0.0326914	-2.92829	Red
GLYCTK	1.05922	-8.41112	2.48417	0.0368092	0.0690518	-4.0424	Red
CBFA2T2	1.05579	-8.12954	2.70945	0.0257742	0.053416	-3.69336	Red
TTC36-AS1	1.05414	-5.20393	3.19631	0.0120675	0.0328694	-2.93921	Red
MUSK	1.05208	-6.43191	2.54325	0.0335188	0.0650306	-3.95109	Red
ASAH2	1.0506	-5.85643	2.29526	0.0496678	0.0861162	-4.33228	Red
FAM86B3P	1.0497	-6.92113	3.40555	0.00877207	0.0276968	-2.61924	Red
ETV3	1.04808	-6.9337	2.72213	0.0252642	0.0525723	-3.67367	Red
ZMYND11	1.04577	-4.20257	0.910455	0.388224	0.454538	-6.12688	Gray
LONRF2	1.04461	-6.7999	2.73515	0.0247508	0.0518064	-3.65343	Red
SSTR2	1.04422	-6.35841	2.07084	0.0708307	0.113163	-4.6703	Gray
MED17	1.04287	-7.51712	2.44608	0.0391005	0.0715217	-4.10112	Red
SMOC1	1.0414	-6.57069	2.2725	0.051493	0.0882989	-4.36694	Gray
ARFGAP1	1.0404	-7.27417	3.6414	0.00616254	0.0232963	-2.26371	Red
ENSG00000272983	1.03769	-5.71717	2.5849	0.0313799	0.0615994	-3.88661	Red
ENSG00000277639	1.03665	-5.7973	2.84206	0.0209217	0.0464855	-3.48734	Red
ZKSCAN5	1.03426	-6.99625	3.29719	0.0103409	0.0302473	-2.78447	Red
CCDC138	1.03248	-5.22185	1.3777	0.204253	0.265432	-5.6236	Gray
XRCC3	1.03046	-5.58041	2.07329	0.0705578	0.112992	-4.66666	Gray
MMAA	1.03023	-6.11932	2.19948	0.0578067	0.0962801	-4.47759	Gray
ZNF10	1.02871	-6.16198	2.77346	0.0233023	0.0496069	-3.59392	Red
GNL3L	1.02597	-6.01192	1.39885	0.19805	0.258845	-5.59754	Gray
STAP1	1.02239	-7.01034	1.53523	0.161871	0.220452	-5.42392	Gray
KCNJ5	1.01794	-5.88257	2.32161	0.0476357	0.0831126	-4.29209	Red
IGF1R	1.01631	-6.61226	2.16537	0.0610116	0.100412	-4.52899	Gray
MIOS	1.01461	-5.24656	1.44818	0.184216	0.243571	-5.53582	Gray
MMP16	1.01435	-6.81754	3.01296	0.0160208	0.0394451	-3.22221	Red
C8orf34-AS1	1.01363	-6.19571	3.03331	0.0155223	0.0387379	-3.19071	Red
WIPF1	1.01281	-5.15518	1.64779	0.136593	0.191138	-5.27406	Gray
C3orf38	1.01259	-6.30447	2.10087	0.0675554	0.10952	-4.6256	Gray
LINC00989	1.01008	-5.27309	2.41553	0.0410422	0.0740957	-4.14814	Red
SH3TC2	1.00825	-6.1304	1.82725	0.103684	0.15305	-5.02474	Gray
LINC01936	1.00678	-6.69214	3.00696	0.0161709	0.0396329	-3.2315	Red
UTS2B	1.00577	-6.007	2.92542	0.0183623	0.0428676	-3.35791	Red
LINC02975	1.00552	-6.26359	2.65007	0.0283068	0.0572329	-3.78555	Red
ENSG00000274460	1.00492	-5.49865	2.59164	0.0310468	0.0612347	-3.87617	Red
ENSG00000287886	1.00379	-6.28947	2.55642	0.032827	0.0638873	-3.93072	Red
NFYC	1.00256	-5.33182	0.983489	0.353128	0.420149	-6.05847	Gray
ANKS1A	0.99872	-6.72861	1.98237	0.0814013	0.125368	-4.80082	Gray
SLC25A17	0.998375	-6.82719	3.37311	0.00921361	0.0282558	-2.66859	Gray
VPS37A	0.997743	-5.4299	1.50266	0.169934	0.228811	-5.46623	Gray
IL13RA1	0.995747	-6.38543	1.26598	0.239851	0.30408	-5.75703	Gray
ELMO1	0.990841	-5.92204	1.69202	0.127687	0.181734	-5.21372	Gray
SHROOM4	0.990837	-5.60116	2.97543	0.0169841	0.0408635	-3.28034	Gray
C18orf54	0.990808	-6.2156	2.81012	0.0219973	0.0481507	-3.53696	Gray
MRPL1	0.989684	-6.97487	1.40379	0.196626	0.257118	-5.59142	Gray
MBOAT2	0.989457	-5.32968	0.918556	0.38421	0.451161	-6.1195	Gray
ITGB3BP	0.989366	-7.2407	1.42965	0.189312	0.248858	-5.55916	Gray
FRMD4B	0.989294	-6.43441	2.88611	0.0195264	0.0446138	-3.41892	Gray
UBE4A	0.988195	-5.40682	2.38044	0.0433917	0.0774962	-4.20204	Gray
ENSG00000231204	0.988048	-6.35525	1.3101	0.225212	0.289045	-5.70521	Gray
AS3MT	0.988043	-5.84811	1.17749	0.271615	0.33812	-5.85732	Gray
DNAH5	0.987509	-5.4028	2.83709	0.0210855	0.0466386	-3.49506	Gray
ENSG00000287544	0.983806	-6.50914	2.50568	0.0355749	0.0679107	-4.00918	Gray
MPDU1	0.981988	-6.0612	1.47945	0.175893	0.234855	-5.49606	Gray
EVI5	0.980275	-6.00176	1.19079	0.266633	0.333124	-5.84257	Gray
ENSG00000291178	0.979854	-5.53443	2.79055	0.0226842	0.0487905	-3.56736	Gray
ALDH1A1	0.978785	-7.22985	2.95792	0.0174542	0.041435	-3.3075	Gray
THBS1	0.977624	-4.51335	0.640607	0.539036	0.599062	-6.34051	Gray
SEPSECS-AS1	0.977289	-6.40667	1.86	0.0985443	0.146875	-4.97805	Gray
NADK	0.977075	-6.54474	2.26218	0.0523423	0.0892588	-4.38263	Gray
ZNF414	0.975082	-6.21731	2.32908	0.0470745	0.0824378	-4.28068	Gray
PBX3	0.971292	-6.83693	3.28712	0.0105011	0.0304299	-2.79989	Gray
SLC29A3	0.970652	-7.45318	2.83819	0.021049	0.0465991	-3.49334	Gray
DOK5	0.969292	-5.37204	1.35039	0.212509	0.275291	-5.65688	Gray
ENSG00000279259	0.969258	-5.39086	2.35681	0.0450489	0.0798274	-4.23825	Gray
TSR1	0.962484	-2.67883	0.319733	0.757061	0.800367	-6.50459	Gray
ENSG00000285976	0.961898	-6.51441	1.51194	0.167601	0.22617	-5.45423	Gray
HIF3A	0.95783	-6.0655	3.00196	0.016297	0.0397469	-3.23924	Gray
SLC20A2	0.957473	-5.62043	2.06143	0.0718885	0.114243	-4.68426	Gray
MAGI1	0.956549	-5.27953	0.856296	0.415838	0.480777	-6.17482	Gray
CASQ2	0.956146	-6.0273	3.54711	0.0070908	0.0248128	-2.40512	Gray
EFHB	0.954022	-7.27759	2.29309	0.0498397	0.0862942	-4.3356	Gray
DPY19L2P2	0.95343	-5.89077	1.30712	0.226174	0.290131	-5.70874	Gray
ENSG00000261502	0.952853	-6.1735	1.4879	0.173702	0.232879	-5.48523	Gray
ST18	0.951324	-6.46215	2.01591	0.0772253	0.119675	-4.75155	Gray
FEM1A	0.95067	-3.20093	0.828901	0.430321	0.495405	-6.19814	Gray
SLCO5A1	0.949338	-5.64116	2.0974	0.0679262	0.109978	-4.63078	Gray
DMXL2	0.947086	-7.18884	2.08197	0.0695993	0.11196	-4.65375	Gray
LRRC69	0.946795	-5.82912	1.57714	0.152003	0.208836	-5.36877	Gray
HIP1	0.943519	-5.86694	1.8006	0.108052	0.158403	-5.06248	Gray
ARRB1	0.941243	-6.63952	1.71358	0.123542	0.177352	-5.18403	Gray
ZBTB12	0.941117	-6.75021	2.5417	0.0336014	0.0651403	-3.9535	Gray
TTC39B	0.940437	-6.23729	2.00658	0.078366	0.121217	-4.76529	Gray
MSR1	0.939788	-6.49657	2.3319	0.0468648	0.0822275	-4.27637	Gray
ZNF483	0.938948	-6.12871	2.3961	0.0423265	0.0760007	-4.17799	Gray
C1RL	0.938451	-5.06311	1.90058	0.0925092	0.139294	-4.91973	Gray
LINC01266	0.936076	-5.78687	2.39782	0.0422113	0.075885	-4.17535	Gray
PTP4A1	0.932574	-5.91287	2.33603	0.0465587	0.0817481	-4.27006	Gray
SEPTIN2	0.931652	-6.84357	0.920175	0.383412	0.450595	-6.11802	Gray
FRAT2	0.930678	-11.6249	2.7597	0.0238125	0.050392	-3.6153	Gray
LRBA	0.926701	-5.99413	1.85489	0.0993291	0.147956	-4.98535	Gray
TCFL5	0.922886	-5.80652	1.79048	0.109755	0.160515	-5.07675	Gray
JAG2	0.922408	-5.69744	1.56917	0.153837	0.210892	-5.37932	Gray
LINC01829	0.920081	-6.31633	1.82839	0.103501	0.152892	-5.02311	Gray
ENSG00000232934	0.917975	-6.1148	1.57604	0.152255	0.209019	-5.37023	Gray
GPAT4-AS1	0.916606	-5.7244	2.93548	0.0180759	0.0424266	-3.34229	Gray
STXBP1	0.913219	-6.781	1.62155	0.142143	0.197355	-5.30949	Gray
MEMO1	0.913076	-6.2102	1.97523	0.0823168	0.126388	-4.81126	Gray
STC1	0.912728	-5.85782	1.82696	0.103731	0.15305	-5.02515	Gray
C16orf72	0.912634	-7.06747	1.537	0.161444	0.219991	-5.42162	Gray
ZMYND8	0.910345	-6.39705	1.4436	0.185466	0.244835	-5.54161	Gray
SHOX2	0.908346	-6.55938	1.23213	0.251617	0.316903	-5.79598	Gray
ENSG00000279443	0.903956	-7.39789	3.18641	0.0122525	0.0331261	-2.95444	Gray
INTS3	0.903626	-6.40793	2.34101	0.0461922	0.0814485	-4.26244	Gray
FNDC5	0.902883	-5.74583	1.7605	0.11495	0.16723	-5.11882	Gray
ENSG00000280339	0.901938	-6.08812	2.04189	0.0741341	0.11633	-4.7132	Gray
PYGO1	0.901206	-5.61858	1.39143	0.200207	0.260981	-5.60671	Gray
ARMH3	0.900593	-7.66924	1.78227	0.111155	0.162182	-5.0883	Gray
CCDC126	0.900376	-5.78108	2.60473	0.0304105	0.0603133	-3.85588	Gray
RIMBP2	0.899746	-6.15533	2.52592	0.0344523	0.0664284	-3.97791	Gray
ENSG00000280010	0.899461	-5.42612	1.16417	0.276684	0.343105	-5.87199	Gray
LINC02694	0.898672	-6.59047	3.04621	0.0152146	0.0382922	-3.17075	Gray
TPD52	0.897711	-5.91561	1.35496	0.211106	0.273616	-5.65133	Gray
BAALC-AS1	0.896781	-6.59098	2.50679	0.0355125	0.0679107	-4.00747	Gray
TTLL4	0.896694	-6.86747	2.39809	0.0421931	0.075885	-4.17493	Gray
ENSG00000226465	0.896402	-7.10658	1.62783	0.140796	0.195702	-5.30103	Gray
ENSG00000274272	0.896295	-6.49082	1.63036	0.140257	0.195128	-5.29762	Gray
GPHN	0.89609	-6.16161	2.30169	0.0491646	0.085541	-4.32249	Gray
NFATC2IP	0.895624	-5.38409	2.08139	0.0696629	0.111967	-4.65462	Gray
ENSG00000274922	0.895487	-6.55954	1.74883	0.117034	0.169756	-5.13511	Gray
CBFA2T3	0.893935	-6.32877	1.38485	0.202137	0.263358	-5.61481	Gray
ERICH2	0.893772	-5.99826	1.65663	0.134769	0.189183	-5.26206	Gray
LINC02351	0.893768	-6.58833	2.46613	0.037877	0.0702626	-4.07023	Gray
FAM124A	0.893617	-6.24363	1.7942	0.109126	0.159764	-5.07151	Gray
MIR302CHG	0.893581	-7.57551	2.47915	0.0371029	0.0693339	-4.05014	Gray
SIAH1	0.89007	-6.08687	0.958837	0.3647	0.431041	-6.08203	Gray
SLC25A26	0.887301	-6.14115	1.72455	0.121481	0.175199	-5.16885	Gray
ENSG00000290450	0.885285	-7.5059	1.9789	0.0818455	0.125819	-4.80591	Gray
DPY19L1P1	0.884774	-5.63336	3.01255	0.016031	0.0394451	-3.22285	Gray
SPATA41	0.884087	-6.0754	2.03833	0.0745514	0.116911	-4.71848	Gray
SYT7	0.884012	-6.2263	2.47747	0.0372019	0.0693339	-4.05273	Gray
ZDHHC15	0.882608	-6.55179	1.76939	0.113386	0.165245	-5.10638	Gray
IL7	0.881728	-6.42772	2.71169	0.0256834	0.0533111	-3.68988	Gray
TP53I3	0.880838	-7.36376	1.84293	0.101192	0.150104	-5.00242	Gray
PECR	0.880583	-6.76443	1.96534	0.0836035	0.127813	-4.82573	Gray
TBL1XR1	0.880166	-4.81803	1.0426	0.326509	0.392977	-6.00008	Gray
FAM168A	0.87835	-7.16884	2.85309	0.0205629	0.0460651	-3.4702	Gray
RBM20	0.874206	-6.12967	1.66441	0.133182	0.187522	-5.25148	Gray
RAB35	0.873988	-9.24601	2.16751	0.0608058	0.100151	-4.52577	Gray
PTCHD1	0.870093	-6.34798	2.04789	0.0734378	0.115893	-4.70433	Gray
FAM88F	0.869929	-5.97973	1.71916	0.12249	0.176381	-5.17631	Gray
TBC1D8	0.869246	-8.34536	2.35387	0.0452598	0.0801442	-4.24276	Gray
ATXN3	0.868188	-5.35188	0.971135	0.358892	0.425183	-6.07034	Gray
NFAT5	0.867704	-6.34289	1.00156	0.344821	0.411711	-6.0409	Gray
DUSP5-DT	0.865297	-7.08401	2.28311	0.0506342	0.0873667	-4.3508	Gray
SYN2	0.86478	-6.2573	2.04899	0.073311	0.115766	-4.70271	Gray
ENSG00000285330	0.864525	-6.30702	2.06886	0.0710528	0.113348	-4.67325	Gray
SOCS2-AS1	0.8638	-7.19778	2.27909	0.0509579	0.0877432	-4.35692	Gray
POC1B-AS1	0.86187	-8.30002	2.27187	0.0515443	0.0883263	-4.3679	Gray
FRS2	0.859809	-13.1681	2.45848	0.0383394	0.0706998	-4.08202	Gray
SLC1A3	0.855607	-6.6992	0.989277	0.350451	0.417562	-6.05287	Gray
ERVK13-1	0.85543	-6.32813	1.52464	0.164455	0.222997	-5.43774	Gray
CCDC43	0.854893	-5.27685	0.892901	0.397026	0.463105	-6.14268	Gray
H3C10	0.85374	-5.79924	1.34664	0.213664	0.276644	-5.66142	Gray
SLC6A15	0.853691	-6.36548	2.20372	0.0574202	0.0958869	-4.47119	Gray
IGF2BP3	0.852718	-6.91024	1.61398	0.143781	0.198854	-5.31965	Gray
SLAMF1	0.852505	-6.31579	1.93068	0.0882624	0.133707	-4.87618	Gray
FAM156A	0.846219	-5.48934	1.08433	0.308669	0.375421	-5.95729	Gray
ENSG00000260855	0.843597	-6.40118	2.42684	0.0403121	0.0733081	-4.13074	Gray
MYO5B	0.842354	-6.53491	1.66572	0.132915	0.187358	-5.24969	Gray
ARHGAP15	0.841849	-5.91354	2.9309	0.0182057	0.0426108	-3.3494	Gray
RBM5	0.841762	-7.35759	1.51325	0.167274	0.226056	-5.45253	Gray
MKRN1	0.839456	-3.96441	0.873337	0.407004	0.472754	-6.16	Gray
GRIP1	0.838065	-6.43704	2.45673	0.038446	0.0707562	-4.08472	Gray
MTM1	0.837301	-5.81592	1.51715	0.166303	0.224892	-5.44747	Gray
PPIL6	0.833892	-5.31598	2.01713	0.0770779	0.119595	-4.74976	Gray
AGFG2	0.832256	-6.47932	2.10905	0.0666896	0.108468	-4.6134	Gray
LRATD2	0.832	-6.99538	2.43704	0.0396654	0.072343	-4.11505	Gray
ENSG00000261218	0.830601	-6.91224	2.29996	0.0492993	0.0857155	-4.32512	Gray
LY6E-DT	0.827215	-5.90245	2.58899	0.0311772	0.0613946	-3.88027	Gray
C16orf46	0.825395	-6.81593	2.08501	0.0692664	0.111568	-4.64923	Gray
TFAP2A-AS1	0.824798	-6.72713	2.2058	0.0572311	0.0957049	-4.46805	Gray
NEK11	0.824156	-7.82748	1.84485	0.100891	0.149835	-4.99969	Gray
MS4A4A	0.82372	-6.07489	2.01367	0.0774976	0.120023	-4.75485	Gray
LVRN	0.821995	-5.99363	2.44833	0.0389612	0.0713194	-4.09765	Gray
ENSG00000262198	0.821883	-6.1159	1.93422	0.0877757	0.13305	-4.87105	Gray
ENSG00000240401	0.821793	-10.3991	1.09723	0.303312	0.370055	-5.94381	Gray
KLHL6	0.820531	-6.08197	2.74377	0.0244171	0.0512635	-3.64005	Gray
ENSG00000251867	0.818907	-5.85244	2.03309	0.0751682	0.117583	-4.72622	Gray
MR1	0.815883	-6.83177	1.62381	0.141656	0.196788	-5.30644	Gray
TTC41P	0.815152	-6.20111	2.41749	0.040915	0.0739585	-4.14513	Gray
LPP	0.805559	-9.54485	2.27254	0.0514899	0.0882989	-4.36688	Gray
DOCK5	0.803963	-6.23672	1.7941	0.109142	0.159764	-5.07165	Gray
GALNT4	0.803928	-7.1697	1.95677	0.0847322	0.12938	-4.83823	Gray
SLF2	0.80131	-6.11695	1.65477	0.135151	0.18944	-5.26459	Gray
PRR16	0.79865	-6.26837	2.22023	0.0559389	0.094296	-4.44624	Gray
ANKH	0.79711	-7.45072	2.4237	0.0405134	0.0735669	-4.13557	Gray
PSPC1	0.795973	-5.96778	1.05613	0.320639	0.387406	-5.98634	Gray
RNF165	0.793853	-6.96494	2.5384	0.0337778	0.0653806	-3.95861	Gray
GALNT5	0.792323	-6.13015	0.984446	0.352684	0.419822	-6.05755	Gray
ITPKB	0.791885	-7.45437	1.76258	0.114582	0.166792	-5.11591	Gray
GART	0.791066	-7.72824	1.90849	0.0913744	0.137835	-4.90831	Gray
NCAPG	0.789964	-5.69374	0.726882	0.487264	0.5521	-6.27925	Gray
HDGFL3	0.789131	-7.15519	1.13785	0.286919	0.353338	-5.90059	Gray
ZDHHC21	0.785767	-5.8166	1.11826	0.294735	0.362249	-5.92158	Gray
FAM169A	0.785413	-7.08928	2.49913	0.0359463	0.0682023	-4.0193	Gray
ZNF441	0.784604	-7.42667	2.39589	0.0423411	0.0760007	-4.17832	Gray
ZNF831	0.784291	-7.74291	1.70808	0.124587	0.178334	-5.19162	Gray
C6orf141	0.784154	-6.40313	1.57053	0.153522	0.210576	-5.37752	Gray
KCNJ8	0.783156	-4.722	0.697817	0.504343	0.567073	-6.30066	Gray
ENSG00000288520	0.77979	-5.94347	1.47148	0.177982	0.237088	-5.50624	Gray
TCP11L1	0.776995	-7.38662	2.50456	0.035638	0.0679272	-4.01091	Gray
OIP5-AS1	0.776119	-6.75036	1.65333	0.135448	0.189749	-5.26655	Gray
AFAP1-AS1	0.775825	-6.83654	2.03198	0.0752996	0.117641	-4.72786	Gray
ZNF787	0.774453	-5.73044	1.5622	0.155458	0.21288	-5.38853	Gray
ENSG00000205037	0.773556	-5.93841	2.08845	0.0688923	0.111181	-4.64412	Gray
ENSG00000277534	0.773044	-6.26003	1.62041	0.142388	0.197585	-5.31102	Gray
KIAA1586	0.771981	-7.20077	2.42193	0.0406273	0.0736175	-4.13829	Gray
FUT4	0.770972	-7.13614	2.53613	0.0338992	0.0655647	-3.96211	Gray
BMPR1B	0.770463	-6.88781	2.67582	0.0271786	0.0556738	-3.74558	Gray
HEXIM1	0.767188	-5.94293	1.70226	0.125702	0.179522	-5.19963	Gray
ENSG00000288888	0.764887	-6.62228	1.78357	0.110932	0.161951	-5.08647	Gray
GAS6-DT	0.764821	-8.48081	2.62551	0.0294274	0.0587372	-3.82366	Gray
FAM83F	0.763904	-6.52981	1.31747	0.222841	0.286592	-5.69644	Gray
ADAMTS16-DT	0.763058	-6.45568	2.04491	0.0737833	0.116071	-4.70874	Gray
SLC1A1	0.761122	-6.23442	1.94804	0.0858989	0.130834	-4.85095	Gray
INPP5F	0.759957	-5.83513	1.02763	0.333098	0.399558	-6.01511	Gray
ENSG00000232295	0.759746	-6.13061	1.68147	0.12976	0.184159	-5.22817	Gray
POLH	0.75929	-6.5162	1.28192	0.234473	0.298475	-5.73845	Gray
PTGR2	0.757607	-6.38776	1.66117	0.133841	0.188238	-5.25589	Gray
TMEM86A	0.756122	-7.00264	1.6311	0.140098	0.195059	-5.29662	Gray
ITFG2	0.75436	-7.26337	2.53394	0.0340168	0.0656903	-3.96549	Gray
ZBTB34	0.753409	-7.08622	1.46255	0.18035	0.239731	-5.51761	Gray
PRDM16	0.752977	-6.57972	1.80749	0.106906	0.157177	-5.05274	Gray
TMEM254	0.7514	-8.30958	2.37493	0.0437722	0.0780873	-4.21048	Gray
MTERF2	0.751294	-6.14825	1.07007	0.314678	0.381683	-5.97205	Gray
SIK2	0.750224	-4.05307	0.29698	0.773769	0.811839	-6.51221	Gray
UBOX5	0.747744	-6.21263	2.4882	0.0365745	0.0689566	-4.03618	Gray
ENSG00000290045	0.746134	-6.06152	1.66796	0.132463	0.186932	-5.24664	Gray
ZNF337-AS1	0.74579	-6.53065	1.32367	0.220862	0.284194	-5.68904	Gray
FARP1	0.743766	-3.1229	0.281157	0.785463	0.821002	-6.51718	Gray
MSI1	0.739088	-8.53198	2.19483	0.0582338	0.0968622	-4.48461	Gray
SMC5	0.737765	-8.10267	0.749889	0.474012	0.539289	-6.26177	Gray
STAG1	0.736638	-5.59452	1.03628	0.329278	0.395927	-6.00644	Gray
TPT1-AS1	0.736552	-6.1239	1.87471	0.0963139	0.144153	-4.95696	Gray
ZNF714	0.733196	-5.70994	0.857824	0.415041	0.480077	-6.17351	Gray
MYOCD	0.732274	-5.61606	1.67269	0.131511	0.186115	-5.24018	Gray
ITCH	0.728786	-9.36131	2.23442	0.0546955	0.0925816	-4.42475	Gray
ARHGAP11A	0.728533	-8.44008	2.39339	0.0425091	0.0762474	-4.18216	Gray
TDRD1	0.727209	-7.4919	2.0707	0.0708462	0.113163	-4.6705	Gray
FPR3	0.725914	-6.80695	2.41074	0.0413554	0.0746072	-4.15551	Gray
GOLGA6L23P	0.723764	-6.29129	1.29895	0.228839	0.292197	-5.71842	Gray
TNFAIP8L1	0.721687	-7.18161	2.28889	0.0501723	0.0867497	-4.34199	Gray
UBE3C	0.711871	-8.96535	2.07923	0.0699005	0.112155	-4.65783	Gray
SEL1L3	0.708473	-6.42836	2.06891	0.0710473	0.113348	-4.67317	Gray
HCG18	0.70822	-7.52588	1.52216	0.165064	0.223702	-5.44096	Gray
ARAF	0.707696	-3.78603	0.264043	0.798176	0.831243	-6.52226	Gray
TNFSF9	0.707352	-8.06741	2.24308	0.0539509	0.0915074	-4.41163	Gray
TUBE1	0.704035	-7.11754	1.87928	0.0956317	0.143304	-4.9504	Gray
ZNF287	0.702881	-6.31278	1.29975	0.228575	0.29201	-5.71747	Gray
FBXO17	0.696269	-7.39302	2.13785	0.0637245	0.104189	-4.57031	Gray
THSD7A	0.695846	-6.21062	2.26293	0.0522803	0.0892588	-4.38149	Gray
MACIR	0.694605	-7.37661	1.92291	0.0893415	0.135177	-4.88746	Gray
SP1	0.692091	-5.12215	0.916561	0.385196	0.451628	-6.12132	Gray
GCH1	0.691746	-6.90712	1.7024	0.125676	0.179522	-5.19945	Gray
ZNF502	0.686257	-7.05945	2.13743	0.0637672	0.104191	-4.57095	Gray
RAB3B	0.685728	-10.4608	2.43029	0.0400921	0.0729613	-4.12543	Gray
PNISR	0.684653	-0.190458	0.31806	0.758285	0.800643	-6.50517	Gray
C5orf38	0.684641	-8.30578	1.49314	0.172357	0.231625	-5.4785	Gray
ENSG00000176593	0.683712	-6.33157	2.24336	0.0539262	0.0915074	-4.41119	Gray
SMAD9	0.68269	-6.34153	1.29163	0.231244	0.294816	-5.72704	Gray
RBSN	0.679492	-6.04919	1.88429	0.0948888	0.142362	-4.9432	Gray
TTLL5	0.678742	-8.53139	1.71314	0.123626	0.17737	-5.18464	Gray
TTC39A	0.67501	-6.33325	1.7387	0.118871	0.171932	-5.14922	Gray
PAK3	0.673067	-7.21103	2.03362	0.0751059	0.117559	-4.72544	Gray
SRCAP	0.671848	-6.78127	1.25765	0.242704	0.306917	-5.76669	Gray
WASHC4	0.669266	-6.49359	1.46206	0.180482	0.239778	-5.51824	Gray
ENSG00000273489	0.668961	-6.08096	1.82079	0.104727	0.154337	-5.0339	Gray
RBMS2	0.667801	-6.94653	1.97245	0.0826767	0.126785	-4.81534	Gray
SYCP3	0.667364	-7.26778	1.46934	0.178548	0.237588	-5.50897	Gray
EPCAM	0.664359	-7.98131	1.39809	0.198269	0.258931	-5.59847	Gray
MSANTD2	0.664356	-6.63593	2.38162	0.0433105	0.0774621	-4.20023	Gray
SLC6A12	0.663729	-6.4537	1.59758	0.147391	0.203396	-5.3416	Gray
GAN	0.657133	-7.18988	1.92185	0.0894893	0.135319	-4.88899	Gray
ITPRID2	0.655439	-6.26322	1.72028	0.122279	0.176248	-5.17476	Gray
RABGAP1L-DT	0.655368	-6.34188	1.64582	0.137003	0.19139	-5.27673	Gray
ERCC6	0.652257	-7.15218	1.5597	0.156042	0.213445	-5.39182	Gray
ENSG00000223374	0.651768	-5.67406	2.00218	0.0789093	0.121982	-4.77175	Gray
BTK	0.649953	-7.39397	2.20854	0.0569842	0.0953558	-4.46392	Gray
URGCP	0.646901	-6.30462	1.52051	0.165471	0.224132	-5.4431	Gray
FAM124B	0.645612	-6.841	1.9655	0.0835824	0.127813	-4.8255	Gray
TMEM33	0.643849	-11.4129	2.13164	0.0643528	0.10501	-4.57962	Gray
CACNA1C	0.640938	-6.59016	1.07759	0.311498	0.378378	-5.96429	Gray
GVQW3	0.640505	-8.06952	2.10298	0.0673306	0.109368	-4.62245	Gray
DNAJC27	0.634006	-6.67093	1.15744	0.279273	0.345457	-5.87935	Gray
BORCS7	0.633579	-1.1846	0.237884	0.817731	0.847632	-6.52941	Gray
ENSG00000289204	0.628507	-7.3659	1.67157	0.131736	0.186327	-5.24171	Gray
SEC16B	0.62635	-6.32576	1.64933	0.136274	0.190798	-5.27197	Gray
ENSG00000287335	0.624381	-7.23829	1.61534	0.143486	0.198556	-5.31783	Gray
ENSG00000280164	0.623376	-7.10861	1.41766	0.192673	0.252347	-5.57416	Gray
TECPR2	0.614961	-7.06566	1.88985	0.0940707	0.141389	-4.93521	Gray
LUCAT1	0.613811	-7.13921	1.4951	0.171855	0.231273	-5.47598	Gray
ZNF44	0.612221	-8.44749	2.17453	0.0601345	0.0994931	-4.51521	Gray
ZBED3-AS1	0.611667	-6.88638	1.30601	0.226534	0.290385	-5.71006	Gray
ENSG00000289488	0.611022	-7.68578	2.09911	0.0677439	0.109754	-4.62823	Gray
PDSS1	0.6103	-6.33684	1.02086	0.336113	0.402787	-6.02186	Gray
NCBP3	0.608378	-7.39013	1.72584	0.121242	0.174956	-5.16707	Gray
LRRC8C-DT	0.608213	-6.76596	1.28138	0.234654	0.298552	-5.73908	Gray
HAUS3	0.605758	-5.81706	1.50528	0.169271	0.22804	-5.46284	Gray
C22orf39	0.604635	-6.37125	1.57767	0.151883	0.208787	-5.36808	Gray
TMEM65	0.603389	-7.93686	1.85358	0.0995321	0.148081	-4.98722	Gray
LSAMP	0.603272	-6.47186	1.3967	0.198674	0.259118	-5.6002	Gray
EED	0.601436	-5.43969	0.731052	0.484845	0.549961	-6.27612	Gray
SZT2	0.599799	-9.59955	1.49154	0.172767	0.231749	-5.48056	Gray
ST8SIA1	0.599196	-6.18122	1.16983	0.274521	0.3411	-5.86577	Gray
ZHX3	0.598665	-7.41677	2.02521	0.0761052	0.118743	-4.73785	Gray
SLC26A4	0.596072	-7.03392	1.3971	0.198557	0.2591	-5.5997	Gray
PRTG	0.592511	-6.7081	1.45205	0.183169	0.242443	-5.53093	Gray
SLFN5	0.589209	-9.47326	1.526	0.16412	0.222665	-5.43596	Gray
HADH	0.589052	-1.96762	0.220673	0.830672	0.858369	-6.53372	Gray
ENSG00000235609	0.588624	-8.01361	2.14519	0.0629894	0.10319	-4.5593	Gray
TRAF6	0.588114	-5.79792	0.799968	0.44599	0.511372	-6.22207	Gray
ENSG00000279744	0.587842	-7.88888	2.08037	0.0697753	0.112027	-4.65614	Gray
LINC01277	0.586231	-6.20458	1.60607	0.145511	0.201025	-5.33025	Gray
FAM9C	0.579476	-6.85364	1.5896	0.149176	0.205632	-5.35223	Gray
RARS2	0.578807	-5.84925	0.712445	0.495701	0.560369	-6.28998	Gray
EEF1A1P6	0.576579	-7.13971	1.30243	0.2277	0.29119	-5.7143	Gray
FAM157C	0.574496	-7.39563	1.27834	0.235673	0.29949	-5.74264	Gray
METTL14	0.574092	-6.61659	1.45997	0.18104	0.240391	-5.52089	Gray
SLC25A27	0.572979	-7.24841	1.80662	0.10705	0.157296	-5.05397	Gray
RARS1P1	0.570945	-8.27004	1.83352	0.102681	0.151951	-5.01583	Gray
SHLD1	0.569342	-5.77416	1.20455	0.261556	0.328095	-5.82719	Gray
ZC3HAV1	0.568634	-7.69356	1.56023	0.155918	0.213392	-5.39112	Gray
TMEM165	0.567703	-10.9936	0.9081	0.389397	0.455697	-6.12902	Gray
ANKS1B	0.566995	-7.45229	1.88658	0.09455	0.142024	-4.9399	Gray
ENSG00000228793	0.566337	-10.1988	1.75426	0.11606	0.168551	-5.12754	Gray
KAZALD1	0.562823	-6.85138	0.929188	0.378988	0.446026	-6.10974	Gray
MMS22L	0.562343	-5.70338	1.09381	0.304725	0.371597	-5.94739	Gray
METTL4	0.560702	-5.93585	0.596341	0.566832	0.624391	-6.36923	Gray
ENSG00000225528	0.558932	-7.14262	1.4202	0.191955	0.251684	-5.57098	Gray
ATP8B4	0.558769	-8.44622	1.54144	0.160373	0.218651	-5.4158	Gray
STS	0.558298	-6.68648	1.19526	0.264975	0.331385	-5.83759	Gray
SIX2	0.557336	-6.24418	1.20525	0.261298	0.327937	-5.8264	Gray
JCAD	0.557309	-6.9989	1.38145	0.203141	0.26439	-5.61899	Gray
CACNB2	0.557099	-6.49685	1.55714	0.156642	0.214149	-5.39519	Gray
LNPEP	0.555471	-5.41638	0.547987	0.598107	0.653933	-6.39844	Gray
EPB41L1	0.552012	-5.12378	0.485545	0.639832	0.689581	-6.43275	Gray
CADM3-AS1	0.548253	-5.98635	1.67771	0.130509	0.184906	-5.23333	Gray
ENSG00000284830	0.546565	-7.03141	1.46974	0.178441	0.237573	-5.50846	Gray
ENSG00000257027	0.544129	-8.29413	1.38159	0.203101	0.26439	-5.61883	Gray
TNFRSF11B	0.543455	-6.88071	1.28676	0.232858	0.29657	-5.73277	Gray
RAPH1	0.54343	-7.18056	0.833338	0.427952	0.49341	-6.19441	Gray
STX17	0.543288	-6.70052	1.16288	0.277179	0.343377	-5.8734	Gray
BRWD1	0.541281	-11.2596	1.22968	0.252487	0.317678	-5.79878	Gray
RHBDD1	0.539727	-6.77117	1.37767	0.20426	0.265432	-5.62363	Gray
TNFSF14	0.537607	-7.42897	1.70816	0.124572	0.178334	-5.19151	Gray
HOXA13	0.535805	-6.74352	1.80503	0.107314	0.157592	-5.05622	Gray
CCDC39	0.53139	-8.31668	1.37418	0.205302	0.266508	-5.62791	Gray
NECAB3	0.528662	-7.10509	0.980278	0.354619	0.421321	-6.06157	Gray
NEU3	0.52686	-6.12293	1.90372	0.0920572	0.138697	-4.9152	Gray
MCTP1	0.525768	-8.24789	1.2781	0.235751	0.29949	-5.74291	Gray
RBM19	0.525747	-9.16903	1.71866	0.122583	0.176381	-5.177	Gray
DUSP6	0.521638	-6.8862	1.17556	0.272345	0.338734	-5.85945	Gray
ZBTB16	0.521595	-12.0232	1.98366	0.081236	0.125191	-4.79893	Gray
MCTP2	0.520004	-5.95685	1.65712	0.134668	0.189183	-5.2614	Gray
EVPL	0.51977	-6.0175	1.76882	0.113486	0.165293	-5.10718	Gray
ZNF3	0.5192	-6.47788	1.80433	0.107429	0.157668	-5.0572	Gray
ADAM22	0.51642	-6.51668	1.06332	0.317554	0.384797	-5.97899	Gray
KCNJ12	0.516186	-6.2644	1.1821	0.269879	0.336338	-5.85222	Gray
MPC1-DT	0.515178	-8.06181	1.61901	0.142691	0.197786	-5.3129	Gray
MRRF	0.512974	-6.61777	0.75353	0.471937	0.537418	-6.25895	Gray
HAND2-AS1	0.51144	-5.6684	0.568554	0.584691	0.64095	-6.3863	Gray
TBC1D12	0.511061	-7.27001	1.5119	0.167611	0.22617	-5.45428	Gray
FAM153A	0.510764	-7.24928	1.68415	0.129232	0.183723	-5.22452	Gray
ZNF439	0.509912	-8.4968	1.66933	0.132187	0.186648	-5.24477	Gray
ENSG00000226849	0.507455	-7.07705	1.30444	0.227046	0.29064	-5.71192	Gray
ENSG00000274253	0.507222	-7.35162	1.43317	0.188334	0.247834	-5.55474	Gray
LIPA	0.5072	-6.58742	0.795013	0.448712	0.514256	-6.2261	Gray
SON	0.504662	-2.48839	0.292218	0.777283	0.815183	-6.51373	Gray
NF2	0.504175	-7.69378	1.68051	0.129951	0.184249	-5.22949	Gray
SLC9B1	0.503602	-8.00539	1.58742	0.149667	0.205968	-5.35513	Gray
POLI	0.503053	-7.19328	0.655756	0.529712	0.59107	-6.33026	Gray
FBXO16	0.500675	-6.43459	0.647506	0.534777	0.595922	-6.33587	Gray
RPP14	0.497193	-5.60863	0.702062	0.501825	0.565007	-6.29758	Gray
KIAA1549L	0.497082	-7.94224	1.73412	0.11971	0.172946	-5.15559	Gray
GALNTL6	0.49634	-6.29683	1.23937	0.249063	0.314161	-5.78772	Gray
HECTD2	0.495187	-6.1576	0.84008	0.424369	0.489732	-6.1887	Gray
LRRC49	0.492671	-7.23996	1.27449	0.236967	0.300575	-5.74713	Gray
ING3	0.489279	-5.55786	0.768489	0.463472	0.528744	-6.24728	Gray
ENSG00000285940	0.485964	-6.74533	1.07105	0.314261	0.381362	-5.97104	Gray
GBA3	0.478983	-7.2054	1.45524	0.182309	0.24179	-5.5269	Gray
MEF2C	0.478913	-7.11338	0.499243	0.630554	0.681348	-6.42556	Gray
FRAS1	0.477875	-12.6126	1.6451	0.137152	0.191491	-5.2777	Gray
AMDHD1	0.476669	-7.78399	1.47429	0.177244	0.236357	-5.50266	Gray
PRLR	0.476207	-6.00587	1.0877	0.307264	0.373962	-5.95378	Gray
MUC15	0.474995	-7.34643	1.68295	0.129468	0.183953	-5.22615	Gray
SETD7	0.47467	-6.43705	0.758212	0.469277	0.534632	-6.25532	Gray
LRRC3	0.472871	-7.21866	1.23496	0.250616	0.315961	-5.79276	Gray
KLHL24	0.471996	-9.00331	1.69385	0.127329	0.181431	-5.2112	Gray
ENSG00000229976	0.471604	-6.39574	1.10225	0.301245	0.368253	-5.93853	Gray
KIF1B	0.465581	-7.42407	1.37648	0.204614	0.265754	-5.62509	Gray
ADAM32	0.463265	-6.87216	1.08292	0.309257	0.375838	-5.95875	Gray
FMO4	0.463236	-5.22761	0.707628	0.498537	0.561811	-6.29352	Gray
ENSG00000228408	0.463084	-6.74622	1.29619	0.229741	0.293199	-5.72167	Gray
APH1B	0.463069	-4.88763	0.511094	0.622583	0.675074	-6.41918	Gray
RET	0.462608	-7.61743	1.29087	0.231497	0.294988	-5.72794	Gray
TTF2	0.458841	-6.07174	0.953337	0.36732	0.433726	-6.08723	Gray
FOXP4	0.458323	-11.8735	1.44444	0.185236	0.24466	-5.54055	Gray
LPXN	0.457706	-8.14903	1.44964	0.183821	0.243178	-5.53398	Gray
ENSG00000250378	0.456158	-7.23557	0.713369	0.495158	0.560027	-6.2893	Gray
SKA3	0.450101	-5.17806	0.436097	0.673873	0.721594	-6.45714	Gray
ENSG00000233757	0.449114	-8.08977	1.14775	0.283035	0.349591	-5.88989	Gray
GABRA3	0.446688	-7.41977	0.875321	0.405984	0.471789	-6.15826	Gray
MTCL1	0.445819	-6.72639	0.643332	0.537351	0.597723	-6.33868	Gray
ENSG00000285923	0.445295	-7.38239	1.16215	0.277459	0.343554	-5.8742	Gray
SLC26A5-AS1	0.441325	-7.46783	1.20223	0.262408	0.328833	-5.8298	Gray
ARMCX5-GPRASP2	0.44047	-8.97902	0.648233	0.53433	0.59569	-6.33538	Gray
DSP	0.440196	-6.49332	0.65827	0.528175	0.59041	-6.32853	Gray
PTPN4	0.438764	-6.07153	0.837009	0.425999	0.491385	-6.19131	Gray
RNF138	0.437688	-6.77927	0.971765	0.358596	0.425183	-6.06974	Gray
TMEM182	0.433698	-12.4868	1.26016	0.241842	0.305982	-5.76378	Gray
FREM1	0.43315	-10.3325	1.42594	0.190346	0.250085	-5.56381	Gray
ITPR2	0.433082	-7.3855	1.29281	0.230854	0.294469	-5.72565	Gray
ENSG00000285853	0.430999	-6.82683	0.699425	0.503388	0.566511	-6.29949	Gray
SLC26A9	0.430748	-7.20109	0.847298	0.420557	0.485558	-6.18255	Gray
AKAP6	0.429434	-6.22574	1.17732	0.271682	0.33812	-5.85752	Gray
NR2F2-AS1	0.427215	-6.86798	0.973219	0.357915	0.42463	-6.06834	Gray
CCDC60	0.426831	-6.37324	0.917416	0.384774	0.451557	-6.12054	Gray
SLC4A8	0.426803	-10.8026	1.34473	0.214256	0.276835	-5.66373	Gray
TCF7L2	0.426615	-4.2562	0.220442	0.830846	0.858369	-6.53378	Gray
AQP7	0.421379	-9.86049	1.51833	0.166011	0.224618	-5.44594	Gray
ZNF280D	0.421114	-5.78144	0.535057	0.606626	0.662088	-6.40586	Gray
IGF2R	0.420727	-7.23784	0.918465	0.384255	0.451161	-6.11958	Gray
SRSF5	0.419901	-6.66904	0.783083	0.455311	0.520925	-6.2357	Gray
SGO1	0.417636	-4.41938	0.31076	0.763634	0.80391	-6.50766	Gray
FCGR2B	0.414422	-6.34648	1.20239	0.262347	0.328833	-5.82961	Gray
PRICKLE3	0.411412	-7.62641	1.15393	0.280631	0.346793	-5.88317	Gray
WNT2B	0.410581	-6.71012	1.06585	0.316473	0.383674	-5.97639	Gray
CA5B	0.410375	-7.43129	1.27578	0.236532	0.300329	-5.74562	Gray
TMEM156	0.406091	-11.7322	1.34503	0.214163	0.276835	-5.66336	Gray
ATPSCKMT	0.40442	-8.16767	0.898006	0.394452	0.460533	-6.13812	Gray
[truncated: 497 more rows]

## Sheet: Table S11.2
Table S11.2 GO analysis of genes with increased proximal PAS usage (W7 vs Skin) in FB-prolif (related to Figure 6G)
ID	Description	GeneRatio	BgRatio	pvalue	p.adjust	qvalue	geneID	Count
GO:0043122	regulation of canonical NF-kappaB signal transduction	22/967	26/1831	0.000670237	0.999326	0.999326	TMEM9B/TLR4/STAT1/IRAK4/TRIM52/ATP2C1/NDFIP2/FBXW11/MAVS/PRKD1/MAP3K7/SIRT1/TANK/ZDHHC17/CANT1/CARD8/TRIM13/ANGPT1/SLC20A1/GPRC5B/PPM1A/IKBKB	22
GO:1990542	mitochondrial transmembrane transport	10/967	10/1831	0.00165119	0.999326	0.999326	SLC25A37/PSEN2/CPT1A/SFXN5/PNPT1/SFXN2/SLC25A40/SLC25A13/SLC25A32/SFXN1	10
GO:0043123	positive regulation of canonical NF-kappaB signal transduction	17/967	20/1831	0.00268289	0.999326	0.999326	TMEM9B/TLR4/IRAK4/TRIM52/ATP2C1/NDFIP2/FBXW11/MAVS/PRKD1/MAP3K7/ZDHHC17/CANT1/TRIM13/SLC20A1/GPRC5B/PPM1A/IKBKB	17
GO:0007249	canonical NF-kappaB signal transduction	23/967	29/1831	0.00279617	0.999326	0.999326	TMEM9B/TLR4/STAT1/IRAK4/TRIM52/ATP2C1/NDFIP2/FBXW11/MAVS/PRKD1/MAP3K7/SIRT1/TIFAB/TANK/ZDHHC17/CANT1/CARD8/TRIM13/ANGPT1/SLC20A1/GPRC5B/PPM1A/IKBKB	23
GO:0007612	learning	16/967	19/1831	0.00439471	0.999326	0.999326	HTT/HRH1/ABCA7/KMT2A/YTHDF1/BRAF/SLC6A1/FOXB1/RAPGEF3/ADGRB3/TAFA2/SYT11/MECP2/NETO1/SPECC1/ATXN1	16
GO:0065009	regulation of molecular function	133/967	217/1831	0.00462558	0.999326	0.999326	WWTR1/TTBK2/SIRT3/BDNF/FMR1/HTT/G3BP2/SERPINB8/RNF2/RAD50/WWP2/ERRFI1/HGF/PSEN2/TP53BP1/ETFBKMT/RPTOR/ARHGAP6/RAP2C/GNA12/NPM1/TLR4/ATP1B2/SOS1/BCL2/POR/SYK/FOXL2/ADARB1/SH3BP4/TIAM1/ADORA3/BHLHE40/ACTN2/SPRED1/HEY2/CAND1/JPH2/PTPN1/TCAF1/FGF10/THY1/SNX18/FEM1B/PINX1/PSME3IP1/USP9X/NEK10/EIF2AK2/ACE/ADRA2A/IPO7/TRIM52/USP50/GPD1L/RGS6/USP44/HEYL/RBL1/CBLB/SLC24A4/DLGAP2/EPHA5/WNK2/PTPRQ/NDFIP2/RI…	133
GO:0008306	associative learning	11/967	12/1831	0.00539917	0.999326	0.999326	HRH1/ABCA7/KMT2A/BRAF/SLC6A1/FOXB1/RAPGEF3/TAFA2/MECP2/NETO1/SPECC1	11
GO:0051641	cellular localization	258/967	444/1831	0.00590364	0.999326	0.999326	WWTR1/TTBK2/INSIG1/SYS1/NECTIN3/MFF/SIRT3/LMAN2/BDNF/FMR1/HTT/MID1/VIPAS39/MX2/G3BP2/VIP/THEM4/HK1/TBC1D24/SORBS1/WWP2/VTI1A/STAU2/ERLEC1/TTC21B/ACSL3/EXOC7/SPDL1/ABCA7/SYNRG/KCNAB2/LRPPRC/TOMM22/TRAK2/PTPRK/SNX25/NPM1/YWHAQ/SLC9B2/TMEM167A/RAB33B/BICD2/GORASP2/RAB36/TLR4/UTP25/AFTPH/SPAST/YOD1/SFT2D3/BRAF/AP3B2/VPS36/CPT1A/SLC6A1/SNX22/BCL2/SYK/MPP7/CC2D2B/ABCC4/SH3BP4/TTC7A/SLC7A6OS/VAMP4/KIAA1…	258
GO:0051493	regulation of cytoskeleton organization	45/967	66/1831	0.00719264	0.999326	0.999326	TTBK2/MID1/STAU2/ARHGAP6/SEMA5A/RICTOR/NPM1/FCHSD1/BICD2/SPAST/EPS8/BRAF/TBCD/ARPIN/GPSM2/ACTN2/ALMS1/WDR1/RHPN2/ARPC5L/NEXN/EPHA5/CAPN10/PRKD1/TRIM36/FMN1/RAPGEF3/TMEM67/MPDZ/GPR65/WHAMM/HDAC6/TRIM54/LMOD1/DIXDC1/ATXN7/ARHGAP40/AKAP9/ANKRD23/MECP2/MDM1/MARK2/BORA/ARFGEF1/MYO3B	45
GO:0033036	macromolecule localization	221/967	378/1831	0.00779502	0.999326	0.999326	WWTR1/TTBK2/INSIG1/SYS1/NECTIN3/MFF/SIRT3/LMAN2/BDNF/FMR1/MID1/VIPAS39/MX2/G3BP2/VIP/HK1/SORBS1/WWP2/VTI1A/STAU2/ERLEC1/TTC21B/ACSL3/EXOC7/SPDL1/ABCA7/SYNRG/RBP5/KCNAB2/ATP8B2/LRPPRC/TOMM22/TRAK2/PTPRK/SNX25/NPM1/YWHAQ/SLC9B2/TMEM167A/RAB33B/BICD2/GORASP2/RAB36/MAP2K6/TLR4/UTP25/AFTPH/YOD1/SFT2D3/BRAF/AP3B2/FABP5P3/VPS36/CPT1A/SNX22/BCL2/SYK/SLCO2A1/MPP7/CC2D2B/ABCC4/SH3BP4/TTC7A/SLC7A6OS/TIAM1/G…	221
GO:0008104	protein localization	195/967	331/1831	0.00818204	0.999326	0.999326	WWTR1/TTBK2/INSIG1/SYS1/NECTIN3/MFF/SIRT3/LMAN2/BDNF/MID1/VIPAS39/MX2/G3BP2/VIP/HK1/SORBS1/WWP2/VTI1A/STAU2/ERLEC1/TTC21B/ACSL3/EXOC7/SPDL1/ABCA7/SYNRG/KCNAB2/TOMM22/TRAK2/PTPRK/SNX25/NPM1/YWHAQ/SLC9B2/TMEM167A/RAB33B/BICD2/GORASP2/RAB36/TLR4/UTP25/AFTPH/YOD1/SFT2D3/BRAF/AP3B2/VPS36/CPT1A/SNX22/BCL2/SYK/MPP7/CC2D2B/SH3BP4/TTC7A/SLC7A6OS/TIAM1/GPSM2/CANX/GLRB/FCHO2/KCNQ3/TOLLIP/SNX1/ACTN2/SPIRE1/H…	195
GO:0042542	response to hydrogen peroxide	10/967	11/1831	0.00948549	0.999326	0.999326	BCL2/KDM6B/STAT1/BECN1/SOD2/TOP2B/SIRT1/SETX/HDAC6/NET1	10
GO:0070727	cellular macromolecule localization	195/967	332/1831	0.00981683	0.999326	0.999326	WWTR1/TTBK2/INSIG1/SYS1/NECTIN3/MFF/SIRT3/LMAN2/BDNF/MID1/VIPAS39/MX2/G3BP2/VIP/HK1/SORBS1/WWP2/VTI1A/STAU2/ERLEC1/TTC21B/ACSL3/EXOC7/SPDL1/ABCA7/SYNRG/KCNAB2/TOMM22/TRAK2/PTPRK/SNX25/NPM1/YWHAQ/SLC9B2/TMEM167A/RAB33B/BICD2/GORASP2/RAB36/TLR4/UTP25/AFTPH/YOD1/SFT2D3/BRAF/AP3B2/VPS36/CPT1A/SNX22/BCL2/SYK/MPP7/CC2D2B/SH3BP4/TTC7A/SLC7A6OS/TIAM1/GPSM2/CANX/GLRB/FCHO2/KCNQ3/TOLLIP/SNX1/ACTN2/SPIRE1/H…	195
GO:0043086	negative regulation of catalytic activity	30/967	42/1831	0.010152	0.999326	0.999326	WWTR1/SERPINB8/ERRFI1/HGF/ETFBKMT/NPM1/ADARB1/SH3BP4/SPRED1/CAND1/PTPN1/THY1/PINX1/IPO7/USP44/CBLB/PTPRQ/SIRT1/SH3RF1/GPRC5A/HDAC6/CAAP1/SNX6/CARD8/CAST/RGS2/GFI1/ATP2B4/ARFGEF1/IKBKB	30
GO:0044092	negative regulation of molecular function	51/967	77/1831	0.0103713	0.999326	0.999326	WWTR1/TTBK2/FMR1/G3BP2/SERPINB8/RNF2/WWP2/ERRFI1/HGF/ETFBKMT/NPM1/ADARB1/SH3BP4/ADORA3/BHLHE40/ACTN2/SPRED1/HEY2/CAND1/PTPN1/THY1/PINX1/PSME3IP1/ADRA2A/IPO7/USP44/HEYL/CBLB/PTPRQ/NDFIP2/RIPOR2/ERBIN/SIRT1/SH3RF1/GPRC5A/SUMO3/HDAC6/HMGA2/ZFPM1/CAAP1/HFE/SNX6/TAF3/CARD8/CAST/ATP2A2/RGS2/GFI1/ATP2B4/ARFGEF1/IKBKB	51
GO:0051495	positive regulation of cytoskeleton organization	16/967	20/1831	0.011242	0.999326	0.999326	SEMA5A/RICTOR/FCHSD1/SPAST/BRAF/GPSM2/ACTN2/WDR1/PRKD1/FMN1/RAPGEF3/GPR65/WHAMM/LMOD1/AKAP9/MECP2	16
GO:1902903	regulation of supramolecular fiber organization	31/967	44/1831	0.0122899	0.999326	0.999326	TTBK2/MID1/ARHGAP6/SEMA5A/RICTOR/FCHSD1/SPAST/EPS8/BRAF/TBCD/ARPIN/ACTN2/ALMS1/WDR1/RHPN2/ARPC5L/PRKD1/FMN1/RAPGEF3/GPR65/WHAMM/HDAC6/TRIM54/LMOD1/ATXN7/ARHGAP40/AKAP9/ANKRD23/MECP2/ARFGEF1/VBP1	31
GO:0071702	organic substance transport	209/967	360/1831	0.0150789	0.999326	0.999326	INSIG1/SYS1/MFF/SIRT3/LMAN2/FMR1/HTT/VIPAS39/MX2/G3BP2/VIP/SLC24A1/SORBS1/WWP2/VTI1A/ERLEC1/SLC38A3/ACSL3/SLC7A6/PSEN2/EXOC7/ABCA7/SYNRG/RBP5/ATP8B2/LRPPRC/TOMM22/TRAK2/SNX25/NPM1/SEC14L1/YWHAQ/SLC9B2/TMEM167A/RAB33B/BICD2/RAB36/MAP2K6/TLR4/AFTPH/YOD1/SFT2D3/BRAF/AP3B2/FABP5P3/VPS36/CPT1A/SLC6A1/SNX22/BCL2/SYK/SLCO2A1/ABCC4/SLC7A6OS/TIAM1/CANX/ADORA3/KCNQ3/KHDRBS1/SNX1/SPIRE1/XCR1/JPH2/GULP1/KIF3…	209
GO:0006405	RNA export from nucleus	9/967	10/1831	0.0165429	0.999326	0.999326	FMR1/NPM1/KHDRBS1/POLDIP3/YTHDC1/NCBP1/NCBP2/AGFG1/THOC3	9
GO:1902905	positive regulation of supramolecular fiber organization	15/967	19/1831	0.0174276	0.999326	0.999326	SEMA5A/RICTOR/FCHSD1/SPAST/BRAF/ACTN2/WDR1/PRKD1/FMN1/RAPGEF3/GPR65/WHAMM/LMOD1/AKAP9/MECP2	15
GO:0006413	translational initiation	11/967	13/1831	0.0182984	0.999326	0.999326	FMR1/EIF4E3/METTL3/NPM1/YTHDF1/BZW2/LTO1/KHDRBS1/UHMK1/NCBP1/NCBP2	11
GO:0007186	G protein-coupled receptor signaling pathway	43/967	65/1831	0.0186155	0.999326	0.999326	VIP/GPR63/HRH1/GPRC5C/ACP3/GNA12/GPSM2/GLRB/ADORA3/ACTN2/XCR1/GPR179/GRK3/ADRA2A/RGS6/GIT2/SORCS1/SLC24A4/DGKE/RGS17/PTHLH/PSAPL1/ADGRG5/FZD1/GPRC5A/GNAL/GPR65/PTGFR/ACKR2/ADGRB3/CCR5/RGS5/RRH/RGS20/GPR160/GPR141/GPRASP1/GNAZ/RGS2/GPR34/APLNR/ATP2B4/GPRC5B	43
GO:0071705	nitrogen compound transport	167/967	285/1831	0.0193101	0.999326	0.999326	INSIG1/SYS1/MFF/SIRT3/LMAN2/FMR1/VIPAS39/MX2/G3BP2/VIP/WWP2/VTI1A/ERLEC1/SLC38A3/ACSL3/SLC7A6/EXOC7/SYNRG/LRPPRC/TOMM22/TRAK2/SNX25/NPM1/SEC14L1/YWHAQ/SLC9B2/TMEM167A/RAB33B/BICD2/RAB36/TLR4/AFTPH/YOD1/SFT2D3/AP3B2/VPS36/CPT1A/SLC6A1/SNX22/SYK/ABCC4/SLC7A6OS/TIAM1/CANX/ADORA3/KCNQ3/KHDRBS1/SNX1/SPIRE1/KIF3A/PTPN1/TCAF1/ZDHHC2/ZDHHC11/ZMAT3/IFT22/SNX18/AQP9/SLC25A16/BECN1/SLC22A5/CD209/USP9X/ADRA2…	167
GO:0018105	peptidyl-serine phosphorylation	23/967	32/1831	0.0213386	0.999326	0.999326	TTBK2/BDNF/HGF/DYRK2/RPTOR/RICTOR/BRAF/BCL2/IP6K2/MAST4/GPD1L/UHMK1/VRK3/PRKD1/HDAC6/CAMK4/CAMK2B/AKAP9/ANGPT1/MARK2/ATP2B4/MYO3B/IKBKB	23
GO:0045859	regulation of protein kinase activity	32/967	47/1831	0.0230292	0.999326	0.999326	WWTR1/HTT/ERRFI1/RPTOR/RAP2C/NPM1/TLR4/ADARB1/SPRED1/PTPN1/THY1/NEK10/ACE/ADRA2A/IPO7/CBLB/PTPRQ/MAP3K7/SIRT1/CACUL1/GPRC5A/HMGA2/STRADB/SNX6/SLC11A1/ANGPT1/RGS2/MARK2/CASS4/BORA/ATP2B4/GPRC5B	32
GO:0050657	nucleic acid transport	16/967	21/1831	0.0242484	0.999326	0.999326	FMR1/MX2/G3BP2/LRPPRC/NPM1/BICD2/KHDRBS1/PNPT1/POLDIP3/YTHDC1/RBFOX1/NCBP1/NCBP2/AHCTF1/AGFG1/THOC3	16
GO:0050658	RNA transport	16/967	21/1831	0.0242484	0.999326	0.999326	FMR1/MX2/G3BP2/LRPPRC/NPM1/BICD2/KHDRBS1/PNPT1/POLDIP3/YTHDC1/RBFOX1/NCBP1/NCBP2/AHCTF1/AGFG1/THOC3	16
GO:0051236	establishment of RNA localization	16/967	21/1831	0.0242484	0.999326	0.999326	FMR1/MX2/G3BP2/LRPPRC/NPM1/BICD2/KHDRBS1/PNPT1/POLDIP3/YTHDC1/RBFOX1/NCBP1/NCBP2/AHCTF1/AGFG1/THOC3	16
GO:0065004	protein-DNA complex assembly	16/967	21/1831	0.0242484	0.999326	0.999326	TCF4/NPM1/UBTF/HEY2/CAND1/THRA/H3C6/GRWD1/TAF3/KAT6B/H2BC6/BDP1/SET/UBN1/GTF2A1/MED17	16
GO:0007018	microtubule-based movement	39/967	59/1831	0.0249948	0.999326	0.999326	HTT/STAU2/TTC21B/LRPPRC/TRAK2/SLC9B2/BICD2/SPAST/AP3B2/WDR35/DYNC1LI2/KIF3A/IFT22/KLC1/BICDL1/NEK10/KIF16B/KIF15/RPGR/SPG7/RFX3/FBXW11/TMEM108/RABL2B/JHY/STARD9/CATSPERE/SSX2IP/CCDC65/HDAC6/AP3M2/DNHD1/MECP2/NETO1/DNAAF11/ATP2B4/DNAH9/SPG11/TMEM201	39
GO:0050790	regulation of catalytic activity	86/967	141/1831	0.0259383	0.999326	0.999326	WWTR1/SIRT3/HTT/SERPINB8/RAD50/ERRFI1/HGF/PSEN2/ETFBKMT/RPTOR/ARHGAP6/RAP2C/GNA12/NPM1/TLR4/SOS1/POR/SYK/FOXL2/ADARB1/SH3BP4/TIAM1/ADORA3/SPRED1/CAND1/PTPN1/THY1/SNX18/FEM1B/PINX1/NEK10/ACE/ADRA2A/IPO7/USP50/RGS6/USP44/RBL1/CBLB/EPHA5/PTPRQ/RIPOR2/GARNL3/PRKD1/APAF1/MAP3K7/RAPGEF3/SIRT1/SH3RF1/TANK/CACUL1/GPRC5A/STIM1/GPR65/HDAC6/HMGA2/PKP4/CAAP1/STRADB/ARHGAP27/ITGB2/SNX6/WDR91/CARD8/CAST/SLC11A…	86
GO:0018209	peptidyl-serine modification	24/967	34/1831	0.0259388	0.999326	0.999326	TTBK2/BDNF/HGF/DYRK2/RPTOR/RICTOR/BRAF/BCL2/IP6K2/MAST4/GPD1L/UHMK1/VRK3/PRKD1/HDAC6/CAMK4/POGLUT1/CAMK2B/AKAP9/ANGPT1/MARK2/ATP2B4/MYO3B/IKBKB	24
GO:0061097	regulation of protein tyrosine kinase activity	10/967	12/1831	0.0299171	0.999326	0.999326	ERRFI1/RAP2C/PTPN1/ACE/ADRA2A/CBLB/GPRC5A/SNX6/CASS4/GPRC5B	10
GO:0001934	positive regulation of protein phosphorylation	42/967	65/1831	0.0340241	0.999326	0.999326	BDNF/FMR1/RAD50/HGF/RPTOR/RAP2C/RICTOR/MAP2K6/TLR4/BRAF/BCL2/SYK/IP6K2/PTPN1/FGF10/NEK10/ACE/ADRA2A/MAVS/PRKD1/MAP3K7/SIRT1/FZD1/SLCO3A1/CACUL1/TNFSF18/HDAC6/HMGA2/STRADB/WDFY2/NIBAN1/FGF9/SLC11A1/AKAP9/ANGPT1/MARK2/MUSK/APLNR/CASS4/BORA/ATP2B4/GPRC5B	42
GO:0044093	positive regulation of molecular function	87/967	144/1831	0.0341814	0.999326	0.999326	SIRT3/BDNF/FMR1/HTT/RAD50/PSEN2/TP53BP1/RPTOR/ARHGAP6/GNA12/NPM1/TLR4/ATP1B2/SOS1/POR/SYK/FOXL2/TIAM1/ADORA3/ACTN2/JPH2/PTPN1/TCAF1/FGF10/THY1/SNX18/PINX1/USP9X/NEK10/EIF2AK2/ACE/ADRA2A/TRIM52/USP50/RGS6/EPHA5/WNK2/RIPOR2/GARNL3/MAVS/PRKD1/APAF1/MAP3K7/RAPGEF3/SIRT1/TANK/FZD1/SLCO3A1/CACUL1/TNFSF18/STIM1/DNAJC10/GPR65/HDAC6/HMGA2/PKP4/STRADB/HFE/ARHGAP27/ITGB2/CARD8/SLC11A1/TRIM13/TOR1AIP1/PPARGC…	87
GO:0015931	nucleobase-containing compound transport	23/967	33/1831	0.0357809	0.999326	0.999326	FMR1/MX2/G3BP2/LRPPRC/NPM1/BICD2/ABCC4/KHDRBS1/SLC25A16/SLC19A1/SLC35A5/PNPT1/POLDIP3/SLC29A4/SLC35A3/YTHDC1/RBFOX1/NCBP1/SLC25A32/NCBP2/AHCTF1/AGFG1/THOC3	23
GO:0071363	cellular response to growth factor stimulus	50/967	79/1831	0.0358973	0.999326	0.999326	BDNF/CCBE1/ZNF451/HGF/GAB1/KMT2A/PTPRK/SNX25/STK16/TLR4/BRAF/SOS1/SPRED1/DYNC1LI2/WWOX/PTPN1/FGF10/BECN1/USP9X/KIF16B/SHCBP1/HEYL/ZEB2/EPN2/ING1/TMEM108/TFAP2B/PRKD1/APAF1/MAP3K7/SIRT1/ZDHHC17/FZD1/SETX/SIN3A/ITGA3/SLC4A7/HFE/SNX6/FGF9/SINHCAF/FSTL4/RBBP7/SULF1/FGFBP3/ZFYVE27/STAT5B/ATP2B4/PPM1A/SMURF2	50
GO:0051494	negative regulation of cytoskeleton organization	15/967	20/1831	0.0359843	0.999326	0.999326	TTBK2/MID1/ARHGAP6/NPM1/EPS8/TBCD/ARPIN/RHPN2/TMEM67/HDAC6/TRIM54/LMOD1/ATXN7/MDM1/ARFGEF1	15
GO:0070848	response to growth factor	51/967	81/1831	0.0387261	0.999326	0.999326	BDNF/CCBE1/ZNF451/HGF/GAB1/KMT2A/PTPRK/SNX25/STK16/TLR4/BRAF/SOS1/SPRED1/DYNC1LI2/WWOX/PTPN1/FGF10/BECN1/USP9X/KIF16B/SHCBP1/HEYL/ZEB2/EPN2/ING1/TMEM108/TFAP2B/PRKD1/APAF1/MAP3K7/SIRT1/ZDHHC17/FZD1/SETX/SIN3A/ITGA3/HDAC6/SLC4A7/HFE/SNX6/FGF9/SINHCAF/FSTL4/RBBP7/SULF1/FGFBP3/ZFYVE27/STAT5B/ATP2B4/PPM1A/SMURF2	51
GO:0050792	regulation of viral process	13/967	17/1831	0.0404368	0.999326	0.999326	FMR1/APOBEC3D/APOBEC3F/BCL2/ADARB1/NECTIN2/STAT1/CD209/EIF2AK2/MAVS/TOP2B/HMGA2/TRIM13	13
GO:0098742	cell-cell adhesion via plasma-membrane adhesion molecules	13/967	17/1831	0.0404368	0.999326	0.999326	NECTIN3/SELL/NECTIN2/CD209/ATP2C1/NEXN/ITGA3/ITGB2/FAT4/IGSF11/FAT3/NECTIN1/CADM2	13
GO:1902904	negative regulation of supramolecular fiber organization	13/967	17/1831	0.0404368	0.999326	0.999326	TTBK2/MID1/ARHGAP6/EPS8/TBCD/ARPIN/RHPN2/HDAC6/TRIM54/LMOD1/ATXN7/ARFGEF1/VBP1	13
GO:0030705	cytoskeleton-dependent intracellular transport	27/967	40/1831	0.041451	0.999326	0.999326	HTT/STAU2/TTC21B/LRPPRC/TRAK2/BICD2/SPAST/AP3B2/WDR35/KIF3A/IFT22/BICDL1/RPGR/SPG7/FBXW11/TMEM108/RABL2B/MYO10/TANC2/SSX2IP/HDAC6/PPFIA2/AP3M2/MECP2/NETO1/SPG11/TMEM201	27
GO:0010970	transport along microtubule	24/967	35/1831	0.0419197	0.999326	0.999326	HTT/STAU2/TTC21B/LRPPRC/TRAK2/BICD2/SPAST/AP3B2/WDR35/KIF3A/IFT22/BICDL1/RPGR/SPG7/FBXW11/TMEM108/RABL2B/SSX2IP/HDAC6/AP3M2/MECP2/NETO1/SPG11/TMEM201	24
GO:0055085	transmembrane transport	107/967	181/1831	0.0432074	0.999326	0.999326	FMR1/HTT/SLC24A1/SORBS1/WWP2/SLC9A7/SLC25A37/SLC38A3/SLC7A6/PSEN2/ABCA7/KCNAB2/ATP8B2/TOMM22/YWHAQ/SLC9B2/ATP1B2/BRAF/CPT1A/SLC6A1/GJC1/ANO5/BCL2/SLCO2A1/ABCC4/GLRB/KCNQ3/ACTN2/XCR1/JPH2/ATP6V1B2/TCAF1/ABCC9/THY1/SLC16A7/AQP9/GABRA2/SLC25A16/SLC22A5/USP9X/ACE/ADRA2A/ATP2C1/SFXN5/GPD1L/ATP4B/NCS1/SLC19A1/SLC35A5/SLC24A4/WNK2/SLC6A6/SLC1A2/GABRR2/CAPN10/PRKD1/SHROOM2/STXBP4/KCNA1/KCNJ13/SLC37A3/SLC…	107
GO:0008277	regulation of G protein-coupled receptor signaling pathway	11/967	14/1831	0.0448016	0.999326	0.999326	ACP3/GRK3/RGS6/GIT2/SLC24A4/RGS5/RGS20/GPRASP1/RGS2/APLNR/ATP2B4	11
GO:0062207	regulation of pattern recognition receptor signaling pathway	11/967	14/1831	0.0448016	0.999326	0.999326	IRF4/SEC14L1/TLR4/EIF2AK2/SMPDL3B/USP50/ERBIN/MAVS/PRKD1/CARD8/GFI1	11
GO:1903900	regulation of viral life cycle	11/967	14/1831	0.0448016	0.999326	0.999326	FMR1/APOBEC3D/APOBEC3F/BCL2/ADARB1/NECTIN2/CD209/EIF2AK2/MAVS/TOP2B/HMGA2	11
GO:0007610	behavior	46/967	73/1831	0.0475571	0.999326	0.999326	BDNF/HTT/VIP/HRH1/TTC21B/ABCA7/RPTOR/KMT2A/AFF2/YTHDF1/ATP1B2/EPS8/BRAF/CPT1A/SLC6A1/BCL2/ADARB1/GLRB/KCNQ3/IDO1/THRA/TMEM18/HOXB8/FIG4/ACE/SLC24A4/SLC1A2/SOD2/FOXB1/RAPGEF3/TIFAB/ITGA3/ADGRB3/CAMK4/TAFA2/ALDH1A3/SYT11/STRN/MECP2/NETO1/UBR3/MUSK/SPECC1/ETV1/ATXN1/SPG11	46
GO:0045184	establishment of protein localization	131/967	225/1831	0.0477649	0.999326	0.999326	INSIG1/SYS1/NECTIN3/MFF/SIRT3/LMAN2/VIPAS39/MX2/VIP/HK1/WWP2/VTI1A/ERLEC1/ACSL3/EXOC7/SYNRG/TOMM22/TRAK2/SNX25/NPM1/YWHAQ/SLC9B2/TMEM167A/RAB33B/BICD2/GORASP2/RAB36/TLR4/AFTPH/YOD1/SFT2D3/BRAF/AP3B2/VPS36/CPT1A/SNX22/SYK/SLC7A6OS/TIAM1/CANX/KCNQ3/SNX1/SPIRE1/KIF3A/PTPN1/TCAF1/ZDHHC2/ZDHHC11/ZMAT3/IFT22/SNX18/BECN1/USP9X/ADRA2A/IPO7/ATP2C1/UBE2J1/RPGR/WHRN/VPS41/STX7/SNX7/STXBP5/STX18/CBLB/EXOC2/R…	131
GO:0044089	positive regulation of cellular component biogenesis	35/967	54/1831	0.0480895	0.999326	0.999326	BDNF/FMR1/HTT/G3BP2/CAPRIN1/STAU2/RICTOR/FCHSD1/TLR4/EPS8/BRAF/SYK/MPP7/GPSM2/SETDB2/CAND1/THY1/SNX18/BECN1/USP50/SNX7/STX18/RIPOR2/MAVS/PRKD1/FMN1/ST8SIA2/RAPGEF3/PLEKHM1/GPR65/ADGRB3/LMOD1/AKAP9/MECP2/MYO3B	35
GO:0007611	learning or memory	25/967	37/1831	0.0482958	0.999326	0.999326	BDNF/HTT/VIP/HRH1/ABCA7/KMT2A/AFF2/YTHDF1/BRAF/SLC6A1/THRA/FOXB1/RAPGEF3/TIFAB/ITGA3/ADGRB3/CAMK4/TAFA2/SYT11/MECP2/NETO1/MUSK/SPECC1/ATXN1/SPG11	25
GO:0006446	regulation of translational initiation	9/967	11/1831	0.0483013	0.999326	0.999326	FMR1/METTL3/NPM1/YTHDF1/BZW2/KHDRBS1/UHMK1/NCBP1/NCBP2	9
GO:0016239	positive regulation of macroautophagy	9/967	11/1831	0.0483013	0.999326	0.999326	HTT/SNX18/BECN1/SNX7/MAP3K7/SIRT1/EPM2A/SPTLC1/TRIM13	9
GO:0048041	focal adhesion assembly	9/967	11/1831	0.0483013	0.999326	0.999326	SORBS1/ARHGAP6/PTPRK/BCL2/ACTN2/THY1/FMN1/WHAMM/PTPRA	9
GO:0099111	microtubule-based transport	29/967	44/1831	0.0528517	0.999326	0.999326	HTT/STAU2/TTC21B/LRPPRC/TRAK2/BICD2/SPAST/AP3B2/WDR35/KIF3A/IFT22/BICDL1/NEK10/RPGR/SPG7/RFX3/FBXW11/TMEM108/RABL2B/JHY/SSX2IP/HDAC6/AP3M2/MECP2/NETO1/DNAAF11/DNAH9/SPG11/TMEM201	29
GO:0032956	regulation of actin cytoskeleton organization	26/967	39/1831	0.0548645	0.999326	0.999326	STAU2/ARHGAP6/SEMA5A/RICTOR/FCHSD1/EPS8/BRAF/ARPIN/ACTN2/ALMS1/WDR1/RHPN2/ARPC5L/EPHA5/CAPN10/PRKD1/FMN1/RAPGEF3/GPR65/WHAMM/LMOD1/DIXDC1/ARHGAP40/ANKRD23/ARFGEF1/MYO3B	26
GO:0090092	regulation of transmembrane receptor protein serine/threonine kinase signaling pathway	20/967	29/1831	0.0569774	0.999326	0.999326	IGSF1/ZNF451/SNX25/SPRED1/FGF10/ZEB2/ING1/TFAP2B/SIRT1/FZD1/SIN3A/ITGA3/SNX6/FGF9/SINHCAF/FSTL4/RBBP7/SULF1/PPM1A/SMURF2	20
GO:0010508	positive regulation of autophagy	12/967	16/1831	0.0603718	0.999326	0.999326	HTT/SH3BP4/SNX18/BECN1/RNF152/SNX7/PRKD1/MAP3K7/SIRT1/EPM2A/SPTLC1/TRIM13	12
GO:0090398	cellular senescence	12/967	16/1831	0.0603718	0.999326	0.999326	NPM1/MAP2K6/VASH1/EEF1E1/PRELP/MAPK10/RBL1/TOP2B/SIRT1/PNPT1/ARG2/HMGA2	12
GO:0030001	metal ion transport	67/967	111/1831	0.0606741	0.999326	0.999326	FMR1/HTT/VIP/SLC24A1/WWP2/SLC9A7/SLC25A37/SLC38A3/PSEN2/KCNAB2/SLC9B2/ATP1B2/SLC6A1/BCL2/KCNQ3/ACTN2/XCR1/JPH2/ABCC9/THY1/NKAIN3/SLC22A5/ACE/ADRA2A/ATP2C1/GPD1L/ATP4B/NCS1/SLC24A4/WNK2/SLC6A6/NDFIP2/PRKD1/SHROOM2/KCNA1/KCNJ13/SLC5A2/SLC6A13/TRPM6/CABP4/STIM1/CCR5/SLC10A7/SLC4A7/HFE/GRIN3A/KCNQ5/MCOLN2/SLC11A1/ATP2A2/KCNN3/KCNT2/CAMK2B/AKAP9/NETO1/ISCU/UBR3/SFXN1/SLC20A1/KCNC4/NECTIN1/APLNR/DNM1L/…	67
GO:0051649	establishment of localization in cell	164/967	287/1831	0.0620938	0.999326	0.999326	INSIG1/SYS1/MFF/LMAN2/FMR1/HTT/VIPAS39/MX2/THEM4/TBC1D24/VTI1A/STAU2/ERLEC1/TTC21B/EXOC7/SPDL1/SYNRG/LRPPRC/TOMM22/TRAK2/NPM1/YWHAQ/SLC9B2/TMEM167A/BICD2/AFTPH/SPAST/YOD1/BRAF/AP3B2/VPS36/CPT1A/SLC6A1/BCL2/SYK/ABCC4/VAMP4/TIAM1/GPSM2/CANX/FCHO2/KCNQ3/EPS15L1/KHDRBS1/SNX1/ACTN2/SPIRE1/WDR35/NECTIN2/KIF3A/ATP6V1B2/PTPN1/ALMS1/TCAF1/FGF10/ZDHHC2/HGSNAT/ZDHHC11/TPH1/IFT22/SNX18/MCPH1/WWC1/SLC25A16/PI…	164
GO:0015031	protein transport	125/967	216/1831	0.0649065	0.999326	0.999326	INSIG1/SYS1/MFF/SIRT3/LMAN2/VIPAS39/MX2/VIP/WWP2/VTI1A/ERLEC1/ACSL3/EXOC7/SYNRG/TOMM22/TRAK2/SNX25/NPM1/YWHAQ/SLC9B2/TMEM167A/RAB33B/BICD2/RAB36/TLR4/AFTPH/YOD1/SFT2D3/AP3B2/VPS36/CPT1A/SNX22/SYK/SLC7A6OS/TIAM1/CANX/KCNQ3/SNX1/SPIRE1/KIF3A/PTPN1/TCAF1/ZDHHC2/ZDHHC11/ZMAT3/IFT22/SNX18/BECN1/USP9X/ADRA2A/IPO7/ATP2C1/UBE2J1/RPGR/VPS41/STX7/SNX7/STXBP5/STX18/CBLB/EXOC2/RFX3/EPHA5/TANGO6/ING1/RAB11FIP…	125
GO:0006403	RNA localization	18/967	26/1831	0.0666105	0.999326	0.999326	FMR1/MX2/G3BP2/STAU2/LRPPRC/NPM1/BICD2/KHDRBS1/PNPT1/POLDIP3/SHQ1/YTHDC1/RBFOX1/NCBP1/NCBP2/AHCTF1/AGFG1/THOC3	18
GO:0045860	positive regulation of protein kinase activity	18/967	26/1831	0.0666105	0.999326	0.999326	RPTOR/TLR4/PTPN1/NEK10/ACE/ADRA2A/MAP3K7/SIRT1/CACUL1/HMGA2/STRADB/SLC11A1/ANGPT1/MARK2/CASS4/BORA/ATP2B4/GPRC5B	18
GO:0033138	positive regulation of peptidyl-serine phosphorylation	10/967	13/1831	0.0686462	0.999326	0.999326	BDNF/RPTOR/BRAF/BCL2/IP6K2/PRKD1/HDAC6/AKAP9/ANGPT1/ATP2B4	10
GO:0051346	negative regulation of hydrolase activity	10/967	13/1831	0.0686462	0.999326	0.999326	SERPINB8/HGF/SH3BP4/SH3RF1/CAAP1/CARD8/CAST/RGS2/ARFGEF1/IKBKB	10
GO:0009314	response to radiation	32/967	50/1831	0.0709528	0.999326	0.999326	SLC24A1/HRH1/TP53BP1/ABCA7/METTL3/KMT2A/PTPRK/NPM1/INTS7/BRAF/BCL2/TOPBP1/BHLHE40/CUL4B/MAPK10/SLC24A4/SLC1A2/SOD2/FOXB1/THBD/SIRT1/TANK/CABP4/RRH/REV1/TAFA2/NHEJ1/MECP2/NETO1/IKBIP/NET1/MSH6	32
GO:0010959	regulation of metal ion transport	29/967	45/1831	0.0753606	0.999326	0.999326	FMR1/HTT/VIP/WWP2/PSEN2/KCNAB2/ATP1B2/BCL2/ACTN2/JPH2/THY1/NKAIN3/ACE/ADRA2A/GPD1L/WNK2/PRKD1/CABP4/STIM1/HFE/CAMK2B/AKAP9/NETO1/ISCU/UBR3/APLNR/ATP2B4/STIMATE/SPG11	29
GO:0006352	DNA-templated transcription initiation	13/967	18/1831	0.0761198	0.999326	0.999326	ZNF451/UBTF/HEY2/CAND1/THRA/SETX/MITF/TAF3/PPARGC1A/BDP1/GTF2A1/MED17/SNAPC5	13
GO:0033135	regulation of peptidyl-serine phosphorylation	13/967	18/1831	0.0761198	0.999326	0.999326	BDNF/HGF/RPTOR/RICTOR/BRAF/BCL2/IP6K2/GPD1L/PRKD1/HDAC6/AKAP9/ANGPT1/ATP2B4	13
GO:0090101	negative regulation of transmembrane receptor protein serine/threonine kinase signaling pathway	13/967	18/1831	0.0761198	0.999326	0.999326	IGSF1/ZNF451/SNX25/SPRED1/ING1/SIRT1/FZD1/SIN3A/SNX6/SINHCAF/RBBP7/PPM1A/SMURF2	13
GO:0007156	homophilic cell adhesion via plasma membrane adhesion molecules	8/967	10/1831	0.0768474	0.999326	0.999326	NECTIN3/NECTIN2/NEXN/FAT4/IGSF11/FAT3/NECTIN1/CADM2	8
GO:0039531	regulation of viral-induced cytoplasmic pattern recognition receptor signaling pathway	8/967	10/1831	0.0768474	0.999326	0.999326	SEC14L1/TLR4/EIF2AK2/USP50/ERBIN/MAVS/PRKD1/CARD8	8
GO:0047496	vesicle transport along microtubule	8/967	10/1831	0.0768474	0.999326	0.999326	HTT/TRAK2/AP3B2/KIF3A/BICDL1/FBXW11/AP3M2/MECP2	8
GO:0110020	regulation of actomyosin structure organization	8/967	10/1831	0.0768474	0.999326	0.999326	ARHGAP6/BRAF/ALMS1/RHPN2/PRKD1/RAPGEF3/GPR65/ANKRD23	8
GO:1901989	positive regulation of cell cycle phase transition	8/967	10/1831	0.0768474	0.999326	0.999326	KLHL18/RPTOR/NPM1/FGF10/CUL4B/STXBP4/SIN3A/MECP2	8
GO:1902117	positive regulation of organelle assembly	8/967	10/1831	0.0768474	0.999326	0.999326	HTT/G3BP2/CAPRIN1/GPSM2/SNX18/BECN1/SNX7/STX18	8
GO:2000241	regulation of reproductive process	8/967	10/1831	0.0768474	0.999326	0.999326	VIP/SHB/METTL3/WDR77/FGF9/SULF1/ANAPC4/SMURF2	8
GO:0005996	monosaccharide metabolic process	19/967	28/1831	0.0772247	0.999326	0.999326	HK1/SORBS1/GALK2/DYRK2/CPT1A/HECTD4/B3GLCT/MAN2A2/FUT2/POFUT1/TFAP2B/SIRT1/FUT5/SLC25A13/PPARGC1A/GLYCTK/MLYCD/UST/FUT10	19
GO:0051338	regulation of transferase activity	41/967	66/1831	0.0776177	0.999326	0.999326	WWTR1/HTT/RAD50/ERRFI1/RPTOR/RAP2C/NPM1/TLR4/ADARB1/SPRED1/PTPN1/THY1/FEM1B/PINX1/NEK10/ACE/ADRA2A/IPO7/USP44/RBL1/CBLB/PTPRQ/PRKD1/MAP3K7/SIRT1/CACUL1/GPRC5A/HMGA2/STRADB/SNX6/WDR91/SLC11A1/ANGPT1/RGS2/MARK2/ARRDC4/MUSK/CASS4/BORA/ATP2B4/GPRC5B	41
GO:0043549	regulation of kinase activity	37/967	59/1831	0.0778	0.999326	0.999326	WWTR1/HTT/RAD50/ERRFI1/RPTOR/RAP2C/NPM1/TLR4/ADARB1/SPRED1/PTPN1/THY1/NEK10/ACE/ADRA2A/IPO7/RBL1/CBLB/PTPRQ/PRKD1/MAP3K7/SIRT1/CACUL1/GPRC5A/HMGA2/STRADB/SNX6/WDR91/SLC11A1/ANGPT1/RGS2/MARK2/MUSK/CASS4/BORA/ATP2B4/GPRC5B	37
GO:0051650	establishment of vesicle localization	16/967	23/1831	0.0780571	0.999326	0.999326	HTT/EXOC7/TRAK2/AP3B2/KIF3A/BICDL1/EXOC2/FBXW11/SHROOM2/TANC2/PPFIA2/AP3M2/SYT11/MECP2/LIN7A/SPG11	16
GO:0006796	phosphate-containing compound metabolic process	146/967	256/1831	0.0820353	0.999326	0.999326	WWTR1/TTBK2/AGPAT5/BDNF/FMR1/HTT/RNGTT/CAMTA1/NT5E/HK1/RAD50/ERRFI1/GALK2/HRH1/HGF/ACSL3/DYRK2/RPTOR/KCNAB2/RAP2C/RICTOR/ACP3/PTPRK/GNA12/NPM1/STK16/MAP2K6/TLR4/HMGCS1/BRAF/BCL2/SYK/ADARB1/TTC7A/INPP4B/IP6K2/TOLLIP/SPRED1/ATP6V1B2/IDO1/PTPN1/MAST4/FGF10/GRK3/IRAK4/THY1/PTPRE/PTPDC1/SLC25A16/KALRN/BECN1/NEK10/EIF2AK2/FIG4/DPYD/ACE/ADRA2A/IPO7/SMPDL3B/GPD1L/MAPK10/RBL1/PLD1/CBLB/MTMR1/NAXD/PSKH1/EP…	146
GO:0042327	positive regulation of phosphorylation	42/967	68/1831	0.0827742	0.999326	0.999326	BDNF/FMR1/RAD50/HGF/RPTOR/RAP2C/RICTOR/MAP2K6/TLR4/BRAF/BCL2/SYK/IP6K2/PTPN1/FGF10/NEK10/ACE/ADRA2A/MAVS/PRKD1/MAP3K7/SIRT1/FZD1/SLCO3A1/CACUL1/TNFSF18/HDAC6/HMGA2/STRADB/WDFY2/NIBAN1/FGF9/SLC11A1/AKAP9/ANGPT1/MARK2/MUSK/APLNR/CASS4/BORA/ATP2B4/GPRC5B	42
GO:0051093	negative regulation of developmental process	56/967	93/1831	0.0863416	0.999326	0.999326	WWTR1/INSIG1/SRA1/BDNF/SHB/SEMA5A/TLR4/VASH1/BCL2/ARPIN/EXTL3/NBR1/SPRED1/HEY2/FGF10/HOXB8/STAT1/THY1/WWC1/WDR77/ASXL1/IPO7/AGO1/EPN2/ING1/SOD2/PTHLH/JARID2/RAPGEF3/SIRT1/SIN3A/HUWE1/TNFSF18/CDKL3/HDAC6/ADGRB3/ZFPM1/GRIN3A/MBNL3/DIXDC1/FGF9/RC3H2/SINHCAF/PTGR3/FSTL4/SOCS2/TMEM215/RBBP7/SULF1/FAT3/NEPRO/MECP2/RGS2/FRZB/STAT5B/ATP2B4	56
GO:0050877	nervous system process	71/967	120/1831	0.0885528	0.999326	0.999326	CTSC/BDNF/FMR1/HTT/VIP/SLC24A1/CAMTA1/TBC1D24/HRH1/VTI1A/ABCA7/RAX/KMT2A/ACP3/AFF2/YTHDF1/BRAF/SLC6A1/GJC1/ADARB1/GLRB/KCNQ3/GPR179/IRX5/THRA/HOXB8/GABRA2/FIG4/WDR1/ADRA2A/RPGR/WHRN/SLC24A4/DLGAP2/RIPOR2/TMEM108/SOD2/GABRR2/FOXB1/PRKD1/POU6F2/KCNA1/RAPGEF3/JHY/TIFAB/CABP4/ITGA3/ADGRB3/SYNM/RRH/GRIN3A/CAMK4/TAFA2/DRGX/ALDH1A3/ATXN7/IGSF11/RBFOX1/SLC45A2/SYT11/RETREG1/MECP2/NETO1/UBR3/MUSK/DNAAF11/…	71
GO:0006575	cellular modified amino acid metabolic process	11/967	15/1831	0.0887572	0.999326	0.999326	ALDH4A1/CPT1A/FTCD/FPGS/TMLHE/DHFR2/SLC19A1/BHMT2/ABHD12B/DUOXA1/SLC25A32	11
GO:0007043	cell-cell junction assembly	11/967	15/1831	0.0887572	0.999326	0.999326	TBCD/GJC1/MPP7/WDR1/ACE/MPDZ/EPB41L3/PKP4/STRN/APLNR/IKBKB	11
GO:0010469	regulation of signaling receptor activity	11/967	15/1831	0.0887572	0.999326	0.999326	ERRFI1/ADRA2A/CBLB/SLC24A4/DLGAP2/GPRC5A/HDAC6/HFE/SNX6/ANKRD13C/NETO1	11
GO:0042742	defense response to bacterium	11/967	15/1831	0.0887572	0.999326	0.999326	TLR4/SYK/IGHG3/MAVS/PRKD1/MAP3K7/ARG2/JCHAIN/H2BC6/SLC11A1/SYT11	11
GO:0051261	protein depolymerization	11/967	15/1831	0.0887572	0.999326	0.999326	TTBK2/MID1/SEMA5A/SPAST/EPS8/ACTN2/WDR1/HDAC6/TRIM54/LMOD1/ATXN7	11
GO:1901879	regulation of protein depolymerization	11/967	15/1831	0.0887572	0.999326	0.999326	TTBK2/MID1/SEMA5A/SPAST/EPS8/ACTN2/WDR1/HDAC6/TRIM54/LMOD1/ATXN7	11
GO:0016049	cell growth	31/967	49/1831	0.0893976	0.999326	0.999326	BDNF/RPTOR/SEMA5A/RICTOR/NPM1/BCL2/ING5/FOXL2/SH3BP4/TIAM1/IP6K2/EXTL3/USP9X/ING1/TMEM108/ST8SIA2/SIN3A/CDKL3/HDAC6/FSTL4/SOCS2/NCBP1/RBBP7/MECP2/RGS2/FRZB/ZFYVE27/IST1/SORBS2/NET1/SPG11	31
GO:0046907	intracellular transport	126/967	220/1831	0.0898139	0.999326	0.999326	INSIG1/SYS1/MFF/LMAN2/FMR1/HTT/VIPAS39/MX2/THEM4/VTI1A/STAU2/ERLEC1/TTC21B/SYNRG/LRPPRC/TOMM22/TRAK2/NPM1/YWHAQ/TMEM167A/BICD2/AFTPH/SPAST/YOD1/AP3B2/VPS36/CPT1A/BCL2/SYK/VAMP4/KCNQ3/EPS15L1/KHDRBS1/SNX1/ACTN2/SPIRE1/WDR35/KIF3A/PTPN1/ALMS1/TCAF1/ZDHHC2/HGSNAT/ZDHHC11/IFT22/SNX18/WWC1/SLC25A16/BICDL1/BECN1/USP9X/IPO7/KIF16B/UBE2J1/RPGR/VPS41/STX7/SNX7/SPG7/STX18/CBLB/ING1/RAB11FIP3/NDFIP2/FBXW11/…	126
GO:0045926	negative regulation of growth	17/967	25/1831	0.0907593	0.999326	0.999326	SEMA5A/BCL2/ING5/SH3BP4/IP6K2/WWC1/ING1/JARID2/PNPT1/CDKL3/HDAC6/FSTL4/SOCS2/RBBP7/MECP2/RGS2/FRZB	17
GO:0045087	innate immune response	48/967	79/1831	0.0911373	0.999326	0.999326	MX2/IRF4/G3BP2/IFNAR2/HK1/APOBEC3D/APOBEC3F/METTL3/SEC14L1/MAP2K6/TLR4/SYK/ADARB1/TOLLIP/SPIRE1/NECTIN2/PTPN1/STAT1/IRAK4/ZDHHC11/C4B/SLC22A5/CD209/EIF2AK2/IPO7/SMPDL3B/USP50/USP44/IFNGR1/NCR3/ERBIN/MAVS/PRKD1/STXBP4/MAP3K7/TANK/SIN3A/ARG2/ANKHD1/JCHAIN/MCOLN2/CARD8/H2BC6/SLC11A1/TRIM13/STAT5B/GFI1/IKBKB	48
GO:0003008	system process	127/967	222/1831	0.0919987	0.999326	0.999326	WWTR1/CTSC/BDNF/FMR1/HTT/VIP/SLC24A1/CAMTA1/TBC1D24/CCBE1/HRH1/VTI1A/SLC38A3/ABCA7/RAX/KMT2A/ACP3/AFF2/GNA12/YTHDF1/MAP2K6/TPM4/TLR4/ATP1B2/BRAF/PTGS1/SLC6A1/GJC1/BCL2/FOXL2/ABCC4/ADARB1/TIAM1/GLRB/ADORA3/KCNQ3/HEY2/GPR179/IRX5/FGF10/THRA/ABCC9/HOXB8/STAT1/SLC16A7/GABRA2/BECN1/SLC22A5/NEK10/FIG4/WDR1/ACE/ADRA2A/GPD1L/RHPN2/RPGR/WHRN/SLC19A1/ZEB2/SLC24A4/DLGAP2/RAB11FIP3/SLC6A6/SLC1A2/RIPOR2/TMEM1…	127
GO:1901566	organonitrogen compound biosynthetic process	104/967	180/1831	0.0921023	0.999326	0.999326	MRPL44/SIRT3/FMR1/YARS1/GATB/NT5E/CAPRIN1/WTIP/EIF4E3/SLC25A37/ACSL3/ABCA7/LRPPRC/METTL3/NPM1/MRPL23/YTHDF1/MGAT2/NFE2L1/EEF1E1/BZW2/UGGT1/BCL2/SYK/FPGS/ST3GAL3/LTO1/EXTL3/KHDRBS1/IDO1/ZDHHC2/ZDHHC11/TPH1/FTSJ1/MRPL2/SLC25A16/B3GLCT/EIF2AK2/DPYD/BACE1-AS/AGO1/UBE2J1/TMLHE/DHFR2/PTCD3/FUT2/PLD1/BHMT2/TMEM14B/UGGT2/NAXD/IDO2/SLC1A2/GCNT1/POFUT1/POMT1/UHMK1/PRKD1/ASAH1/MRPS35/ST8SIA2/MTG2/FUT5/ZDHHC…	104
GO:0006357	regulation of transcription by RNA polymerase II	184/967	327/1831	0.0932376	0.999326	0.999326	WWTR1/MXD4/ZNF195/IRF4/CAMTA1/PTOV1/ZNF19/RNF2/WWP2/ZNF451/ZNF264/TCF4/SP3/SLC38A3/TTC21B/HGF/TP53BP1/PKNOX1/ZNF526/ZNF391/RAX/E2F5/KMT2A/NPM1/ZNF286A/ZNF236/GMEB2/STK16/ZNF362/NFE2L1/TLR4/ZNF493/ZNF793/SOS1/ZNF546/HOXD3/ZNF383/CBX6/FOXL2/ARID1B/ZNF516/BHLHE40/ZNF41/ZNF208/STOX2/KHDRBS1/HEY2/KDM6B/KDM4C/CAND1/JPH2/KLF8/ZNF432/FOXO3B/WWOX/ELK4/ZNF436/IRX5/FGF10/SP140/THRA/HOXB8/ZNF101/STAT1/BRD1/M…	184
GO:0006793	phosphorus metabolic process	149/967	263/1831	0.0998301	0.999326	0.999326	WWTR1/TTBK2/AGPAT5/BDNF/FMR1/HTT/RNGTT/CAMTA1/NT5E/HK1/RAD50/ERRFI1/GALK2/HRH1/HGF/ACSL3/DYRK2/RPTOR/KCNAB2/RAP2C/RICTOR/ACP3/PTPRK/GNA12/NPM1/STK16/MAP2K6/TLR4/HMGCS1/BRAF/UGGT1/BCL2/SYK/ADARB1/TTC7A/INPP4B/IP6K2/TOLLIP/SPRED1/ATP6V1B2/IDO1/PTPN1/MAST4/FGF10/GRK3/IRAK4/THY1/PTPRE/PTPDC1/SLC25A16/KALRN/BECN1/NEK10/EIF2AK2/FIG4/DPYD/ACE/ADRA2A/IPO7/SMPDL3B/GPD1L/MAPK10/RBL1/PLD1/CBLB/MTMR1/UGGT2/N…	149
GO:0050890	cognition	25/967	39/1831	0.102253	0.999326	0.999326	BDNF/HTT/VIP/HRH1/ABCA7/KMT2A/AFF2/YTHDF1/BRAF/SLC6A1/THRA/FOXB1/RAPGEF3/TIFAB/ITGA3/ADGRB3/CAMK4/TAFA2/SYT11/MECP2/NETO1/MUSK/SPECC1/ATXN1/SPG11	25
GO:0019318	hexose metabolic process	18/967	27/1831	0.103328	0.999326	0.999326	HK1/SORBS1/GALK2/DYRK2/CPT1A/HECTD4/B3GLCT/MAN2A2/FUT2/POFUT1/TFAP2B/SIRT1/FUT5/SLC25A13/PPARGC1A/GLYCTK/MLYCD/FUT10	18
GO:0007032	endosome organization	9/967	12/1831	0.103454	0.999326	0.999326	VTI1A/VPS36/VAMP4/TMEM127/USP50/TMCC1/VTA1/RAB22A/IST1	9
GO:0007044	cell-substrate junction assembly	9/967	12/1831	0.103454	0.999326	0.999326	SORBS1/ARHGAP6/PTPRK/BCL2/ACTN2/THY1/FMN1/WHAMM/PTPRA	9
GO:0043367	CD4-positive, alpha-beta T cell differentiation	9/967	12/1831	0.103454	0.999326	0.999326	IRF4/SHB/KMT2A/BRAF/SH3RF1/TNFSF18/ZFPM1/STAT4/RC3H2	9
GO:0045666	positive regulation of neuron differentiation	9/967	12/1831	0.103454	0.999326	0.999326	TCF4/HOXD3/ETV5/HEYL/BEND6/SIN3A/SOCS2/DUOXA1/GPRC5B	9
GO:1901796	regulation of signal transduction by p53 class mediator	9/967	12/1831	0.103454	0.999326	0.999326	DYRK2/NPM1/MAP2K6/EEF1E1/BCL2/SPRED1/SIRT1/TIFAB/URB2	9
GO:0010638	positive regulation of organelle organization	33/967	53/1831	0.103536	0.999326	0.999326	MFF/HTT/G3BP2/CAPRIN1/RAD50/SEMA5A/RICTOR/FCHSD1/SPAST/BRAF/SMC4/GPSM2/ACTN2/SPIRE1/SETDB2/SNX18/BECN1/WDR1/SNX7/STX18/PRKD1/FMN1/RAPGEF3/MIEF1/GPR65/WHAMM/LMOD1/SURF4/DOC2B/PPARGC1A/AKAP9/MECP2/DNM1L	33
GO:0032970	regulation of actin filament-based process	29/967	46/1831	0.10365	0.999326	0.999326	STAU2/ARHGAP6/SEMA5A/RICTOR/FCHSD1/EPS8/BRAF/ARPIN/ACTN2/ALMS1/WDR1/RHPN2/ARPC5L/ZEB2/EPHA5/CAPN10/PRKD1/FMN1/RAPGEF3/GPR65/WHAMM/LMOD1/DIXDC1/ARHGAP40/ATP2A2/AKAP9/ANKRD23/ARFGEF1/MYO3B	29
GO:0060341	regulation of cellular localization	76/967	130/1831	0.105898	0.999326	0.999326	WWTR1/TTBK2/INSIG1/MFF/SIRT3/BDNF/MX2/VIP/SORBS1/WWP2/ERLEC1/TTC21B/ACSL3/ABCA7/KCNAB2/NPM1/SLC9B2/TLR4/YOD1/CPT1A/BCL2/KIAA1614/TIAM1/GPSM2/KHDRBS1/ACTN2/PTPN1/TCAF1/ZDHHC2/WWC1/PINX1/ADRA2A/IPO7/ATP2C1/UBE2J1/GPD1L/STX7/STXBP5/STX18/RFX3/EPHA5/RAB11FIP3/NDFIP2/RIPOR2/CAPN10/TFAP2B/MAVS/UHMK1/PRKD1/STXBP4/MEAK7/RAB11FIP1/RAPGEF3/SIN3A/HUWE1/MIEF1/SUMO3/TM7SF3/ITGA3/HDAC6/ZFAND1/HFE/ITGB2/DOC2B/M…	76
GO:0030308	negative regulation of cell growth	12/967	17/1831	0.108216	0.999326	0.999326	SEMA5A/BCL2/SH3BP4/IP6K2/ING1/CDKL3/HDAC6/FSTL4/RBBP7/MECP2/RGS2/FRZB	12
GO:0035967	cellular response to topologically incorrect protein	12/967	17/1831	0.108216	0.999326	0.999326	ERLEC1/ABCA7/YOD1/UGGT1/DNAJB14/PTPN1/EIF2AK2/DNAJB12/UGGT2/DNAJC10/TM7SF3/HDAC6	12
GO:0051028	mRNA transport	12/967	17/1831	0.108216	0.999326	0.999326	FMR1/MX2/G3BP2/LRPPRC/BICD2/POLDIP3/YTHDC1/NCBP1/NCBP2/AHCTF1/AGFG1/THOC3	12
GO:0098659	inorganic cation import across plasma membrane	12/967	17/1831	0.108216	0.999326	0.999326	SLC24A1/SLC9A7/ATP1B2/SLC6A1/ABCC9/ATP4B/SLC24A4/KCNJ13/SLC5A2/ISCU/ATP2B4/KCNJ5	12
GO:0099587	inorganic ion import across plasma membrane	12/967	17/1831	0.108216	0.999326	0.999326	SLC24A1/SLC9A7/ATP1B2/SLC6A1/ABCC9/ATP4B/SLC24A4/KCNJ13/SLC5A2/ISCU/ATP2B4/KCNJ5	12
GO:0034599	cellular response to oxidative stress	22/967	34/1831	0.108991	0.999326	0.999326	TBC1D24/STAU2/HGF/PTPRK/VKORC1L1/KDM6B/ETV5/BECN1/GPX8/SOD2/PRKD1/TOP2B/MEAK7/SIRT1/SETX/SIN3A/PNPT1/HDAC6/PPARGC1A/ATP2A2/NET1/STX2	22
GO:0010562	positive regulation of phosphorus metabolic process	47/967	78/1831	0.109044	0.999326	0.999326	BDNF/FMR1/CAMTA1/RAD50/HRH1/HGF/ACSL3/RPTOR/RAP2C/RICTOR/GNA12/MAP2K6/TLR4/BRAF/BCL2/SYK/IP6K2/PTPN1/FGF10/NEK10/ACE/ADRA2A/MAVS/PRKD1/MAP3K7/SIRT1/FZD1/SLCO3A1/CACUL1/TNFSF18/HDAC6/HMGA2/STRADB/WDFY2/NIBAN1/FGF9/SLC11A1/PPARGC1A/AKAP9/ANGPT1/MARK2/MUSK/APLNR/CASS4/BORA/ATP2B4/GPRC5B	47
GO:0045937	positive regulation of phosphate metabolic process	47/967	78/1831	0.109044	0.999326	0.999326	BDNF/FMR1/CAMTA1/RAD50/HRH1/HGF/ACSL3/RPTOR/RAP2C/RICTOR/GNA12/MAP2K6/TLR4/BRAF/BCL2/SYK/IP6K2/PTPN1/FGF10/NEK10/ACE/ADRA2A/MAVS/PRKD1/MAP3K7/SIRT1/FZD1/SLCO3A1/CACUL1/TNFSF18/HDAC6/HMGA2/STRADB/WDFY2/NIBAN1/FGF9/SLC11A1/PPARGC1A/AKAP9/ANGPT1/MARK2/MUSK/APLNR/CASS4/BORA/ATP2B4/GPRC5B	47
GO:0090287	regulation of cellular response to growth factor stimulus	26/967	41/1831	0.111302	0.999326	0.999326	CCBE1/ZNF451/SNX25/SPRED1/PTPN1/FGF10/ZEB2/EPN2/ING1/TMEM108/TFAP2B/SIRT1/ZDHHC17/FZD1/SIN3A/ITGA3/SNX6/FGF9/SINHCAF/FSTL4/RBBP7/SULF1/FGFBP3/ATP2B4/PPM1A/SMURF2	26
GO:0110053	regulation of actin filament organization	19/967	29/1831	0.115695	0.999326	0.999326	ARHGAP6/SEMA5A/RICTOR/FCHSD1/EPS8/BRAF/ARPIN/ACTN2/ALMS1/WDR1/RHPN2/ARPC5L/FMN1/RAPGEF3/GPR65/WHAMM/LMOD1/ARHGAP40/ARFGEF1	19
GO:0001932	regulation of protein phosphorylation	58/967	98/1831	0.115895	0.999326	0.999326	WWTR1/BDNF/FMR1/HTT/RAD50/ERRFI1/HGF/RPTOR/RAP2C/RICTOR/NPM1/MAP2K6/TLR4/BRAF/BCL2/SYK/ADARB1/IP6K2/SPRED1/PTPN1/FGF10/THY1/NEK10/ACE/ADRA2A/IPO7/GPD1L/CBLB/PTPRQ/MAVS/PRKD1/MAP3K7/SIRT1/FZD1/SLCO3A1/CACUL1/TNFSF18/GPRC5A/DNAJC10/HDAC6/HMGA2/STRADB/WDFY2/NIBAN1/ITGB2/SNX6/FGF9/SLC11A1/AKAP9/ANGPT1/RGS2/MARK2/MUSK/APLNR/CASS4/BORA/ATP2B4/GPRC5B	58
GO:0006468	protein phosphorylation	79/967	136/1831	0.116532	0.999326	0.999326	WWTR1/TTBK2/BDNF/FMR1/HTT/RAD50/ERRFI1/HGF/DYRK2/RPTOR/RAP2C/RICTOR/NPM1/STK16/MAP2K6/TLR4/BRAF/BCL2/SYK/ADARB1/IP6K2/SPRED1/PTPN1/MAST4/FGF10/GRK3/THY1/KALRN/NEK10/EIF2AK2/ACE/ADRA2A/IPO7/GPD1L/MAPK10/CBLB/EPHA5/WNK2/PTPRQ/MAVS/UHMK1/VRK3/PRKD1/MAP3K7/SIRT1/FZD1/SLCO3A1/CACUL1/TNFSF18/GPRC5A/CDKL3/DNAJC10/HDAC6/HMGA2/STRADB/WDFY2/STK10/NIBAN1/CAMK4/HTATIP2/ITGB2/SNX6/FGF9/PRKY/SLC11A1/CAMK2B/AKA…	79
GO:0048193	Golgi vesicle transport	23/967	36/1831	0.119387	0.999326	0.999326	INSIG1/SYS1/LMAN2/HTT/VTI1A/ACSL3/RAB33B/BICD2/SPAST/SNX1/SPIRE1/KIF16B/ATP2C1/STX18/EXOC2/SORCS1/ATP9B/ARFRP1/PRKD1/WHAMM/SLC10A7/CCDC93/AP4M1	23
GO:1904062	regulation of monoatomic cation transmembrane transport	23/967	36/1831	0.119387	0.999326	0.999326	FMR1/HTT/WWP2/PSEN2/KCNAB2/ATP1B2/BCL2/ACTN2/JPH2/THY1/ADRA2A/GPD1L/WNK2/PRKD1/CABP4/STIM1/AKAP9/NETO1/ISCU/UBR3/APLNR/ATP2B4/STIMATE	23
GO:0051090	regulation of DNA-binding transcription factor activity	27/967	43/1831	0.12028	0.999326	0.999326	G3BP2/RNF2/WWP2/TP53BP1/NPM1/TLR4/SYK/ADORA3/BHLHE40/EIF2AK2/TRIM52/HEYL/EPHA5/ERBIN/MAVS/PRKD1/SIRT1/FZD1/SLCO3A1/TNFSF18/TAF3/CARD8/TRIM13/PPARGC1A/ABRA/GFI1/IKBKB	27
GO:0051348	negative regulation of transferase activity	16/967	24/1831	0.121944	0.999326	0.999326	WWTR1/ERRFI1/NPM1/ADARB1/SPRED1/PTPN1/THY1/PINX1/IPO7/USP44/CBLB/PTPRQ/SIRT1/GPRC5A/SNX6/RGS2	16
GO:0051648	vesicle localization	16/967	24/1831	0.121944	0.999326	0.999326	HTT/EXOC7/TRAK2/AP3B2/KIF3A/BICDL1/EXOC2/FBXW11/SHROOM2/TANC2/PPFIA2/AP3M2/SYT11/MECP2/LIN7A/SPG11	16
GO:0070507	regulation of microtubule cytoskeleton organization	16/967	24/1831	0.121944	0.999326	0.999326	TTBK2/MID1/BICD2/SPAST/TBCD/GPSM2/TRIM36/MPDZ/HDAC6/TRIM54/DIXDC1/ATXN7/AKAP9/MECP2/MARK2/BORA	16
GO:0001936	regulation of endothelial cell proliferation	13/967	19/1831	0.12684	0.999326	0.999326	VIP/RPTOR/SEMA5A/RICTOR/VASH1/FGF10/STAT1/FUT2/PRKD1/SIRT1/SULF1/STAT5A/APLNR	13
GO:0007188	adenylate cyclase-modulating G protein-coupled receptor signaling pathway	13/967	19/1831	0.12684	0.999326	0.999326	VIP/GNA12/ADRA2A/PTHLH/PSAPL1/ADGRG5/GNAL/GPR65/PTGFR/ADGRB3/GNAZ/RGS2/ATP2B4	13
GO:0007292	female gamete generation	13/967	19/1831	0.12684	0.999326	0.999326	SHB/METTL3/SOS1/BCL2/FOXL2/SPIRE1/ETV6/USP9X/WDR77/MARF1/SIRT1/HSF2BP/YTHDC1	13
GO:0008088	axo-dendritic transport	13/967	19/1831	0.12684	0.999326	0.999326	STAU2/TRAK2/SPAST/AP3B2/KIF3A/SPG7/FBXW11/TMEM108/HDAC6/AP3M2/MECP2/NETO1/SPG11	13
GO:0009566	fertilization	13/967	19/1831	0.12684	0.999326	0.999326	NECTIN3/FOXL2/GLRB/CCDC136/NECTIN2/UBE3A/SYT6/WDR48/TRIM36/WBP2NL/AKAP3/FUT10/STX2	13
GO:0019827	stem cell population maintenance	13/967	19/1831	0.12684	0.999326	0.999326	METTL3/WDR43/BRAF/KDM4C/FGF10/MCPH1/ING1/SIN3A/HMGA2/SINHCAF/RBBP7/MED17/FUT10	13
GO:0030856	regulation of epithelial cell differentiation	13/967	19/1831	0.12684	0.999326	0.999326	WWTR1/ERRFI1/RPTOR/EXTL3/SPRED1/HEY2/FGF10/STAT1/IPO7/RFX3/FRZB/STAT5B/IKBKB	13
GO:0045216	cell-cell junction organization	13/967	19/1831	0.12684	0.999326	0.999326	TBCD/GJC1/MPP7/WDR1/ACE/WHRN/MPDZ/EPB41L3/PKP4/STRN/NECTIN1/APLNR/IKBKB	13
GO:0071900	regulation of protein serine/threonine kinase activity	13/967	19/1831	0.12684	0.999326	0.999326	HTT/RPTOR/TLR4/PTPN1/THY1/NEK10/ADRA2A/IPO7/MAP3K7/SIRT1/HMGA2/RGS2/ATP2B4	13
GO:0098727	maintenance of cell number	13/967	19/1831	0.12684	0.999326	0.999326	METTL3/WDR43/BRAF/KDM4C/FGF10/MCPH1/ING1/SIN3A/HMGA2/SINHCAF/RBBP7/MED17/FUT10	13
GO:1903169	regulation of calcium ion transmembrane transport	13/967	19/1831	0.12684	0.999326	0.999326	FMR1/HTT/PSEN2/BCL2/JPH2/THY1/ADRA2A/PRKD1/CABP4/STIM1/UBR3/APLNR/STIMATE	13
GO:0010817	regulation of hormone levels	32/967	52/1831	0.127343	0.999326	0.999326	SIRT3/VIP/SLC9B2/CPT1A/FOXL2/TIAM1/ADH6/ADH1B/ACE/ADRA2A/BCO1/ERO1B/RFX3/EPHA5/RAB11FIP3/CAPN10/TFAP2B/PRKD1/STXBP4/RAB11FIP1/SIN3A/TM7SF3/HFE/SULT1A1/TIPARP/ALDH1A3/DOC2B/GNAZ/DUOXA1/IDE/STAT5B/GFI1	32
GO:0032984	protein-containing complex disassembly	20/967	31/1831	0.127815	0.999326	0.999326	TTBK2/MID1/SEMA5A/SPAST/EPS8/ACTN2/KLC1/BECN1/WDR1/GRWD1/SETX/VTA1/HDAC6/ZFAND1/TRIM54/LMOD1/ATXN7/ATP2A2/SET/IST1	20
GO:0022900	electron transport chain	10/967	14/1831	0.128258	0.999326	0.999326	GLDC/ALDH4A1/POR/IDO1/SOD2/SLC25A13/PPARGC1A/ISCU/ME2/ENOX2	10
GO:0030218	erythrocyte differentiation	10/967	14/1831	0.128258	0.999326	0.999326	SP3/FAM210B/PKNOX1/THRA/STAT1/BRD1/ZFPM1/SLC25A40/SFXN1/STAT5B	10
GO:0043393	regulation of protein binding	10/967	14/1831	0.128258	0.999326	0.999326	TTBK2/BDNF/TIAM1/PSME3IP1/USP9X/ZFPM1/HFE/ATP2A2/IDE/MARK2	10
GO:0099518	vesicle cytoskeletal trafficking	10/967	14/1831	0.128258	0.999326	0.999326	HTT/TRAK2/AP3B2/KIF3A/BICDL1/FBXW11/TANC2/PPFIA2/AP3M2/MECP2	10
GO:0070588	calcium ion transmembrane transport	24/967	38/1831	0.129635	0.999326	0.999326	FMR1/HTT/SLC24A1/PSEN2/BCL2/XCR1/JPH2/THY1/ADRA2A/ATP2C1/NCS1/SLC24A4/PRKD1/TRPM6/CABP4/STIM1/CCR5/GRIN3A/MCOLN2/ATP2A2/UBR3/APLNR/ATP2B4/STIMATE	24
GO:0032880	regulation of protein localization	67/967	115/1831	0.132853	0.999326	0.999326	WWTR1/TTBK2/INSIG1/MFF/SIRT3/BDNF/VIP/SORBS1/WWP2/ERLEC1/ACSL3/ABCA7/KCNAB2/NPM1/SLC9B2/TLR4/YOD1/CPT1A/BCL2/TIAM1/GPSM2/ACTN2/PTPN1/TCAF1/ZDHHC2/PINX1/ADRA2A/IPO7/ATP2C1/UBE2J1/GPD1L/STX7/STXBP5/RFX3/EPHA5/RAB11FIP3/NDFIP2/RIPOR2/CAPN10/TFAP2B/MAVS/UHMK1/PRKD1/STXBP4/MEAK7/RAB11FIP1/RAPGEF3/SIN3A/HUWE1/MIEF1/SUMO3/TM7SF3/ITGA3/HDAC6/ZFAND1/HFE/ITGB2/DOC2B/MESD/GNAZ/SYT11/ANGPT1/VCPIP1/DNM1L/BORA…	67
GO:0048588	developmental cell growth	17/967	26/1831	0.136374	0.999326	0.999326	BDNF/SEMA5A/FOXL2/TIAM1/USP9X/TMEM108/ST8SIA2/SIN3A/CDKL3/HDAC6/FSTL4/MECP2/RGS2/ZFYVE27/IST1/SORBS2/SPG11	17
GO:0006913	nucleocytoplasmic transport	29/967	47/1831	0.137956	0.999326	0.999326	FMR1/MX2/NPM1/SYK/KCNQ3/KHDRBS1/IPO7/CBLB/ING1/MAVS/UHMK1/PRKD1/RAPGEF3/POLDIP3/STRADB/HTATIP2/FGF9/YTHDC1/NCBP1/RANBP1/ANGPT1/ABRA/NCBP2/AHCTF1/ATXN1/PPM1A/SPG11/AGFG1/THOC3	29
GO:0051169	nuclear transport	29/967	47/1831	0.137956	0.999326	0.999326	FMR1/MX2/NPM1/SYK/KCNQ3/KHDRBS1/IPO7/CBLB/ING1/MAVS/UHMK1/PRKD1/RAPGEF3/POLDIP3/STRADB/HTATIP2/FGF9/YTHDC1/NCBP1/RANBP1/ANGPT1/ABRA/NCBP2/AHCTF1/ATXN1/PPM1A/SPG11/AGFG1/THOC3	29
GO:0032886	regulation of microtubule-based process	25/967	40/1831	0.139716	0.999326	0.999326	TTBK2/MID1/TTC21B/NPM1/BICD2/SPAST/TBCD/GPSM2/ALMS1/MCPH1/TRIM36/TMEM67/SIRT1/MPDZ/CCDC65/HDAC6/TRIM54/DIXDC1/MAP10/ATXN7/AKAP9/MECP2/MDM1/MARK2/BORA	25
GO:0098657	import into cell	69/967	119/1831	0.141445	0.999326	0.999326	LMAN2/FMR1/VIPAS39/SLC24A1/TBC1D24/RIN3/SLC9A7/SLC38A3/ACSL3/ABCA7/SYNRG/SLC9B2/TLR4/ATP1B2/AP3B2/SLC6A1/SYK/SH3BP4/VAMP4/CANX/FCHO2/EPS15L1/SNX1/GULP1/PTPN1/ABCC9/GRK3/SNX18/C4B/BECN1/CD209/GPR107/UBE3A/ATP4B/SLC19A1/EPN2/SLC24A4/ATP9B/ARFGAP1/SLC6A6/LMBRD1/SLC1A2/TMEM108/PRKD1/KCNJ13/LRP12/SLC5A2/SLC6A13/ACKR2/SLC29A4/HFE/SURF4/ARHGAP27/ITGB2/MESD/AP3M2/SLC11A1/AMPH/RAB4A/SYT11/ANGPT1/NECAP2/RG…	69
GO:0001935	endothelial cell proliferation	14/967	21/1831	0.144569	0.999326	0.999326	VIP/RPTOR/SEMA5A/RICTOR/VASH1/FGF10/STAT1/ZEB2/FUT2/PRKD1/SIRT1/SULF1/STAT5A/APLNR	14
GO:0006469	negative regulation of protein kinase activity	14/967	21/1831	0.144569	0.999326	0.999326	WWTR1/ERRFI1/NPM1/ADARB1/SPRED1/PTPN1/THY1/IPO7/CBLB/PTPRQ/SIRT1/GPRC5A/SNX6/RGS2	14
GO:0010232	vascular transport	14/967	21/1831	0.144569	0.999326	0.999326	SLC38A3/ATP1B2/SLC6A1/ABCC4/ABCC9/SLC16A7/SLC22A5/SLC19A1/SLC6A6/SLC1A2/SLCO3A1/SLC6A13/SLC29A4/ATP2B4	14
GO:0048592	eye morphogenesis	14/967	21/1831	0.144569	0.999326	0.999326	NECTIN3/STAU2/SP3/BCL2/FOXL2/THY1/TFAP2B/SHROOM2/CABP4/DZANK1/ALDH1A3/TMEM215/FAT3/NECTIN1	14
GO:0150104	transport across blood-brain barrier	14/967	21/1831	0.144569	0.999326	0.999326	SLC38A3/ATP1B2/SLC6A1/ABCC4/ABCC9/SLC16A7/SLC22A5/SLC19A1/SLC6A6/SLC1A2/SLCO3A1/SLC6A13/SLC29A4/ATP2B4	14
GO:0006812	monoatomic cation transport	70/967	121/1831	0.145742	0.999326	0.999326	FMR1/HTT/VIP/SLC24A1/WWP2/SLC9A7/SLC25A37/SLC38A3/PSEN2/KCNAB2/SLC9B2/ATP1B2/SLC6A1/BCL2/KCNQ3/ACTN2/XCR1/JPH2/ATP6V1B2/ABCC9/THY1/NKAIN3/SLC22A5/ACE/ADRA2A/ATP2C1/GPD1L/ATP4B/NCS1/SLC24A4/WNK2/SLC6A6/NDFIP2/PRKD1/SHROOM2/KCNA1/KCNJ13/SLC5A2/SLC6A13/TRPM6/CABP4/STIM1/SLC29A4/CCR5/SLC10A7/SLC4A7/HFE/GRIN3A/KCNQ5/MCOLN2/SLC25A13/SLC11A1/ATP2A2/KCNN3/KCNT2/CAMK2B/AKAP9/NETO1/ISCU/UBR3/SFXN1/SLC20A1/…	70
GO:0040013	negative regulation of locomotion	30/967	49/1831	0.146631	0.999326	0.999326	RIN3/RAP2C/SEMA5A/PTPRK/GNA12/ATP1B2/VASH1/BRAF/BCL2/ADARB1/ARPIN/ADORA3/SPRED1/TCAF1/THY1/ZEB2/FRMD5/ING1/RIPOR2/SIN3A/HDAC6/MITF/GCSAM/SINHCAF/RBBP7/SULF1/STARD13/SRGAP2/MECP2/ATP2B4	30
GO:0006366	transcription by RNA polymerase II	192/967	346/1831	0.147184	0.999326	0.999326	WWTR1/MXD4/ZNF195/IRF4/CAMTA1/PTOV1/ZNF19/RNF2/WWP2/ZNF451/ZNF264/TCF4/SP3/SLC38A3/TTC21B/HGF/TP53BP1/PKNOX1/ZNF526/ZNF391/RAX/E2F5/KMT2A/NPM1/WDR43/ZNF286A/ZNF236/GMEB2/STK16/ZNF362/NFE2L1/TLR4/ZNF493/ZNF793/INTS7/SOS1/ZNF546/HOXD3/ZNF383/CBX6/FOXL2/ARID1B/ZNF516/TCEA3/BHLHE40/ZNF41/ZNF208/STOX2/KHDRBS1/HEY2/KDM6B/KDM4C/CAND1/JPH2/KLF8/ZNF432/FOXO3B/WWOX/ELK4/ZNF436/IRX5/FGF10/SP140/THRA/HOXB8/Z…	192
GO:0007178	transmembrane receptor protein serine/threonine kinase signaling pathway	26/967	42/1831	0.149619	0.999326	0.999326	WWTR1/IGSF1/ZNF451/PTPRK/SNX25/SPRED1/FGF10/USP9X/ZEB2/ING1/TFAP2B/MAP3K7/SIRT1/FZD1/SIN3A/ITGA3/HFE/SNX6/FGF9/SINHCAF/FSTL4/RBBP7/SULF1/AKAP3/PPM1A/SMURF2	26
GO:0015833	peptide transport	18/967	28/1831	0.150314	0.999326	0.999326	SIRT3/VIP/SLC9B2/CPT1A/TIAM1/CD209/ADRA2A/RFX3/EPHA5/CAPN10/TFAP2B/PRKD1/STXBP4/TM7SF3/HFE/DOC2B/ABCB9/GNAZ	18
GO:0046883	regulation of hormone secretion	18/967	28/1831	0.150314	0.999326	0.999326	SIRT3/SLC9B2/CPT1A/FOXL2/TIAM1/ADRA2A/RFX3/EPHA5/RAB11FIP3/CAPN10/TFAP2B/PRKD1/STXBP4/RAB11FIP1/TM7SF3/HFE/DOC2B/GNAZ	18
GO:0051962	positive regulation of nervous system development	18/967	28/1831	0.150314	0.999326	0.999326	BDNF/CAPRIN1/TBC1D24/STAU2/SEMA5A/BRAF/TIAM1/ETV5/ACE/ST8SIA2/CDKL3/HDAC6/ADGRB3/CAMK2B/MECP2/ZFYVE27/IST1/SS18L1	18
GO:0001678	intracellular glucose homeostasis	11/967	16/1831	0.151205	0.999326	0.999326	HK1/ZNF236/SLC9B2/TIAM1/ACE/ADRA2A/EPHA5/STXBP4/SIRT1/SIN3A/PPARGC1A	11
GO:0030512	negative regulation of transforming growth factor beta receptor signaling pathway	11/967	16/1831	0.151205	0.999326	0.999326	ZNF451/SNX25/SPRED1/ING1/SIRT1/SIN3A/SNX6/SINHCAF/RBBP7/PPM1A/SMURF2	11
GO:0035710	CD4-positive, alpha-beta T cell activation	11/967	16/1831	0.151205	0.999326	0.999326	IRF4/SHB/KMT2A/BRAF/CBLB/SH3RF1/TNFSF18/ARG2/ZFPM1/STAT4/RC3H2	11
GO:0050731	positive regulation of peptidyl-tyrosine phosphorylation	11/967	16/1831	0.151205	0.999326	0.999326	HGF/RICTOR/SYK/PTPN1/FGF10/ACE/ADRA2A/TNFSF18/ANGPT1/CASS4/GPRC5B	11
GO:0051017	actin filament bundle assembly	11/967	16/1831	0.151205	0.999326	0.999326	SORBS1/ARHGAP6/EPS8/BRAF/SPIRE1/ALMS1/RHPN2/ZEB2/RAPGEF3/GPR65/KCTD13	11
GO:0051224	negative regulation of protein transport	11/967	16/1831	0.151205	0.999326	0.999326	INSIG1/WWP2/ERLEC1/YOD1/ADRA2A/UBE2J1/RAB11FIP3/NDFIP2/RAB11FIP1/GNAZ/ANGPT1	11
GO:0071478	cellular response to radiation	11/967	16/1831	0.151205	0.999326	0.999326	TP53BP1/METTL3/PTPRK/NPM1/INTS7/CUL4B/SLC24A4/SIRT1/TANK/RRH/NET1	11
GO:0098930	axonal transport	11/967	16/1831	0.151205	0.999326	0.999326	TRAK2/SPAST/AP3B2/KIF3A/SPG7/FBXW11/TMEM108/HDAC6/AP3M2/MECP2/NETO1	11
GO:1904950	negative regulation of establishment of protein localization	11/967	16/1831	0.151205	0.999326	0.999326	INSIG1/WWP2/ERLEC1/YOD1/ADRA2A/UBE2J1/RAB11FIP3/NDFIP2/RAB11FIP1/GNAZ/ANGPT1	11
GO:1905477	positive regulation of protein localization to membrane	11/967	16/1831	0.151205	0.999326	0.999326	MFF/SORBS1/ACSL3/TCAF1/ZDHHC2/ATP2C1/MIEF1/ITGA3/ITGB2/MESD/ATP2B4	11
GO:1990138	neuron projection extension	11/967	16/1831	0.151205	0.999326	0.999326	SEMA5A/TIAM1/USP9X/TMEM108/ST8SIA2/SIN3A/CDKL3/HDAC6/MECP2/ZFYVE27/SPG11	11
GO:0048585	negative regulation of response to stimulus	107/967	189/1831	0.151848	0.999326	0.999326	WWTR1/INSIG1/IGSF1/SIRT3/BDNF/HTT/IRF4/NT5E/WTIP/TBC1D24/WWP2/RIN3/ZNF451/ERRFI1/HGF/DYRK2/TP53BP1/ABCA7/SEMA5A/METTL3/SNX25/SEC14L1/TLR4/BCL2/SYK/SH3BP4/SHLD2/EXTL3/SPRED1/HEY2/KBTBD7/WWOX/PTPN1/FGF10/GRK3/STAT1/THY1/PTPRE/TMEM127/WWC1/SMCHD1/RNF152/UBE3A/ASXL1/ADRA2A/SMPDL3B/GPD1L/RGS6/RFX8/HEYL/CBLB/EPN2/SLC24A4/WNK2/ING1/RGS17/SH3RF2/RIPOR2/SOD2/ERBIN/VRK3/MEAK7/THBD/SIRT1/EPM2A/SH3RF1/TANK/B…	107
GO:0008089	anterograde axonal transport	8/967	11/1831	0.15297	0.999326	0.999326	TRAK2/SPAST/AP3B2/KIF3A/SPG7/AP3M2/MECP2/NETO1	8
GO:0009308	amine metabolic process	8/967	11/1831	0.15297	0.999326	0.999326	IDO1/IDO2/GCDH/SLC29A4/ITGB2/SULT1A1/MECP2/ATP2B4	8
GO:0035023	regulation of Rho protein signal transduction	8/967	11/1831	0.15297	0.999326	0.999326	EPS8/RIPOR2/ITGA3/GPR65/STARD13/ABRA/NET1/KCTD13	8
GO:0045069	regulation of viral genome replication	8/967	11/1831	0.15297	0.999326	0.999326	APOBEC3D/APOBEC3F/BCL2/ADARB1/EIF2AK2/MAVS/TOP2B/HMGA2	8
GO:0045931	positive regulation of mitotic cell cycle	8/967	11/1831	0.15297	0.999326	0.999326	KLHL18/SHB/RPTOR/FGF10/CUL4B/SIN3A/MECP2/STAT5B	8
GO:0050688	regulation of defense response to virus	8/967	11/1831	0.15297	0.999326	0.999326	APOBEC3F/SEC14L1/STAT1/ZDHHC11/ERBIN/MAVS/SIN3A/CARD8	8
GO:0051100	negative regulation of binding	8/967	11/1831	0.15297	0.999326	0.999326	TTBK2/HEY2/PSME3IP1/SUMO3/HMGA2/ZFPM1/HFE/ATP2A2	8
GO:0061387	regulation of extent of cell growth	8/967	11/1831	0.15297	0.999326	0.999326	BDNF/SEMA5A/SIN3A/CDKL3/HDAC6/FSTL4/ZFYVE27/IST1	8
GO:0043603	amide metabolic process	72/967	125/1831	0.154333	0.999326	0.999326	MRPL44/SIRT3/FMR1/YARS1/GATB/CAPRIN1/WTIP/EIF4E3/ALDH4A1/ACSL3/PSEN2/ABCA7/RPTOR/LRPPRC/METTL3/NPM1/MRPL23/YTHDF1/HMGCS1/EEF1E1/BTD/BZW2/FTCD/FPGS/GSAP/ST3GAL3/LTO1/KHDRBS1/FTSJ1/MRPL2/BECN1/ALDH5A1/EIF2AK2/ACE/SMPDL3B/BACE1-AS/AGO1/ERO1B/DHFR2/SLC19A1/PTCD3/PLD1/IFNGR1/SLC1A2/UHMK1/ASAH1/MRPS35/ST8SIA2/MTG2/FUT5/GCDH/AGO4/PNPT1/POLDIP3/ARG2/SPTLC1/NIBAN1/FARSB/RC3H2/TNRC6B/B4GALT5/MRPS16/ABCB9/M…	72
GO:0034329	cell junction assembly	31/967	51/1831	0.155187	0.999326	0.999326	BDNF/SORBS1/STAU2/ARHGAP6/PTPRK/TBCD/GJC1/BCL2/MPP7/ACTN2/ZDHHC2/THY1/GABRA2/WDR1/ACE/FMN1/ST8SIA2/MPDZ/FZD1/EPB41L3/WHAMM/ADGRB3/PKP4/STRN/SRGAP2/MECP2/MUSK/NECTIN1/APLNR/PTPRA/IKBKB	31
GO:0016310	phosphorylation	91/967	160/1831	0.159972	0.999326	0.999326	WWTR1/TTBK2/BDNF/FMR1/HTT/HK1/RAD50/ERRFI1/GALK2/HGF/DYRK2/RPTOR/RAP2C/RICTOR/NPM1/STK16/MAP2K6/TLR4/BRAF/BCL2/SYK/ADARB1/IP6K2/TOLLIP/SPRED1/PTPN1/MAST4/FGF10/GRK3/IRAK4/THY1/KALRN/NEK10/EIF2AK2/ACE/ADRA2A/IPO7/GPD1L/MAPK10/RBL1/CBLB/PSKH1/EPHA5/WNK2/PTPRQ/DGKE/MAVS/UHMK1/VRK3/PRKD1/MAP3K7/SIRT1/FZD1/SLCO3A1/CACUL1/TRPM6/TNFSF18/KSR2/GPRC5A/CDKL3/DNAJC10/HDAC6/HMGA2/AK4/STRADB/WDFY2/STK10/NIBAN1…	91
GO:0002221	pattern recognition receptor signaling pathway	15/967	23/1831	0.161405	0.999326	0.999326	IRF4/SEC14L1/MAP2K6/TLR4/IRAK4/EIF2AK2/SMPDL3B/USP50/ERBIN/MAVS/PRKD1/MAP3K7/CARD8/GFI1/IKBKB	15
GO:0034764	positive regulation of transmembrane transport	15/967	23/1831	0.161405	0.999326	0.999326	HTT/SORBS1/ATP1B2/BRAF/ACTN2/JPH2/TCAF1/THY1/WNK2/SLC1A2/CAPN10/STIM1/AKAP9/APLNR/STIMATE	15
GO:0051168	nuclear export	15/967	23/1831	0.161405	0.999326	0.999326	FMR1/NPM1/KHDRBS1/UHMK1/PRKD1/RAPGEF3/POLDIP3/STRADB/YTHDC1/NCBP1/NCBP2/ATXN1/PPM1A/AGFG1/THOC3	15
GO:0009416	response to light stimulus	23/967	37/1831	0.162481	0.999326	0.999326	SLC24A1/HRH1/ABCA7/METTL3/KMT2A/PTPRK/NPM1/BRAF/BCL2/BHLHE40/CUL4B/MAPK10/SLC24A4/SLC1A2/FOXB1/SIRT1/CABP4/RRH/REV1/TAFA2/MECP2/NETO1/MSH6	23
GO:0001933	negative regulation of protein phosphorylation	19/967	30/1831	0.16376	0.999326	0.999326	WWTR1/ERRFI1/HGF/NPM1/ADARB1/SPRED1/PTPN1/THY1/IPO7/GPD1L/CBLB/PTPRQ/SIRT1/GPRC5A/DNAJC10/NIBAN1/SNX6/ANGPT1/RGS2	19
GO:0009914	hormone transport	19/967	30/1831	0.16376	0.999326	0.999326	SIRT3/VIP/SLC9B2/CPT1A/FOXL2/TIAM1/ADRA2A/RFX3/EPHA5/RAB11FIP3/CAPN10/TFAP2B/PRKD1/STXBP4/RAB11FIP1/TM7SF3/HFE/DOC2B/GNAZ	19
GO:0046879	hormone secretion	19/967	30/1831	0.16376	0.999326	0.999326	SIRT3/VIP/SLC9B2/CPT1A/FOXL2/TIAM1/ADRA2A/RFX3/EPHA5/RAB11FIP3/CAPN10/TFAP2B/PRKD1/STXBP4/RAB11FIP1/TM7SF3/HFE/DOC2B/GNAZ	19
GO:0099504	synaptic vesicle cycle	19/967	30/1831	0.16376	0.999326	0.999326	FMR1/TBC1D24/BRAF/AP3B2/VAMP4/CANX/FCHO2/ATP6V1B2/STXBP5/PLD1/GIT2/DNAJC5/PPFIA2/DOC2B/AP3M2/AMPH/ATP2A2/SYT11/STX2	19
GO:0051241	negative regulation of multicellular organismal process	58/967	100/1831	0.167143	0.999326	0.999326	CTSC/TTC21B/HGF/SEMA5A/MAP2K6/TLR4/VASH1/BCL2/EXTL3/SPRED1/HEY2/IDO1/STAT1/THY1/TPH1/TNFRSF13B/WWC1/WDR77/FIG4/ADRA2A/AGO1/CBLB/EPN2/ING1/IFNGR1/RAB11FIP3/RIPOR2/ERBIN/PTHLH/JARID2/THBD/RAB11FIP1/TIFAB/SIN3A/TNFSF18/ARG2/CDKL3/HDAC6/ADGRB3/ZFPM1/RNLS/HFE/RC3H2/CARD8/SINHCAF/FSTL4/SLC11A1/SOCS2/ATP2A2/RBBP7/SULF1/STARD13/SYT11/ANGPT1/MECP2/RGS2/FRZB/ATP2B4	58
GO:0006816	calcium ion transport	28/967	46/1831	0.168863	0.999326	0.999326	FMR1/HTT/SLC24A1/PSEN2/BCL2/XCR1/JPH2/THY1/ACE/ADRA2A/ATP2C1/NCS1/SLC24A4/PRKD1/TRPM6/CABP4/STIM1/CCR5/GRIN3A/MCOLN2/ATP2A2/CAMK2B/UBR3/APLNR/DNM1L/ATP2B4/STIMATE/SPG11	28
GO:0016050	vesicle organization	28/967	46/1831	0.168863	0.999326	0.999326	INSIG1/VIPAS39/VTI1A/AP3B2/VPS36/BCL2/VAMP4/CCDC136/NECTIN2/ATP6V1B2/TMEM127/USP50/VPS41/STX7/ZEB2/SHROOM2/TMCC1/VTA1/HPS5/PLEKHM1/DOC2B/AP3M2/SYT11/RAB22A/IST1/STX2/SPG11/AGFG1	28
GO:2000146	negative regulation of cell motility	28/967	46/1831	0.168863	0.999326	0.999326	RIN3/RAP2C/PTPRK/GNA12/ATP1B2/VASH1/BRAF/BCL2/ADARB1/ARPIN/ADORA3/SPRED1/TCAF1/THY1/ZEB2/FRMD5/ING1/RIPOR2/SIN3A/MITF/GCSAM/SINHCAF/RBBP7/SULF1/STARD13/SRGAP2/MECP2/ATP2B4	28
GO:0060284	regulation of cell development	48/967	82/1831	0.17134	0.999326	0.999326	BDNF/IRF4/CAPRIN1/TBC1D24/STAU2/SHB/FAM210B/RPTOR/SEMA5A/METTL3/SLC9B2/TLR4/BRAF/SOS1/BCL2/SYK/ING5/ARID1B/TIAM1/BHLHE40/HEY2/HOXB8/STAT1/THY1/BRD1/ETV5/ACE/HEYL/RFX3/PTHLH/SH3RF1/TNFSF18/CDKL3/HDAC6/ZFPM1/MITF/CAMK4/RC3H2/KAT6B/FSTL4/CAMK2B/MECP2/FRZB/ZFYVE27/IST1/STAT5B/IKBKB/SS18L1	48
GO:0022411	cellular component disassembly	33/967	55/1831	0.171924	0.999326	0.999326	TTBK2/HTT/MID1/SPATA18/SEMA5A/SPATA33/SPAST/EPS8/FOXL2/ACTN2/KLC1/BECN1/WDR1/SNX7/GRWD1/MMP13/CAPN10/APAF1/SETX/HUWE1/VTA1/HDAC6/ADGRB3/ZFAND1/TRIM54/LMOD1/ATXN7/ATP2A2/SET/RETREG1/MARK2/IST1/DNM1L	33
GO:0002753	cytosolic pattern recognition receptor signaling pathway	12/967	18/1831	0.172408	0.999326	0.999326	SEC14L1/MAP2K6/TLR4/IRAK4/EIF2AK2/USP50/ERBIN/MAVS/PRKD1/MAP3K7/CARD8/IKBKB	12
GO:0008406	gonad development	12/967	18/1831	0.172408	0.999326	0.999326	BCL2/FOXL2/IRX5/UBE3A/ACE/WDR48/SIRT1/AGO4/FGF9/TIPARP/DNAAF11/STAT5B	12
GO:0043244	regulation of protein-containing complex disassembly	12/967	18/1831	0.172408	0.999326	0.999326	TTBK2/MID1/SEMA5A/SPAST/EPS8/ACTN2/WDR1/SETX/HDAC6/TRIM54/LMOD1/ATXN7	12
GO:0045137	development of primary sexual characteristics	12/967	18/1831	0.172408	0.999326	0.999326	BCL2/FOXL2/IRX5/UBE3A/ACE/WDR48/SIRT1/AGO4/FGF9/TIPARP/DNAAF11/STAT5B	12
GO:1904659	glucose transmembrane transport	12/967	18/1831	0.172408	0.999326	0.999326	SORBS1/BRAF/ACE/SLC1A2/CAPN10/STXBP4/SLC5A2/ASPSCR1/MFSD4A/SLC2A11/SLC45A2/SLC2A12	12
GO:0031331	positive regulation of cellular catabolic process	24/967	39/1831	0.173445	0.999326	0.999326	HTT/CAPRIN1/RPTOR/METTL3/YTHDF1/CPT1A/SH3BP4/GRSF1/PTPN1/SNX18/BECN1/RNF152/ADRA2A/SNX7/PRKD1/MAP3K7/SIRT1/EPM2A/PNPT1/SPTLC1/RC3H2/TNRC6B/PRXL2C/TRIM13	24
GO:0062197	cellular response to chemical stress	24/967	39/1831	0.173445	0.999326	0.999326	TBC1D24/STAU2/HGF/RPTOR/PTPRK/VKORC1L1/KDM6B/ETV5/BECN1/GPX8/SOD2/PRKD1/TOP2B/MEAK7/SIRT1/TIFAB/SETX/SIN3A/PNPT1/HDAC6/PPARGC1A/ATP2A2/NET1/STX2	24
GO:0043085	positive regulation of catalytic activity	54/967	93/1831	0.17505	0.999326	0.999326	SIRT3/RAD50/PSEN2/RPTOR/ARHGAP6/GNA12/TLR4/SOS1/POR/SYK/FOXL2/TIAM1/ADORA3/PTPN1/THY1/SNX18/NEK10/ACE/ADRA2A/USP50/RGS6/GARNL3/PRKD1/APAF1/MAP3K7/RAPGEF3/SIRT1/TANK/CACUL1/STIM1/GPR65/HMGA2/PKP4/STRADB/ARHGAP27/ITGB2/CARD8/SLC11A1/AGAP1/AGAP4/ANGPT1/SRGAP2/NHEJ1/MARK2/ISCU/ARRDC4/MUSK/CASS4/TBC1D9B/BORA/ATP2B4/GPRC5B/NET1/MSH6	54
GO:0045089	positive regulation of innate immune response	20/967	32/1831	0.17672	0.999326	0.999326	IRF4/SEC14L1/MAP2K6/TLR4/SYK/NECTIN2/IRAK4/EIF2AK2/SMPDL3B/USP50/NCR3/ERBIN/MAVS/PRKD1/MAP3K7/SIN3A/CARD8/STAT5B/GFI1/IKBKB	20
GO:0048511	rhythmic process	20/967	32/1831	0.17672	0.999326	0.999326	METTL3/KMT2A/MAP2K6/BHLHE40/TPH1/USP9X/UBE3A/THRAP3/MAPK10/FBXW11/SIRT1/SETX/SIN3A/HUWE1/GRIN3A/PPARGC1A/DNM1L/STAT5B/ENOX2/HLF	20
GO:0071375	cellular response to peptide hormone stimulus	20/967	32/1831	0.17672	0.999326	0.999326	INSIG1/SORBS1/GAB1/SOS1/ARID1B/ACTN2/PTPN1/STAT1/PTPRE/CAPN10/PRKD1/STXBP4/MAP3K7/SIRT1/GRB14/SOCS2/STAT5A/IDE/STAT5B/PTPRA	20
GO:0002758	innate immune response-activating signaling pathway	16/967	25/1831	0.177383	0.999326	0.999326	IRF4/SEC14L1/MAP2K6/TLR4/SYK/IRAK4/EIF2AK2/SMPDL3B/USP50/ERBIN/MAVS/PRKD1/MAP3K7/CARD8/GFI1/IKBKB	16
GO:0008643	carbohydrate transport	16/967	25/1831	0.177383	0.999326	0.999326	SORBS1/BRAF/AQP9/ACE/SLC35A5/SLC1A2/CAPN10/STXBP4/SLC37A3/SLC5A2/ASPSCR1/MFSD4A/SLC35A3/SLC2A11/SLC45A2/SLC2A12	16
GO:0044703	multi-organism reproductive process	16/967	25/1831	0.177383	0.999326	0.999326	SP3/SLC38A3/BCL2/STOX2/IDO1/ACE/ADRA2A/SLC19A1/PTHLH/THBD/ITGA3/PTGFR/HFE/RGS2/STAT5B/SMURF2	16
GO:0044706	multi-multicellular organism process	16/967	25/1831	0.177383	0.999326	0.999326	SP3/SLC38A3/BCL2/STOX2/IDO1/ACE/ADRA2A/SLC19A1/PTHLH/THBD/ITGA3/PTGFR/HFE/RGS2/STAT5B/SMURF2	16
GO:0046777	protein autophosphorylation	16/967	25/1831	0.177383	0.999326	0.999326	RAD50/ERRFI1/RAP2C/STK16/NEK10/EIF2AK2/ACE/WNK2/UHMK1/PRKD1/STK10/CAMK4/HTATIP2/CAMK2B/MARK2/MUSK	16
GO:0051924	regulation of calcium ion transport	16/967	25/1831	0.177383	0.999326	0.999326	FMR1/HTT/PSEN2/BCL2/JPH2/THY1/ACE/ADRA2A/PRKD1/CABP4/STIM1/CAMK2B/UBR3/APLNR/STIMATE/SPG11	16
GO:0007265	Ras protein signal transduction	29/967	48/1831	0.178198	0.999326	0.999326	G3BP2/ARHGAP6/RAP2C/GNA12/RAB33B/EPS8/SOS1/TIAM1/GPSM2/KBTBD7/FGF10/ADRA2A/USP50/PLD1/GIT2/ARFGAP1/RIPOR2/RAPGEF3/KSR2/SSX2IP/ITGA3/GPR65/RABL3/STARD13/RAB4A/ABRA/ARFGEF1/NET1/KCTD13	29
GO:0006811	monoatomic ion transport	84/967	148/1831	0.179738	0.999326	0.999326	FMR1/HTT/VIP/SLC24A1/WWP2/SLC9A7/SLC25A37/SLC38A3/PSEN2/KCNAB2/ATP8B2/YWHAQ/SLC9B2/ATP1B2/SLC6A1/GJC1/ANO5/BCL2/ABCC4/GLRB/KCNQ3/ACTN2/XCR1/JPH2/ATP6V1B2/TCAF1/ABCC9/THY1/NKAIN3/GABRA2/SLC22A5/ACE/ADRA2A/ATP2C1/SFXN5/GPD1L/ATP4B/NCS1/SLC19A1/SLC24A4/WNK2/SLC6A6/NDFIP2/SLC1A2/GABRR2/PRKD1/SHROOM2/KCNA1/KCNJ13/SLCO3A1/SLC5A2/SLC6A13/TRPM6/SFXN2/CABP4/STIM1/SLC29A4/CCR5/SLC10A7/SLC4A7/HFE/GRIN3A/KCN…	84
GO:0009896	positive regulation of catabolic process	34/967	57/1831	0.180098	0.999326	0.999326	FMR1/HTT/VIP/CAPRIN1/RPTOR/METTL3/YTHDF1/CPT1A/SH3BP4/GRSF1/PTPN1/SNX18/CUL4B/BECN1/RNF152/ADRA2A/SNX7/CBLB/USP13/SH3RF2/PRKD1/MAP3K7/SIRT1/EPM2A/SH3RF1/PNPT1/SPTLC1/RC3H2/TIPARP/TNRC6B/PRXL2C/TRIM13/IDE/UBR3	34
GO:0001938	positive regulation of endothelial cell proliferation	9/967	13/1831	0.181771	0.999326	0.999326	VIP/RPTOR/SEMA5A/RICTOR/FGF10/PRKD1/SIRT1/STAT5A/APLNR	9
GO:0006766	vitamin metabolic process	9/967	13/1831	0.181771	0.999326	0.999326	ACP3/BTD/FPGS/VKORC1L1/BCO1/DHFR2/SLC19A1/SLC25A32/GFI1	9
GO:0016525	negative regulation of angiogenesis	9/967	13/1831	0.181771	0.999326	0.999326	VASH1/SPRED1/STAT1/AGO1/EPN2/ADGRB3/SULF1/MECP2/ATP2B4	9
GO:0030038	contractile actin filament bundle assembly	9/967	13/1831	0.181771	0.999326	0.999326	SORBS1/ARHGAP6/BRAF/ALMS1/RHPN2/ZEB2/RAPGEF3/GPR65/KCTD13	9
GO:0031110	regulation of microtubule polymerization or depolymerization	9/967	13/1831	0.181771	0.999326	0.999326	TTBK2/MID1/SPAST/TBCD/HDAC6/TRIM54/ATXN7/AKAP9/MECP2	9
GO:0035195	miRNA-mediated post-transcriptional gene silencing	9/967	13/1831	0.181771	0.999326	0.999326	FMR1/WTIP/MIR29B2CHG/AGO1/AGO4/TNRC6B/NCBP1/MECP2/NCBP2	9
GO:0036465	synaptic vesicle recycling	9/967	13/1831	0.181771	0.999326	0.999326	TBC1D24/AP3B2/VAMP4/CANX/FCHO2/GIT2/AP3M2/AMPH/SYT11	9
GO:0043149	stress fiber assembly	9/967	13/1831	0.181771	0.999326	0.999326	SORBS1/ARHGAP6/BRAF/ALMS1/RHPN2/ZEB2/RAPGEF3/GPR65/KCTD13	9
GO:0046434	organophosphate catabolic process	9/967	13/1831	0.181771	0.999326	0.999326	NT5E/DPYD/SMPDL3B/GPD1L/PLD1/ENTPD4/ABHD12B/ENPP6/MLYCD	9
GO:0071902	positive regulation of protein serine/threonine kinase activity	9/967	13/1831	0.181771	0.999326	0.999326	RPTOR/TLR4/PTPN1/NEK10/ADRA2A/MAP3K7/SIRT1/HMGA2/ATP2B4	9
GO:1901343	negative regulation of vasculature development	9/967	13/1831	0.181771	0.999326	0.999326	VASH1/SPRED1/STAT1/AGO1/EPN2/ADGRB3/SULF1/MECP2/ATP2B4	9
GO:2000142	regulation of DNA-templated transcription initiation	9/967	13/1831	0.181771	0.999326	0.999326	ZNF451/HEY2/CAND1/THRA/SETX/MITF/TAF3/GTF2A1/MED17	9
GO:2000181	negative regulation of blood vessel morphogenesis	9/967	13/1831	0.181771	0.999326	0.999326	VASH1/SPRED1/STAT1/AGO1/EPN2/ADGRB3/SULF1/MECP2/ATP2B4	9
GO:0043254	regulation of protein-containing complex assembly	25/967	41/1831	0.184113	0.999326	0.999326	RICTOR/FCHSD1/TLR4/EPS8/TBCD/SYK/MPP7/CAND1/THRA/EIF2AK2/USP50/VPS41/ARPC5L/STXBP5/MAVS/PRKD1/FMN1/TNFSF18/HDAC6/LMOD1/CARD8/ARHGAP40/AKAP9/MECP2/ARFGEF1	25
GO:0010506	regulation of autophagy	21/967	34/1831	0.189208	0.999326	0.999326	HTT/HGF/EXOC7/RPTOR/BCL2/SH3BP4/ATP6V1B2/SNX18/BECN1/RNF152/SNX7/USP13/PRKD1/MAP3K7/SIRT1/EPM2A/HDAC6/SPTLC1/SNX6/TRIM13/DNM1L	21
GO:0050767	regulation of neurogenesis	21/967	34/1831	0.189208	0.999326	0.999326	BDNF/CAPRIN1/TBC1D24/STAU2/SEMA5A/BRAF/TIAM1/BHLHE40/HEY2/THY1/ETV5/ACE/HEYL/CDKL3/HDAC6/FSTL4/CAMK2B/MECP2/ZFYVE27/IST1/SS18L1	21
GO:0090596	sensory organ morphogenesis	21/967	34/1831	0.189208	0.999326	0.999326	INSIG1/NECTIN3/STAU2/SP3/BCL2/FOXL2/FGF10/THY1/WHRN/TFAP2B/SHROOM2/TIFAB/CABP4/DZANK1/FGF9/ALDH1A3/TMEM215/FAT3/FRZB/NECTIN1/MYO3B	21
GO:0043604	amide biosynthetic process	51/967	88/1831	0.189352	0.999326	0.999326	MRPL44/SIRT3/FMR1/YARS1/GATB/CAPRIN1/WTIP/EIF4E3/ACSL3/LRPPRC/METTL3/NPM1/MRPL23/YTHDF1/EEF1E1/BZW2/ST3GAL3/LTO1/KHDRBS1/FTSJ1/MRPL2/EIF2AK2/BACE1-AS/AGO1/PTCD3/PLD1/SLC1A2/UHMK1/ASAH1/MRPS35/ST8SIA2/MTG2/GCDH/AGO4/PNPT1/POLDIP3/ARG2/SPTLC1/NIBAN1/FARSB/RC3H2/TNRC6B/B4GALT5/MRPS16/MRPL42/NCBP1/RGS2/NCBP2/MLYCD/ELOVL7/ASAH2	51
GO:0022607	cellular component assembly	182/967	330/1831	0.189726	0.999326	0.999326	WWTR1/TTBK2/BDNF/FMR1/HTT/VIPAS39/G3BP2/CAPRIN1/SORBS1/STAU2/TCF4/TTC21B/ACSL3/TP53BP1/ABCA7/ARHGAP6/RICTOR/KMT2A/PTPRK/NPM1/FCHSD1/YTHDF1/RAB33B/GORASP2/TLR4/UBTF/SPAST/EPS8/BRAF/VPS36/TBCD/GJC1/BCL2/SYK/MPP7/BBOF1/CC2D2B/ABCC4/VAMP4/DNAJB14/TIAM1/GPSM2/FCHO2/KCNQ3/ACTN2/SPIRE1/CCDC136/HEY2/WDR35/CAND1/NECTIN2/KIF3A/ALMS1/TMEM107/ZDHHC2/THRA/HGSNAT/THY1/IFT22/SNX18/PTPDC1/GABRA2/BECN1/EIF2AK2/WD…	182
GO:0016241	regulation of macroautophagy	13/967	20/1831	0.192027	0.999326	0.999326	HTT/EXOC7/ATP6V1B2/SNX18/BECN1/SNX7/MAP3K7/SIRT1/EPM2A/HDAC6/SPTLC1/SNX6/TRIM13	13
GO:0072384	organelle transport along microtubule	13/967	20/1831	0.192027	0.999326	0.999326	HTT/LRPPRC/TRAK2/BICD2/SPAST/AP3B2/KIF3A/BICDL1/FBXW11/HDAC6/AP3M2/MECP2/TMEM201	13
GO:0032774	RNA biosynthetic process	236/967	431/1831	0.1924	0.999326	0.999326	WWTR1/IGSF1/SRA1/FMR1/MXD4/ZNF195/IRF4/G3BP2/CAMTA1/PTOV1/ZNF19/WTIP/RNF2/WWP2/ZNF451/ZNF264/APOBEC3D/TCF4/SP3/SLC38A3/TTC21B/HGF/TP53BP1/PKNOX1/RPTOR/APOBEC3F/ZNF526/ZNF391/RAP2C/RAX/E2F5/KMT2A/GTF3C3/PTPRK/NPM1/WDR43/ZNF286A/ZNF236/TESMIN/YWHAQ/GMEB2/STK16/ZNF362/NFE2L1/TLR4/ZNF493/UBTF/ZNF793/INTS7/SOS1/ZNF546/HOXD3/ZNF383/SYK/ING5/CBX6/FOXL2/ARID1B/L3MBTL4/ZNF516/TCEA3/ADORA3/BHLHE40/ZNF41/ZN…	236
GO:0050730	regulation of peptidyl-tyrosine phosphorylation	17/967	27/1831	0.192551	0.999326	0.999326	ERRFI1/HGF/RAP2C/RICTOR/SYK/PTPN1/FGF10/ACE/ADRA2A/CBLB/TNFSF18/GPRC5A/ITGB2/SNX6/ANGPT1/CASS4/GPRC5B	17
GO:0051098	regulation of binding	17/967	27/1831	0.192551	0.999326	0.999326	TTBK2/BDNF/FMR1/TIAM1/HEY2/PINX1/PSME3IP1/USP9X/RIPOR2/SUMO3/HMGA2/ZFPM1/HFE/ATP2A2/NCBP1/IDE/MARK2	17
GO:0060485	mesenchyme development	17/967	27/1831	0.192551	0.999326	0.999326	WWTR1/HGF/SEMA5A/BCL2/TIAM1/SPRED1/HEY2/FGF10/STAT1/HEYL/MDM4/HMGA2/FGF9/POGLUT1/FRZB/NCAM1/APLNR	17
GO:0060560	developmental growth involved in morphogenesis	17/967	27/1831	0.192551	0.999326	0.999326	BDNF/WNT7B/SEMA5A/TIAM1/FGF10/USP9X/TMEM108/FMN1/ST8SIA2/SIN3A/CDKL3/HDAC6/FSTL4/MECP2/ZFYVE27/IST1/SPG11	17
GO:2001141	regulation of RNA biosynthetic process	229/967	418/1831	0.19395	0.999326	0.999326	WWTR1/IGSF1/SRA1/MXD4/ZNF195/IRF4/G3BP2/CAMTA1/PTOV1/ZNF19/WTIP/RNF2/WWP2/ZNF451/ZNF264/APOBEC3D/TCF4/SP3/SLC38A3/TTC21B/HGF/TP53BP1/PKNOX1/RPTOR/APOBEC3F/ZNF526/ZNF391/RAP2C/RAX/E2F5/KMT2A/PTPRK/NPM1/WDR43/ZNF286A/ZNF236/TESMIN/YWHAQ/GMEB2/STK16/ZNF362/NFE2L1/TLR4/ZNF493/UBTF/ZNF793/INTS7/SOS1/ZNF546/HOXD3/ZNF383/SYK/ING5/CBX6/FOXL2/ARID1B/L3MBTL4/ZNF516/ADORA3/BHLHE40/ZNF41/ZNF208/STOX2/KHDRBS1…	229
GO:0002250	adaptive immune response	26/967	43/1831	0.194492	0.999326	0.999326	CTSC/IRF4/TP53BP1/TNFRSF13C/TLR4/SYK/SHLD2/NECTIN2/IGHG3/C4B/TNFRSF13B/CD209/STX7/MAP3K7/RAPGEF3/SIRT1/TNFSF18/ARG2/STAT4/HFE/JCHAIN/CAMK4/RC3H2/MCOLN2/SLC11A1/MSH6	26
GO:0032535	regulation of cellular component size	26/967	43/1831	0.194492	0.999326	0.999326	BDNF/RIN3/WNT7B/RPTOR/SEMA5A/RICTOR/NPM1/FCHSD1/EPS8/ACTN2/WDR1/ARPC5L/PRKD1/FMN1/MAP3K7/SIN3A/CDKL3/HDAC6/LMOD1/ARHGAP40/FSTL4/RAB22A/ZFYVE27/IST1/ARFGEF1/MYO3B	26
GO:0044282	small molecule catabolic process	26/967	43/1831	0.194492	0.999326	0.999326	HK1/GLDC/APOBEC3D/ALDH4A1/ETFBKMT/APOBEC3F/CPT1A/FTCD/IDO1/ACAD10/ALDH5A1/DPYD/FUT2/IDO2/ENTPD4/AIG1/FUT5/GCDH/ENPP4/ARG2/SULT1A1/LDHD/GLYCTK/ATP2B4/MLYCD/FUT10	26
GO:1901652	response to peptide	31/967	52/1831	0.196292	0.999326	0.999326	INSIG1/SORBS1/GAB1/TLR4/BRAF/SOS1/ARID1B/ACTN2/PTPN1/STAT1/PTPRE/SLC24A4/GCNT1/ERBIN/MMP13/CAPN10/PRKD1/STXBP4/MEAK7/MAP3K7/SIRT1/PNPT1/GRB14/STAT4/SRSF4/SNX6/SOCS2/STAT5A/IDE/STAT5B/PTPRA	31
GO:0006790	sulfur compound metabolic process	22/967	36/1831	0.201243	0.999326	0.999326	ACSL3/ACP3/HMGCS1/BTD/ST3GAL3/EXTL3/HGSNAT/BHMT2/GCDH/SULT4A1/SLC10A7/HS2ST1/SULT1A1/ISCA1/MAT2B/ANGPT1/STAT5A/ISCU/STAT5B/MLYCD/ELOVL7/UST	22
GO:0043269	regulation of monoatomic ion transport	37/967	63/1831	0.203834	0.999326	0.999326	FMR1/HTT/VIP/WWP2/PSEN2/KCNAB2/YWHAQ/ATP1B2/BCL2/KCNQ3/ACTN2/JPH2/TCAF1/THY1/NKAIN3/ACE/ADRA2A/GPD1L/WNK2/PRKD1/KCNA1/KCNJ13/CABP4/STIM1/HFE/KCNQ5/CAMK2B/AKAP9/NETO1/ISCU/UBR3/KCNC4/APLNR/ATP2B4/STIMATE/SPG11/KCNJ5	37
GO:0006355	regulation of DNA-templated transcription	226/967	413/1831	0.204171	0.999326	0.999326	WWTR1/IGSF1/SRA1/MXD4/ZNF195/IRF4/G3BP2/CAMTA1/PTOV1/ZNF19/WTIP/RNF2/WWP2/ZNF451/ZNF264/TCF4/SP3/SLC38A3/TTC21B/HGF/TP53BP1/PKNOX1/RPTOR/ZNF526/ZNF391/RAP2C/RAX/E2F5/KMT2A/PTPRK/NPM1/WDR43/ZNF286A/ZNF236/TESMIN/YWHAQ/GMEB2/STK16/ZNF362/NFE2L1/TLR4/ZNF493/UBTF/ZNF793/INTS7/SOS1/ZNF546/HOXD3/ZNF383/SYK/ING5/CBX6/FOXL2/ARID1B/L3MBTL4/ZNF516/ADORA3/BHLHE40/ZNF41/ZNF208/STOX2/KHDRBS1/ACTN2/ZFPL1/HEY2/…	226
GO:0030336	negative regulation of cell migration	27/967	45/1831	0.204589	0.999326	0.999326	RIN3/RAP2C/PTPRK/GNA12/ATP1B2/VASH1/BRAF/BCL2/ADARB1/ARPIN/ADORA3/SPRED1/TCAF1/THY1/ZEB2/ING1/RIPOR2/SIN3A/MITF/GCSAM/SINHCAF/RBBP7/SULF1/STARD13/SRGAP2/MECP2/ATP2B4	27
GO:0043434	response to peptide hormone	27/967	45/1831	0.204589	0.999326	0.999326	INSIG1/SORBS1/GAB1/BRAF/SOS1/ARID1B/ACTN2/PTPN1/STAT1/PTPRE/SLC24A4/GCNT1/CAPN10/PRKD1/STXBP4/MEAK7/MAP3K7/SIRT1/PNPT1/GRB14/STAT4/SRSF4/SOCS2/STAT5A/IDE/STAT5B/PTPRA	27
GO:0001525	angiogenesis	32/967	54/1831	0.205056	0.999326	0.999326	CCBE1/SHB/GAB1/PKNOX1/SEMA5A/VASH1/SYK/SPRED1/FGF10/STAT1/THY1/ACE/AGO1/FMNL3/EPN2/POFUT1/PRKD1/RAPGEF3/SIRT1/STIM1/HMGA2/ADGRB3/HTATIP2/FGF9/TMEM215/SULF1/STARD13/C1GALT1/ANGPT1/MECP2/APLNR/ATP2B4	32
GO:0044085	cellular component biogenesis	196/967	357/1831	0.205537	0.999326	0.999326	WWTR1/MRPL44/TTBK2/SIRT3/BDNF/FMR1/HTT/VIPAS39/G3BP2/CAPRIN1/SORBS1/STAU2/TCF4/TTC21B/ACSL3/TP53BP1/ABCA7/ARHGAP6/RICTOR/KMT2A/PTPRK/NPM1/WDR43/FCHSD1/YTHDF1/RAB33B/GORASP2/TLR4/UTP25/UBTF/SPAST/EPS8/BRAF/VPS36/TBCD/GJC1/BCL2/SYK/MPP7/BBOF1/CC2D2B/ABCC4/VAMP4/DNAJB14/TIAM1/GPSM2/LTO1/FCHO2/KCNQ3/ACTN2/SPIRE1/CCDC136/HEY2/SETDB2/WDR35/CAND1/NECTIN2/KIF3A/ALMS1/TMEM107/ZDHHC2/THRA/TMA16/HGSNAT/THY1…	196
GO:0048608	reproductive structure development	18/967	29/1831	0.206963	0.999326	0.999326	BCL2/FOXL2/IRX5/FGF10/FEM1B/WDR77/UBE3A/ACE/WDR48/PSAPL1/SIRT1/TIFAB/AGO4/FGF9/TIPARP/SULF1/DNAAF11/STAT5B	18
GO:0061458	reproductive system development	18/967	29/1831	0.206963	0.999326	0.999326	BCL2/FOXL2/IRX5/FGF10/FEM1B/WDR77/UBE3A/ACE/WDR48/PSAPL1/SIRT1/TIFAB/AGO4/FGF9/TIPARP/SULF1/DNAAF11/STAT5B	18
GO:0002367	cytokine production involved in immune response	10/967	15/1831	0.207258	0.999326	0.999326	HK1/TLR4/SYK/UBE2J1/MAVS/MAP3K7/SIRT1/HFE/ANGPT1/GPRC5B	10
GO:0002718	regulation of cytokine production involved in immune response	10/967	15/1831	0.207258	0.999326	0.999326	HK1/TLR4/SYK/UBE2J1/MAVS/MAP3K7/SIRT1/HFE/ANGPT1/GPRC5B	10
GO:0006892	post-Golgi vesicle-mediated transport	10/967	15/1831	0.207258	0.999326	0.999326	SYS1/VTI1A/ACSL3/KIF16B/ATP2C1/EXOC2/SORCS1/ARFRP1/CCDC93/AP4M1	10
GO:0019079	viral genome replication	10/967	15/1831	0.207258	0.999326	0.999326	FMR1/APOBEC3D/APOBEC3F/BCL2/ADARB1/CD209/EIF2AK2/MAVS/TOP2B/HMGA2	10
GO:0034101	erythrocyte homeostasis	10/967	15/1831	0.207258	0.999326	0.999326	SP3/FAM210B/PKNOX1/THRA/STAT1/BRD1/ZFPM1/SLC25A40/SFXN1/STAT5B	10
GO:0006457	protein folding	14/967	22/1831	0.21023	0.999326	0.999326	DNAJC21/TBCD/UGGT1/DNAJB14/CANX/FKBP5/DNAJB12/ERO1B/DNAJC5/DNAJC10/MESD/PDIA4/FUT10/VBP1	14
GO:0007548	sex differentiation	14/967	22/1831	0.21023	0.999326	0.999326	BCL2/FOXL2/IRX5/FGF10/UBE3A/ACE/WDR48/SIRT1/TIFAB/AGO4/FGF9/TIPARP/DNAAF11/STAT5B	14
GO:0007613	memory	14/967	22/1831	0.21023	0.999326	0.999326	BDNF/HRH1/ABCA7/YTHDF1/SLC6A1/ITGA3/CAMK4/TAFA2/SYT11/MECP2/NETO1/MUSK/ATXN1/SPG11	14
GO:0008154	actin polymerization or depolymerization	14/967	22/1831	0.21023	0.999326	0.999326	ARHGAP6/SEMA5A/RICTOR/FCHSD1/EPS8/ENAH/ACTN2/SPIRE1/WDR1/ARPC5L/FMN1/LMOD1/ARHGAP40/ARFGEF1	14
GO:0033673	negative regulation of kinase activity	14/967	22/1831	0.21023	0.999326	0.999326	WWTR1/ERRFI1/NPM1/ADARB1/SPRED1/PTPN1/THY1/IPO7/CBLB/PTPRQ/SIRT1/GPRC5A/SNX6/RGS2	14
GO:0006897	endocytosis	49/967	85/1831	0.211245	0.999326	0.999326	LMAN2/FMR1/VIPAS39/TBC1D24/RIN3/ABCA7/SYNRG/SLC9B2/TLR4/AP3B2/SYK/SH3BP4/VAMP4/CANX/FCHO2/EPS15L1/SNX1/GULP1/PTPN1/GRK3/SNX18/C4B/BECN1/CD209/GPR107/UBE3A/EPN2/ATP9B/ARFGAP1/LMBRD1/TMEM108/PRKD1/LRP12/ACKR2/HFE/SURF4/ARHGAP27/ITGB2/MESD/AP3M2/SLC11A1/AMPH/RAB4A/SYT11/ANGPT1/NECAP2/RAB22A/DNM1L/SPG11	49
GO:0031401	positive regulation of protein modification process	55/967	96/1831	0.212671	0.999326	0.999326	BDNF/FMR1/CAMTA1/RAD50/HGF/RPTOR/RAP2C/RICTOR/GNA12/NPM1/MAP2K6/TLR4/BRAF/BCL2/SYK/IP6K2/TOLLIP/PTPN1/FGF10/NEK10/UBE3A/ACE/ADRA2A/CBLB/NDFIP2/POMT1/MAVS/PRKD1/MAP3K7/SIRT1/TANK/FZD1/SLCO3A1/HUWE1/CACUL1/TNFSF18/ASPSCR1/HDAC6/HMGA2/STRADB/WDFY2/NIBAN1/FGF9/SLC11A1/PPARGC1A/AKAP9/ANGPT1/MARK2/ARRDC4/MUSK/APLNR/CASS4/BORA/ATP2B4/GPRC5B	55
GO:0098542	defense response to other organism	55/967	96/1831	0.212671	0.999326	0.999326	MX2/IRF4/G3BP2/IFNAR2/HK1/APOBEC3D/APOBEC3F/METTL3/SEC14L1/MAP2K6/TLR4/BCL2/SYK/ADARB1/TOLLIP/SPIRE1/NECTIN2/PTPN1/IGHG3/ABCC9/STAT1/IRAK4/ZDHHC11/C4B/BECN1/SLC22A5/CD209/EIF2AK2/IPO7/TRIM52/SMPDL3B/USP50/USP44/IFNGR1/NCR3/ERBIN/MAVS/PRKD1/STXBP4/MAP3K7/TANK/SIN3A/ARG2/ANKHD1/JCHAIN/MCOLN2/CARD8/H2BC6/SLC11A1/TRIM13/NCBP1/SYT11/STAT5B/GFI1/IKBKB	55
GO:0003018	vascular process in circulatory system	23/967	38/1831	0.212846	0.999326	0.999326	HRH1/SLC38A3/ATP1B2/SLC6A1/ABCC4/ABCC9/SLC16A7/SLC22A5/ACE/ADRA2A/SLC19A1/ZEB2/SLC6A6/SLC1A2/SOD2/SLCO3A1/SLC6A13/SLC29A4/UTS2B/FGFBP3/ANGPT1/RGS2/ATP2B4	23
GO:0042325	regulation of phosphorylation	61/967	107/1831	0.213142	0.999326	0.999326	WWTR1/BDNF/FMR1/HTT/RAD50/ERRFI1/HGF/RPTOR/RAP2C/RICTOR/NPM1/MAP2K6/TLR4/BRAF/BCL2/SYK/ADARB1/IP6K2/SPRED1/PTPN1/FGF10/THY1/NEK10/ACE/ADRA2A/IPO7/GPD1L/RBL1/CBLB/PTPRQ/MAVS/PRKD1/MAP3K7/SIRT1/FZD1/SLCO3A1/CACUL1/TNFSF18/GPRC5A/DNAJC10/HDAC6/HMGA2/STRADB/WDFY2/NIBAN1/ITGB2/SNX6/WDR91/FGF9/SLC11A1/AKAP9/ANGPT1/RGS2/MARK2/MUSK/APLNR/CASS4/BORA/ATP2B4/GPRC5B/IKBKB	61
GO:0120036	plasma membrane bounded cell projection organization	106/967	190/1831	0.214489	0.999326	0.999326	WWTR1/TTBK2/BDNF/FMR1/HTT/CAPRIN1/TBC1D24/STAU2/TTC21B/WNT7B/SEMA5A/YTHDF1/ATP1B2/SPAST/EPS8/BRAF/SOS1/ENAH/BCL2/BBOF1/CC2D2B/ABCC4/ADARB1/ARPIN/TIAM1/SNX1/ACTN2/WDR35/NECTIN2/KIF3A/TMEM107/THY1/IFT22/PTPDC1/CUL4B/KALRN/BICDL1/USP9X/RPGR/WHRN/FMNL3/NCS1/PLD1/NEXN/RFX3/EPHA5/EFHC2/GORAB/RAB11FIP3/RIPOR2/TMEM108/RABL2B/UHMK1/FOXB1/PRKD1/TOP2B/MYO10/KCNA1/ST8SIA2/TMEM67/JHY/ZDHHC17/FZD1/LRP12/SETX/S…	106
GO:0010648	negative regulation of cell communication	93/967	166/1831	0.215627	0.999326	0.999326	WWTR1/INSIG1/IGSF1/SIRT3/BDNF/FMR1/HTT/IRF4/SLC24A1/WTIP/WWP2/ZNF451/ERRFI1/STAU2/HGF/DYRK2/ABCA7/METTL3/SNX25/SEC14L1/TLR4/SLC6A1/BCL2/SH3BP4/SPRED1/HEY2/KBTBD7/WWOX/PTPN1/FGF10/GRK3/STAT1/THY1/PTPRE/TMEM127/WWC1/RNF152/UBE3A/ASXL1/ADRA2A/SMPDL3B/GPD1L/RGS6/RFX8/HEYL/CBLB/EPN2/SLC24A4/WNK2/ING1/RAB11FIP3/RGS17/SH3RF2/RIPOR2/SOD2/ERBIN/VRK3/RAB11FIP1/SIRT1/EPM2A/SH3RF1/TANK/BEND6/FZD1/PTPN18/SIN3…	93
GO:0023057	negative regulation of signaling	93/967	166/1831	0.215627	0.999326	0.999326	WWTR1/INSIG1/IGSF1/SIRT3/BDNF/FMR1/HTT/IRF4/SLC24A1/WTIP/WWP2/ZNF451/ERRFI1/STAU2/HGF/DYRK2/ABCA7/METTL3/SNX25/SEC14L1/TLR4/SLC6A1/BCL2/SH3BP4/SPRED1/HEY2/KBTBD7/WWOX/PTPN1/FGF10/GRK3/STAT1/THY1/PTPRE/TMEM127/WWC1/RNF152/UBE3A/ASXL1/ADRA2A/SMPDL3B/GPD1L/RGS6/RFX8/HEYL/CBLB/EPN2/SLC24A4/WNK2/ING1/RAB11FIP3/RGS17/SH3RF2/RIPOR2/SOD2/ERBIN/VRK3/RAB11FIP1/SIRT1/EPM2A/SH3RF1/TANK/BEND6/FZD1/PTPN18/SIN3…	93
GO:1901698	response to nitrogen compound	74/967	131/1831	0.216786	0.999326	0.999326	INSIG1/NT5E/SORBS1/HRH1/GLDC/ERLEC1/GAB1/RPTOR/NPM1/TLR4/YOD1/BRAF/CPT1A/SOS1/SLC6A1/FAM8A1/UGGT1/BCL2/SYK/ARID1B/SH3BP4/TIAM1/CANX/ACTN2/PTPN1/ABCC9/STAT1/PTPRE/AQP9/UBE2J1/DNAJB12/ATP4B/USP13/UGGT2/SLC24A4/RGS17/SLC1A2/GCNT1/ERBIN/MMP13/CAPN10/MAVS/PRKD1/TOP2B/STXBP4/MEAK7/THBD/ST8SIA2/MAP3K7/RAPGEF3/TMEM67/SIRT1/SIN3A/PNPT1/GRB14/DNAJC10/HDAC6/RNLS/STAT4/SRSF4/UBR1/ITGB2/SNX6/TRIM13/SOCS2/GNAZ…	74
GO:0006351	DNA-templated transcription	232/967	425/1831	0.217383	0.999326	0.999326	WWTR1/IGSF1/SRA1/MXD4/ZNF195/IRF4/G3BP2/CAMTA1/PTOV1/ZNF19/WTIP/RNF2/WWP2/ZNF451/ZNF264/TCF4/SP3/SLC38A3/TTC21B/HGF/TP53BP1/PKNOX1/RPTOR/ZNF526/ZNF391/RAP2C/RAX/E2F5/KMT2A/GTF3C3/PTPRK/NPM1/WDR43/ZNF286A/ZNF236/TESMIN/YWHAQ/GMEB2/STK16/ZNF362/NFE2L1/TLR4/ZNF493/UBTF/ZNF793/INTS7/SOS1/ZNF546/HOXD3/ZNF383/SYK/ING5/CBX6/FOXL2/ARID1B/L3MBTL4/ZNF516/TCEA3/ADORA3/BHLHE40/ZNF41/ZNF208/STOX2/KHDRBS1/ACTN…	232
GO:0002443	leukocyte mediated immunity	19/967	31/1831	0.220672	0.999326	0.999326	CTSC/TP53BP1/TLR4/SYK/SHLD2/NECTIN2/IGHG3/IRAK4/C4B/WDR1/ACE/STX7/NCR3/MAVS/MAP3K7/HFE/ITGB2/STAT5B/MSH6	19
GO:0043087	regulation of GTPase activity	19/967	31/1831	0.220672	0.999326	0.999326	SOS1/SH3BP4/TIAM1/THY1/SNX18/RGS6/EPHA5/RIPOR2/GARNL3/RAPGEF3/GPR65/PKP4/ARHGAP27/AGAP1/AGAP4/SRGAP2/TBC1D9B/ARFGEF1/NET1	19
GO:0045765	regulation of angiogenesis	19/967	31/1831	0.220672	0.999326	0.999326	CCBE1/GAB1/SEMA5A/VASH1/SPRED1/STAT1/AGO1/EPN2/PRKD1/RAPGEF3/SIRT1/STIM1/HMGA2/ADGRB3/HTATIP2/SULF1/MECP2/APLNR/ATP2B4	19
GO:1901342	regulation of vasculature development	19/967	31/1831	0.220672	0.999326	0.999326	CCBE1/GAB1/SEMA5A/VASH1/SPRED1/STAT1/AGO1/EPN2/PRKD1/RAPGEF3/SIRT1/STIM1/HMGA2/ADGRB3/HTATIP2/SULF1/MECP2/APLNR/ATP2B4	19
GO:0002224	toll-like receptor signaling pathway	7/967	10/1831	0.221243	0.999326	0.999326	IRF4/TLR4/IRAK4/SMPDL3B/MAP3K7/GFI1/IKBKB	7
GO:0002287	alpha-beta T cell activation involved in immune response	7/967	10/1831	0.221243	0.999326	0.999326	IRF4/SHB/KMT2A/TNFSF18/ZFPM1/STAT4/RC3H2	7
GO:0002292	T cell differentiation involved in immune response	7/967	10/1831	0.221243	0.999326	0.999326	IRF4/SHB/KMT2A/TNFSF18/ZFPM1/STAT4/RC3H2	7
GO:0002293	alpha-beta T cell differentiation involved in immune response	7/967	10/1831	0.221243	0.999326	0.999326	IRF4/SHB/KMT2A/TNFSF18/ZFPM1/STAT4/RC3H2	7
GO:0002294	CD4-positive, alpha-beta T cell differentiation involved in immune response	7/967	10/1831	0.221243	0.999326	0.999326	IRF4/SHB/KMT2A/TNFSF18/ZFPM1/STAT4/RC3H2	7
GO:0002720	positive regulation of cytokine production involved in immune response	7/967	10/1831	0.221243	0.999326	0.999326	HK1/TLR4/SYK/MAVS/MAP3K7/SIRT1/GPRC5B	7
GO:0006576	biogenic amine metabolic process	7/967	10/1831	0.221243	0.999326	0.999326	IDO1/IDO2/GCDH/SLC29A4/ITGB2/SULT1A1/MECP2	7
GO:0018958	phenol-containing compound metabolic process	7/967	10/1831	0.221243	0.999326	0.999326	BCL2/TPH1/ZEB2/ITGB2/SULT1A1/SLC45A2/DUOXA1	7
GO:0032835	glomerulus development	7/967	10/1831	0.221243	0.999326	0.999326	WWTR1/BCL2/ASXL1/HEYL/COL4A4/SULF1/ANGPT1	7
GO:0034620	cellular response to unfolded protein	7/967	10/1831	0.221243	0.999326	0.999326	ERLEC1/ABCA7/YOD1/PTPN1/EIF2AK2/DNAJC10/TM7SF3	7
GO:0042093	T-helper cell differentiation	7/967	10/1831	0.221243	0.999326	0.999326	IRF4/SHB/KMT2A/TNFSF18/ZFPM1/STAT4/RC3H2	7
GO:0043242	negative regulation of protein-containing complex disassembly	7/967	10/1831	0.221243	0.999326	0.999326	TTBK2/MID1/EPS8/HDAC6/TRIM54/LMOD1/ATXN7	7
GO:0048675	axon extension	7/967	10/1831	0.221243	0.999326	0.999326	SEMA5A/USP9X/SIN3A/CDKL3/HDAC6/ZFYVE27/SPG11	7
GO:0090288	negative regulation of cellular response to growth factor stimulus	7/967	10/1831	0.221243	0.999326	0.999326	PTPN1/EPN2/FZD1/SULF1/ATP2B4/PPM1A/SMURF2	7
GO:1901657	glycosyl compound metabolic process	7/967	10/1831	0.221243	0.999326	0.999326	NT5E/APOBEC3D/APOBEC3F/ACP3/DPYD/DHFR2/ENPP4	7
GO:1901880	negative regulation of protein depolymerization	7/967	10/1831	0.221243	0.999326	0.999326	TTBK2/MID1/EPS8/HDAC6/TRIM54/LMOD1/ATXN7	7
GO:0065003	protein-containing complex assembly	88/967	157/1831	0.221905	0.999326	0.999326	G3BP2/TCF4/ACSL3/TP53BP1/ABCA7/ARHGAP6/RICTOR/KMT2A/NPM1/FCHSD1/TLR4/UBTF/SPAST/EPS8/TBCD/SYK/MPP7/VAMP4/DNAJB14/TIAM1/FCHO2/KCNQ3/SPIRE1/HEY2/CAND1/THRA/HGSNAT/BECN1/EIF2AK2/WDR77/H3C6/USP50/AGO1/DNAJB12/VPS41/ARPC5L/STXBP5/GRWD1/SLC1A2/SOD2/MAVS/PRKD1/FMN1/KCNA1/SETX/AGO4/PNPT1/MDM4/TRPM6/TNFSF18/SF3A1/CCDC65/HDAC6/MITF/SHQ1/HFE/LMOD1/JCHAIN/FARSB/SF3A2/TAF3/ALDH1A3/KAT6B/CARD8/YTHDC1/H2BC6/ARH…	88
GO:0051668	localization within membrane	45/967	78/1831	0.22207	0.999326	0.999326	SYS1/NECTIN3/MFF/SORBS1/VTI1A/ACSL3/TOMM22/GORASP2/BRAF/TTC7A/VAMP4/TIAM1/GLRB/FCHO2/ACTN2/TCAF1/ZDHHC2/THY1/ZDHHC11/MAP7/ATP2C1/STX7/SNX7/EXOC2/RAB11FIP3/ARFRP1/TM9SF3/MIEF1/EPB41L3/ITGA3/ITGB2/MESD/EFR3A/GOLGA7B/CCDC93/SYNE3/NETO1/MUSK/ZFYVE27/ATP2B4/LIN7A/TOMM5/IKBKB/SPG11/AP4M1	45
GO:0044087	regulation of cellular component biogenesis	63/967	111/1831	0.223677	0.999326	0.999326	SIRT3/BDNF/FMR1/HTT/G3BP2/CAPRIN1/STAU2/ARHGAP6/RICTOR/NPM1/FCHSD1/TLR4/EPS8/BRAF/TBCD/SYK/MPP7/GPSM2/SETDB2/CAND1/ALMS1/THRA/THY1/SNX18/BECN1/EIF2AK2/ACE/USP50/RHPN2/VPS41/ARPC5L/SNX7/STXBP5/STX18/PLD1/RAB11FIP3/RIPOR2/MAVS/PRKD1/MYO10/FMN1/ST8SIA2/RAPGEF3/FZD1/TNFSF18/PLEKHM1/GPR65/HDAC6/ADGRB3/SHQ1/LMOD1/CARD8/ARHGAP40/AKAP9/MECP2/MDM1/MUSK/NECTIN1/APLNR/ARFGEF1/PTPRA/MYO3B/IKBKB	63
GO:0001558	regulation of cell growth	24/967	40/1831	0.224038	0.999326	0.999326	BDNF/RPTOR/SEMA5A/RICTOR/NPM1/BCL2/ING5/SH3BP4/IP6K2/EXTL3/ING1/SIN3A/CDKL3/HDAC6/FSTL4/SOCS2/NCBP1/RBBP7/MECP2/RGS2/FRZB/ZFYVE27/IST1/NET1	24
GO:0042886	amide transport	24/967	40/1831	0.224038	0.999326	0.999326	SIRT3/VIP/SLC38A3/SLC9B2/CPT1A/TIAM1/AQP9/CD209/ADRA2A/SLC19A1/RFX3/EPHA5/SLC1A2/CAPN10/TFAP2B/PRKD1/STXBP4/TM7SF3/HFE/DOC2B/SLC25A13/ABCB9/GNAZ/SLC25A32	24
GO:0030030	cell projection organization	109/967	196/1831	0.22526	0.999326	0.999326	WWTR1/TTBK2/BDNF/FMR1/HTT/CAPRIN1/WTIP/TBC1D24/STAU2/TTC21B/WNT7B/SEMA5A/E2F5/YTHDF1/ATP1B2/SPAST/EPS8/BRAF/SOS1/ENAH/BCL2/BBOF1/CC2D2B/ABCC4/ADARB1/ARPIN/TIAM1/SNX1/ACTN2/WDR35/NECTIN2/KIF3A/TMEM107/THY1/IFT22/PTPDC1/CUL4B/KALRN/BICDL1/USP9X/RPGR/WHRN/FMNL3/NCS1/PLD1/NEXN/RFX3/EPHA5/EFHC2/GORAB/RAB11FIP3/RIPOR2/TMEM108/RABL2B/UHMK1/FOXB1/PRKD1/TOP2B/MYO10/KCNA1/ST8SIA2/TMEM67/JHY/ZDHHC17/FZD1/LR…	109
GO:0007565	female pregnancy	15/967	24/1831	0.227174	0.999326	0.999326	SP3/SLC38A3/BCL2/STOX2/IDO1/ACE/ADRA2A/SLC19A1/PTHLH/THBD/ITGA3/HFE/RGS2/STAT5B/SMURF2	15
GO:0043547	positive regulation of GTPase activity	15/967	24/1831	0.227174	0.999326	0.999326	SOS1/TIAM1/THY1/SNX18/RGS6/GARNL3/RAPGEF3/GPR65/PKP4/ARHGAP27/AGAP1/AGAP4/SRGAP2/TBC1D9B/NET1	15
GO:0050953	sensory perception of light stimulus	15/967	24/1831	0.227174	0.999326	0.999326	SLC24A1/RAX/GJC1/GLRB/GPR179/IRX5/RPGR/WHRN/GABRR2/POU6F2/CABP4/RRH/ATXN7/SLC45A2/MYO3B	15
GO:1901605	alpha-amino acid metabolic process	15/967	24/1831	0.227174	0.999326	0.999326	GLDC/ALDH4A1/FTCD/FPGS/IDO1/ALDH5A1/DHFR2/BHMT2/IDO2/GCDH/ARG2/SLC25A13/SLC45A2/MECP2/ATP2B4	15
GO:0007266	Rho protein signal transduction	11/967	17/1831	0.230019	0.999326	0.999326	ARHGAP6/GNA12/EPS8/ADRA2A/RIPOR2/ITGA3/GPR65/STARD13/ABRA/NET1/KCTD13	11
GO:0043433	negative regulation of DNA-binding transcription factor activity	11/967	17/1831	0.230019	0.999326	0.999326	G3BP2/RNF2/WWP2/ADORA3/BHLHE40/HEYL/ERBIN/SIRT1/TAF3/CARD8/GFI1	11
GO:0046632	alpha-beta T cell differentiation	11/967	17/1831	0.230019	0.999326	0.999326	IRF4/SHB/KMT2A/BRAF/BCL2/SYK/SH3RF1/TNFSF18/ZFPM1/STAT4/RC3H2	11
GO:0061572	actin filament bundle organization	11/967	17/1831	0.230019	0.999326	0.999326	SORBS1/ARHGAP6/EPS8/BRAF/SPIRE1/ALMS1/RHPN2/ZEB2/RAPGEF3/GPR65/KCTD13	11
GO:0072331	signal transduction by p53 class mediator	11/967	17/1831	0.230019	0.999326	0.999326	DYRK2/NPM1/MAP2K6/EEF1E1/BCL2/SPRED1/WWOX/SIRT1/TIFAB/MDM4/URB2	11
GO:0051604	protein maturation	30/967	51/1831	0.233273	0.999326	0.999326	DNAJC21/CCBE1/NAA30/PSEN2/TBCD/UGGT1/DNAJB14/CANX/LTO1/LIPT2/ACE/FKBP5/DNAJB12/ERO1B/KLK13/SPG7/METAP2/THBD/DNAJC5/DNAJC10/MMP16/CARD8/MESD/CAST/ISCA1/PDIA4/TLL1/IKBKB/FUT10/VBP1	30
GO:0002833	positive regulation of response to biotic stimulus	20/967	33/1831	0.233732	0.999326	0.999326	IRF4/SEC14L1/MAP2K6/TLR4/SYK/NECTIN2/IRAK4/EIF2AK2/SMPDL3B/USP50/NCR3/ERBIN/MAVS/PRKD1/MAP3K7/SIN3A/CARD8/STAT5B/GFI1/IKBKB	20
GO:0050878	regulation of body fluid levels	20/967	33/1831	0.233732	0.999326	0.999326	VIP/TFPI2/GNA12/TLR4/SYK/FGF10/TPH1/ADRA2A/DGKE/F5/FOXB1/THBD/TIFAB/HPS5/ENPP4/MMRN1/SOCS2/STAT5A/APLNR/STAT5B	20
GO:0007167	enzyme-linked receptor protein signaling pathway	65/967	115/1831	0.234049	0.999326	0.999326	WWTR1/IGSF1/BDNF/CCBE1/SORBS1/ZNF451/ERRFI1/HGF/GAB1/PTPRK/SNX25/BRAF/SOS1/SYK/TIAM1/SPRED1/PTPN1/FGF10/PTPRE/KALRN/USP9X/KIF16B/SHCBP1/ZEB2/CBLB/EPN2/EPHA5/ING1/TMEM108/ERBIN/TFAP2B/PRKD1/STXBP4/MAP3K7/SIRT1/ZDHHC17/FZD1/PTPN18/SETX/SIN3A/GPRC5A/GRB14/ITGA3/HFE/SNX6/FGF9/TIPARP/SINHCAF/FSTL4/SOCS2/RBBP7/SULF1/AKAP3/FGFBP3/LIFR/ANGPT1/STAT5A/IDE/MUSK/ZFYVE27/STAT5B/CASS4/PTPRA/PPM1A/SMURF2	65
GO:0009968	negative regulation of signal transduction	85/967	152/1831	0.236991	0.999326	0.999326	WWTR1/INSIG1/IGSF1/SIRT3/BDNF/HTT/IRF4/WTIP/WWP2/ZNF451/ERRFI1/HGF/DYRK2/ABCA7/METTL3/SNX25/SEC14L1/TLR4/BCL2/SH3BP4/SPRED1/HEY2/KBTBD7/WWOX/PTPN1/FGF10/GRK3/STAT1/THY1/PTPRE/TMEM127/WWC1/RNF152/UBE3A/ASXL1/SMPDL3B/GPD1L/RGS6/RFX8/HEYL/CBLB/EPN2/SLC24A4/WNK2/ING1/RGS17/SH3RF2/RIPOR2/SOD2/ERBIN/VRK3/SIRT1/EPM2A/SH3RF1/TANK/BEND6/FZD1/PTPN18/SIN3A/GPRC5A/GRB14/ITGA3/CAAP1/STRADB/RGS5/RGS20/UBR1/SNX…	85
GO:0010243	response to organonitrogen compound	72/967	128/1831	0.237294	0.999326	0.999326	INSIG1/NT5E/SORBS1/HRH1/GLDC/ERLEC1/GAB1/RPTOR/TLR4/YOD1/BRAF/CPT1A/SOS1/SLC6A1/FAM8A1/UGGT1/BCL2/SYK/ARID1B/SH3BP4/TIAM1/CANX/ACTN2/PTPN1/ABCC9/STAT1/PTPRE/AQP9/UBE2J1/DNAJB12/ATP4B/USP13/UGGT2/SLC24A4/RGS17/SLC1A2/GCNT1/ERBIN/MMP13/CAPN10/PRKD1/TOP2B/STXBP4/MEAK7/THBD/ST8SIA2/MAP3K7/RAPGEF3/TMEM67/SIRT1/SIN3A/PNPT1/GRB14/DNAJC10/HDAC6/RNLS/STAT4/SRSF4/UBR1/ITGB2/SNX6/TRIM13/SOCS2/GNAZ/AKAP9/MEC…	72
GO:0034220	monoatomic ion transmembrane transport	72/967	128/1831	0.237294	0.999326	0.999326	FMR1/HTT/SLC24A1/WWP2/SLC9A7/SLC25A37/PSEN2/KCNAB2/ATP8B2/YWHAQ/SLC9B2/ATP1B2/SLC6A1/GJC1/ANO5/BCL2/ABCC4/GLRB/KCNQ3/ACTN2/XCR1/JPH2/ATP6V1B2/TCAF1/ABCC9/THY1/GABRA2/ADRA2A/ATP2C1/SFXN5/GPD1L/ATP4B/NCS1/SLC19A1/SLC24A4/WNK2/SLC6A6/SLC1A2/GABRR2/PRKD1/SHROOM2/KCNA1/KCNJ13/SLC5A2/SLC6A13/TRPM6/SFXN2/CABP4/STIM1/SLC29A4/CCR5/SLC4A7/HFE/GRIN3A/KCNQ5/MCOLN2/SLC25A13/SLC11A1/ATP2A2/KCNN3/KCNT2/AKAP9/NE…	72
GO:0023051	regulation of signaling	218/967	400/1831	0.239574	0.999326	0.999326	WWTR1/INSIG1/CTSC/IGSF1/SIRT3/BDNF/FMR1/HTT/MID1/IRF4/SLC24A1/CAMTA1/IFNAR2/WTIP/TBC1D24/CCBE1/SORBS1/WWP2/ZNF451/ERRFI1/HRH1/STAU2/TTC21B/HGF/WNT7B/DYRK2/ABCA7/RPTOR/ARHGAP6/SEMA5A/RICTOR/METTL3/KMT2A/ACP3/GNA12/SNX25/NPM1/SEC14L1/TMEM9B/YTHDF1/SLC9B2/MAP2K6/TLR4/EEF1E1/EPS8/BRAF/CPT1A/SOS1/SLC6A1/BCL2/SYK/ING5/FOXL2/SH3BP4/TIAM1/ADORA3/KCNQ3/EXTL3/NBR1/SPRED1/HEY2/KBTBD7/KDM4C/NECTIN2/WWOX/PTPN…	218
GO:0071495	cellular response to endogenous stimulus	86/967	154/1831	0.241258	0.999326	0.999326	INSIG1/SRA1/BDNF/CCBE1/SORBS1/ZNF451/HRH1/HGF/GAB1/RPTOR/KMT2A/PTPRK/SNX25/STK16/TLR4/BRAF/SOS1/ARID1B/SH3BP4/ACTN2/SPRED1/KDM4C/DYNC1LI2/WWOX/PTPN1/FGF10/THRA/STAT1/PTPRE/AQP9/BECN1/USP9X/UBE3A/ACE/ADRA2A/KIF16B/SHCBP1/HEYL/ZEB2/UFSP2/EPN2/ING1/SLC1A2/TMEM108/CAPN10/TFAP2B/PRKD1/TOP2B/STXBP4/APAF1/MAP3K7/RAPGEF3/SIRT1/ZDHHC17/FZD1/SETX/SIN3A/GRB14/TRERF1/ITGA3/PTGFR/HDAC6/SLC4A7/HFE/UBR1/SNX6/FG…	86
GO:0006518	peptide metabolic process	48/967	84/1831	0.241747	0.999326	0.999326	MRPL44/FMR1/YARS1/GATB/CAPRIN1/WTIP/EIF4E3/PSEN2/ABCA7/LRPPRC/METTL3/NPM1/MRPL23/YTHDF1/EEF1E1/BZW2/GSAP/LTO1/KHDRBS1/FTSJ1/MRPL2/BECN1/EIF2AK2/ACE/BACE1-AS/AGO1/ERO1B/PTCD3/PLD1/IFNGR1/SLC1A2/UHMK1/MRPS35/MTG2/AGO4/PNPT1/POLDIP3/NIBAN1/FARSB/RC3H2/TNRC6B/MRPS16/ABCB9/MRPL42/NCBP1/RGS2/IDE/NCBP2	48
GO:0051130	positive regulation of cellular component organization	73/967	130/1831	0.242075	0.999326	0.999326	MFF/LMAN2/BDNF/FMR1/HTT/G3BP2/CAPRIN1/TBC1D24/RAD50/STAU2/ABCA7/SEMA5A/RICTOR/FCHSD1/TLR4/ATP1B2/SPAST/EPS8/BRAF/SYK/MPP7/SMC4/TIAM1/GPSM2/ACTN2/SPIRE1/SETDB2/CAND1/ZDHHC2/THY1/SNX18/C4B/BECN1/WDR1/USP50/SNX7/STX18/RIPOR2/MAVS/PRKD1/FMN1/ST8SIA2/RAPGEF3/FZD1/SETX/MIEF1/CDKL3/PLEKHM1/ITGA3/GPR65/WHAMM/HDAC6/ADGRB3/HFE/LMOD1/SURF4/SF3A2/DOC2B/SLC11A1/PPARGC1A/CAMK2B/CBFA2T2/AKAP9/ANGPT1/MECP2/RGS2/…	73
GO:0034248	regulation of amide metabolic process	31/967	53/1831	0.24233	0.999326	0.999326	SIRT3/FMR1/CAPRIN1/WTIP/EIF4E3/ABCA7/RPTOR/LRPPRC/METTL3/NPM1/YTHDF1/BZW2/GSAP/KHDRBS1/EIF2AK2/BACE1-AS/AGO1/PTCD3/PLD1/IFNGR1/UHMK1/MTG2/AGO4/PNPT1/POLDIP3/NIBAN1/RC3H2/TNRC6B/NCBP1/RGS2/NCBP2	31
GO:0034765	regulation of monoatomic ion transmembrane transport	31/967	53/1831	0.24233	0.999326	0.999326	FMR1/HTT/WWP2/PSEN2/KCNAB2/YWHAQ/ATP1B2/BCL2/KCNQ3/ACTN2/JPH2/TCAF1/THY1/ADRA2A/GPD1L/WNK2/PRKD1/KCNA1/KCNJ13/CABP4/STIM1/KCNQ5/AKAP9/NETO1/ISCU/UBR3/KCNC4/APLNR/ATP2B4/STIMATE/KCNJ5	31
GO:0002790	peptide secretion	16/967	26/1831	0.242999	0.999326	0.999326	SIRT3/VIP/SLC9B2/CPT1A/TIAM1/ADRA2A/RFX3/EPHA5/CAPN10/TFAP2B/PRKD1/STXBP4/TM7SF3/HFE/DOC2B/GNAZ	16
GO:0030072	peptide hormone secretion	16/967	26/1831	0.242999	0.999326	0.999326	SIRT3/VIP/SLC9B2/CPT1A/TIAM1/ADRA2A/RFX3/EPHA5/CAPN10/TFAP2B/PRKD1/STXBP4/TM7SF3/HFE/DOC2B/GNAZ	16
GO:0050769	positive regulation of neurogenesis	16/967	26/1831	0.242999	0.999326	0.999326	BDNF/CAPRIN1/TBC1D24/STAU2/SEMA5A/BRAF/TIAM1/ETV5/ACE/CDKL3/HDAC6/CAMK2B/MECP2/ZFYVE27/IST1/SS18L1	16
GO:0033674	positive regulation of kinase activity	21/967	35/1831	0.246191	0.999326	0.999326	RAD50/RPTOR/TLR4/PTPN1/NEK10/ACE/ADRA2A/PRKD1/MAP3K7/SIRT1/CACUL1/HMGA2/STRADB/SLC11A1/ANGPT1/MARK2/MUSK/CASS4/BORA/ATP2B4/GPRC5B	21
GO:0031329	regulation of cellular catabolic process	43/967	75/1831	0.247862	0.999326	0.999326	FMR1/HTT/VIP/CAPRIN1/HGF/EXOC7/ETFBKMT/RPTOR/LRPPRC/METTL3/NPM1/YTHDF1/CPT1A/BCL2/SH3BP4/GRSF1/ATP6V1B2/PTPN1/SNX18/BECN1/RNF152/ADRA2A/THRAP3/SNX7/USP13/PRKD1/APAF1/MAP3K7/SIRT1/EPM2A/PNPT1/HDAC6/SPTLC1/SNX6/RC3H2/TNRC6B/PRXL2C/SLC11A1/TRIM13/DNM1L/ATP2B4/FASTKD1/MLYCD	43
GO:0008645	hexose transmembrane transport	12/967	19/1831	0.250525	0.999326	0.999326	SORBS1/BRAF/ACE/SLC1A2/CAPN10/STXBP4/SLC5A2/ASPSCR1/MFSD4A/SLC2A11/SLC45A2/SLC2A12	12
GO:0010212	response to ionizing radiation	12/967	19/1831	0.250525	0.999326	0.999326	TP53BP1/INTS7/BCL2/TOPBP1/SOD2/THBD/SIRT1/TANK/NHEJ1/MECP2/IKBIP/NET1	12
GO:0015749	monosaccharide transmembrane transport	12/967	19/1831	0.250525	0.999326	0.999326	SORBS1/BRAF/ACE/SLC1A2/CAPN10/STXBP4/SLC5A2/ASPSCR1/MFSD4A/SLC2A11/SLC45A2/SLC2A12	12
GO:0030832	regulation of actin filament length	12/967	19/1831	0.250525	0.999326	0.999326	SEMA5A/RICTOR/FCHSD1/EPS8/ACTN2/WDR1/ARPC5L/FMN1/LMOD1/ARHGAP40/ARFGEF1/MYO3B	12
GO:0043488	regulation of mRNA stability	12/967	19/1831	0.250525	0.999326	0.999326	FMR1/VIP/CAPRIN1/METTL3/NPM1/YTHDF1/THRAP3/PNPT1/RC3H2/TNRC6B/SLC11A1/FASTKD1	12
GO:0051606	detection of stimulus	12/967	19/1831	0.250525	0.999326	0.999326	TLR4/EXTL3/TMEM107/C4B/WHRN/SLC24A4/SOD2/KCNA1/CABP4/STIM1/RRH/DRGX	12
GO:0051252	regulation of RNA metabolic process	247/967	455/1831	0.250926	0.999326	0.999326	WWTR1/IGSF1/RBM25/SRA1/FMR1/MXD4/ZNF195/IRF4/G3BP2/VIP/CAMTA1/PTOV1/ZNF19/CAPRIN1/WTIP/RNF2/WWP2/ZNF451/ZNF264/APOBEC3D/TCF4/SP3/SLC38A3/TTC21B/HGF/TP53BP1/PKNOX1/RPTOR/APOBEC3F/ZNF526/ZNF391/RAP2C/LRPPRC/METTL3/RAX/E2F5/KMT2A/AFF2/PTPRK/NPM1/WDR43/ZNF286A/YTHDF1/ZNF236/TESMIN/YWHAQ/GMEB2/STK16/ZNF362/NFE2L1/TLR4/ZNF493/UBTF/ZNF793/INTS7/SOS1/ZNF546/HOXD3/ZNF383/SYK/ING5/CBX6/FOXL2/ARID1B/L3MBTL4…	247
GO:0002252	immune effector process	32/967	55/1831	0.251152	0.999326	0.999326	CTSC/IRF4/HK1/SHB/TP53BP1/KMT2A/TLR4/SYK/SHLD2/NECTIN2/IGHG3/IRAK4/C4B/WDR1/ACE/UBE2J1/STX7/NCR3/MAVS/MAP3K7/SIRT1/TNFSF18/ZFPM1/STAT4/HFE/ITGB2/RC3H2/SLC11A1/ANGPT1/STAT5B/GPRC5B/MSH6	32
GO:0007409	axonogenesis	32/967	55/1831	0.251152	0.999326	0.999326	BDNF/SEMA5A/YTHDF1/SPAST/BRAF/SOS1/ENAH/BCL2/ADARB1/TIAM1/THY1/KALRN/USP9X/NEXN/EPHA5/FOXB1/TOP2B/ZDHHC17/SIN3A/CDKL3/HDAC6/DRGX/B4GALT5/FSTL4/MARK2/ZFYVE27/IST1/NECTIN1/NCAM1/UST/ETV1/SPG11	32
GO:1903829	positive regulation of protein localization	32/967	55/1831	0.251152	0.999326	0.999326	WWTR1/MFF/SIRT3/SORBS1/ACSL3/ABCA7/NPM1/TLR4/GPSM2/TCAF1/ZDHHC2/PINX1/IPO7/ATP2C1/GPD1L/CAPN10/MAVS/PRKD1/MEAK7/RAPGEF3/HUWE1/MIEF1/TM7SF3/ITGA3/ZFAND1/ITGB2/DOC2B/MESD/SYT11/DNM1L/ATP2B4/PPM1A	32
GO:0000018	regulation of DNA recombination	8/967	12/1831	0.252003	0.999326	0.999326	RAD50/TP53BP1/SMARCAD1/SHLD2/SMCHD1/WDR48/TRRAP/MSH6	8
GO:0001837	epithelial to mesenchymal transition	8/967	12/1831	0.252003	0.999326	0.999326	WWTR1/HGF/TIAM1/SPRED1/HEY2/HEYL/HMGA2/NCAM1	8
GO:0002286	T cell activation involved in immune response	8/967	12/1831	0.252003	0.999326	0.999326	IRF4/SHB/KMT2A/TNFSF18/ZFPM1/STAT4/RC3H2/SLC11A1	8
GO:0007189	adenylate cyclase-activating G protein-coupled receptor signaling pathway	8/967	12/1831	0.252003	0.999326	0.999326	VIP/ADRA2A/PTHLH/ADGRG5/GPR65/PTGFR/ADGRB3/ATP2B4	8
GO:0008543	fibroblast growth factor receptor signaling pathway	8/967	12/1831	0.252003	0.999326	0.999326	SOS1/FGF10/KIF16B/SHCBP1/SETX/FGF9/SULF1/FGFBP3	8
GO:0010770	positive regulation of cell morphogenesis	8/967	12/1831	0.252003	0.999326	0.999326	CAPRIN1/TBC1D24/STAU2/TIAM1/CDKL3/HDAC6/CAMK2B/SS18L1	8
GO:0043648	dicarboxylic acid metabolic process	8/967	12/1831	0.252003	0.999326	0.999326	ALDH4A1/FTCD/FPGS/ALDH5A1/DHFR2/SLC19A1/SLC25A32/ME2	8
GO:0044344	cellular response to fibroblast growth factor stimulus	8/967	12/1831	0.252003	0.999326	0.999326	SOS1/FGF10/KIF16B/SHCBP1/SETX/FGF9/SULF1/FGFBP3	8
GO:0048488	synaptic vesicle endocytosis	8/967	12/1831	0.252003	0.999326	0.999326	TBC1D24/AP3B2/VAMP4/CANX/FCHO2/AP3M2/AMPH/SYT11	8
GO:0050775	positive regulation of dendrite morphogenesis	8/967	12/1831	0.252003	0.999326	0.999326	CAPRIN1/TBC1D24/STAU2/TIAM1/CDKL3/HDAC6/CAMK2B/SS18L1	8
GO:0071774	response to fibroblast growth factor	8/967	12/1831	0.252003	0.999326	0.999326	SOS1/FGF10/KIF16B/SHCBP1/SETX/FGF9/SULF1/FGFBP3	8
GO:0072337	modified amino acid transport	8/967	12/1831	0.252003	0.999326	0.999326	SLC7A6/SLC22A5/SLC19A1/SLC6A13/SLC16A9/SLC25A13/SLC11A1/SLC25A32	8
GO:0140238	presynaptic endocytosis	8/967	12/1831	0.252003	0.999326	0.999326	TBC1D24/AP3B2/VAMP4/CANX/FCHO2/AP3M2/AMPH/SYT11	8
GO:0006412	translation	38/967	66/1831	0.25391	0.999326	0.999326	MRPL44/FMR1/YARS1/GATB/CAPRIN1/WTIP/EIF4E3/LRPPRC/METTL3/NPM1/MRPL23/YTHDF1/EEF1E1/BZW2/LTO1/KHDRBS1/FTSJ1/MRPL2/EIF2AK2/BACE1-AS/AGO1/PTCD3/PLD1/UHMK1/MRPS35/MTG2/AGO4/PNPT1/POLDIP3/NIBAN1/FARSB/RC3H2/TNRC6B/MRPS16/MRPL42/NCBP1/RGS2/NCBP2	38
GO:0072657	protein localization to membrane	38/967	66/1831	0.25391	0.999326	0.999326	SYS1/NECTIN3/MFF/SORBS1/ACSL3/TOMM22/GORASP2/BRAF/TTC7A/TIAM1/GLRB/FCHO2/ACTN2/TCAF1/ZDHHC2/THY1/ZDHHC11/MAP7/ATP2C1/STX7/ARFRP1/TM9SF3/MIEF1/EPB41L3/ITGA3/ITGB2/MESD/EFR3A/GOLGA7B/SYNE3/NETO1/MUSK/ZFYVE27/ATP2B4/LIN7A/TOMM5/IKBKB/AP4M1	38
GO:0019220	regulation of phosphate metabolic process	69/967	123/1831	0.254302	0.999326	0.999326	WWTR1/BDNF/FMR1/HTT/CAMTA1/RAD50/ERRFI1/HRH1/HGF/ACSL3/RPTOR/RAP2C/RICTOR/GNA12/NPM1/MAP2K6/TLR4/BRAF/BCL2/SYK/ADARB1/IP6K2/SPRED1/PTPN1/FGF10/THY1/NEK10/ACE/ADRA2A/IPO7/GPD1L/RBL1/CBLB/MTMR1/PTPRQ/MAVS/PRKD1/MAP3K7/SIRT1/FZD1/SLCO3A1/CACUL1/TNFSF18/GPRC5A/DNAJC10/HDAC6/HMGA2/STRADB/WDFY2/NIBAN1/ITGB2/SNX6/WDR91/FGF9/SLC11A1/PPARGC1A/AKAP9/ANGPT1/RGS2/MARK2/MUSK/ME2/APLNR/DNM1L/CASS4/BORA/ATP2B4/…	69
GO:0051174	regulation of phosphorus metabolic process	69/967	123/1831	0.254302	0.999326	0.999326	WWTR1/BDNF/FMR1/HTT/CAMTA1/RAD50/ERRFI1/HRH1/HGF/ACSL3/RPTOR/RAP2C/RICTOR/GNA12/NPM1/MAP2K6/TLR4/BRAF/BCL2/SYK/ADARB1/IP6K2/SPRED1/PTPN1/FGF10/THY1/NEK10/ACE/ADRA2A/IPO7/GPD1L/RBL1/CBLB/MTMR1/PTPRQ/MAVS/PRKD1/MAP3K7/SIRT1/FZD1/SLCO3A1/CACUL1/TNFSF18/GPRC5A/DNAJC10/HDAC6/HMGA2/STRADB/WDFY2/NIBAN1/ITGB2/SNX6/WDR91/FGF9/SLC11A1/PPARGC1A/AKAP9/ANGPT1/RGS2/MARK2/MUSK/ME2/APLNR/DNM1L/CASS4/BORA/ATP2B4/…	69
GO:0051246	regulation of protein metabolic process	132/967	240/1831	0.255207	0.999326	0.999326	WWTR1/CTSC/BDNF/FMR1/HTT/VIP/CAMTA1/SERPINB8/CAPRIN1/WTIP/TBC1D24/CCBE1/RAD23B/RAD50/ERRFI1/EIF4E3/SLC25A37/HGF/ABCA7/RPTOR/RAP2C/LRPPRC/RICTOR/METTL3/GNA12/NPM1/YTHDF1/MAP2K6/TLR4/BZW2/BRAF/BCL2/SYK/FOXL2/ADARB1/GSAP/IP6K2/TOLLIP/KHDRBS1/SPRED1/PTPN1/FGF10/ZDHHC2/THY1/CUL4B/PINX1/PSME3IP1/USP9X/NEK10/EIF2AK2/UBE3A/ACE/ADRA2A/IPO7/BACE1-AS/USP50/AGO1/GPD1L/USP44/NFYB/PTCD3/PLD1/CBLB/USP13/WDR48/P…	132
GO:0002218	activation of innate immune response	17/967	28/1831	0.257828	0.999326	0.999326	IRF4/SEC14L1/MAP2K6/TLR4/SYK/IRAK4/EIF2AK2/SMPDL3B/USP50/ERBIN/MAVS/PRKD1/MAP3K7/SIN3A/CARD8/GFI1/IKBKB	17
GO:0030217	T cell differentiation	22/967	37/1831	0.258095	0.999326	0.999326	IRF4/SHB/SP3/PKNOX1/METTL3/KMT2A/BRAF/SOS1/BCL2/SYK/ARID1B/USP44/SH3RF1/TNFSF18/TNFRSF9/ZFPM1/STAT4/CAMK4/RC3H2/RABL3/NHEJ1/STAT5B	22
GO:0045088	regulation of innate immune response	22/967	37/1831	0.258095	0.999326	0.999326	IRF4/METTL3/SEC14L1/MAP2K6/TLR4/SYK/NECTIN2/PTPN1/IRAK4/EIF2AK2/SMPDL3B/USP50/NCR3/ERBIN/MAVS/PRKD1/MAP3K7/SIN3A/CARD8/STAT5B/GFI1/IKBKB	22
GO:0051347	positive regulation of transferase activity	22/967	37/1831	0.258095	0.999326	0.999326	RAD50/RPTOR/TLR4/PTPN1/NEK10/ACE/ADRA2A/PRKD1/MAP3K7/SIRT1/CACUL1/HMGA2/STRADB/SLC11A1/ANGPT1/MARK2/ARRDC4/MUSK/CASS4/BORA/ATP2B4/GPRC5B	22
GO:1901653	cellular response to peptide	22/967	37/1831	0.258095	0.999326	0.999326	INSIG1/SORBS1/GAB1/TLR4/SOS1/ARID1B/ACTN2/PTPN1/STAT1/PTPRE/CAPN10/PRKD1/STXBP4/MAP3K7/SIRT1/GRB14/SNX6/SOCS2/STAT5A/IDE/STAT5B/PTPRA	22
GO:0098662	inorganic cation transmembrane transport	57/967	101/1831	0.258966	0.999326	0.999326	FMR1/HTT/SLC24A1/WWP2/SLC9A7/SLC25A37/PSEN2/KCNAB2/SLC9B2/ATP1B2/SLC6A1/BCL2/KCNQ3/ACTN2/XCR1/JPH2/ATP6V1B2/ABCC9/THY1/ADRA2A/ATP2C1/GPD1L/ATP4B/NCS1/SLC24A4/WNK2/SLC6A6/PRKD1/SHROOM2/KCNA1/KCNJ13/SLC5A2/SLC6A13/TRPM6/CABP4/STIM1/CCR5/SLC4A7/HFE/GRIN3A/KCNQ5/MCOLN2/SLC25A13/SLC11A1/ATP2A2/KCNN3/KCNT2/AKAP9/NETO1/ISCU/UBR3/SLC20A1/KCNC4/APLNR/ATP2B4/STIMATE/KCNJ5	57
GO:0034762	regulation of transmembrane transport	39/967	68/1831	0.261475	0.999326	0.999326	FMR1/HTT/SORBS1/WWP2/PSEN2/KCNAB2/YWHAQ/ATP1B2/BRAF/BCL2/KCNQ3/ACTN2/JPH2/TCAF1/THY1/ACE/ADRA2A/GPD1L/WNK2/SLC1A2/CAPN10/PRKD1/STXBP4/KCNA1/KCNJ13/CABP4/STIM1/ASPSCR1/KCNQ5/AKAP9/NETO1/RGS2/ISCU/UBR3/KCNC4/APLNR/ATP2B4/STIMATE/KCNJ5	39
GO:0043043	peptide biosynthetic process	39/967	68/1831	0.261475	0.999326	0.999326	MRPL44/FMR1/YARS1/GATB/CAPRIN1/WTIP/EIF4E3/LRPPRC/METTL3/NPM1/MRPL23/YTHDF1/EEF1E1/BZW2/LTO1/KHDRBS1/FTSJ1/MRPL2/EIF2AK2/BACE1-AS/AGO1/PTCD3/PLD1/SLC1A2/UHMK1/MRPS35/MTG2/AGO4/PNPT1/POLDIP3/NIBAN1/FARSB/RC3H2/TNRC6B/MRPS16/MRPL42/NCBP1/RGS2/NCBP2	39
GO:0098655	monoatomic cation transmembrane transport	58/967	103/1831	0.26463	0.999326	0.999326	FMR1/HTT/SLC24A1/WWP2/SLC9A7/SLC25A37/PSEN2/KCNAB2/SLC9B2/ATP1B2/SLC6A1/BCL2/KCNQ3/ACTN2/XCR1/JPH2/ATP6V1B2/ABCC9/THY1/ADRA2A/ATP2C1/GPD1L/ATP4B/NCS1/SLC24A4/WNK2/SLC6A6/PRKD1/SHROOM2/KCNA1/KCNJ13/SLC5A2/SLC6A13/TRPM6/CABP4/STIM1/SLC29A4/CCR5/SLC4A7/HFE/GRIN3A/KCNQ5/MCOLN2/SLC25A13/SLC11A1/ATP2A2/KCNN3/KCNT2/AKAP9/NETO1/ISCU/UBR3/SLC20A1/KCNC4/APLNR/ATP2B4/STIMATE/KCNJ5	58
GO:0016236	macroautophagy	28/967	48/1831	0.265111	0.999326	0.999326	HTT/VTI1A/EXOC7/SPATA33/RAB33B/YOD1/VPS36/NBR1/ATP6V1B2/SNX18/BECN1/VPS41/SNX7/ATG4C/MAP3K7/SIRT1/EPM2A/HUWE1/VTA1/PLEKHM1/HDAC6/SPTLC1/SNX6/TRIM13/ATP2A2/RETREG1/SPG11/AP4M1	28
GO:0048732	gland development	28/967	48/1831	0.265111	0.999326	0.999326	SP3/HGF/WNT7B/BRAF/CPT1A/HOXD3/BCL2/FPGS/FGF10/THRA/TPH1/FEM1B/WDR77/UBE3A/ASXL1/TFCP2L1/SOD2/FOXB1/PSAPL1/JARID2/PNPT1/HFE/ALDH1A3/SOCS2/SULF1/STAT5A/FRZB/STAT5B	28
GO:0006955	immune response	85/967	153/1831	0.266194	0.999326	0.999326	CTSC/MX2/IRF4/G3BP2/IFNAR2/HK1/APOBEC3D/SHB/TP53BP1/APOBEC3F/TNFRSF13C/METTL3/KMT2A/SEC14L1/MAP2K6/TLR4/BRAF/SOS1/BCL2/SYK/ADARB1/SHLD2/TOLLIP/KHDRBS1/SPIRE1/XCR1/KDM6B/NECTIN2/IDO1/PTPN1/IGHG3/STAT1/IRAK4/THY1/ZDHHC11/C4B/TNFRSF13B/SLC22A5/CD209/EIF2AK2/IPO7/SMPDL3B/USP50/UBE2J1/MAPK10/USP44/STX7/CBLB/IFNGR1/NCR3/ERBIN/MAVS/PRKD1/STXBP4/MAP3K7/RAPGEF3/SIRT1/TANK/SIN3A/TNFSF18/ARG2/ANKHD1/GPR65/A…	85
GO:0061564	axon development	34/967	59/1831	0.268126	0.999326	0.999326	BDNF/TBC1D24/SEMA5A/YTHDF1/SPAST/BRAF/SOS1/ENAH/BCL2/ADARB1/TIAM1/THY1/KALRN/USP9X/NEXN/EPHA5/FOXB1/TOP2B/KCNA1/ZDHHC17/SIN3A/CDKL3/HDAC6/DRGX/B4GALT5/FSTL4/MARK2/ZFYVE27/IST1/NECTIN1/NCAM1/UST/ETV1/SPG11	34
GO:0001764	neuron migration	13/967	21/1831	0.269146	0.999326	0.999326	TBC1D24/USP9X/KIAA0319L/TOP2B/SH3RF1/LRP12/ITGA3/DRGX/NAV1/CAMK2B/FAT3/SRGAP2/MARK2	13
GO:0007411	axon guidance	13/967	21/1831	0.269146	0.999326	0.999326	BDNF/SEMA5A/YTHDF1/SOS1/ENAH/KALRN/NEXN/EPHA5/HDAC6/DRGX/NECTIN1/NCAM1/ETV1	13
GO:0017015	regulation of transforming growth factor beta receptor signaling pathway	13/967	21/1831	0.269146	0.999326	0.999326	ZNF451/SNX25/SPRED1/ZEB2/ING1/SIRT1/SIN3A/ITGA3/SNX6/SINHCAF/RBBP7/PPM1A/SMURF2	13
GO:0031334	positive regulation of protein-containing complex assembly	13/967	21/1831	0.269146	0.999326	0.999326	RICTOR/FCHSD1/TLR4/SYK/MPP7/CAND1/USP50/MAVS/PRKD1/FMN1/LMOD1/AKAP9/MECP2	13
GO:0034250	positive regulation of amide metabolic process	13/967	21/1831	0.269146	0.999326	0.999326	SIRT3/FMR1/METTL3/NPM1/YTHDF1/GSAP/KHDRBS1/BACE1-AS/PLD1/IFNGR1/UHMK1/POLDIP3/NIBAN1	13
GO:0043270	positive regulation of monoatomic ion transport	13/967	21/1831	0.269146	0.999326	0.999326	HTT/ATP1B2/ACTN2/JPH2/TCAF1/THY1/ADRA2A/GPD1L/WNK2/STIM1/AKAP9/APLNR/STIMATE	13
GO:0097485	neuron projection guidance	13/967	21/1831	0.269146	0.999326	0.999326	BDNF/SEMA5A/YTHDF1/SOS1/ENAH/KALRN/NEXN/EPHA5/HDAC6/DRGX/NECTIN1/NCAM1/ETV1	13
GO:1903844	regulation of cellular response to transforming growth factor beta stimulus	13/967	21/1831	0.269146	0.999326	0.999326	ZNF451/SNX25/SPRED1/ZEB2/ING1/SIRT1/SIN3A/ITGA3/SNX6/SINHCAF/RBBP7/PPM1A/SMURF2	13
GO:0009893	positive regulation of metabolic process	223/967	411/1831	0.270947	0.999326	0.999326	WWTR1/CTSC/SRA1/SIRT3/BDNF/FMR1/HTT/IRF4/VIP/CAMTA1/PTOV1/CAPRIN1/HK1/CCBE1/SORBS1/RAD50/WWP2/HRH1/SLC25A37/TCF4/SP3/SLC38A3/TTC21B/HGF/ACSL3/DYRK2/TP53BP1/PKNOX1/RPTOR/RAP2C/RICTOR/METTL3/RAX/E2F5/KMT2A/GNA12/NPM1/WDR43/YTHDF1/GMEB2/STK16/MAP2K6/TLR4/ZNF493/EEF1E1/UBTF/BRAF/CPT1A/HOXD3/BCL2/SYK/FOXL2/ARID1B/SH3BP4/GSAP/ZNF516/SHLD2/IP6K2/TOLLIP/ZNF208/KHDRBS1/ACTN2/GRSF1/SPIRE1/HEY2/KDM6B/KDM4C/…	223
GO:0098739	import across plasma membrane	18/967	30/1831	0.271767	0.999326	0.999326	SLC24A1/SLC9A7/SLC38A3/ATP1B2/SLC6A1/ABCC9/ATP4B/SLC19A1/SLC24A4/SLC6A6/SLC1A2/KCNJ13/SLC5A2/SLC6A13/RGS2/ISCU/ATP2B4/KCNJ5	18
GO:0031399	regulation of protein modification process	80/967	144/1831	0.27463	0.999326	0.999326	WWTR1/BDNF/FMR1/HTT/CAMTA1/TBC1D24/RAD50/ERRFI1/HGF/RPTOR/RAP2C/RICTOR/GNA12/NPM1/MAP2K6/TLR4/BRAF/BCL2/SYK/ADARB1/IP6K2/TOLLIP/SPRED1/PTPN1/FGF10/THY1/PINX1/NEK10/UBE3A/ACE/ADRA2A/IPO7/GPD1L/USP44/NFYB/CBLB/WDR48/PTPRQ/NDFIP2/SH3RF2/POMT1/MAVS/PRKD1/MAP3K7/SIRT1/TANK/FZD1/SLCO3A1/HUWE1/CACUL1/TNFSF18/GPRC5A/DNAJC10/ASPSCR1/HDAC6/HMGA2/STRADB/WDFY2/NIBAN1/ITGB2/SNX6/FGF9/RABL3/SLC11A1/PPARGC1A/SE…	80
GO:0009894	regulation of catabolic process	60/967	107/1831	0.275765	0.999326	0.999326	FMR1/HTT/VIP/CAPRIN1/RAD23B/HGF/EXOC7/ETFBKMT/RPTOR/LRPPRC/METTL3/GNA12/NPM1/YTHDF1/CPT1A/BCL2/SH3BP4/GRSF1/ATP6V1B2/PTPN1/ZDHHC2/THRA/SNX18/CUL4B/BECN1/PSME3IP1/USP9X/RNF152/UBE3A/ADRA2A/THRAP3/SNX7/CBLB/USP13/SH3RF2/PRKD1/APAF1/MAP3K7/SIRT1/EPM2A/SH3RF1/PNPT1/MDM4/HDAC6/SPTLC1/HFE/SNX6/WDR91/RC3H2/TIPARP/TNRC6B/PRXL2C/SLC11A1/TRIM13/IDE/UBR3/DNM1L/ATP2B4/FASTKD1/MLYCD	60
GO:0019438	aromatic compound biosynthetic process	258/967	477/1831	0.27586	0.999326	0.999326	WWTR1/IGSF1/SRA1/FMR1/MXD4/ZNF195/IRF4/G3BP2/CAMTA1/PTOV1/ZNF19/NT5E/WTIP/RNF2/RAD50/WWP2/ZNF451/ZNF264/APOBEC3D/TCF4/SP3/SLC38A3/TTC21B/HGF/ACSL3/TP53BP1/PKNOX1/RPTOR/APOBEC3F/ZNF526/ZNF391/RAP2C/RAX/E2F5/KMT2A/GTF3C3/PTPRK/NPM1/WDR43/ZNF286A/ZNF236/TESMIN/YWHAQ/GMEB2/STK16/ZNF362/NFE2L1/TLR4/ZNF493/UBTF/ZNF793/INTS7/SOS1/ZNF546/HOXD3/ZNF383/SYK/ING5/CBX6/FOXL2/ARID1B/L3MBTL4/FPGS/ZNF516/TCEA3/A…	258
GO:0070201	regulation of establishment of protein localization	41/967	72/1831	0.27615	0.999326	0.999326	INSIG1/MFF/SIRT3/WWP2/ERLEC1/ACSL3/SLC9B2/TLR4/YOD1/CPT1A/TIAM1/PTPN1/TCAF1/ZDHHC2/ADRA2A/ATP2C1/UBE2J1/STXBP5/RFX3/EPHA5/RAB11FIP3/NDFIP2/CAPN10/TFAP2B/MAVS/UHMK1/PRKD1/STXBP4/RAB11FIP1/RAPGEF3/HUWE1/MIEF1/TM7SF3/HDAC6/ZFAND1/ITGB2/DOC2B/GNAZ/ANGPT1/DNM1L/PPM1A	41
GO:0007264	small GTPase mediated signal transduction	35/967	61/1831	0.276297	0.999326	0.999326	G3BP2/ARHGAP6/RAP2C/GNA12/YWHAQ/RAB33B/EPS8/SOS1/TIAM1/GPSM2/KBTBD7/FGF10/KALRN/ADRA2A/USP50/PLD1/GIT2/ARFGAP1/RIPOR2/GARNL3/RAPGEF3/KSR2/SSX2IP/ITGA3/GPR65/ARHGAP27/RABL3/ARHGAP40/STARD13/RAB4A/ABRA/SRGAP2/ARFGEF1/NET1/KCTD13	35
GO:0007173	epidermal growth factor receptor signaling pathway	9/967	14/1831	0.278095	0.999326	0.999326	ERRFI1/GAB1/BRAF/SOS1/KIF16B/CBLB/ERBIN/GPRC5A/SNX6	9
GO:0043473	pigmentation	9/967	14/1831	0.278095	0.999326	0.999326	BCL2/FIG4/ZEB2/USP13/SOD2/SHROOM2/HPS5/MITF/SLC45A2	9
GO:0048640	negative regulation of developmental growth	9/967	14/1831	0.278095	0.999326	0.999326	SEMA5A/WWC1/JARID2/CDKL3/HDAC6/FSTL4/SOCS2/MECP2/RGS2	9
GO:0051099	positive regulation of binding	9/967	14/1831	0.278095	0.999326	0.999326	BDNF/FMR1/TIAM1/PINX1/USP9X/RIPOR2/HFE/NCBP1/IDE	9
GO:0061912	selective autophagy	9/967	14/1831	0.278095	0.999326	0.999326	HTT/SPATA33/SNX18/BECN1/SNX7/HUWE1/HDAC6/SPTLC1/RETREG1	9
GO:0071322	cellular response to carbohydrate stimulus	9/967	14/1831	0.278095	0.999326	0.999326	ZNF236/SLC9B2/MAP2K6/TIAM1/ACE/ADRA2A/EPHA5/STXBP4/SIN3A	9
GO:0120162	positive regulation of cold-induced thermogenesis	9/967	14/1831	0.278095	0.999326	0.999326	IRF4/SYK/ZNF516/KDM6B/ALMS1/THRA/SFXN5/KSR2/PPARGC1A	9
GO:0150115	cell-substrate junction organization	9/967	14/1831	0.278095	0.999326	0.999326	SORBS1/ARHGAP6/PTPRK/BCL2/ACTN2/THY1/FMN1/WHAMM/PTPRA	9
GO:1900180	regulation of protein localization to nucleus	9/967	14/1831	0.278095	0.999326	0.999326	WWTR1/NPM1/PINX1/IPO7/MAVS/PRKD1/SIN3A/SUMO3/ANGPT1	9
GO:0051247	positive regulation of protein metabolic process	81/967	146/1831	0.279151	0.999326	0.999326	CTSC/BDNF/FMR1/VIP/CAMTA1/CCBE1/RAD50/SLC25A37/HGF/RPTOR/RAP2C/RICTOR/METTL3/GNA12/NPM1/YTHDF1/MAP2K6/TLR4/BRAF/BCL2/SYK/FOXL2/GSAP/IP6K2/TOLLIP/KHDRBS1/PTPN1/FGF10/CUL4B/NEK10/UBE3A/ACE/ADRA2A/BACE1-AS/USP50/PLD1/CBLB/USP13/IFNGR1/NDFIP2/SH3RF2/FBXW11/POMT1/MAVS/UHMK1/PRKD1/APAF1/MAP3K7/SIRT1/SH3RF1/TANK/FZD1/SLCO3A1/HUWE1/CACUL1/TNFSF18/POLDIP3/ASPSCR1/HDAC6/HMGA2/STRADB/WDFY2/NIBAN1/FGF9/TIPAR…	81
GO:0072521	purine-containing compound metabolic process	30/967	52/1831	0.283701	0.999326	0.999326	NT5E/ACSL3/RPTOR/KCNAB2/ACP3/HMGCS1/ATP6V1B2/IDO1/SLC25A16/DPYD/GPD1L/NAXD/IDO2/ENTPD4/PTHLH/GCDH/ENPP4/AK4/SLC16A9/SLC4A7/FMO5/SULT1A1/PRPS1/SLC25A13/PPARGC1A/ME2/DNM1L/NADSYN1/MLYCD/ELOVL7	30
GO:0045596	negative regulation of cell differentiation	36/967	63/1831	0.284268	0.999326	0.999326	WWTR1/INSIG1/SRA1/BDNF/SHB/SEMA5A/TLR4/EXTL3/NBR1/SPRED1/HEY2/FGF10/HOXB8/STAT1/THY1/ASXL1/IPO7/SOD2/PTHLH/SIRT1/TNFSF18/CDKL3/HDAC6/ZFPM1/MBNL3/DIXDC1/FGF9/RC3H2/SINHCAF/PTGR3/FSTL4/NEPRO/MECP2/RGS2/FRZB/STAT5B	36
GO:0099003	vesicle-mediated transport in synapse	19/967	32/1831	0.28491	0.999326	0.999326	FMR1/TBC1D24/BRAF/AP3B2/VAMP4/CANX/FCHO2/ATP6V1B2/STXBP5/PLD1/GIT2/DNAJC5/PPFIA2/DOC2B/AP3M2/AMPH/ATP2A2/SYT11/STX2	19
GO:0007601	visual perception	14/967	23/1831	0.28618	0.999326	0.999326	SLC24A1/RAX/GJC1/GLRB/GPR179/IRX5/RPGR/GABRR2/POU6F2/CABP4/RRH/ATXN7/SLC45A2/MYO3B	14
GO:0007623	circadian rhythm	14/967	23/1831	0.28618	0.999326	0.999326	METTL3/KMT2A/BHLHE40/TPH1/USP9X/UBE3A/THRAP3/MAPK10/FBXW11/SIRT1/SETX/SIN3A/HUWE1/PPARGC1A	14
GO:0009952	anterior/posterior pattern specification	14/967	23/1831	0.28618	0.999326	0.999326	RNF2/KMT2A/HOXD3/BHLHE40/GRSF1/HEY2/HOXB8/HOXA4/HEYL/POFUT1/FOXB1/HOXC6/TIFAB/POGLUT1	14
GO:0031023	microtubule organizing center organization	14/967	23/1831	0.28618	0.999326	0.999326	NPM1/KIAA1614/KIF3A/ALMS1/MCPH1/FBXW11/TMEM67/SIRT1/MPDZ/SSX2IP/POC1B/CCDC102B/RANBP1/MDM1	14
GO:1901888	regulation of cell junction assembly	14/967	23/1831	0.28618	0.999326	0.999326	BDNF/STAU2/ARHGAP6/THY1/ACE/FMN1/ST8SIA2/FZD1/ADGRB3/MUSK/NECTIN1/APLNR/PTPRA/IKBKB	14
GO:0051960	regulation of nervous system development	25/967	43/1831	0.290878	0.999326	0.999326	CTSC/BDNF/CAPRIN1/TBC1D24/STAU2/SEMA5A/BRAF/TIAM1/BHLHE40/HEY2/THY1/ETV5/FIG4/ACE/HEYL/ST8SIA2/CDKL3/HDAC6/ADGRB3/FSTL4/CAMK2B/MECP2/ZFYVE27/IST1/SS18L1	25
GO:0051336	regulation of hydrolase activity	37/967	65/1831	0.292047	0.999326	0.999326	HTT/SERPINB8/HGF/ARHGAP6/GNA12/NPM1/SOS1/SYK/FOXL2/SH3BP4/TIAM1/THY1/SNX18/USP50/RGS6/EPHA5/RIPOR2/GARNL3/APAF1/RAPGEF3/SIRT1/SH3RF1/TANK/GPR65/PKP4/CAAP1/ARHGAP27/CARD8/CAST/AGAP1/AGAP4/SRGAP2/RGS2/TBC1D9B/ARFGEF1/NET1/IKBKB	37
GO:0046700	heterocycle catabolic process	31/967	54/1831	0.29257	0.999326	0.999326	FMR1/VIP/NT5E/CAPRIN1/APOBEC3D/ALDH4A1/APOBEC3F/LRPPRC/METTL3/NPM1/YTHDF1/FOXL2/GRSF1/IDO1/DPYD/AGO1/THRAP3/IDO2/ENTPD4/APAF1/AGO4/PNPT1/ENPP4/RC3H2/TNRC6B/SLC11A1/NCBP1/NCBP2/ZCCHC8/FASTKD1/MLYCD	31
GO:0007169	transmembrane receptor protein tyrosine kinase signaling pathway	44/967	78/1831	0.297102	0.999326	0.999326	BDNF/CCBE1/SORBS1/ERRFI1/HGF/GAB1/BRAF/SOS1/SYK/TIAM1/PTPN1/FGF10/PTPRE/KALRN/KIF16B/SHCBP1/CBLB/EPN2/EPHA5/TMEM108/ERBIN/PRKD1/STXBP4/SIRT1/ZDHHC17/PTPN18/SETX/GPRC5A/GRB14/SNX6/FGF9/TIPARP/FSTL4/SOCS2/SULF1/FGFBP3/ANGPT1/STAT5A/IDE/MUSK/ZFYVE27/STAT5B/CASS4/PTPRA	44
GO:0010563	negative regulation of phosphorus metabolic process	20/967	34/1831	0.297336	0.999326	0.999326	WWTR1/ERRFI1/HGF/NPM1/ADARB1/SPRED1/PTPN1/THY1/IPO7/GPD1L/CBLB/PTPRQ/SIRT1/GPRC5A/DNAJC10/NIBAN1/SNX6/ANGPT1/RGS2/IKBKB	20
GO:0045936	negative regulation of phosphate metabolic process	20/967	34/1831	0.297336	0.999326	0.999326	WWTR1/ERRFI1/HGF/NPM1/ADARB1/SPRED1/PTPN1/THY1/IPO7/GPD1L/CBLB/PTPRQ/SIRT1/GPRC5A/DNAJC10/NIBAN1/SNX6/ANGPT1/RGS2/IKBKB	20
GO:0071559	response to transforming growth factor beta	20/967	34/1831	0.297336	0.999326	0.999326	ZNF451/KMT2A/PTPRK/SNX25/STK16/SPRED1/WWOX/USP9X/ZEB2/ING1/APAF1/MAP3K7/SIRT1/SIN3A/ITGA3/SNX6/SINHCAF/RBBP7/PPM1A/SMURF2	20
GO:0071560	cellular response to transforming growth factor beta stimulus	20/967	34/1831	0.297336	0.999326	0.999326	ZNF451/KMT2A/PTPRK/SNX25/STK16/SPRED1/WWOX/USP9X/ZEB2/ING1/APAF1/MAP3K7/SIRT1/SIN3A/ITGA3/SNX6/SINHCAF/RBBP7/PPM1A/SMURF2	20
GO:0048514	blood vessel morphogenesis	38/967	67/1831	0.299643	0.999326	0.999326	CCBE1/SHB/WNT7B/GAB1/PKNOX1/SEMA5A/VASH1/SOS1/GJC1/SYK/SPRED1/HEY2/FGF10/STAT1/THY1/ACE/AGO1/FMNL3/EPN2/POFUT1/TFAP2B/PRKD1/RAPGEF3/SIRT1/STIM1/HMGA2/ADGRB3/HTATIP2/FGF9/TIPARP/TMEM215/SULF1/STARD13/C1GALT1/ANGPT1/MECP2/APLNR/ATP2B4	38
GO:0000422	autophagy of mitochondrion	10/967	16/1831	0.30068	0.999326	0.999326	HTT/SPATA18/SPATA33/BECN1/SNX7/HUWE1/HDAC6/RETREG1/MARK2/DNM1L	10
GO:0002705	positive regulation of leukocyte mediated immunity	10/967	16/1831	0.30068	0.999326	0.999326	TP53BP1/SHLD2/NECTIN2/STX7/NCR3/MAVS/MAP3K7/HFE/ITGB2/STAT5B	10
GO:0007338	single fertilization	10/967	16/1831	0.30068	0.999326	0.999326	FOXL2/GLRB/CCDC136/UBE3A/SYT6/WDR48/TRIM36/WBP2NL/AKAP3/STX2	10
GO:0008593	regulation of Notch signaling pathway	10/967	16/1831	0.30068	0.999326	0.999326	WWP2/METTL3/HEY2/FGF10/EPN2/POFUT1/BEND6/POGLUT1/CBFA2T2/NEPRO	10
GO:0015908	fatty acid transport	10/967	16/1831	0.30068	0.999326	0.999326	ACSL3/RBP5/MAP2K6/FABP5P3/CPT1A/SYK/SLCO2A1/ABCC4/ACE/SLCO3A1	10
GO:0030041	actin filament polymerization	10/967	16/1831	0.30068	0.999326	0.999326	ARHGAP6/RICTOR/FCHSD1/EPS8/SPIRE1/ARPC5L/FMN1/LMOD1/ARHGAP40/ARFGEF1	10
GO:0038127	ERBB signaling pathway	10/967	16/1831	0.30068	0.999326	0.999326	ERRFI1/GAB1/BRAF/SOS1/KIF16B/CBLB/ERBIN/PTPN18/GPRC5A/SNX6	10
GO:0046683	response to organophosphorus	10/967	16/1831	0.30068	0.999326	0.999326	NT5E/BRAF/ABCC9/STAT1/AQP9/TOP2B/THBD/RAPGEF3/PNPT1/AKAP9	10
GO:0050866	negative regulation of cell activation	10/967	16/1831	0.30068	0.999326	0.999326	IDO1/TNFRSF13B/CBLB/RIPOR2/THBD/TNFSF18/ARG2/HFE/RC3H2/SYT11	10
GO:0051260	protein homooligomerization	10/967	16/1831	0.30068	0.999326	0.999326	G3BP2/TP53BP1/SPAST/SLC1A2/SOD2/KCNA1/PNPT1/ALDH1A3/KCNC4/KCTD13	10
GO:0060759	regulation of response to cytokine stimulus	10/967	16/1831	0.30068	0.999326	0.999326	METTL3/TLR4/SYK/PTPN1/MAVS/CARD8/LRRC70/ANGPT1/GFI1/IKBKB	10
GO:0061726	mitochondrion disassembly	10/967	16/1831	0.30068	0.999326	0.999326	HTT/SPATA18/SPATA33/BECN1/SNX7/HUWE1/HDAC6/RETREG1/MARK2/DNM1L	10
GO:0071772	response to BMP	10/967	16/1831	0.30068	0.999326	0.999326	USP9X/HEYL/TFAP2B/FZD1/ITGA3/HFE/FSTL4/SULF1/PPM1A/SMURF2	10
GO:0071773	cellular response to BMP stimulus	10/967	16/1831	0.30068	0.999326	0.999326	USP9X/HEYL/TFAP2B/FZD1/ITGA3/HFE/FSTL4/SULF1/PPM1A/SMURF2	10
GO:1903313	positive regulation of mRNA metabolic process	10/967	16/1831	0.30068	0.999326	0.999326	CAPRIN1/METTL3/YTHDF1/WDR77/THRAP3/PNPT1/RC3H2/TNRC6B/NCBP1/NCBP2	10
GO:1904064	positive regulation of cation transmembrane transport	10/967	16/1831	0.30068	0.999326	0.999326	HTT/ATP1B2/ACTN2/JPH2/THY1/WNK2/STIM1/AKAP9/APLNR/STIMATE	10
GO:2000377	regulation of reactive oxygen species metabolic process	10/967	16/1831	0.30068	0.999326	0.999326	SIRT3/TLR4/BCL2/SYK/BECN1/SOD2/ARG2/HDAC6/ITGB2/DUOXA1	10
GO:0003002	regionalization	26/967	45/1831	0.300945	0.999326	0.999326	RNF2/TTC21B/WNT7B/KMT2A/HOXD3/BHLHE40/GRSF1/HEY2/SETDB2/TMEM107/FGF10/HOXB8/HOXA4/RFX8/HEYL/RFX3/PSKH1/GORAB/POFUT1/FOXB1/HOXC6/TIFAB/POGLUT1/TLL1/DNAAF11/APLNR	26
GO:0006417	regulation of translation	26/967	45/1831	0.300945	0.999326	0.999326	FMR1/CAPRIN1/WTIP/EIF4E3/LRPPRC/METTL3/NPM1/YTHDF1/BZW2/KHDRBS1/EIF2AK2/BACE1-AS/AGO1/PTCD3/PLD1/UHMK1/MTG2/AGO4/PNPT1/POLDIP3/NIBAN1/RC3H2/TNRC6B/NCBP1/RGS2/NCBP2	26
GO:0002791	regulation of peptide secretion	15/967	25/1831	0.30186	0.999326	0.999326	SIRT3/SLC9B2/CPT1A/TIAM1/ADRA2A/RFX3/EPHA5/CAPN10/TFAP2B/PRKD1/STXBP4/TM7SF3/HFE/DOC2B/GNAZ	15
GO:0007219	Notch signaling pathway	15/967	25/1831	0.30186	0.999326	0.999326	WWP2/PSEN2/METTL3/HOXD3/HEY2/FGF10/HEYL/EPN2/POFUT1/BEND6/POGLUT1/CBFA2T2/NEPRO/MECP2/SORBS2	15
GO:0015718	monocarboxylic acid transport	15/967	25/1831	0.30186	0.999326	0.999326	ACSL3/RBP5/MAP2K6/FABP5P3/CPT1A/SYK/SLCO2A1/ABCC4/SLC16A7/AQP9/ACE/SLCO3A1/SLC6A13/SLC10A7/SLC16A9	15
GO:0043524	negative regulation of neuron apoptotic process	15/967	25/1831	0.30186	0.999326	0.999326	BDNF/BRAF/BCL2/SOD2/TFAP2B/FOXB1/SIRT1/FZD1/DNAJC5/SNX6/PPARGC1A/SET/ANGPT1/RETREG1/MECP2	15
GO:0048167	regulation of synaptic plasticity	15/967	25/1831	0.30186	0.999326	0.999326	FMR1/SLC24A1/HRH1/STAU2/KMT2A/YTHDF1/BRAF/KCNQ3/ZDHHC2/UBE3A/ACE/IGSF11/CAMK2B/MECP2/NETO1	15
GO:0051259	protein complex oligomerization	15/967	25/1831	0.30186	0.999326	0.999326	G3BP2/TP53BP1/SPAST/HGSNAT/SLC1A2/SOD2/KCNA1/PNPT1/TRPM6/FARSB/ALDH1A3/TMEM120B/KCNC4/DNM1L/KCTD13	15
GO:0090087	regulation of peptide transport	15/967	25/1831	0.30186	0.999326	0.999326	SIRT3/SLC9B2/CPT1A/TIAM1/ADRA2A/RFX3/EPHA5/CAPN10/TFAP2B/PRKD1/STXBP4/TM7SF3/HFE/DOC2B/GNAZ	15
GO:0090276	regulation of peptide hormone secretion	15/967	25/1831	0.30186	0.999326	0.999326	SIRT3/SLC9B2/CPT1A/TIAM1/ADRA2A/RFX3/EPHA5/CAPN10/TFAP2B/PRKD1/STXBP4/TM7SF3/HFE/DOC2B/GNAZ	15
GO:0034654	nucleobase-containing compound biosynthetic process	254/967	471/1831	0.305529	0.999326	0.999326	WWTR1/IGSF1/SRA1/FMR1/MXD4/ZNF195/IRF4/G3BP2/CAMTA1/PTOV1/ZNF19/NT5E/WTIP/RNF2/RAD50/WWP2/ZNF451/ZNF264/APOBEC3D/TCF4/SP3/SLC38A3/TTC21B/HGF/ACSL3/TP53BP1/PKNOX1/RPTOR/APOBEC3F/ZNF526/ZNF391/RAP2C/RAX/E2F5/KMT2A/GTF3C3/PTPRK/NPM1/WDR43/ZNF286A/ZNF236/TESMIN/YWHAQ/GMEB2/STK16/ZNF362/NFE2L1/TLR4/ZNF493/UBTF/ZNF793/INTS7/SOS1/ZNF546/HOXD3/ZNF383/SYK/ING5/CBX6/FOXL2/ARID1B/L3MBTL4/ZNF516/TCEA3/ADORA3…	254
GO:0051726	regulation of cell cycle	66/967	119/1831	0.307691	0.999326	0.999326	ATRIP/SRA1/KLHL18/MX2/RAD50/SHB/TP53BP1/SPDL1/RPTOR/METTL3/PTPRK/NPM1/MAP2K6/VASH1/SPAST/INTS7/BCL2/ING5/ARID1B/SMC4/ADARB1/GPSM2/TOPBP1/ALMS1/FGF10/MCPH1/FEM1B/CUL4B/PINX1/BECN1/ZNF268/NEK10/C6orf89/THAP5/IPO7/USP44/RBL1/TMEM8B/TMEM14B/RAB11FIP3/CCDC8/WDR76/UHMK1/STXBP4/TRRAP/TRIM36/MAP3K7/TMEM67/SIRT1/SIN3A/PNPT1/MDM4/CDKL3/HMGA2/PKP4/MAP10/RANBP1/ANAPC4/MECP2/MDM1/AHCTF1/STAT5B/BORA/ATP2B4/PPM…	66
GO:0051656	establishment of organelle localization	33/967	58/1831	0.309532	0.999326	0.999326	HTT/EXOC7/SPDL1/LRPPRC/TRAK2/NPM1/BICD2/SPAST/AP3B2/SYK/GPSM2/SPIRE1/NECTIN2/KIF3A/FGF10/MCPH1/PINX1/BICDL1/BECN1/EXOC2/FBXW11/SHROOM2/TANC2/HDAC6/PPFIA2/AP3M2/SYT11/SYNE3/MECP2/DNM1L/LIN7A/SPG11/TMEM201	33
GO:0090066	regulation of anatomical structure size	33/967	58/1831	0.309532	0.999326	0.999326	BDNF/RIN3/HRH1/WNT7B/RPTOR/SEMA5A/RICTOR/NPM1/FCHSD1/EPS8/ACTN2/WDR1/ACE/ASXL1/ADRA2A/ARPC5L/SOD2/PRKD1/FMN1/MAP3K7/SIN3A/CDKL3/HDAC6/LMOD1/UTS2B/ARHGAP40/FSTL4/RGS2/RAB22A/ZFYVE27/IST1/ARFGEF1/MYO3B	33
GO:0002831	regulation of response to biotic stimulus	27/967	47/1831	0.310632	0.999326	0.999326	IRF4/APOBEC3F/METTL3/SEC14L1/MAP2K6/TLR4/SYK/NECTIN2/PTPN1/STAT1/IRAK4/ZDHHC11/EIF2AK2/SMPDL3B/USP50/NCR3/ERBIN/MAVS/PRKD1/MAP3K7/SIN3A/ARG2/CARD8/SYT11/STAT5B/GFI1/IKBKB	27
GO:0032990	cell part morphogenesis	53/967	95/1831	0.312171	0.999326	0.999326	MFF/BDNF/CAPRIN1/TBC1D24/STAU2/WNT7B/SEMA5A/YTHDF1/SPAST/BRAF/SOS1/ENAH/BCL2/ADARB1/ARPIN/TIAM1/SNX1/NECTIN2/THY1/KALRN/USP9X/NEXN/EPHA5/TMEM108/FOXB1/TOP2B/ST8SIA2/ZDHHC17/SIN3A/PNPT1/SULT4A1/TANC2/EPB41L3/CDKL3/HDAC6/ADGRB3/PPFIA2/DRGX/B4GALT5/FSTL4/CAMK2B/SRGAP2/MECP2/MARK2/ZFYVE27/IST1/NECTIN1/NCAM1/DNM1L/UST/ETV1/SS18L1/SPG11	53
GO:0051223	regulation of protein transport	40/967	71/1831	0.314315	0.999326	0.999326	INSIG1/MFF/SIRT3/WWP2/ERLEC1/ACSL3/SLC9B2/TLR4/YOD1/CPT1A/TIAM1/PTPN1/TCAF1/ZDHHC2/ADRA2A/ATP2C1/UBE2J1/STXBP5/RFX3/EPHA5/RAB11FIP3/NDFIP2/CAPN10/TFAP2B/MAVS/UHMK1/PRKD1/STXBP4/RAB11FIP1/RAPGEF3/HUWE1/MIEF1/TM7SF3/ZFAND1/ITGB2/DOC2B/GNAZ/ANGPT1/DNM1L/PPM1A	40
GO:0007179	transforming growth factor beta receptor signaling pathway	16/967	27/1831	0.316377	0.999326	0.999326	ZNF451/PTPRK/SNX25/SPRED1/USP9X/ZEB2/ING1/MAP3K7/SIRT1/SIN3A/ITGA3/SNX6/SINHCAF/RBBP7/PPM1A/SMURF2	16
GO:0010976	positive regulation of neuron projection development	16/967	27/1831	0.316377	0.999326	0.999326	BDNF/CAPRIN1/STAU2/ATP1B2/BRAF/TIAM1/PRKD1/FZD1/SETX/ITGA3/SF3A2/CAMK2B/CBFA2T2/RGS2/MARK2/MUSK	16
GO:0060322	head development	47/967	84/1831	0.316886	0.999326	0.999326	TTBK2/ANKRD11/TTC21B/WNT7B/SEMA5A/METTL3/RAX/AFF2/YWHAQ/ATP1B2/BRAF/SOS1/BCL2/KDM6B/FGF10/MCPH1/UBE3A/WDR89/WHRN/GIT2/TMEM14B/MACO1/EPHA5/SLC1A2/FBXW11/TMEM108/FOXB1/TOP2B/SHROOM2/KCNA1/APAF1/JHY/FZD1/SIN3A/DIXDC1/FGF9/FAT4/TIPARP/ALDH1A3/RBBP7/SRGAP2/MECP2/ATP2B4/ATXN1/FUT10/CCDC14/C21orf91	47
GO:0009966	regulation of signal transduction	184/967	340/1831	0.317983	0.999326	0.999326	WWTR1/INSIG1/CTSC/IGSF1/SIRT3/BDNF/HTT/MID1/IRF4/CAMTA1/IFNAR2/WTIP/TBC1D24/CCBE1/SORBS1/WWP2/ZNF451/ERRFI1/TTC21B/HGF/WNT7B/DYRK2/ABCA7/RPTOR/ARHGAP6/SEMA5A/RICTOR/METTL3/ACP3/GNA12/SNX25/NPM1/SEC14L1/TMEM9B/MAP2K6/TLR4/EEF1E1/EPS8/BRAF/SOS1/BCL2/SYK/ING5/SH3BP4/TIAM1/EXTL3/NBR1/SPRED1/HEY2/KBTBD7/KDM4C/NECTIN2/WWOX/PTPN1/FGF10/THRA/GRK3/STAT1/IRAK4/THY1/PTPRE/TMEM127/WWC1/FEM1B/KALRN/BECN1/USP9…	184
GO:0031400	negative regulation of protein modification process	28/967	49/1831	0.319965	0.999326	0.999326	WWTR1/TBC1D24/ERRFI1/HGF/NPM1/ADARB1/SPRED1/PTPN1/THY1/PINX1/IPO7/GPD1L/USP44/CBLB/PTPRQ/SH3RF2/SIRT1/GPRC5A/DNAJC10/HDAC6/NIBAN1/SNX6/SET/USP4/ANGPT1/RGS2/ATP2B4/IKBKB	28
GO:0006606	protein import into nucleus	11/967	18/1831	0.320552	0.999326	0.999326	SYK/KCNQ3/IPO7/CBLB/ING1/MAVS/PRKD1/FGF9/ANGPT1/ABRA/SPG11	11
GO:0008064	regulation of actin polymerization or depolymerization	11/967	18/1831	0.320552	0.999326	0.999326	SEMA5A/RICTOR/FCHSD1/EPS8/ACTN2/WDR1/ARPC5L/FMN1/LMOD1/ARHGAP40/ARFGEF1	11
GO:0034394	protein localization to cell surface	11/967	18/1831	0.320552	0.999326	0.999326	BDNF/ABCA7/KCNAB2/PTPRK/ACTN2/FGF10/GPD1L/HFE/MESD/USP4/ANGPT1	11
GO:0034767	positive regulation of monoatomic ion transmembrane transport	11/967	18/1831	0.320552	0.999326	0.999326	HTT/ATP1B2/ACTN2/JPH2/TCAF1/THY1/WNK2/STIM1/AKAP9/APLNR/STIMATE	11
GO:2000779	regulation of double-strand break repair	11/967	18/1831	0.320552	0.999326	0.999326	ATRIP/TP53BP1/ARID1B/SHLD2/SPIRE1/SMCHD1/WDR48/TOP2B/TRRAP/SIRT1/HMGA2	11
GO:0031325	positive regulation of cellular metabolic process	202/967	374/1831	0.322163	0.999326	0.999326	WWTR1/SRA1/SIRT3/BDNF/FMR1/HTT/IRF4/VIP/CAMTA1/PTOV1/CAPRIN1/HK1/CCBE1/SORBS1/RAD50/WWP2/HRH1/SLC25A37/TCF4/SP3/SLC38A3/TTC21B/HGF/ACSL3/DYRK2/TP53BP1/PKNOX1/RPTOR/RAP2C/RICTOR/METTL3/RAX/E2F5/KMT2A/GNA12/NPM1/WDR43/YTHDF1/GMEB2/STK16/MAP2K6/TLR4/ZNF493/EEF1E1/UBTF/BRAF/CPT1A/HOXD3/BCL2/SYK/FOXL2/ARID1B/SH3BP4/ZNF516/SHLD2/IP6K2/ZNF208/KHDRBS1/ACTN2/GRSF1/SPIRE1/HEY2/KDM6B/KDM4C/CAND1/WWOX/LIPT2/…	202
GO:0061024	membrane organization	48/967	86/1831	0.32324	0.999326	0.999326	INSIG1/VIPAS39/THEM4/VTI1A/EXOC7/ABCA7/ATP8B2/TOMM22/FCHSD1/SPAST/AP3B2/VPS36/BCL2/VAMP4/GLRB/FCHO2/SPIRE1/GULP1/NECTIN2/ZDHHC2/SNX18/BECN1/ATP2C1/VPS41/STX7/SPG7/STX18/EXOC2/ATP9B/TMCC1/HUWE1/DNAJC11/EPB41L3/PLEKHM1/WHAMM/ITGB2/DOC2B/MESD/AP3M2/TOR1AIP1/ATP2A2/SYT11/VCPIP1/MUSK/DNM1L/TOMM5/STX2/SPG11	48
GO:0009719	response to endogenous stimulus	99/967	181/1831	0.32448	0.999326	0.999326	INSIG1/SRA1/BDNF/CCBE1/SORBS1/ZNF451/HRH1/HGF/WNT7B/GAB1/RPTOR/KMT2A/PTPRK/SNX25/STK16/TLR4/BRAF/SOS1/BCL2/POR/SYK/ARID1B/SH3BP4/ACTN2/SPRED1/KDM4C/DYNC1LI2/WWOX/PTPN1/TMEM107/FGF10/THRA/STAT1/PTPRE/AQP9/BECN1/USP9X/UBE3A/ACE/ADRA2A/KIF16B/SHCBP1/HEYL/ZEB2/UFSP2/EPN2/SLC24A4/ING1/SLC1A2/TMEM108/GCNT1/CAPN10/TFAP2B/PRKD1/TOP2B/STXBP4/MEAK7/APAF1/MAP3K7/RAPGEF3/SIRT1/SH3RF1/ZDHHC17/FZD1/SETX/SIN3A/…	99
GO:0055086	nucleobase-containing small molecule metabolic process	35/967	62/1831	0.325545	0.999326	0.999326	NT5E/APOBEC3D/ACSL3/RPTOR/APOBEC3F/KCNAB2/ACP3/HMGCS1/UGGT1/ATP6V1B2/IDO1/SLC25A16/DPYD/GPD1L/DHFR2/UGGT2/NAXD/IDO2/ENTPD4/PTHLH/GCDH/ENPP4/AK4/SLC4A7/FMO5/SULT1A1/SLC35A3/PRPS1/SLC25A13/PPARGC1A/ME2/DNM1L/NADSYN1/MLYCD/ELOVL7	35
GO:0031175	neuron projection development	70/967	127/1831	0.327814	0.999326	0.999326	BDNF/FMR1/CAPRIN1/TBC1D24/STAU2/WNT7B/SEMA5A/YTHDF1/ATP1B2/SPAST/BRAF/SOS1/ENAH/BCL2/ADARB1/TIAM1/THY1/CUL4B/KALRN/BICDL1/USP9X/WHRN/NCS1/NEXN/EPHA5/EFHC2/TMEM108/UHMK1/FOXB1/PRKD1/TOP2B/KCNA1/ST8SIA2/ZDHHC17/FZD1/LRP12/SETX/SIN3A/SULT4A1/TANC2/EPB41L3/CDKL3/ITGA3/HDAC6/ADGRB3/PPFIA2/GRIN3A/SF3A2/DRGX/B4GALT5/FSTL4/CAMK2B/CBFA2T2/FAT3/STRN/SRGAP2/MECP2/RGS2/MARK2/MUSK/ZFYVE27/IST1/NECTIN1/NCAM1/G…	70
GO:0007389	pattern specification process	29/967	51/1831	0.328969	0.999326	0.999326	MID1/RNF2/TTC21B/WNT7B/RAX/KMT2A/HOXD3/BHLHE40/GRSF1/HEY2/SETDB2/TMEM107/FGF10/HOXB8/WDR77/HOXA4/RFX8/HEYL/RFX3/PSKH1/GORAB/POFUT1/FOXB1/HOXC6/TIFAB/POGLUT1/TLL1/DNAAF11/APLNR	29
GO:0031346	positive regulation of cell projection organization	29/967	51/1831	0.328969	0.999326	0.999326	BDNF/FMR1/HTT/CAPRIN1/TBC1D24/STAU2/SEMA5A/ATP1B2/EPS8/BRAF/TIAM1/RIPOR2/PRKD1/FZD1/SETX/CDKL3/PLEKHM1/ITGA3/HDAC6/SF3A2/CAMK2B/CBFA2T2/RGS2/MARK2/MUSK/ZFYVE27/IST1/MYO3B/SS18L1	29
GO:0048858	cell projection morphogenesis	49/967	88/1831	0.32948	0.999326	0.999326	BDNF/CAPRIN1/TBC1D24/STAU2/WNT7B/SEMA5A/YTHDF1/SPAST/BRAF/SOS1/ENAH/BCL2/ADARB1/ARPIN/TIAM1/SNX1/THY1/KALRN/USP9X/NEXN/EPHA5/TMEM108/FOXB1/TOP2B/ST8SIA2/ZDHHC17/SIN3A/SULT4A1/TANC2/EPB41L3/CDKL3/HDAC6/ADGRB3/PPFIA2/DRGX/B4GALT5/FSTL4/CAMK2B/SRGAP2/MECP2/MARK2/ZFYVE27/IST1/NECTIN1/NCAM1/UST/ETV1/SS18L1/SPG11	49
GO:0120039	plasma membrane bounded cell projection morphogenesis	49/967	88/1831	0.32948	0.999326	0.999326	BDNF/CAPRIN1/TBC1D24/STAU2/WNT7B/SEMA5A/YTHDF1/SPAST/BRAF/SOS1/ENAH/BCL2/ADARB1/ARPIN/TIAM1/SNX1/THY1/KALRN/USP9X/NEXN/EPHA5/TMEM108/FOXB1/TOP2B/ST8SIA2/ZDHHC17/SIN3A/SULT4A1/TANC2/EPB41L3/CDKL3/HDAC6/ADGRB3/PPFIA2/DRGX/B4GALT5/FSTL4/CAMK2B/SRGAP2/MECP2/MARK2/ZFYVE27/IST1/NECTIN1/NCAM1/UST/ETV1/SS18L1/SPG11	49
GO:0016477	cell migration	93/967	170/1831	0.330924	0.999326	0.999326	TTBK2/TBC1D24/CCBE1/RIN3/HGF/SPDL1/GAB1/RAP2C/SEMA5A/PTPRK/GNA12/ITGBL1/TLR4/ATP1B2/VASH1/EPS8/BRAF/SOS1/BCL2/SYK/ADARB1/ARPIN/TIAM1/ADORA3/SPRED1/SELL/XCR1/TCAF1/FGF10/TMEM18/IRAK4/THY1/WWC1/ZNF268/USP9X/WDR1/ACE/ADRA2A/FMNL3/ARPC5L/ZEB2/NEXN/FRMD5/KIAA0319L/ING1/SH3RF2/RIPOR2/GCNT1/SOD2/FOXB1/PRKD1/TOP2B/SHROOM2/MEAK7/MAP3K7/SIRT1/SH3RF1/LRP12/SIN3A/TNFSF18/ITGA3/ACKR2/HDAC6/CCR5/MITF/STK10/ITG…	93
GO:0009306	protein secretion	23/967	40/1831	0.330974	0.999326	0.999326	SIRT3/VIP/SLC9B2/TMEM167A/TLR4/CPT1A/TIAM1/CANX/ADRA2A/STXBP5/RFX3/EPHA5/TANGO6/RAB11FIP3/CAPN10/TFAP2B/STXBP4/RAB11FIP1/TM7SF3/DOC2B/PDIA4/GNAZ/DNM1L	23
GO:0035592	establishment of protein localization to extracellular region	23/967	40/1831	0.330974	0.999326	0.999326	SIRT3/VIP/SLC9B2/TMEM167A/TLR4/CPT1A/TIAM1/CANX/ADRA2A/STXBP5/RFX3/EPHA5/TANGO6/RAB11FIP3/CAPN10/TFAP2B/STXBP4/RAB11FIP1/TM7SF3/DOC2B/PDIA4/GNAZ/DNM1L	23
GO:0051056	regulation of small GTPase mediated signal transduction	23/967	40/1831	0.330974	0.999326	0.999326	ARHGAP6/EPS8/SOS1/TIAM1/KBTBD7/FGF10/KALRN/GIT2/ARFGAP1/RIPOR2/GARNL3/SSX2IP/ITGA3/GPR65/ARHGAP27/RABL3/ARHGAP40/STARD13/ABRA/SRGAP2/ARFGEF1/NET1/KCTD13	23
GO:0071692	protein localization to extracellular region	23/967	40/1831	0.330974	0.999326	0.999326	SIRT3/VIP/SLC9B2/TMEM167A/TLR4/CPT1A/TIAM1/CANX/ADRA2A/STXBP5/RFX3/EPHA5/TANGO6/RAB11FIP3/CAPN10/TFAP2B/STXBP4/RAB11FIP1/TM7SF3/DOC2B/PDIA4/GNAZ/DNM1L	23
GO:1990778	protein localization to cell periphery	23/967	40/1831	0.330974	0.999326	0.999326	SYS1/NECTIN3/SORBS1/ACSL3/GORASP2/TTC7A/GPSM2/FCHO2/ACTN2/ZDHHC2/MAP7/ATP2C1/STX7/ARFRP1/EPB41L3/ITGA3/EFR3A/NETO1/ZFYVE27/ATP2B4/LIN7A/IKBKB/AP4M1	23
GO:0000902	cell morphogenesis	71/967	129/1831	0.332708	0.999326	0.999326	BDNF/CAPRIN1/WTIP/TBC1D24/STAU2/HGF/WNT7B/SEMA5A/METTL3/GNA12/YTHDF1/SPAST/EPS8/BRAF/SOS1/TBCD/ENAH/BCL2/ADARB1/ARPIN/TIAM1/SNX1/THY1/KALRN/ZMYM3/USP9X/WDR1/ASXL1/WHRN/FMNL3/NEXN/TFCP2L1/EPHA5/TMEM108/FOXB1/TOP2B/MYO10/ST8SIA2/ZMYM6/ZDHHC17/SIN3A/AGO4/SULT4A1/TANC2/EPB41L3/CABP4/CDKL3/HDAC6/ADGRB3/PPFIA2/ZFPM1/STRADB/ZNF135/ITGB2/DRGX/B4GALT5/FSTL4/CAMK2B/FAT3/SRGAP2/SYNE3/MECP2/MARK2/ZFYVE27/IST…	71
GO:0018130	heterocycle biosynthetic process	257/967	478/1831	0.332933	0.999326	0.999326	WWTR1/IGSF1/SRA1/FMR1/MXD4/ZNF195/IRF4/G3BP2/CAMTA1/PTOV1/ZNF19/NT5E/WTIP/RNF2/RAD50/WWP2/ZNF451/ZNF264/APOBEC3D/TCF4/SP3/SLC38A3/TTC21B/HGF/ACSL3/TP53BP1/PKNOX1/RPTOR/APOBEC3F/ZNF526/ZNF391/RAP2C/RAX/E2F5/KMT2A/GTF3C3/PTPRK/NPM1/WDR43/ZNF286A/ZNF236/TESMIN/YWHAQ/GMEB2/STK16/ZNF362/NFE2L1/TLR4/ZNF493/UBTF/ZNF793/INTS7/SOS1/ZNF546/HOXD3/ZNF383/SYK/ING5/CBX6/FOXL2/ARID1B/L3MBTL4/FPGS/ZNF516/TCEA3/A…	257
GO:0055082	intracellular chemical homeostasis	43/967	77/1831	0.335122	0.999326	0.999326	HTT/SLC24A1/HK1/SLC9A7/SLC38A3/WNT7B/ZNF236/TESMIN/SLC9B2/ATP1B2/BCL2/TTC7A/TIAM1/XCR1/JPH2/ATP6V1B2/THY1/UBE3A/ACE/ADRA2A/ATP2C1/ATP4B/SLC24A4/EPHA5/SOD2/PRKD1/STXBP4/SIRT1/SIN3A/STIM1/CCR5/SLC10A7/SLC4A7/HFE/MCOLN2/SLC11A1/PPARGC1A/ATP2A2/SLC45A2/ANKRD9/ISCU/APLNR/ATP2B4	43
GO:0051603	proteolysis involved in protein catabolic process	57/967	103/1831	0.335192	0.999326	0.999326	WWTR1/CTSC/FMR1/RAD23B/WWP2/ERLEC1/ARMC8/UBE2Z/GNA12/YOD1/VPS36/FAM8A1/UGGT1/CANX/TOLLIP/KBTBD7/FEM1B/CUL4B/PSME3IP1/USP9X/WDR77/UBE3A/FBXL22/UBE2J1/RPGR/DNAJB12/USP44/USP13/RNF150/UGGT2/ATE1/NDFIP2/SH3RF2/FBXW11/FBXO3/TMEM67/SIRT1/SH3RF1/FBXO48/CACUL1/DNAJC10/HDAC6/HFE/UBR1/WDR26/RC3H2/RNF130/TRIM13/ANAPC4/IDE/ANKRD9/UBR3/APPBP2/UBE2G1/KCTD13/SMURF2/PPP2R5C	57
GO:1901565	organonitrogen compound catabolic process	87/967	159/1831	0.3376	0.999326	0.999326	WWTR1/CTSC/FMR1/VIP/NT5E/RAD23B/WWP2/GLDC/APOBEC3D/ERLEC1/ALDH4A1/SPATA18/ARMC8/UBE2Z/APOBEC3F/GNA12/UTP25/YOD1/VPS36/FTCD/FAM8A1/UGGT1/CANX/TOLLIP/KBTBD7/IDO1/ZDHHC2/HGSNAT/FEM1B/CUL4B/PSME3IP1/USP9X/ALDH5A1/WDR77/DPYD/UBE3A/ACE/ADRA2A/SMPDL3B/FBXL22/UBE2J1/RPGR/DNAJB12/USP44/CBLB/USP13/RNF150/UGGT2/ATE1/IDO2/NDFIP2/SH3RF2/ENTPD4/FBXW11/ASAH1/FBXO3/TMEM67/SIRT1/SH3RF1/FBXO48/CACUL1/MDM4/ENPP4/AR…	87
GO:0044270	cellular nitrogen compound catabolic process	30/967	53/1831	0.337663	0.999326	0.999326	FMR1/VIP/NT5E/CAPRIN1/APOBEC3D/APOBEC3F/LRPPRC/METTL3/NPM1/YTHDF1/FOXL2/GRSF1/IDO1/DPYD/AGO1/THRAP3/IDO2/ENTPD4/APAF1/AGO4/PNPT1/ENPP4/RC3H2/TNRC6B/SLC11A1/NCBP1/NCBP2/ZCCHC8/FASTKD1/MLYCD	30
GO:0002285	lymphocyte activation involved in immune response	12/967	20/1831	0.338271	0.999326	0.999326	IRF4/SHB/TP53BP1/KMT2A/TLR4/SHLD2/TNFSF18/ZFPM1/STAT4/RC3H2/SLC11A1/MSH6	12
GO:0007098	centrosome cycle	12/967	20/1831	0.338271	0.999326	0.999326	NPM1/KIAA1614/KIF3A/ALMS1/MCPH1/TMEM67/SIRT1/SSX2IP/POC1B/CCDC102B/RANBP1/MDM1	12
GO:0008361	regulation of cell size	12/967	20/1831	0.338271	0.999326	0.999326	BDNF/RPTOR/SEMA5A/NPM1/PRKD1/MAP3K7/SIN3A/CDKL3/HDAC6/FSTL4/ZFYVE27/IST1	12
GO:0035966	response to topologically incorrect protein	12/967	20/1831	0.338271	0.999326	0.999326	ERLEC1/ABCA7/YOD1/UGGT1/DNAJB14/PTPN1/EIF2AK2/DNAJB12/UGGT2/DNAJC10/TM7SF3/HDAC6	12
GO:0043487	regulation of RNA stability	12/967	20/1831	0.338271	0.999326	0.999326	FMR1/VIP/CAPRIN1/METTL3/NPM1/YTHDF1/THRAP3/PNPT1/RC3H2/TNRC6B/SLC11A1/FASTKD1	12
GO:0044272	sulfur compound biosynthetic process	12/967	20/1831	0.338271	0.999326	0.999326	ACSL3/ST3GAL3/EXTL3/BHMT2/GCDH/SLC10A7/HS2ST1/MAT2B/ANGPT1/MLYCD/ELOVL7/UST	12
GO:0045580	regulation of T cell differentiation	12/967	20/1831	0.338271	0.999326	0.999326	IRF4/SHB/METTL3/BRAF/SOS1/SYK/ARID1B/SH3RF1/TNFSF18/CAMK4/RC3H2/STAT5B	12
GO:0050905	neuromuscular process	12/967	20/1831	0.338271	0.999326	0.999326	CAMTA1/VTI1A/ADARB1/GLRB/PRKD1/KCNA1/TIFAB/SYNM/GRIN3A/ALDH1A3/RBFOX1/MECP2	12
GO:0051170	import into nucleus	12/967	20/1831	0.338271	0.999326	0.999326	SYK/KCNQ3/IPO7/CBLB/ING1/MAVS/PRKD1/HTATIP2/FGF9/ANGPT1/ABRA/SPG11	12
GO:0097553	calcium ion transmembrane import into cytosol	12/967	20/1831	0.338271	0.999326	0.999326	HTT/SLC24A1/BCL2/XCR1/JPH2/THY1/SLC24A4/PRKD1/CCR5/MCOLN2/APLNR/ATP2B4	12
GO:0010646	regulation of cell communication	217/967	403/1831	0.339595	0.999326	0.999326	WWTR1/INSIG1/CTSC/IGSF1/SIRT3/BDNF/FMR1/HTT/MID1/IRF4/SLC24A1/CAMTA1/IFNAR2/WTIP/TBC1D24/CCBE1/SORBS1/WWP2/ZNF451/ERRFI1/HRH1/STAU2/TTC21B/HGF/WNT7B/DYRK2/ABCA7/RPTOR/ARHGAP6/SEMA5A/RICTOR/METTL3/KMT2A/ACP3/GNA12/SNX25/NPM1/SEC14L1/TMEM9B/YTHDF1/SLC9B2/MAP2K6/TLR4/EEF1E1/EPS8/BRAF/CPT1A/SOS1/SLC6A1/BCL2/SYK/ING5/FOXL2/SH3BP4/TIAM1/ADORA3/KCNQ3/EXTL3/NBR1/SPRED1/HEY2/KBTBD7/KDM4C/NECTIN2/WWOX/PTPN…	217
GO:0000041	transition metal ion transport	7/967	11/1831	0.34072	0.999326	0.999326	SLC25A37/ATP2C1/HFE/SLC11A1/ISCU/SFXN1/NECTIN1	7
GO:0001906	cell killing	7/967	11/1831	0.34072	0.999326	0.999326	CTSC/SYK/NECTIN2/STX7/NCR3/HFE/STAT5B	7
GO:0007586	digestion	7/967	11/1831	0.34072	0.999326	0.999326	TLR4/FGF10/SLC22A5/ADRA2A/TIFAB/PPARGC1A/ASAH2	7
GO:0009064	glutamine family amino acid metabolic process	7/967	11/1831	0.34072	0.999326	0.999326	ALDH4A1/FTCD/FPGS/ALDH5A1/ARG2/MECP2/ATP2B4	7
GO:0015748	organophosphate ester transport	7/967	11/1831	0.34072	0.999326	0.999326	ABCA7/ATP8B2/ABCC4/SLC25A16/SLC19A1/ATP9B/SLC25A32	7
GO:0019751	polyol metabolic process	7/967	11/1831	0.34072	0.999326	0.999326	HRH1/INPP4B/IP6K2/ASAH1/SPTLC1/MECP2/ASAH2	7
GO:0031333	negative regulation of protein-containing complex assembly	7/967	11/1831	0.34072	0.999326	0.999326	EPS8/TBCD/THRA/HDAC6/LMOD1/CARD8/ARFGEF1	7
GO:0031507	heterochromatin formation	7/967	11/1831	0.34072	0.999326	0.999326	SETDB2/SMCHD1/JARID2/SIRT1/SIN3A/HMGA2/MECP2	7
GO:0032147	activation of protein kinase activity	7/967	11/1831	0.34072	0.999326	0.999326	ADRA2A/MAP3K7/STRADB/SLC11A1/ANGPT1/MARK2/BORA	7
GO:0033077	T cell differentiation in thymus	7/967	11/1831	0.34072	0.999326	0.999326	BRAF/SOS1/BCL2/TNFRSF9/CAMK4/RABL3/STAT5B	7
GO:0046854	phosphatidylinositol phosphate biosynthetic process	7/967	11/1831	0.34072	0.999326	0.999326	TTC7A/INPP4B/IP6K2/BECN1/FIG4/EFR3A/SOCS2	7
GO:0048477	oogenesis	7/967	11/1831	0.34072	0.999326	0.999326	SHB/METTL3/BCL2/FOXL2/WDR77/MARF1/YTHDC1	7
GO:0048525	negative regulation of viral process	7/967	11/1831	0.34072	0.999326	0.999326	APOBEC3D/APOBEC3F/STAT1/EIF2AK2/MAVS/HMGA2/TRIM13	7
GO:0050435	amyloid-beta metabolic process	7/967	11/1831	0.34072	0.999326	0.999326	PSEN2/ABCA7/GSAP/BECN1/ACE/IFNGR1/IDE	7
GO:0050921	positive regulation of chemotaxis	7/967	11/1831	0.34072	0.999326	0.999326	SEMA5A/TIAM1/FGF10/RIPOR2/PRKD1/TNFSF18/DNM1L	7
GO:0051293	establishment of spindle localization	7/967	11/1831	0.34072	0.999326	0.999326	HTT/SPDL1/GPSM2/SPIRE1/FGF10/MCPH1/FBXW11	7
GO:0051591	response to cAMP	7/967	11/1831	0.34072	0.999326	0.999326	BRAF/STAT1/AQP9/THBD/RAPGEF3/PNPT1/AKAP9	7
GO:0051646	mitochondrion localization	7/967	11/1831	0.34072	0.999326	0.999326	LRPPRC/TRAK2/SPAST/NECTIN2/HDAC6/MARK2/DNM1L	7
GO:0051653	spindle localization	7/967	11/1831	0.34072	0.999326	0.999326	HTT/SPDL1/GPSM2/SPIRE1/FGF10/MCPH1/FBXW11	7
GO:0060260	regulation of transcription initiation by RNA polymerase II	7/967	11/1831	0.34072	0.999326	0.999326	ZNF451/HEY2/CAND1/THRA/TAF3/GTF2A1/MED17	7
GO:0061951	establishment of protein localization to plasma membrane	7/967	11/1831	0.34072	0.999326	0.999326	SYS1/NECTIN3/ACSL3/GORASP2/ZDHHC2/ATP2C1/ARFRP1	7
GO:0071482	cellular response to light stimulus	7/967	11/1831	0.34072	0.999326	0.999326	METTL3/PTPRK/NPM1/CUL4B/SLC24A4/SIRT1/RRH	7
GO:1901019	regulation of calcium ion transmembrane transporter activity	7/967	11/1831	0.34072	0.999326	0.999326	FMR1/HTT/JPH2/ADRA2A/CABP4/STIM1/STIMATE	7
GO:2000514	regulation of CD4-positive, alpha-beta T cell activation	7/967	11/1831	0.34072	0.999326	0.999326	IRF4/SHB/CBLB/SH3RF1/TNFSF18/ARG2/RC3H2	7
GO:0034976	response to endoplasmic reticulum stress	24/967	42/1831	0.341151	0.999326	0.999326	AFF4/ERLEC1/ABCA7/GORASP2/YOD1/FAM8A1/UGGT1/BCL2/CANX/PTPN1/EIF2AK2/UBE2J1/DNAJB12/USP13/UGGT2/APAF1/TMEM67/SIRT1/DNAJC10/NIBAN1/PDIA4/TRIM13/ATP2A2/TMX1	24
GO:0050708	regulation of protein secretion	18/967	31/1831	0.342514	0.999326	0.999326	SIRT3/SLC9B2/TLR4/CPT1A/TIAM1/ADRA2A/STXBP5/RFX3/EPHA5/RAB11FIP3/CAPN10/TFAP2B/STXBP4/RAB11FIP1/TM7SF3/DOC2B/GNAZ/DNM1L	18
GO:0044770	cell cycle phase transition	31/967	55/1831	0.346069	0.999326	0.999326	ATRIP/KLHL18/RAD50/TP53BP1/SPDL1/RPTOR/NPM1/SPAST/INTS7/EPS8/BCL2/ARID1B/TOPBP1/KHDRBS1/FGF10/FEM1B/CUL4B/PINX1/NEK10/USP44/RBL1/TMEM14B/WDR76/STXBP4/E2F6/SIN3A/CACUL1/ANAPC4/MECP2/GFI1/ATP2B4	31
GO:1901361	organic cyclic compound catabolic process	31/967	55/1831	0.346069	0.999326	0.999326	FMR1/VIP/NT5E/CAPRIN1/APOBEC3D/ALDH4A1/APOBEC3F/LRPPRC/METTL3/NPM1/YTHDF1/FOXL2/GRSF1/IDO1/DPYD/AGO1/THRAP3/IDO2/ENTPD4/APAF1/AGO4/PNPT1/ENPP4/RC3H2/TNRC6B/SLC11A1/NCBP1/NCBP2/ZCCHC8/FASTKD1/MLYCD	31
GO:0060271	cilium assembly	25/967	44/1831	0.350884	0.999326	0.999326	WWTR1/TTBK2/HTT/TTC21B/BBOF1/CC2D2B/ABCC4/WDR35/KIF3A/TMEM107/IFT22/PTPDC1/RPGR/RFX3/GORAB/RAB11FIP3/RABL2B/TMEM67/JHY/SSX2IP/CCDC65/HDAC6/POC1B/DNHD1/DNAAF11	25
GO:0009056	catabolic process	163/967	302/1831	0.352566	0.999326	0.999326	WWTR1/CTSC/FMR1/HTT/VIP/NT5E/CAPRIN1/HK1/RAD23B/WWP2/GLDC/APOBEC3D/VTI1A/ERLEC1/ALDH4A1/SPATA18/HGF/ARMC8/UBE2Z/EXOC7/ABCA7/ETFBKMT/RPTOR/APOBEC3F/LRPPRC/METTL3/GNA12/SNX25/NPM1/SPATA33/YTHDF1/RAB33B/UTP25/YOD1/VPS36/CPT1A/FTCD/FAM8A1/UGGT1/BCL2/FOXL2/SH3BP4/CANX/NBR1/TOLLIP/GRSF1/KBTBD7/ATP6V1B2/IDO1/PTPN1/ACAD10/ZDHHC2/THRA/HGSNAT/SNX18/FEM1B/CUL4B/BECN1/PSME3IP1/USP9X/ALDH5A1/WDR77/RNF152/DPYD…	163
GO:0010721	negative regulation of cell development	13/967	22/1831	0.354248	0.999326	0.999326	SHB/SEMA5A/TLR4/THY1/PTHLH/TNFSF18/CDKL3/HDAC6/ZFPM1/RC3H2/FSTL4/MECP2/FRZB	13
GO:0030073	insulin secretion	13/967	22/1831	0.354248	0.999326	0.999326	SIRT3/SLC9B2/CPT1A/TIAM1/ADRA2A/RFX3/EPHA5/CAPN10/TFAP2B/STXBP4/TM7SF3/DOC2B/GNAZ	13
GO:0034219	carbohydrate transmembrane transport	13/967	22/1831	0.354248	0.999326	0.999326	SORBS1/BRAF/AQP9/ACE/SLC1A2/CAPN10/STXBP4/SLC5A2/ASPSCR1/MFSD4A/SLC2A11/SLC45A2/SLC2A12	13
GO:0044242	cellular lipid catabolic process	13/967	22/1831	0.354248	0.999326	0.999326	ETFBKMT/CPT1A/ACAD10/SMPDL3B/BCO1/PLD1/AIG1/ASAH1/GCDH/ABHD12B/ENPP6/MLYCD/ASAH2	13
GO:0044843	cell cycle G1/S phase transition	13/967	22/1831	0.354248	0.999326	0.999326	RPTOR/BCL2/ARID1B/KHDRBS1/FGF10/CUL4B/RBL1/TMEM14B/STXBP4/E2F6/CACUL1/GFI1/ATP2B4	13
GO:0048469	cell maturation	13/967	22/1831	0.354248	0.999326	0.999326	SHB/FAM210B/BCL2/KCNQ3/BRD1/FEM1B/WDR77/TFCP2L1/RFX3/CATSPERE/ADGRB3/B4GALT5/MECP2	13
GO:0050796	regulation of insulin secretion	13/967	22/1831	0.354248	0.999326	0.999326	SIRT3/SLC9B2/CPT1A/TIAM1/ADRA2A/RFX3/EPHA5/CAPN10/TFAP2B/STXBP4/TM7SF3/DOC2B/GNAZ	13
GO:0051701	biological process involved in interaction with host	13/967	22/1831	0.354248	0.999326	0.999326	NECTIN3/WWP2/EXOC7/NECTIN2/BECN1/CD209/EXOC2/CCR5/IDE/IST1/NECTIN1/NCAM1/THOC3	13
GO:0072006	nephron development	13/967	22/1831	0.354248	0.999326	0.999326	WWTR1/WNT7B/BCL2/STAT1/ASXL1/HEYL/TFAP2B/FMN1/COL4A4/ITGA3/HS2ST1/SULF1/ANGPT1	13
GO:0007163	establishment or maintenance of cell polarity	19/967	33/1831	0.354366	0.999326	0.999326	HTT/WNT7B/SPDL1/RICTOR/MPP7/KIAA1614/GPSM2/FGF10/MCPH1/WWC1/MAP7/WDR1/FBXW11/RIPOR2/ERBIN/MARK2/ARFGEF1/LIN7A/UST	19
GO:0042326	negative regulation of phosphorylation	19/967	33/1831	0.354366	0.999326	0.999326	WWTR1/ERRFI1/HGF/NPM1/ADARB1/SPRED1/PTPN1/THY1/IPO7/GPD1L/CBLB/PTPRQ/SIRT1/GPRC5A/DNAJC10/NIBAN1/SNX6/ANGPT1/RGS2	19
GO:0006163	purine nucleotide metabolic process	26/967	46/1831	0.36021	0.999326	0.999326	NT5E/ACSL3/RPTOR/KCNAB2/HMGCS1/ATP6V1B2/IDO1/SLC25A16/GPD1L/NAXD/IDO2/ENTPD4/PTHLH/GCDH/AK4/SLC4A7/FMO5/SULT1A1/PRPS1/SLC25A13/PPARGC1A/ME2/DNM1L/NADSYN1/MLYCD/ELOVL7	26
GO:0006914	autophagy	40/967	72/1831	0.36202	0.999326	0.999326	HTT/VTI1A/SPATA18/HGF/EXOC7/RPTOR/SPATA33/RAB33B/YOD1/VPS36/BCL2/SH3BP4/NBR1/TOLLIP/ATP6V1B2/SNX18/BECN1/RNF152/VPS41/SNX7/USP13/PRKD1/ATG4C/MAP3K7/SIRT1/EPM2A/HUWE1/VTA1/PLEKHM1/HDAC6/SPTLC1/SNX6/TRIM13/ATP2A2/SYT11/RETREG1/MARK2/DNM1L/SPG11/AP4M1	40
GO:0061919	process utilizing autophagic mechanism	40/967	72/1831	0.36202	0.999326	0.999326	HTT/VTI1A/SPATA18/HGF/EXOC7/RPTOR/SPATA33/RAB33B/YOD1/VPS36/BCL2/SH3BP4/NBR1/TOLLIP/ATP6V1B2/SNX18/BECN1/RNF152/VPS41/SNX7/USP13/PRKD1/ATG4C/MAP3K7/SIRT1/EPM2A/HUWE1/VTA1/PLEKHM1/HDAC6/SPTLC1/SNX6/TRIM13/ATP2A2/SYT11/RETREG1/MARK2/DNM1L/SPG11/AP4M1	40
GO:1901362	organic cyclic compound biosynthetic process	261/967	487/1831	0.363381	0.999326	0.999326	WWTR1/INSIG1/IGSF1/SRA1/FMR1/MXD4/ZNF195/IRF4/G3BP2/CAMTA1/PTOV1/ZNF19/NT5E/WTIP/RNF2/RAD50/WWP2/ZNF451/ZNF264/APOBEC3D/TCF4/SP3/SLC38A3/TTC21B/HGF/ACSL3/TP53BP1/PKNOX1/RPTOR/APOBEC3F/ZNF526/ZNF391/RAP2C/RAX/E2F5/KMT2A/GTF3C3/PTPRK/NPM1/WDR43/ZNF286A/ZNF236/TESMIN/YWHAQ/GMEB2/STK16/ZNF362/NFE2L1/TLR4/ZNF493/HMGCS1/UBTF/ZNF793/INTS7/SOS1/ZNF546/HOXD3/ZNF383/SYK/ING5/CBX6/FOXL2/ARID1B/L3MBTL4/FPGS/…	261
GO:0002708	positive regulation of lymphocyte mediated immunity	8/967	13/1831	0.364375	0.999326	0.999326	TP53BP1/SHLD2/NECTIN2/STX7/NCR3/MAP3K7/HFE/STAT5B	8
GO:0006367	transcription initiation at RNA polymerase II promoter	8/967	13/1831	0.364375	0.999326	0.999326	ZNF451/HEY2/CAND1/THRA/TAF3/PPARGC1A/GTF2A1/MED17	8
GO:0032602	chemokine production	8/967	13/1831	0.364375	0.999326	0.999326	TLR4/SYK/EIF2AK2/ERBIN/MAVS/ARG2/ZFPM1/MCOLN2	8
GO:0032642	regulation of chemokine production	8/967	13/1831	0.364375	0.999326	0.999326	TLR4/SYK/EIF2AK2/ERBIN/MAVS/ARG2/ZFPM1/MCOLN2	8
GO:0042116	macrophage activation	8/967	13/1831	0.364375	0.999326	0.999326	CTSC/TLR4/SYK/IFNGR1/TMEM229B/ITGB2/SLC11A1/SYT11	8
GO:0048534	hematopoietic or lymphoid organ development	8/967	13/1831	0.364375	0.999326	0.999326	KMT2A/BRAF/BCL2/FGF10/ASXL1/JARID2/RC3H2/STAT5B	8
GO:0071326	cellular response to monosaccharide stimulus	8/967	13/1831	0.364375	0.999326	0.999326	ZNF236/SLC9B2/TIAM1/ACE/ADRA2A/EPHA5/STXBP4/SIN3A	8
GO:0071331	cellular response to hexose stimulus	8/967	13/1831	0.364375	0.999326	0.999326	ZNF236/SLC9B2/TIAM1/ACE/ADRA2A/EPHA5/STXBP4/SIN3A	8
GO:0071333	cellular response to glucose stimulus	8/967	13/1831	0.364375	0.999326	0.999326	ZNF236/SLC9B2/TIAM1/ACE/ADRA2A/EPHA5/STXBP4/SIN3A	8
GO:1901264	carbohydrate derivative transport	8/967	13/1831	0.364375	0.999326	0.999326	ABCC4/SLC25A16/SLC19A1/SLC35A5/SLC5A2/SLC29A4/SLC10A7/SLC35A3	8
GO:1904375	regulation of protein localization to cell periphery	8/967	13/1831	0.364375	0.999326	0.999326	SORBS1/ACSL3/GPSM2/ZDHHC2/ATP2C1/STX7/ITGA3/ATP2B4	8
GO:0006520	amino acid metabolic process	20/967	35/1831	0.365531	0.999326	0.999326	YARS1/GATB/GLDC/ALDH4A1/FTCD/FPGS/IDO1/TPH1/ALDH5A1/DPYD/DHFR2/BHMT2/IDO2/GCDH/ARG2/FARSB/SLC25A13/SLC45A2/MECP2/ATP2B4	20
GO:0002440	production of molecular mediator of immune response	14/967	24/1831	0.368787	0.999326	0.999326	HK1/TP53BP1/TLR4/SYK/SHLD2/UBE2J1/MAVS/MAP3K7/SIRT1/HFE/ANGPT1/NHEJ1/GPRC5B/MSH6	14
GO:0002520	immune system development	14/967	24/1831	0.368787	0.999326	0.999326	TP53BP1/KMT2A/BRAF/BCL2/SHLD2/IDO1/FGF10/ASXL1/CBLB/JARID2/RC3H2/NHEJ1/STAT5B/MSH6	14
GO:0046631	alpha-beta T cell activation	14/967	24/1831	0.368787	0.999326	0.999326	IRF4/SHB/KMT2A/BRAF/BCL2/SYK/CBLB/SH3RF1/TNFSF18/ARG2/ZFPM1/STAT4/HFE/RC3H2	14
GO:0071695	anatomical structure maturation	14/967	24/1831	0.368787	0.999326	0.999326	SHB/FAM210B/BCL2/KCNQ3/BRD1/FEM1B/WDR77/TFCP2L1/RFX3/SLC24A4/CATSPERE/ADGRB3/B4GALT5/MECP2	14
GO:0007017	microtubule-based process	71/967	130/1831	0.368977	0.999326	0.999326	TTBK2/HTT/MID1/STAU2/TTC21B/SPDL1/LRPPRC/TRAK2/NPM1/SLC9B2/BICD2/SPAST/AP3B2/TBCD/KIAA1614/GPSM2/KATNAL2/SPIRE1/WDR35/DYNC1LI2/KIF3A/ALMS1/FGF10/IFT22/MCPH1/KLC1/BICDL1/NEK10/MAP7/KIF16B/KIF15/RPGR/SPG7/RFX3/CCDC8/FBXW11/TMEM108/RABL2B/TRIM36/TMEM67/SIRT1/MPDZ/JHY/STARD9/CATSPERE/SSX2IP/CCDC65/HDAC6/TRIM54/POC1B/DIXDC1/CCDC102B/MAP10/ATXN7/AP3M2/NAV1/DNHD1/RANBP1/AKAP9/SRGAP2/MECP2/NETO1/MDM1/MAR…	71
GO:0002697	regulation of immune effector process	21/967	37/1831	0.376083	0.999326	0.999326	IRF4/HK1/SHB/TP53BP1/TLR4/SYK/SHLD2/NECTIN2/UBE2J1/STX7/NCR3/MAVS/MAP3K7/SIRT1/TNFSF18/HFE/ITGB2/RC3H2/ANGPT1/STAT5B/GPRC5B	21
GO:0006814	sodium ion transport	21/967	37/1831	0.376083	0.999326	0.999326	SLC24A1/SLC9A7/SLC38A3/SLC9B2/ATP1B2/SLC6A1/NKAIN3/SLC22A5/GPD1L/ATP4B/SLC24A4/WNK2/SLC6A6/SHROOM2/SLC5A2/SLC6A13/SLC10A7/SLC4A7/NETO1/SLC20A1/ATP2B4	21
GO:0009887	animal organ morphogenesis	65/967	119/1831	0.377399	0.999326	0.999326	WWTR1/INSIG1/NECTIN3/ERRFI1/STAU2/SP3/ANKRD11/HGF/WNT7B/RAB33B/BRAF/SOS1/HOXD3/BCL2/SYK/FOXL2/ADARB1/TIAM1/HEY2/SETDB2/WWOX/IRX5/TMEM107/FGF10/THRA/ABCC9/HOXB8/STAT1/THY1/FEM1B/HOXA4/ASXL1/WHRN/HEYL/WDR48/SLC24A4/FBXW11/GCNT1/MMP13/TFAP2B/SHROOM2/FMN1/JHY/TIFAB/FZD1/MDM4/CABP4/STIM1/ZFPM1/HS2ST1/DZANK1/FGF9/MMP16/TIPARP/ALDH1A3/PRICKLE2/TMEM215/SULF1/FAT3/FRZB/NECTIN1/APLNR/MYO3B/STX2/SMURF2	65
GO:0002757	immune response-activating signaling pathway	28/967	50/1831	0.377763	0.999326	0.999326	IRF4/SHB/SEC14L1/MAP2K6/TLR4/BRAF/SOS1/BCL2/SYK/KHDRBS1/NECTIN2/IGHG3/IRAK4/THY1/EIF2AK2/SMPDL3B/USP50/CBLB/NCR3/ERBIN/MAVS/PRKD1/MAP3K7/RC3H2/GCSAM/CARD8/GFI1/IKBKB	28
GO:0034655	nucleobase-containing compound catabolic process	28/967	50/1831	0.377763	0.999326	0.999326	FMR1/VIP/NT5E/CAPRIN1/APOBEC3D/APOBEC3F/LRPPRC/METTL3/NPM1/YTHDF1/FOXL2/GRSF1/DPYD/AGO1/THRAP3/ENTPD4/APAF1/AGO4/PNPT1/ENPP4/RC3H2/TNRC6B/SLC11A1/NCBP1/NCBP2/ZCCHC8/FASTKD1/MLYCD	28
GO:0008544	epidermis development	15/967	26/1831	0.382125	0.999326	0.999326	ERRFI1/SOS1/BCL2/EXTL3/HEY2/FGF10/ATP2C1/WHRN/GORAB/ASAH1/PTHLH/POU2F3/SLC4A7/ATP2A2/KAZN	15
GO:0046578	regulation of Ras protein signal transduction	15/967	26/1831	0.382125	0.999326	0.999326	EPS8/KBTBD7/FGF10/GIT2/ARFGAP1/RIPOR2/SSX2IP/ITGA3/GPR65/RABL3/STARD13/ABRA/ARFGEF1/NET1/KCTD13	15
GO:0051091	positive regulation of DNA-binding transcription factor activity	15/967	26/1831	0.382125	0.999326	0.999326	TP53BP1/NPM1/TLR4/EIF2AK2/TRIM52/EPHA5/MAVS/PRKD1/FZD1/SLCO3A1/TNFSF18/TRIM13/PPARGC1A/ABRA/IKBKB	15
GO:0061025	membrane fusion	15/967	26/1831	0.382125	0.999326	0.999326	VIPAS39/VTI1A/VAMP4/NECTIN2/VPS41/STX7/STX18/HUWE1/PLEKHM1/DOC2B/SYT11/VCPIP1/DNM1L/STX2/SPG11	15
GO:1903828	negative regulation of protein localization	15/967	26/1831	0.382125	0.999326	0.999326	TTBK2/INSIG1/WWP2/ERLEC1/YOD1/ACTN2/ADRA2A/UBE2J1/RAB11FIP3/NDFIP2/RIPOR2/RAB11FIP1/SIN3A/GNAZ/ANGPT1	15
GO:0002695	negative regulation of leukocyte activation	9/967	15/1831	0.38435	0.999326	0.999326	IDO1/TNFRSF13B/CBLB/RIPOR2/TNFSF18/ARG2/HFE/RC3H2/SYT11	9
GO:0002702	positive regulation of production of molecular mediator of immune response	9/967	15/1831	0.38435	0.999326	0.999326	HK1/TP53BP1/TLR4/SYK/SHLD2/MAVS/MAP3K7/SIRT1/GPRC5B	9
GO:0010821	regulation of mitochondrion organization	9/967	15/1831	0.38435	0.999326	0.999326	MFF/HTT/HGF/SPIRE1/HUWE1/MIEF1/HDAC6/PPARGC1A/DNM1L	9
GO:0016079	synaptic vesicle exocytosis	9/967	15/1831	0.38435	0.999326	0.999326	FMR1/BRAF/STXBP5/DNAJC5/PPFIA2/DOC2B/ATP2A2/SYT11/STX2	9
GO:0019362	pyridine nucleotide metabolic process	9/967	15/1831	0.38435	0.999326	0.999326	RPTOR/KCNAB2/IDO1/GPD1L/NAXD/IDO2/FMO5/ME2/NADSYN1	9
GO:0030509	BMP signaling pathway	9/967	15/1831	0.38435	0.999326	0.999326	USP9X/TFAP2B/FZD1/ITGA3/HFE/FSTL4/SULF1/PPM1A/SMURF2	9
GO:0031109	microtubule polymerization or depolymerization	9/967	15/1831	0.38435	0.999326	0.999326	TTBK2/MID1/SPAST/TBCD/HDAC6/TRIM54/ATXN7/AKAP9/MECP2	9
GO:0043534	blood vessel endothelial cell migration	9/967	15/1831	0.38435	0.999326	0.999326	VASH1/SPRED1/PRKD1/SIRT1/STARD13/ANGPT1/MECP2/STAT5A/ATP2B4	9
GO:0043535	regulation of blood vessel endothelial cell migration	9/967	15/1831	0.38435	0.999326	0.999326	VASH1/SPRED1/PRKD1/SIRT1/STARD13/ANGPT1/MECP2/STAT5A/ATP2B4	9
GO:0045834	positive regulation of lipid metabolic process	9/967	15/1831	0.38435	0.999326	0.999326	SIRT3/SORBS1/ACSL3/RPTOR/CPT1A/PRKD1/PPARGC1A/HULC/MLYCD	9
GO:0046496	nicotinamide nucleotide metabolic process	9/967	15/1831	0.38435	0.999326	0.999326	RPTOR/KCNAB2/IDO1/GPD1L/NAXD/IDO2/FMO5/ME2/NADSYN1	9
GO:0046634	regulation of alpha-beta T cell activation	9/967	15/1831	0.38435	0.999326	0.999326	IRF4/SHB/SYK/CBLB/SH3RF1/TNFSF18/ARG2/HFE/RC3H2	9
GO:0046822	regulation of nucleocytoplasmic transport	9/967	15/1831	0.38435	0.999326	0.999326	MX2/KHDRBS1/MAVS/UHMK1/PRKD1/RAPGEF3/ANGPT1/NCBP2/PPM1A	9
GO:0048593	camera-type eye morphogenesis	9/967	15/1831	0.38435	0.999326	0.999326	NECTIN3/SP3/THY1/TFAP2B/SHROOM2/CABP4/ALDH1A3/FAT3/NECTIN1	9
GO:0048706	embryonic skeletal system development	9/967	15/1831	0.38435	0.999326	0.999326	SP3/HOXD3/IRX5/HOXB8/HOXA4/HOXC6/FGF9/MMP16/SULF1	9
GO:0051092	positive regulation of NF-kappaB transcription factor activity	9/967	15/1831	0.38435	0.999326	0.999326	NPM1/TLR4/EIF2AK2/TRIM52/PRKD1/SLCO3A1/TNFSF18/TRIM13/IKBKB	9
GO:0072524	pyridine-containing compound metabolic process	9/967	15/1831	0.38435	0.999326	0.999326	RPTOR/KCNAB2/IDO1/GPD1L/NAXD/IDO2/FMO5/ME2/NADSYN1	9
GO:1990823	response to leukemia inhibitory factor	9/967	15/1831	0.38435	0.999326	0.999326	GLDC/EEF1E1/EPS8/WDR35/ADAM23/NFYB/EFHC2/JARID2/SIRT1	9
GO:1990830	cellular response to leukemia inhibitory factor	9/967	15/1831	0.38435	0.999326	0.999326	GLDC/EEF1E1/EPS8/WDR35/ADAM23/NFYB/EFHC2/JARID2/SIRT1	9
GO:0002764	immune response-regulating signaling pathway	29/967	52/1831	0.386045	0.999326	0.999326	IRF4/SHB/SEC14L1/MAP2K6/TLR4/BRAF/SOS1/BCL2/SYK/KHDRBS1/NECTIN2/IGHG3/IRAK4/THY1/EIF2AK2/SMPDL3B/USP50/MAPK10/CBLB/NCR3/ERBIN/MAVS/PRKD1/MAP3K7/RC3H2/GCSAM/CARD8/GFI1/IKBKB	29
GO:0030334	regulation of cell migration	59/967	108/1831	0.38634	0.999326	0.999326	TTBK2/TBC1D24/CCBE1/RIN3/HGF/GAB1/RAP2C/SEMA5A/PTPRK/GNA12/TLR4/ATP1B2/VASH1/BRAF/BCL2/ADARB1/ARPIN/TIAM1/ADORA3/SPRED1/TCAF1/FGF10/THY1/ZNF268/ACE/ADRA2A/ZEB2/NEXN/FRMD5/ING1/SH3RF2/RIPOR2/GCNT1/SOD2/PRKD1/MEAK7/MAP3K7/SIRT1/SIN3A/TNFSF18/ITGA3/HDAC6/MITF/STK10/FGF9/GCSAM/SINHCAF/RBBP7/SULF1/STARD13/CAMK2B/ANGPT1/SRGAP2/MECP2/STAT5A/DNM1L/CASS4/ATP2B4/SMURF2	59
GO:0044248	cellular catabolic process	99/967	183/1831	0.386666	0.999326	0.999326	FMR1/HTT/VIP/NT5E/CAPRIN1/GLDC/APOBEC3D/VTI1A/ALDH4A1/SPATA18/HGF/EXOC7/ABCA7/ETFBKMT/RPTOR/APOBEC3F/LRPPRC/METTL3/SNX25/NPM1/SPATA33/YTHDF1/RAB33B/YOD1/VPS36/CPT1A/FTCD/BCL2/FOXL2/SH3BP4/NBR1/TOLLIP/GRSF1/ATP6V1B2/IDO1/PTPN1/ACAD10/HGSNAT/SNX18/BECN1/ALDH5A1/RNF152/DPYD/ACE/ADRA2A/KIF16B/SMPDL3B/BCO1/AGO1/THRAP3/VPS41/SNX7/PLD1/USP13/IDO2/ENTPD4/PRKD1/AIG1/ASAH1/ATG4C/APAF1/MAP3K7/SIRT1/EPM2A/GC…	99
GO:0007420	brain development	44/967	80/1831	0.388137	0.999326	0.999326	TTBK2/TTC21B/WNT7B/SEMA5A/METTL3/RAX/AFF2/YWHAQ/ATP1B2/SOS1/BCL2/KDM6B/FGF10/MCPH1/UBE3A/WDR89/WHRN/GIT2/TMEM14B/MACO1/EPHA5/SLC1A2/FBXW11/TMEM108/FOXB1/TOP2B/SHROOM2/KCNA1/APAF1/JHY/FZD1/SIN3A/DIXDC1/FGF9/FAT4/ALDH1A3/RBBP7/SRGAP2/MECP2/ATP2B4/ATXN1/FUT10/CCDC14/C21orf91	44
GO:0019439	aromatic compound catabolic process	30/967	54/1831	0.394029	0.999326	0.999326	FMR1/VIP/NT5E/CAPRIN1/APOBEC3D/APOBEC3F/LRPPRC/METTL3/NPM1/YTHDF1/FOXL2/GRSF1/IDO1/DPYD/AGO1/THRAP3/IDO2/ENTPD4/APAF1/AGO4/PNPT1/ENPP4/RC3H2/TNRC6B/SLC11A1/NCBP1/NCBP2/ZCCHC8/FASTKD1/MLYCD	30
GO:0002699	positive regulation of immune effector process	16/967	28/1831	0.394444	0.999326	0.999326	HK1/SHB/TP53BP1/TLR4/SYK/SHLD2/NECTIN2/STX7/NCR3/MAVS/MAP3K7/SIRT1/HFE/ITGB2/STAT5B/GPRC5B	16
GO:0031032	actomyosin structure organization	16/967	28/1831	0.394444	0.999326	0.999326	SORBS1/ARHGAP6/BRAF/ACTN2/ALMS1/WDR1/RHPN2/ZEB2/FRMD5/PRKD1/RAPGEF3/EPB41L3/GPR65/LMOD1/ANKRD23/KCTD13	16
GO:0044403	biological process involved in symbiotic interaction	16/967	28/1831	0.394444	0.999326	0.999326	NECTIN3/FMR1/WWP2/EXOC7/NECTIN2/BECN1/CD209/EXOC2/POU2F3/HMGA2/CCR5/IDE/IST1/NECTIN1/NCAM1/THOC3	16
GO:0045055	regulated exocytosis	16/967	28/1831	0.394444	0.999326	0.999326	FMR1/BRAF/SYK/ABCC4/TPH1/ADRA2A/SYT6/STXBP5/RAB11FIP1/DNAJC5/PPFIA2/ITGB2/DOC2B/ATP2A2/SYT11/STX2	16
GO:0051047	positive regulation of secretion	16/967	28/1831	0.394444	0.999326	0.999326	SIRT3/VIP/ACSL3/MAP2K6/TLR4/SLC6A1/SYK/FOXL2/STXBP5/CAPN10/PRKD1/TM7SF3/HFE/ITGB2/DOC2B/DNM1L	16
GO:1903825	organic acid transmembrane transport	16/967	28/1831	0.394444	0.999326	0.999326	SLC38A3/SLC7A6/CPT1A/SLC16A7/SLC19A1/SLC6A6/SLC1A2/SLC6A13/SFXN2/SLC29A4/SLC16A9/SLC25A13/SLC11A1/SLC25A32/RGS2/SFXN1	16
GO:0045944	positive regulation of transcription by RNA polymerase II	85/967	157/1831	0.396068	0.999326	0.999326	WWTR1/IRF4/CAMTA1/PTOV1/WWP2/TCF4/SP3/SLC38A3/HGF/TP53BP1/PKNOX1/RAX/KMT2A/NPM1/GMEB2/STK16/TLR4/ZNF493/HOXD3/FOXL2/ZNF208/HEY2/KDM6B/KDM4C/CAND1/WWOX/ELK4/FGF10/THRA/STAT1/ETV5/ETV6/ZNF268/ZNF300/HOXA4/UBE3A/ASXL1/AGO1/THRAP3/FHL5/HEYL/ZEB2/NFYB/ZNF507/TFCP2L1/RFX3/ZNF197/TFAP2B/MAVS/PRKD1/MOSPD1/PRDM10/SIRT1/SETX/TRERF1/POU2F3/HMGA2/ZFPM1/MITF/TCF20/STAT4/HTATIP2/GABPB1/ZNF395/TAF3/KAT6B/ZNF292…	85
GO:0032989	cellular component morphogenesis	61/967	112/1831	0.396653	0.999326	0.999326	MFF/BDNF/CAPRIN1/TBC1D24/STAU2/WNT7B/SEMA5A/YTHDF1/SPAST/BRAF/SOS1/ENAH/BCL2/ADARB1/ARPIN/TIAM1/SNX1/ACTN2/CCDC136/NECTIN2/THY1/KALRN/USP9X/FIG4/WDR1/NEXN/EPHA5/TMEM108/FOXB1/PRKD1/TOP2B/ST8SIA2/ZDHHC17/SIN3A/PNPT1/SULT4A1/TANC2/EPB41L3/CDKL3/HDAC6/ADGRB3/PPFIA2/LMOD1/DRGX/B4GALT5/FSTL4/CAMK2B/ANKRD23/SRGAP2/MECP2/MARK2/ZFYVE27/IST1/NECTIN1/NCAM1/DNM1L/UST/ETV1/SS18L1/SPG11/AGFG1	61
GO:0040012	regulation of locomotion	61/967	112/1831	0.396653	0.999326	0.999326	TTBK2/TBC1D24/CCBE1/RIN3/HGF/GAB1/RAP2C/SEMA5A/PTPRK/GNA12/YTHDF1/TLR4/ATP1B2/VASH1/BRAF/BCL2/ADARB1/ARPIN/TIAM1/ADORA3/SPRED1/TCAF1/FGF10/THY1/ZNF268/ACE/ADRA2A/ZEB2/NEXN/FRMD5/ING1/SH3RF2/RIPOR2/GCNT1/SOD2/PRKD1/MEAK7/MAP3K7/SIRT1/SIN3A/TNFSF18/SSX2IP/ITGA3/HDAC6/MITF/STK10/FGF9/GCSAM/SINHCAF/RBBP7/SULF1/STARD13/CAMK2B/ANGPT1/SRGAP2/MECP2/STAT5A/DNM1L/CASS4/ATP2B4/SMURF2	61
GO:0098660	inorganic ion transmembrane transport	61/967	112/1831	0.396653	0.999326	0.999326	FMR1/HTT/SLC24A1/WWP2/SLC9A7/SLC25A37/PSEN2/KCNAB2/SLC9B2/ATP1B2/SLC6A1/ANO5/BCL2/GLRB/KCNQ3/ACTN2/XCR1/JPH2/ATP6V1B2/ABCC9/THY1/GABRA2/ADRA2A/ATP2C1/GPD1L/ATP4B/NCS1/SLC24A4/WNK2/SLC6A6/GABRR2/PRKD1/SHROOM2/KCNA1/KCNJ13/SLC5A2/SLC6A13/TRPM6/CABP4/STIM1/CCR5/SLC4A7/HFE/GRIN3A/KCNQ5/MCOLN2/SLC25A13/SLC11A1/ATP2A2/KCNN3/KCNT2/AKAP9/NETO1/ISCU/UBR3/SLC20A1/KCNC4/APLNR/ATP2B4/STIMATE/KCNJ5	61
GO:0040011	locomotion	69/967	127/1831	0.396826	0.999326	0.999326	TTBK2/TBC1D24/CCBE1/RIN3/HGF/GAB1/RAP2C/SEMA5A/PTPRK/GNA12/YTHDF1/TLR4/ATP1B2/VASH1/BRAF/BCL2/SYK/ADARB1/ARPIN/TIAM1/ADORA3/SPRED1/XCR1/TCAF1/FGF10/THY1/ZNF268/WDR1/ACE/ADRA2A/ZEB2/PLD1/NEXN/FRMD5/MACO1/ING1/SH3RF2/RIPOR2/GCNT1/SOD2/PRKD1/MEAK7/MAP3K7/SIRT1/SIN3A/TNFSF18/SSX2IP/ITGA3/ACKR2/HDAC6/CCR5/MITF/STK10/ITGB2/FGF9/GCSAM/SINHCAF/RBBP7/SULF1/STARD13/CAMK2B/ANGPT1/SRGAP2/MECP2/STAT5A/DNM1L/C…	69
GO:0051173	positive regulation of nitrogen compound metabolic process	187/967	349/1831	0.397589	0.999326	0.999326	WWTR1/CTSC/SRA1/SIRT3/BDNF/FMR1/IRF4/VIP/CAMTA1/PTOV1/CAPRIN1/CCBE1/RAD50/WWP2/SLC25A37/TCF4/SP3/SLC38A3/HGF/ACSL3/TP53BP1/PKNOX1/RPTOR/RAP2C/RICTOR/METTL3/RAX/E2F5/KMT2A/GNA12/NPM1/WDR43/YTHDF1/GMEB2/STK16/MAP2K6/TLR4/ZNF493/UBTF/BRAF/HOXD3/BCL2/SYK/FOXL2/ARID1B/GSAP/ZNF516/SHLD2/IP6K2/TOLLIP/ZNF208/KHDRBS1/ACTN2/GRSF1/SPIRE1/HEY2/KDM6B/KDM4C/CAND1/WWOX/ELK4/PTPN1/FGF10/THRA/STAT1/WWC1/CUL4B/ZNF…	187
GO:0097435	supramolecular fiber organization	46/967	84/1831	0.400336	0.999326	0.999326	TTBK2/MID1/VIPAS39/SORBS1/ARHGAP6/SEMA5A/RICTOR/FCHSD1/TPM4/SPAST/SERF1B/EPS8/BRAF/TBCD/ENAH/BCL2/ARPIN/KATNAL2/ACTN2/SPIRE1/ALMS1/USP9X/WDR1/RHPN2/ARPC5L/ZEB2/PRKD1/SHROOM2/FMN1/RAPGEF3/GPR65/WHAMM/HDAC6/TRIM54/LMOD1/MAP10/ATXN7/ARHGAP40/AKAP9/TLL1/ANKRD23/MECP2/ARFGEF1/KCTD13/VBP1/AGFG1	46
GO:0003341	cilium movement	10/967	17/1831	0.401624	0.999326	0.999326	SLC9B2/NEK10/RFX3/JHY/CATSPERE/CCDC65/DNHD1/DNAAF11/ATP2B4/DNAH9	10
GO:0006006	glucose metabolic process	10/967	17/1831	0.401624	0.999326	0.999326	HK1/SORBS1/DYRK2/CPT1A/HECTD4/TFAP2B/SIRT1/SLC25A13/PPARGC1A/MLYCD	10
GO:0006493	protein O-linked glycosylation	10/967	17/1831	0.401624	0.999326	0.999326	ST3GAL3/B3GLCT/GCNT1/POFUT1/POMT1/FUT5/GALNT7/B4GALT5/POGLUT1/C1GALT1	10
GO:0030307	positive regulation of cell growth	10/967	17/1831	0.401624	0.999326	0.999326	BDNF/RPTOR/SEMA5A/RICTOR/BCL2/EXTL3/NCBP1/MECP2/ZFYVE27/IST1	10
GO:0032543	mitochondrial translation	10/967	17/1831	0.401624	0.999326	0.999326	MRPL44/GATB/LRPPRC/MRPL23/MRPL2/PTCD3/MRPS35/MTG2/MRPS16/MRPL42	10
GO:0034614	cellular response to reactive oxygen species	10/967	17/1831	0.401624	0.999326	0.999326	HGF/PTPRK/KDM6B/BECN1/SOD2/TOP2B/SIRT1/SETX/HDAC6/NET1	10
GO:0045727	positive regulation of translation	10/967	17/1831	0.401624	0.999326	0.999326	FMR1/METTL3/NPM1/YTHDF1/KHDRBS1/BACE1-AS/PLD1/UHMK1/POLDIP3/NIBAN1	10
GO:0045861	negative regulation of proteolysis	10/967	17/1831	0.401624	0.999326	0.999326	SERPINB8/HGF/PSME3IP1/USP9X/SH3RF1/HDAC6/CAAP1/HFE/CARD8/CAST	10
GO:2000116	regulation of cysteine-type endopeptidase activity	10/967	17/1831	0.401624	0.999326	0.999326	HGF/SYK/FOXL2/USP50/APAF1/SIRT1/SH3RF1/CAAP1/CARD8/CAST	10
GO:0006886	intracellular protein transport	62/967	114/1831	0.401694	0.999326	0.999326	INSIG1/MFF/VIPAS39/VTI1A/ERLEC1/SYNRG/TOMM22/TRAK2/NPM1/YWHAQ/YOD1/AP3B2/VPS36/SYK/KCNQ3/SNX1/PTPN1/TCAF1/ZDHHC2/ZDHHC11/IFT22/BECN1/USP9X/IPO7/UBE2J1/RPGR/VPS41/STX7/STX18/CBLB/ING1/RABL2B/ERBIN/ARFRP1/MAVS/UHMK1/PRKD1/STXBP4/RAPGEF3/HUWE1/MIEF1/ASPSCR1/HDAC6/ZFAND1/STRADB/ITGB2/SNX6/FGF9/RABL3/AP3M2/GOLGA7B/ANGPT1/ABRA/NETO1/RAB22A/APPBP2/TOMM5/PPM1A/FUT10/STX2/SPG11/AP4M1	62
GO:0007417	central nervous system development	62/967	114/1831	0.401694	0.999326	0.999326	TTBK2/TTC21B/WNT7B/SEMA5A/METTL3/RAX/AFF2/YWHAQ/TLR4/ATP1B2/BTD/SOS1/BCL2/ADARB1/KDM6B/FGF10/HOXB8/ADAM23/MCPH1/CUL4B/ALDH5A1/WDR1/UBE3A/WDR89/WHRN/RFX8/ZEB2/GIT2/TMEM14B/MACO1/EPHA5/IFNGR1/SLC1A2/FBXW11/TMEM108/FOXB1/TOP2B/SHROOM2/JARID2/POU6F2/KCNA1/APAF1/JHY/FZD1/SIN3A/DIXDC1/FGF9/FAT4/DRGX/ALDH1A3/B4GALT5/RBBP7/SRGAP2/NHEJ1/MECP2/ZIC4/ATP2B4/ATXN1/FUT10/CCDC14/SPG11/C21orf91	62
GO:0048568	embryonic organ development	24/967	43/1831	0.404655	0.999326	0.999326	INSIG1/SP3/WNT7B/KMT2A/UTP25/VASH1/HOXD3/FOXL2/HEY2/SETDB2/IRX5/FGF10/HOXB8/HOXA4/WHRN/WDR48/TIFAB/ZFPM1/FGF9/MMP16/ALDH1A3/FRZB/APLNR/MYO3B	24
GO:0032409	regulation of transporter activity	17/967	30/1831	0.405889	0.999326	0.999326	FMR1/HTT/WWP2/ATP1B2/BCL2/ACTN2/JPH2/TCAF1/ADRA2A/GPD1L/WNK2/NDFIP2/CABP4/STIM1/AKAP9/NETO1/STIMATE	17
GO:0035725	sodium ion transmembrane transport	17/967	30/1831	0.405889	0.999326	0.999326	SLC24A1/SLC9A7/SLC9B2/ATP1B2/SLC6A1/GPD1L/ATP4B/SLC24A4/WNK2/SLC6A6/SHROOM2/SLC5A2/SLC6A13/SLC4A7/NETO1/SLC20A1/ATP2B4	17
GO:0048812	neuron projection morphogenesis	47/967	86/1831	0.406241	0.999326	0.999326	BDNF/CAPRIN1/TBC1D24/STAU2/WNT7B/SEMA5A/YTHDF1/SPAST/BRAF/SOS1/ENAH/BCL2/ADARB1/TIAM1/THY1/KALRN/USP9X/NEXN/EPHA5/TMEM108/FOXB1/TOP2B/ST8SIA2/ZDHHC17/SIN3A/SULT4A1/TANC2/EPB41L3/CDKL3/HDAC6/ADGRB3/PPFIA2/DRGX/B4GALT5/FSTL4/CAMK2B/SRGAP2/MECP2/MARK2/ZFYVE27/IST1/NECTIN1/NCAM1/UST/ETV1/SS18L1/SPG11	47
GO:0019953	sexual reproduction	56/967	103/1831	0.412031	0.999326	0.999326	NECTIN3/VIPAS39/AFF4/RNF2/RAD23B/RAD50/STAU2/SHB/METTL3/TOP3A/TESMIN/GORASP2/RAI14/SOS1/BCL2/FOXL2/SMC4/GLRB/KHDRBS1/SPIRE1/CCDC136/NECTIN2/ETV5/ETV6/USP9X/WDR77/UBE3A/ACE/SYT6/UBE2J1/MARF1/WDR48/MCMDC2/FBXW11/ADAM28/TOP2B/TRIM36/SIRT1/SETX/AGO4/CATSPERE/HSF2BP/CATSPERG/WBP2NL/ZDBF2/TDRP/YTHDC1/DNHD1/ANAPC4/AKAP3/RGS2/ATP2B4/MSH6/FUT10/STX2/AGFG1	56
GO:0016192	vesicle-mediated transport	106/967	197/1831	0.413209	0.999326	0.999326	INSIG1/SYS1/LMAN2/FMR1/HTT/VIPAS39/TBC1D24/RIN3/VTI1A/ACSL3/EXOC7/ABCA7/SYNRG/SLC9B2/TMEM167A/RAB33B/BICD2/RAB36/TLR4/SPAST/SFT2D3/BRAF/AP3B2/VPS36/SYK/ABCC4/SH3BP4/VAMP4/CANX/FCHO2/EPS15L1/SNX1/ACTN2/ZFPL1/SPIRE1/GULP1/ATP6V1B2/PTPN1/ALMS1/ZDHHC2/GRK3/TPH1/SNX18/C4B/KALRN/BECN1/CD209/GPR107/UBE3A/ADRA2A/KIF16B/ATP2C1/SYT6/VPS41/STX7/SNX7/STXBP5/STX18/PLD1/EPN2/EXOC2/GIT2/SORCS1/ATP9B/RAB11FIP3/A…	106
GO:0009615	response to virus	25/967	45/1831	0.413309	0.999326	0.999326	FMR1/MX2/IFNAR2/APOBEC3D/APOBEC3F/SEC14L1/BCL2/ADARB1/ABCC9/STAT1/ZDHHC11/BECN1/EIF2AK2/TRIM52/USP44/IFNGR1/ERBIN/MAVS/TANK/SIN3A/HMGA2/CARD8/TRIM13/NCBP1/IKBKB	25
GO:0022412	cellular process involved in reproduction in multicellular organism	25/967	45/1831	0.413309	0.999326	0.999326	AFF4/RNF2/STAU2/SHB/METTL3/TESMIN/SOS1/BCL2/FOXL2/SPIRE1/CCDC136/NECTIN2/ETV5/ETV6/WDR77/UBE2J1/MARF1/FBXW11/AGO4/CATSPERE/HSF2BP/ZDBF2/YTHDC1/DNHD1/AGFG1	25
GO:0023061	signal release	33/967	60/1831	0.416392	0.999326	0.999326	SIRT3/FMR1/VIP/SLC9B2/MAP2K6/BRAF/CPT1A/SYK/FOXL2/ABCC4/TIAM1/ADORA3/ADRA2A/SYT6/STXBP5/RFX3/EPHA5/RAB11FIP3/CAPN10/TFAP2B/PRKD1/STXBP4/RAB11FIP1/DNAJC5/TM7SF3/PPFIA2/HFE/DOC2B/ATP2A2/GNAZ/SYT11/LIN7A/STX2	33
GO:0000082	G1/S transition of mitotic cell cycle	11/967	19/1831	0.41684	0.999326	0.999326	RPTOR/BCL2/ARID1B/KHDRBS1/FGF10/CUL4B/RBL1/TMEM14B/E2F6/CACUL1/GFI1	11
GO:0006839	mitochondrial transport	11/967	19/1831	0.41684	0.999326	0.999326	MFF/THEM4/TOMM22/CPT1A/BCL2/SLC25A16/SPG7/HUWE1/SLC25A13/SLC25A32/TOMM5	11
GO:0032271	regulation of protein polymerization	11/967	19/1831	0.41684	0.999326	0.999326	RICTOR/FCHSD1/EPS8/TBCD/ARPC5L/FMN1/LMOD1/ARHGAP40/AKAP9/MECP2/ARFGEF1	11
GO:0022414	reproductive process	82/967	152/1831	0.418224	0.999326	0.999326	NECTIN3/VIPAS39/VIP/AFF4/RNF2/RAD23B/RAD50/STAU2/SHB/SP3/SLC38A3/METTL3/TOP3A/TESMIN/SLC9B2/GORASP2/RAI14/MAP2K6/SOS1/BCL2/FOXL2/SMC4/GLRB/STOX2/KHDRBS1/SPIRE1/CCDC136/NECTIN2/IDO1/IRX5/FGF10/THRA/FEM1B/ETV5/ETV6/USP9X/WDR77/UBE3A/ACE/ADRA2A/SYT6/UBE2J1/MARF1/SLC19A1/WDR48/MCMDC2/FBXW11/ADAM28/TOP2B/PTHLH/PSAPL1/TRIM36/THBD/SIRT1/TIFAB/SETX/AGO4/CATSPERE/ITGA3/PTGFR/HSF2BP/HFE/CATSPERG/WBP2NL/ZDB…	82
GO:0009057	macromolecule catabolic process	91/967	169/1831	0.420605	0.999326	0.999326	WWTR1/CTSC/FMR1/VIP/CAPRIN1/RAD23B/WWP2/ERLEC1/SPATA18/ARMC8/UBE2Z/LRPPRC/METTL3/GNA12/SNX25/NPM1/YTHDF1/UTP25/YOD1/VPS36/FAM8A1/UGGT1/FOXL2/CANX/TOLLIP/GRSF1/KBTBD7/PTPN1/ZDHHC2/HGSNAT/FEM1B/CUL4B/BECN1/PSME3IP1/USP9X/WDR77/UBE3A/ADRA2A/KIF16B/FBXL22/AGO1/UBE2J1/THRAP3/RPGR/DNAJB12/USP44/CBLB/USP13/RNF150/UGGT2/ATE1/NDFIP2/SH3RF2/FBXW11/FBXO3/APAF1/TMEM67/SIRT1/SH3RF1/FBXO48/AGO4/PNPT1/CACUL1/MD…	91
GO:0044782	cilium organization	26/967	47/1831	0.421592	0.999326	0.999326	WWTR1/TTBK2/HTT/TTC21B/BBOF1/CC2D2B/ABCC4/WDR35/NECTIN2/KIF3A/TMEM107/IFT22/PTPDC1/RPGR/RFX3/GORAB/RAB11FIP3/RABL2B/TMEM67/JHY/SSX2IP/CCDC65/HDAC6/POC1B/DNHD1/DNAAF11	26
GO:0051248	negative regulation of protein metabolic process	50/967	92/1831	0.423241	0.999326	0.999326	WWTR1/FMR1/SERPINB8/CAPRIN1/WTIP/TBC1D24/ERRFI1/HGF/ABCA7/METTL3/NPM1/YTHDF1/ADARB1/SPRED1/PTPN1/THY1/PINX1/PSME3IP1/USP9X/EIF2AK2/IPO7/AGO1/GPD1L/USP44/CBLB/PTPRQ/SH3RF2/SIRT1/SH3RF1/AGO4/PNPT1/MDM4/GPRC5A/DNAJC10/HDAC6/CAAP1/HFE/NIBAN1/SNX6/RC3H2/TNRC6B/CARD8/CAST/SET/USP4/ANGPT1/RGS2/ATP2B4/IKBKB/VBP1	50
GO:0006486	protein glycosylation	19/967	34/1831	0.426604	0.999326	0.999326	MGAT2/UGGT1/ST3GAL3/B3GLCT/UBE2J1/FUT2/UGGT2/GCNT1/POFUT1/POMT1/ST8SIA2/FUT5/GALNT7/B4GALT5/POGLUT1/C1GALT1/DPY19L4/ARFGEF1/FUT10	19
GO:0043413	macromolecule glycosylation	19/967	34/1831	0.426604	0.999326	0.999326	MGAT2/UGGT1/ST3GAL3/B3GLCT/UBE2J1/FUT2/UGGT2/GCNT1/POFUT1/POMT1/ST8SIA2/FUT5/GALNT7/B4GALT5/POGLUT1/C1GALT1/DPY19L4/ARFGEF1/FUT10	19
GO:0007600	sensory perception	27/967	49/1831	0.429534	0.999326	0.999326	SLC24A1/RAX/ACP3/GJC1/GLRB/KCNQ3/GPR179/IRX5/HOXB8/WDR1/ADRA2A/RPGR/WHRN/SLC24A4/RIPOR2/GABRR2/POU6F2/KCNA1/CABP4/RRH/DRGX/ATXN7/SLC45A2/RETREG1/MECP2/UBR3/MYO3B	27
GO:0019221	cytokine-mediated signaling pathway	27/967	49/1831	0.429534	0.999326	0.999326	IFNAR2/TNFRSF13C/METTL3/SOS1/SYK/TOLLIP/XCR1/PTPN1/STAT1/IRAK4/IFNGR1/MAVS/MAP3K7/SIRT1/TANK/SIN3A/TNFSF18/ACKR2/CCR5/STAT4/CARD8/LIFR/ANGPT1/STAT5A/STAT5B/GFI1/IKBKB	27
GO:0030855	epithelial cell differentiation	35/967	64/1831	0.430142	0.999326	0.999326	WWTR1/ERRFI1/WNT7B/RPTOR/RAP2C/CPT1A/FOXL2/EXTL3/TOLLIP/SPRED1/HEY2/KDM6B/FGF10/THRA/STAT1/FEM1B/WDR77/ASXL1/IPO7/WHRN/TFCP2L1/RFX3/FOXB1/ASAH1/PSAPL1/RAPGEF3/FZD1/POU2F3/SLC4A7/C1GALT1/CBFA2T2/FRZB/KAZN/STAT5B/IKBKB	35
GO:0065008	regulation of biological quality	181/967	339/1831	0.430204	0.999326	0.999326	YRDC/SIRT3/BDNF/FMR1/HTT/VIP/SLC24A1/CAPRIN1/THEM4/TBC1D24/WWP2/RIN3/HRH1/SLC9A7/STAU2/TFPI2/WNT7B/ABCA7/RPTOR/KCNAB2/ATP8B2/SEMA5A/RICTOR/METTL3/KMT2A/GNA12/NPM1/FCHSD1/YTHDF1/SLC9B2/TLR4/ATP1B2/UTP25/SERF1B/EPS8/BRAF/CPT1A/PTGS1/SLC6A1/GJC1/BCL2/SYK/FOXL2/TIAM1/GLRB/KCNQ3/IP6K2/ACTN2/HEY2/XCR1/JPH2/ADH6/ATP6V1B2/FGF10/ZDHHC2/THRA/ABCC9/STAT1/TPH1/GABRA2/PINX1/ADH1B/USP9X/WDR1/UBE3A/ACE/ASXL1/AD…	181
GO:0000302	response to reactive oxygen species	12/967	21/1831	0.430438	0.999326	0.999326	HGF/PTPRK/BCL2/KDM6B/STAT1/BECN1/SOD2/TOP2B/SIRT1/SETX/HDAC6/NET1	12
GO:0002449	lymphocyte mediated immunity	12/967	21/1831	0.430438	0.999326	0.999326	CTSC/TP53BP1/SHLD2/NECTIN2/IGHG3/C4B/STX7/NCR3/MAP3K7/HFE/STAT5B/MSH6	12
GO:0002700	regulation of production of molecular mediator of immune response	12/967	21/1831	0.430438	0.999326	0.999326	HK1/TP53BP1/TLR4/SYK/SHLD2/UBE2J1/MAVS/MAP3K7/SIRT1/HFE/ANGPT1/GPRC5B	12
GO:0016579	protein deubiquitination	12/967	21/1831	0.430438	0.999326	0.999326	USP35/USP12/YOD1/USP9X/USP50/USP44/USP24/USP13/TANK/USP4/USP11/VCPIP1	12
GO:0017148	negative regulation of translation	12/967	21/1831	0.430438	0.999326	0.999326	FMR1/CAPRIN1/WTIP/METTL3/YTHDF1/EIF2AK2/AGO1/AGO4/PNPT1/RC3H2/TNRC6B/RGS2	12
GO:0042770	signal transduction in response to DNA damage	12/967	21/1831	0.430438	0.999326	0.999326	ATRIP/TP53BP1/NPM1/MAP2K6/EEF1E1/INTS7/TOPBP1/SPRED1/FEM1B/WDR76/SIRT1/MDM4	12
GO:0050770	regulation of axonogenesis	12/967	21/1831	0.430438	0.999326	0.999326	BDNF/SEMA5A/BRAF/TIAM1/THY1/CDKL3/HDAC6/FSTL4/MARK2/ZFYVE27/IST1/UST	12
GO:0061013	regulation of mRNA catabolic process	12/967	21/1831	0.430438	0.999326	0.999326	FMR1/VIP/CAPRIN1/METTL3/NPM1/YTHDF1/THRAP3/PNPT1/RC3H2/TNRC6B/SLC11A1/FASTKD1	12
GO:0071826	protein-RNA complex organization	12/967	21/1831	0.430438	0.999326	0.999326	KLC1/WDR77/AGO1/SETX/AGO4/SF3A1/ZFAND1/SHQ1/SF3A2/YTHDC1/NCBP1/USP4	12
GO:2000145	regulation of cell motility	60/967	111/1831	0.432293	0.999326	0.999326	TTBK2/TBC1D24/CCBE1/RIN3/HGF/GAB1/RAP2C/SEMA5A/PTPRK/GNA12/TLR4/ATP1B2/VASH1/BRAF/BCL2/ADARB1/ARPIN/TIAM1/ADORA3/SPRED1/TCAF1/FGF10/THY1/ZNF268/ACE/ADRA2A/ZEB2/NEXN/FRMD5/ING1/SH3RF2/RIPOR2/GCNT1/SOD2/PRKD1/MEAK7/MAP3K7/SIRT1/SIN3A/TNFSF18/SSX2IP/ITGA3/HDAC6/MITF/STK10/FGF9/GCSAM/SINHCAF/RBBP7/SULF1/STARD13/CAMK2B/ANGPT1/SRGAP2/MECP2/STAT5A/DNM1L/CASS4/ATP2B4/SMURF2	60
GO:0044281	small molecule metabolic process	103/967	192/1831	0.433737	0.999326	0.999326	INSIG1/YARS1/GATB/NT5E/THEM4/HK1/SORBS1/GALK2/HRH1/GLDC/APOBEC3D/ALDH4A1/ACSL3/DYRK2/ETFBKMT/RPTOR/APOBEC3F/KCNAB2/ACP3/NFE2L1/HMGCS1/BTD/CPT1A/FTCD/PTGS1/UGGT1/SYK/FPGS/INPP4B/IP6K2/VKORC1L1/LIPT2/ADH6/ATP6V1B2/IDO1/ACAD10/HECTD4/TPH1/CA11/SLC25A16/B3GLCT/ADH1B/ALDH5A1/DPYD/MAN2A2/BCO1/GPD1L/DHFR2/PRXL2B/SLC19A1/FUT2/BHMT2/UGGT2/NAXD/IDO2/ENTPD4/POFUT1/TFAP2B/AIG1/ASAH1/PTHLH/SIRT1/FUT5/GCDH/ENP…	103
GO:0048667	cell morphogenesis involved in neuron differentiation	44/967	81/1831	0.435551	0.999326	0.999326	BDNF/CAPRIN1/TBC1D24/STAU2/SEMA5A/YTHDF1/SPAST/BRAF/SOS1/TBCD/ENAH/BCL2/ADARB1/TIAM1/THY1/KALRN/USP9X/WHRN/NEXN/EPHA5/FOXB1/TOP2B/ZDHHC17/SIN3A/SULT4A1/TANC2/CABP4/CDKL3/HDAC6/ADGRB3/PPFIA2/DRGX/B4GALT5/FSTL4/CAMK2B/MARK2/ZFYVE27/IST1/NECTIN1/NCAM1/UST/ETV1/SS18L1/SPG11	44
GO:2000026	regulation of multicellular organismal development	78/967	145/1831	0.437087	0.999326	0.999326	WWTR1/CTSC/BDNF/IRF4/CAPRIN1/TBC1D24/CCBE1/ERRFI1/STAU2/SHB/FAM210B/GAB1/RPTOR/SEMA5A/METTL3/SLC9B2/TLR4/UTP25/VASH1/BRAF/SOS1/SYK/ING5/ARID1B/TIAM1/BHLHE40/EXTL3/NBR1/SPRED1/HEY2/FGF10/HOXB8/STAT1/THY1/BRD1/ETV5/FIG4/ACE/IPO7/AGO1/HEYL/EPN2/RFX3/PRKD1/PTHLH/JARID2/ST8SIA2/RAPGEF3/SIRT1/SH3RF1/TNFSF18/STIM1/CDKL3/HDAC6/HMGA2/ADGRB3/ZFPM1/MITF/CAMK4/HTATIP2/FGF9/RC3H2/KAT6B/B4GALT5/FSTL4/POGLUT1/S…	78
GO:0006753	nucleoside phosphate metabolic process	28/967	51/1831	0.437164	0.999326	0.999326	NT5E/ACSL3/RPTOR/KCNAB2/ACP3/HMGCS1/ATP6V1B2/IDO1/SLC25A16/DPYD/GPD1L/NAXD/IDO2/ENTPD4/PTHLH/GCDH/AK4/SLC4A7/FMO5/SULT1A1/PRPS1/SLC25A13/PPARGC1A/ME2/DNM1L/NADSYN1/MLYCD/ELOVL7	28
GO:0009117	nucleotide metabolic process	28/967	51/1831	0.437164	0.999326	0.999326	NT5E/ACSL3/RPTOR/KCNAB2/ACP3/HMGCS1/ATP6V1B2/IDO1/SLC25A16/DPYD/GPD1L/NAXD/IDO2/ENTPD4/PTHLH/GCDH/AK4/SLC4A7/FMO5/SULT1A1/PRPS1/SLC25A13/PPARGC1A/ME2/DNM1L/NADSYN1/MLYCD/ELOVL7	28
GO:0002244	hematopoietic progenitor cell differentiation	13/967	23/1831	0.442736	0.999326	0.999326	AGPAT5/SP3/METTL3/BRAF/SOS1/BCL2/SLC7A6OS/TNFRSF13B/EIF2AK2/ACE/WDR7/TIFAB/SIN3A	13
GO:0006643	membrane lipid metabolic process	13/967	23/1831	0.442736	0.999326	0.999326	SIRT3/ST3GAL3/SMPDL3B/FUT2/PRKD1/ASAH1/PSAPL1/ST8SIA2/FUT5/SPTLC1/B4GALT5/ELOVL7/ASAH2	13
GO:0007030	Golgi organization	13/967	23/1831	0.442736	0.999326	0.999326	HTT/VTI1A/ATP8B2/RAB33B/GORASP2/VAMP4/STX18/PRKD1/HUWE1/SURF4/AKAP9/VCPIP1/ARFGEF1	13
GO:0030010	establishment of cell polarity	13/967	23/1831	0.442736	0.999326	0.999326	HTT/SPDL1/RICTOR/MPP7/GPSM2/FGF10/MCPH1/WWC1/FBXW11/RIPOR2/MARK2/ARFGEF1/UST	13
GO:0032869	cellular response to insulin stimulus	13/967	23/1831	0.442736	0.999326	0.999326	INSIG1/SORBS1/GAB1/SOS1/PTPN1/STAT1/PTPRE/CAPN10/STXBP4/SIRT1/GRB14/IDE/PTPRA	13
GO:0033500	carbohydrate homeostasis	13/967	23/1831	0.442736	0.999326	0.999326	HK1/ZNF236/SLC9B2/TIAM1/HECTD4/ACE/ADRA2A/EPHA5/STXBP4/SIRT1/SIN3A/ASPSCR1/PPARGC1A	13
GO:0042445	hormone metabolic process	13/967	23/1831	0.442736	0.999326	0.999326	ADH6/ADH1B/ACE/BCO1/ERO1B/HFE/SULT1A1/TIPARP/ALDH1A3/DUOXA1/IDE/STAT5B/GFI1	13
GO:0042593	glucose homeostasis	13/967	23/1831	0.442736	0.999326	0.999326	HK1/ZNF236/SLC9B2/TIAM1/HECTD4/ACE/ADRA2A/EPHA5/STXBP4/SIRT1/SIN3A/ASPSCR1/PPARGC1A	13
GO:0048762	mesenchymal cell differentiation	13/967	23/1831	0.442736	0.999326	0.999326	WWTR1/HGF/SEMA5A/BCL2/TIAM1/SPRED1/HEY2/FGF10/STAT1/HEYL/HMGA2/FRZB/NCAM1	13
GO:2001234	negative regulation of apoptotic signaling pathway	13/967	23/1831	0.442736	0.999326	0.999326	BDNF/HTT/HGF/BCL2/PTPN1/FGF10/SOD2/SIRT1/SH3RF1/FZD1/CAAP1/STRADB/ASAH2	13
GO:0120031	plasma membrane bounded cell projection assembly	37/967	68/1831	0.443094	0.999326	0.999326	WWTR1/TTBK2/FMR1/HTT/STAU2/TTC21B/EPS8/BBOF1/CC2D2B/ABCC4/ACTN2/WDR35/KIF3A/TMEM107/IFT22/PTPDC1/RPGR/FMNL3/PLD1/RFX3/GORAB/RAB11FIP3/RIPOR2/RABL2B/MYO10/TMEM67/JHY/SSX2IP/PLEKHM1/WHAMM/CCDC65/HDAC6/POC1B/DNHD1/SRGAP2/DNAAF11/MYO3B	37
GO:1901699	cellular response to nitrogen compound	37/967	68/1831	0.443094	0.999326	0.999326	INSIG1/SORBS1/HRH1/GAB1/RPTOR/NPM1/TLR4/SOS1/ARID1B/SH3BP4/ACTN2/PTPN1/STAT1/PTPRE/AQP9/SLC1A2/CAPN10/MAVS/PRKD1/TOP2B/STXBP4/MAP3K7/RAPGEF3/SIRT1/SIN3A/GRB14/UBR1/SNX6/SOCS2/GNAZ/AKAP9/MECP2/STAT5A/IDE/STAT5B/ATP2B4/PTPRA	37
GO:0140352	export from cell	54/967	100/1831	0.444407	0.999326	0.999326	SIRT3/FMR1/VIP/SLC38A3/EXOC7/SLC9B2/TMEM167A/RAB33B/MAP2K6/TLR4/ATP1B2/BRAF/CPT1A/SYK/FOXL2/ABCC4/TIAM1/CANX/ADORA3/FGF10/TPH1/SLC22A5/ADRA2A/SYT6/ATP4B/STXBP5/EXOC2/RFX3/SLC24A4/EPHA5/TANGO6/RAB11FIP3/CAPN10/TFAP2B/PRKD1/STXBP4/RAB11FIP1/DNAJC5/TM7SF3/SLC29A4/PPFIA2/HFE/ITGB2/DOC2B/PDIA4/ATP2A2/KCNT2/GNAZ/SYT11/MECP2/DNM1L/ARFGEF1/LIN7A/STX2	54
GO:0050863	regulation of T cell activation	21/967	38/1831	0.444977	0.999326	0.999326	IRF4/SHB/TNFRSF13C/METTL3/BRAF/SOS1/SYK/ARID1B/IDO1/THY1/CD209/CBLB/RIPOR2/SH3RF1/TNFSF18/TNFRSF9/ARG2/HFE/CAMK4/RC3H2/STAT5B	21
GO:0051607	defense response to virus	21/967	38/1831	0.444977	0.999326	0.999326	MX2/IFNAR2/APOBEC3D/APOBEC3F/SEC14L1/BCL2/ADARB1/ABCC9/STAT1/ZDHHC11/BECN1/EIF2AK2/TRIM52/USP44/ERBIN/MAVS/TANK/SIN3A/CARD8/TRIM13/NCBP1	21
GO:0140546	defense response to symbiont	21/967	38/1831	0.444977	0.999326	0.999326	MX2/IFNAR2/APOBEC3D/APOBEC3F/SEC14L1/BCL2/ADARB1/ABCC9/STAT1/ZDHHC11/BECN1/EIF2AK2/TRIM52/USP44/ERBIN/MAVS/TANK/SIN3A/CARD8/TRIM13/NCBP1	21
GO:0019219	regulation of nucleobase-containing compound metabolic process	259/967	487/1831	0.445315	0.999326	0.999326	WWTR1/ATRIP/IGSF1/RBM25/SRA1/FMR1/MXD4/ZNF195/IRF4/G3BP2/VIP/CAMTA1/PTOV1/ZNF19/CAPRIN1/WTIP/RNF2/RAD50/WWP2/ZNF451/ZNF264/APOBEC3D/TCF4/SP3/SLC38A3/TTC21B/HGF/TP53BP1/PKNOX1/RPTOR/APOBEC3F/ZNF526/ZNF391/RAP2C/SMARCAD1/LRPPRC/METTL3/RAX/E2F5/KMT2A/AFF2/PTPRK/NPM1/WDR43/ZNF286A/YTHDF1/ZNF236/TESMIN/YWHAQ/GMEB2/STK16/ZNF362/NFE2L1/TLR4/ZNF493/UBTF/ZNF793/INTS7/SOS1/ZNF546/HOXD3/ZNF383/SYK/ING5/CBX6…	259
GO:0001909	leukocyte mediated cytotoxicity	6/967	10/1831	0.447641	0.999326	0.999326	CTSC/NECTIN2/STX7/NCR3/HFE/STAT5B	6
GO:0002028	regulation of sodium ion transport	6/967	10/1831	0.447641	0.999326	0.999326	ATP1B2/NKAIN3/GPD1L/WNK2/NETO1/ATP2B4	6
GO:0002065	columnar/cuboidal epithelial cell differentiation	6/967	10/1831	0.447641	0.999326	0.999326	RPTOR/WDR77/IPO7/RFX3/C1GALT1/CBFA2T2	6
GO:0002088	lens development in camera-type eye	6/967	10/1831	0.447641	0.999326	0.999326	NECTIN3/WNT7B/SPRED1/SHROOM2/NHS/NECTIN1	6
GO:0006497	protein lipidation	6/967	10/1831	0.447641	0.999326	0.999326	ZDHHC2/ZDHHC11/ZDHHC17/RABL3/GOLGA7B/PPM1A	6
GO:0006858	extracellular transport	6/967	10/1831	0.447641	0.999326	0.999326	WWP2/NEK10/RFX3/JHY/DNAAF11/DNAH9	6
GO:0007006	mitochondrial membrane organization	6/967	10/1831	0.447641	0.999326	0.999326	THEM4/TOMM22/BCL2/SPG7/DNAJC11/TOMM5	6
GO:0008584	male gonad development	6/967	10/1831	0.447641	0.999326	0.999326	BCL2/ACE/WDR48/AGO4/FGF9/DNAAF11	6
GO:0009062	fatty acid catabolic process	6/967	10/1831	0.447641	0.999326	0.999326	ETFBKMT/CPT1A/ACAD10/AIG1/GCDH/MLYCD	6
GO:0009798	axis specification	6/967	10/1831	0.447641	0.999326	0.999326	RNF2/HEY2/SETDB2/FGF10/WDR77/TIFAB	6
GO:0016266	O-glycan processing	6/967	10/1831	0.447641	0.999326	0.999326	ST3GAL3/GCNT1/POFUT1/GALNT7/B4GALT5/C1GALT1	6
GO:0021545	cranial nerve development	6/967	10/1831	0.447641	0.999326	0.999326	HOXD3/ADARB1/SLC24A4/KCNA1/TIFAB/DRGX	6
GO:0031341	regulation of cell killing	6/967	10/1831	0.447641	0.999326	0.999326	SYK/NECTIN2/STX7/NCR3/HFE/STAT5B	6
GO:0032481	positive regulation of type I interferon production	6/967	10/1831	0.447641	0.999326	0.999326	TLR4/SYK/STAT1/MAVS/TANK/ARRDC4	6
GO:0035567	non-canonical Wnt signaling pathway	6/967	10/1831	0.447641	0.999326	0.999326	TIAM1/TMEM67/FZD1/PRICKLE2/FRZB/SMURF2	6
GO:0042158	lipoprotein biosynthetic process	6/967	10/1831	0.447641	0.999326	0.999326	ZDHHC2/ZDHHC11/ZDHHC17/RABL3/GOLGA7B/PPM1A	6
GO:0043112	receptor metabolic process	6/967	10/1831	0.447641	0.999326	0.999326	SNX25/PTPN1/BECN1/USP9X/KIF16B/GPRASP1	6
GO:0043405	regulation of MAP kinase activity	6/967	10/1831	0.447641	0.999326	0.999326	TLR4/PTPN1/NEK10/ADRA2A/MAP3K7/RGS2	6
GO:0046546	development of primary male sexual characteristics	6/967	10/1831	0.447641	0.999326	0.999326	BCL2/ACE/WDR48/AGO4/FGF9/DNAAF11	6
GO:0046637	regulation of alpha-beta T cell differentiation	6/967	10/1831	0.447641	0.999326	0.999326	IRF4/SHB/SYK/SH3RF1/TNFSF18/RC3H2	6
GO:0048002	antigen processing and presentation of peptide antigen	6/967	10/1831	0.447641	0.999326	0.999326	CD209/ACE/HFE/SLC11A1/IDE/IKBKB	6
GO:0048010	vascular endothelial growth factor receptor signaling pathway	6/967	10/1831	0.447641	0.999326	0.999326	PTPN1/FGF10/EPN2/PRKD1/FGF9/SULF1	6
GO:0050768	negative regulation of neurogenesis	6/967	10/1831	0.447641	0.999326	0.999326	SEMA5A/THY1/CDKL3/HDAC6/FSTL4/MECP2	6
GO:0050772	positive regulation of axonogenesis	6/967	10/1831	0.447641	0.999326	0.999326	BDNF/SEMA5A/BRAF/TIAM1/ZFYVE27/IST1	6
GO:0050777	negative regulation of immune response	6/967	10/1831	0.447641	0.999326	0.999326	METTL3/SYK/TNFSF18/ARG2/HFE/RC3H2	6
GO:0051298	centrosome duplication	6/967	10/1831	0.447641	0.999326	0.999326	NPM1/ALMS1/TMEM67/SIRT1/POC1B/MDM1	6
GO:0051452	intracellular pH reduction	6/967	10/1831	0.447641	0.999326	0.999326	SLC9A7/BCL2/ATP6V1B2/UBE3A/SLC4A7/SLC11A1	6
GO:0051928	positive regulation of calcium ion transport	6/967	10/1831	0.447641	0.999326	0.999326	HTT/JPH2/THY1/STIM1/APLNR/STIMATE	6
GO:0061014	positive regulation of mRNA catabolic process	6/967	10/1831	0.447641	0.999326	0.999326	CAPRIN1/METTL3/YTHDF1/PNPT1/RC3H2/TNRC6B	6
GO:2000144	positive regulation of DNA-templated transcription initiation	6/967	10/1831	0.447641	0.999326	0.999326	CAND1/SETX/MITF/TAF3/GTF2A1/MED17	6
GO:0048609	multicellular organismal reproductive process	47/967	87/1831	0.452349	0.999326	0.999326	VIPAS39/VIP/AFF4/RNF2/RAD23B/STAU2/SHB/SP3/METTL3/TESMIN/GORASP2/RAI14/MAP2K6/SOS1/BCL2/FOXL2/STOX2/KHDRBS1/SPIRE1/CCDC136/NECTIN2/ETV5/ETV6/USP9X/WDR77/ACE/UBE2J1/MARF1/WDR48/FBXW11/ADAM28/SIRT1/SETX/AGO4/CATSPERE/ITGA3/HSF2BP/CATSPERG/ZDBF2/TDRP/YTHDC1/DNHD1/RGS2/STAT5B/ATP2B4/MSH6/AGFG1	47
GO:0002683	negative regulation of immune system process	22/967	40/1831	0.453445	0.999326	0.999326	IRF4/RIN3/METTL3/SEC14L1/TLR4/SYK/IDO1/THY1/TNFRSF13B/SMPDL3B/CBLB/RIPOR2/ERBIN/TNFSF18/ARG2/ZFPM1/HFE/RC3H2/GCSAM/CARD8/SYT11/ANGPT1	22
GO:0016311	dephosphorylation	22/967	40/1831	0.453445	0.999326	0.999326	HTT/RNGTT/CAMTA1/ACP3/PTPRK/GNA12/INPP4B/PTPN1/PTPRE/PTPDC1/FIG4/MTMR1/PTPRQ/FBXW11/PTPN21/PTPN18/PTPN20/PTP4A2/PTPRA/PPM1A/IKBKB/PPP2R5C	22
GO:0000003	reproduction	82/967	153/1831	0.453634	0.999326	0.999326	NECTIN3/VIPAS39/VIP/AFF4/RNF2/RAD23B/RAD50/STAU2/SHB/SP3/SLC38A3/METTL3/TOP3A/TESMIN/SLC9B2/GORASP2/RAI14/MAP2K6/SOS1/BCL2/FOXL2/SMC4/GLRB/STOX2/KHDRBS1/SPIRE1/CCDC136/NECTIN2/IDO1/IRX5/FGF10/THRA/FEM1B/ETV5/ETV6/USP9X/WDR77/UBE3A/ACE/ADRA2A/SYT6/UBE2J1/MARF1/SLC19A1/WDR48/MCMDC2/FBXW11/ADAM28/TOP2B/PTHLH/PSAPL1/TRIM36/THBD/SIRT1/TIFAB/SETX/AGO4/CATSPERE/ITGA3/PTGFR/HSF2BP/HFE/CATSPERG/WBP2NL/ZDB…	82
GO:0006164	purine nucleotide biosynthetic process	14/967	25/1831	0.453968	0.999326	0.999326	ACSL3/IDO1/SLC25A16/NAXD/IDO2/GCDH/AK4/SLC4A7/PRPS1/SLC25A13/PPARGC1A/NADSYN1/MLYCD/ELOVL7	14
GO:0045595	regulation of cell differentiation	91/967	170/1831	0.45437	0.999326	0.999326	WWTR1/INSIG1/SRA1/BDNF/IRF4/CAPRIN1/TBC1D24/ERRFI1/STAU2/SHB/TCF4/FAM210B/HGF/WNT7B/RPTOR/SEMA5A/METTL3/SLC9B2/TLR4/BRAF/SOS1/HOXD3/BCL2/SYK/ING5/ARID1B/TIAM1/BHLHE40/EXTL3/NBR1/SPRED1/HEY2/KDM4C/FGF10/HOXB8/STAT1/THY1/TPH1/BRD1/ETV5/ZNF268/EIF2AK2/WDR1/ACE/ASXL1/IPO7/HEYL/ZEB2/RFX3/PTPRQ/SLC6A6/RIPOR2/SOD2/TFAP2B/PRKD1/PTHLH/SIRT1/SH3RF1/BEND6/SIN3A/TNFSF18/CDKL3/HDAC6/ZFPM1/MITF/WDFY2/CAMK4/MBN…	91
GO:1901700	response to oxygen-containing compound	100/967	187/1831	0.454911	0.999326	0.999326	INSIG1/NT5E/SORBS1/HRH1/GLDC/FAM210B/HGF/WNT7B/GAB1/RPTOR/KMT2A/PTPRK/ZNF236/SLC9B2/MAP2K6/TLR4/EPS8/BRAF/CPT1A/SOS1/SLC6A1/BCL2/ARID1B/SH3BP4/TIAM1/KCNQ3/IP6K2/EXTL3/ACTN2/KDM6B/ADH6/IDO1/PTPN1/FGF10/ABCC9/STAT1/IRAK4/PTPRE/AQP9/BECN1/UBE3A/ACE/ASXL1/ADRA2A/SYT6/ATP4B/SLC24A4/EPHA5/SLC1A2/GCNT1/F5/SOD2/ERBIN/MMP13/CAPN10/PRKD1/TOP2B/STXBP4/MEAK7/FBXO3/THBD/ST8SIA2/MAP3K7/RAPGEF3/SIRT1/SH3RF1/TIF…	100
GO:0032504	multicellular organism reproduction	48/967	89/1831	0.457708	0.999326	0.999326	VIPAS39/VIP/AFF4/RNF2/RAD23B/STAU2/SHB/SP3/METTL3/TESMIN/GORASP2/RAI14/MAP2K6/SOS1/BCL2/FOXL2/STOX2/KHDRBS1/SPIRE1/CCDC136/NECTIN2/THRA/ETV5/ETV6/USP9X/WDR77/ACE/UBE2J1/MARF1/WDR48/FBXW11/ADAM28/SIRT1/SETX/AGO4/CATSPERE/ITGA3/HSF2BP/CATSPERG/ZDBF2/TDRP/YTHDC1/DNHD1/RGS2/STAT5B/ATP2B4/MSH6/AGFG1	48
GO:0006397	mRNA processing	31/967	57/1831	0.458409	0.999326	0.999326	RBM25/FMR1/RNGTT/METTL3/AFF2/NPM1/ADARB1/KHDRBS1/GRSF1/WDR77/RPRD1A/THRAP3/SRSF11/SETX/PNPT1/RBM26/SF3A1/SRSF4/AQR/MBNL3/SF3A2/YTHDC1/RBFOX1/RBM41/PPARGC1A/NCBP1/USP4/ARMC7/NCBP2/ZCCHC8/THOC3	31
GO:0042110	T cell activation	31/967	57/1831	0.458409	0.999326	0.999326	IRF4/SHB/SP3/PKNOX1/TNFRSF13C/METTL3/KMT2A/BRAF/SOS1/BCL2/SYK/ARID1B/IDO1/THY1/CD209/USP44/CBLB/RIPOR2/SH3RF1/TNFSF18/TNFRSF9/ARG2/ZFPM1/STAT4/HFE/CAMK4/RC3H2/RABL3/SLC11A1/NHEJ1/STAT5B	31
GO:1902680	positive regulation of RNA biosynthetic process	110/967	206/1831	0.458792	0.999326	0.999326	WWTR1/SRA1/IRF4/CAMTA1/PTOV1/WWP2/TCF4/SP3/SLC38A3/HGF/TP53BP1/PKNOX1/RPTOR/RAP2C/RAX/E2F5/KMT2A/NPM1/WDR43/GMEB2/STK16/TLR4/ZNF493/UBTF/HOXD3/FOXL2/ARID1B/ZNF516/ZNF208/ACTN2/HEY2/KDM6B/KDM4C/CAND1/WWOX/ELK4/FGF10/THRA/STAT1/WWC1/ZNF496/ETV5/ETV6/ZNF268/WDR77/ZNF300/HOXA4/UBE3A/ASXL1/TRIM52/AGO1/THRAP3/FHL5/HEYL/ZEB2/NFYB/ZNF507/TFCP2L1/RFX3/ING1/FBXW11/ZNF197/TFAP2B/MAVS/PRKD1/TOP2B/MOSPD1/TRRA…	110
GO:0046903	secretion	57/967	106/1831	0.459289	0.999326	0.999326	SIRT3/FMR1/VIP/SLC38A3/ACSL3/EXOC7/SLC9B2/TMEM167A/RAB33B/MAP2K6/TLR4/BRAF/CPT1A/SLC6A1/SYK/FOXL2/ABCC4/TIAM1/CANX/ADORA3/FGF10/TPH1/AQP9/ACE/ADRA2A/SYT6/STXBP5/EXOC2/RFX3/EPHA5/TANGO6/RAB11FIP3/CAPN10/TFAP2B/FOXB1/PRKD1/STXBP4/RAB11FIP1/TIFAB/DNAJC5/TM7SF3/PPFIA2/HFE/ITGB2/DOC2B/PDIA4/SOCS2/ATP2A2/GNAZ/SYT11/MECP2/STAT5A/DNM1L/STAT5B/ARFGEF1/LIN7A/STX2	57
GO:1903706	regulation of hemopoiesis	23/967	42/1831	0.461499	0.999326	0.999326	IRF4/SHB/FAM210B/RPTOR/METTL3/SLC9B2/TLR4/BRAF/SOS1/SYK/ING5/ARID1B/HOXB8/STAT1/BRD1/SH3RF1/TNFSF18/ZFPM1/MITF/CAMK4/RC3H2/KAT6B/STAT5B	23
GO:0048870	cell motility	102/967	191/1831	0.462163	0.999326	0.999326	TTBK2/TBC1D24/CCBE1/RIN3/HGF/SPDL1/GAB1/RAP2C/SEMA5A/PTPRK/GNA12/ITGBL1/SLC9B2/TLR4/ATP1B2/VASH1/EPS8/BRAF/SOS1/ENAH/BCL2/SYK/ADARB1/ARPIN/TIAM1/ADORA3/SPRED1/SELL/XCR1/TCAF1/FGF10/TMEM18/IRAK4/THY1/WWC1/ZNF268/USP9X/WDR1/ACE/ADRA2A/FMNL3/ARPC5L/ZEB2/NEXN/FRMD5/RFX3/KIAA0319L/ING1/SH3RF2/RIPOR2/GCNT1/SOD2/FOXB1/PRKD1/TOP2B/SHROOM2/MEAK7/MAP3K7/SIRT1/SH3RF1/LRP12/SIN3A/TNFSF18/CATSPERE/SSX2IP/ITGA…	102
GO:0006511	ubiquitin-dependent protein catabolic process	49/967	91/1831	0.462956	0.999326	0.999326	WWTR1/RAD23B/WWP2/ERLEC1/ARMC8/UBE2Z/GNA12/YOD1/VPS36/FAM8A1/CANX/TOLLIP/KBTBD7/FEM1B/CUL4B/USP9X/WDR77/UBE3A/FBXL22/UBE2J1/RPGR/USP44/RNF150/ATE1/NDFIP2/SH3RF2/FBXW11/FBXO3/TMEM67/SIRT1/SH3RF1/FBXO48/CACUL1/DNAJC10/HDAC6/HFE/UBR1/WDR26/RC3H2/RNF130/TRIM13/ANAPC4/ANKRD9/UBR3/APPBP2/UBE2G1/KCTD13/SMURF2/PPP2R5C	49
GO:0019941	modification-dependent protein catabolic process	49/967	91/1831	0.462956	0.999326	0.999326	WWTR1/RAD23B/WWP2/ERLEC1/ARMC8/UBE2Z/GNA12/YOD1/VPS36/FAM8A1/CANX/TOLLIP/KBTBD7/FEM1B/CUL4B/USP9X/WDR77/UBE3A/FBXL22/UBE2J1/RPGR/USP44/RNF150/ATE1/NDFIP2/SH3RF2/FBXW11/FBXO3/TMEM67/SIRT1/SH3RF1/FBXO48/CACUL1/DNAJC10/HDAC6/HFE/UBR1/WDR26/RC3H2/RNF130/TRIM13/ANAPC4/ANKRD9/UBR3/APPBP2/UBE2G1/KCTD13/SMURF2/PPP2R5C	49
GO:0045664	regulation of neuron differentiation	15/967	27/1831	0.46431	0.999326	0.999326	BDNF/TCF4/HOXD3/BCL2/TIAM1/HEY2/ETV5/HEYL/BEND6/SIN3A/DIXDC1/SOCS2/DUOXA1/NEPRO/GPRC5B	15
GO:0072522	purine-containing compound biosynthetic process	15/967	27/1831	0.46431	0.999326	0.999326	NT5E/ACSL3/IDO1/SLC25A16/NAXD/IDO2/GCDH/AK4/SLC4A7/PRPS1/SLC25A13/PPARGC1A/NADSYN1/MLYCD/ELOVL7	15
GO:1905039	carboxylic acid transmembrane transport	15/967	27/1831	0.46431	0.999326	0.999326	SLC38A3/SLC7A6/CPT1A/SLC16A7/SLC19A1/SLC6A6/SLC1A2/SLC6A13/SFXN2/SLC16A9/SLC25A13/SLC11A1/SLC25A32/RGS2/SFXN1	15
GO:0030163	protein catabolic process	67/967	125/1831	0.464811	0.999326	0.999326	WWTR1/CTSC/FMR1/VIP/RAD23B/WWP2/ERLEC1/SPATA18/ARMC8/UBE2Z/GNA12/UTP25/YOD1/VPS36/FAM8A1/UGGT1/CANX/TOLLIP/KBTBD7/ZDHHC2/HGSNAT/FEM1B/CUL4B/PSME3IP1/USP9X/WDR77/UBE3A/ADRA2A/FBXL22/UBE2J1/RPGR/DNAJB12/USP44/CBLB/USP13/RNF150/UGGT2/ATE1/NDFIP2/SH3RF2/FBXW11/FBXO3/TMEM67/SIRT1/SH3RF1/FBXO48/CACUL1/MDM4/DNAJC10/HDAC6/HFE/UBR1/WDR91/WDR26/RC3H2/TIPARP/RNF130/TRIM13/ANAPC4/IDE/ANKRD9/UBR3/APPBP2/UBE2G…	67
GO:1901701	cellular response to oxygen-containing compound	67/967	125/1831	0.464811	0.999326	0.999326	INSIG1/SORBS1/HRH1/FAM210B/HGF/WNT7B/GAB1/RPTOR/PTPRK/ZNF236/SLC9B2/MAP2K6/TLR4/BRAF/CPT1A/SOS1/ARID1B/SH3BP4/TIAM1/KCNQ3/IP6K2/ACTN2/KDM6B/PTPN1/STAT1/IRAK4/PTPRE/AQP9/BECN1/ACE/ADRA2A/SYT6/EPHA5/SLC1A2/SOD2/CAPN10/PRKD1/TOP2B/STXBP4/MAP3K7/RAPGEF3/SIRT1/TIFAB/SETX/SIN3A/GRB14/TRERF1/PTGFR/HDAC6/CCR5/ZFAND1/UBR1/SNX6/CARD8/SOCS2/GNAZ/SYT11/AKAP9/FBXO32/MECP2/STAT5A/IDE/STAT5B/GFI1/ATP2B4/PTPRA/N…	67
GO:0001101	response to acid chemical	7/967	12/1831	0.464924	0.999326	0.999326	RPTOR/BCL2/SH3BP4/SLC1A2/MEAK7/UBR1/ATP2B4	7
GO:0010827	regulation of glucose transmembrane transport	7/967	12/1831	0.464924	0.999326	0.999326	SORBS1/BRAF/ACE/SLC1A2/CAPN10/STXBP4/ASPSCR1	7
GO:0046887	positive regulation of hormone secretion	7/967	12/1831	0.464924	0.999326	0.999326	SIRT3/FOXL2/CAPN10/PRKD1/TM7SF3/HFE/DOC2B	7
GO:0050848	regulation of calcium-mediated signaling	7/967	12/1831	0.464924	0.999326	0.999326	HTT/CAMTA1/DYRK2/SYK/SLC24A4/ATP2B4/STIMATE	7
GO:0050868	negative regulation of T cell activation	7/967	12/1831	0.464924	0.999326	0.999326	IDO1/CBLB/RIPOR2/TNFSF18/ARG2/HFE/RC3H2	7
GO:0060999	positive regulation of dendritic spine development	7/967	12/1831	0.464924	0.999326	0.999326	FMR1/CAPRIN1/STAU2/TIAM1/CAMK2B/MECP2/C21orf91	7
GO:0070585	protein localization to mitochondrion	7/967	12/1831	0.464924	0.999326	0.999326	MFF/HK1/TOMM22/MAVS/HUWE1/DNM1L/TOMM5	7
GO:0070918	regulatory ncRNA processing	7/967	12/1831	0.464924	0.999326	0.999326	METTL3/AGO1/AGO4/NCBP1/MECP2/NCBP2/PUS10	7
GO:0072329	monocarboxylic acid catabolic process	7/967	12/1831	0.464924	0.999326	0.999326	ETFBKMT/CPT1A/ACAD10/AIG1/GCDH/LDHD/MLYCD	7
GO:0140115	export across plasma membrane	7/967	12/1831	0.464924	0.999326	0.999326	ATP1B2/ABCC4/SLC22A5/ATP4B/SLC24A4/SLC29A4/KCNT2	7
GO:1903076	regulation of protein localization to plasma membrane	7/967	12/1831	0.464924	0.999326	0.999326	SORBS1/ACSL3/ZDHHC2/ATP2C1/STX7/ITGA3/ATP2B4	7
GO:0009792	embryo development ending in birth or egg hatching	32/967	59/1831	0.465008	0.999326	0.999326	SP3/WNT7B/RICTOR/GNA12/VASH1/HOXD3/STOX2/HEY2/KDM4C/IRX5/TMEM107/HOXB8/HOXA4/ACE/GORAB/POFUT1/FOXB1/HOXC6/APAF1/FZD1/PTPN18/SIN3A/FGF9/MMP16/YTHDC1/POGLUT1/SULF1/AKAP3/ANGPT1/UBR3/RPL7L1/SPECC1	32
GO:1901575	organic substance catabolic process	130/967	244/1831	0.465419	0.999326	0.999326	WWTR1/CTSC/FMR1/VIP/NT5E/CAPRIN1/HK1/RAD23B/WWP2/GLDC/APOBEC3D/ERLEC1/ALDH4A1/SPATA18/ARMC8/UBE2Z/ETFBKMT/RPTOR/APOBEC3F/LRPPRC/METTL3/GNA12/SNX25/NPM1/YTHDF1/UTP25/YOD1/VPS36/CPT1A/FTCD/FAM8A1/UGGT1/FOXL2/CANX/TOLLIP/GRSF1/KBTBD7/IDO1/PTPN1/ACAD10/ZDHHC2/THRA/HGSNAT/FEM1B/CUL4B/BECN1/PSME3IP1/USP9X/ALDH5A1/WDR77/DPYD/UBE3A/ACE/ADRA2A/KIF16B/SMPDL3B/BCO1/FBXL22/AGO1/UBE2J1/THRAP3/GPD1L/RPGR/DNAJB…	130
GO:0007267	cell-cell signaling	103/967	193/1831	0.465741	0.999326	0.999326	WWTR1/SIRT3/BDNF/FMR1/VIP/SLC24A1/TBC1D24/HRH1/STAU2/TTC21B/HGF/WNT7B/SEMA5A/KMT2A/FCHSD1/YTHDF1/SLC9B2/MAP2K6/BRAF/CPT1A/SLC6A1/GJC1/SYK/FOXL2/ABCC4/ADARB1/TIAM1/GLRB/ADORA3/KCNQ3/WWOX/FGF10/ZDHHC2/THY1/GABRA2/UBE3A/ACE/ADRA2A/SYT6/ZEB2/STXBP5/RFX3/DLGAP2/EPHA5/WNK2/DGKE/RAB11FIP3/SLC6A6/SLC1A2/FBXW11/TMEM108/GABRR2/CAPN10/TFAP2B/PRKD1/PTHLH/STXBP4/RAB11FIP1/TMEM67/FZD1/DNAJC5/TNFSF18/TM7SF3/ITG…	103
GO:0022604	regulation of cell morphogenesis	24/967	44/1831	0.46918	0.999326	0.999326	CAPRIN1/WTIP/TBC1D24/STAU2/GNA12/EPS8/ARPIN/TIAM1/ZMYM3/WDR1/FMNL3/MYO10/ZMYM6/AGO4/EPB41L3/CDKL3/HDAC6/ZNF135/ITGB2/CAMK2B/SYNE3/MECP2/MARK2/SS18L1	24
GO:0048666	neuron development	78/967	146/1831	0.473446	0.999326	0.999326	BDNF/FMR1/CAPRIN1/TBC1D24/STAU2/WNT7B/SEMA5A/YTHDF1/ATP1B2/SPAST/BRAF/SOS1/TBCD/ENAH/BCL2/ADARB1/TIAM1/KCNQ3/THY1/CUL4B/KALRN/BICDL1/BECN1/USP9X/FIG4/WHRN/NCS1/NEXN/EPHA5/EFHC2/TMEM108/SOD2/UHMK1/FOXB1/PRKD1/TOP2B/KCNA1/ST8SIA2/ZDHHC17/FZD1/LRP12/SETX/SIN3A/SULT4A1/TANC2/EPB41L3/CABP4/CDKL3/ITGA3/HDAC6/ADGRB3/PPFIA2/SLC4A7/GRIN3A/DZANK1/SF3A2/DRGX/B4GALT5/FSTL4/CAMK2B/CBFA2T2/FAT3/STRN/SRGAP2/MEC…	78
GO:0021700	developmental maturation	16/967	29/1831	0.473899	0.999326	0.999326	SHB/FAM210B/BCL2/KCNQ3/ATP6V1B2/BRD1/FEM1B/WDR77/TFCP2L1/RFX3/SLC24A4/CATSPERE/ADGRB3/B4GALT5/CAMK2B/MECP2	16
GO:0022898	regulation of transmembrane transporter activity	16/967	29/1831	0.473899	0.999326	0.999326	FMR1/HTT/WWP2/ATP1B2/BCL2/ACTN2/JPH2/TCAF1/ADRA2A/GPD1L/WNK2/CABP4/STIM1/AKAP9/NETO1/STIMATE	16
GO:0032868	response to insulin	16/967	29/1831	0.473899	0.999326	0.999326	INSIG1/SORBS1/GAB1/SOS1/PTPN1/STAT1/PTPRE/GCNT1/CAPN10/STXBP4/MEAK7/SIRT1/GRB14/SRSF4/IDE/PTPRA	16
GO:0009101	glycoprotein biosynthetic process	25/967	46/1831	0.476523	0.999326	0.999326	ABCA7/MGAT2/UGGT1/BCL2/ST3GAL3/EXTL3/B3GLCT/UBE2J1/FUT2/UGGT2/GCNT1/POFUT1/POMT1/ST8SIA2/FUT5/CANT1/HS2ST1/GALNT7/B4GALT5/POGLUT1/C1GALT1/DPY19L4/ARFGEF1/UST/FUT10	25
GO:0010975	regulation of neuron projection development	34/967	63/1831	0.477576	0.999326	0.999326	BDNF/CAPRIN1/TBC1D24/STAU2/SEMA5A/YTHDF1/ATP1B2/BRAF/TIAM1/THY1/NCS1/EFHC2/PRKD1/FZD1/SETX/TANC2/CDKL3/ITGA3/HDAC6/ADGRB3/PPFIA2/SF3A2/FSTL4/CAMK2B/CBFA2T2/FAT3/RGS2/MARK2/MUSK/ZFYVE27/IST1/GFI1/UST/SS18L1	34
GO:0043207	response to external biotic stimulus	70/967	131/1831	0.477752	0.999326	0.999326	FMR1/MX2/IRF4/G3BP2/IFNAR2/HK1/APOBEC3D/APOBEC3F/METTL3/SEC14L1/MAP2K6/TLR4/BCL2/SYK/ADARB1/TOLLIP/SPIRE1/NECTIN2/IDO1/PTPN1/IGHG3/FGF10/ABCC9/STAT1/IRAK4/ZDHHC11/C4B/BECN1/SLC22A5/CD209/EIF2AK2/ACE/IPO7/TRIM52/SMPDL3B/FKBP5/USP50/ATP4B/USP44/IFNGR1/NCR3/SOD2/ERBIN/MAVS/PRKD1/STXBP4/FBXO3/THBD/MAP3K7/TIFAB/TANK/SIN3A/TMEM229B/ARG2/ANKHD1/PTGFR/HMGA2/CCR5/JCHAIN/MCOLN2/CARD8/H2BC6/SLC11A1/TRIM13/N…	70
GO:0051707	response to other organism	70/967	131/1831	0.477752	0.999326	0.999326	FMR1/MX2/IRF4/G3BP2/IFNAR2/HK1/APOBEC3D/APOBEC3F/METTL3/SEC14L1/MAP2K6/TLR4/BCL2/SYK/ADARB1/TOLLIP/SPIRE1/NECTIN2/IDO1/PTPN1/IGHG3/FGF10/ABCC9/STAT1/IRAK4/ZDHHC11/C4B/BECN1/SLC22A5/CD209/EIF2AK2/ACE/IPO7/TRIM52/SMPDL3B/FKBP5/USP50/ATP4B/USP44/IFNGR1/NCR3/SOD2/ERBIN/MAVS/PRKD1/STXBP4/FBXO3/THBD/MAP3K7/TIFAB/TANK/SIN3A/TMEM229B/ARG2/ANKHD1/PTGFR/HMGA2/CCR5/JCHAIN/MCOLN2/CARD8/H2BC6/SLC11A1/TRIM13/N…	70
GO:0001959	regulation of cytokine-mediated signaling pathway	8/967	14/1831	0.479415	0.999326	0.999326	METTL3/SYK/PTPN1/MAVS/CARD8/ANGPT1/GFI1/IKBKB	8
GO:0002040	sprouting angiogenesis	8/967	14/1831	0.479415	0.999326	0.999326	CCBE1/SEMA5A/SPRED1/EPN2/TMEM215/STARD13/ANGPT1/APLNR	8
GO:0003300	cardiac muscle hypertrophy	8/967	14/1831	0.479415	0.999326	0.999326	TIAM1/HEY2/BECN1/JARID2/ATP2A2/RGS2/SORBS2/ATP2B4	8
GO:0009451	RNA modification	8/967	14/1831	0.479415	0.999326	0.999326	YRDC/APOBEC3D/APOBEC3F/METTL3/ADARB1/FTSJ1/ADAT2/PUS10	8
GO:0009913	epidermal cell differentiation	8/967	14/1831	0.479415	0.999326	0.999326	ERRFI1/EXTL3/HEY2/WHRN/ASAH1/POU2F3/SLC4A7/KAZN	8
GO:0010977	negative regulation of neuron projection development	8/967	14/1831	0.479415	0.999326	0.999326	SEMA5A/THY1/CDKL3/HDAC6/FSTL4/CBFA2T2/FAT3/GFI1	8
GO:0014896	muscle hypertrophy	8/967	14/1831	0.479415	0.999326	0.999326	TIAM1/HEY2/BECN1/JARID2/ATP2A2/RGS2/SORBS2/ATP2B4	8
GO:0014897	striated muscle hypertrophy	8/967	14/1831	0.479415	0.999326	0.999326	TIAM1/HEY2/BECN1/JARID2/ATP2A2/RGS2/SORBS2/ATP2B4	8
GO:0030833	regulation of actin filament polymerization	8/967	14/1831	0.479415	0.999326	0.999326	RICTOR/FCHSD1/EPS8/ARPC5L/FMN1/LMOD1/ARHGAP40/ARFGEF1	8
GO:0042472	inner ear morphogenesis	8/967	14/1831	0.479415	0.999326	0.999326	INSIG1/FGF10/WHRN/TIFAB/FGF9/ALDH1A3/FRZB/MYO3B	8
GO:0043281	regulation of cysteine-type endopeptidase activity involved in apoptotic process	8/967	14/1831	0.479415	0.999326	0.999326	HGF/SYK/FOXL2/APAF1/SIRT1/SH3RF1/CAAP1/CARD8	8
GO:0046661	male sex differentiation	8/967	14/1831	0.479415	0.999326	0.999326	BCL2/FGF10/ACE/WDR48/AGO4/FGF9/DNAAF11/STAT5B	8
GO:0051250	negative regulation of lymphocyte activation	8/967	14/1831	0.479415	0.999326	0.999326	IDO1/TNFRSF13B/CBLB/RIPOR2/TNFSF18/ARG2/HFE/RC3H2	8
GO:1903531	negative regulation of secretion by cell	8/967	14/1831	0.479415	0.999326	0.999326	FMR1/RAB33B/BRAF/ADRA2A/RAB11FIP3/RAB11FIP1/GNAZ/SYT11	8
GO:0032388	positive regulation of intracellular transport	17/967	31/1831	0.482843	0.999326	0.999326	MFF/KHDRBS1/ACTN2/TCAF1/ZDHHC2/STX18/CAPN10/MAVS/PRKD1/RAPGEF3/HUWE1/MIEF1/ZFAND1/ITGB2/MECP2/NCBP2/PPM1A	17
GO:0048562	embryonic organ morphogenesis	17/967	31/1831	0.482843	0.999326	0.999326	INSIG1/SP3/HOXD3/FOXL2/SETDB2/IRX5/FGF10/HOXB8/HOXA4/WHRN/TIFAB/FGF9/MMP16/ALDH1A3/FRZB/APLNR/MYO3B	17
GO:0010498	proteasomal protein catabolic process	44/967	82/1831	0.483313	0.999326	0.999326	WWTR1/FMR1/RAD23B/WWP2/ERLEC1/ARMC8/GNA12/YOD1/FAM8A1/UGGT1/CANX/KBTBD7/FEM1B/CUL4B/PSME3IP1/USP9X/UBE3A/FBXL22/UBE2J1/DNAJB12/USP44/USP13/UGGT2/ATE1/SH3RF2/FBXW11/FBXO3/TMEM67/SIRT1/SH3RF1/FBXO48/DNAJC10/HFE/UBR1/WDR26/TRIM13/ANAPC4/ANKRD9/UBR3/APPBP2/UBE2G1/KCTD13/SMURF2/PPP2R5C	44
GO:0120035	regulation of plasma membrane bounded cell projection organization	44/967	82/1831	0.483313	0.999326	0.999326	BDNF/FMR1/HTT/CAPRIN1/TBC1D24/STAU2/SEMA5A/YTHDF1/ATP1B2/EPS8/BRAF/ARPIN/TIAM1/THY1/NCS1/PLD1/EFHC2/RAB11FIP3/RIPOR2/PRKD1/MYO10/FZD1/SETX/TANC2/CDKL3/PLEKHM1/ITGA3/HDAC6/ADGRB3/PPFIA2/SF3A2/FSTL4/CAMK2B/CBFA2T2/FAT3/RGS2/MARK2/MUSK/ZFYVE27/IST1/GFI1/UST/MYO3B/SS18L1	44
GO:0006979	response to oxidative stress	26/967	48/1831	0.483557	0.999326	0.999326	TBC1D24/STAU2/HGF/PTPRK/PTGS1/BCL2/VKORC1L1/KDM6B/STAT1/ETV5/BECN1/IPCEF1/GPX8/SOD2/PRKD1/TOP2B/MEAK7/SIRT1/SETX/SIN3A/PNPT1/HDAC6/PPARGC1A/ATP2A2/NET1/STX2	26
GO:0045893	positive regulation of DNA-templated transcription	109/967	205/1831	0.486577	0.999326	0.999326	WWTR1/SRA1/IRF4/CAMTA1/PTOV1/WWP2/TCF4/SP3/SLC38A3/HGF/TP53BP1/PKNOX1/RPTOR/RAP2C/RAX/E2F5/KMT2A/NPM1/WDR43/GMEB2/STK16/TLR4/ZNF493/UBTF/HOXD3/FOXL2/ARID1B/ZNF516/ZNF208/ACTN2/HEY2/KDM6B/KDM4C/CAND1/WWOX/ELK4/FGF10/THRA/STAT1/WWC1/ZNF496/ETV5/ETV6/ZNF268/WDR77/ZNF300/HOXA4/UBE3A/ASXL1/TRIM52/AGO1/THRAP3/FHL5/HEYL/ZEB2/NFYB/ZNF507/TFCP2L1/RFX3/ING1/FBXW11/ZNF197/TFAP2B/MAVS/PRKD1/MOSPD1/TRRAP/PRDM…	109
GO:0007015	actin filament organization	27/967	50/1831	0.490309	0.999326	0.999326	SORBS1/ARHGAP6/SEMA5A/RICTOR/FCHSD1/TPM4/EPS8/BRAF/ENAH/BCL2/ARPIN/ACTN2/SPIRE1/ALMS1/WDR1/RHPN2/ARPC5L/ZEB2/SHROOM2/FMN1/RAPGEF3/GPR65/WHAMM/LMOD1/ARHGAP40/ARFGEF1/KCTD13	27
GO:0048513	animal organ development	166/967	313/1831	0.490569	0.999326	0.999326	WWTR1/TTBK2/INSIG1/NECTIN3/CCBE1/ERRFI1/STAU2/SP3/ANKRD11/TTC21B/HGF/WNT7B/PKNOX1/SEMA5A/METTL3/RAX/KMT2A/AFF2/YWHAQ/SLC9B2/RAB33B/MAP2K6/ATP1B2/UTP25/VASH1/BRAF/CPT1A/SOS1/GJC1/HOXD3/BCL2/SYK/FOXL2/ADARB1/FPGS/ZNF516/TIAM1/EXTL3/NBR1/STOX2/ACTN2/SPRED1/HEY2/KDM6B/SETDB2/JPH2/WWOX/IRX5/TMEM107/FGF10/THRA/ABCC9/HOXB8/STAT1/THY1/TPH1/MCPH1/FEM1B/SMCHD1/WDR77/HOXA4/UBE3A/ACE/ASXL1/WDR89/WHRN/RFX8/HE…	166
GO:0021761	limbic system development	9/967	16/1831	0.491926	0.999326	0.999326	RAX/KDM6B/EPHA5/TMEM108/FOXB1/KCNA1/ALDH1A3/MECP2/ATP2B4	9
GO:0031123	RNA 3'-end processing	9/967	16/1831	0.491926	0.999326	0.999326	INTS7/GRSF1/ERI1/RPRD1A/INTS2/PNPT1/YTHDC1/NCBP1/NCBP2	9
GO:0031644	regulation of nervous system process	9/967	16/1831	0.491926	0.999326	0.999326	CTSC/FMR1/TBC1D24/ACP3/FIG4/DLGAP2/TMEM108/IGSF11/NETO1	9
GO:0032411	positive regulation of transporter activity	9/967	16/1831	0.491926	0.999326	0.999326	HTT/ATP1B2/ACTN2/JPH2/TCAF1/WNK2/STIM1/AKAP9/STIMATE	9
GO:0032414	positive regulation of ion transmembrane transporter activity	9/967	16/1831	0.491926	0.999326	0.999326	HTT/ATP1B2/ACTN2/JPH2/TCAF1/WNK2/STIM1/AKAP9/STIMATE	9
GO:0045766	positive regulation of angiogenesis	9/967	16/1831	0.491926	0.999326	0.999326	CCBE1/GAB1/SEMA5A/PRKD1/RAPGEF3/SIRT1/STIM1/HMGA2/APLNR	9
GO:0048814	regulation of dendrite morphogenesis	9/967	16/1831	0.491926	0.999326	0.999326	CAPRIN1/TBC1D24/STAU2/TIAM1/CDKL3/HDAC6/ADGRB3/CAMK2B/SS18L1	9
GO:0050806	positive regulation of synaptic transmission	9/967	16/1831	0.491926	0.999326	0.999326	FMR1/SLC24A1/YTHDF1/BRAF/ZDHHC2/HDAC6/IGSF11/MECP2/KCTD13	9
GO:0050852	T cell receptor signaling pathway	9/967	16/1831	0.491926	0.999326	0.999326	SHB/BRAF/KHDRBS1/NECTIN2/THY1/CBLB/MAP3K7/RC3H2/IKBKB	9
GO:0051048	negative regulation of secretion	9/967	16/1831	0.491926	0.999326	0.999326	FMR1/RAB33B/BRAF/ADRA2A/RAB11FIP3/RAB11FIP1/TIFAB/GNAZ/SYT11	9
GO:0051897	positive regulation of phosphatidylinositol 3-kinase/protein kinase B signal transduction	9/967	16/1831	0.491926	0.999326	0.999326	HGF/SEMA5A/RICTOR/EXTL3/BECN1/SIRT1/ANGPT1/MUSK/CASS4	9
GO:0060993	kidney morphogenesis	9/967	16/1831	0.491926	0.999326	0.999326	WWTR1/WNT7B/BCL2/FGF10/STAT1/ASXL1/GCNT1/FMN1/HS2ST1	9
GO:0090263	positive regulation of canonical Wnt signaling pathway	9/967	16/1831	0.491926	0.999326	0.999326	TTC21B/SEMA5A/FGF10/ZEB2/WNK2/FGF9/GPRC5B/PPM1A/SMURF2	9
GO:1903046	meiotic cell cycle process	9/967	16/1831	0.491926	0.999326	0.999326	RAD50/TESMIN/SMC4/SPIRE1/MARF1/TOP2B/AGO4/HSF2BP/MSH6	9
GO:1904018	positive regulation of vasculature development	9/967	16/1831	0.491926	0.999326	0.999326	CCBE1/GAB1/SEMA5A/PRKD1/RAPGEF3/SIRT1/STIM1/HMGA2/APLNR	9
GO:0010256	endomembrane system organization	37/967	69/1831	0.495051	0.999326	0.999326	HTT/VTI1A/ABCA7/ATP8B2/RAB33B/GORASP2/SPAST/VPS36/VAMP4/CCDC136/NECTIN2/SNX18/TMEM127/USP50/STX18/PRKD1/TMCC1/HUWE1/VTA1/HPS5/EPB41L3/WHAMM/SURF4/ESYT3/DOC2B/TOR1AIP1/ATP2A2/SYT11/AKAP9/RETREG1/RAB22A/VCPIP1/ZFYVE27/IST1/ARFGEF1/STX2/AGFG1	37
GO:0030031	cell projection assembly	37/967	69/1831	0.495051	0.999326	0.999326	WWTR1/TTBK2/FMR1/HTT/STAU2/TTC21B/EPS8/BBOF1/CC2D2B/ABCC4/ACTN2/WDR35/KIF3A/TMEM107/IFT22/PTPDC1/RPGR/FMNL3/PLD1/RFX3/GORAB/RAB11FIP3/RIPOR2/RABL2B/MYO10/TMEM67/JHY/SSX2IP/PLEKHM1/WHAMM/CCDC65/HDAC6/POC1B/DNHD1/SRGAP2/DNAAF11/MYO3B	37
GO:0030162	regulation of proteolysis	28/967	52/1831	0.496803	0.999326	0.999326	CTSC/FMR1/SERPINB8/CCBE1/RAD23B/HGF/GNA12/SYK/FOXL2/GSAP/PSME3IP1/USP9X/UBE3A/ADRA2A/USP50/USP13/SH3RF2/FBXW11/APAF1/SIRT1/SH3RF1/TANK/HDAC6/CAAP1/HFE/CARD8/CAST/IST1	28
GO:0019637	organophosphate metabolic process	47/967	88/1831	0.498576	0.999326	0.999326	AGPAT5/NT5E/HK1/HRH1/ACSL3/RPTOR/KCNAB2/ACP3/HMGCS1/TTC7A/INPP4B/IP6K2/ATP6V1B2/IDO1/SLC25A16/BECN1/FIG4/DPYD/SMPDL3B/GPD1L/PLD1/MTMR1/NAXD/DGKE/IDO2/ENTPD4/PTHLH/GCDH/AK4/SPTLC1/ABHD12B/ENPP6/SLC4A7/FMO5/SULT1A1/PRPS1/EFR3A/SLC25A13/SOCS2/PPARGC1A/MECP2/ME2/DNM1L/GLYCTK/NADSYN1/MLYCD/ELOVL7	47
GO:0030182	neuron differentiation	94/967	177/1831	0.499116	0.999326	0.999326	BDNF/FMR1/CAPRIN1/TBC1D24/STAU2/TCF4/TTC21B/ACSL3/WNT7B/SEMA5A/YTHDF1/ATP1B2/SPAST/BRAF/SOS1/TBCD/ENAH/HOXD3/BCL2/ADARB1/TIAM1/KCNQ3/HEY2/IRX5/THY1/CUL4B/ETV5/KALRN/BICDL1/BECN1/USP9X/FIG4/WHRN/NCS1/HEYL/NEXN/EPHA5/EFHC2/TMEM108/SOD2/UHMK1/FOXB1/MYEF2/PRKD1/TOP2B/KCNA1/ST8SIA2/BEND6/ZDHHC17/FZD1/LRP12/SETX/SIN3A/SULT4A1/TANC2/EPB41L3/CABP4/CDKL3/ITGA3/HDAC6/ADGRB3/PPFIA2/SLC4A7/GRIN3A/DZANK1/DIXD…	94
GO:0072659	protein localization to plasma membrane	19/967	35/1831	0.499128	0.999326	0.999326	SYS1/NECTIN3/SORBS1/ACSL3/GORASP2/TTC7A/FCHO2/ACTN2/ZDHHC2/MAP7/ATP2C1/STX7/ARFRP1/EPB41L3/ITGA3/EFR3A/ZFYVE27/ATP2B4/IKBKB	19
GO:0002262	myeloid cell homeostasis	10/967	18/1831	0.502965	0.999326	0.999326	SP3/FAM210B/PKNOX1/THRA/STAT1/BRD1/ZFPM1/SLC25A40/SFXN1/STAT5B	10
GO:0007626	locomotory behavior	10/967	18/1831	0.502965	0.999326	0.999326	EPS8/GLRB/IDO1/HOXB8/FIG4/SOD2/ALDH1A3/STRN/MECP2/SPG11	10
GO:0008286	insulin receptor signaling pathway	10/967	18/1831	0.502965	0.999326	0.999326	SORBS1/GAB1/SOS1/PTPN1/PTPRE/STXBP4/SIRT1/GRB14/IDE/PTPRA	10
GO:0022618	protein-RNA complex assembly	10/967	18/1831	0.502965	0.999326	0.999326	WDR77/AGO1/SETX/AGO4/SF3A1/SHQ1/SF3A2/YTHDC1/NCBP1/USP4	10
GO:0035264	multicellular organism growth	10/967	18/1831	0.502965	0.999326	0.999326	WWTR1/SOS1/BCL2/ADARB1/WDR48/SLC1A2/RC3H2/SOCS2/STAT5A/STAT5B	10
GO:0044409	entry into host	10/967	18/1831	0.502965	0.999326	0.999326	NECTIN3/WWP2/EXOC7/NECTIN2/CD209/EXOC2/CCR5/IDE/NECTIN1/NCAM1	10
GO:0015849	organic acid transport	29/967	54/1831	0.503059	0.999326	0.999326	SLC38A3/ACSL3/SLC7A6/RBP5/MAP2K6/FABP5P3/CPT1A/SLC6A1/SYK/SLCO2A1/ABCC4/SLC16A7/AQP9/ACE/SFXN5/SLC19A1/SLC6A6/SLC1A2/SLCO3A1/SLC6A13/SFXN2/SLC29A4/SLC10A7/SLC16A9/SLC25A13/SLC11A1/SLC25A32/RGS2/SFXN1	29
GO:0032940	secretion by cell	48/967	90/1831	0.503445	0.999326	0.999326	SIRT3/FMR1/VIP/SLC38A3/EXOC7/SLC9B2/TMEM167A/RAB33B/MAP2K6/TLR4/BRAF/CPT1A/SYK/FOXL2/ABCC4/TIAM1/CANX/ADORA3/FGF10/TPH1/ADRA2A/SYT6/STXBP5/EXOC2/RFX3/EPHA5/TANGO6/RAB11FIP3/CAPN10/TFAP2B/PRKD1/STXBP4/RAB11FIP1/DNAJC5/TM7SF3/PPFIA2/HFE/ITGB2/DOC2B/PDIA4/ATP2A2/GNAZ/SYT11/MECP2/DNM1L/ARFGEF1/LIN7A/STX2	48
GO:0035295	tube development	58/967	109/1831	0.505845	0.999326	0.999326	WWTR1/CCBE1/ERRFI1/SHB/SP3/WNT7B/GAB1/PKNOX1/SEMA5A/VASH1/SOS1/GJC1/BCL2/SYK/SPRED1/HEY2/SETDB2/TMEM107/FGF10/THRA/STAT1/THY1/ACE/ASXL1/AGO1/FMNL3/HEYL/EPN2/WDR48/GORAB/POFUT1/TFAP2B/FOXB1/PRKD1/FMN1/APAF1/RAPGEF3/SIRT1/FZD1/STIM1/ARG2/ITGA3/HMGA2/ADGRB3/HS2ST1/HTATIP2/FGF9/RC3H2/TIPARP/TMEM215/SULF1/STARD13/C1GALT1/CBFA2T2/ANGPT1/MECP2/APLNR/ATP2B4	58
GO:1903311	regulation of mRNA metabolic process	20/967	37/1831	0.506596	0.999326	0.999326	RBM25/FMR1/VIP/CAPRIN1/METTL3/NPM1/YTHDF1/KHDRBS1/WDR77/THRAP3/PNPT1/SRSF4/RC3H2/TNRC6B/YTHDC1/RBFOX1/SLC11A1/NCBP1/NCBP2/FASTKD1	20
GO:0043632	modification-dependent macromolecule catabolic process	49/967	92/1831	0.508212	0.999326	0.999326	WWTR1/RAD23B/WWP2/ERLEC1/ARMC8/UBE2Z/GNA12/YOD1/VPS36/FAM8A1/CANX/TOLLIP/KBTBD7/FEM1B/CUL4B/USP9X/WDR77/UBE3A/FBXL22/UBE2J1/RPGR/USP44/RNF150/ATE1/NDFIP2/SH3RF2/FBXW11/FBXO3/TMEM67/SIRT1/SH3RF1/FBXO48/CACUL1/DNAJC10/HDAC6/HFE/UBR1/WDR26/RC3H2/RNF130/TRIM13/ANAPC4/ANKRD9/UBR3/APPBP2/UBE2G1/KCTD13/SMURF2/PPP2R5C	49
GO:0002253	activation of immune response	30/967	56/1831	0.509095	0.999326	0.999326	IRF4/SHB/SEC14L1/MAP2K6/TLR4/BRAF/SOS1/BCL2/SYK/KHDRBS1/NECTIN2/IGHG3/IRAK4/THY1/C4B/EIF2AK2/SMPDL3B/USP50/CBLB/NCR3/ERBIN/MAVS/PRKD1/MAP3K7/SIN3A/RC3H2/GCSAM/CARD8/GFI1/IKBKB	30
GO:0003013	circulatory system process	40/967	75/1831	0.511122	0.999326	0.999326	WWTR1/HRH1/SLC38A3/GNA12/MAP2K6/ATP1B2/PTGS1/SLC6A1/GJC1/ABCC4/ADORA3/HEY2/THRA/ABCC9/STAT1/SLC16A7/SLC22A5/ACE/ADRA2A/GPD1L/SLC19A1/ZEB2/SLC6A6/SLC1A2/F5/SOD2/SLCO3A1/SLC6A13/SLC29A4/RNLS/UTS2B/ATP2A2/AKAP9/FGFBP3/ANGPT1/MECP2/RGS2/DNM1L/ATP2B4/KCNJ5	40
GO:0014074	response to purine-containing compound	11/967	20/1831	0.512867	0.999326	0.999326	NT5E/BRAF/SLC6A1/ABCC9/STAT1/AQP9/TOP2B/THBD/RAPGEF3/PNPT1/AKAP9	11
GO:0016570	histone modification	11/967	20/1831	0.512867	0.999326	0.999326	KMT2A/KDM6B/SETDB2/NFYB/MAP3K7/SIRT1/HDAC6/PPARGC1A/RBBP7/SET/MECP2	11
GO:0042180	cellular ketone metabolic process	11/967	20/1831	0.512867	0.999326	0.999326	INSIG1/ETFBKMT/CPT1A/VKORC1L1/IDO1/IDO2/SIRT1/PPARGC1A/STAT5B/ATP2B4/MLYCD	11
GO:0044000	movement in host	11/967	20/1831	0.512867	0.999326	0.999326	NECTIN3/WWP2/EXOC7/NECTIN2/CD209/EXOC2/CCR5/IDE/IST1/NECTIN1/NCAM1	11
GO:0045598	regulation of fat cell differentiation	11/967	20/1831	0.512867	0.999326	0.999326	WWTR1/INSIG1/TPH1/ASXL1/PTPRQ/SOD2/SIRT1/HDAC6/WDFY2/PTGR3/FRZB	11
GO:0050684	regulation of mRNA processing	11/967	20/1831	0.512867	0.999326	0.999326	RBM25/FMR1/NPM1/KHDRBS1/WDR77/THRAP3/SRSF4/YTHDC1/RBFOX1/NCBP1/NCBP2	11
GO:0060998	regulation of dendritic spine development	11/967	20/1831	0.512867	0.999326	0.999326	FMR1/CAPRIN1/STAU2/TIAM1/TANC2/PPFIA2/GRIN3A/FSTL4/CAMK2B/MECP2/C21orf91	11
GO:0106106	cold-induced thermogenesis	11/967	20/1831	0.512867	0.999326	0.999326	IRF4/MAP2K6/TLR4/SYK/ZNF516/KDM6B/ALMS1/THRA/SFXN5/KSR2/PPARGC1A	11
GO:0120161	regulation of cold-induced thermogenesis	11/967	20/1831	0.512867	0.999326	0.999326	IRF4/MAP2K6/TLR4/SYK/ZNF516/KDM6B/ALMS1/THRA/SFXN5/KSR2/PPARGC1A	11
GO:1903305	regulation of regulated secretory pathway	11/967	20/1831	0.512867	0.999326	0.999326	FMR1/BRAF/SYK/ADRA2A/SYT6/STXBP5/PPFIA2/ITGB2/DOC2B/ATP2A2/SYT11	11
GO:0019216	regulation of lipid metabolic process	21/967	39/1831	0.513683	0.999326	0.999326	INSIG1/SIRT3/SORBS1/ACSL3/ABCA7/ETFBKMT/RPTOR/CPT1A/THRA/ADRA2A/MTMR1/PRKD1/ASAH1/PSAPL1/SIRT1/FMO5/PPARGC1A/HULC/STAT5B/GFI1/MLYCD	21
GO:0030522	intracellular receptor signaling pathway	21/967	39/1831	0.513683	0.999326	0.999326	SEC14L1/MAP2K6/TLR4/KDM4C/THRA/IRAK4/EIF2AK2/UBE3A/ASXL1/USP50/HEYL/UFSP2/ERBIN/MAVS/PRKD1/MAP3K7/SIRT1/TRERF1/HDAC6/CARD8/IKBKB	21
GO:0032103	positive regulation of response to external stimulus	31/967	58/1831	0.514926	0.999326	0.999326	CTSC/IRF4/SEMA5A/SEC14L1/MAP2K6/TLR4/BRAF/SYK/TIAM1/NECTIN2/IDO1/FGF10/IRAK4/EIF2AK2/SMPDL3B/USP50/RIPOR2/NCR3/ERBIN/MAVS/PRKD1/THBD/MAP3K7/SIN3A/TNFSF18/CARD8/DNM1L/STAT5B/GFI1/GPRC5B/IKBKB	31
GO:0007276	gamete generation	41/967	77/1831	0.516206	0.999326	0.999326	VIPAS39/AFF4/RNF2/RAD23B/STAU2/SHB/METTL3/TESMIN/GORASP2/RAI14/SOS1/BCL2/FOXL2/KHDRBS1/SPIRE1/CCDC136/NECTIN2/ETV5/ETV6/USP9X/WDR77/ACE/UBE2J1/MARF1/WDR48/FBXW11/ADAM28/SIRT1/SETX/AGO4/CATSPERE/HSF2BP/CATSPERG/ZDBF2/TDRP/YTHDC1/DNHD1/RGS2/ATP2B4/MSH6/AGFG1	41
GO:0048731	system development	243/967	460/1831	0.519064	0.999326	0.999326	WWTR1/TTBK2/INSIG1/CTSC/NECTIN3/BDNF/FMR1/CAPRIN1/TBC1D24/CCBE1/ERRFI1/STAU2/SHB/TCF4/SP3/ANKRD11/TTC21B/HGF/ACSL3/WNT7B/TP53BP1/GAB1/PKNOX1/SEMA5A/METTL3/RAX/KMT2A/TRAK2/AFF2/YTHDF1/YWHAQ/IGSF9B/SLC9B2/RAB33B/MAP2K6/TLR4/ATP1B2/VASH1/SPAST/BTD/SERF1B/BRAF/CPT1A/SOS1/TBCD/GJC1/ENAH/HOXD3/BCL2/SYK/FOXL2/ARID1B/ADARB1/FPGS/TIAM1/GLRB/BHLHE40/SHLD2/KCNQ3/ACTN2/SPRED1/HEY2/KDM6B/SETDB2/JPH2/WWOX/IDO1…	243
GO:0050673	epithelial cell proliferation	22/967	41/1831	0.52043	0.999326	0.999326	VIP/HGF/RPTOR/SEMA5A/RICTOR/PTPRK/VASH1/FGF10/STAT1/C6orf89/WDR77/ZEB2/FUT2/WDR48/PRKD1/STXBP4/SIRT1/HDAC6/FGF9/SULF1/STAT5A/APLNR	22
GO:0006952	defense response	81/967	153/1831	0.520983	0.999326	0.999326	CTSC/MX2/IRF4/G3BP2/NT5E/IFNAR2/HK1/HRH1/APOBEC3D/HGF/APOBEC3F/RICTOR/METTL3/SEC14L1/MAP2K6/TLR4/BCL2/SYK/ADARB1/ADORA3/EXTL3/TOLLIP/SPIRE1/XCR1/KDM6B/NECTIN2/IDO1/PTPN1/IGHG3/SP140/ABCC9/STAT1/IRAK4/ZDHHC11/MCPH1/C4B/BECN1/SLC22A5/CD209/EIF2AK2/IPO7/TRIM52/SMPDL3B/USP50/USP44/ZEB2/IFNGR1/NCR3/ERBIN/MAVS/PRKD1/STXBP4/MAP3K7/TANK/SIN3A/TNFSF18/ARG2/ANKHD1/PTGFR/ACKR2/CCR5/STAT4/HFE/JCHAIN/CAMK4/IT…	81
GO:0002703	regulation of leukocyte mediated immunity	12/967	22/1831	0.521866	0.999326	0.999326	TP53BP1/TLR4/SYK/SHLD2/NECTIN2/STX7/NCR3/MAVS/MAP3K7/HFE/ITGB2/STAT5B	12
GO:0006665	sphingolipid metabolic process	12/967	22/1831	0.521866	0.999326	0.999326	SIRT3/ST3GAL3/SMPDL3B/PRKD1/ASAH1/PSAPL1/ST8SIA2/FUT5/SPTLC1/B4GALT5/ELOVL7/ASAH2	12
GO:0007599	hemostasis	12/967	22/1831	0.521866	0.999326	0.999326	TFPI2/GNA12/TLR4/SYK/TPH1/ADRA2A/DGKE/F5/THBD/HPS5/ENPP4/MMRN1	12
GO:0016485	protein processing	12/967	22/1831	0.521866	0.999326	0.999326	CCBE1/PSEN2/ACE/ERO1B/KLK13/SPG7/METAP2/THBD/MMP16/CARD8/CAST/TLL1	12
GO:0030323	respiratory tube development	12/967	22/1831	0.521866	0.999326	0.999326	CCBE1/ERRFI1/SP3/WNT7B/FGF10/THRA/ACE/ASXL1/ITGA3/FGF9/RC3H2/MECP2	12
GO:0030324	lung development	12/967	22/1831	0.521866	0.999326	0.999326	CCBE1/ERRFI1/SP3/WNT7B/FGF10/THRA/ACE/ASXL1/ITGA3/FGF9/RC3H2/MECP2	12
GO:0052547	regulation of peptidase activity	12/967	22/1831	0.521866	0.999326	0.999326	SERPINB8/HGF/SYK/FOXL2/USP50/APAF1/SIRT1/SH3RF1/TANK/CAAP1/CARD8/CAST	12
GO:1905475	regulation of protein localization to membrane	12/967	22/1831	0.521866	0.999326	0.999326	MFF/SORBS1/ACSL3/TCAF1/ZDHHC2/ATP2C1/STX7/MIEF1/ITGA3/ITGB2/MESD/ATP2B4	12
GO:0051240	positive regulation of multicellular organismal process	92/967	174/1831	0.52555	0.999326	0.999326	WWTR1/CTSC/BDNF/IRF4/VIP/CAPRIN1/HK1/TBC1D24/CCBE1/HRH1/STAU2/SHB/HGF/TP53BP1/GAB1/ABCA7/RPTOR/TNFRSF13C/SEMA5A/SLC9B2/TLR4/UTP25/BRAF/BCL2/SYK/FOXL2/ARID1B/ZNF516/TIAM1/SHLD2/HEY2/KDM6B/NECTIN2/IDO1/ALMS1/FGF10/THRA/STAT1/THY1/ETV5/BECN1/SLC22A5/CD209/EIF2AK2/ACE/ADRA2A/SFXN5/USP50/CBLB/RFX3/ING1/IFNGR1/MAVS/PRKD1/THBD/ST8SIA2/MAP3K7/RAPGEF3/SIRT1/TANK/SIN3A/KSR2/ENPP4/STIM1/CDKL3/PLEKHM1/HDAC6/…	92
GO:0032870	cellular response to hormone stimulus	33/967	62/1831	0.526034	0.999326	0.999326	INSIG1/SRA1/SORBS1/GAB1/SOS1/ARID1B/ACTN2/KDM4C/PTPN1/THRA/STAT1/PTPRE/UBE3A/ACE/ADRA2A/HEYL/UFSP2/CAPN10/PRKD1/STXBP4/MAP3K7/SIRT1/GRB14/TRERF1/PTGFR/HDAC6/SOCS2/FBXO32/STAT5A/IDE/SFR1/STAT5B/PTPRA	33
GO:2001233	regulation of apoptotic signaling pathway	23/967	43/1831	0.52687	0.999326	0.999326	CTSC/BDNF/HTT/HGF/TLR4/EEF1E1/BCL2/ING5/WWOX/PTPN1/FGF10/FEM1B/BECN1/SOD2/APAF1/SIRT1/SH3RF1/TIFAB/FZD1/CAAP1/STRADB/DNM1L/ASAH2	23
GO:0034249	negative regulation of amide metabolic process	13/967	24/1831	0.53013	0.999326	0.999326	FMR1/CAPRIN1/WTIP/ABCA7/METTL3/YTHDF1/EIF2AK2/AGO1/AGO4/PNPT1/RC3H2/TNRC6B/RGS2	13
GO:0048284	organelle fusion	13/967	24/1831	0.53013	0.999326	0.999326	MFF/VIPAS39/VTI1A/VAMP4/VPS41/STX7/HUWE1/PLEKHM1/DOC2B/SYT11/VCPIP1/STX2/SPG11	13
GO:0050679	positive regulation of epithelial cell proliferation	13/967	24/1831	0.53013	0.999326	0.999326	VIP/RPTOR/SEMA5A/RICTOR/FGF10/WDR48/PRKD1/STXBP4/SIRT1/HDAC6/FGF9/STAT5A/APLNR	13
GO:1903008	organelle disassembly	13/967	24/1831	0.53013	0.999326	0.999326	HTT/SPATA18/SPATA33/SPAST/KLC1/BECN1/SNX7/HUWE1/HDAC6/ZFAND1/RETREG1/MARK2/DNM1L	13
GO:0030097	hemopoiesis	54/967	102/1831	0.530666	0.999326	0.999326	AGPAT5/IRF4/SHB/SP3/FAM210B/PKNOX1/RPTOR/METTL3/KMT2A/SLC9B2/TLR4/BRAF/SOS1/BCL2/SYK/ING5/ARID1B/TTC7A/SLC7A6OS/THRA/HOXB8/STAT1/BRD1/TNFRSF13B/ETV6/EIF2AK2/WDR1/ACE/ASXL1/USP44/SOD2/TOP2B/WDR7/SIRT1/SH3RF1/TIFAB/SIN3A/TNFSF18/TNFRSF9/ZFPM1/MITF/STAT4/CAMK4/SLC25A40/RC3H2/TIPARP/RABL3/KAT6B/ANGPT1/NHEJ1/STAT5A/SFXN1/STAT5B/FUT10	54
GO:0010608	post-transcriptional regulation of gene expression	34/967	64/1831	0.531335	0.999326	0.999326	FMR1/VIP/CAPRIN1/WTIP/EIF4E3/LRPPRC/METTL3/NPM1/YTHDF1/BZW2/MIR29B2CHG/KHDRBS1/EIF2AK2/ACE/BACE1-AS/AGO1/THRAP3/PTCD3/PLD1/UHMK1/MTG2/AGO4/PNPT1/POLDIP3/NIBAN1/RC3H2/TNRC6B/YTHDC1/SLC11A1/NCBP1/MECP2/RGS2/NCBP2/FASTKD1	34
GO:0071417	cellular response to organonitrogen compound	35/967	66/1831	0.536481	0.999326	0.999326	INSIG1/SORBS1/HRH1/GAB1/RPTOR/TLR4/SOS1/ARID1B/SH3BP4/ACTN2/PTPN1/STAT1/PTPRE/AQP9/SLC1A2/CAPN10/PRKD1/TOP2B/STXBP4/MAP3K7/RAPGEF3/SIRT1/SIN3A/GRB14/UBR1/SNX6/SOCS2/GNAZ/AKAP9/MECP2/STAT5A/IDE/STAT5B/ATP2B4/PTPRA	35
GO:0002263	cell activation involved in immune response	14/967	26/1831	0.537784	0.999326	0.999326	IRF4/SHB/TP53BP1/KMT2A/TLR4/SYK/SHLD2/TNFSF18/ZFPM1/STAT4/ITGB2/RC3H2/SLC11A1/MSH6	14
GO:0002366	leukocyte activation involved in immune response	14/967	26/1831	0.537784	0.999326	0.999326	IRF4/SHB/TP53BP1/KMT2A/TLR4/SYK/SHLD2/TNFSF18/ZFPM1/STAT4/ITGB2/RC3H2/SLC11A1/MSH6	14
GO:0009165	nucleotide biosynthetic process	14/967	26/1831	0.537784	0.999326	0.999326	ACSL3/IDO1/SLC25A16/NAXD/IDO2/GCDH/AK4/SLC4A7/PRPS1/SLC25A13/PPARGC1A/NADSYN1/MLYCD/ELOVL7	14
GO:1901293	nucleoside phosphate biosynthetic process	14/967	26/1831	0.537784	0.999326	0.999326	ACSL3/IDO1/SLC25A16/NAXD/IDO2/GCDH/AK4/SLC4A7/PRPS1/SLC25A13/PPARGC1A/NADSYN1/MLYCD/ELOVL7	14
GO:1903532	positive regulation of secretion by cell	14/967	26/1831	0.537784	0.999326	0.999326	SIRT3/VIP/MAP2K6/TLR4/SYK/FOXL2/STXBP5/CAPN10/PRKD1/TM7SF3/HFE/ITGB2/DOC2B/DNM1L	14
GO:0001654	eye development	25/967	47/1831	0.538944	0.999326	0.999326	NECTIN3/STAU2/SP3/WNT7B/PKNOX1/RAX/SOS1/BCL2/FOXL2/SPRED1/FGF10/THY1/TFAP2B/SHROOM2/CABP4/MITF/DZANK1/FGF9/ALDH1A3/NHS/TMEM215/FAT3/MDM1/NECTIN1/ATP2B4	25
GO:0150063	visual system development	25/967	47/1831	0.538944	0.999326	0.999326	NECTIN3/STAU2/SP3/WNT7B/PKNOX1/RAX/SOS1/BCL2/FOXL2/SPRED1/FGF10/THY1/TFAP2B/SHROOM2/CABP4/MITF/DZANK1/FGF9/ALDH1A3/NHS/TMEM215/FAT3/MDM1/NECTIN1/ATP2B4	25
GO:1901987	regulation of cell cycle phase transition	25/967	47/1831	0.538944	0.999326	0.999326	ATRIP/KLHL18/RAD50/TP53BP1/SPDL1/RPTOR/NPM1/INTS7/BCL2/ARID1B/TOPBP1/FGF10/FEM1B/CUL4B/PINX1/NEK10/USP44/RBL1/TMEM14B/WDR76/STXBP4/SIN3A/ANAPC4/MECP2/ATP2B4	25
GO:0071310	cellular response to organic substance	106/967	201/1831	0.539396	0.999326	0.999326	INSIG1/SRA1/IFNAR2/SORBS1/RAD23B/HRH1/GLDC/ERLEC1/FAM210B/WNT7B/GAB1/ABCA7/RPTOR/TNFRSF13C/METTL3/NPM1/ZNF236/SLC9B2/MAP2K6/TLR4/EEF1E1/YOD1/EPS8/CPT1A/SOS1/UGGT1/BCL2/SYK/ARID1B/SH3BP4/DNAJB14/TIAM1/TOLLIP/ACTN2/XCR1/KDM4C/WDR35/PTPN1/THRA/STAT1/IRAK4/PTPRE/ADAM23/AQP9/EIF2AK2/UBE3A/ACE/ADRA2A/DNAJB12/HEYL/NFYB/UFSP2/UGGT2/EPHA5/EFHC2/IFNGR1/SLC1A2/RIPOR2/SOD2/ERBIN/CAPN10/MAVS/PRKD1/TOP2B/ASAH1…	106
GO:0034330	cell junction organization	46/967	87/1831	0.539884	0.999326	0.999326	BDNF/CAPRIN1/SORBS1/STAU2/WNT7B/ARHGAP6/PTPRK/SLC6A1/TBCD/GJC1/BCL2/MPP7/TIAM1/GLRB/ACTN2/ZDHHC2/THY1/GABRA2/WDR1/ACE/WHRN/TMEM108/FMN1/ST8SIA2/MPDZ/FZD1/TANC2/EPB41L3/ITGA3/WHAMM/HDAC6/ADGRB3/PPFIA2/PKP4/MESD/CAST/CAMK2B/STRN/SRGAP2/MECP2/MUSK/NECTIN1/APLNR/PTPRA/IKBKB/SPG11	46
GO:0043412	macromolecule modification	204/967	387/1831	0.540654	0.999326	0.999326	WWTR1/TTBK2/EEF2KMT/YRDC/KLHL18/SIRT3/USP35/BDNF/FMR1/HTT/VIPAS39/CAMTA1/TBC1D24/RNF2/RAD50/WWP2/ZNF451/ERRFI1/APOBEC3D/NAA30/HGF/UBE2Z/DYRK2/ABCA7/ETFBKMT/RPTOR/APOBEC3F/RAP2C/RICTOR/METTL3/KMT2A/PTPRK/GNA12/NPM1/USP12/STK16/MGAT2/MAP2K6/TLR4/YOD1/BRAF/UGGT1/BCL2/SYK/ING5/ADARB1/ST3GAL3/IP6K2/TOLLIP/VKORC1L1/SPRED1/KDM6B/KBTBD7/SETDB2/CAND1/LIPT2/PTPN1/MAST4/FGF10/ZDHHC2/GRK3/HECTD4/THY1/ZDHHC11…	204
GO:0036211	protein modification process	195/967	370/1831	0.54235	0.999326	0.999326	WWTR1/TTBK2/EEF2KMT/KLHL18/SIRT3/USP35/BDNF/FMR1/HTT/VIPAS39/CAMTA1/TBC1D24/RNF2/RAD50/WWP2/ZNF451/ERRFI1/NAA30/HGF/UBE2Z/DYRK2/ABCA7/ETFBKMT/RPTOR/RAP2C/RICTOR/KMT2A/PTPRK/GNA12/NPM1/USP12/STK16/MGAT2/MAP2K6/TLR4/YOD1/BRAF/UGGT1/BCL2/SYK/ING5/ADARB1/ST3GAL3/IP6K2/TOLLIP/VKORC1L1/SPRED1/KDM6B/KBTBD7/SETDB2/CAND1/LIPT2/PTPN1/MAST4/FGF10/ZDHHC2/GRK3/HECTD4/THY1/ZDHHC11/PTPRE/FEM1B/CUL4B/PINX1/KALRN…	195
GO:0048646	anatomical structure formation involved in morphogenesis	67/967	127/1831	0.542538	0.999326	0.999326	CCBE1/SHB/SP3/TTC21B/GAB1/PKNOX1/SEMA5A/VASH1/SYK/ACTN2/SPRED1/CCDC136/HEY2/KDM6B/KDM4C/NECTIN2/FGF10/STAT1/THY1/FIG4/WDR1/ACE/KIF16B/AGO1/WHRN/FMNL3/HEYL/EPN2/SLC24A4/RIPOR2/POFUT1/TFAP2B/FOXB1/PRKD1/FMN1/APAF1/RAPGEF3/SIRT1/TIFAB/FZD1/PTPN18/EPB41L3/STIM1/ITGA3/HMGA2/ADGRB3/ZFPM1/HS2ST1/LMOD1/HTATIP2/ITGB2/FGF9/ALDH1A3/POGLUT1/TMEM215/SULF1/STARD13/C1GALT1/ANGPT1/ANKRD23/FAT3/MECP2/RPL7L1/NECTI…	67
GO:0051254	positive regulation of RNA metabolic process	117/967	222/1831	0.542883	0.999326	0.999326	WWTR1/SRA1/IRF4/CAMTA1/PTOV1/CAPRIN1/WWP2/TCF4/SP3/SLC38A3/HGF/TP53BP1/PKNOX1/RPTOR/RAP2C/METTL3/RAX/E2F5/KMT2A/NPM1/WDR43/YTHDF1/GMEB2/STK16/TLR4/ZNF493/UBTF/HOXD3/FOXL2/ARID1B/ZNF516/ZNF208/ACTN2/GRSF1/HEY2/KDM6B/KDM4C/CAND1/WWOX/ELK4/FGF10/THRA/STAT1/WWC1/ZNF496/ETV5/ETV6/ZNF268/WDR77/ZNF300/HOXA4/UBE3A/ASXL1/TRIM52/AGO1/THRAP3/FHL5/HEYL/ZEB2/NFYB/ZNF507/TFCP2L1/RFX3/ING1/FBXW11/ZNF197/TFAP2B/…	117
GO:0051172	negative regulation of nitrogen compound metabolic process	137/967	260/1831	0.543754	0.999326	0.999326	WWTR1/FMR1/MXD4/VIP/ZNF19/SERPINB8/CAPRIN1/WTIP/TBC1D24/RNF2/RAD50/WWP2/ZNF451/ERRFI1/APOBEC3D/SP3/HGF/TP53BP1/ABCA7/APOBEC3F/LRPPRC/METTL3/PTPRK/NPM1/YTHDF1/YWHAQ/CBX6/FOXL2/L3MBTL4/ADARB1/BHLHE40/SHLD2/KHDRBS1/SPRED1/HEY2/SETDB2/JPH2/KLF8/ELK4/ZNF436/PTPN1/THRA/HOXB8/STAT1/THY1/MCPH1/WWC1/ETV5/PINX1/ETV6/ZNF268/PSME3IP1/SMCHD1/USP9X/EIF2AK2/THAP5/IPO7/ZNF566/AGO1/THRAP3/GPD1L/ZNF529/USP44/RIOX2…	137
GO:1901615	organic hydroxy compound metabolic process	26/967	49/1831	0.544626	0.999326	0.999326	INSIG1/HRH1/ACP3/NFE2L1/HMGCS1/BCL2/INPP4B/IP6K2/ADH6/TPH1/ADH1B/BCO1/ZEB2/ASAH1/SIRT1/SPTLC1/FMO5/ITGB2/SULT1A1/ALDH1A3/SLC45A2/DUOXA1/MECP2/LDHD/GFI1/ASAH2	26
GO:0016054	organic acid catabolic process	15/967	28/1831	0.544924	0.999326	0.999326	GLDC/ALDH4A1/ETFBKMT/CPT1A/FTCD/IDO1/ACAD10/ALDH5A1/IDO2/AIG1/GCDH/ARG2/LDHD/ATP2B4/MLYCD	15
GO:0032412	regulation of monoatomic ion transmembrane transporter activity	15/967	28/1831	0.544924	0.999326	0.999326	FMR1/HTT/WWP2/ATP1B2/ACTN2/JPH2/TCAF1/ADRA2A/GPD1L/WNK2/CABP4/STIM1/AKAP9/NETO1/STIMATE	15
GO:0046395	carboxylic acid catabolic process	15/967	28/1831	0.544924	0.999326	0.999326	GLDC/ALDH4A1/ETFBKMT/CPT1A/FTCD/IDO1/ACAD10/ALDH5A1/IDO2/AIG1/GCDH/ARG2/LDHD/ATP2B4/MLYCD	15
GO:0071214	cellular response to abiotic stimulus	15/967	28/1831	0.544924	0.999326	0.999326	SLC38A3/TP53BP1/RPTOR/METTL3/PTPRK/NPM1/TLR4/INTS7/CUL4B/SLC24A4/SIRT1/TIFAB/TANK/RRH/NET1	15
GO:0104004	cellular response to environmental stimulus	15/967	28/1831	0.544924	0.999326	0.999326	SLC38A3/TP53BP1/RPTOR/METTL3/PTPRK/NPM1/TLR4/INTS7/CUL4B/SLC24A4/SIRT1/TIFAB/TANK/RRH/NET1	15
GO:0051046	regulation of secretion	37/967	70/1831	0.546348	0.999326	0.999326	SIRT3/FMR1/VIP/ACSL3/SLC9B2/RAB33B/MAP2K6/TLR4/BRAF/CPT1A/SLC6A1/SYK/FOXL2/TIAM1/ADORA3/FGF10/ADRA2A/SYT6/STXBP5/RFX3/EPHA5/RAB11FIP3/CAPN10/TFAP2B/PRKD1/STXBP4/RAB11FIP1/TIFAB/TM7SF3/PPFIA2/HFE/ITGB2/DOC2B/ATP2A2/GNAZ/SYT11/DNM1L	37
GO:0098771	inorganic ion homeostasis	27/967	51/1831	0.550098	0.999326	0.999326	HTT/SLC24A1/NT5E/SLC9B2/ATP1B2/BCL2/TTC7A/XCR1/JPH2/THY1/ATP2C1/ATP4B/SLC24A4/SOD2/PRKD1/KCNA1/STIM1/CCR5/SLC10A7/HFE/MCOLN2/SLC11A1/ATP2A2/ANKRD9/ISCU/APLNR/ATP2B4	27
GO:0060429	epithelium development	59/967	112/1831	0.551131	0.999326	0.999326	WWTR1/ERRFI1/HGF/WNT7B/RPTOR/RAP2C/CPT1A/SOS1/BCL2/FOXL2/TIAM1/EXTL3/TOLLIP/GRSF1/SPRED1/HEY2/KDM6B/SETDB2/TMEM107/FGF10/THRA/STAT1/FEM1B/WDR77/WDR1/ASXL1/IPO7/WHRN/HEYL/TFCP2L1/RFX3/GORAB/POFUT1/TFAP2B/FOXB1/ASAH1/PSAPL1/FMN1/APAF1/RAPGEF3/JHY/FZD1/POU2F3/ARG2/SLC4A7/HS2ST1/ALDH1A3/PRICKLE2/POGLUT1/SULF1/STARD13/C1GALT1/CBFA2T2/FRZB/KAZN/APLNR/STAT5B/IKBKB/SMURF2	59
GO:0002460	adaptive immune response based on somatic recombination of immune receptors built from immunoglobulin superfamily domains	16/967	30/1831	0.551625	0.999326	0.999326	CTSC/IRF4/TP53BP1/TLR4/SHLD2/NECTIN2/IGHG3/C4B/STX7/MAP3K7/TNFSF18/STAT4/HFE/RC3H2/SLC11A1/MSH6	16
GO:0006402	mRNA catabolic process	16/967	30/1831	0.551625	0.999326	0.999326	FMR1/VIP/CAPRIN1/METTL3/NPM1/YTHDF1/AGO1/THRAP3/AGO4/PNPT1/RC3H2/TNRC6B/SLC11A1/NCBP1/NCBP2/FASTKD1	16
GO:0006874	intracellular calcium ion homeostasis	16/967	30/1831	0.551625	0.999326	0.999326	HTT/SLC24A1/BCL2/XCR1/JPH2/THY1/ATP2C1/SLC24A4/PRKD1/STIM1/CCR5/SLC10A7/MCOLN2/ATP2A2/APLNR/ATP2B4	16
GO:0045862	positive regulation of proteolysis	16/967	30/1831	0.551625	0.999326	0.999326	CTSC/FMR1/CCBE1/SYK/FOXL2/ADRA2A/USP50/USP13/SH3RF2/FBXW11/APAF1/SIRT1/SH3RF1/TANK/CARD8/IST1	16
GO:0044419	biological process involved in interspecies interaction between organisms	80/967	152/1831	0.55282	0.999326	0.999326	NECTIN3/FMR1/MX2/IRF4/G3BP2/IFNAR2/HK1/WWP2/APOBEC3D/EXOC7/APOBEC3F/METTL3/SEC14L1/MAP2K6/TLR4/BCL2/SYK/ADARB1/TOLLIP/SPIRE1/NECTIN2/IDO1/PTPN1/IGHG3/FGF10/ABCC9/STAT1/IRAK4/ZDHHC11/C4B/BECN1/SLC22A5/CD209/EIF2AK2/ACE/IPO7/TRIM52/SMPDL3B/FKBP5/USP50/ATP4B/USP44/EXOC2/IFNGR1/NCR3/SOD2/ERBIN/MAVS/PRKD1/STXBP4/FBXO3/THBD/MAP3K7/TIFAB/TANK/SIN3A/TMEM229B/POU2F3/ARG2/ANKHD1/PTGFR/HMGA2/CCR5/JCHAIN/MCO…	80
GO:0009100	glycoprotein metabolic process	28/967	53/1831	0.555376	0.999326	0.999326	ABCA7/MGAT2/UGGT1/BCL2/ST3GAL3/EXTL3/HGSNAT/B3GLCT/MAN2A2/UBE2J1/FUT2/UGGT2/GCNT1/POFUT1/POMT1/ST8SIA2/FUT5/CANT1/HS2ST1/GALNT7/B4GALT5/POGLUT1/SULF1/C1GALT1/DPY19L4/ARFGEF1/UST/FUT10	28
GO:0032386	regulation of intracellular transport	28/967	53/1831	0.555376	0.999326	0.999326	INSIG1/MFF/MX2/ERLEC1/TTC21B/YOD1/KHDRBS1/ACTN2/PTPN1/TCAF1/ZDHHC2/WWC1/UBE2J1/STX18/RAB11FIP3/CAPN10/MAVS/UHMK1/PRKD1/RAPGEF3/HUWE1/MIEF1/ZFAND1/ITGB2/ANGPT1/MECP2/NCBP2/PPM1A	28
GO:0046942	carboxylic acid transport	28/967	53/1831	0.555376	0.999326	0.999326	SLC38A3/ACSL3/SLC7A6/RBP5/MAP2K6/FABP5P3/CPT1A/SLC6A1/SYK/SLCO2A1/ABCC4/SLC16A7/AQP9/ACE/SFXN5/SLC19A1/SLC6A6/SLC1A2/SLCO3A1/SLC6A13/SFXN2/SLC10A7/SLC16A9/SLC25A13/SLC11A1/SLC25A32/RGS2/SFXN1	28
GO:0045892	negative regulation of DNA-templated transcription	81/967	154/1831	0.556255	0.999326	0.999326	WWTR1/MXD4/ZNF19/WTIP/RNF2/WWP2/ZNF451/SP3/PTPRK/YWHAQ/CBX6/FOXL2/L3MBTL4/BHLHE40/KHDRBS1/HEY2/SETDB2/JPH2/KLF8/ELK4/ZNF436/THRA/HOXB8/STAT1/MCPH1/WWC1/ETV5/ETV6/ZNF268/USP9X/THAP5/ZNF566/ZNF529/RIOX2/HEYL/ZEB2/RBL1/TFCP2L1/RFX3/MIER3/ING1/FBXW11/TFAP2B/MOSPD1/JARID2/E2F6/SIRT1/BEND6/FZD1/SIN3A/MDM4/TRERF1/LRRFIP1/HDAC6/HMGA2/ZFPM1/MITF/SNX6/ZNF136/FGF9/ZNF558/TAF3/KAT6B/ZFP37/SINHCAF/RBAK/ZNF10/…	81
GO:0009607	response to biotic stimulus	71/967	135/1831	0.557298	0.999326	0.999326	FMR1/MX2/IRF4/G3BP2/IFNAR2/HK1/APOBEC3D/APOBEC3F/METTL3/SEC14L1/MAP2K6/TLR4/BCL2/SYK/ADARB1/TOLLIP/SPIRE1/NECTIN2/IDO1/PTPN1/IGHG3/FGF10/ABCC9/STAT1/IRAK4/ZDHHC11/C4B/BECN1/SLC22A5/CD209/EIF2AK2/ACE/IPO7/TRIM52/SMPDL3B/FKBP5/USP50/ATP4B/USP44/IFNGR1/NCR3/SOD2/ERBIN/MAVS/PRKD1/STXBP4/FBXO3/THBD/APAF1/MAP3K7/TIFAB/TANK/SIN3A/TMEM229B/ARG2/ANKHD1/PTGFR/HMGA2/CCR5/JCHAIN/MCOLN2/CARD8/H2BC6/SLC11A1/TR…	71
GO:0051128	regulation of cellular component organization	152/967	289/1831	0.557919	0.999326	0.999326	TTBK2/MFF/LMAN2/BDNF/FMR1/HTT/MID1/G3BP2/CAPRIN1/TBC1D24/RAD50/RIN3/STAU2/HGF/SPDL1/ABCA7/RPTOR/ARHGAP6/SEMA5A/RICTOR/NPM1/FCHSD1/YTHDF1/RAB33B/BICD2/TLR4/ATP1B2/SPAST/EPS8/BRAF/TBCD/BCL2/SYK/ING5/MPP7/ARID1B/SMC4/SH3BP4/VAMP4/ARPIN/TIAM1/GPSM2/IP6K2/EXTL3/ACTN2/SPIRE1/SETDB2/CAND1/PTPN1/ALMS1/ZDHHC2/THRA/THY1/SNX18/MCPH1/C4B/PINX1/BECN1/EIF2AK2/WDR1/ACE/USP50/RHPN2/USP44/VPS41/NCS1/ARPC5L/ZEB2/S…	152
GO:0018108	peptidyl-tyrosine phosphorylation	17/967	32/1831	0.557945	0.999326	0.999326	ERRFI1/HGF/RAP2C/RICTOR/SYK/PTPN1/FGF10/ACE/ADRA2A/CBLB/TNFSF18/GPRC5A/ITGB2/SNX6/ANGPT1/CASS4/GPRC5B	17
GO:0018212	peptidyl-tyrosine modification	17/967	32/1831	0.557945	0.999326	0.999326	ERRFI1/HGF/RAP2C/RICTOR/SYK/PTPN1/FGF10/ACE/ADRA2A/CBLB/TNFSF18/GPRC5A/ITGB2/SNX6/ANGPT1/CASS4/GPRC5B	17
GO:0055074	calcium ion homeostasis	17/967	32/1831	0.557945	0.999326	0.999326	HTT/SLC24A1/NT5E/BCL2/XCR1/JPH2/THY1/ATP2C1/SLC24A4/PRKD1/STIM1/CCR5/SLC10A7/MCOLN2/ATP2A2/APLNR/ATP2B4	17
GO:0034097	response to cytokine	51/967	97/1831	0.561123	0.999326	0.999326	MX2/IFNAR2/RAD23B/GLDC/TNFRSF13C/METTL3/TLR4/EEF1E1/EPS8/SOS1/BCL2/SYK/TOLLIP/SELL/XCR1/WDR35/PTPN1/STAT1/IRAK4/ADAM23/SLC22A5/EIF2AK2/NFYB/EFHC2/IFNGR1/RIPOR2/ERBIN/MAVS/ASAH1/STXBP4/JARID2/MAP3K7/SIRT1/TANK/SIN3A/PNPT1/TNFSF18/ACKR2/CCR5/STAT4/CARD8/SLC11A1/LRRC70/ETV3/LIFR/ANGPT1/STAT5A/STAT5B/GFI1/IKBKB/ASAH2	51
GO:1902679	negative regulation of RNA biosynthetic process	83/967	158/1831	0.563001	0.999326	0.999326	WWTR1/MXD4/ZNF19/WTIP/RNF2/WWP2/ZNF451/APOBEC3D/SP3/APOBEC3F/PTPRK/YWHAQ/CBX6/FOXL2/L3MBTL4/BHLHE40/KHDRBS1/HEY2/SETDB2/JPH2/KLF8/ELK4/ZNF436/THRA/HOXB8/STAT1/MCPH1/WWC1/ETV5/ETV6/ZNF268/USP9X/THAP5/ZNF566/ZNF529/RIOX2/HEYL/ZEB2/RBL1/TFCP2L1/RFX3/MIER3/ING1/FBXW11/TFAP2B/MOSPD1/JARID2/E2F6/SIRT1/BEND6/FZD1/SIN3A/MDM4/TRERF1/LRRFIP1/HDAC6/HMGA2/ZFPM1/MITF/SNX6/ZNF136/FGF9/ZNF558/TAF3/KAT6B/ZFP37/S…	83
GO:0051239	regulation of multicellular organismal process	164/967	312/1831	0.563378	0.999326	0.999326	WWTR1/CTSC/BDNF/FMR1/IRF4/VIP/CAPRIN1/HK1/TBC1D24/CCBE1/ERRFI1/HRH1/STAU2/SHB/FAM210B/TTC21B/HGF/TP53BP1/GAB1/ABCA7/RPTOR/TNFRSF13C/SEMA5A/METTL3/ACP3/WDR43/SLC9B2/MAP2K6/TLR4/ATP1B2/UTP25/VASH1/BRAF/SOS1/GJC1/BCL2/SYK/ING5/FOXL2/ARID1B/ZNF516/TIAM1/ADORA3/BHLHE40/SHLD2/EXTL3/NBR1/SPRED1/HEY2/KDM6B/NECTIN2/IDO1/ALMS1/FGF10/THRA/ABCC9/HOXB8/STAT1/THY1/TPH1/BRD1/TNFRSF13B/WWC1/ETV5/BECN1/SLC22A5/CD…	164
GO:0051640	organelle localization	42/967	80/1831	0.568889	0.999326	0.999326	HTT/PSEN2/EXOC7/SPDL1/LRPPRC/TRAK2/NPM1/BICD2/SPAST/AP3B2/SYK/GPSM2/SPIRE1/NECTIN2/KIF3A/FGF10/MCPH1/PINX1/BICDL1/BECN1/STX7/EXOC2/FBXW11/SHROOM2/SIRT1/TANC2/PLEKHM1/HDAC6/PPFIA2/ESYT3/AP3M2/ATP2A2/SYT11/AKAP9/SYNE3/MECP2/MARK2/DNM1L/LIN7A/STX2/SPG11/TMEM201	42
GO:0007281	germ cell development	19/967	36/1831	0.569628	0.999326	0.999326	AFF4/RNF2/STAU2/SHB/METTL3/BCL2/FOXL2/CCDC136/NECTIN2/ETV5/WDR77/UBE2J1/MARF1/FBXW11/CATSPERE/ZDBF2/YTHDC1/DNHD1/AGFG1	19
GO:0050678	regulation of epithelial cell proliferation	19/967	36/1831	0.569628	0.999326	0.999326	VIP/RPTOR/SEMA5A/RICTOR/PTPRK/VASH1/FGF10/STAT1/WDR77/FUT2/WDR48/PRKD1/STXBP4/SIRT1/HDAC6/FGF9/SULF1/STAT5A/APLNR	19
GO:0051222	positive regulation of protein transport	19/967	36/1831	0.569628	0.999326	0.999326	MFF/SIRT3/ACSL3/TLR4/TCAF1/ZDHHC2/ATP2C1/CAPN10/MAVS/PRKD1/RAPGEF3/HUWE1/MIEF1/TM7SF3/ZFAND1/ITGB2/DOC2B/DNM1L/PPM1A	19
GO:0070085	glycosylation	19/967	36/1831	0.569628	0.999326	0.999326	MGAT2/UGGT1/ST3GAL3/B3GLCT/UBE2J1/FUT2/UGGT2/GCNT1/POFUT1/POMT1/ST8SIA2/FUT5/GALNT7/B4GALT5/POGLUT1/C1GALT1/DPY19L4/ARFGEF1/FUT10	19
GO:1904951	positive regulation of establishment of protein localization	19/967	36/1831	0.569628	0.999326	0.999326	MFF/SIRT3/ACSL3/TLR4/TCAF1/ZDHHC2/ATP2C1/CAPN10/MAVS/PRKD1/RAPGEF3/HUWE1/MIEF1/TM7SF3/ZFAND1/ITGB2/DOC2B/DNM1L/PPM1A	19
GO:0018193	peptidyl-amino acid modification	64/967	122/1831	0.569946	0.999326	0.999326	TTBK2/EEF2KMT/SIRT3/BDNF/VIPAS39/TBC1D24/ZNF451/ERRFI1/NAA30/HGF/DYRK2/ETFBKMT/RPTOR/RAP2C/RICTOR/KMT2A/BRAF/BCL2/SYK/IP6K2/TOLLIP/VKORC1L1/SPRED1/SETDB2/LIPT2/PTPN1/MAST4/FGF10/ZDHHC2/ZDHHC11/ACE/ADRA2A/FKBP5/GPD1L/NFYB/CBLB/METAP2/UHMK1/VRK3/PRKD1/MAP3K7/SIRT1/TNFSF18/GPRC5A/SUMO3/HDAC6/CAMK4/ITGB2/SNX6/GOLGA7B/PPARGC1A/POGLUT1/SET/CAMK2B/AKAP9/ANGPT1/MECP2/MARK2/DPY19L4/CASS4/ATP2B4/GPRC5B/MYO…	64
GO:0009891	positive regulation of biosynthetic process	157/967	299/1831	0.571149	0.999326	0.999326	WWTR1/SRA1/SIRT3/FMR1/IRF4/VIP/CAMTA1/PTOV1/HK1/CCBE1/SORBS1/WWP2/HRH1/SLC25A37/TCF4/SP3/SLC38A3/TTC21B/HGF/ACSL3/DYRK2/TP53BP1/PKNOX1/RPTOR/RAP2C/METTL3/RAX/E2F5/KMT2A/NPM1/WDR43/YTHDF1/GMEB2/STK16/MAP2K6/TLR4/ZNF493/UBTF/BRAF/HOXD3/SYK/FOXL2/ARID1B/ZNF516/SHLD2/ZNF208/KHDRBS1/ACTN2/HEY2/KDM6B/KDM4C/CAND1/WWOX/ELK4/IDO1/FGF10/THRA/STAT1/WWC1/ZNF496/ETV5/ETV6/ZNF268/EIF2AK2/WDR77/ZNF300/HOXA4/UBE…	157
GO:1902533	positive regulation of intracellular signal transduction	54/967	103/1831	0.572904	0.999326	0.999326	MID1/CAMTA1/HGF/WNT7B/ABCA7/RPTOR/SEMA5A/RICTOR/TMEM9B/MAP2K6/TLR4/EEF1E1/BRAF/SOS1/SYK/EXTL3/SPRED1/PTPN1/FGF10/IRAK4/WWC1/BECN1/USP9X/NEK10/EIF2AK2/ADRA2A/TRIM52/ATP2C1/NDFIP2/SH3RF2/FBXW11/MAVS/PRKD1/MAP3K7/SIRT1/SH3RF1/ZDHHC17/GPR65/CANT1/RC3H2/PRXL2C/TRIM13/USP4/ANGPT1/ABRA/SLC20A1/MUSK/DNM1L/CASS4/GPRC5B/STIMATE/NET1/PPM1A/IKBKB	54
GO:0034504	protein localization to nucleus	20/967	38/1831	0.575062	0.999326	0.999326	WWTR1/ABCA7/NPM1/UTP25/SYK/KCNQ3/PINX1/IPO7/CBLB/ING1/MAVS/PRKD1/SIN3A/SUMO3/FGF9/TAF3/TOR1AIP1/ANGPT1/ABRA/SPG11	20
GO:0043010	camera-type eye development	20/967	38/1831	0.575062	0.999326	0.999326	NECTIN3/SP3/WNT7B/PKNOX1/RAX/SOS1/FOXL2/SPRED1/FGF10/THY1/TFAP2B/SHROOM2/CABP4/MITF/ALDH1A3/NHS/FAT3/MDM1/NECTIN1/ATP2B4	20
GO:0051402	neuron apoptotic process	20/967	38/1831	0.575062	0.999326	0.999326	BDNF/BRAF/BCL2/ADARB1/KCNQ3/SOD2/TFAP2B/FOXB1/APAF1/ST8SIA2/SIRT1/FZD1/DNAJC5/SNX6/PPARGC1A/SET/ANGPT1/RETREG1/MECP2/SPG11	20
GO:0001570	vasculogenesis	6/967	11/1831	0.575945	0.999326	0.999326	WNT7B/GJC1/SPRED1/HEY2/TIPARP/APLNR	6
GO:0001736	establishment of planar polarity	6/967	11/1831	0.575945	0.999326	0.999326	TIAM1/WDR1/JHY/FZD1/PRICKLE2/SMURF2	6
GO:0001738	morphogenesis of a polarized epithelium	6/967	11/1831	0.575945	0.999326	0.999326	TIAM1/WDR1/JHY/FZD1/PRICKLE2/SMURF2	6
GO:0002444	myeloid leukocyte mediated immunity	6/967	11/1831	0.575945	0.999326	0.999326	SYK/IRAK4/WDR1/ACE/MAVS/ITGB2	6
GO:0002761	regulation of myeloid leukocyte differentiation	6/967	11/1831	0.575945	0.999326	0.999326	RPTOR/SLC9B2/TLR4/ZFPM1/MITF/CAMK4	6
GO:0002793	positive regulation of peptide secretion	6/967	11/1831	0.575945	0.999326	0.999326	SIRT3/CAPN10/PRKD1/TM7SF3/HFE/DOC2B	6
GO:0003014	renal system process	6/967	11/1831	0.575945	0.999326	0.999326	BCL2/RHPN2/SLC5A2/ITGA3/JCHAIN/SULF1	6
GO:0006303	double-strand break repair via nonhomologous end joining	6/967	11/1831	0.575945	0.999326	0.999326	TP53BP1/SHLD2/SMCHD1/TOP2B/HMGA2/NHEJ1	6
GO:0007164	establishment of tissue polarity	6/967	11/1831	0.575945	0.999326	0.999326	TIAM1/WDR1/JHY/FZD1/PRICKLE2/SMURF2	6
GO:0007204	positive regulation of cytosolic calcium ion concentration	6/967	11/1831	0.575945	0.999326	0.999326	BCL2/XCR1/JPH2/PTGFR/ACKR2/CCR5	6
GO:0008033	tRNA processing	6/967	11/1831	0.575945	0.999326	0.999326	YRDC/GRSF1/FTSJ1/ADAT2/PNPT1/PUS10	6
GO:0009581	detection of external stimulus	6/967	11/1831	0.575945	0.999326	0.999326	WHRN/SLC24A4/KCNA1/CABP4/RRH/DRGX	6
GO:0009582	detection of abiotic stimulus	6/967	11/1831	0.575945	0.999326	0.999326	WHRN/SLC24A4/KCNA1/CABP4/RRH/DRGX	6
GO:0016064	immunoglobulin mediated immune response	6/967	11/1831	0.575945	0.999326	0.999326	TP53BP1/SHLD2/NECTIN2/IGHG3/C4B/MSH6	6
GO:0019217	regulation of fatty acid metabolic process	6/967	11/1831	0.575945	0.999326	0.999326	INSIG1/ETFBKMT/CPT1A/SIRT1/PPARGC1A/MLYCD	6
GO:0019724	B cell mediated immunity	6/967	11/1831	0.575945	0.999326	0.999326	TP53BP1/SHLD2/NECTIN2/IGHG3/C4B/MSH6	6
GO:0021510	spinal cord development	6/967	11/1831	0.575945	0.999326	0.999326	ADARB1/HOXB8/RFX8/FOXB1/DRGX/MECP2	6
GO:0030850	prostate gland development	6/967	11/1831	0.575945	0.999326	0.999326	FGF10/FEM1B/WDR77/UBE3A/PSAPL1/SULF1	6
GO:0032479	regulation of type I interferon production	6/967	11/1831	0.575945	0.999326	0.999326	TLR4/SYK/STAT1/MAVS/TANK/ARRDC4	6
GO:0032606	type I interferon production	6/967	11/1831	0.575945	0.999326	0.999326	TLR4/SYK/STAT1/MAVS/TANK/ARRDC4	6
GO:0032874	positive regulation of stress-activated MAPK cascade	6/967	11/1831	0.575945	0.999326	0.999326	MID1/WNT7B/TLR4/EIF2AK2/SH3RF2/SH3RF1	6
GO:0043200	response to amino acid	6/967	11/1831	0.575945	0.999326	0.999326	RPTOR/BCL2/SH3BP4/SLC1A2/MEAK7/UBR1	6
GO:0051961	negative regulation of nervous system development	6/967	11/1831	0.575945	0.999326	0.999326	SEMA5A/THY1/CDKL3/HDAC6/FSTL4/MECP2	6
GO:0060079	excitatory postsynaptic potential	6/967	11/1831	0.575945	0.999326	0.999326	TBC1D24/GLRB/TMEM108/IGSF11/MECP2/NETO1	6
GO:0070373	negative regulation of ERK1 and ERK2 cascade	6/967	11/1831	0.575945	0.999326	0.999326	SIRT3/TLR4/SPRED1/PTPN1/WNK2/VRK3	6
GO:0071103	DNA conformation change	6/967	11/1831	0.575945	0.999326	0.999326	RAD50/TOP3A/MCMDC2/TOP3B/TOP2B/SETX	6
GO:0090277	positive regulation of peptide hormone secretion	6/967	11/1831	0.575945	0.999326	0.999326	SIRT3/CAPN10/PRKD1/TM7SF3/HFE/DOC2B	6
GO:0099565	chemical synaptic transmission, postsynaptic	6/967	11/1831	0.575945	0.999326	0.999326	TBC1D24/GLRB/TMEM108/IGSF11/MECP2/NETO1	6
GO:0120034	positive regulation of plasma membrane bounded cell projection assembly	6/967	11/1831	0.575945	0.999326	0.999326	FMR1/HTT/EPS8/RIPOR2/PLEKHM1/MYO3B	6
GO:1901606	alpha-amino acid catabolic process	6/967	11/1831	0.575945	0.999326	0.999326	GLDC/ALDH4A1/IDO1/IDO2/ARG2/ATP2B4	6
GO:1901655	cellular response to ketone	6/967	11/1831	0.575945	0.999326	0.999326	ACE/PRKD1/SIRT1/TRERF1/PTGFR/FBXO32	6
GO:1904035	regulation of epithelial cell apoptotic process	6/967	11/1831	0.575945	0.999326	0.999326	SEMA5A/BRAF/BCL2/CAPN10/CAST/ANGPT1	6
GO:1904063	negative regulation of cation transmembrane transport	6/967	11/1831	0.575945	0.999326	0.999326	FMR1/BCL2/ACTN2/ADRA2A/ISCU/UBR3	6
GO:0031344	regulation of cell projection organization	44/967	84/1831	0.577184	0.999326	0.999326	BDNF/FMR1/HTT/CAPRIN1/TBC1D24/STAU2/SEMA5A/YTHDF1/ATP1B2/EPS8/BRAF/ARPIN/TIAM1/THY1/NCS1/PLD1/EFHC2/RAB11FIP3/RIPOR2/PRKD1/MYO10/FZD1/SETX/TANC2/CDKL3/PLEKHM1/ITGA3/HDAC6/ADGRB3/PPFIA2/SF3A2/FSTL4/CAMK2B/CBFA2T2/FAT3/RGS2/MARK2/MUSK/ZFYVE27/IST1/GFI1/UST/MYO3B/SS18L1	44
GO:0071345	cellular response to cytokine stimulus	44/967	84/1831	0.577184	0.999326	0.999326	IFNAR2/RAD23B/GLDC/TNFRSF13C/METTL3/TLR4/EEF1E1/EPS8/SOS1/SYK/TOLLIP/XCR1/WDR35/PTPN1/STAT1/IRAK4/ADAM23/NFYB/EFHC2/IFNGR1/RIPOR2/ERBIN/MAVS/ASAH1/STXBP4/JARID2/MAP3K7/SIRT1/TANK/SIN3A/PNPT1/TNFSF18/ACKR2/CCR5/STAT4/CARD8/ETV3/LIFR/ANGPT1/STAT5A/STAT5B/GFI1/IKBKB/ASAH2	44
GO:0050865	regulation of cell activation	33/967	63/1831	0.579338	0.999326	0.999326	CTSC/IRF4/SHB/TP53BP1/TNFRSF13C/METTL3/TLR4/BRAF/SOS1/BCL2/SYK/ARID1B/SHLD2/NECTIN2/IDO1/FGF10/THY1/TNFRSF13B/CD209/CBLB/RIPOR2/THBD/SH3RF1/TNFSF18/TNFRSF9/ARG2/MMRN1/HFE/CAMK4/ITGB2/RC3H2/SYT11/STAT5B	33
GO:0055080	monoatomic cation homeostasis	33/967	63/1831	0.579338	0.999326	0.999326	HTT/SLC24A1/NT5E/SLC9A7/TESMIN/SLC9B2/ATP1B2/BCL2/TTC7A/XCR1/JPH2/ATP6V1B2/THY1/UBE3A/ATP2C1/ATP4B/SLC24A4/SOD2/PRKD1/KCNA1/STIM1/CCR5/SLC10A7/SLC4A7/HFE/MCOLN2/SLC11A1/ATP2A2/SLC45A2/ANKRD9/ISCU/APLNR/ATP2B4	33
GO:1903530	regulation of secretion by cell	33/967	63/1831	0.579338	0.999326	0.999326	SIRT3/FMR1/VIP/SLC9B2/RAB33B/MAP2K6/TLR4/BRAF/CPT1A/SYK/FOXL2/TIAM1/ADORA3/ADRA2A/SYT6/STXBP5/RFX3/EPHA5/RAB11FIP3/CAPN10/TFAP2B/PRKD1/STXBP4/RAB11FIP1/TM7SF3/PPFIA2/HFE/ITGB2/DOC2B/ATP2A2/GNAZ/SYT11/DNM1L	33
GO:0006813	potassium ion transport	21/967	40/1831	0.580263	0.999326	0.999326	VIP/SLC24A1/WWP2/SLC9A7/KCNAB2/ATP1B2/KCNQ3/ACTN2/ABCC9/ADRA2A/ATP4B/SLC24A4/KCNA1/KCNJ13/KCNQ5/KCNN3/KCNT2/AKAP9/NETO1/KCNC4/KCNJ5	21
GO:0030099	myeloid cell differentiation	21/967	40/1831	0.580263	0.999326	0.999326	IRF4/SP3/FAM210B/PKNOX1/RPTOR/SLC9B2/TLR4/THRA/HOXB8/STAT1/BRD1/WDR1/SIRT1/TIFAB/ZFPM1/MITF/CAMK4/SLC25A40/STAT5A/SFXN1/STAT5B	21
GO:0034470	ncRNA processing	21/967	40/1831	0.580263	0.999326	0.999326	MRPL44/YRDC/METTL3/WDR43/UTP25/INTS7/GRSF1/ERI1/FTSJ1/ADAT2/AGO1/INTS2/AGO4/PNPT1/SHQ1/NCBP1/MECP2/RPL7L1/NCBP2/ZCCHC8/PUS10	21
GO:0000956	nuclear-transcribed mRNA catabolic process	7/967	13/1831	0.582232	0.999326	0.999326	CAPRIN1/AGO1/THRAP3/RC3H2/TNRC6B/NCBP1/NCBP2	7
GO:0001655	urogenital system development	7/967	13/1831	0.582232	0.999326	0.999326	FGF10/FEM1B/WDR77/UBE3A/FOXB1/PSAPL1/SULF1	7
GO:0002824	positive regulation of adaptive immune response based on somatic recombination of immune receptors built from immunoglobulin superfamily domains	7/967	13/1831	0.582232	0.999326	0.999326	TP53BP1/SHLD2/NECTIN2/STX7/MAP3K7/HFE/SLC11A1	7
GO:0006986	response to unfolded protein	7/967	13/1831	0.582232	0.999326	0.999326	ERLEC1/ABCA7/YOD1/PTPN1/EIF2AK2/DNAJC10/TM7SF3	7
GO:0007368	determination of left/right symmetry	7/967	13/1831	0.582232	0.999326	0.999326	SETDB2/TMEM107/FGF10/RFX3/PSKH1/DNAAF11/APLNR	7
GO:0009199	ribonucleoside triphosphate metabolic process	7/967	13/1831	0.582232	0.999326	0.999326	NT5E/ATP6V1B2/ENTPD4/AK4/SLC25A13/PPARGC1A/DNM1L	7
GO:0009791	post-embryonic development	7/967	13/1831	0.582232	0.999326	0.999326	KMT2A/BCL2/ALDH5A1/SOD2/RC3H2/TIPARP/MECP2	7
GO:0009799	specification of symmetry	7/967	13/1831	0.582232	0.999326	0.999326	SETDB2/TMEM107/FGF10/RFX3/PSKH1/DNAAF11/APLNR	7
GO:0009855	determination of bilateral symmetry	7/967	13/1831	0.582232	0.999326	0.999326	SETDB2/TMEM107/FGF10/RFX3/PSKH1/DNAAF11/APLNR	7
GO:0010565	regulation of cellular ketone metabolic process	7/967	13/1831	0.582232	0.999326	0.999326	INSIG1/ETFBKMT/CPT1A/SIRT1/PPARGC1A/ATP2B4/MLYCD	7
GO:0030879	mammary gland development	7/967	13/1831	0.582232	0.999326	0.999326	WNT7B/FGF10/TPH1/FOXB1/SOCS2/STAT5A/STAT5B	7
GO:0031398	positive regulation of protein ubiquitination	7/967	13/1831	0.582232	0.999326	0.999326	NPM1/UBE3A/CBLB/NDFIP2/HUWE1/ANGPT1/ARRDC4	7
GO:0043502	regulation of muscle adaptation	7/967	13/1831	0.582232	0.999326	0.999326	BECN1/JARID2/ATP2A2/CAMK2B/FBXO32/RGS2/ATP2B4	7
GO:0045913	positive regulation of carbohydrate metabolic process	7/967	13/1831	0.582232	0.999326	0.999326	SORBS1/HRH1/DYRK2/RPTOR/SIRT1/PRXL2C/PPARGC1A	7
GO:0046513	ceramide biosynthetic process	7/967	13/1831	0.582232	0.999326	0.999326	SIRT3/ST3GAL3/ASAH1/ST8SIA2/SPTLC1/B4GALT5/ASAH2	7
GO:0060972	left/right pattern formation	7/967	13/1831	0.582232	0.999326	0.999326	SETDB2/TMEM107/FGF10/RFX3/PSKH1/DNAAF11/APLNR	7
GO:0070828	heterochromatin organization	7/967	13/1831	0.582232	0.999326	0.999326	SETDB2/SMCHD1/JARID2/SIRT1/SIN3A/HMGA2/MECP2	7
GO:1902414	protein localization to cell junction	7/967	13/1831	0.582232	0.999326	0.999326	NECTIN3/STAU2/MPP7/KIF3A/ZDHHC2/NETO1/NECTIN1	7
GO:1903034	regulation of response to wounding	7/967	13/1831	0.582232	0.999326	0.999326	BRAF/EXTL3/ADRA2A/THBD/ENPP4/MMRN1/ARFGEF1	7
GO:1903038	negative regulation of leukocyte cell-cell adhesion	7/967	13/1831	0.582232	0.999326	0.999326	IDO1/CBLB/RIPOR2/TNFSF18/ARG2/HFE/RC3H2	7
GO:1990266	neutrophil migration	7/967	13/1831	0.582232	0.999326	0.999326	SYK/IRAK4/WDR1/RIPOR2/ITGB2/MCOLN2/DNM1L	7
GO:0040008	regulation of growth	34/967	65/1831	0.583719	0.999326	0.999326	BDNF/RPTOR/SEMA5A/RICTOR/NPM1/BCL2/ING5/SH3BP4/IP6K2/EXTL3/HEY2/WWC1/TFCP2L1/ING1/JARID2/LRP12/SIN3A/PNPT1/CDKL3/HDAC6/FGF9/FSTL4/SOCS2/NCBP1/RBBP7/MECP2/STAT5A/RGS2/FRZB/MUSK/ZFYVE27/IST1/STAT5B/NET1	34
GO:0050801	monoatomic ion homeostasis	34/967	65/1831	0.583719	0.999326	0.999326	HTT/SLC24A1/NT5E/SLC9A7/TESMIN/SLC9B2/ATP1B2/BCL2/TTC7A/XCR1/JPH2/ATP6V1B2/THY1/UBE3A/ATP2C1/ATP4B/SLC24A4/WNK2/SOD2/PRKD1/KCNA1/STIM1/CCR5/SLC10A7/SLC4A7/HFE/MCOLN2/SLC11A1/ATP2A2/SLC45A2/ANKRD9/ISCU/APLNR/ATP2B4	34
GO:0006887	exocytosis	22/967	42/1831	0.585253	0.999326	0.999326	FMR1/EXOC7/TMEM167A/RAB33B/BRAF/SYK/ABCC4/TPH1/ADRA2A/SYT6/STXBP5/EXOC2/RAB11FIP1/DNAJC5/PPFIA2/ITGB2/DOC2B/ATP2A2/SYT11/ARFGEF1/LIN7A/STX2	22
GO:0044772	mitotic cell cycle phase transition	22/967	42/1831	0.585253	0.999326	0.999326	KLHL18/RAD50/SPDL1/RPTOR/SPAST/EPS8/BCL2/ARID1B/TOPBP1/KHDRBS1/FGF10/CUL4B/PINX1/USP44/RBL1/TMEM14B/E2F6/SIN3A/CACUL1/ANAPC4/MECP2/GFI1	22
GO:1901135	carbohydrate derivative metabolic process	58/967	111/1831	0.587657	0.999326	0.999326	NT5E/HK1/APOBEC3D/ACSL3/ABCA7/RPTOR/APOBEC3F/ACP3/MGAT2/HMGCS1/UGGT1/BCL2/ST3GAL3/EXTL3/ATP6V1B2/HGSNAT/SLC25A16/B3GLCT/DPYD/MAN2A2/UBE2J1/GPD1L/DHFR2/FUT2/UGGT2/ENTPD4/GCNT1/POFUT1/POMT1/PTHLH/ST8SIA2/FUT5/GCDH/ENPP4/CANT1/AK4/SLC10A7/HS2ST1/SULT1A1/GALNT7/SLC35A3/PRPS1/B4GALT5/SLC25A13/PPARGC1A/POGLUT1/SULF1/C1GALT1/ANGPT1/AOAH/DPY19L4/DNM1L/GLYCTK/ARFGEF1/MLYCD/ELOVL7/UST/FUT10	58
GO:0001539	cilium or flagellum-dependent cell motility	8/967	15/1831	0.58806	0.999326	0.999326	SLC9B2/RFX3/CATSPERE/CCDC65/DNHD1/DNAAF11/ATP2B4/DNAH9	8
GO:0002706	regulation of lymphocyte mediated immunity	8/967	15/1831	0.58806	0.999326	0.999326	TP53BP1/SHLD2/NECTIN2/STX7/NCR3/MAP3K7/HFE/STAT5B	8
GO:0002821	positive regulation of adaptive immune response	8/967	15/1831	0.58806	0.999326	0.999326	TP53BP1/SHLD2/NECTIN2/STX7/MAP3K7/SIRT1/HFE/SLC11A1	8
GO:0009063	amino acid catabolic process	8/967	15/1831	0.58806	0.999326	0.999326	GLDC/ALDH4A1/FTCD/IDO1/ALDH5A1/IDO2/ARG2/ATP2B4	8
GO:0015804	neutral amino acid transport	8/967	15/1831	0.58806	0.999326	0.999326	SLC38A3/SLC7A6/SLC6A6/SLC1A2/SFXN2/SLC25A13/RGS2/SFXN1	8
GO:0019882	antigen processing and presentation	8/967	15/1831	0.58806	0.999326	0.999326	YTHDF1/CD209/ACE/HFE/SLC11A1/RAB4A/IDE/IKBKB	8
GO:0021987	cerebral cortex development	8/967	15/1831	0.58806	0.999326	0.999326	MCPH1/TMEM14B/KCNA1/DIXDC1/FAT4/SRGAP2/MECP2/FUT10	8
GO:0042471	ear morphogenesis	8/967	15/1831	0.58806	0.999326	0.999326	INSIG1/FGF10/WHRN/TIFAB/FGF9/ALDH1A3/FRZB/MYO3B	8
GO:0042752	regulation of circadian rhythm	8/967	15/1831	0.58806	0.999326	0.999326	BHLHE40/USP9X/UBE3A/THRAP3/MAPK10/FBXW11/SIN3A/PPARGC1A	8
GO:0043500	muscle adaptation	8/967	15/1831	0.58806	0.999326	0.999326	HEY2/BECN1/JARID2/ATP2A2/CAMK2B/FBXO32/RGS2/ATP2B4	8
GO:0060285	cilium-dependent cell motility	8/967	15/1831	0.58806	0.999326	0.999326	SLC9B2/RFX3/CATSPERE/CCDC65/DNHD1/DNAAF11/ATP2B4/DNAH9	8
GO:0061326	renal tubule development	8/967	15/1831	0.58806	0.999326	0.999326	WWTR1/WNT7B/BCL2/STAT1/HEYL/TFAP2B/FMN1/HS2ST1	8
GO:0072080	nephron tubule development	8/967	15/1831	0.58806	0.999326	0.999326	WWTR1/WNT7B/BCL2/STAT1/HEYL/TFAP2B/FMN1/HS2ST1	8
GO:0072089	stem cell proliferation	8/967	15/1831	0.58806	0.999326	0.999326	SHB/WNT7B/FGF10/ETV6/EIF2AK2/ACE/HMGA2/FGF9	8
GO:0140013	meiotic nuclear division	8/967	15/1831	0.58806	0.999326	0.999326	RAD50/TESMIN/SMC4/SPIRE1/MARF1/TOP2B/AGO4/HSF2BP	8
GO:2000781	positive regulation of double-strand break repair	8/967	15/1831	0.58806	0.999326	0.999326	ARID1B/SHLD2/SPIRE1/SMCHD1/WDR48/TOP2B/TRRAP/SIRT1	8
GO:2001242	regulation of intrinsic apoptotic signaling pathway	8/967	15/1831	0.58806	0.999326	0.999326	BCL2/PTPN1/BECN1/SOD2/SIRT1/TIFAB/FZD1/DNM1L	8
GO:0048468	cell development	164/967	313/1831	0.589002	0.999326	0.999326	AGPAT5/BDNF/FMR1/IRF4/CAPRIN1/AFF4/TBC1D24/RNF2/STAU2/SHB/SP3/FAM210B/WNT7B/PKNOX1/RPTOR/RAP2C/SEMA5A/METTL3/KMT2A/YTHDF1/SLC9B2/TLR4/ATP1B2/SPAST/BRAF/SOS1/TBCD/GJC1/ENAH/BCL2/SYK/ING5/FOXL2/ARID1B/ADARB1/TTC7A/SLC7A6OS/TIAM1/BHLHE40/KCNQ3/ACTN2/CCDC136/HEY2/NECTIN2/IRX5/THRA/HOXB8/STAT1/THY1/BRD1/TNFRSF13B/FEM1B/CUL4B/ETV5/KALRN/BICDL1/BECN1/ETV6/USP9X/EIF2AK2/WDR77/FIG4/WDR1/ACE/ASXL1/UBE2J1/W…	164
GO:0022613	ribonucleoprotein complex biogenesis	23/967	44/1831	0.590053	0.999326	0.999326	MRPL44/NPM1/WDR43/UTP25/LTO1/TMA16/ERI1/CUL4B/WDR77/AGO1/RIOX2/GRWD1/MTG2/SETX/AGO4/SF3A1/SHQ1/SF3A2/YTHDC1/URB2/NCBP1/USP4/RPL7L1	23
GO:0015837	amine transport	9/967	17/1831	0.593516	0.999326	0.999326	VIP/SLC38A3/SLC6A1/ADORA3/AQP9/ADRA2A/SYT6/SYT11/RGS2	9
GO:0016441	post-transcriptional gene silencing	9/967	17/1831	0.593516	0.999326	0.999326	FMR1/WTIP/MIR29B2CHG/AGO1/AGO4/TNRC6B/NCBP1/MECP2/NCBP2	9
GO:0021675	nerve development	9/967	17/1831	0.593516	0.999326	0.999326	BDNF/HOXD3/ADARB1/KCNQ3/SLC24A4/KCNA1/TIFAB/DRGX/SULF1	9
GO:0030148	sphingolipid biosynthetic process	9/967	17/1831	0.593516	0.999326	0.999326	SIRT3/ST3GAL3/PRKD1/ASAH1/ST8SIA2/SPTLC1/B4GALT5/ELOVL7/ASAH2	9
GO:0035194	regulatory ncRNA-mediated post-transcriptional gene silencing	9/967	17/1831	0.593516	0.999326	0.999326	FMR1/WTIP/MIR29B2CHG/AGO1/AGO4/TNRC6B/NCBP1/MECP2/NCBP2	9
GO:0046467	membrane lipid biosynthetic process	9/967	17/1831	0.593516	0.999326	0.999326	SIRT3/ST3GAL3/PRKD1/ASAH1/ST8SIA2/SPTLC1/B4GALT5/ELOVL7/ASAH2	9
GO:0046890	regulation of lipid biosynthetic process	9/967	17/1831	0.593516	0.999326	0.999326	INSIG1/SIRT3/SORBS1/ACSL3/RPTOR/ASAH1/SIRT1/HULC/GFI1	9
GO:0062013	positive regulation of small molecule metabolic process	9/967	17/1831	0.593516	0.999326	0.999326	SORBS1/HRH1/DYRK2/RPTOR/CPT1A/SIRT1/PRXL2C/PPARGC1A/MLYCD	9
GO:0072009	nephron epithelium development	9/967	17/1831	0.593516	0.999326	0.999326	WWTR1/WNT7B/BCL2/STAT1/ASXL1/HEYL/TFAP2B/FMN1/HS2ST1	9
GO:1902806	regulation of cell cycle G1/S phase transition	9/967	17/1831	0.593516	0.999326	0.999326	RPTOR/BCL2/ARID1B/FGF10/CUL4B/RBL1/TMEM14B/STXBP4/ATP2B4	9
GO:0031328	positive regulation of cellular biosynthetic process	156/967	298/1831	0.594585	0.999326	0.999326	WWTR1/SRA1/SIRT3/FMR1/IRF4/VIP/CAMTA1/PTOV1/HK1/CCBE1/SORBS1/WWP2/HRH1/SLC25A37/TCF4/SP3/SLC38A3/TTC21B/HGF/ACSL3/DYRK2/TP53BP1/PKNOX1/RPTOR/RAP2C/METTL3/RAX/E2F5/KMT2A/NPM1/WDR43/YTHDF1/GMEB2/STK16/MAP2K6/TLR4/ZNF493/UBTF/BRAF/HOXD3/SYK/FOXL2/ARID1B/ZNF516/SHLD2/ZNF208/KHDRBS1/ACTN2/HEY2/KDM6B/KDM4C/CAND1/WWOX/ELK4/IDO1/FGF10/THRA/STAT1/WWC1/ZNF496/ETV5/ETV6/ZNF268/EIF2AK2/WDR77/ZNF300/HOXA4/UBE…	156
GO:0010720	positive regulation of cell development	24/967	46/1831	0.59468	0.999326	0.999326	BDNF/CAPRIN1/TBC1D24/STAU2/SHB/RPTOR/SEMA5A/SLC9B2/BRAF/BCL2/SYK/ARID1B/TIAM1/ETV5/ACE/RFX3/CDKL3/HDAC6/CAMK2B/MECP2/ZFYVE27/IST1/STAT5B/SS18L1	24
GO:0051345	positive regulation of hydrolase activity	24/967	46/1831	0.59468	0.999326	0.999326	ARHGAP6/GNA12/SOS1/SYK/FOXL2/TIAM1/THY1/SNX18/USP50/RGS6/GARNL3/APAF1/RAPGEF3/SIRT1/TANK/GPR65/PKP4/ARHGAP27/CARD8/AGAP1/AGAP4/SRGAP2/TBC1D9B/NET1	24
GO:0002064	epithelial cell development	10/967	19/1831	0.59866	0.999326	0.999326	WNT7B/RAP2C/FEM1B/ASXL1/TFCP2L1/RFX3/RAPGEF3/C1GALT1/FRZB/IKBKB	10
GO:0003333	amino acid transmembrane transport	10/967	19/1831	0.59866	0.999326	0.999326	SLC38A3/SLC7A6/SLC6A6/SLC1A2/SLC6A13/SFXN2/SLC25A13/SLC11A1/RGS2/SFXN1	10
GO:0006997	nucleus organization	10/967	19/1831	0.59866	0.999326	0.999326	AFF2/SPAST/NECTIN2/USP50/SIRT1/WBP2NL/ATXN7/TOR1AIP1/AHCTF1/AGFG1	10
GO:0010001	glial cell differentiation	10/967	19/1831	0.59866	0.999326	0.999326	TTC21B/METTL3/TLR4/FGF10/CUL4B/WDR1/ZEB2/IFNGR1/B4GALT5/MECP2	10
GO:0010927	cellular component assembly involved in morphogenesis	10/967	19/1831	0.59866	0.999326	0.999326	ACTN2/CCDC136/NECTIN2/FIG4/WDR1/PRKD1/EPB41L3/LMOD1/ANKRD23/AGFG1	10
GO:0048024	regulation of mRNA splicing, via spliceosome	10/967	19/1831	0.59866	0.999326	0.999326	RBM25/FMR1/NPM1/KHDRBS1/WDR77/THRAP3/SRSF4/YTHDC1/RBFOX1/NCBP1	10
GO:0060078	regulation of postsynaptic membrane potential	10/967	19/1831	0.59866	0.999326	0.999326	TBC1D24/GLRB/GABRA2/TMEM108/GABRR2/KCNA1/GRIN3A/IGSF11/MECP2/NETO1	10
GO:0072593	reactive oxygen species metabolic process	10/967	19/1831	0.59866	0.999326	0.999326	SIRT3/TLR4/BCL2/SYK/BECN1/SOD2/ARG2/HDAC6/ITGB2/DUOXA1	10
GO:1901136	carbohydrate derivative catabolic process	10/967	19/1831	0.59866	0.999326	0.999326	NT5E/APOBEC3D/APOBEC3F/HGSNAT/DPYD/GPD1L/ENTPD4/ENPP4/AOAH/MLYCD	10
GO:0048880	sensory system development	25/967	48/1831	0.599148	0.999326	0.999326	NECTIN3/STAU2/SP3/WNT7B/PKNOX1/RAX/SOS1/BCL2/FOXL2/SPRED1/FGF10/THY1/TFAP2B/SHROOM2/CABP4/MITF/DZANK1/FGF9/ALDH1A3/NHS/TMEM215/FAT3/MDM1/NECTIN1/ATP2B4	25
GO:0007049	cell cycle	106/967	203/1831	0.600973	0.999326	0.999326	ATRIP/SRA1/KLHL18/HTT/MX2/RNF2/RAD50/SHB/HGF/EXOC7/TP53BP1/SPDL1/RPTOR/SMARCAD1/METTL3/PTPRK/NPM1/TOP3A/TESMIN/MAP2K6/VASH1/SPAST/INTS7/EPS8/TBCD/BCL2/ING5/ARID1B/SMC4/ADARB1/KIAA1614/GPSM2/TOPBP1/KHDRBS1/SPIRE1/SETDB2/KIF3A/ALMS1/FGF10/SNX18/MCPH1/FEM1B/CUL4B/PINX1/BECN1/ZNF268/USP9X/NEK10/C6orf89/THAP5/IPO7/KIF15/USP44/MARF1/RBL1/EXOC2/TMEM8B/TMEM14B/MCMDC2/ING1/RAB11FIP3/CCDC8/FBXW11/WDR76/TOP…	106
GO:0016032	viral process	26/967	50/1831	0.603469	0.999326	0.999326	NECTIN3/FMR1/WWP2/APOBEC3D/APOBEC3F/MGAT2/BCL2/ADARB1/CANX/ST3GAL3/NECTIN2/STAT1/BECN1/CD209/EIF2AK2/MAVS/TOP2B/POU2F3/HMGA2/CCR5/TRIM13/IDE/IST1/NECTIN1/NCAM1/GFI1	26
GO:0007596	blood coagulation	11/967	21/1831	0.60354	0.999326	0.999326	TFPI2/GNA12/TLR4/SYK/ADRA2A/DGKE/F5/THBD/HPS5/ENPP4/MMRN1	11
GO:0030177	positive regulation of Wnt signaling pathway	11/967	21/1831	0.60354	0.999326	0.999326	TTC21B/SEMA5A/FGF10/ZEB2/WNK2/DIXDC1/FGF9/SULF1/GPRC5B/PPM1A/SMURF2	11
GO:0042129	regulation of T cell proliferation	11/967	21/1831	0.60354	0.999326	0.999326	TNFRSF13C/SOS1/SYK/IDO1/CD209/CBLB/SH3RF1/TNFSF18/TNFRSF9/ARG2/STAT5B	11
GO:0045637	regulation of myeloid cell differentiation	11/967	21/1831	0.60354	0.999326	0.999326	FAM210B/RPTOR/SLC9B2/TLR4/HOXB8/STAT1/BRD1/ZFPM1/MITF/CAMK4/STAT5B	11
GO:0045732	positive regulation of protein catabolic process	11/967	21/1831	0.60354	0.999326	0.999326	FMR1/VIP/CUL4B/ADRA2A/CBLB/USP13/SH3RF2/SH3RF1/TIPARP/IDE/UBR3	11
GO:0050817	coagulation	11/967	21/1831	0.60354	0.999326	0.999326	TFPI2/GNA12/TLR4/SYK/ADRA2A/DGKE/F5/THBD/HPS5/ENPP4/MMRN1	11
GO:0052548	regulation of endopeptidase activity	11/967	21/1831	0.60354	0.999326	0.999326	SERPINB8/HGF/SYK/FOXL2/USP50/APAF1/SIRT1/SH3RF1/CAAP1/CARD8/CAST	11
GO:0090174	organelle membrane fusion	11/967	21/1831	0.60354	0.999326	0.999326	VIPAS39/VTI1A/VAMP4/VPS41/STX7/PLEKHM1/DOC2B/SYT11/VCPIP1/STX2/SPG11	11
GO:0050778	positive regulation of immune response	39/967	75/1831	0.603998	0.999326	0.999326	IRF4/SHB/TP53BP1/SEC14L1/MAP2K6/TLR4/BRAF/SOS1/BCL2/SYK/SHLD2/KHDRBS1/NECTIN2/IDO1/IGHG3/IRAK4/THY1/C4B/EIF2AK2/SMPDL3B/USP50/STX7/CBLB/NCR3/ERBIN/MAVS/PRKD1/MAP3K7/SIRT1/SIN3A/HFE/ITGB2/RC3H2/GCSAM/CARD8/SLC11A1/STAT5B/GFI1/IKBKB	39
GO:0030900	forebrain development	27/967	52/1831	0.607656	0.999326	0.999326	TTC21B/WNT7B/SEMA5A/METTL3/RAX/ATP1B2/KDM6B/FGF10/MCPH1/WDR89/TMEM14B/EPHA5/SLC1A2/TMEM108/FOXB1/TOP2B/KCNA1/APAF1/SIN3A/DIXDC1/FAT4/ALDH1A3/SRGAP2/MECP2/ATP2B4/FUT10/C21orf91	27
GO:0010557	positive regulation of macromolecule biosynthetic process	151/967	289/1831	0.607969	0.999326	0.999326	WWTR1/SRA1/FMR1/IRF4/VIP/CAMTA1/PTOV1/HK1/CCBE1/SORBS1/WWP2/SLC25A37/TCF4/SP3/SLC38A3/TTC21B/HGF/DYRK2/TP53BP1/PKNOX1/RPTOR/RAP2C/METTL3/RAX/E2F5/KMT2A/NPM1/WDR43/YTHDF1/GMEB2/STK16/MAP2K6/TLR4/ZNF493/UBTF/BRAF/HOXD3/SYK/FOXL2/ARID1B/ZNF516/SHLD2/ZNF208/KHDRBS1/ACTN2/HEY2/KDM6B/KDM4C/CAND1/WWOX/ELK4/IDO1/FGF10/THRA/STAT1/WWC1/ZNF496/ETV5/ETV6/ZNF268/EIF2AK2/WDR77/ZNF300/HOXA4/UBE3A/ASXL1/ADRA2A/T…	151
GO:0017157	regulation of exocytosis	12/967	23/1831	0.60819	0.999326	0.999326	FMR1/RAB33B/BRAF/SYK/ADRA2A/SYT6/STXBP5/PPFIA2/ITGB2/DOC2B/ATP2A2/SYT11	12
GO:0021543	pallium development	12/967	23/1831	0.60819	0.999326	0.999326	KDM6B/MCPH1/TMEM14B/EPHA5/TMEM108/KCNA1/DIXDC1/FAT4/SRGAP2/MECP2/ATP2B4/FUT10	12
GO:0031047	regulatory ncRNA-mediated gene silencing	12/967	23/1831	0.60819	0.999326	0.999326	FMR1/WTIP/METTL3/MIR29B2CHG/ERI1/AGO1/AGO4/TNRC6B/NCBP1/MECP2/NCBP2/PUS10	12
GO:0031348	negative regulation of defense response	12/967	23/1831	0.60819	0.999326	0.999326	NT5E/HGF/METTL3/SEC14L1/SYK/EXTL3/SMPDL3B/ERBIN/ARG2/CARD8/SYT11/AOAH	12
GO:0031396	regulation of protein ubiquitination	12/967	23/1831	0.60819	0.999326	0.999326	NPM1/PINX1/UBE3A/USP44/CBLB/WDR48/NDFIP2/SH3RF2/HUWE1/USP4/ANGPT1/ARRDC4	12
GO:0043588	skin development	12/967	23/1831	0.60819	0.999326	0.999326	ERRFI1/SOS1/BCL2/EXTL3/FGF10/WDR48/GORAB/TFAP2B/ASAH1/POU2F3/ITGA3/KAZN	12
GO:0098656	monoatomic anion transmembrane transport	12/967	23/1831	0.60819	0.999326	0.999326	SLC6A1/ANO5/ABCC4/GLRB/TCAF1/ABCC9/GABRA2/SLC19A1/SLC1A2/GABRR2/SLC4A7/KCNT2	12
GO:0098876	vesicle-mediated transport to the plasma membrane	12/967	23/1831	0.60819	0.999326	0.999326	SYS1/VTI1A/ACSL3/VAMP4/ACTN2/ZDHHC2/ATP2C1/SNX7/EXOC2/RAB11FIP3/ARFRP1/CCDC93	12
GO:1901617	organic hydroxy compound biosynthetic process	12/967	23/1831	0.60819	0.999326	0.999326	INSIG1/HRH1/HMGCS1/IP6K2/TPH1/ZEB2/ASAH1/SIRT1/SPTLC1/SLC45A2/GFI1/ASAH2	12
GO:0048699	generation of neurons	98/967	188/1831	0.608997	0.999326	0.999326	BDNF/FMR1/CAPRIN1/TBC1D24/STAU2/TCF4/TTC21B/ACSL3/WNT7B/SEMA5A/METTL3/YTHDF1/ATP1B2/SPAST/BRAF/SOS1/TBCD/ENAH/HOXD3/BCL2/ADARB1/TIAM1/KCNQ3/HEY2/IRX5/THY1/CUL4B/ETV5/KALRN/BICDL1/BECN1/USP9X/FIG4/WHRN/NCS1/HEYL/NEXN/KIAA0319L/EPHA5/EFHC2/TMEM108/SOD2/UHMK1/FOXB1/MYEF2/PRKD1/TOP2B/KCNA1/ST8SIA2/SH3RF1/BEND6/ZDHHC17/FZD1/LRP12/SETX/SIN3A/SULT4A1/TANC2/EPB41L3/CABP4/CDKL3/ITGA3/HDAC6/ADGRB3/PPFIA2/S…	98
GO:0033043	regulation of organelle organization	76/967	146/1831	0.609788	0.999326	0.999326	TTBK2/MFF/HTT/MID1/G3BP2/CAPRIN1/RAD50/STAU2/HGF/SPDL1/ARHGAP6/SEMA5A/RICTOR/NPM1/FCHSD1/RAB33B/BICD2/SPAST/EPS8/BRAF/TBCD/ARID1B/SMC4/ARPIN/GPSM2/ACTN2/SPIRE1/SETDB2/ALMS1/SNX18/MCPH1/PINX1/BECN1/WDR1/RHPN2/USP44/ARPC5L/ZEB2/SNX7/STX18/NEXN/EPHA5/RAB11FIP3/CCDC8/CAPN10/MAVS/PRKD1/TRIM36/FMN1/RAPGEF3/TMEM67/MPDZ/HUWE1/MIEF1/GPR65/WHAMM/HDAC6/TRIM54/LMOD1/SURF4/DIXDC1/DOC2B/ATXN7/ARHGAP40/PPARGC1A…	76
GO:0019752	carboxylic acid metabolic process	53/967	102/1831	0.610566	0.999326	0.999326	INSIG1/YARS1/GATB/THEM4/HK1/GLDC/ALDH4A1/ACSL3/ETFBKMT/RPTOR/BTD/CPT1A/FTCD/PTGS1/SYK/FPGS/LIPT2/ADH6/IDO1/ACAD10/TPH1/ADH1B/ALDH5A1/DPYD/DHFR2/PRXL2B/SLC19A1/BHMT2/IDO2/AIG1/ASAH1/SIRT1/GCDH/ARG2/FARSB/ALDH1A3/MBLAC2/PTGR3/SLC25A13/PRXL2C/PPARGC1A/SLC45A2/ANKRD23/MECP2/AOAH/SLC25A32/LDHD/ME2/ATP2B4/MLYCD/ELOVL7/UST/ASAH2	53
GO:0051050	positive regulation of transport	53/967	102/1831	0.610566	0.999326	0.999326	MFF/SIRT3/LMAN2/FMR1/HTT/VIP/SORBS1/SLC38A3/ACSL3/ABCA7/MAP2K6/TLR4/ATP1B2/BRAF/SLC6A1/SYK/FOXL2/KHDRBS1/ACTN2/JPH2/TCAF1/ZDHHC2/THY1/C4B/ADRA2A/ATP2C1/GPD1L/STXBP5/STX18/WNK2/SLC1A2/CAPN10/MAVS/PRKD1/RAPGEF3/SIRT1/HUWE1/MIEF1/STIM1/TM7SF3/ZFAND1/HFE/ITGB2/DOC2B/SLC11A1/AKAP9/ANGPT1/MECP2/NCBP2/APLNR/DNM1L/STIMATE/PPM1A	53
GO:0051051	negative regulation of transport	28/967	54/1831	0.611718	0.999326	0.999326	INSIG1/YRDC/FMR1/VIP/WWP2/RIN3/ERLEC1/ABCA7/YWHAQ/RAB33B/YOD1/BRAF/BCL2/ACTN2/ACE/ADRA2A/UBE2J1/RAB11FIP3/NDFIP2/PRKD1/RAB11FIP1/TIFAB/GNAZ/SYT11/ANGPT1/RGS2/ISCU/UBR3	28
GO:0006909	phagocytosis	13/967	25/1831	0.612639	0.999326	0.999326	LMAN2/VIPAS39/ABCA7/TLR4/SYK/GULP1/C4B/BECN1/ITGB2/MESD/SLC11A1/SYT11/SPG11	13
GO:0016051	carbohydrate biosynthetic process	13/967	25/1831	0.612639	0.999326	0.999326	SORBS1/HRH1/DYRK2/MGAT2/ST3GAL3/FUT2/SIRT1/FUT5/HS2ST1/SLC25A13/PPARGC1A/UST/FUT10	13
GO:0043543	protein acylation	13/967	25/1831	0.612639	0.999326	0.999326	NAA30/ING5/ZDHHC2/ZDHHC11/NFYB/MAP3K7/SIRT1/ZDHHC17/HDAC6/GOLGA7B/PPARGC1A/SET/PPM1A	13
GO:0045017	glycerolipid biosynthetic process	13/967	25/1831	0.612639	0.999326	0.999326	AGPAT5/ACSL3/TTC7A/INPP4B/IP6K2/BECN1/FIG4/PLD1/MTMR1/DGKE/SIRT1/EFR3A/SOCS2	13
GO:0051049	regulation of transport	111/967	213/1831	0.614699	0.999326	0.999326	INSIG1/MFF/YRDC/SIRT3/LMAN2/FMR1/HTT/MX2/VIP/SORBS1/WWP2/RIN3/ERLEC1/SLC38A3/TTC21B/ACSL3/PSEN2/ABCA7/KCNAB2/YWHAQ/SLC9B2/RAB33B/MAP2K6/TLR4/ATP1B2/YOD1/BRAF/CPT1A/SLC6A1/BCL2/SYK/FOXL2/VAMP4/TIAM1/ADORA3/KCNQ3/KHDRBS1/ACTN2/JPH2/PTPN1/TCAF1/FGF10/ZDHHC2/THY1/C4B/NKAIN3/WWC1/ACE/ADRA2A/ATP2C1/SYT6/UBE2J1/GPD1L/STXBP5/STX18/PLD1/RFX3/EPHA5/WNK2/RAB11FIP3/ARFGAP1/NDFIP2/SLC1A2/CAPN10/TFAP2B/MAVS/UH…	111
GO:0010564	regulation of cell cycle process	42/967	81/1831	0.615069	0.999326	0.999326	ATRIP/KLHL18/RAD50/TP53BP1/SPDL1/RPTOR/NPM1/SPAST/INTS7/BCL2/ARID1B/SMC4/GPSM2/TOPBP1/ALMS1/FGF10/MCPH1/FEM1B/CUL4B/PINX1/BECN1/NEK10/USP44/RBL1/TMEM14B/RAB11FIP3/CCDC8/WDR76/STXBP4/TMEM67/SIRT1/SIN3A/HMGA2/PKP4/MAP10/RANBP1/ANAPC4/MECP2/MDM1/AHCTF1/BORA/ATP2B4	42
GO:0030003	intracellular monoatomic cation homeostasis	29/967	56/1831	0.615665	0.999326	0.999326	HTT/SLC24A1/SLC9A7/TESMIN/ATP1B2/BCL2/TTC7A/XCR1/JPH2/ATP6V1B2/THY1/UBE3A/ATP2C1/ATP4B/SLC24A4/PRKD1/STIM1/CCR5/SLC10A7/SLC4A7/HFE/MCOLN2/SLC11A1/ATP2A2/SLC45A2/ANKRD9/ISCU/APLNR/ATP2B4	29
GO:0043068	positive regulation of programmed cell death	29/967	56/1831	0.615665	0.999326	0.999326	CTSC/HTT/UBE2Z/MAP2K6/TLR4/EEF1E1/BCL2/SYK/ING5/FOXL2/IP6K2/WWOX/IDO1/BECN1/ZNF268/ACE/SOD2/CAPN10/TFAP2B/APAF1/ST8SIA2/SIRT1/SHQ1/HTATIP2/ALDH1A3/ATP2A2/FRZB/DNM1L/NET1	29
GO:0006470	protein dephosphorylation	14/967	27/1831	0.616911	0.999326	0.999326	HTT/CAMTA1/PTPRK/GNA12/PTPN1/PTPRE/PTPRQ/FBXW11/PTPN21/PTPN18/PTPRA/PPM1A/IKBKB/PPP2R5C	14
GO:0042063	gliogenesis	14/967	27/1831	0.616911	0.999326	0.999326	TTC21B/METTL3/TLR4/ATP1B2/TIAM1/FGF10/CUL4B/ETV5/WDR1/ZEB2/IFNGR1/B4GALT5/SRGAP2/MECP2	14
GO:0051321	meiotic cell cycle	14/967	27/1831	0.616911	0.999326	0.999326	RAD50/METTL3/TOP3A/TESMIN/SMC4/SPIRE1/MARF1/MCMDC2/TOP2B/AGO4/HSF2BP/WBP2NL/ANAPC4/MSH6	14
GO:0060541	respiratory system development	14/967	27/1831	0.616911	0.999326	0.999326	CCBE1/ERRFI1/SP3/WNT7B/FGF10/THRA/SMCHD1/ACE/ASXL1/ITGA3/FGF9/RC3H2/ALDH1A3/MECP2	14
GO:0032879	regulation of localization	134/967	257/1831	0.618333	0.999326	0.999326	WWTR1/TTBK2/INSIG1/MFF/YRDC/SIRT3/LMAN2/BDNF/FMR1/HTT/MX2/VIP/SORBS1/WWP2/RIN3/ERLEC1/SLC38A3/TTC21B/ACSL3/PSEN2/ABCA7/KCNAB2/NPM1/YWHAQ/SLC9B2/RAB33B/MAP2K6/TLR4/ATP1B2/YOD1/BRAF/CPT1A/SLC6A1/BCL2/SYK/FOXL2/VAMP4/KIAA1614/TIAM1/GPSM2/ADORA3/KCNQ3/KHDRBS1/ACTN2/XCR1/JPH2/PTPN1/TCAF1/FGF10/ZDHHC2/THY1/C4B/NKAIN3/WWC1/PINX1/BECN1/ACE/ADRA2A/IPO7/ATP2C1/SYT6/UBE2J1/GPD1L/STX7/STXBP5/STX18/PLD1/RFX3/…	134
GO:0010033	response to organic substance	156/967	299/1831	0.620151	0.999326	0.999326	INSIG1/CTSC/SRA1/MX2/NT5E/IFNAR2/SORBS1/RAD23B/HRH1/GLDC/ERLEC1/FAM210B/WNT7B/GAB1/ABCA7/RPTOR/TNFRSF13C/METTL3/NPM1/ZNF236/SLC9B2/MAP2K6/TLR4/EEF1E1/YOD1/EPS8/BRAF/CPT1A/SOS1/SLC6A1/FAM8A1/UGGT1/BCL2/POR/SYK/ARID1B/SH3BP4/DNAJB14/TIAM1/CANX/KCNQ3/IP6K2/EXTL3/TOLLIP/ACTN2/SELL/XCR1/KDM6B/KDM4C/WDR35/ADH6/IDO1/PTPN1/FGF10/THRA/ABCC9/STAT1/IRAK4/PTPRE/ADAM23/C4B/AQP9/BECN1/SLC22A5/EIF2AK2/UBE3A/ACE…	156
GO:0051253	negative regulation of RNA metabolic process	91/967	175/1831	0.620596	0.999326	0.999326	WWTR1/FMR1/MXD4/VIP/ZNF19/WTIP/RNF2/WWP2/ZNF451/APOBEC3D/SP3/APOBEC3F/LRPPRC/PTPRK/NPM1/YWHAQ/CBX6/FOXL2/L3MBTL4/BHLHE40/KHDRBS1/HEY2/SETDB2/JPH2/KLF8/ELK4/ZNF436/THRA/HOXB8/STAT1/MCPH1/WWC1/ETV5/ETV6/ZNF268/USP9X/THAP5/ZNF566/THRAP3/ZNF529/RIOX2/HEYL/ZEB2/RBL1/TFCP2L1/RFX3/MIER3/ING1/FBXW11/TFAP2B/MOSPD1/JARID2/E2F6/SIRT1/BEND6/FZD1/SIN3A/MDM4/TRERF1/LRRFIP1/HDAC6/HMGA2/ZFPM1/MITF/SRSF4/SHQ1/SNX…	91
GO:0001894	tissue homeostasis	15/967	29/1831	0.621023	0.999326	0.999326	WWTR1/NT5E/KMT2A/TLR4/ATP1B2/BCL2/SYK/IGHG3/SLC22A5/WHRN/ZEB2/PLEKHM1/JCHAIN/POC1B/ANGPT1	15
GO:0060249	anatomical structure homeostasis	15/967	29/1831	0.621023	0.999326	0.999326	WWTR1/NT5E/KMT2A/TLR4/ATP1B2/BCL2/SYK/IGHG3/SLC22A5/WHRN/ZEB2/PLEKHM1/JCHAIN/POC1B/ANGPT1	15
GO:0070372	regulation of ERK1 and ERK2 cascade	15/967	29/1831	0.621023	0.999326	0.999326	SIRT3/ABCA7/TLR4/BRAF/SYK/TIAM1/SPRED1/PTPN1/FGF10/NEK10/WNK2/VRK3/ZDHHC17/PRXL2C/ANGPT1	15
GO:0030036	actin cytoskeleton organization	44/967	85/1831	0.622067	0.999326	0.999326	SORBS1/STAU2/ARHGAP6/SEMA5A/RICTOR/FCHSD1/TPM4/EPS8/BRAF/ENAH/BCL2/ARPIN/ACTN2/SPIRE1/PTPN1/ALMS1/FGF10/WDR1/ADRA2A/ATP2C1/RHPN2/FMNL3/ARPC5L/ZEB2/FRMD5/EPHA5/CAPN10/PRKD1/SHROOM2/FMN1/RAPGEF3/EPB41L3/GPR65/WHAMM/LMOD1/DIXDC1/ARHGAP40/STARD13/ANKRD23/SPECC1/ARFGEF1/MYO3B/KCTD13/IKBKB	44
GO:0007399	nervous system development	158/967	303/1831	0.624913	0.999326	0.999326	TTBK2/CTSC/BDNF/FMR1/CAPRIN1/TBC1D24/STAU2/TCF4/TTC21B/ACSL3/WNT7B/SEMA5A/METTL3/RAX/TRAK2/AFF2/YTHDF1/YWHAQ/IGSF9B/TLR4/ATP1B2/SPAST/BTD/SERF1B/BRAF/SOS1/TBCD/ENAH/HOXD3/BCL2/ARID1B/ADARB1/TIAM1/GLRB/BHLHE40/KCNQ3/HEY2/KDM6B/IRX5/TMEM107/FGF10/ZDHHC2/HOXB8/THY1/FTSJ1/ADAM23/MCPH1/CUL4B/GABRA2/ETV5/KALRN/BICDL1/BECN1/ETV6/USP9X/ALDH5A1/FIG4/WDR1/UBE3A/ACE/WDR89/WHRN/RFX8/NCS1/HEYL/ZEB2/SPG7/NEXN/…	158
GO:0016042	lipid catabolic process	16/967	31/1831	0.624992	0.999326	0.999326	ETFBKMT/CPT1A/ACAD10/THRA/ADRA2A/SMPDL3B/BCO1/PLD1/AIG1/ASAH1/GCDH/ABHD12B/ENPP6/AOAH/MLYCD/ASAH2	16
GO:0043484	regulation of RNA splicing	16/967	31/1831	0.624992	0.999326	0.999326	RBM25/FMR1/AFF2/NPM1/KHDRBS1/GRSF1/WDR77/THRAP3/TRRAP/SETX/SRSF4/MBNL3/YTHDC1/ATXN7/RBFOX1/NCBP1	16
GO:0043523	regulation of neuron apoptotic process	16/967	31/1831	0.624992	0.999326	0.999326	BDNF/BRAF/BCL2/SOD2/TFAP2B/FOXB1/ST8SIA2/SIRT1/FZD1/DNAJC5/SNX6/PPARGC1A/SET/ANGPT1/RETREG1/MECP2	16
GO:0048705	skeletal system morphogenesis	16/967	31/1831	0.624992	0.999326	0.999326	INSIG1/ANKRD11/RAB33B/HOXD3/WWOX/IRX5/TMEM107/THRA/HOXB8/HOXA4/WDR48/MMP13/FMN1/TIFAB/MMP16/TIPARP	16
GO:0019725	cellular homeostasis	45/967	87/1831	0.625462	0.999326	0.999326	HTT/SLC24A1/HK1/SLC9A7/SLC38A3/WNT7B/NPM1/ZNF236/TESMIN/SLC9B2/ATP1B2/BCL2/TTC7A/TIAM1/XCR1/JPH2/ATP6V1B2/THY1/UBE3A/ACE/ADRA2A/ATP2C1/ATP4B/SLC24A4/EPHA5/SOD2/PRKD1/STXBP4/SIRT1/SIN3A/STIM1/CCR5/SLC10A7/SLC4A7/HFE/MCOLN2/SLC11A1/PPARGC1A/ATP2A2/SLC45A2/IDE/ANKRD9/ISCU/APLNR/ATP2B4	45
GO:1902531	regulation of intracellular signal transduction	105/967	202/1831	0.628116	0.999326	0.999326	WWTR1/SIRT3/HTT/MID1/CAMTA1/WTIP/HGF/WNT7B/DYRK2/ABCA7/RPTOR/ARHGAP6/SEMA5A/RICTOR/GNA12/NPM1/TMEM9B/MAP2K6/TLR4/EEF1E1/EPS8/BRAF/SOS1/BCL2/SYK/SH3BP4/TIAM1/EXTL3/NBR1/SPRED1/KBTBD7/PTPN1/FGF10/STAT1/IRAK4/TMEM127/WWC1/FEM1B/KALRN/BECN1/USP9X/NEK10/EIF2AK2/RNF152/UBE3A/ADRA2A/TRIM52/ATP2C1/GPD1L/USP44/GIT2/SLC24A4/WNK2/ARFGAP1/NDFIP2/SH3RF2/FBXW11/RIPOR2/GARNL3/SOD2/WDR76/MAVS/VRK3/PRKD1/MAP3K7/R…	105
GO:0009725	response to hormone	46/967	89/1831	0.628791	0.999326	0.999326	INSIG1/SRA1/SORBS1/WNT7B/GAB1/BRAF/SOS1/BCL2/POR/ARID1B/ACTN2/KDM4C/PTPN1/THRA/STAT1/PTPRE/UBE3A/ACE/ADRA2A/HEYL/UFSP2/SLC24A4/GCNT1/CAPN10/PRKD1/STXBP4/MEAK7/MAP3K7/SIRT1/SH3RF1/PNPT1/GRB14/TRERF1/ITGA3/PTGFR/HDAC6/STAT4/SRSF4/SOCS2/RBBP7/FBXO32/STAT5A/IDE/SFR1/STAT5B/PTPRA	46
GO:0019932	second-messenger-mediated signaling	17/967	33/1831	0.628831	0.999326	0.999326	HTT/CAMTA1/DYRK2/SYK/XCR1/SLC24A4/EPHA5/PRKD1/RAPGEF3/KSR2/PTGFR/ACKR2/CCR5/ATP2A2/APLNR/ATP2B4/STIMATE	17
GO:0030111	regulation of Wnt signaling pathway	17/967	33/1831	0.628831	0.999326	0.999326	WWTR1/TTC21B/SEMA5A/TIAM1/WWOX/FGF10/ZEB2/WNK2/FZD1/ITGA3/DIXDC1/FGF9/SULF1/FRZB/GPRC5B/PPM1A/SMURF2	17
GO:0090150	establishment of protein localization to membrane	17/967	33/1831	0.628831	0.999326	0.999326	SYS1/NECTIN3/MFF/ACSL3/TOMM22/GORASP2/BRAF/TCAF1/ZDHHC2/ZDHHC11/ATP2C1/ARFRP1/MIEF1/ITGB2/GOLGA7B/SYNE3/TOMM5	17
GO:0032787	monocarboxylic acid metabolic process	33/967	64/1831	0.630438	0.999326	0.999326	INSIG1/THEM4/HK1/ACSL3/ETFBKMT/RPTOR/BTD/CPT1A/FTCD/PTGS1/ADH6/IDO1/ACAD10/ADH1B/ALDH5A1/PRXL2B/AIG1/ASAH1/SIRT1/GCDH/ALDH1A3/MBLAC2/PTGR3/PRXL2C/PPARGC1A/ANKRD23/AOAH/LDHD/ME2/MLYCD/ELOVL7/UST/ASAH2	33
GO:0009653	anatomical structure morphogenesis	171/967	328/1831	0.630561	0.999326	0.999326	WWTR1/INSIG1/NECTIN3/MFF/BDNF/CAPRIN1/WTIP/TBC1D24/RNF2/CCBE1/ERRFI1/STAU2/SHB/SP3/ANKRD11/TTC21B/HGF/WNT7B/GAB1/PKNOX1/SEMA5A/METTL3/GNA12/YTHDF1/RAB33B/NFE2L1/VASH1/SPAST/EPS8/BRAF/SOS1/TBCD/GJC1/ENAH/HOXD3/BCL2/SYK/FOXL2/ADARB1/ARPIN/TIAM1/SNX1/ACTN2/GRSF1/SPRED1/SPIRE1/CCDC136/HEY2/KDM6B/SETDB2/KDM4C/NECTIN2/WWOX/IRX5/TMEM107/FGF10/THRA/ABCC9/HOXB8/STAT1/THY1/FEM1B/KALRN/ZMYM3/USP9X/HOXA4/FIG…	171
GO:0007268	chemical synaptic transmission	47/967	91/1831	0.632059	0.999326	0.999326	BDNF/FMR1/SLC24A1/TBC1D24/HRH1/STAU2/KMT2A/FCHSD1/YTHDF1/BRAF/SLC6A1/GJC1/ADARB1/GLRB/ADORA3/KCNQ3/ZDHHC2/GABRA2/UBE3A/ACE/ADRA2A/STXBP5/DLGAP2/DGKE/SLC6A6/SLC1A2/TMEM108/GABRR2/DNAJC5/HDAC6/PPFIA2/GRIN3A/DOC2B/IGSF11/AMPH/ATP2A2/CAMK2B/SYT11/AKAP9/MECP2/NETO1/KCNC4/LIN7A/PTPRA/KCTD13/STX2/SPG11	47
GO:0098916	anterograde trans-synaptic signaling	47/967	91/1831	0.632059	0.999326	0.999326	BDNF/FMR1/SLC24A1/TBC1D24/HRH1/STAU2/KMT2A/FCHSD1/YTHDF1/BRAF/SLC6A1/GJC1/ADARB1/GLRB/ADORA3/KCNQ3/ZDHHC2/GABRA2/UBE3A/ACE/ADRA2A/STXBP5/DLGAP2/DGKE/SLC6A6/SLC1A2/TMEM108/GABRR2/DNAJC5/HDAC6/PPFIA2/GRIN3A/DOC2B/IGSF11/AMPH/ATP2A2/CAMK2B/SYT11/AKAP9/MECP2/NETO1/KCNC4/LIN7A/PTPRA/KCTD13/STX2/SPG11	47
GO:0019058	viral life cycle	18/967	35/1831	0.632551	0.999326	0.999326	NECTIN3/FMR1/WWP2/APOBEC3D/APOBEC3F/BCL2/ADARB1/NECTIN2/CD209/EIF2AK2/MAVS/TOP2B/HMGA2/CCR5/IDE/IST1/NECTIN1/NCAM1	18
GO:0032102	negative regulation of response to external stimulus	18/967	35/1831	0.632551	0.999326	0.999326	NT5E/RIN3/HGF/SEMA5A/METTL3/SEC14L1/SYK/EXTL3/SMPDL3B/ERBIN/THBD/ARG2/HDAC6/MMRN1/GRIN3A/CARD8/SYT11/AOAH	18
GO:0070925	organelle assembly	61/967	118/1831	0.636069	0.999326	0.999326	WWTR1/TTBK2/FMR1/HTT/VIPAS39/G3BP2/CAPRIN1/TTC21B/NPM1/YTHDF1/RAB33B/GORASP2/VPS36/BBOF1/CC2D2B/ABCC4/GPSM2/ACTN2/CCDC136/WDR35/NECTIN2/KIF3A/ALMS1/TMEM107/IFT22/SNX18/PTPDC1/BECN1/WDR1/RPGR/STX7/SNX7/STX18/RFX3/GORAB/RAB11FIP3/ATXN2L/RABL2B/PRKD1/ATG4C/TMEM67/JHY/VTA1/HPS5/STARD9/SSX2IP/CCDC65/HDAC6/LMOD1/POC1B/WBP2NL/MAP10/ATP2A2/DNHD1/ANKRD23/MDM1/DNAAF11/IST1/SPG11/AGFG1/AP4M1	61
GO:0045444	fat cell differentiation	19/967	37/1831	0.636161	0.999326	0.999326	WWTR1/INSIG1/ZNF516/FGF10/TPH1/ASXL1/PTPRQ/SOD2/TFAP2B/SIRT1/HDAC6/HMGA2/WDFY2/PTGR3/TMEM120B/PPARGC1A/RETREG1/RGS2/FRZB	19
GO:0045787	positive regulation of cell cycle	19/967	37/1831	0.636161	0.999326	0.999326	KLHL18/SHB/RPTOR/NPM1/SPAST/SMC4/GPSM2/FGF10/CUL4B/BECN1/C6orf89/STXBP4/MAP3K7/SIN3A/PKP4/MAP10/RANBP1/MECP2/STAT5B	19
GO:0050900	leukocyte migration	19/967	37/1831	0.636161	0.999326	0.999326	RIN3/EPS8/SOS1/SYK/SELL/IRAK4/THY1/WDR1/RIPOR2/GCNT1/TNFSF18/ITGA3/CCR5/STK10/ITGB2/GCSAM/MCOLN2/DNM1L/STAT5B	19
GO:0071805	potassium ion transmembrane transport	19/967	37/1831	0.636161	0.999326	0.999326	SLC24A1/WWP2/SLC9A7/KCNAB2/ATP1B2/KCNQ3/ACTN2/ABCC9/ATP4B/SLC24A4/KCNA1/KCNJ13/KCNQ5/KCNN3/KCNT2/AKAP9/NETO1/KCNC4/KCNJ5	19
GO:1901873	regulation of post-translational protein modification	19/967	37/1831	0.636161	0.999326	0.999326	NPM1/TOLLIP/PINX1/UBE3A/USP44/NFYB/CBLB/WDR48/NDFIP2/SH3RF2/SIRT1/TANK/HUWE1/PPARGC1A/SET/USP4/ANGPT1/MECP2/ARRDC4	19
GO:0008285	negative regulation of cell population proliferation	49/967	95/1831	0.638416	0.999326	0.999326	VIP/SEMA5A/KMT2A/PTPRK/GNA12/NPM1/VASH1/EEF1E1/BCL2/ING5/ADARB1/SH3BP4/ARPIN/ADORA3/TP53I11/IDO1/FGF10/STAT1/THY1/TMEM127/TNFRSF13B/PINX1/BECN1/ZNF268/EIF2AK2/WDR77/CBLB/WNK2/ING1/SOD2/TFAP2B/PTHLH/JARID2/MDM4/TNFRSF9/ARG2/CDKL3/ITGA3/HDAC6/FSTL4/PPARGC1A/SULF1/ETV3/CBFA2T2/FAT3/STRN/FRZB/GFI1/PPP2R5C	49
GO:0014070	response to organic cyclic compound	49/967	95/1831	0.638416	0.999326	0.999326	INSIG1/NT5E/HRH1/GLDC/FAM210B/WNT7B/NPM1/BRAF/CPT1A/SLC6A1/BCL2/TIAM1/KCNQ3/KDM4C/FGF10/ABCC9/STAT1/AQP9/BECN1/UBE3A/ACE/HEYL/UFSP2/SLC1A2/SOD2/MAVS/PRKD1/TOP2B/THBD/ST8SIA2/RAPGEF3/SIRT1/SH3RF1/SIN3A/PNPT1/TRERF1/PTGFR/HDAC6/CCR5/RNLS/TIPARP/SOCS2/GNAZ/RBBP7/AKAP9/FBXO32/MECP2/STAT5B/ATP2B4	49
GO:0045597	positive regulation of cell differentiation	49/967	95/1831	0.638416	0.999326	0.999326	WWTR1/BDNF/CAPRIN1/TBC1D24/STAU2/SHB/TCF4/FAM210B/HGF/WNT7B/RPTOR/SEMA5A/SLC9B2/BRAF/HOXD3/BCL2/SYK/ARID1B/TIAM1/STAT1/TPH1/BRD1/ETV5/ZNF268/ACE/IPO7/HEYL/ZEB2/RFX3/SLC6A6/RIPOR2/SOD2/PRKD1/SIRT1/BEND6/SIN3A/CDKL3/HDAC6/WDFY2/SOCS2/CAMK2B/DUOXA1/MECP2/FRZB/ZFYVE27/IST1/STAT5B/GPRC5B/SS18L1	49
GO:0022008	neurogenesis	109/967	210/1831	0.638479	0.999326	0.999326	BDNF/FMR1/CAPRIN1/TBC1D24/STAU2/TCF4/TTC21B/ACSL3/WNT7B/SEMA5A/METTL3/TRAK2/YTHDF1/TLR4/ATP1B2/SPAST/BRAF/SOS1/TBCD/ENAH/HOXD3/BCL2/ADARB1/TIAM1/BHLHE40/KCNQ3/HEY2/IRX5/FGF10/THY1/FTSJ1/CUL4B/ETV5/KALRN/BICDL1/BECN1/ETV6/USP9X/FIG4/WDR1/ACE/WHRN/NCS1/HEYL/ZEB2/NEXN/KIAA0319L/EPHA5/EFHC2/IFNGR1/TMEM108/SOD2/UHMK1/FOXB1/MYEF2/PRKD1/TOP2B/KCNA1/ST8SIA2/SH3RF1/BEND6/ZDHHC17/FZD1/LRP12/SETX/SIN3A/SULT…	109
GO:0048583	regulation of response to stimulus	227/967	435/1831	0.639187	0.999326	0.999326	WWTR1/ATRIP/INSIG1/CTSC/IGSF1/SIRT3/BDNF/HTT/MID1/IRF4/CAMTA1/NT5E/IFNAR2/WTIP/TBC1D24/CCBE1/SORBS1/WWP2/RIN3/ZNF451/ERRFI1/SHB/TTC21B/HGF/WNT7B/DYRK2/TP53BP1/ABCA7/RPTOR/APOBEC3F/ARHGAP6/SEMA5A/RICTOR/METTL3/ACP3/GNA12/SNX25/NPM1/SEC14L1/TMEM9B/YTHDF1/MAP2K6/TLR4/EEF1E1/EPS8/BRAF/SOS1/BCL2/SYK/ING5/ARID1B/SH3BP4/TIAM1/SHLD2/EXTL3/NBR1/KHDRBS1/SPRED1/SPIRE1/HEY2/KBTBD7/KDM4C/NECTIN2/WWOX/IDO1/PTP…	227
GO:0043161	proteasome-mediated ubiquitin-dependent protein catabolic process	36/967	70/1831	0.640617	0.999326	0.999326	WWTR1/RAD23B/WWP2/ERLEC1/ARMC8/GNA12/YOD1/FAM8A1/CANX/KBTBD7/FEM1B/USP9X/UBE3A/FBXL22/UBE2J1/USP44/SH3RF2/FBXW11/FBXO3/TMEM67/SIRT1/SH3RF1/FBXO48/DNAJC10/HFE/UBR1/WDR26/TRIM13/ANAPC4/ANKRD9/UBR3/APPBP2/UBE2G1/KCTD13/SMURF2/PPP2R5C	36
GO:0043069	negative regulation of programmed cell death	51/967	99/1831	0.644554	0.999326	0.999326	BDNF/HTT/VIP/HGF/UBE2Z/PSEN2/SEMA5A/RICTOR/NPM1/BRAF/BCL2/HEY2/IDO1/PTPN1/FGF10/BECN1/ZNF268/EIF2AK2/SH3RF2/SOD2/TFAP2B/FOXB1/SIRT1/SH3RF1/FZD1/SETX/SIN3A/DNAJC5/AGO4/MDM4/TNFSF18/ARG2/TM7SF3/PTGFR/HMGA2/CCR5/MITF/CAAP1/STRADB/HTATIP2/SNX6/CAST/SOCS2/PPARGC1A/TMEM215/SET/ANGPT1/RETREG1/MECP2/STAT5B/ASAH2	51
GO:0043933	protein-containing complex organization	134/967	258/1831	0.644913	0.999326	0.999326	TTBK2/EEF2KMT/SIRT3/MID1/IRF4/G3BP2/RNF2/TCF4/NAA40/ACSL3/TP53BP1/ABCA7/ARHGAP6/SEMA5A/SMARCAD1/RICTOR/METTL3/KMT2A/NPM1/FCHSD1/TLR4/UBTF/SPAST/EPS8/TBCD/SYK/ING5/MPP7/CBX6/ARID1B/L3MBTL4/VAMP4/DNAJB14/TIAM1/FCHO2/KCNQ3/ACTN2/SPIRE1/HEY2/KDM6B/SETDB2/KDM4C/CAND1/THRA/HGSNAT/BRD1/KLC1/BECN1/SMCHD1/C6orf89/EIF2AK2/WDR77/WDR1/ASXL1/H3C6/USP50/AGO1/DNAJB12/VPS41/RIOX2/ARPC5L/STXBP5/RBL1/GRWD1/SLC1A2/…	134
GO:0002376	immune system process	123/967	237/1831	0.645258	0.999326	0.999326	CTSC/MX2/IRF4/G3BP2/IFNAR2/HK1/RIN3/APOBEC3D/SHB/SP3/FAM210B/TP53BP1/PKNOX1/RPTOR/APOBEC3F/TNFRSF13C/METTL3/KMT2A/SEC14L1/YTHDF1/SLC9B2/MAP2K6/TLR4/EPS8/BRAF/SOS1/BCL2/SYK/ING5/ARID1B/ADARB1/SHLD2/TOLLIP/KHDRBS1/SELL/SPIRE1/XCR1/KDM6B/NECTIN2/IDO1/PTPN1/IGHG3/FGF10/THRA/HOXB8/STAT1/IRAK4/THY1/ZDHHC11/BRD1/C4B/TNFRSF13B/SLC22A5/CD209/EIF2AK2/WDR1/ACE/ASXL1/IPO7/SMPDL3B/USP50/UBE2J1/MAPK10/USP44/ST…	123
GO:1901137	carbohydrate derivative biosynthetic process	38/967	74/1831	0.647043	0.999326	0.999326	NT5E/ACSL3/ABCA7/MGAT2/UGGT1/BCL2/ST3GAL3/EXTL3/SLC25A16/B3GLCT/UBE2J1/DHFR2/FUT2/UGGT2/GCNT1/POFUT1/POMT1/ST8SIA2/FUT5/GCDH/CANT1/AK4/SLC10A7/HS2ST1/GALNT7/PRPS1/B4GALT5/SLC25A13/PPARGC1A/POGLUT1/C1GALT1/ANGPT1/DPY19L4/ARFGEF1/MLYCD/ELOVL7/UST/FUT10	38
GO:0001775	cell activation	52/967	101/1831	0.647546	0.999326	0.999326	CTSC/IRF4/SHB/SP3/TP53BP1/PKNOX1/TNFRSF13C/METTL3/KMT2A/TLR4/BRAF/SOS1/BCL2/SYK/ARID1B/SHLD2/TOLLIP/NECTIN2/IDO1/FGF10/THY1/TNFRSF13B/CD209/ADRA2A/USP44/ZEB2/CBLB/DGKE/IFNGR1/RIPOR2/NCR3/TOP2B/THBD/SH3RF1/TNFSF18/TMEM229B/TNFRSF9/ARG2/MMRN1/ZFPM1/STAT4/HFE/CAMK4/ITGB2/WBP2NL/RC3H2/RABL3/SLC11A1/SYT11/NHEJ1/STAT5B/MSH6	52
GO:0040007	growth	53/967	103/1831	0.650489	0.999326	0.999326	WWTR1/BDNF/WNT7B/RPTOR/SEMA5A/RICTOR/NPM1/SOS1/BCL2/ING5/FOXL2/ADARB1/SH3BP4/TIAM1/IP6K2/EXTL3/HEY2/FGF10/WWC1/USP9X/UBE3A/WDR48/TFCP2L1/ING1/SLC1A2/TMEM108/MMP13/PSAPL1/FMN1/JARID2/ST8SIA2/LRP12/SIN3A/PNPT1/CDKL3/HDAC6/FGF9/RC3H2/FSTL4/SOCS2/NCBP1/RBBP7/MECP2/STAT5A/RGS2/FRZB/MUSK/ZFYVE27/IST1/SORBS2/STAT5B/NET1/SPG11	53
GO:0031349	positive regulation of defense response	24/967	47/1831	0.652839	0.999326	0.999326	CTSC/IRF4/SEC14L1/MAP2K6/TLR4/SYK/NECTIN2/IDO1/IRAK4/EIF2AK2/SMPDL3B/USP50/NCR3/ERBIN/MAVS/PRKD1/MAP3K7/SIN3A/TNFSF18/CARD8/STAT5B/GFI1/GPRC5B/IKBKB	24
GO:0006954	inflammatory response	40/967	78/1831	0.653214	0.999326	0.999326	CTSC/NT5E/HK1/HRH1/HGF/RICTOR/TLR4/SYK/ADORA3/EXTL3/TOLLIP/XCR1/KDM6B/IDO1/MCPH1/C4B/EIF2AK2/SMPDL3B/USP50/ZEB2/IFNGR1/NCR3/MAVS/PRKD1/MAP3K7/TNFSF18/PTGFR/ACKR2/CCR5/HFE/CAMK4/ITGB2/CARD8/SLC11A1/SYT11/DUOXA1/AOAH/STAT5B/GPRC5B/IKBKB	40
GO:0001944	vasculature development	41/967	80/1831	0.656211	0.999326	0.999326	CCBE1/ERRFI1/SHB/WNT7B/GAB1/PKNOX1/SEMA5A/VASH1/SOS1/GJC1/SYK/SPRED1/HEY2/FGF10/ABCC9/STAT1/THY1/ACE/AGO1/FMNL3/EPN2/SOD2/POFUT1/TFAP2B/PRKD1/RAPGEF3/SIRT1/STIM1/HMGA2/ADGRB3/HTATIP2/FGF9/TIPARP/TMEM215/SULF1/STARD13/C1GALT1/ANGPT1/MECP2/APLNR/ATP2B4	41
GO:0006082	organic acid metabolic process	56/967	109/1831	0.659042	0.999326	0.999326	INSIG1/YARS1/GATB/THEM4/HK1/GLDC/ALDH4A1/ACSL3/ETFBKMT/RPTOR/BTD/CPT1A/FTCD/PTGS1/SYK/FPGS/LIPT2/ADH6/IDO1/ACAD10/TPH1/ADH1B/ALDH5A1/DPYD/DHFR2/PRXL2B/SLC19A1/BHMT2/IDO2/AIG1/ASAH1/SIRT1/GCDH/ARG2/FARSB/SULT1A1/ALDH1A3/MBLAC2/PTGR3/SLC25A13/PRXL2C/PPARGC1A/SLC45A2/ANKRD23/MECP2/AOAH/SLC25A32/STAT5A/LDHD/ME2/STAT5B/ATP2B4/MLYCD/ELOVL7/UST/ASAH2	56
GO:0006508	proteolysis	95/967	184/1831	0.661808	0.999326	0.999326	WWTR1/CTSC/USP35/FMR1/SERPINB8/CCBE1/RAD23B/WWP2/ERLEC1/HGF/ARMC8/UBE2Z/PSEN2/GNA12/USP12/VASH1/YOD1/VPS36/FAM8A1/UGGT1/SYK/FOXL2/GSAP/CANX/TOLLIP/KBTBD7/MAST4/ADAM23/AMZ1/FEM1B/CUL4B/PSME3IP1/USP9X/WDR77/UBE3A/ACE/ADRA2A/FBXL22/USP50/UBE2J1/RPGR/DNAJB12/USP44/ERO1B/KLK13/UFSP2/SPG7/USP24/USP13/RNF150/UGGT2/ATE1/NDFIP2/SH3RF2/METAP2/FBXW11/MMP13/CAPN10/ADAM28/ATG4C/FBXO3/THBD/APAF1/TMEM67/SIRT1/S…	95
GO:0030335	positive regulation of cell migration	27/967	53/1831	0.661947	0.999326	0.999326	TBC1D24/CCBE1/HGF/GAB1/SEMA5A/TLR4/BCL2/TIAM1/FGF10/THY1/ZNF268/ADRA2A/SH3RF2/RIPOR2/SOD2/PRKD1/MAP3K7/SIRT1/TNFSF18/ITGA3/HDAC6/FGF9/ANGPT1/STAT5A/DNM1L/CASS4/SMURF2	27
GO:0043065	positive regulation of apoptotic process	27/967	53/1831	0.661947	0.999326	0.999326	CTSC/HTT/UBE2Z/MAP2K6/TLR4/EEF1E1/BCL2/ING5/FOXL2/IP6K2/WWOX/IDO1/BECN1/ZNF268/ACE/SOD2/CAPN10/TFAP2B/APAF1/ST8SIA2/SIRT1/SHQ1/ALDH1A3/ATP2A2/FRZB/DNM1L/NET1	27
GO:0051249	regulation of lymphocyte activation	27/967	53/1831	0.661947	0.999326	0.999326	IRF4/SHB/TP53BP1/TNFRSF13C/METTL3/TLR4/BRAF/SOS1/BCL2/SYK/ARID1B/SHLD2/IDO1/FGF10/THY1/TNFRSF13B/CD209/CBLB/RIPOR2/SH3RF1/TNFSF18/TNFRSF9/ARG2/HFE/CAMK4/RC3H2/STAT5B	27
GO:0007005	mitochondrion organization	28/967	55/1831	0.664858	0.999326	0.999326	MFF/HTT/THEM4/SPATA18/HGF/TOMM22/TRAK2/SPATA33/TOP3A/BCL2/SPIRE1/NECTIN2/BECN1/SNX7/SPG7/SOD2/HUWE1/PNPT1/DNAJC11/MIEF1/HDAC6/GABPB1/PPARGC1A/TTC19/RETREG1/MARK2/DNM1L/TOMM5	28
GO:0042391	regulation of membrane potential	28/967	55/1831	0.664858	0.999326	0.999326	FMR1/TBC1D24/WWP2/KCNAB2/KMT2A/ATP1B2/GJC1/BCL2/GLRB/KCNQ3/ACTN2/ABCC9/GABRA2/WDR1/GPD1L/SLC24A4/TMEM108/SOD2/GABRR2/KCNA1/GRIN3A/KCNQ5/IGSF11/ATP2A2/AKAP9/MECP2/NETO1/KCNJ5	28
GO:0043009	chordate embryonic development	28/967	55/1831	0.664858	0.999326	0.999326	SP3/WNT7B/GNA12/VASH1/HOXD3/HEY2/KDM4C/IRX5/TMEM107/HOXB8/HOXA4/GORAB/POFUT1/FOXB1/HOXC6/APAF1/FZD1/PTPN18/SIN3A/FGF9/MMP16/YTHDC1/POGLUT1/SULF1/AKAP3/ANGPT1/RPL7L1/SPECC1	28
GO:0070887	cellular response to chemical stimulus	143/967	276/1831	0.665512	0.999326	0.999326	INSIG1/SRA1/IFNAR2/TBC1D24/SORBS1/RAD23B/RIN3/HRH1/GLDC/STAU2/ERLEC1/FAM210B/HGF/WNT7B/GAB1/ABCA7/RPTOR/TNFRSF13C/SEMA5A/METTL3/PTPRK/NPM1/ZNF236/SLC9B2/MAP2K6/TLR4/EEF1E1/YOD1/EPS8/BRAF/CPT1A/SOS1/PTGS1/UGGT1/BCL2/POR/SYK/ARID1B/ABCC4/SH3BP4/DNAJB14/TIAM1/KCNQ3/IP6K2/TOLLIP/ACTN2/VKORC1L1/XCR1/KDM6B/KDM4C/WDR35/PTPN1/THRA/STAT1/IRAK4/PTPRE/ADAM23/AQP9/ETV5/BECN1/EIF2AK2/UBE3A/ACE/ADRA2A/SYT6/DNA…	143
GO:0006873	intracellular monoatomic ion homeostasis	29/967	57/1831	0.667712	0.999326	0.999326	HTT/SLC24A1/SLC9A7/TESMIN/ATP1B2/BCL2/TTC7A/XCR1/JPH2/ATP6V1B2/THY1/UBE3A/ATP2C1/ATP4B/SLC24A4/PRKD1/STIM1/CCR5/SLC10A7/SLC4A7/HFE/MCOLN2/SLC11A1/ATP2A2/SLC45A2/ANKRD9/ISCU/APLNR/ATP2B4	29
GO:0009617	response to bacterium	29/967	57/1831	0.667712	0.999326	0.999326	TLR4/SYK/IDO1/IGHG3/FGF10/IRAK4/C4B/SLC22A5/ACE/FKBP5/ATP4B/SOD2/ERBIN/MAVS/PRKD1/FBXO3/THBD/MAP3K7/TIFAB/TMEM229B/ARG2/PTGFR/CCR5/JCHAIN/CARD8/H2BC6/SLC11A1/SYT11/GFI1	29
GO:0002682	regulation of immune system process	74/967	144/1831	0.671639	0.999326	0.999326	CTSC/IRF4/HK1/RIN3/SHB/FAM210B/TP53BP1/RPTOR/TNFRSF13C/METTL3/SEC14L1/YTHDF1/SLC9B2/MAP2K6/TLR4/BRAF/SOS1/BCL2/SYK/ING5/ARID1B/SHLD2/KHDRBS1/NECTIN2/IDO1/PTPN1/IGHG3/FGF10/HOXB8/STAT1/IRAK4/THY1/BRD1/C4B/TNFRSF13B/CD209/EIF2AK2/SMPDL3B/USP50/UBE2J1/MAPK10/STX7/CBLB/RIPOR2/GCNT1/NCR3/ERBIN/MAVS/PRKD1/MAP3K7/SIRT1/SH3RF1/SIN3A/TNFSF18/TNFRSF9/ARG2/ZFPM1/MITF/HFE/STK10/CAMK4/ITGB2/RC3H2/GCSAM/KAT6B/…	74
GO:0099537	trans-synaptic signaling	47/967	92/1831	0.673117	0.999326	0.999326	BDNF/FMR1/SLC24A1/TBC1D24/HRH1/STAU2/KMT2A/FCHSD1/YTHDF1/BRAF/SLC6A1/GJC1/ADARB1/GLRB/ADORA3/KCNQ3/ZDHHC2/GABRA2/UBE3A/ACE/ADRA2A/STXBP5/DLGAP2/DGKE/SLC6A6/SLC1A2/TMEM108/GABRR2/DNAJC5/HDAC6/PPFIA2/GRIN3A/DOC2B/IGSF11/AMPH/ATP2A2/CAMK2B/SYT11/AKAP9/MECP2/NETO1/KCNC4/LIN7A/PTPRA/KCTD13/STX2/SPG11	47
GO:0001501	skeletal system development	31/967	61/1831	0.673262	0.999326	0.999326	INSIG1/SP3/ANKRD11/WNT7B/SLC9B2/RAB33B/MAP2K6/HOXD3/WWOX/IRX5/TMEM107/THRA/HOXB8/MCPH1/HOXA4/ASXL1/PRELP/WDR48/MMP13/PTHLH/HOXC6/FMN1/TIFAB/HMGA2/SLC10A7/FGF9/MMP16/TIPARP/SULF1/TLL1/FRZB	31
GO:0002694	regulation of leukocyte activation	31/967	61/1831	0.673262	0.999326	0.999326	CTSC/IRF4/SHB/TP53BP1/TNFRSF13C/METTL3/TLR4/BRAF/SOS1/BCL2/SYK/ARID1B/SHLD2/NECTIN2/IDO1/FGF10/THY1/TNFRSF13B/CD209/CBLB/RIPOR2/SH3RF1/TNFSF18/TNFRSF9/ARG2/HFE/CAMK4/ITGB2/RC3H2/SYT11/STAT5B	31
[truncated: 837 more rows]
