# Supplementary material
Source: Research Square preprint supplement (doi:10.21203/rs.3.rs-9917999/v1)
Supplement: Supplementary file 3 [file 06bfebf416709f9ebab86ec5.xlsx]

## Sheet: Table S6.1
Table S6.1 GO enrichment analysis of genes associated with significant switched isoforms in fibroblasts.
ID	Description	GeneRatio	BgRatio	pvalue	p.adjust	qvalue	geneID	Count
GO:0006986	response to unfolded protein	8/138	137/18870	7.55127e-06	0.0166883	0.0154841	HERPUD2/CREB3L1/TMBIM6/WFS1/HSPH1/HSP90AA1/QRICH1/THBS1	8
GO:0035966	response to topologically incorrect protein	8/138	159/18870	2.23733e-05	0.0247225	0.0229385	HERPUD2/CREB3L1/TMBIM6/WFS1/HSPH1/HSP90AA1/QRICH1/THBS1	8

## Sheet: Table S6.2
Table S6.2 GO enrichment analysis of genes associated with significant switched isoforms in keratinocytes.
ID	Description	GeneRatio	BgRatio	pvalue	p.adjust	qvalue	geneID	Count
GO:0009185	ribonucleoside diphosphate metabolic process	6/182	30/18870	3.63107e-07	0.000978574	0.000889421	CMPK1/AK3/AK2/RRM1/RRM2/AK4	6
GO:0009132	nucleoside diphosphate metabolic process	6/182	37/18870	1.34422e-06	0.00181133	0.00164631	CMPK1/AK3/AK2/RRM1/RRM2/AK4	6
GO:0000380	alternative mRNA splicing, via spliceosome	7/182	71/18870	5.46702e-06	0.00376833	0.00342502	SFPQ/REST/NCBP1/SRSF1/RBM5/DHX9/STRAP	7
GO:0071453	cellular response to oxygen levels	10/182	174/18870	7.48802e-06	0.00403604	0.00366834	CCNA2/NPEPPS/HP1BP3/EPAS1/ZFP36L1/UBQLN1/CAV1/ATP6V1A/LMNA/AK4	10
GO:0044772	mitotic cell cycle phase transition	16/182	470/18870	1.35155e-05	0.00560265	0.00509222	GTSE1/TTK/NFIA/CCNI/CCNA2/DTL/CCND2/XPC/RRM1/CCND1/ZFP36L1/RRM2/VPS4A/PLK2/TFDP1/ZFP36L2	16
GO:0044000	movement in host	10/182	188/18870	1.4749e-05	0.00560265	0.00509222	EXOC2/NUP153/SCARB2/VPS4A/CAV1/SLC20A2/VAPA/ILF3/CXADR/CLDN1	10
GO:0008380	RNA splicing	16/182	478/18870	1.66312e-05	0.00560265	0.00509222	EFTUD2/HNRNPA3/GEMIN4/TCERG1/SFPQ/REST/KAT2A/NCBP1/SF3B1/SRSF1/MTREX/PRPF38B/RBM5/DHX9/STRAP/SYNCRIP	16
GO:0000377	RNA splicing, via transesterification reactions with bulged adenosine as nucleophile	13/182	332/18870	2.12061e-05	0.00571505	0.00519438	EFTUD2/HNRNPA3/GEMIN4/SFPQ/REST/NCBP1/SF3B1/SRSF1/MTREX/RBM5/DHX9/STRAP/SYNCRIP	13
GO:0000398	mRNA splicing, via spliceosome	13/182	332/18870	2.12061e-05	0.00571505	0.00519438	EFTUD2/HNRNPA3/GEMIN4/SFPQ/REST/NCBP1/SF3B1/SRSF1/MTREX/RBM5/DHX9/STRAP/SYNCRIP	13
GO:0000375	RNA splicing, via transesterification reactions	13/182	336/18870	2.40336e-05	0.00588823	0.00535178	EFTUD2/HNRNPA3/GEMIN4/SFPQ/REST/NCBP1/SF3B1/SRSF1/MTREX/RBM5/DHX9/STRAP/SYNCRIP	13
GO:0045732	positive regulation of protein catabolic process	10/182	210/18870	3.81549e-05	0.00817436	0.00742964	DTL/SOX9/CSNK1A1/RNF41/UBQLN1/CAV1/SNX9/CSNK2A1/PLK2/EZR	10
GO:0051701	biological process involved in interaction with host	10/182	211/18870	3.97232e-05	0.00817436	0.00742964	EXOC2/NUP153/SCARB2/VPS4A/CAV1/SLC20A2/VAPA/ILF3/CXADR/CLDN1	10
GO:1901990	regulation of mitotic cell cycle phase transition	13/182	355/18870	4.24642e-05	0.00817436	0.00742964	GTSE1/TTK/DTL/CCND2/XPC/RRM1/CCND1/ZFP36L1/RRM2/VPS4A/PLK2/TFDP1/ZFP36L2	13
GO:0016032	viral process	14/182	432/18870	8.04941e-05	0.0144621	0.0131445	NFIA/NUP153/SCARB2/CSNK1A1/REST/VPS4A/CAV1/SLC20A2/VAPA/ILF3/CXADR/CLDN1/DHX9/ADAR	14
GO:0071456	cellular response to hypoxia	8/182	147/18870	9.14698e-05	0.0151248	0.0137469	CCNA2/NPEPPS/HP1BP3/EPAS1/ZFP36L1/UBQLN1/LMNA/AK4	8
GO:0034470	ncRNA processing	14/182	439/18870	9.54069e-05	0.0151248	0.0137469	PNPT1/GEMIN4/UTP15/DDX52/AARS1/METTL2A/ALKBH8/RIOK1/DDX10/NCBP1/PUS3/DDX18/MTREX/ADAR	14
GO:0036294	cellular response to decreased oxygen levels	8/182	158/18870	0.000151009	0.0203485	0.0184947	CCNA2/NPEPPS/HP1BP3/EPAS1/ZFP36L1/UBQLN1/LMNA/AK4	8
GO:0044409	entry into host	8/182	163/18870	0.000187065	0.0229155	0.0208278	EXOC2/NUP153/SCARB2/CAV1/SLC20A2/ILF3/CXADR/CLDN1	8
GO:0045931	positive regulation of mitotic cell cycle	7/182	128/18870	0.000245161	0.0287264	0.0261093	DTL/PAFAH1B1/CCND2/RRM1/CCND1/RRM2/TFDP1	7
GO:0019058	viral life cycle	11/182	321/18870	0.00029472	0.0302066	0.0274547	NFIA/NUP153/SCARB2/VPS4A/CAV1/SLC20A2/VAPA/ILF3/CXADR/CLDN1/ADAR	11
GO:0044403	biological process involved in symbiotic interaction	11/182	322/18870	0.000302627	0.0302066	0.0274547	EXOC2/NUP153/SCARB2/REST/VPS4A/CAV1/SLC20A2/VAPA/ILF3/CXADR/CLDN1	11
GO:1901992	positive regulation of mitotic cell cycle phase transition	6/182	98/18870	0.000374419	0.035319	0.0321013	DTL/CCND2/RRM1/CCND1/RRM2/TFDP1	6
GO:0051607	defense response to virus	11/182	334/18870	0.000412343	0.0367587	0.0334098	RNF216/UBE2N/IFIT3/CSNK1A1/NCBP1/UBQLN1/ZMYND11/ILF3/DHX9/ADAR/AZI2	11
GO:0140546	defense response to symbiont	11/182	335/18870	0.000422827	0.0367587	0.0334098	RNF216/UBE2N/IFIT3/CSNK1A1/NCBP1/UBQLN1/ZMYND11/ILF3/DHX9/ADAR/AZI2	11
GO:0007093	mitotic cell cycle checkpoint signaling	7/182	142/18870	0.000460593	0.0387905	0.0352566	GTSE1/TTK/DTL/XPC/CCND1/VPS4A/PLK2	7
GO:1901987	regulation of cell cycle phase transition	13/182	456/18870	0.000498207	0.0406869	0.0369801	GTSE1/TTK/DTL/CCND2/XPC/RRM1/CCND1/ZFP36L1/RRM2/VPS4A/PLK2/TFDP1/ZFP36L2	13
GO:0070482	response to oxygen levels	11/182	343/18870	0.000515036	0.0408242	0.0371049	CCNA2/NPEPPS/HP1BP3/REST/EPAS1/ZFP36L1/UBQLN1/CAV1/ATP6V1A/LMNA/AK4	11
GO:1901991	negative regulation of mitotic cell cycle phase transition	8/182	196/18870	0.000644009	0.0474887	0.0431623	GTSE1/TTK/DTL/CCND1/ZFP36L1/VPS4A/PLK2/ZFP36L2	8
GO:0001666	response to hypoxia	10/182	298/18870	0.000651979	0.0474887	0.0431623	CCNA2/NPEPPS/HP1BP3/REST/EPAS1/ZFP36L1/UBQLN1/CAV1/LMNA/AK4	10
GO:0045930	negative regulation of mitotic cell cycle	9/182	248/18870	0.00069687	0.0494228	0.0449201	GTSE1/TTK/DTL/XPC/CCND1/ZFP36L1/VPS4A/PLK2/ZFP36L2	9
