# Supplementary material
Source: Research Square preprint supplement (doi:10.21203/rs.3.rs-9917999/v1)
Supplement: Supplementary file 4 [file 07e7c19f4d83cdf420b3e63c.xlsx]

## Sheet: Table S3.1
Table S3.1 Differential isoform expression in fibroblasts at post-wound day 7 compared with normal skin.
isoform	associated_gene	SYMBOL	associated_transcript	structural_category	baseMean	log2FoldChange	lfcSE	stat	pvalue	padj	Type_FC_2	isoforms	geneConditions	mean_counts_SF	mean_counts_WF	mean_tpm_SF	mean_tpm_WF	SF-1_tpm	SF-2_tpm	SF-3_tpm	SF-4_tpm	SF-5_tpm	WF-1_tpm	WF-2_tpm	WF-3_tpm	WF-4_tpm	WF-5_tpm
PB.1388.1	ENSG00000081760	AACS	ENST00000316519	FSM	682.981	-0.282199	0.165269	-1.70751	0.0877276	0.179301	Not	AACS-PB.1388.1-Anno	Annotated	735	625	49.9294	41.5126	51.3821	69.5841	50.6403	39.8948	38.1459	47.3589	41.6524	39.1001	36.7142	42.7374
PB.2741.1	ENSG00000115977	AAK1	novel	NNC	2012.12	0.377455	0.070145	5.38107	7.4045e-08	8.1391e-07	Not	AAK1-PB.2741.1-novel	novel	1702.11	2342.09	69.4336	92.9477	78.0602	65.9753	69.8853	66.1462	67.1011	91.0822	84.2784	100.257	95.6507	93.4702
PB.2027.1	ENSG00000090861	AARS1	ENST00000261772	FSM	544.481	0.780816	0.159326	4.90076	9.54687e-07	8.3424e-06	Not	AARS-PB.2027.1-Anno	Annotated	390.014	708.941	24.9503	44.3604	21.4731	27.2884	25.635	30.7808	19.5744	42.2659	57.1047	48.9954	40.2459	33.1901
PB.2027.2	ENSG00000090861	AARS1	ENST00000261772	FSM	443.969	-0.330075	0.311003	-1.06133	0.288542	0.444457	Not	AARS-PB.2027.2-Anno	Annotated	486.586	404.459	32.7535	26.3033	33.6957	31.4091	48.9542	14.071	35.6376	22.3915	14.1081	29.5501	29.4166	36.05
PB.4258.1	ENSG00000124608	AARS2	ENST00000244571	FSM	394.543	-0.0696191	0.185361	-0.375586	0.707225	0.820215	Not	AARS2-PB.4258.1-Anno	Annotated	395.415	393.539	23.147	22.3381	31.2063	17.0757	28.9608	16.815	21.6771	28.7741	19.3735	18.1037	24.521	20.9181
PB.1023.1	ENSG00000149313	AASDHPPT	ENST00000278618	FSM	537.903	0.228612	0.102533	2.22965	0.0257708	0.0672539	Not	AASDHPPT-PB.1023.1-Anno	Annotated	483.4	598.2	42.5514	50.965	49.6596	42.0121	51.3517	33.9666	35.7669	50.4725	54.4956	54.8264	52.6936	42.3366
PB.4634.1	ENSG00000008311	AASS	ENST00000417368	FSM	1177.9	-0.775912	0.151211	-5.13133	2.87708e-07	2.79931e-06	Not	AASS-PB.4634.1-Anno	Annotated	1447.76	890.639	69.9634	41.8921	75.0601	52.3105	81.0853	71.1437	70.2173	39.2084	47.6457	36.5821	44.0257	41.9986
PB.5052.1	ENSG00000165029	ABCA1	novel	NIC	464.157	-0.0448552	0.104432	-0.429516	0.667548	0.787478	Not	ABCA1-PB.5052.1-novel	novel	457.861	468.983	57.748	57.686	60.171	54.0241	56.361	64.9325	53.2515	62.8489	53.4245	55.85	60.4726	55.8339
PB.2274.1	ENSG00000154262	ABCA6	ENST00000284425	FSM	2569.76	-2.00858	0.282187	-7.11793	1.09562e-12	2.35644e-11	Down	ABCA6-PB.2274.1-Anno	Annotated	3979.6	1081.6	162.854	43.3577	136.656	92.6481	208.168	166.523	210.278	23.3942	47.9527	33.4425	75.325	36.674
PB.2964.1	ENSG00000115657	ABCB6	ENST00000265316	FSM	278.908	-0.387593	0.139271	-2.78301	0.0053857	0.0178845	Not	ABCB6-PB.2964.1-Anno	Annotated	310.6	248.2	23.6157	18.2246	27.0427	20.1831	32.3735	16.8289	21.6502	19.6873	17.7416	20.0151	16.8813	16.7976
PB.5321.1	ENSG00000131269	ABCB7	ENST00000253577	FSM	339.435	0.0679617	0.124423	0.546215	0.584918	0.718555	Not	ABCB7-PB.5321.1-Anno	Annotated	321.8	359.8	33.8924	36.7656	34.5374	30.9479	34.2322	34.1342	35.6104	34.1817	33.4978	44.5039	35.6352	36.0095
PB.1496.2	ENSG00000125257	ABCC4	ENST00000645237	ISM	28.9412	-7.803	2.25621	-3.45845	0.000543285	0.00247489	Down	ABCC4-PB.1496.2-Anno	Annotated	56.9771	0	3.43976	0	6.80814	2.44291	4.83429	3.11345	2.44833e-05	0	0	0	0	0
PB.1496.1	ENSG00000125257	ABCC4	ENST00000645237	FSM	608.247	2.06977	0.168543	12.2803	1.15521e-34	1.6378e-32	Up	ABCC4-PB.1496.1-Anno	Annotated	227.223	1035.6	8.45991	37.2687	5.86379	6.28307	12.1421	8.14118	9.86941	32.8637	24.6995	62.272	28.7632	37.7453
PB.3624.1	ENSG00000114770	ABCC5	ENST00000427120	FSM	410.638	-0.667954	0.17275	-3.86659	0.000110369	0.00060468	Not	ABCC5-PB.3624.1-Anno	Annotated	491.4	324.6	22.8361	14.6177	31.2535	22.9756	21.2711	20.1094	18.5708	12.8285	13.7675	14.885	16.597	15.0102
PB.5388.1	ENSG00000101986	ABCD1	ENST00000218104	FSM	183.362	-0.654953	0.275044	-2.38127	0.0172533	0.0483301	Not	ABCD1-PB.5388.1-Anno	Annotated	217.6	147.4	13.3977	8.74718	19.2299	9.93292	14.1096	10.4628	13.2531	8.87814	11.3415	8.62007	9.41183	5.48434
PB.245.1	ENSG00000117528	ABCD3	ENST00000370214	FSM	912.807	-0.0144488	0.127772	-0.113083	0.909965	0.94556	Not	ABCD3-PB.245.1-Anno	Annotated	894.4	931.6	58.4767	59.1581	70.8576	59.9451	64.3318	47.0828	50.1664	59.1266	53.8012	57.0961	65.1329	60.6335
PB.3851.3	ENSG00000164163	ABCE1	ENST00000296577	FSM	264.701	2.20848	0.905975	2.43768	0.0147819	0.0424162	Up	ABCE1-PB.3851.3-Anno	Annotated	171.069	367.576	11.0068	22.7166	9.27188	0.450764	20.4254	0.272724	24.6133	22.8662	20.6158	25.3207	32.8096	11.9705
PB.3851.1	ENSG00000164163	ABCE1	ENST00000296577	FSM	440.482	0.528145	0.308534	1.71179	0.0869352	0.177981	Not	ABCE1-PB.3851.1-Anno	Annotated	343.914	554.597	20.8637	32.6899	18.1177	25.0743	22.9797	22.2484	15.8984	35.7968	17.7356	54.3119	23.9006	31.7049
PB.3851.2	ENSG00000164163	ABCE1	ENST00000296577	FSM	553.25	1.14731	0.334567	3.42925	0.000605253	0.00272501	Not	ABCE1-PB.3851.2-Anno	Annotated	336.324	783.792	22.4423	50.929	26.046	30.6957	16.7342	25.1757	13.5597	48.9778	40.3533	58.4493	35.3688	71.4959
PB.3851.4	ENSG00000164163	ABCE1	ENST00000296577	FSM	91.916	0.951797	0.611853	1.5556	0.119804	0.228962	Not	ABCE1-PB.3851.4-Anno	Annotated	65.2925	120.435	3.6881	6.67153	1.48611	1.76429	3.4665	4.71371	7.00991	8.18926	9.09514	8.1673	3.77628	4.12965
PB.4692.1	ENSG00000033050	ABCF2	ENST00000287844	FSM	1482.21	0.223474	0.088974	2.51167	0.012016	0.0355819	Not	ABCF2-PB.4692.1-Anno	Annotated	1331.82	1647.37	84.4028	101.31	97.8248	88.1213	86.795	69.0752	80.1979	108.202	92.559	114.767	96.6374	94.3829
PB.3477.1	ENSG00000144827	ABHD10	ENST00000497293	FSM	84.4817	-0.255035	0.330916	-0.770695	0.440888	0.595436	Not	ABHD10-PB.3477.1-Anno	Annotated	90	78.6	6.45809	5.54187	4.74806	6.48999	8.75403	5.74235	6.556	6.82754	5.25384	4.80756	6.07927	4.74115
PB.3050.1	ENSG00000100997	ABHD12	novel	NIC	173.321	-0.257668	0.262288	-0.982388	0.325909	0.483883	Not	ABHD12-PB.3050.1-novel	novel	182.044	163.082	20.7525	18.1105	21.6746	19.3517	26.0546	16.9328	19.7488	16.6829	15.7196	12.8553	22.5266	22.768
PB.1519.1	ENSG00000139826	ABHD13	ENST00000375898	FSM	470.954	-0.172741	0.104666	-1.6504	0.0988613	0.196901	Not	ABHD13-PB.1519.1-Anno	Annotated	485.8	455.2	27.9485	25.503	27.1231	25.2185	31.9563	26.1197	29.3249	24.7674	27.4116	25.3291	24.6405	25.3661
PB.1863.1	ENSG00000140526	ABHD2	ENST00000352732	FSM	1999.97	0.116335	0.113328	1.02653	0.304643	0.462388	Not	ABHD2-PB.1863.1-Anno	Annotated	1884.6	2138.4	139.272	153.011	157.585	123.111	191.432	123.956	100.277	169.448	168.093	163.393	142.68	121.44
PB.2341.1	ENSG00000158201	ABHD3	ENST00000579982	FSM	433.208	-0.285066	0.191562	-1.48811	0.136721	0.253146	Not	ABHD3-PB.2341.1-Anno	Annotated	461.419	402.099	63.3402	53.7366	70.7658	46.5958	79.9648	63.1069	56.2678	72.6766	45.5987	40.5254	57.4791	52.4035
PB.3371.1	ENSG00000011198	ABHD5	ENST00000644371	FSM	961.7	-0.53807	0.184054	-2.92343	0.00346194	0.0123209	Not	ABHD5-PB.3371.1-Anno	Annotated	1121.6	784.6	110.358	75.6932	100.258	174.67	96.0227	88.0332	92.8068	68.694	75.1317	73.8255	80.2749	80.54
PB.594.2	ENSG00000136754	ABI1	ENST00000376139	FSM	287.089	-0.380248	0.536323	-0.708991	0.47833	0.627803	Not	ABI1-PB.594.2-Anno	Annotated	328.932	237.522	23.7911	16.9573	16.1875	42.9533	5.52038	30.2485	24.0457	16.951	20.8448	20.1617	6.26816	20.5611
PB.594.3	ENSG00000136754	ABI1	ENST00000376139	FSM	741.01	0.204707	0.263857	0.775826	0.437852	0.592709	Not	ABI1-PB.594.3-Anno	Annotated	703.449	784.202	70.7624	77.5117	47.5542	131.2	74.1891	46.9329	53.9362	80.4088	70.5521	95.5113	71.545	69.5415
PB.594.4	ENSG00000136754	ABI1	ENST00000359188	FSM	573.061	-0.928524	0.160656	-5.77959	7.48827e-09	9.90877e-08	Not	ABI1-PB.594.4-Anno	Annotated	728.881	405.956	72.9332	39.298	90.9059	68.5305	60.723	76.4332	68.0734	34.7582	43.1182	44.1487	37.2829	37.1818
PB.594.5	ENSG00000136754	ABI1	novel	NIC	430.681	0.0309267	0.228219	0.135513	0.892206	0.934724	Not	ABI1-PB.594.5-novel	novel	426.604	426.923	45.8878	44.896	61.2931	74.3018	24.0758	32.611	37.1574	48.8905	48.3147	35.4682	51.5677	40.2387
PB.2941.1	ENSG00000138443	ABI2	ENST00000261017	FSM	1716.17	-0.342853	0.0906235	-3.78327	0.000154782	0.000817694	Not	ABI2-PB.2941.1-Anno	Annotated	1874.44	1558.34	102.164	82.2157	128.664	85.6385	114.48	98.7827	83.2577	79.8887	79.0102	92.0061	87.9619	72.2119
PB.4132.4	ENSG00000173210	ABLIM3	novel	NIC	335.471	-0.263582	0.171299	-1.53873	0.123871	0.235118	Not	ABLIM3-PB.4132.4-novel	novel	355.609	312.79	35.3572	30.185	41.6004	29.8201	41.8691	29.7552	33.7413	30.8308	30.5392	24.1778	33.5458	31.8312
PB.1342.1	ENSG00000111271	ACAD10	ENST00000313698	FSM	212.688	0.0445571	0.165276	0.269592	0.787474	0.874138	Not	ACAD10-PB.1342.1-Anno	Annotated	204.4	222.8	11.4576	12.1224	13.974	10.3005	14.4948	9.09575	9.42272	14.4839	10.3226	12.762	13.7634	9.28021
PB.3531.1	ENSG00000240303	ACAD11	ENST00000264990	FSM	383.975	-0.368805	0.168921	-2.1833	0.0290137	0.0742934	Not	ACAD11-PB.3531.1-Anno	Annotated	424.433	341.354	29.4871	23.0178	37.1266	19.3892	30.0112	37.8823	23.0261	19.6994	20.7249	24.2909	29.0331	21.3409
PB.3531.2	ENSG00000240303	ACAD11	ENST00000264990	FSM	315.509	-0.60795	0.248309	-2.44836	0.0143508	0.0414531	Not	ACAD11-PB.3531.2-Anno	Annotated	378.57	251.269	29.2033	18.8619	20.8393	19.9433	43.8549	24.4679	36.9113	18.357	20.9151	19.5294	18.9062	16.6016
PB.3520.1	ENSG00000177646	ACAD9	ENST00000511227	FSM	404.935	0.300279	0.177319	1.69344	0.0903722	0.183629	Not	ACAD9-PB.3520.1-Anno	Annotated	357	457	30.9608	38.5808	29.4994	36.8318	39.1535	21.7924	27.527	38.1467	34.5896	39.9197	39.7499	40.4979
PB.2097.1	ENSG00000072778	ACADVL	novel	NIC	2387.4	0.137642	0.0635696	2.16521	0.0303715	0.0769235	Not	ACADVL-PB.2097.1-novel	novel	2215.4	2576.2	173.816	195.344	223.165	149.614	181.358	147.398	167.544	212.105	181.412	210.726	181.155	191.323
PB.3647.1	ENSG00000114331	ACAP2	ENST00000326793	FSM	1482.78	-0.220761	0.141035	-1.56529	0.117515	0.225857	Not	ACAP2-PB.3647.1-Anno	Annotated	1547.3	1422.45	98.4043	87.8844	92.2085	100.426	103.714	107.619	88.0539	70.9521	93.7574	108.777	73.8065	92.1288
PB.3647.2	ENSG00000114331	ACAP2	ENST00000326793	FSM	38.1043	-2.10688	2.33168	-0.903591	0.366213	0.524336	Not	ACAP2-PB.3647.2-Anno	Annotated	11.433	63.9949	0.766538	4.53	0.0295012	2.61635	0.791203	0.336848	0.0587871	11.4172	2.61462e-09	9.8467e-07	11.2328	3.78279e-07
PB.4419.1	ENSG00000120437	ACAT2	ENST00000367048	ISM	326.894	-0.232516	0.171228	-1.35793	0.174485	0.306021	Not	ACAT2-PB.4419.1-Anno	Annotated	344.658	308.768	30.5305	26.4091	41.9598	26.9985	30.34	30.1786	23.1757	25.3778	22.7992	28.9138	27.145	27.8097
PB.600.1	ENSG00000107897	ACBD5	ENST00000396271	FSM	934.513	-0.232621	0.0826163	-2.81568	0.00486736	0.0164005	Not	ACBD5-PB.600.1-Anno	Annotated	980.224	882.962	55.6394	48.8636	59.6666	52.384	58.2413	53.4245	54.4808	52.4271	45.6587	45.945	47.4079	52.8793
PB.418.1	ENSG00000230124	ACBD6	ENST00000367595	FSM	309.545	0.127653	0.143394	0.890225	0.373345	0.531155	Not	ACBD6-PB.418.1-Anno	Annotated	289	332	34.306	38.0951	42.2167	28.9112	42.0294	31.014	27.3588	41.6757	34.8444	37.3918	37.6886	38.8751
PB.994.1	ENSG00000078124	ACER3	ENST00000532485	FSM	873.031	-0.0363352	0.142038	-0.255812	0.798096	0.879221	Not	ACER3-PB.994.1-Anno	Annotated	863.703	883.841	56.4576	56.2164	63.1077	50.5982	52.8099	71.753	44.0192	49.7739	56.8848	64.3602	59.4114	50.6519
PB.1540.1	ENSG00000100813	ACIN1	ENST00000457657	FSM	2276.96	0.297519	0.101538	2.93014	0.00338814	0.0121327	Not	ACIN1-PB.1540.1-Anno	Annotated	1995.1	2577.62	101.79	128.25	105.14	114.924	113.624	82.8473	92.4159	135.917	124.214	132.512	132.904	115.704
PB.1540.2	ENSG00000100813	ACIN1	ENST00000605057	ISM	299.925	-1.11736	0.271186	-4.12028	3.78411e-05	0.000232228	Not	ACIN1-PB.1540.2-Anno	Annotated	397.613	194.656	26.0812	12.4922	28.304	16.5935	30.6126	27.3495	27.5461	16.6302	14.0367	7.93586	13.2266	10.6315
PB.1540.3	ENSG00000100813	ACIN1	ENST00000457657	ISM	17.983	0.201415	0.589383	0.341739	0.732547	0.840682	Not	ACIN1-PB.1540.3-Anno	Annotated	16.9725	18.771	1.18146	1.24056	2.86704	0.539642	0.615188	0.737296	1.14812	2.11477	0.545773	1.26381	1.06584	1.21262
PB.3533.1	ENSG00000129048	ACKR4	ENST00000249887	FSM	588.819	-0.89156	0.306672	-2.90721	0.00364669	0.0129083	Not	ACKR4-PB.3533.1-Anno	Annotated	758.6	414.6	95.7946	50.2803	116.155	34.7496	115.063	115.662	97.3439	42.8679	54.3786	63.5388	51.8628	38.7533
PB.2179.1	ENSG00000131473	ACLY	ENST00000353196	ISM	462.242	1.56937	0.332517	4.71965	2.36245e-06	1.93537e-05	Not	ACLY-PB.2179.1-Anno	Annotated	230.303	719.433	13.5307	41.2389	9.53722	11.1239	14.4118	21.3917	11.189	41.0255	29.1864	61.7985	25.6098	48.5744
PB.2179.2	ENSG00000131473	ACLY	ENST00000393896	FSM	846.745	0.326287	0.182504	1.78783	0.0738031	0.156219	Not	ACLY-PB.2179.2-Anno	Annotated	746.918	955.295	39.095	48.2372	53.5724	40.7735	43.2385	19.2401	38.6507	52.3511	48.0856	50.6453	46.1193	43.9848
PB.2179.3	ENSG00000131473	ACLY	ENST00000352035	FSM	1061.84	0.976172	0.15618	6.25031	4.09647e-10	6.35228e-09	Not	ACLY-PB.2179.3-Anno	Annotated	700.925	1467.65	35.844	73.1743	24.2393	32.5591	45.2046	46.1469	31.0699	54.8322	53.4168	109.193	76.141	72.2887
PB.2179.4	ENSG00000131473	ACLY	ENST00000352035	FSM	311.424	-0.0393031	1.39901	-0.0280935	0.977588	0.987251	Not	ACLY-PB.2179.4-Anno	Annotated	307.254	312.621	19.3389	18.9563	37.4334	18.7723	20.3534	0.0371509	20.0985	47.3569	29.102	9.76376	8.52622	0.0325451
PB.4963.1	ENSG00000122729	ACO1	ENST00000309951	FSM	417.005	-0.347658	0.166484	-2.08824	0.036776	0.0897691	Not	ACO1-PB.4963.1-Anno	Annotated	452.193	385.57	21.7074	17.867	24.2425	18.2898	24.8577	21.5281	19.6191	18.8463	15.9362	25.0005	12.7441	16.8081
PB.4963.2	ENSG00000122729	ACO1	ENST00000309951	FSM	625.672	2.52266	1.22235	2.06379	0.0390378	0.094329	Not	ACO1-PB.4963.2-Anno	Annotated	299.287	987.006	18.8369	60.8052	3.4339e-07	28.1504	43.6675	5.64287	16.7236	43.7037	50.8194	80.6109	57.8251	71.0668
PB.4963.3	ENSG00000122729	ACO1	ENST00000309951	FSM	351.548	-0.598934	0.669951	-0.893998	0.371323	0.529362	Not	ACO1-PB.4963.3-Anno	Annotated	393.227	306.4	25.9527	19.5927	36.5175	13.9745	12.3543	35.1664	31.7508	24.0349	26.1348	25.6361	20.8788	1.2789
PB.4963.4	ENSG00000122729	ACO1	ENST00000379923	ISM	8.10976	-0.953102	3.10067	-0.307386	0.75855	0.860201	Not	ACO1-PB.4963.4-Anno	Annotated	15.7981	0.00675243	1.19202	0.000424114	5.96008	1.76592e-06	0	1.66494e-07	0	0	0	0.00212057	0	0
PB.2286.2	ENSG00000161533	ACOX1	ENST00000293217	FSM	437.924	0.120094	0.237758	0.505108	0.613483	0.742485	Not	ACOX1-PB.2286.2-Anno	Annotated	406.716	468.705	27.9616	31.4434	26.8123	38.5018	20.5721	27.5003	26.4213	27.2275	31.6563	34.6818	21.8051	41.8461
PB.2611.1	ENSG00000143727	ACP1	ENST00000439645	FSM	295.44	-0.0414947	0.111554	-0.371969	0.709916	0.822354	Not	ACP1-PB.2611.1-Anno	Annotated	291.79	299.326	32.0353	31.7619	41.8628	26.9133	34.3026	28.8164	28.2813	35.74	28.7201	31.7078	31.2702	31.3714
PB.2063.1	ENSG00000176715	ACSF3	ENST00000614302	FSM	150.048	0.0310538	0.265829	0.116819	0.907003	0.944087	Not	ACSF3-PB.2063.1-Anno	Annotated	147	155.2	14.1889	14.3365	20.514	8.19082	19.0149	10.0814	13.1435	15.9466	14.5607	16.6953	14.5699	9.91003
PB.3892.1	ENSG00000151726	ACSL1	ENST00000281455	FSM	1663.68	0.412197	0.215481	1.91292	0.0557585	0.125155	Not	ACSL1-PB.3892.1-Anno	Annotated	1417.2	1922.4	83.6467	110.626	92.3112	111.71	72.3404	44.3152	97.5568	141.406	93.4338	118.229	97.695	102.367
PB.2974.2	ENSG00000123983	ACSL3	ENST00000680251	FSM	31.0717	-6.67136	1.77729	-3.75368	0.00017426	0.000903423	Down	ACSL3-PB.2974.2-Anno	Annotated	58.4332	0.387467	3.24686	0.0211526	1.41597	3.77858	0	3.97795	7.0618	0	0.103181	0	0.00037926	0.00220287
PB.2974.8	ENSG00000123983	ACSL3	ENST00000357430	FSM	71.1266	-3.85698	1.35261	-2.85151	0.0043512	0.0149052	Down	ACSL3-PB.2974.8-Anno	Annotated	115.243	22.6894	8.61508	1.57009	31.4055	5.48315	0.00663995	3.69344	2.48666	1.48528	0.00580324	0.0254043	0.0881428	6.24584
PB.2974.4	ENSG00000123983	ACSL3	ENST00000392066	FSM	90.5295	-0.333571	2.98741	-0.111659	0.911094	0.945832	Not	ACSL3-PB.2974.4-Anno	Annotated	94.5677	81.545	5.33009	4.40435	11.5174	15.1152	0	0.00485079	0.0130225	1.45244e-08	9.8934	0.000112756	3.44858e-09	12.1282
PB.2974.5	ENSG00000123983	ACSL3	ENST00000392066	FSM	34.4991	-2.98656	2.45215	-1.21793	0.223249	0.368295	Not	ACSL3-PB.2974.5-Anno	Annotated	64.5159	0.73816	4.57693	0.0517653	0.00177583	10.0466	0	0.0504164	12.7859	1.1726e-07	0.257523	0.000141135	0	0.00116208
PB.2974.6	ENSG00000123983	ACSL3	ENST00000357430	FSM	564.989	0.887505	0.170566	5.20331	1.95773e-07	1.99419e-06	Not	ACSL3-PB.2974.6-Anno	Annotated	384.518	758.334	20.8931	40.2281	20.9642	22.4501	19.2016	19.3196	22.5302	41.6538	38.3108	46.7817	45.1059	29.2881
PB.2974.7	ENSG00000123983	ACSL3	ENST00000357430	FSM	140.043	-3.25375	2.36527	-1.37564	0.168934	0.298817	Not	ACSL3-PB.2974.7-Anno	Annotated	157.516	128.394	10.9914	8.87087	0.00101333	9.93169	19.7195	17.3022	8.00268	22.0341	0.00127603	19.5703	2.7422	0.00652377
PB.2974.9	ENSG00000123983	ACSL3	ENST00000680684	FSM	580.788	0.267353	0.2084	1.28288	0.199534	0.338171	Not	ACSL3-PB.2974.9-Anno	Annotated	518.166	637.144	39.3548	47.7742	33.1302	63.841	30.8741	39.7211	29.2078	36.6704	51.1231	36.3639	56.1366	58.5772
PB.2974.3	ENSG00000123983	ACSL3	ENST00000392066	FSM	130.373	3.68242	1.10066	3.34566	0.00082088	0.00355527	Up	ACSL3-PB.2974.3-Anno	Annotated	50.4393	222.457	3.63144	15.5806	1.83591e-06	0.34119	8.16852	8.92469	0.722779	14.1965	22.0858	29.3022	3.16025	9.15824
PB.2974.1	ENSG00000123983	ACSL3	ENST00000680251	FSM	24.0278	7.90465	1.56514	5.05046	4.40752e-07	4.09893e-06	Up	ACSL3-PB.2974.1-Anno	Annotated	5.38843e-05	48.9099	3.93055e-06	3.51863	0	0	0	0	1.96528e-05	1.87103	3.4472	2.75705	4.93465	4.58322
PB.5350.1	ENSG00000068366	ACSL4	ENST00000672401	FSM	1575.83	1.50643	0.241383	6.24082	4.35293e-10	6.70506e-09	Not	ACSL4-PB.5350.1-Anno	Annotated	793.951	2456.18	35.4732	105.7	33.0942	19.8544	36.6582	43.0072	44.7518	84.5376	79.6987	176.924	73.2257	114.116
PB.5350.2	ENSG00000068366	ACSL4	ENST00000672282	FSM	1030.79	1.48053	0.256471	5.77268	7.80207e-09	1.02459e-07	Not	ACSL4-PB.5350.2-Anno	Annotated	521.048	1603.22	23.425	69.8282	25.7644	28.9972	19.6654	25.1322	17.5658	64.9146	51.9232	116.721	61.713	53.8691
PB.3048.1	ENSG00000154930	ACSS1	ENST00000323482	FSM	271.414	-0.900527	0.204191	-4.41022	1.03264e-05	7.34264e-05	Not	ACSS1-PB.3048.1-Anno	Annotated	343.4	194	21.1086	11.5555	27.3772	15.9009	18.9261	23.1193	20.2193	8.79679	12.102	11.1775	13.3158	12.3853
PB.3071.1	ENSG00000131069	ACSS2	ENST00000360596	FSM	486.018	-0.547382	0.187985	-2.91184	0.00359312	0.0127289	Not	ACSS2-PB.3071.1-Anno	Annotated	561.6	405.6	44.0448	30.8611	53.3052	45.0116	52.7797	31.4279	37.6997	28.5081	36.49	26.6624	37.0051	25.6398
PB.3612.1	ENSG00000136518	ACTL6A	ENST00000491202	FSM	339.792	0.303409	0.126378	2.4008	0.0163592	0.0461793	Not	ACTL6A-PB.3612.1-Anno	Annotated	297.832	387.394	44.5263	55.6816	54.7789	31.2611	55.6663	34.9108	46.0142	58.8475	45.4301	64.7947	57.8398	51.4959
PB.1635.1	ENSG00000072110	ACTN1	ENST00000193403	FSM	1406.26	1.23182	0.172306	7.14901	8.74085e-13	1.91554e-11	Not	ACTN1-PB.1635.1-Anno	Annotated	809.239	2059.7	49.4515	121.263	62.1735	47.8344	48.1873	45.5918	43.4707	113.959	109.381	162.523	88.7258	131.727
PB.1635.11	ENSG00000072110	ACTN1	ENST00000193403	FSM	13.4051	1.73401	2.65908	0.65211	0.51433	0.660087	Not	ACTN1-PB.1635.11-Anno	Annotated	0.580511	26.2675	0.0417992	1.94606	4.83436e-08	0.00774682	0.116241	0.0772512	0.00775676	9.31889	0.162115	0.000218406	0.248482	0.000606668
PB.1635.12	ENSG00000072110	ACTN1	ENST00000683261	FSM	745.426	0.191203	0.144116	1.32673	0.184599	0.319245	Not	ACTN1-PB.1635.12-Anno	Annotated	675.713	813.795	68.3173	79.5701	90.4145	51.6818	73.0286	57.6946	68.767	87.2645	80.1978	62.3625	77.055	90.9707
PB.1635.2	ENSG00000072110	ACTN1	ENST00000438964	FSM	1410.99	0.782307	0.179769	4.35173	1.35065e-05	9.25343e-05	Not	ACTN1-PB.1635.2-Anno	Annotated	1017.62	1812.63	65.3455	113.556	77.9755	78.4294	40.1593	66.0522	64.1113	109.683	112.797	107.392	101.221	136.687
PB.1635.4	ENSG00000072110	ACTN1	ENST00000193403	FSM	1119.33	1.89689	0.870443	2.17922	0.029315	0.074707	Not	ACTN1-PB.1635.4-Anno	Annotated	639.188	1648.22	41.7663	103.493	47.2194	1.43395	40.8608	24.03	95.2876	109.918	84.1845	144.27	135.069	44.0228
PB.1635.5	ENSG00000072110	ACTN1	ENST00000193403	FSM	106.532	-1.27541	0.784955	-1.62481	0.104202	0.204895	Not	ACTN1-PB.1635.5-Anno	Annotated	101.193	107.958	7.57559	7.81622	25.0913	3.0032	0.464126	8.27265	1.04669	32.0292	4.80256	0.155617	2.09366	8.36503e-05
PB.1635.6	ENSG00000072110	ACTN1	ENST00000438964	FSM	16.8565	-2.71933	3.06565	-0.887032	0.375062	0.532724	Not	ACTN1-PB.1635.6-Anno	Annotated	32.7492	0.000448676	2.60124	3.31238e-05	12.727	2.89043e-08	0.000937718	0.127918	0.150359	0.00012112	5.09678e-07	7.41061e-08	4.38738e-05	4.14203e-08
PB.1635.7	ENSG00000072110	ACTN1	ENST00000193403	FSM	0.0950652	-0.632094	3.15782	-0.200168	0.841349	0.902486	Not	ACTN1-PB.1635.7-Anno	Annotated	0.22824	0.00537386	0.0169047	0.000391547	0.00611112	0.000347286	0.0780287	2.84706e-05	7.73235e-06	0.000160718	0.000244087	1.0764e-06	0.00155139	4.64424e-07
PB.1635.8	ENSG00000072110	ACTN1	novel	NIC	592.348	0.87001	0.157581	5.52104	3.36995e-08	3.97471e-07	Not	ACTN1-PB.1635.8-novel	novel	409.755	790.408	30.1132	56.4048	30.2469	25.2308	33.2649	24.1483	37.6753	61.2976	49.5737	66.3822	57.5161	47.2543
PB.1635.9	ENSG00000072110	ACTN1	ENST00000193403	FSM	397.221	-0.676848	1.28524	-0.52663	0.598451	0.729119	Not	ACTN1-PB.1635.9-Anno	Annotated	420.082	371.755	32.1544	27.5871	32.7171	69.6308	16.0505	11.1396	31.2338	25.3859	65.1937	37.4329	9.92054	0.00236971
PB.1635.3	ENSG00000072110	ACTN1	ENST00000193403	FSM	906.635	2.89166	0.857762	3.37116	0.000748512	0.00327657	Up	ACTN1-PB.1635.3-Anno	Annotated	250.967	1611.01	17.0794	106.601	25.3095	34.6438	3.97521	18.2295	3.23895	66.8146	51.2763	138.848	86.6677	189.396
PB.2535.3	ENSG00000130402	ACTN4	ENST00000252699	FSM	246.901	-25.9052	3.13241	-8.27006	1.33889e-16	4.30615e-15	Down	ACTN4-PB.2535.3-Anno	Annotated	481.494	0.0170631	33.6415	0.00110789	168.206	0.000868711	1.72501e-05	6.19063e-07	0.000599948	0.00553879	0	1.42208e-07	5.03324e-07	0
PB.2535.4	ENSG00000130402	ACTN4	ENST00000252699	FSM	1365.91	-0.12417	0.665724	-0.186519	0.852038	0.908953	Not	ACTN4-PB.2535.4-Anno	Annotated	1516.37	1216.38	93.6125	74.3994	13.3535	139.137	110.467	60.7611	144.344	85.6325	51.3894	101.521	77.9212	55.533
PB.2535.5	ENSG00000130402	ACTN4	ENST00000252699	FSM	46.467	-0.956535	3.0996	-0.3086	0.757626	0.860201	Not	ACTN4-PB.2535.5-Anno	Annotated	90.6816	1.1681e-05	6.33553	7.5844e-07	31.6675	0.00993224	2.26782e-06	3.8003e-06	0.000233268	3.79113e-06	0	0	1.06901e-09	0
PB.2535.7	ENSG00000130402	ACTN4	ENST00000252699	FSM	4840.28	0.623955	0.153737	4.05858	4.93717e-05	0.000294435	Not	ACTN4-PB.2535.7-Anno	Annotated	3713.46	6079.93	241.602	384.311	237.685	295.279	230.297	191	253.751	349.75	360.645	503.636	356.628	350.895
PB.1612.1	ENSG00000131966	ACTR10	novel	NIC	107.685	-0.107062	0.296451	-0.361145	0.717991	0.828552	Not	ACTR10-PB.1612.1-novel	novel	110.287	105.001	13.9295	12.8327	15.176	7.56381	19.0537	10.7053	17.1487	13.329	10.5606	11.2838	15.8469	13.1434
PB.2734.1	ENSG00000138071	ACTR2	ENST00000260641	FSM	1577.25	0.594059	0.120451	4.93197	8.14062e-07	7.18588e-06	Not	ACTR2-PB.2734.1-Anno	Annotated	1211.69	1999.42	113.059	179.454	121.937	113.07	134.892	88.0434	107.355	167.149	153.963	269.486	133.673	172.997
PB.2734.2	ENSG00000138071	ACTR2	ENST00000260641	FSM	527.29	1.2091	1.2959	0.933023	0.350808	0.509526	Not	ACTR2-PB.2734.2-Anno	Annotated	341.221	703.865	26.6091	55.65	7.81256e-05	30.6431	16.3992	39.1033	46.8998	67.1559	32.816	21.1542	61.1844	95.9397
PB.2734.3	ENSG00000138071	ACTR2	ENST00000260641	FSM	552.416	0.471624	0.393928	1.19723	0.231215	0.378655	Not	ACTR2-PB.2734.3-Anno	Annotated	497.131	631.775	32.9701	39.5136	57.8409	3.76652	37.6232	33.7897	31.8301	41.1692	20.2558	72.3063	31.5398	32.2972
PB.2734.4	ENSG00000138071	ACTR2	ENST00000260641	FSM	504.211	1.60839	1.15551	1.39193	0.163945	0.291508	Not	ACTR2-PB.2734.4-Anno	Annotated	320.481	722.421	22.5034	48.8663	25.8114	34.9645	26.2368	25.5045	3.33818e-07	50.2212	48.6017	96.2344	30.5825	18.6915
PB.2734.5	ENSG00000138071	ACTR2	ENST00000260641	FSM	2090	0.995446	0.126806	7.85017	4.15481e-15	1.1927e-13	Not	ACTR2-PB.2734.5-Anno	Annotated	1360.87	2855.32	79.4458	163.227	61.3351	74.8953	78.336	91.6441	91.0187	139.673	149.261	166.543	152.656	208.001
PB.2808.1	ENSG00000115091	ACTR3	ENST00000263238	FSM	817.923	0.26453	0.114012	2.3202	0.0203301	0.0552555	Not	ACTR3-PB.2808.1-Anno	Annotated	725.752	920.534	29.2946	36.1053	27.8219	23.1267	34.5495	28.2203	32.7548	36.9003	34.1488	41.6528	31.0338	36.7906
PB.2808.2	ENSG00000115091	ACTR3	ENST00000263238	FSM	966.864	0.662239	0.241705	2.73986	0.00614646	0.020075	Not	ACTR3-PB.2808.2-Anno	Annotated	728.528	1228.86	48.3179	78.9483	68.5986	54.8778	32.4479	48.4267	37.2384	84.1279	62.408	107.739	87.7752	52.6914
PB.2808.3	ENSG00000115091	ACTR3	ENST00000263238	FSM	1306.88	1.55108	0.202158	7.67264	1.68497e-14	4.57245e-13	Not	ACTR3-PB.2808.3-Anno	Annotated	675.815	1977.05	45.8607	132.002	21.8171	61.4682	42.3562	41.8708	61.7913	101.426	129.51	150.003	120.488	158.583
PB.2808.4	ENSG00000115091	ACTR3	ENST00000263238	FSM	1437.52	1.17065	0.239591	4.88603	1.02891e-06	8.93476e-06	Not	ACTR3-PB.2808.4-Anno	Annotated	844.106	2091.15	106.321	253.719	128	121.097	95.2547	100.195	87.0593	240.053	195.843	358.848	171.196	302.654
PB.2851.1	ENSG00000115170	ACVR1	ENST00000434821	FSM	1110.07	0.351191	0.12921	2.71798	0.0065681	0.0212127	Not	ACVR1-PB.2851.1-Anno	Annotated	955.2	1284.8	75.5077	97.7467	96.2998	57.3963	91.3706	68.8797	63.5919	89.7827	92.5901	115.532	90.5484	100.28
PB.1185.1	ENSG00000135503	ACVR1B	ENST00000257963	FSM	573.322	-0.301048	0.190294	-1.58201	0.113646	0.219672	Not	ACVR1B-PB.1185.1-Anno	Annotated	619.8	516.2	43.8695	35.9124	46.7906	63.2641	29.34	35.771	44.1821	45.1562	36.378	31.5312	37.2406	29.2562
PB.2835.1	ENSG00000121989	ACVR2A	ENST00000241416	FSM	1435.97	-0.92313	0.0989835	-9.3261	1.09839e-20	5.22638e-19	Not	ACVR2A-PB.2835.1-Anno	Annotated	1822.2	1017.4	69.3827	38.0297	66.4178	67.4112	72.5658	74.1256	66.3934	36.8119	40.6127	30.8928	46.5216	35.3094
PB.1793.1	ENSG00000137845	ADAM10	ENST00000260408	FSM	1038.77	1.06761	0.206724	5.16442	2.41189e-07	2.40049e-06	Not	ADAM10-PB.1793.1-Anno	Annotated	672.335	1443.27	32.8185	67.2711	45.5842	19.8472	44.1969	19.9269	34.5372	58.4625	71.5585	84.2639	58.0597	64.0109
PB.1793.2	ENSG00000137845	ADAM10	novel	NIC	209.837	0.260918	0.436462	0.597803	0.549972	0.69198	Not	ADAM10-PB.1793.2-novel	novel	189.056	234.508	9.19264	11.0033	12.618	13.4102	7.53759	8.41131	3.98608	7.14665	7.98372	15.833	10.3726	13.6805
PB.1793.3	ENSG00000137845	ADAM10	ENST00000260408	FSM	13.538	-0.0614316	2.41681	-0.0254184	0.979721	0.988257	Not	ADAM10-PB.1793.3-Anno	Annotated	23.5798	2.43669	1.12451	0.116055	1.58188e-06	5.97507e-05	0.0252535	2.00866e-06	5.59725	0.161697	0.0217441	0.00037159	0.0717171	0.324744
PB.1793.5	ENSG00000137845	ADAM10	ENST00000260408	FSM	275.956	0.669962	0.395069	1.69581	0.0899222	0.182925	Not	ADAM10-PB.1793.5-Anno	Annotated	223.312	335.582	16.4924	23.6521	24.2323	19.5282	22.2281	3.85797	12.6156	18.6843	20.2528	27.9375	20.4505	30.9354
PB.1793.4	ENSG00000137845	ADAM10	ENST00000260408	FSM	697.33	2.8518	1.16045	2.4575	0.0139909	0.0406842	Up	ADAM10-PB.1793.4-Anno	Annotated	342.717	1067.6	16.3432	51.5946	0.546482	24.4375	0.266047	37.8153	18.6505	54.8632	42.1966	60.2294	45.8632	54.8207
PB.2618.1	ENSG00000151694	ADAM17	ENST00000310823	FSM	1363.72	-0.0211336	0.135623	-0.155827	0.87617	0.925399	Not	ADAM17-PB.2618.1-Anno	Annotated	1331.83	1410.55	83.0331	85.4127	79.8783	84.9479	87.4684	82.7314	80.1398	85.4342	79.6928	113.318	70.9672	77.651
PB.2618.2	ENSG00000151694	ADAM17	ENST00000310823	FSM	87.2988	7.02289	1.12128	6.26325	3.77025e-10	5.9124e-09	Up	ADAM17-PB.2618.2-Anno	Annotated	1.04078	175.857	0.0650359	11.1422	0	0	7.82132e-10	0.26219	0.0629893	8.90183e-05	7.93832	7.24268	12.6576	27.8723
PB.3031.2	ENSG00000149451	ADAM33	ENST00000356518	FSM	1180.54	-1.8726	0.204667	-9.14949	5.7201e-20	2.56371e-18	Not	ADAM33-PB.3031.2-Anno	Annotated	1799.61	526.428	116.854	33.2848	139.185	78.6534	134.998	128.758	102.674	26.6781	37.5252	27.2348	49.1565	25.8296
PB.4778.1	ENSG00000168615	ADAM9	ENST00000487273	FSM	296.878	-0.758814	0.414497	-1.83069	0.0671472	0.144508	Not	ADAM9-PB.4778.1-Anno	Annotated	336.513	254.402	18.2787	13.5339	10.6385	24.0515	16.2811	15.1144	25.308	2.24628	18.6316	17.3948	21.6345	7.76227
PB.4778.2	ENSG00000168615	ADAM9	ENST00000487273	FSM	1974.52	0.786116	0.180265	4.36088	1.2954e-05	8.92769e-05	Not	ADAM9-PB.4778.2-Anno	Annotated	1407.53	2602.89	82.1695	148.27	68.1184	75.4154	86.5068	95.5852	85.2214	157.175	109.293	202.889	138.4	133.59
PB.4778.3	ENSG00000168615	ADAM9	ENST00000487273	FSM	606.413	1.38449	1.28151	1.08036	0.279982	0.434839	Not	ADAM9-PB.4778.3-Anno	Annotated	325.864	908.112	19.4178	50.0849	46.2005	0.558201	5.58208	13.8301	30.918	21.2418	67.1395	64.0525	0.544517	97.4464
PB.3142.1	ENSG00000154734	ADAMTS1	ENST00000284984	FSM	14268.7	-0.766138	0.179267	-4.27373	1.92231e-05	0.000127305	Not	ADAMTS1-PB.3142.1-Anno	Annotated	17438.6	10944.1	824.096	502.518	848.638	718.667	820.294	1061.03	671.848	350.472	591.15	605.506	509.457	456.006
PB.3142.2	ENSG00000154734	ADAMTS1	ENST00000284984	FSM	1792.21	-2.89497	1.31382	-2.20347	0.0275618	0.0711	Not	ADAMTS1-PB.3142.2-Anno	Annotated	2942.05	626.097	183.286	36.7597	379.665	157.18	221.72	49.4998	108.363	59.2321	15.6553	72.4853	36.4257	0
PB.3142.3	ENSG00000154734	ADAMTS1	ENST00000284984	FSM	120.099	-2.36994	3.04235	-0.778985	0.435989	0.591796	Not	ADAMTS1-PB.3142.3-Anno	Annotated	237.935	0	17.7645	0	69.636	6.97232e-10	19.1864	3.29388e-09	0	0	0	0	0	0
PB.373.1	ENSG00000158859	ADAMTS4	ENST00000367996	FSM	4088.93	-0.187537	0.268856	-0.697536	0.485468	0.634891	Not	ADAMTS4-PB.373.1-Anno	Annotated	4244	3918.07	213.91	192.306	201.213	222.617	126.468	247.432	271.817	162.529	204.913	254.99	145.689	193.412
PB.373.2	ENSG00000158859	ADAMTS4	ENST00000367996	FSM	3062.56	-0.602365	0.303509	-1.98466	0.0471818	0.109623	Not	ADAMTS4-PB.373.2-Anno	Annotated	3644.25	2419.22	186.825	119.845	281.949	198.093	79.2836	170.143	204.658	102.052	133.922	141.036	121.357	100.857
PB.3144.1	ENSG00000154736	ADAMTS5	ENST00000284987	ISM	1539.28	-0.22047	0.220089	-1.00173	0.316473	0.47477	Not	ADAMTS5-PB.3144.1-Anno	Annotated	1608.4	1474.2	156.516	138.217	196.468	120.5	189.07	114.745	161.799	107.603	154.061	148.998	176.771	103.651
PB.4950.1	ENSG00000178031	ADAMTSL1	ENST00000327883	ISM	74.6699	0.617934	0.515961	1.19764	0.231058	0.378487	Not	ADAMTSL1-PB.4950.1-Anno	Annotated	57.2233	94.8856	5.17761	8.22675	4.15651	2.04134	5.5286	4.82919	9.33238	6.82853	8.29804	13.2048	2.68078	10.1216
PB.4950.2	ENSG00000178031	ADAMTSL1	ENST00000431052	ISM	114.967	0.116476	0.246648	0.472237	0.636758	0.760716	Not	ADAMTSL1-PB.4950.2-Anno	Annotated	106.893	122.624	6.76675	7.54586	7.47819	4.82195	7.45874	6.33749	7.73736	9.04429	7.92561	6.39671	6.00899	8.3537
PB.4950.3	ENSG00000178031	ADAMTSL1	ENST00000380566	ISM	30.6903	1.5101	0.530428	2.84694	0.0044141	0.0150539	Not	ADAMTSL1-PB.4950.3-Anno	Annotated	16.0763	46.5604	1.12911	3.1864	0.865396	0.73449	0.971257	1.28916	1.78525	3.20759	2.96438	4.21136	2.7142	2.83448
PB.4950.4	ENSG00000178031	ADAMTSL1	novel	NIC	707.516	0.910816	0.288531	3.15673	0.00159548	0.00628332	Not	ADAMTSL1-PB.4950.4-novel	novel	490.833	952.329	14.971	28.2488	9.54212	11.6379	12.814	13.9119	26.949	26.4867	20.5906	45.3204	22.4761	26.3701
PB.4950.5	ENSG00000178031	ADAMTSL1	ENST00000380570	FSM	187.363	0.00258439	0.20122	0.0128436	0.989753	0.993245	Not	ADAMTSL1-PB.4950.5-Anno	Annotated	182.083	192.486	28.1222	28.6069	38.0002	18.1003	31.3582	23.1365	30.0159	29.0145	22.3111	23.7425	30.4768	37.4895
PB.331.1	ENSG00000143382	ADAMTSL4	ENST00000271643	FSM	1284.08	-1.65586	0.319162	-5.18816	2.12387e-07	2.13833e-06	Not	ADAMTSL4-PB.331.1-Anno	Annotated	1893.8	644.8	100.06	32.9946	119.195	56.9124	120.757	81.1173	122.318	29.5596	43.4885	30.5626	43.4374	17.9247
PB.342.1	ENSG00000160710	ADAR	ENST00000368474	FSM	1646.42	-0.461445	0.341598	-1.35084	0.176745	0.30936	Not	ADAR-PB.342.1-Anno	Annotated	1875.58	1392.33	62.2207	45.0456	59.3008	25.5524	75.7152	49.0546	101.481	28.2006	48.7917	31.0064	70.6806	46.5486
PB.342.2	ENSG00000160710	ADAR	ENST00000368471	FSM	3161.95	0.347825	0.2101	1.65552	0.097819	0.195217	Not	ADAR-PB.342.2-Anno	Annotated	2783.2	3646.69	93.5947	118.181	115.138	101.333	130.613	80.9273	39.9623	130.766	91.8357	177.277	97.6354	93.3893
PB.342.3	ENSG00000160710	ADAR	ENST00000368471	FSM	27.7221	-2.44721	1.37831	-1.77552	0.0758126	0.159211	Not	ADAR-PB.342.3-Anno	Annotated	49.0206	4.31749	1.61011	0.136805	0.00654116	2.24369	0.788165	0.304001	4.70813	0.0634768	0.0224405	0.43233	0.141761	0.0240181
PB.342.4	ENSG00000160710	ADAR	ENST00000368471	FSM	195.03	-0.464165	0.458783	-1.01173	0.311667	0.469911	Not	ADAR-PB.342.4-Anno	Annotated	208.199	182.67	7.24434	6.08639	8.85491	5.3286	8.06944	8.11544	5.85332	3.87309	10.8532	7.33336	2.00888	6.36344
PB.2046.1	ENSG00000065457	ADAT1	ENST00000564657	FSM	200.993	-0.0627232	0.156118	-0.401768	0.687855	0.804466	Not	ADAT1-PB.2046.1-Anno	Annotated	199.925	203.392	12.8283	12.6263	18.7563	7.71345	14.393	11.7184	11.5603	16.0162	7.37746	13.17	16.0092	10.5585
PB.2046.2	ENSG00000065457	ADAT1	ENST00000307921	FSM	222.692	0.51071	0.171126	2.98441	0.00284124	0.0103721	Not	ADAT1-PB.2046.2-Anno	Annotated	177.125	270.329	14.5159	21.5381	17.2819	13.9998	16.712	12.7473	11.8388	30.1764	21.7892	19.6627	17.1251	18.9373
PB.770.6	ENSG00000148700	ADD3	ENST00000277900	FSM	190.66	6.3173	1.13217	5.5798	2.40793e-08	2.92957e-07	Up	ADD3-PB.770.6-Anno	Annotated	101.56	285.252	8.07553	20.0932	39.6409	0.688388	0.0483182	1.08981e-06	1.49827e-08	32.6518	29.8505	20.6392	2.10639	15.2182
PB.770.1	ENSG00000148700	ADD3	ENST00000360162	FSM	857.049	-1.92812	0.186159	-10.3574	3.874e-25	2.74619e-23	Not	ADD3-PB.770.1-Anno	Annotated	1336.04	351.001	96.1004	24.8537	50.1791	64.677	113.487	142.176	109.983	19.9798	20.403	29.1247	32.6213	22.1399
PB.770.2	ENSG00000148700	ADD3	ENST00000360162	FSM	893.402	-1.0329	0.105653	-9.77628	1.4234e-22	7.78609e-21	Not	ADD3-PB.770.2-Anno	Annotated	1169.06	601.374	119.427	59.7929	113.212	102.139	134.613	105.649	141.522	56.9401	57.8429	58.7332	65.6835	59.765
PB.770.3	ENSG00000148700	ADD3	novel	NNC	477.442	-1.38372	0.174522	-7.92864	2.21559e-15	6.46709e-14	Not	ADD3-PB.770.3-novel	novel	668.745	275.624	50.9749	20.3864	54.2661	37.1038	57.0149	53.162	53.3275	12.9816	19.6507	21.7331	27.0738	20.4927
PB.770.5	ENSG00000148700	ADD3	ENST00000277900	FSM	246.599	-0.635999	0.25471	-2.49696	0.0125264	0.0369636	Not	ADD3-PB.770.5-Anno	Annotated	302.349	189.78	28.7912	17.7508	7.73488	17.1039	40.8076	32.8279	45.4816	7.18667	14.342	21.8129	28.1417	17.2706
PB.770.7	ENSG00000148700	ADD3	ENST00000277900	FSM	25.5533	-6.98875	3.03011	-2.30644	0.0210863	0.0569542	Not	ADD3-PB.770.7-Anno	Annotated	49.746	0.000181346	4.78819	1.69753e-05	2.19803e-06	10.7932	7.28397	5.86373	3.18388e-07	9.8399e-07	0	4.04165e-05	7.55465e-07	4.27206e-05
PB.770.8	ENSG00000148700	ADD3	ENST00000277900	FSM	28.2987	9.86274	3.02256	3.26304	0.00110223	0.0045742	Up	ADD3-PB.770.8-Anno	Annotated	13.5581	42.969	1.00987	3.3228	2.62453e-07	5.04936	0	0	0	0.00230605	0.0042663	2.69043	9.1446	4.77239
PB.2474.1	ENSG00000123146	ADGRE5	ENST00000358600	FSM	1411.1	-0.863963	0.163518	-5.28358	1.26681e-07	1.3457e-06	Not	ADGRE5-PB.2474.1-Anno	Annotated	1756.95	1032.57	123.284	70.6473	152.08	99.4875	117.032	143.494	104.327	59.3174	86.3247	54.3731	94.3514	58.8698
PB.2474.2	ENSG00000123146	ADGRE5	ENST00000357355	FSM	712.646	-0.920541	0.148052	-6.21769	5.0453e-10	7.73724e-09	Not	ADGRE5-PB.2474.2-Anno	Annotated	901.446	513.316	67.2854	37.0425	97.1613	63.6374	65.4023	67.0701	43.1558	39.2167	46.7261	39.7461	40.9141	18.6097
PB.208.1	ENSG00000162618	ADGRL4	ENST00000370742	FSM	778.004	0.598331	0.316543	1.8902	0.0587306	0.130686	Not	ADGRL4-PB.208.1-Anno	Annotated	640.226	941.669	49.8033	70.699	28.6052	15.7844	70.1314	57.6398	76.8556	49.5905	61.3916	105.759	45.1418	91.6126
PB.208.2	ENSG00000162618	ADGRL4	ENST00000370742	FSM	0.269602	1.20555	3.13814	0.384161	0.700859	0.815829	Not	ADGRL4-PB.208.2-Anno	Annotated	0.00132589	0.537006	0.000106694	0.0409414	6.67727e-08	0	0.000332517	0.00013206	6.88293e-05	0.0460564	1.57699e-08	0.138623	0.020025	2.64388e-06
PB.208.3	ENSG00000162618	ADGRL4	ENST00000370742	FSM	345.224	2.47846	1.37164	1.80693	0.0707735	0.15091	Not	ADGRL4-PB.208.3-Anno	Annotated	193.173	507.794	16.5512	40.6697	46.2714	19.9671	0.000300463	1.2072	15.3098	28.5204	44.8772	52.4493	45.9518	31.5496
PB.3794.1	ENSG00000197894	ADH5	ENST00000296412	FSM	1645.1	-0.193905	0.105825	-1.83231	0.0669052	0.144255	Not	ADH5-PB.3794.1-Anno	Annotated	1716.4	1588.8	152.102	135.93	159.048	116.021	199.648	137.466	148.326	120.654	138.651	166.527	132.091	121.729
PB.1090.1	ENSG00000006831	ADIPOR2	ENST00000357103	FSM	523.805	0.207832	0.295516	0.703285	0.481878	0.631386	Not	ADIPOR2-PB.1090.1-Anno	Annotated	481.695	567.543	25.9568	30.2105	16.4087	36.7898	22.8675	30.2558	23.4623	35.667	23.9724	34.3778	25.193	31.842
PB.1090.2	ENSG00000006831	ADIPOR2	novel	NIC	12.9052	1.29989	2.83647	0.458278	0.646752	0.769743	Not	ADIPOR2-PB.1090.2-novel	novel	9.77167	17.2236	1.38075	2.35496	4.29117e-07	0	0	3.0399	3.86386	0.916856	0	7.75208	0	3.10584
PB.1090.3	ENSG00000006831	ADIPOR2	ENST00000357103	FSM	3.63485	-0.267822	3.0987	-0.0864305	0.931124	0.959763	Not	ADIPOR2-PB.1090.3-Anno	Annotated	6.82577	0.157726	1.13454	0.0239402	5.67271	0	0	0	2.19899e-08	0	0	7.60082e-09	0.119701	0
PB.1090.4	ENSG00000006831	ADIPOR2	novel	NIC	594.671	0.111744	0.276539	0.404082	0.686153	0.803151	Not	ADIPOR2-PB.1090.4-novel	novel	560.638	635.2	31.0549	33.7573	48.2422	37.4169	25.5018	19.7783	24.3352	23.4341	39.4391	44.3351	36.915	24.6633
PB.2118.1	ENSG00000170425	ADORA2B	ENST00000304222	FSM	35.8162	0.731346	1.11314	0.657013	0.511173	0.656892	Not	ADORA2B-PB.2118.1-Anno	Annotated	29.6802	41.758	3.66162	5.0333	4.04118	7.06146	1.89532	5.31013	0	3.80425	7.16469	5.07145	1.89355	7.23257
PB.3249.1	ENSG00000239900	ADSL	ENST00000623063	FSM	460.663	0.70123	0.136007	5.15583	2.52508e-07	2.49882e-06	Not	ADSL-PB.3249.1-Anno	Annotated	338.6	602	41.1463	70.3505	40.74	33.8497	51.381	34.2856	45.4752	64.8678	54.9373	110.344	58.0497	63.5537
PB.4511.1	ENSG00000106624	AEBP1	ENST00000223357	FSM	13769.3	-0.584778	0.172396	-3.39206	0.000693684	0.00306554	Not	AEBP1-PB.4511.1-Anno	Annotated	15957	11535	865.892	607.539	917.153	713.494	968.971	846.04	883.799	504.073	668.453	723.968	738.489	402.713
PB.1862.1	ENSG00000181026	AEN	ENST00000332810	FSM	272.936	0.979032	0.229646	4.26323	2.01496e-05	0.000132056	Not	AEN-PB.1862.1-Anno	Annotated	177.6	377	12.9739	26.4901	18.0205	11.9075	10.5248	11.7087	12.7081	25.666	21.382	34.9032	20.2937	30.2056
PB.4133.1	ENSG00000157510	AFAP1L1	ENST00000296721	FSM	32.2037	-10.3226	3.00947	-3.43003	0.000603507	0.00272068	Down	AFAP1L1-PB.4133.1-Anno	Annotated	55.6495	9.39456	4.06453	0.697835	0	3.75034	13.1119	0	3.46037	3.45928	0.0298998	1.55904e-07	0	0
PB.4133.2	ENSG00000157510	AFAP1L1	ENST00000296721	FSM	338.025	0.185963	0.262623	0.708099	0.478884	0.628173	Not	AFAP1L1-PB.4133.2-Anno	Annotated	312.75	364.805	19.9566	22.394	28.5436	9.98941	19.468	21.2232	20.5588	18.1871	23.3172	23.0778	22.8633	24.5246
PB.3782.1	ENSG00000172493	AFF1	novel	NIC	505.731	-0.285082	0.198409	-1.43684	0.150763	0.273459	Not	AFF1-PB.3782.1-novel	novel	539.642	467.307	35.0844	29.5701	40.2832	29.3583	43.0358	27.2385	35.506	32.4351	33.1457	21.4505	32.5055	28.3137
PB.4090.1	ENSG00000072364	AFF4	ENST00000378595	ISM	3387.1	0.110632	0.187785	0.589142	0.555766	0.695658	Not	AFF4-PB.4090.1-Anno	Annotated	3181	3605.8	324.429	358.265	342.27	416.405	246.092	328.682	288.697	362.468	346.213	433.53	314.505	334.61
PB.2332.1	ENSG00000141385	AFG3L2	ENST00000269143	FSM	480.202	0.43409	0.190505	2.27863	0.0226893	0.0605775	Not	AFG3L2-PB.2332.1-Anno	Annotated	406.102	565.566	28.6111	38.7419	21.4509	32.9313	43.0884	25.7835	19.8014	34.641	38.3637	48.1813	31.3984	41.1251
PB.2332.2	ENSG00000141385	AFG3L2	ENST00000269143	FSM	1.27109	0.784602	3.10621	0.252592	0.800584	0.881382	Not	AFG3L2-PB.2332.2-Anno	Annotated	0.0127082	2.95761	0.00088627	0.192153	0	0.000834522	1.04314e-09	7.71366e-10	0.00359683	3.73929e-09	1.44319e-08	0.960762	3.20413e-07	4.98146e-07
PB.2332.3	ENSG00000141385	AFG3L2	ENST00000269143	FSM	557.439	0.218071	0.144155	1.51276	0.130342	0.24408	Not	AFG3L2-PB.2332.3-Anno	Annotated	503.485	617.876	37.9768	45.0424	47.2158	29.9655	39.3348	28.1243	45.2437	54.0466	38.7804	51.8951	42.429	38.0607
PB.2727.1	ENSG00000119844	AFTPH	ENST00000695864	FSM	336.234	0.00852148	0.251461	0.0338878	0.972967	0.985479	Not	AFTPH-PB.2727.1-Anno	Annotated	330.692	339.097	22.9286	23.0536	22.8807	24.8539	13.4989	31.8261	21.5834	23.2738	24.168	25.2911	21.6582	20.8766
PB.2727.2	ENSG00000119844	AFTPH	ENST00000695868	ISM	82.9914	-0.730124	0.348378	-2.09578	0.0361017	0.0884962	Not	AFTPH-PB.2727.2-Anno	Annotated	101.04	64.7577	9.11937	5.61389	10.8517	5.26777	9.09188	9.35333	11.0322	4.39295	5.8626	7.73194	5.01113	5.07083
PB.2727.3	ENSG00000119844	AFTPH	ENST00000238856	FSM	732.106	-0.53186	0.17098	-3.11065	0.00186673	0.00721256	Not	AFTPH-PB.2727.3-Anno	Annotated	846.468	605.745	60.6061	42.4858	59.7019	85.2581	52.5259	51.1827	54.3618	39.8485	39.2746	41.326	46.4203	45.5597
PB.4668.1	ENSG00000146856	AGBL3	novel	NIC	358.66	-0.149243	0.145634	-1.02478	0.305466	0.463334	Not	AGBL3-PB.4668.1-novel	novel	368.939	346.395	26.3787	23.9131	39.3153	19.6899	26.8867	20.64	25.3614	27.0997	21.0585	20.9608	25.4813	24.9651
PB.4003.1	ENSG00000164252	AGGF1	ENST00000312916	FSM	613.107	0.3172	0.131967	2.40362	0.0162335	0.0458955	Not	AGGF1-PB.4003.1-Anno	Annotated	535.849	698.339	35.6089	45.0526	34.0406	28.6622	49.6325	32.9098	32.7993	41.6749	43.5613	46.6294	44.6274	48.77
PB.4003.2	ENSG00000164252	AGGF1	ENST00000312916	ISM	98.046	0.198383	0.507225	0.391115	0.695712	0.811606	Not	AGGF1-PB.4003.2-Anno	Annotated	87.1527	108.831	9.84459	11.9394	11.9294	8.72915	8.77713	5.69593	14.0913	13.6926	14.1311	11.4044	16.4678	4.00126
PB.4003.3	ENSG00000164252	AGGF1	ENST00000312916	FSM	5.33746	0.776151	3.10125	0.250271	0.802378	0.881702	Not	AGGF1-PB.4003.3-Anno	Annotated	0	10.5587	0	0.781794	0	0	0	0	0	0	3.90896	0	0	9.88254e-06
PB.4003.4	ENSG00000164252	AGGF1	novel	NIC	82.4722	-0.234773	0.289232	-0.811712	0.416957	0.573584	Not	AGGF1-PB.4003.4-novel	novel	87.3038	77.0038	11.1294	9.42083	16.4984	7.7754	12.9277	8.02456	10.4207	9.75995	8.1173	8.24991	9.9138	11.0632
PB.4914.1	ENSG00000123908	AGO2	ENST00000523609	ISM	1050.19	0.153863	0.160635	0.957841	0.338143	0.496634	Not	AGO2-PB.4914.1-Anno	Annotated	964.2	1147.8	88.3642	102.101	96.3301	92.8891	80.1409	92.901	79.56	101.338	87.595	130.786	91.3737	99.4107
PB.4708.5	ENSG00000155189	AGPAT5	ENST00000285518	FSM	55.4414	6.09934	1.32905	4.58925	4.44852e-06	3.38117e-05	Up	AGPAT5-PB.4708.5-Anno	Annotated	8.29861	107.364	0.670534	8.58963	0	2.25017	1.10222	0	0.000287524	8.12058	6.95842	13.2605	3.1545	11.4541
PB.4708.2	ENSG00000155189	AGPAT5	ENST00000285518	FSM	48.7877	6.55057	1.95362	3.35305	0.000799275	0.00347252	Up	AGPAT5-PB.4708.2-Anno	Annotated	8.54226	95.8043	0.531436	5.93253	0	2.652	0	0.00517899	0	0.00709828	6.51798	15.1261	4.11415	3.89731
PB.4708.1	ENSG00000155189	AGPAT5	ENST00000285518	FSM	45.6318	0.277181	2.3903	0.115961	0.907684	0.944105	Not	AGPAT5-PB.4708.1-Anno	Annotated	28.0481	62.051	1.77512	3.98859	0	3.54754e-08	1.68205	3.55162	3.64192	10.9837	4.43908	6.15823e-08	4.74566e-08	4.52017
PB.4708.3	ENSG00000155189	AGPAT5	ENST00000285518	FSM	8.01751	3.24256	3.00843	1.07782	0.281113	0.436127	Not	AGPAT5-PB.4708.3-Anno	Annotated	0.782325	17.5054	0.0488623	1.0617	0	0	0	0.244312	0	0.309256	1.33653e-06	4.75181	0.000233956	0.247208
PB.4708.4	ENSG00000155189	AGPAT5	ENST00000285518	FSM	294.794	0.431082	0.232735	1.85224	0.0639912	0.139269	Not	AGPAT5-PB.4708.4-Anno	Annotated	244.529	348.676	13.7863	18.9156	19.9406	11.4289	13.3645	10.7157	13.4815	13.8851	17.0374	20.6121	21.2346	21.8086
PB.2886.1	ENSG00000018510	AGPS	ENST00000680677	ISM	45.7573	0.286475	0.373175	0.767669	0.442684	0.596687	Not	AGPS-PB.2886.1-Anno	Annotated	40.5444	51.5061	4.71124	5.80113	4.08416	3.81991	5.88585	2.55167	7.2146	7.45039	4.29452	5.98527	3.85394	7.42154
PB.2886.2	ENSG00000018510	AGPS	ENST00000264167	FSM	866.769	0.59443	0.137301	4.3294	1.49514e-05	0.000101433	Not	AGPS-PB.2886.2-Anno	Annotated	670.456	1087.89	46.4007	72.9507	40.9778	38.8172	52.4228	47.3725	52.4131	64.3756	65.5132	100.954	59.9557	73.9545
PB.554.1	ENSG00000153207	AHCTF1	ENST00000648844	FSM	3597.66	-0.157851	0.167916	-0.940059	0.347187	0.505853	Not	AHCTF1-PB.554.1-Anno	Annotated	3694.62	3514.75	107.072	99.3565	104.345	129.025	100.729	108.767	92.494	99.9489	88.2893	128.082	88.1592	92.3031
PB.554.2	ENSG00000153207	AHCTF1	ENST00000366508	ISM	7.08666	-0.952521	3.10086	-0.30718	0.758707	0.860201	Not	AHCTF1-PB.554.2-Anno	Annotated	13.8536	0	1.09442	0	5.47208	0	0	0	0	0	0	0	0	0
PB.268.1	ENSG00000168710	AHCYL1	ENST00000359172	ISM	1543.93	-0.224124	0.102274	-2.1914	0.0284232	0.0730236	Not	AHCYL1-PB.268.1-Anno	Annotated	1614.4	1470.8	200.989	177.845	209.539	202.797	190.825	206.534	195.252	167.252	168.931	205.721	175.608	171.714
PB.932.1	ENSG00000124942	AHNAK	ENST00000378024	ISM	66934.5	-1.39519	0.090377	-15.4374	9.17332e-54	4.55193e-51	Not	AHNAK-PB.932.1-Anno	Annotated	94306.3	37954.9	2151.2	844.499	2345.4	1884.86	2283.51	2305.01	1937.22	718.384	847.14	832.021	1005.05	819.904
PB.933.1	ENSG00000124942	AHNAK	ENST00000378024	FSM	11117.4	-1.71567	0.117136	-14.6468	1.41245e-48	4.46013e-46	Not	AHNAK-PB.933.1-Anno	Annotated	16606.1	5366.76	1064.64	334.958	1058.33	1011.89	1343.66	991.219	918.102	268.423	345.568	341.086	417.311	302.404
PB.933.4	ENSG00000124942	AHNAK	ENST00000378024	ISM	12643.9	-1.27097	0.131907	-9.63537	5.66869e-22	2.87448e-20	Not	AHNAK-PB.933.4-Anno	Annotated	17359	7610.68	1590.28	677.78	1747.13	1346.35	1511.19	1911.52	1435.25	546.093	657.83	713.266	743.2	728.513
PB.933.6	ENSG00000124942	AHNAK	ENST00000528508	FSM	773.851	-1.16428	0.272313	-4.2755	1.90709e-05	0.000126418	Not	AHNAK-PB.933.6-Anno	Annotated	1035.92	497.77	73.1942	34.5707	66.1104	72.1407	106.368	59.9945	61.3577	36.1708	35.8702	22.9214	54.4888	23.4023
PB.933.7	ENSG00000124942	AHNAK	ENST00000378024	FSM	1.33045	-1.72696	3.06238	-0.563927	0.572804	0.708938	Not	AHNAK-PB.933.7-Anno	Annotated	2.39963	0.514677	0.168581	0.0350125	0.334957	0.323073	0.134997	0.0241072	0.0257706	0.0589425	0.0897428	7.19126e-08	0.014039	0.0123383
PB.933.8	ENSG00000124942	AHNAK	ENST00000378024	FSM	1220.85	-1.3351	1.39878	-0.954475	0.339843	0.497868	Not	AHNAK-PB.933.8-Anno	Annotated	1480.4	909.341	108.326	64.1405	285.082	94.7973	51.6004	18.7716	91.3787	106.079	72.8386	0.000111709	114.522	27.2627
PB.499.1	ENSG00000186063	AIDA	ENST00000340020	FSM	2319.41	0.0336083	0.123862	0.271336	0.786132	0.87307	Not	AIDA-PB.499.1-Anno	Annotated	2236	2424.8	170.29	179.344	156.538	126.356	189.087	204.41	175.057	143.075	160.497	222.568	176.59	193.989
PB.664.1	ENSG00000042286	AIFM2	ENST00000307864	FSM	365.921	0.0198465	0.155104	0.127956	0.898184	0.938581	Not	AIFM2-PB.664.1-Anno	Annotated	356.524	377.483	25.7652	26.4375	30.537	16.6252	32.7451	23.3751	25.5438	27.3815	22.7403	26.2086	31.7497	24.1075
PB.4378.1	ENSG00000146416	AIG1	ENST00000494282	FSM	505.424	-0.294994	0.123746	-2.38387	0.0171315	0.0480472	Not	AIG1-PB.4378.1-Anno	Annotated	544.208	466.63	35.987	29.9165	39.4181	26.7307	44.2501	36.0101	33.5262	28.4384	27.4239	31.1427	29.678	32.8997
PB.3812.1	ENSG00000164022	AIMP1	ENST00000671960	ISM	854.768	0.0154038	0.0997295	0.154456	0.877251	0.925651	Not	AIMP1-PB.3812.1-Anno	Annotated	828.013	881.272	59.8584	61.8594	72.4911	46.3157	65.6252	54.2569	60.6029	67.9462	57.9683	57.2768	67.4729	58.6326
PB.1538.1	ENSG00000129474	AJUBA	ENST00000262713	FSM	417.536	-0.744153	0.207882	-3.57968	0.00034401	0.0016493	Not	AJUBA-PB.1538.1-Anno	Annotated	513.564	317.442	31.8066	19.106	37.8979	39.1252	38.5399	22.2073	21.2628	16.9513	20.052	18.757	23.8524	15.9174
PB.5112.1	ENSG00000106992	AK1	ENST00000644144	FSM	496.127	-0.0709946	0.149277	-0.475589	0.634367	0.758642	Not	AK1-PB.5112.1-Anno	Annotated	494.861	497.763	70.697	68.8264	82.1409	59.1827	90.948	58.9478	62.2656	83.5549	57.8351	62.0091	67.1221	73.6109
PB.96.1	ENSG00000004455	AK2	ENST00000373449	FSM	692.468	0.328347	0.146977	2.23401	0.0254825	0.0666518	Not	AK2-PB.96.1-Anno	Annotated	597.313	799.76	36.8509	47.9956	34.0388	40.6417	40.7659	30.2631	38.5452	52.2207	40.2778	60.7653	40.3752	46.3388
PB.96.3	ENSG00000004455	AK2	ENST00000672715	FSM	996.921	-0.0514193	0.0969444	-0.5304	0.595835	0.727463	Not	AK2-PB.96.3-Anno	Annotated	986.68	1004.19	54.4452	54.1793	53.1457	56.1749	58.8113	49.8247	54.2696	58.5687	52.2621	51.0397	56.6529	52.3732
PB.4937.1	ENSG00000147853	AK3	ENST00000381809	FSM	6.18864	-0.926051	3.10085	-0.298644	0.765211	0.861995	Not	AK3-PB.4937.1-Anno	Annotated	12.9995	0	1.7073	0	0	0	8.53648	0	0	0	0	0	0	0
PB.4937.2	ENSG00000147853	AK3	ENST00000381809	FSM	1041.19	-0.191902	0.12867	-1.49143	0.135849	0.252139	Not	AK3-PB.4937.2-Anno	Annotated	1082.35	999.668	147.86	132.939	126.366	129.263	160.758	165.895	157.019	126.284	139.002	147.662	123.691	128.057
PB.4937.3	ENSG00000147853	AK3	ENST00000447596	FSM	30.3812	0.199236	0.979737	0.203356	0.838856	0.90223	Not	AK3-PB.4937.3-Anno	Annotated	32.6911	27.6098	4.41101	3.7174	0	7.04493	6.65427	4.68104	3.67482	2.33223	2.9237	3.24465	4.87159	5.21483
PB.177.1	ENSG00000162433	AK4	ENST00000497030	FSM	256.875	1.00626	1.22617	0.820657	0.411842	0.569139	Not	AK4-PB.177.1-Anno	Annotated	192.867	321.421	26.8256	43.3326	39.5605	40.1749	0	29.6493	24.7431	26.2556	52.6372	48.9004	43.4753	45.3944
PB.177.2	ENSG00000162433	AK4	ENST00000395334	FSM	102.851	0.137721	0.649831	0.211933	0.832159	0.898886	Not	AK4-PB.177.2-Anno	Annotated	97.7479	107.973	13.2747	14.5076	5.78898	19.1497	24.1658	3.35064	13.9185	31.5339	7.7942	7.90401	7.46598	17.8397
PB.177.3	ENSG00000162433	AK4	ENST00000327299	FSM	117.984	0.92827	0.364622	2.54584	0.0109014	0.0327561	Not	AK4-PB.177.3-Anno	Annotated	77.7847	163.006	10.4265	21.2377	9.53271	13.5589	12.1952	7.02082	9.8247	30.5364	11.9896	29.4943	14.7074	19.461
PB.199.2	ENSG00000154027	AK5	ENST00000354567	FSM	43.0961	-0.0847029	0.388425	-0.218068	0.827376	0.89641	Not	AK5-PB.199.2-Anno	Annotated	42.8297	43.2465	2.9267	2.87774	2.57965	2.71665	3.42934	2.69069	3.21715	2.62752	4.04439	2.89537	2.77951	2.04193
PB.2236.1	ENSG00000121057	AKAP1	ENST00000337714	FSM	649.985	-0.694884	0.130475	-5.3258	1.00507e-07	1.08758e-06	Not	AKAP1-PB.2236.1-Anno	Annotated	776.4	508	56.2941	35.9059	78.7927	59.6801	43.4319	46.654	52.9115	44.5928	40.1223	27.0198	41.631	26.1638
PB.4398.3	ENSG00000131016	AKAP12	ENST00000253332	FSM	993.819	-2.5049	0.476337	-5.25868	1.45094e-07	1.51119e-06	Down	AKAP12-PB.4398.3-Anno	Annotated	1559.83	397.136	51.7719	12.6773	56.22	50.4324	53.1868	54.3872	44.6331	11.4574	28.5782	15.7759	2.015	5.56028
PB.4398.1	ENSG00000131016	AKAP12	ENST00000253332	ISM	93.7036	-0.654557	0.365495	-1.79088	0.0733131	0.155418	Not	AKAP12-PB.4398.1-Anno	Annotated	111.798	73.1426	5.92149	3.74421	9.3903	3.49838	3.2645	7.06409	6.39015	2.95468	3.18291	2.85073	3.50142	6.2313
PB.4398.10	ENSG00000131016	AKAP12	ENST00000354675	FSM	2318.61	-0.585887	0.172861	-3.38935	0.000700593	0.00309213	Not	AKAP12-PB.4398.10-Anno	Annotated	2726.47	1868.5	93.5754	62.8515	78.4346	77.0775	67.7351	118.639	125.991	53.6426	53.1813	70.3468	66.0557	71.0312
PB.4398.15	ENSG00000131016	AKAP12	ENST00000359755	ISM	104.351	0.981273	1.08581	0.903726	0.366141	0.524336	Not	AKAP12-PB.4398.15-Anno	Annotated	74.5926	134.525	3.78788	6.75521	4.97574	3.62238	1.56179e-05	7.52691	2.81435	8.94697	0.652021	6.79854	6.7041	10.6744
PB.4398.5	ENSG00000131016	AKAP12	ENST00000253332	ISM	1.59762	0.75578	3.1054	0.243376	0.807714	0.883234	Not	AKAP12-PB.4398.5-Anno	Annotated	0	3.1552	0	0.350023	0	0	0	0	0	1.75011	0	0	0	0
PB.4398.6	ENSG00000131016	AKAP12	ENST00000253332	ISM	137.7	0.527583	0.432734	1.21919	0.222774	0.36769	Not	AKAP12-PB.4398.6-Anno	Annotated	115.133	157.551	13.5943	18.3457	14.4422	14.3912	2.73515	14.2954	22.1077	17.5989	9.99297	13.1418	26.0462	24.9486
PB.4398.8	ENSG00000131016	AKAP12	ENST00000354675	ISM	17.1763	-1.27363	1.26247	-1.00883	0.313054	0.47134	Not	AKAP12-PB.4398.8-Anno	Annotated	21.6085	13.3133	2.17239	1.27823	3.71355	0	4.04007	2.09704	1.01131	1.52987	0	2.01416	2.84714	0
PB.4398.9	ENSG00000131016	AKAP12	ENST00000354675	ISM	0.10542	-0.626301	3.15724	-0.19837	0.842756	0.902486	Not	AKAP12-PB.4398.9-Anno	Annotated	0.160014	0	0.00882896	0	0	0	0	0	0.0441448	0	0	0	0	0
PB.5394.1	ENSG00000197976	AKAP17A	ENST00000313871	FSM	1093.63	0.0413023	0.150575	0.274297	0.783856	0.87183	Not	AKAP17A-PB.5394.1-Anno	Annotated	1055.6	1131.8	74.7036	78.3406	72.4367	101.202	66.0371	66.7724	67.0695	83.0921	76.5354	86.236	74.3615	71.4777
PB.115.1	ENSG00000174574	AKIRIN1	ENST00000432648	FSM	426.523	-0.666528	1.3549	-0.49194	0.622762	0.749867	Not	AKIRIN1-PB.115.1-Anno	Annotated	533.378	316.418	62.2233	35.6655	61.3063	100.027	75.334	74.4487	1.27405e-08	10.3298	57.2733	45.8107	25.9743	38.9392
PB.115.3	ENSG00000174574	AKIRIN1	ENST00000432648	FSM	648.928	1.62666	1.11949	1.45304	0.146213	0.266809	Not	AKIRIN1-PB.115.3-Anno	Annotated	379.21	932.735	45.25	108.267	53.8475	46.4733	0.123915	33.834	91.9715	117.722	76.5531	131.456	98.176	117.429
PB.5077.1	ENSG00000106948	AKNA	ENST00000374088	FSM	785.958	-1.2624	0.178407	-7.07596	1.48418e-12	3.18228e-11	Not	AKNA-PB.5077.1-Anno	Annotated	1078.6	478.6	42.8302	18.5402	49.4233	32.9988	53.0272	39.6604	39.0414	21.4233	19.4134	15.8936	23.2826	12.688
PB.2541.1	ENSG00000105221	AKT2	ENST00000392038	FSM	1374.06	-0.328998	0.114868	-2.86413	0.00418151	0.0144286	Not	AKT2-PB.2541.1-Anno	Annotated	1491.46	1251.09	103.693	84.3689	129.401	87.7497	118.178	83.5732	99.564	92.5016	77.988	81.1432	96.3189	73.8927
PB.2541.2	ENSG00000105221	AKT2	ENST00000391844	FSM	249.513	-0.608322	0.390559	-1.55756	0.119337	0.22832	Not	AKT2-PB.2541.2-Anno	Annotated	281.742	219.305	20.8783	15.5803	26.1807	24.9624	18.8033	13.2667	21.1782	11.31	20.9569	25.7735	14.7689	5.09235
PB.5076.1	ENSG00000148218	ALAD	ENST00000409155	FSM	755.697	-0.173459	0.0981817	-1.76671	0.0772763	0.161698	Not	ALAD-PB.5076.1-Anno	Annotated	779.43	729.389	56.2496	51.1662	64.7327	56.4205	62.3429	48.2909	49.4612	50.6972	53.7645	47.7763	54.4352	49.1578
PB.5076.2	ENSG00000148218	ALAD	ENST00000409155	FSM	22.0508	-1.69555	1.63796	-1.03516	0.300593	0.457872	Not	ALAD-PB.5076.2-Anno	Annotated	35.1695	8.6112	4.35582	0.997499	7.88965	0	7.59613	0.410234	5.88306	0.666375	1.6203	1.15341	1.5474	0
PB.3468.1	ENSG00000170017	ALCAM	ENST00000306107	FSM	791.529	-0.0949581	0.27112	-0.350243	0.726156	0.836585	Not	ALCAM-PB.3468.1-Anno	Annotated	791.699	784.778	35.0492	34.2984	28.428	30.2762	28.1261	45.4069	43.0088	41.2555	34.3331	34.1087	43.5531	18.2414
PB.3468.2	ENSG00000170017	ALCAM	ENST00000306107	FSM	212.795	3.79677	2.40816	1.57663	0.114881	0.221565	Not	ALCAM-PB.3468.2-Anno	Annotated	77.6043	356.466	3.49648	16.057	1.71629	15.7661	3.99392e-06	6.7953e-09	6.32342e-06	13.7467	13.4468	20.3057	3.69167e-05	32.786
PB.3468.3	ENSG00000170017	ALCAM	ENST00000306107	FSM	213.563	-1.26642	0.809093	-1.56523	0.117529	0.225857	Not	ALCAM-PB.3468.3-Anno	Annotated	237.193	194.464	13.5865	10.4842	26.8163	17.488	10.0955	10.1749	3.35779	10.9105	16.8854	21.0947	3.52993	0.000254466
PB.3468.4	ENSG00000170017	ALCAM	ENST00000472644	FSM	91.9816	0.340868	0.371951	0.916431	0.359441	0.517199	Not	ALCAM-PB.3468.4-Anno	Annotated	80.5157	105.24	4.56957	5.80619	4.88788	4.77218	4.57776	6.40915	2.20087	4.46417	4.66252	8.11011	5.94522	5.84891
PB.3468.6	ENSG00000170017	ALCAM	ENST00000306107	ISM	279.798	-0.61536	0.251773	-2.4441	0.0145214	0.0417896	Not	ALCAM-PB.3468.6-Anno	Annotated	327.737	225.196	34.6914	22.9847	68.3104	30.2295	18.8539	31.5188	24.5442	34.2319	25.7937	18.2785	27.4406	9.17874
PB.3468.5	ENSG00000170017	ALCAM	ENST00000306107	FSM	117.027	3.17737	1.18918	2.6719	0.00754236	0.0239473	Up	ALCAM-PB.3468.5-Anno	Annotated	51.4514	186.056	3.04538	10.8081	2.17527e-07	4.06257	5.98633	0.00182582	5.17618	3.71283	6.67399	9.95987	13.5027	20.1912
PB.728.2	ENSG00000059573	ALDH18A1	ENST00000371224	FSM	515.457	2.52178	0.608447	4.14462	3.40373e-05	0.000211689	Up	ALDH18A1-PB.728.2-Anno	Annotated	192.276	869.572	12.7651	56.7812	0.724863	11.8965	28.8506	14.702	7.6514	64.3213	47.2503	73.8071	46.9887	51.5385
PB.728.1	ENSG00000059573	ALDH18A1	ENST00000371224	FSM	444.66	0.691746	0.348909	1.9826	0.0474127	0.110022	Not	ALDH18A1-PB.728.1-Anno	Annotated	335.324	563.428	21.5969	34.9062	30.8307	20.7744	9.75785	19.5276	27.0941	25.1817	34.2519	48.4896	32.0315	34.5764
PB.1882.1	ENSG00000184254	ALDH1A3	ENST00000329841	FSM	672.627	1.917	0.38775	4.9439	7.65748e-07	6.82007e-06	Not	ALDH1A3-PB.1882.1-Anno	Annotated	245.8	1180	15.6076	71.7334	13.2334	20.2771	14.0085	9.93555	20.5836	52.8332	42.8264	176.141	48.6739	38.1926
PB.4986.1	ENSG00000137124	ALDH1B1	ENST00000377698	FSM	688.125	0.434297	0.107105	4.05486	5.0165e-05	0.000298882	Not	ALDH1B1-PB.4986.1-Anno	Annotated	571.57	811.538	43.3189	59.5143	57.13	34.2422	48.884	34.7282	41.6101	70.9767	55.8119	57.4036	60.9328	52.4467
PB.1312.1	ENSG00000136010	ALDH1L2	ENST00000258494	FSM	383.559	2.32886	1.35224	1.72223	0.0850275	0.174604	Not	ALDH1L2-PB.1312.1-Anno	Annotated	211.371	560.139	5.81246	15.6523	6.96796e-09	10.0626	3.08667	14.4132	1.49985	21.6842	14.5853	15.1419	7.70944	19.1405
PB.1312.2	ENSG00000136010	ALDH1L2	ENST00000258494	FSM	2059.76	0.641696	0.142708	4.49658	6.90556e-06	5.0551e-05	Not	ALDH1L2-PB.1312.2-Anno	Annotated	1583.98	2600.48	46.5887	73.6619	52.1499	30.9899	59.4755	35.9161	54.4123	65.8938	66.7662	99.39	70.6375	65.6219
PB.2131.2	ENSG00000072210	ALDH3A2	ENST00000176643	FSM	338.036	-0.946423	0.397841	-2.3789	0.0173644	0.0485825	Not	ALDH3A2-PB.2131.2-Anno	Annotated	440.541	223.235	38.4342	19.1628	43.7022	57.5537	12.7206	41.1722	37.0224	25.807	12.7364	20.993	18.472	17.8057
PB.2131.3	ENSG00000072210	ALDH3A2	ENST00000176643	FSM	763.785	-1.6271	0.316802	-5.13603	2.806e-07	2.73782e-06	Not	ALDH3A2-PB.2131.3-Anno	Annotated	1113.32	388.697	67.0389	23.2919	50.6742	72.8317	84.8226	81.1764	45.6894	25.3485	16.9695	11.4141	37.9696	24.7576
PB.2131.4	ENSG00000072210	ALDH3A2	ENST00000176643	FSM	161.095	0.596911	1.17652	0.507353	0.611907	0.741482	Not	ALDH3A2-PB.2131.4-Anno	Annotated	227.75	95.1882	19.8934	7.65458	55.4906	3.44511	37.9609	0.00323931	2.56717	5.20755	12.6271	3.24512	7.65875	9.53437
PB.2131.1	ENSG00000072210	ALDH3A2	ENST00000176643	FSM	149.525	-2.11469	0.851563	-2.48331	0.013017	0.038204	Down	ALDH3A2-PB.2131.1-Anno	Annotated	218.173	78.3821	13.8518	4.77557	12.2433	14.3994	17.9421	10.5286	14.1457	4.3528	9.47748	6.16769	7.04695e-09	3.87989
PB.972.1	ENSG00000006534	ALDH3B1	ENST00000342456	FSM	365.904	-0.496442	0.252304	-1.96763	0.0491104	0.11297	Not	ALDH3B1-PB.972.1-Anno	Annotated	418.083	308.984	43.199	30.9702	59.0823	44.0304	53.2753	27.1006	32.5063	38.601	30.4683	20.5642	35.9645	29.2528
PB.1650.1	ENSG00000119711	ALDH6A1	ENST00000553458	FSM	289.103	-0.596708	0.178114	-3.35014	0.000807709	0.00350259	Not	ALDH6A1-PB.1650.1-Anno	Annotated	339.8	235.4	36.7485	24.7496	35.0376	27.4075	45.548	34.0442	41.7051	23.9268	26.2504	22.2562	26.3091	25.0055
PB.4073.1	ENSG00000164904	ALDH7A1	ENST00000409134	FSM	597.553	0.169789	0.105093	1.61561	0.106178	0.207956	Not	ALDH7A1-PB.4073.1-Anno	Annotated	552.234	651.624	50.3704	57.4943	53.4685	41.7848	70.5657	41.8502	44.183	58.8678	53.4048	65.0787	58.2723	51.8479
PB.382.1	ENSG00000143149	ALDH9A1	ENST00000354775	FSM	1539.18	0.0304742	0.106401	0.286408	0.774566	0.86663	Not	ALDH9A1-PB.382.1-Anno	Annotated	1476.8	1606.2	165.959	175.788	168.894	168.463	176.882	155.404	160.153	208.881	171.938	184.238	167.561	146.321
PB.1474.1	ENSG00000253710	ALG11	ENST00000521508	FSM	371.305	0.0985177	0.118412	0.831988	0.405416	0.56351	Not	ALG11-PB.1474.1-Anno	Annotated	349.6	396	31.0232	34.2469	28.3794	29.1485	37.1284	30.6713	29.7883	35.6477	32.8	37.9043	35.6736	29.2089
PB.5040.1	ENSG00000119523	ALG2	ENST00000238477	FSM	571.095	0.53836	0.166777	3.22803	0.00124647	0.00507574	Not	ALG2-PB.5040.1-Anno	Annotated	449.6	707.8	51.1743	77.9375	52.1159	46.4035	52.9645	55.7655	48.6223	71.4442	63.5657	107.884	65.2387	81.5546
PB.2123.1	ENSG00000091542	ALKBH5	ENST00000399138	FSM	265.157	-0.328987	0.304245	-1.08132	0.279554	0.434368	Not	ALKBH5-PB.2123.1-Anno	Annotated	280.759	258.017	18.3639	16.0992	15.881	9.75951	28.5903	18.4232	19.1653	10.3686	11.4845	28.9475	7.16249	22.5328
PB.2123.2	ENSG00000091542	ALKBH5	ENST00000399138	FSM	379.204	-0.924734	0.484617	-1.90818	0.0563683	0.126279	Not	ALKBH5-PB.2123.2-Anno	Annotated	461.804	285.899	29.8112	18.0231	46.3086	24.1104	35.3832	24.4326	18.8214	17.4855	22.5626	3.39637	31.0001	15.6711
PB.2123.3	ENSG00000091542	ALKBH5	ENST00000399138	FSM	957.356	-1.22122	0.323113	-3.77954	0.000157117	0.000828769	Not	ALKBH5-PB.2123.3-Anno	Annotated	1254.13	639.979	90.7672	45.0005	142.823	94.6592	80.0552	68.9816	67.3172	64.7941	50.3082	41.1335	59.0582	9.70847
PB.2123.4	ENSG00000091542	ALKBH5	ENST00000399138	FSM	937.82	-0.098881	0.253426	-0.390177	0.696406	0.812278	Not	ALKBH5-PB.2123.4-Anno	Annotated	965.11	907.305	79.2179	73.2134	45.0734	78.255	70.2133	122.255	80.2932	59.6757	75.107	86.9171	58.82	85.5472
PB.2943.1	ENSG00000003393	ALS2	ENST00000264276	FSM	600.199	-0.0452764	0.104127	-0.434818	0.663694	0.784264	Not	ALS2-PB.2943.1-Anno	Annotated	594.707	607.977	20.4922	20.2763	26.2588	18.6225	20.6641	16.8476	20.0679	19.88	19.18	22.3844	19.6576	20.2796
PB.2943.2	ENSG00000003393	ALS2	ENST00000680287	FSM	111.37	-0.391049	0.259953	-1.50431	0.132502	0.247161	Not	ALS2-PB.2943.2-Anno	Annotated	123.893	99.023	9.30379	7.27702	6.84671	9.54169	12.7893	8.72105	8.6202	7.7604	5.71866	8.38237	8.234	6.28968
PB.4343.1	ENSG00000123505	AMD1	ENST00000368885	FSM	4562.3	-0.923623	0.158929	-5.81153	6.1904e-09	8.33425e-08	Not	AMD1-PB.4343.1-Anno	Annotated	5811.32	3220.35	377.917	204.274	394.453	431.683	303.909	430.008	329.535	187.178	207.636	237.738	195.796	193.022
PB.4343.2	ENSG00000123505	AMD1	ENST00000368882	FSM	329.926	-0.920848	0.106127	-8.67687	4.0681e-18	1.51941e-16	Not	AMD1-PB.4343.2-Anno	Annotated	420.48	237.048	75.7733	41.5111	51.1085	86.0839	97.3314	74.7366	69.6059	27.151	47.4788	55.4497	42.2983	35.1776
PB.1897.1	ENSG00000162066	AMDHD2	novel	NIC	37.2309	-0.393029	0.743221	-0.528819	0.596931	0.727914	Not	AMDHD2-PB.1897.1-novel	novel	43.8012	30.5527	3.21525	2.20424	3.15008	0.932801	6.75963	4.15171	1.08203	4.35683	1.05584	0.866158	2.11184	2.63053
PB.1897.2	ENSG00000162066	AMDHD2	ENST00000293971	FSM	183.249	-0.25244	0.196038	-1.28771	0.197846	0.336131	Not	AMDHD2-PB.1897.2-Anno	Annotated	192.399	173.447	13.7646	12.1099	15.1117	14.1229	14.8839	12.0584	12.6463	13.5592	12.3308	11.9486	14.9222	7.78872
PB.1988.1	ENSG00000159461	AMFR	ENST00000290649	FSM	5860.3	0.361973	0.0984844	3.67543	0.000237445	0.00119014	Not	AMFR-PB.1988.1-Anno	Annotated	5004.91	6792.76	316.634	416.834	340.309	285.619	393.793	279.675	283.773	407.495	379.191	442.146	395.235	460.101
PB.5352.1	ENSG00000101935	AMMECR1	ENST00000262844	FSM	418.292	0.74228	0.219173	3.38674	0.000707296	0.00311381	Not	AMMECR1-PB.5352.1-Anno	Annotated	309.453	537.562	21.8817	36.9163	22.5793	30.268	22.4533	13.6337	20.474	35.2383	30.2235	46.8428	34.6831	37.5937
PB.5352.2	ENSG00000101935	AMMECR1	ENST00000473662	ISM	45.6614	0.330505	0.479658	0.689044	0.490796	0.638733	Not	AMMECR1-PB.5352.2-Anno	Annotated	41.9469	49.6376	2.57749	2.87879	5.91728	1.75873	2.15159	1.07781	1.98203	2.95054	2.23725	2.83423	2.37051	4.00142
PB.3536.1	ENSG00000114019	AMOTL2	ENST00000249883	FSM	2410.83	-0.0410307	0.176431	-0.232559	0.816104	0.888911	Not	AMOTL2-PB.3536.1-Anno	Annotated	2420.44	2412.55	122.701	119.432	81.5221	96.8989	173.387	109.612	152.084	92.8049	129.407	123.718	141.242	109.989
PB.3536.2	ENSG00000114019	AMOTL2	ENST00000249883	FSM	1086.47	-2.19183	1.09692	-1.99816	0.0456993	0.106893	Not	AMOTL2-PB.3536.2-Anno	Annotated	1604.16	578.446	88.6033	29.8176	165.639	70.4903	105.245	44.6353	57.0067	28.628	31.3734	70.4137	18.6293	0.0437599
PB.266.1	ENSG00000116337	AMPD2	ENST00000667949	FSM	382.882	0.21055	0.24841	0.847591	0.396666	0.554119	Not	AMPD2-PB.266.1-Anno	Annotated	351.242	414.927	21.8997	25.0386	30.9969	12.3944	26.9819	23.3135	15.8119	28.8029	23.5525	19.2299	25.3631	28.2445
PB.266.2	ENSG00000116337	AMPD2	ENST00000342115	FSM	628.926	0.109344	0.175424	0.623312	0.53308	0.676897	Not	AMPD2-PB.266.2-Anno	Annotated	587.358	676.473	35.1204	39.2209	43.8138	30.4537	28.897	38.7949	33.6426	40.9457	33.3011	50.5519	40.2067	31.0994
PB.2805.1	ENSG00000153107	ANAPC1	ENST00000341068	FSM	472.766	0.330975	0.170259	1.94395	0.0519011	0.118099	Not	ANAPC1-PB.2805.1-Anno	Annotated	413.647	538.677	11.5875	14.6792	10.992	9.60358	17.2853	10.4787	9.57802	16.13	14.4727	15.0115	13.0276	14.7544
PB.2805.2	ENSG00000153107	ANAPC1	ENST00000341068	FSM	1338.2	0.125284	0.130018	0.96359	0.335251	0.493849	Not	ANAPC1-PB.2805.2-Anno	Annotated	1241.79	1455.57	42.6472	48.5684	40.5027	45.1686	45.6359	39.0769	42.8519	44.6321	40.6586	65.3667	43.6351	48.5496
PB.673.1	ENSG00000166295	ANAPC16	novel	NIC	369.786	-0.465322	0.221741	-2.09849	0.0358618	0.0880637	Not	ANAPC16-PB.673.1-novel	novel	420.165	316.629	45.5402	33.2419	56.3764	32.125	62.7317	37.2471	39.2207	40.0775	31.5053	24.9359	36.6195	33.0715
PB.1661.1	ENSG00000013523	ANGEL1	ENST00000251089	FSM	429.711	-0.322618	0.263745	-1.22322	0.221246	0.366368	Not	ANGEL1-PB.1661.1-Anno	Annotated	463	393.4	25.5479	21.0944	32.009	20.4993	29.9321	17.0936	28.2057	22.5455	23.069	17.3821	28.2686	14.207
PB.483.1	ENSG00000174606	ANGEL2	novel	NIC	946.624	-0.17008	0.118168	-1.4393	0.150064	0.272548	Not	ANGEL2-PB.483.1-novel	novel	976.742	913.122	46.0185	41.8479	53.6568	39.0428	54.4196	39.2417	43.7317	45.3559	39.797	36.7291	44.1019	43.2556
PB.5108.1	ENSG00000136859	ANGPTL2	ENST00000373425	FSM	7325.89	0.0678724	0.122826	0.552592	0.580543	0.71533	Not	ANGPTL2-PB.5108.1-Anno	Annotated	6911	7824	424.344	465.874	451.9	384.356	480.161	441.642	363.664	393.556	540.269	569.805	499.288	326.451
PB.2082.1	ENSG00000185722	ANKFY1	ENST00000341657	FSM	1958.48	-0.24934	0.102547	-2.43146	0.0150381	0.0430519	Not	ANKFY1-PB.2082.1-Anno	Annotated	2079	1839.6	60.4092	51.9116	70.5644	48.6458	73.4174	55.1167	54.3019	51.7088	51.8081	53.2972	57.792	44.9521
PB.3905.1	ENSG00000154122	ANKH	ENST00000284268	FSM	1198.44	-0.105168	0.13866	-0.758457	0.448177	0.602572	Not	ANKH-PB.3905.1-Anno	Annotated	1210.07	1182.06	82.8776	79.5971	65.4271	97.5736	90.0667	85.6409	75.6798	81.5797	84.2147	78.1716	94.0457	59.9739
PB.3905.2	ENSG00000154122	ANKH	ENST00000284268	FSM	143.585	-0.557371	1.24888	-0.446296	0.655384	0.776666	Not	ANKH-PB.3905.2-Anno	Annotated	186.53	99.7355	14.2715	6.96666	59.258	2.41491	2.29219	7.38286	0.00965482	19.9106	5.48807	9.40846	0.0262047	0
PB.1391.1	ENSG00000176915	ANKLE2	ENST00000357997	FSM	1101.83	1.02393	0.149065	6.86903	6.46379e-12	1.27932e-10	Not	ANKLE2-PB.1391.1-Anno	Annotated	698.539	1535.67	34.9055	74.362	39.1536	35.4228	34.891	31.0907	33.9694	77.9741	67.0809	87.1614	51.1936	88.3997
PB.1391.2	ENSG00000176915	ANKLE2	novel	NIC	63.7975	0.537002	0.879631	0.610486	0.54154	0.685236	Not	ANKLE2-PB.1391.2-novel	novel	68.1279	62.3898	3.94113	3.48482	2.4445	2.65699	9.252	5.35214	0	3.52016	4.55989	5.50975	2.4868	1.34749
PB.1391.3	ENSG00000176915	ANKLE2	ENST00000357997	FSM	612.787	0.711503	0.232561	3.05943	0.0022176	0.00838174	Not	ANKLE2-PB.1391.3-Anno	Annotated	452.133	784.744	34.436	58.0744	40.55	41.0902	24.1782	30.077	36.2843	59.8967	41.8418	70.8461	51.8002	65.9873
PB.1335.1	ENSG00000076513	ANKRD13A	ENST00000261739	FSM	1187.81	0.638184	0.154751	4.12395	3.72429e-05	0.00022903	Not	ANKRD13A-PB.1335.1-Anno	Annotated	907.2	1496	51.5175	82.5723	54.2713	62.8253	54.087	42.9187	43.4852	85.9327	69.0695	103.463	73.3197	81.0766
PB.191.1	ENSG00000118454	ANKRD13C	ENST00000370944	FSM	604.838	0.140121	0.127797	1.09644	0.272888	0.42726	Not	ANKRD13C-PB.191.1-Anno	Annotated	559.188	662.65	30.5073	34.8899	36.548	30.0497	34.5654	25.6708	25.7024	35.1834	28.4608	48.193	31.0021	31.6102
PB.191.2	ENSG00000118454	ANKRD13C	novel	NIC	107.309	0.974983	0.846961	1.15116	0.249668	0.400565	Not	ANKRD13C-PB.191.2-novel	novel	89.0043	125.217	5.7486	8.05796	3.75486e-05	6.77533	5.75319	6.09015	10.1243	3.94956	11.3042	7.09129	10.9894	6.95543
PB.191.3	ENSG00000118454	ANKRD13C	ENST00000370944	ISM	395.587	-0.0686577	0.207848	-0.330327	0.741153	0.847537	Not	ANKRD13C-PB.191.3-Anno	Annotated	394.332	395.101	37.9988	36.9332	47.9653	28.5754	46.6172	28.9583	37.8778	43.0617	36.0923	27.8808	44.1078	33.5233
PB.2513.1	ENSG00000105186	ANKRD27	novel	NIC	152.463	-0.176592	0.279216	-0.632455	0.52709	0.671471	Not	ANKRD27-PB.2513.1-novel	novel	158.547	146.442	8.22306	7.37443	10.5827	11.1821	5.63194	7.06056	6.65794	7.95953	7.37497	9.4743	6.48617	5.57717
PB.2513.2	ENSG00000105186	ANKRD27	ENST00000306065	FSM	540.813	-0.277167	0.150475	-1.84195	0.0654832	0.142027	Not	ANKRD27-PB.2513.2-Anno	Annotated	577.853	503.158	28.654	24.3507	24.1141	30.8297	33.4137	30.8177	24.0949	20.2781	23.7129	27.208	22.4731	28.0813
PB.3318.1	ENSG00000206560	ANKRD28	ENST00000683139	FSM	2937.18	0.747216	0.170479	4.38305	1.1703e-05	8.15457e-05	Not	ANKRD28-PB.3318.1-Anno	Annotated	2132.4	3810.8	69.7622	121.386	63.3166	62.9447	58.6453	78.2476	85.6571	97.6293	107.745	157.967	112.179	131.411
PB.395.1	ENSG00000214262	ANKRD36BP1	ENST00000358576	FSM	1749.13	-0.140447	0.0643505	-2.18254	0.0290698	0.0743275	Not	ANKRD36BP1-PB.395.1-Anno	Annotated	1786.9	1713.07	239.783	222.979	243.785	174.885	265.556	246.678	268.009	214.981	184.385	241.195	237.297	237.035
PB.395.2	ENSG00000214262	ANKRD36BP1	ENST00000358576	FSM	195.177	1.37571	1.10345	1.24674	0.212492	0.354766	Not	ANKRD36BP1-PB.395.2-Anno	Annotated	150.779	245.933	23.9057	38.8611	0.000346439	60.57	38.607	19.2306	1.12044	66.8688	55.1022	52.5555	7.05101	12.7279
PB.3374.1	ENSG00000160746	ANO10	ENST00000292246	ISM	474.754	0.45595	0.120024	3.79884	0.000145377	0.000771531	Not	ANO10-PB.3374.1-Anno	Annotated	389.8	567.6	35.2036	49.3877	43.9586	29.5045	37.1083	29.0847	36.3619	45.6573	48.237	57.4714	44.9378	50.6348
PB.1830.1	ENSG00000140350	ANP32A	ENST00000465139	FSM	912.691	-0.0402888	0.0999913	-0.402924	0.687004	0.803742	Not	ANP32A-PB.1830.1-Anno	Annotated	901.4	928	131.342	130.995	146.235	108.933	164.626	120.024	116.891	155.72	118.796	133.025	135.119	112.315
PB.329.1	ENSG00000143401	ANP32E	ENST00000583931	FSM	490.136	0.952888	0.218301	4.36502	1.27114e-05	8.78667e-05	Not	ANP32E-PB.329.1-Anno	Annotated	324.925	662.856	21.2225	42.2659	16.558	18.6392	15.0991	21.5131	34.3032	37.8068	35.3136	44.948	27.7921	65.4689
PB.329.2	ENSG00000143401	ANP32E	ENST00000583931	FSM	1766.07	-0.0194995	0.157214	-0.124031	0.90129	0.940271	Not	ANP32E-PB.329.2-Anno	Annotated	1726.48	1816.54	116.618	119.737	108.294	112.719	103.88	139.698	118.498	108.758	102.12	155.722	129.85	102.235
PB.1868.3	ENSG00000166825	ANPEP	ENST00000560137	FSM	852.275	-0.36298	0.262172	-1.38451	0.166203	0.294802	Not	ANPEP-PB.1868.3-Anno	Annotated	949.61	743.765	55.6374	42.4207	67.2397	29.8178	38.5799	69.9398	72.6095	50.4489	42.1267	44.6433	42.6905	32.1942
PB.1868.4	ENSG00000166825	ANPEP	ENST00000679248	ISM	1347.09	1.5707	1.35575	1.15854	0.246642	0.396723	Not	ANPEP-PB.1868.4-Anno	Annotated	801.695	1937.56	63.9898	152.715	1.30367e-08	47.9158	101.925	73.5349	96.5726	166.074	106.829	175.769	108.871	206.031
PB.2739.5	ENSG00000169604	ANTXR1	ENST00000303714	FSM	1136.6	-2.18216	0.337608	-6.46357	1.0226e-10	1.73693e-09	Down	ANTXR1-PB.2739.5-Anno	Annotated	1797.24	442.281	69.9018	16.5939	91.7597	50.1204	84.0297	75.822	47.777	8.66992	28.8325	12.8796	15.948	16.6396
PB.2739.1	ENSG00000169604	ANTXR1	ENST00000303714	FSM	1751.64	-1.083	0.260853	-4.15177	3.29914e-05	0.000205737	Not	ANTXR1-PB.2739.1-Anno	Annotated	2245.26	1206.34	86.6491	45.6698	118.008	62.7343	83.8429	101.218	67.4429	46.6425	60.3947	22.9127	74.0736	24.3254
PB.2739.2	ENSG00000169604	ANTXR1	novel	NIC	85.613	-0.398715	0.266073	-1.49852	0.133998	0.249366	Not	ANTXR1-PB.2739.2-novel	novel	93.4643	76.4092	11.5675	9.1968	16.0258	7.07017	10.995	12.5484	11.1983	9.85889	5.49461	6.38973	13.598	10.6428
PB.2739.3	ENSG00000169604	ANTXR1	ENST00000303714	FSM	6146.08	-0.65335	0.153628	-4.25279	2.11119e-05	0.000137713	Not	ANTXR1-PB.2739.3-Anno	Annotated	7340.9	4889.87	290.37	189.169	265.113	218.779	356.087	395.258	216.611	130.708	206.3	188.022	254.667	166.147
PB.2739.4	ENSG00000169604	ANTXR1	ENST00000303714	ISM	926.281	-0.0558507	0.145001	-0.385175	0.700108	0.815406	Not	ANTXR1-PB.2739.4-Anno	Annotated	914.102	932.317	61.2243	60.9984	63.5061	54.3736	69.7606	56.0941	62.387	70.6676	64.5356	46.9541	61.6473	61.1872
PB.3763.1	ENSG00000163297	ANTXR2	ENST00000403729	FSM	788.835	-0.546325	0.193648	-2.82123	0.00478401	0.016149	Not	ANTXR2-PB.3763.1-Anno	Annotated	914.86	658.292	38.355	26.8044	36.1592	25.1564	43.3389	45.4603	41.6602	25.2142	25.5242	30.5319	20.3942	32.3573
PB.3763.2	ENSG00000163297	ANTXR2	ENST00000403729	FSM	1264.76	-0.355284	0.13451	-2.64131	0.00825851	0.0258315	Not	ANTXR2-PB.3763.2-Anno	Annotated	1394.88	1141.91	80.232	63.8599	66.1316	59.1109	103.349	95.0432	77.5247	57.0943	59.4599	81.9386	60.3382	60.4687
PB.3763.3	ENSG00000163297	ANTXR2	ENST00000403729	FSM	12.1946	-0.95464	3.10024	-0.307925	0.75814	0.860201	Not	ANTXR2-PB.3763.3-Anno	Annotated	23.6633	0	2.93868	0	14.6934	0	0	0	0	0	0	0	0	0
PB.691.1	ENSG00000122359	ANXA11	ENST00000422982	FSM	2046.9	-0.282494	0.138424	-2.04078	0.0412723	0.0985287	Not	ANXA11-PB.691.1-Anno	Annotated	2188.4	1906.8	216.999	182.936	248.085	166.876	253.822	188.168	228.045	190.593	189.006	199.734	194.111	141.235
PB.1799.1	ENSG00000182718	ANXA2	novel	NIC	7428.32	0.052698	0.0678074	0.777171	0.437058	0.592437	Not	ANXA2-PB.1799.1-novel	novel	7094.32	7842.17	519.365	556.615	544.785	448.228	586.596	511.425	505.789	526.345	493.688	679.837	548.324	534.88
PB.1799.2	ENSG00000182718	ANXA2	novel	NIC	9067.26	0.23914	0.11981	1.996	0.0459342	0.10737	Not	ANXA2-PB.1799.2-novel	novel	8068.78	10228.6	661.652	814.16	589.204	599.784	735.808	678.212	705.253	728.614	676.936	1084.49	727.226	853.536
PB.1799.3	ENSG00000182718	ANXA2	ENST00000560546	FSM	856.403	-0.220323	0.16367	-1.34614	0.178257	0.311223	Not	ANXA2-PB.1799.3-Anno	Annotated	893.249	809.235	67.4837	59.2169	96.3682	56.4636	63.8786	56.37	64.3381	56.3606	56.5179	44.8811	69.1822	69.1426
PB.4141.1	ENSG00000197043	ANXA6	ENST00000354546	FSM	3644.41	0.805163	0.108636	7.4116	1.24787e-13	3.05245e-12	Not	ANXA6-PB.4141.1-Anno	Annotated	2599.8	4788.4	203.297	362.045	210.921	145.054	243.101	177.124	240.284	373.27	326.526	438.891	319.024	352.515
PB.675.1	ENSG00000138279	ANXA7	ENST00000372921	ISM	1037.33	-0.0166468	0.0970221	-0.171578	0.86377	0.917248	Not	ANXA7-PB.675.1-Anno	Annotated	1017.47	1060.46	133.568	134.357	163.359	108.81	149.605	104.064	142.004	148.479	127.379	138.955	132.742	124.228
PB.2925.1	ENSG00000138356	AOX1	ENST00000374700	FSM	379.992	-2.06728	0.438822	-4.71097	2.46546e-06	2.01099e-05	Down	AOX1-PB.2925.1-Anno	Annotated	571.224	184.124	27.9543	8.63504	29.8437	42.2534	29.9072	15.7275	22.0398	10.7812	7.02754	17.2336	1.04195	7.09099
PB.2925.2	ENSG00000138356	AOX1	ENST00000374700	FSM	1223.27	-1.02931	0.235219	-4.37596	1.20901e-05	8.399e-05	Not	AOX1-PB.2925.2-Anno	Annotated	1563.45	852.983	69.5481	37.2433	59.7141	56.2881	78.8628	76.6706	76.2049	24.1532	53.4679	26.1192	54.7569	27.7193
PB.2925.3	ENSG00000138356	AOX1	ENST00000374700	ISM	68.5994	-0.40541	1.78585	-0.227013	0.820414	0.891631	Not	AOX1-PB.2925.3-Anno	Annotated	70.671	62.1963	3.9335	3.56138	0	2.59967	0	8.49619	8.57163	4.42839	0	0	4.92462	8.4539
PB.2925.4	ENSG00000138356	AOX1	ENST00000374700	ISM	65.999	-0.103121	2.3631	-0.0436379	0.965193	0.981296	Not	AOX1-PB.2925.4-Anno	Annotated	90.8525	35.8311	5.36868	2.13355	0	17.7895	2.64178e-05	2.53935e-06	9.05385	0.00109252	6.05119e-06	9.15696e-06	0.170425	10.4962
PB.2925.5	ENSG00000138356	AOX1	ENST00000374700	ISM	444.139	-0.516118	0.37541	-1.37481	0.16919	0.29915	Not	AOX1-PB.2925.5-Anno	Annotated	513.896	382.798	30.3303	21.7913	15.4147	20.2489	39.3079	25.6537	51.0264	14.2894	22.6406	41.9925	19.8908	10.1431
PB.2925.6	ENSG00000138356	AOX1	ENST00000465297	ISM	98.0565	0.709111	1.27032	0.558215	0.576698	0.712139	Not	AOX1-PB.2925.6-Anno	Annotated	102.304	90.0682	7.4238	6.48998	8.40712	0	0.868726	25.8704	1.97278	0.192966	10.8976	4.68093	13.1945	3.48388
PB.3213.1	ENSG00000100280	AP1B1	ENST00000432560	FSM	1428.25	0.631606	0.102319	6.1729	6.70496e-10	1.0104e-08	Not	AP1B1-PB.3213.1-Anno	Annotated	1087.4	1794.8	61.2187	98.3654	66.1598	62.1755	63.8065	54.6038	59.3479	115.346	91.5925	110.453	93.1055	81.3307
PB.2036.1	ENSG00000166747	AP1G1	ENST00000299980	FSM	2439.35	0.101662	0.142654	0.712648	0.476064	0.625892	Not	AP1G1-PB.2036.1-Anno	Annotated	2297.4	2596.8	136.12	149.94	137.954	171.209	128.506	117.378	125.554	152.131	138.059	177.99	137.938	143.583
PB.2482.1	ENSG00000072958	AP1M1	ENST00000589991	FSM	137.354	-0.0465498	0.250391	-0.185908	0.852517	0.909185	Not	AP1M1-PB.2482.1-Anno	Annotated	135.934	138.392	15.9507	15.7796	18.128	10.9301	20.9943	14.2134	15.4877	19.8673	13.7355	12.1652	17.5765	15.5532
PB.2482.2	ENSG00000072958	AP1M1	novel	NIC	548.728	0.297785	0.124522	2.39142	0.0167833	0.0472421	Not	AP1M1-PB.2482.2-novel	novel	483.007	624.748	33.5163	41.8838	36.1436	24.0571	45.0106	29.3414	33.029	42.4418	41.1484	49.9012	39.6786	36.2488
PB.2972.1	ENSG00000152056	AP1S3	ENST00000396654	FSM	675.782	-0.178539	0.143114	-1.24753	0.212204	0.354455	Not	AP1S3-PB.2972.1-Anno	Annotated	698.87	649.928	69.4728	62.5656	91.1597	51.5419	81.9516	60.0073	62.7036	73.0925	51.7184	52.029	68.1459	67.8424
PB.822.3	ENSG00000183020	AP2A2	ENST00000448903	FSM	34.8606	9.22007	3.02295	3.05002	0.00228825	0.00862533	Up	AP2A2-PB.822.3-Anno	Annotated	39.2507	33.1604	2.97505	2.14224	14.8637	0.000372515	0.00918945	0.00015038	0.00187158	0.0085274	0.011978	7.45984	1.49537	1.7355
PB.822.1	ENSG00000183020	AP2A2	ENST00000332231	FSM	312.513	-0.299249	0.22634	-1.32212	0.186128	0.320932	Not	AP2A2-PB.822.1-Anno	Annotated	336.196	287.804	16.2367	13.3965	23.5405	12.3651	16.3455	15.3962	13.5364	10.664	16.1998	13.7417	14.7464	11.6306
PB.822.2	ENSG00000183020	AP2A2	ENST00000448903	FSM	999.286	-0.204249	0.0983727	-2.07628	0.037868	0.091972	Not	AP2A2-PB.822.2-Anno	Annotated	1044.15	955.353	71.7722	63.974	73.832	61.3105	88.2718	74.1736	61.2733	70.5255	62.5675	65.7818	68.4681	52.5269
PB.2160.1	ENSG00000006125	AP2B1	ENST00000621914	FSM	1667.82	0.268802	0.12409	2.16619	0.030297	0.076815	Not	AP2B1-PB.2160.1-Anno	Annotated	1472.67	1882.24	56.301	70.2801	49.6524	49.9245	58.0988	65.465	58.3641	66.0631	54.395	84.1002	70.9466	75.8956
PB.2160.2	ENSG00000006125	AP2B1	ENST00000610402	FSM	1690.76	-0.21076	0.25555	-0.82473	0.409525	0.567223	Not	AP2B1-PB.2160.2-Anno	Annotated	1738.21	1673.34	66.9524	62.0383	74.7556	53.5788	91.6468	48.6178	66.1631	55.2985	79.4608	85.2514	62.6345	27.5463
PB.2160.3	ENSG00000006125	AP2B1	ENST00000621914	FSM	9.20029	2.20754	3.04952	0.723895	0.46913	0.620534	Not	AP2B1-PB.2160.3-Anno	Annotated	7.80378e-08	19.9746	4.96787e-09	1.26178	0	0	0	2.48393e-08	0	1.14519e-07	0	2.96571	0	3.34319
PB.2160.4	ENSG00000006125	AP2B1	ENST00000610402	FSM	72.7091	2.24352	3.04289	0.737301	0.460939	0.613203	Not	AP2B1-PB.2160.4-Anno	Annotated	2.05127e-05	150.515	1.29539e-06	9.55388	0	0	1.32473e-08	6.46372e-06	0	5.89956e-05	0	11.7909	0	35.9784
PB.2160.5	ENSG00000006125	AP2B1	novel	NIC	226.206	0.623361	0.61617	1.01167	0.311696	0.469911	Not	AP2B1-PB.2160.5-novel	novel	178.506	285.466	11.7824	18.4827	1.49464	14.871	16.4212	12.1473	13.9778	23.2494	12.2477	34.9264	9.4162	12.5739
PB.2160.6	ENSG00000006125	AP2B1	ENST00000621914	ISM	60.1255	-3.36396	2.19318	-1.53383	0.125072	0.236816	Not	AP2B1-PB.2160.6-Anno	Annotated	105.211	10.6667	4.80736	0.489245	11.5161	10.6591	0	0	1.86162	2.44622	0	0	5.2319e-07	0
PB.4004.1	ENSG00000132842	AP3B1	ENST00000255194	FSM	1835.6	0.765673	0.10125	7.56219	3.96329e-14	1.02353e-12	Not	AP3B1-PB.4004.1-Anno	Annotated	1320.81	2392.96	73.6847	129.836	70.3769	70.2714	78.0379	69.265	80.4721	128.391	112.004	154.689	114.539	139.56
PB.4004.2	ENSG00000132842	AP3B1	ENST00000695540	ISM	62.9829	-0.368487	0.305254	-1.20715	0.227375	0.373687	Not	AP3B1-PB.4004.2-Anno	Annotated	69.1949	56.4387	9.46764	7.45219	14.5165	6.95602	8.699	12.0023	5.16445	7.87841	5.56906	9.08745	10.2632	4.46285
PB.681.2	ENSG00000185009	AP3M1	ENST00000372745	FSM	204.961	0.310099	0.366334	0.846494	0.397277	0.554751	Not	AP3M1-PB.681.2-Anno	Annotated	190.389	223.599	12.4301	13.8345	23.7417	3.80868	13.1666	11.704	9.72944	10.9282	10.8897	17.9022	15.5235	13.9289
PB.681.3	ENSG00000185009	AP3M1	ENST00000355264	FSM	121.219	1.32301	0.569752	2.32208	0.0202285	0.0550225	Not	AP3M1-PB.681.3-Anno	Annotated	78.1884	171.795	5.31976	11.1335	7.08719	5.72762	11.0418	1.29635	1.44583	9.29012	5.73237	17.5939	14.5215	8.52975
PB.4781.1	ENSG00000070718	AP3M2	ENST00000518421	FSM	114.111	-0.0990628	0.400258	-0.247497	0.804523	0.882468	Not	AP3M2-PB.4781.1-Anno	Annotated	129.022	102.57	8.32421	6.1878	18.9345	6.16972	12.2297	2.87808	1.40905	9.08331	4.88943	9.80395	3.43654	3.72577
PB.4781.2	ENSG00000070718	AP3M2	ENST00000396926	FSM	178.025	0.833142	0.865394	0.962731	0.335683	0.494321	Not	AP3M2-PB.4781.2-Anno	Annotated	155.978	200.43	9.77466	12.4793	1.52055e-05	9.7424	13.8274	11.3742	13.9293	6.78409	15.3051	11.2641	16.7644	12.2787
PB.1771.1	ENSG00000081014	AP4E1	ENST00000261842	FSM	660.512	0.585272	0.116674	5.01629	5.26795e-07	4.8344e-06	Not	AP4E1-PB.1771.1-Anno	Annotated	516.41	819.857	16.688	25.7628	15.8459	17.0897	21.2266	14.0525	15.2255	27.2935	22.1719	31.0765	22.4591	25.8132
PB.959.1	ENSG00000254470	AP5B1	ENST00000532090	FSM	217.325	-0.183771	0.237967	-0.772253	0.439965	0.594862	Not	AP5B1-PB.959.1-Anno	Annotated	227.8	207.4	16.0659	14.1519	21.5675	10.8984	22.8999	12.4928	12.4708	16.8949	13.1014	12.4773	17.6335	10.6523
PB.1608.1	ENSG00000053770	AP5M1	ENST00000261558	FSM	229.82	-0.230483	0.402586	-0.572505	0.56698	0.704816	Not	AP5M1-PB.1608.1-Anno	Annotated	256.588	204.058	18.7474	14.6277	4.70753	17.2524	30.9255	18.9278	21.9236	13.9487	15.8245	17.1004	11.5576	14.707
PB.1608.2	ENSG00000053770	AP5M1	ENST00000261558	FSM	467.921	0.578468	0.23066	2.50789	0.0121455	0.0359501	Not	AP5M1-PB.1608.2-Anno	Annotated	373.452	570.542	28.896	42.3989	46.2124	33.3841	23.4881	19.1166	22.2789	41.1658	37.5212	50.4024	39.4718	43.4332
PB.1608.3	ENSG00000053770	AP5M1	ENST00000261558	FSM	5.55118	-0.951251	3.10127	-0.30673	0.759049	0.860214	Not	AP5M1-PB.1608.3-Anno	Annotated	10.7595	4.14341e-06	0.921744	2.95273e-07	4.60872	0	0	0	0	0	0	1.47637e-06	0	0
PB.3030.1	ENSG00000125843	AP5S1	ENST00000615891	FSM	174.454	0.00922255	0.20514	0.0449573	0.964141	0.980789	Not	AP5S1-PB.3030.1-Anno	Annotated	169.158	179.807	27.4638	28.205	33.0657	21.9907	33.4388	20.8498	27.9741	35.546	28.8806	23.6652	27.1943	25.7392
PB.4435.1	ENSG00000242802	AP5Z1	ENST00000649063	FSM	360.003	-0.0278604	0.10144	-0.274649	0.783586	0.871808	Not	AP5Z1-PB.4435.1-Anno	Annotated	352.6	366.2	28.0611	28.2778	37.5249	26.0655	28.3178	23.0056	25.3916	37.1775	27.5058	24.7102	25.9373	26.0584
PB.1298.1	ENSG00000120868	APAF1	ENST00000551964	FSM	1395.78	0.255361	0.111802	2.28404	0.0223692	0.0598839	Not	APAF1-PB.1298.1-Anno	Annotated	1240.11	1570.56	37.1501	45.7349	38.2456	38.5743	43.6891	31.6088	33.6325	45.0324	38.531	53.1442	42.0429	49.9242
PB.3712.1	ENSG00000163697	APBB2	ENST00000510925	ISM	2031.8	-0.727352	0.0942195	-7.71976	1.1655e-14	3.21299e-13	Not	APBB2-PB.3712.1-Anno	Annotated	2481.4	1575.4	124.287	76.4232	136.564	91.8243	158.518	122.841	111.689	72.8972	72.1904	88.5651	77.9067	70.5568
PB.4048.1	ENSG00000134982	APC	novel	NIC	576.887	-0.186749	0.108312	-1.72418	0.0846752	0.174138	Not	APC-PB.4048.1-novel	novel	600.991	554.89	40.716	36.4542	40.1614	33.0777	52.6916	34.1608	43.4884	33.5133	35.6621	39.7918	37.2833	36.0206
PB.4048.2	ENSG00000134982	APC	ENST00000257430	FSM	288.626	-0.2043	0.224834	-0.908668	0.363525	0.521456	Not	APC-PB.4048.2-Anno	Annotated	302.009	274.11	20.9181	18.6042	17.5516	25.546	24.5477	20.1788	16.7662	20.8963	18.0525	17.2214	15.4589	21.3921
PB.900.1	ENSG00000166181	API5	ENST00000531273	FSM	1364.83	0.238797	0.13263	1.80047	0.0717861	0.152741	Not	API5-PB.900.1-Anno	Annotated	1227.33	1522.03	73.1922	88.4918	59.4998	76.5577	94.6755	65.9928	69.2353	89.5593	76.0705	104.265	81.1754	91.3887
PB.900.2	ENSG00000166181	API5	novel	NIC	392.977	0.498676	0.146317	3.40819	0.00065396	0.00291409	Not	API5-PB.900.2-novel	novel	315.185	476.897	18.5051	27.2486	17.9784	18.3593	18.7647	18.106	19.3172	24.6912	31.2757	31.9686	27.5073	20.8002
PB.900.3	ENSG00000166181	API5	ENST00000534600	ISM	588.63	-0.156799	0.105482	-1.4865	0.137146	0.253797	Not	API5-PB.900.3-Anno	Annotated	602.561	573.584	59.3372	54.8458	69.6408	56.2083	63.5711	53.0767	54.1891	60.3515	44.83	54.6342	56.784	57.6292
PB.1077.1	ENSG00000084234	APLP2	ENST00000338167	FSM	3879.01	0.0284002	0.130663	0.217355	0.827932	0.89645	Not	APLP2-PB.1077.1-Anno	Annotated	3724.36	4099.44	223.884	239.397	215.133	218.72	257.507	239.917	188.143	247.347	212.954	334.855	222.855	178.975
PB.1077.2	ENSG00000084234	APLP2	novel	NIC	2293.15	0.0351597	0.226782	0.155037	0.876792	0.925555	Not	APLP2-PB.1077.2-novel	novel	2189.83	2416.77	136.682	146.8	146.271	125.341	113.142	168.172	130.484	180.062	134.16	193.671	110.446	115.659
PB.1077.3	ENSG00000084234	APLP2	ENST00000528499	FSM	2228.37	-0.00883088	0.282067	-0.0313077	0.975024	0.985809	Not	APLP2-PB.1077.3-Anno	Annotated	2146.94	2341.08	136.725	143.426	161.538	134.063	162.756	80.6824	144.585	70.4108	144.629	185.071	184.494	132.526
PB.1077.4	ENSG00000084234	APLP2	ENST00000338167	FSM	88.7931	2.65211	1.50352	1.76393	0.0777441	0.162443	Not	APLP2-PB.1077.4-Anno	Annotated	50.7833	123.303	4.28581	10.5379	2.5665e-07	15.8669	2.33568e-05	2.92609	2.63602	2.48304	23.4198	0.490213	0	26.2963
PB.1077.5	ENSG00000084234	APLP2	ENST00000528499	FSM	170.422	2.74226	2.28557	1.19981	0.230212	0.377278	Not	APLP2-PB.1077.5-Anno	Annotated	154.492	187.389	14.2538	16.9296	1.67871e-07	0.278362	2.24934e-06	34.1078	36.883	0.772104	1.45944	29.3642	0	53.0525
PB.1077.6	ENSG00000084234	APLP2	novel	NIC	579.143	-0.147407	0.316532	-0.465694	0.641434	0.764724	Not	APLP2-PB.1077.6-novel	novel	603.676	553.229	39.598	35.5346	23.5195	29.1548	42.6426	60.1464	42.5269	31.8735	44.0845	39.1828	22.4146	40.1178
PB.1077.8	ENSG00000084234	APLP2	ENST00000528499	ISM	64.0861	5.82535	2.42226	2.40493	0.0161756	0.0457541	Up	APLP2-PB.1077.8-Anno	Annotated	44.3215	81.1357	2.85815	5.58184	0	0.000722149	0	14.217	0.0730493	24.6177	0.0153067	0.102666	0.000323297	3.17318
PB.3243.1	ENSG00000244509	APOBEC3C	ENST00000361441	FSM	371.748	-0.166164	0.174709	-0.951094	0.341557	0.499712	Not	APOBEC3C-PB.3243.1-Anno	Annotated	382.8	365.4	85.2773	78.4145	84.4999	63.185	123.317	74.0215	81.3628	72.9014	72.0099	100.625	95.0249	51.5111
PB.3141.3	ENSG00000142192	APP	ENST00000357903	FSM	419.651	2.49519	0.997875	2.5005	0.0124018	0.0366618	Up	APP-PB.3141.3-Anno	Annotated	301.303	547.87	19.3288	34.5627	0.859994	11.7188	76.8936	3.53068	3.64108	22.422	31.1894	11.7074	81.1816	26.313
PB.3141.1	ENSG00000142192	APP	ENST00000358918	FSM	2004.99	-0.756313	0.114452	-6.6081	3.89274e-11	6.96981e-10	Not	APP-PB.3141.1-Anno	Annotated	2452.35	1521.91	155.11	93.9815	154.674	109.308	158.11	189.656	163.804	86.8985	81.2854	86.5081	100.811	114.404
PB.3141.2	ENSG00000142192	APP	ENST00000346798	FSM	1164.88	1.41823	0.433343	3.27276	0.00106502	0.00446512	Not	APP-PB.3141.2-Anno	Annotated	702.948	1664.98	42.8069	100.451	8.14615	87.8303	42.0797	27.7845	48.1938	95.7963	139.398	133.197	79.7649	54.1008
PB.3141.4	ENSG00000142192	APP	ENST00000346798	FSM	9069.77	-0.445809	0.0839669	-5.30934	1.10025e-07	1.1832e-06	Not	APP-PB.3141.4-Anno	Annotated	10200.1	7938.86	688.836	520.098	713.31	536.677	792.993	736.071	665.129	479.481	472.905	628.562	534.297	485.244
PB.3141.5	ENSG00000142192	APP	novel	NIC	8.08637	-3.58859	3.04685	-1.1778	0.238875	0.387635	Not	APP-PB.3141.5-novel	novel	15.3654	9.09317e-06	1.04317	6.466e-07	0.764129	0.000119173	0.138987	4.2972	0.0154005	3.01763e-06	7.94016e-08	6.69275e-09	6.30627e-08	6.62105e-08
PB.3141.6	ENSG00000142192	APP	ENST00000357903	FSM	4960.59	0.304147	0.151502	2.00755	0.0446912	0.104825	Not	APP-PB.3141.6-Anno	Annotated	4330.93	5606.11	297.428	376.293	320.703	371.425	228.359	276.896	289.755	431.498	386.334	397.83	355.154	310.649
PB.3141.7	ENSG00000142192	APP	ENST00000348990	FSM	418.014	0.763858	0.451328	1.69247	0.0905572	0.183948	Not	APP-PB.3141.7-Anno	Annotated	325.836	521.532	23.2174	36.6885	4.47951	25.9447	28.5098	28.8427	28.3103	37.7888	27.5871	50.6388	28.7317	38.6958
PB.2251.1	ENSG00000062725	APPBP2	ENST00000083182	FSM	810.515	-0.098599	0.103758	-0.950278	0.341971	0.500036	Not	APPBP2-PB.2251.1-Anno	Annotated	815.637	808.891	43.4508	41.7483	51.1883	42.1948	45.8228	36.4578	41.5902	39.283	36.6957	48.4115	42.13	42.2214
PB.2251.3	ENSG00000062725	APPBP2	ENST00000083182	FSM	256.832	0.187295	0.25113	0.745808	0.455783	0.608792	Not	APPBP2-PB.2251.3-Anno	Annotated	229.363	291.109	25.277	30.8527	23.8544	20.817	29.1239	27.2613	25.3284	21.609	33.7346	46.7195	19.5876	32.6125
PB.2249.1	ENSG00000259349	APPBP2-DT	ENST00000691821	FSM	349.125	-0.235561	0.225587	-1.04421	0.296387	0.453082	Not	RP11-15E18.1-PB.2249.1-Anno	Annotated	364.725	330.677	66.3789	58.4627	72.6995	53.6317	86.7825	56.3936	62.3873	69.4912	46.3191	41.1236	72.1357	63.2439
PB.3424.1	ENSG00000157500	APPL1	ENST00000288266	FSM	855.375	-0.728941	0.222808	-3.27162	0.00106934	0.00447784	Not	APPL1-PB.3424.1-Anno	Annotated	1059.66	633.271	39.1347	22.4872	79.3338	36.1963	34.1976	21.7754	24.1703	29.6403	27.9114	13.8644	21.7417	19.2782
PB.3424.2	ENSG00000157500	APPL1	ENST00000288266	FSM	1430.97	0.240754	0.313033	0.7691	0.441834	0.596164	Not	APPL1-PB.3424.2-Anno	Annotated	1369.17	1510.37	49.9066	54.2456	12.4028	42.5671	64.3091	65.6483	64.6056	41.6206	45.2629	72.362	60.6272	51.3551
PB.1314.1	ENSG00000136044	APPL2	ENST00000258530	FSM	818.759	-0.0792494	0.0979218	-0.809313	0.418335	0.574683	Not	APPL2-PB.1314.1-Anno	Annotated	818.478	820.74	58.9936	57.7451	55.0844	53.3473	64.6174	60.3253	61.5936	59.63	46.4274	62.2189	61.88	58.5693
PB.1314.2	ENSG00000136044	APPL2	ENST00000258530	FSM	53.0778	2.01525	2.21219	0.910974	0.362309	0.520141	Not	APPL2-PB.1314.2-Anno	Annotated	20.2774	92.4868	1.63962	7.36533	0	8.19809	3.59795e-06	0	2.3406e-06	4.82827e-05	15.9307	20.7506	0	0.145338
PB.1314.3	ENSG00000136044	APPL2	ENST00000258530	FSM	149.519	-0.615115	0.395756	-1.55428	0.120118	0.229311	Not	APPL2-PB.1314.3-Anno	Annotated	170.893	124.13	14.0818	10.1011	12.852	9.71951	15.8292	13.6043	18.404	14.3293	8.48104	3.46864	12.5372	11.6893
PB.1314.4	ENSG00000136044	APPL2	ENST00000551662	FSM	52.1794	-0.393252	0.569169	-0.690923	0.489614	0.638201	Not	APPL2-PB.1314.4-Anno	Annotated	56.1912	48.9718	4.94586	4.00625	10.8456	2.44214	5.38332	2.25153	3.80675	3.49926	2.9447	5.65192	0.793934	7.14144
PB.4486.1	ENSG00000240583	AQP1	ENST00000311813	FSM	7090.23	-1.20174	0.231119	-5.19966	1.99658e-07	2.02486e-06	Not	AQP1-PB.4486.1-Anno	Annotated	9555.2	4471.6	798.477	361.816	1040.83	542.353	872.941	857.26	679.005	271.784	462.994	316.402	488.105	269.795
PB.1720.1	ENSG00000021776	AQR	ENST00000156471	FSM	298.319	-0.224356	0.191841	-1.16949	0.242206	0.391759	Not	AQR-PB.1720.1-Anno	Annotated	309.576	283.565	11.4355	10.2755	10.2278	13.2096	11.0536	10.323	12.3637	10.0467	8.47522	8.55685	9.37634	14.9224
PB.1720.2	ENSG00000021776	AQR	ENST00000156471	FSM	1023.37	0.188771	0.089485	2.10952	0.0348994	0.0860654	Not	AQR-PB.1720.2-Anno	Annotated	934.224	1127.23	42.5344	49.6235	48.3783	42.2143	47.8675	29.9242	44.2877	49.7568	47.3592	60.9193	43.088	46.9944
PB.1170.1	ENSG00000134287	ARF3	ENST00000256682	FSM	2240.53	-0.0824188	0.0760857	-1.08324	0.278704	0.43363	Not	ARF3-PB.1170.1-Anno	Annotated	2244.4	2244.8	141.683	137.864	148.033	150.793	157.741	124.148	127.7	132.949	134.764	153.895	147.303	120.411
PB.1579.1	ENSG00000165527	ARF6	ENST00000298316	FSM	786.563	-0.15359	0.223834	-0.686178	0.492601	0.640578	Not	ARF6-PB.1579.1-Anno	Annotated	812.926	766.493	47.2061	42.9952	61.2088	46.2708	61.663	33.0429	33.8451	40.8444	28.9577	48.0901	49.2142	47.8694
PB.1579.2	ENSG00000165527	ARF6	ENST00000693319	FSM	238.775	-0.770879	0.433674	-1.77755	0.0754771	0.158939	Not	ARF6-PB.1579.2-Anno	Annotated	284.174	186.464	15.8082	10.136	16.8916	22.2803	8.84029	20.0969	10.9321	3.01021	11.6438	9.36985	10.3252	16.3312
PB.1579.3	ENSG00000165527	ARF6	ENST00000693319	FSM	1278.76	0.525796	0.211962	2.48062	0.0131153	0.0384602	Not	ARF6-PB.1579.3-Anno	Annotated	1025.7	1546.64	64.1795	94.3184	61.425	65.0241	44.8426	64.5622	85.0437	93.648	101.794	112.84	77.6062	85.7044
PB.3127.1	ENSG00000101199	ARFGAP1	ENST00000370283	FSM	814.381	0.799485	0.0960734	8.32161	8.67801e-17	2.84369e-15	Not	ARFGAP1-PB.3127.1-Anno	Annotated	579.2	1065	40.3318	71.6558	51.7056	36.3956	45.2587	33.2071	35.092	78.5141	72.6043	73.6918	59.904	73.5648
PB.913.1	ENSG00000149182	ARFGAP2	novel	NIC	660.82	-0.213045	0.103093	-2.06655	0.038777	0.0938293	Not	ARFGAP2-PB.913.1-novel	novel	689.8	628.4	55.7519	49.3464	67.6493	52.1443	61.5068	47.3623	50.0968	55.0362	50.05	44.1288	52.7977	44.7193
PB.3268.1	ENSG00000242247	ARFGAP3	ENST00000263245	FSM	1556.97	0.305975	0.174247	1.75598	0.0790917	0.164851	Not	ARFGAP3-PB.3268.1-Anno	Annotated	1356.8	1771.8	122.209	155.222	131.096	113.856	101.384	150.863	113.846	148.106	139.46	185.005	140.044	163.496
PB.4818.1	ENSG00000066777	ARFGEF1	ENST00000262215	ISM	899.292	0.327876	0.144692	2.26603	0.0234497	0.0622489	Not	ARFGEF1-PB.4818.1-Anno	Annotated	774	1036.6	59.6112	77.429	64.7651	66.3072	55.6063	49.8299	61.5474	71.9493	65.7549	94.6579	69.9144	84.8686
PB.3864.3	ENSG00000164144	ARFIP1	ENST00000451320	FSM	47.4861	-5.71841	1.40505	-4.06991	4.70322e-05	0.000281666	Down	ARFIP1-PB.3864.3-Anno	Annotated	81.9319	9.69608	6.39273	0.715862	12.3419	5.53932	2.32071	2.83835	8.92337	4.59341e-05	1.28757	0	0	2.29169
PB.3864.1	ENSG00000164144	ARFIP1	ENST00000405727	FSM	207.6	0.794295	0.433734	1.8313	0.0670563	0.144491	Not	ARFIP1-PB.3864.1-Anno	Annotated	162.018	256.982	12.6012	19.7062	3.03097	8.79188	18.6768	16.5966	15.9096	20.0044	18.5113	21.7257	18.3948	19.8951
PB.3864.2	ENSG00000164144	ARFIP1	ENST00000353617	FSM	384.363	-0.308632	0.231161	-1.33514	0.18183	0.316189	Not	ARFIP1-PB.3864.2-Anno	Annotated	414.548	351.293	30.2251	25.0918	25.8293	28.8831	41.3689	24.2987	30.7458	23.7358	24.0073	18.7456	33.1144	25.8558
PB.3864.4	ENSG00000164144	ARFIP1	ENST00000356064	FSM	38.8327	2.45902	2.55462	0.962575	0.335761	0.494321	Not	ARFIP1-PB.3864.4-Anno	Annotated	14.5022	67.2283	1.03979	4.80815	0	5.19825	0	0	0.000725627	4.28852	7.672	12.0802	0	3.53295e-05
PB.1518.1	ENSG00000134884	ARGLU1	ENST00000400198	FSM	1861.89	-0.174234	0.0789526	-2.20682	0.0273269	0.0706776	Not	ARGLU1-PB.1518.1-Anno	Annotated	1917.2	1797.2	127.148	116.167	134.255	128.216	132.14	122.214	118.915	116.581	115.507	110.564	113.39	124.792
PB.908.1	ENSG00000175220	ARHGAP1	ENST00000311956	FSM	2246.5	0.362493	0.114504	3.16577	0.00154673	0.00611214	Not	ARHGAP1-PB.908.1-Anno	Annotated	1928.83	2595.35	128.353	167.26	147.669	102.716	169.19	103.044	119.145	181.521	161.65	172.954	173.263	146.915
PB.908.2	ENSG00000175220	ARHGAP1	novel	NIC	226.898	-0.814159	0.408005	-1.99547	0.0459922	0.10737	Not	ARHGAP1-PB.908.2-novel	novel	271.897	179.71	18.6386	11.8947	16.3692	17.1986	15.0009	17.1778	27.4467	10.9809	18.6082	16.8422	4.26339	8.77895
PB.908.3	ENSG00000175220	ARHGAP1	ENST00000529960	FSM	232.603	0.103815	0.239784	0.432952	0.665049	0.785421	Not	ARHGAP1-PB.908.3-Anno	Annotated	218.058	246.616	26.8072	29.3676	32.3965	23.5381	33.6644	17.747	26.6899	32.7344	26.513	21.19	31.7518	34.6486
PB.3862.1	ENSG00000071205	ARHGAP10	ENST00000336498	FSM	1210.31	-1.08101	0.0974346	-11.0948	1.33017e-28	1.23209e-26	Not	ARHGAP10-PB.3862.1-Anno	Annotated	1596	802.6	109.149	53.281	111.614	97.776	112.461	101.744	122.148	43.5542	56.2359	59.1717	54.3626	53.0809
PB.1717.2	ENSG00000198826	ARHGAP11A	ENST00000361627	FSM	74.7952	-4.74143	1.47127	-3.22268	0.00126997	0.00515633	Down	ARHGAP11A-PB.1717.2-Anno	Annotated	98.1456	52.2005	4.43183	2.2418	6.28675	6.54209	0.953185	2.46292	5.91422	4.31079	1.20372e-05	6.77977	0.000252496	0.118151
PB.1717.1	ENSG00000198826	ARHGAP11A	ENST00000361627	FSM	564.917	10.1204	1.96456	5.1515	2.58416e-07	2.55002e-06	Up	ARHGAP11A-PB.1717.1-Anno	Annotated	52.736	1119.86	2.31846	47.887	0	0	7.88961	3.70247	0.000220398	44.7596	31.9667	62.5593	42.3108	57.8388
PB.1955.1	ENSG00000140750	ARHGAP17	ENST00000289968	FSM	2111.81	0.174432	0.148095	1.17784	0.238862	0.387635	Not	ARHGAP17-PB.1955.1-Anno	Annotated	1931	2322.2	125.06	145.105	163.33	132.134	117.765	100.503	111.568	136.189	139.128	188.46	139.511	122.239
PB.4362.1	ENSG00000146376	ARHGAP18	ENST00000368149	FSM	218.725	0.70054	0.311454	2.24926	0.0244959	0.0646554	Not	ARHGAP18-PB.4362.1-Anno	Annotated	164.369	277.732	10.7002	17.5218	11.7558	5.21479	10.6532	12.7986	13.0789	16.5058	18.5036	21.3632	19.514	11.7222
PB.4362.2	ENSG00000146376	ARHGAP18	ENST00000368149	FSM	484.565	-0.143564	0.254108	-0.56497	0.572094	0.708691	Not	ARHGAP18-PB.4362.2-Anno	Annotated	493.588	473.974	34.0536	31.6098	40.6757	22.2961	35.9359	40.1301	31.23	25.8345	39.0181	30.1911	25.3082	37.697
PB.4362.3	ENSG00000146376	ARHGAP18	ENST00000368149	ISM	52.6455	-0.608433	0.405918	-1.49891	0.133898	0.249247	Not	ARHGAP18-PB.4362.3-Anno	Annotated	61.312	43.207	10.0961	7.01476	6.08862	13.1873	13.2363	9.42489	8.5432	4.51089	5.80268	6.90615	12.648	5.20605
PB.4362.4	ENSG00000146376	ARHGAP18	novel	NIC	122.048	-0.247042	0.245006	-1.00831	0.313305	0.471449	Not	ARHGAP18-PB.4362.4-novel	novel	127.464	114.647	11.6252	10.1738	15.3642	9.08126	10.722	11.1093	11.8492	11.2493	11.8032	6.39922	11.6725	9.7446
PB.244.6	ENSG00000137962	ARHGAP29	novel	NIC	219.859	0.102702	0.255288	0.402299	0.687464	0.804144	Not	ARHGAP29-PB.244.6-novel	novel	209.528	230.874	10.9782	11.7374	13.8885	7.144	15.3418	10.4119	8.10469	12.3977	11.3328	9.29507	13.8193	11.8419
PB.244.7	ENSG00000137962	ARHGAP29	novel	NIC	0.190032	-0.808903	3.13988	-0.257622	0.796698	0.878616	Not	ARHGAP29-PB.244.7-novel	novel	0.301869	0	0.0163914	0	5.25119e-09	0	0.0819569	0	0	0	0	0	0	0
PB.1565.1	ENSG00000100852	ARHGAP5	ENST00000556611	ISM	78.2116	-0.414212	0.555147	-0.746131	0.455588	0.608648	Not	ARHGAP5-PB.1565.1-Anno	Annotated	97.7973	58.8006	7.38288	4.12595	19.9505	2.19288	8.13684	2.92249	3.71168	3.29859	2.1944	5.11189	5.32938	4.69552
PB.1565.2	ENSG00000100852	ARHGAP5	ENST00000345122	ISM	430.565	-0.325236	0.283951	-1.14539	0.252046	0.403727	Not	ARHGAP5-PB.1565.2-Anno	Annotated	474.577	390.759	27.316	21.8104	21.9078	20.9923	46.2662	16.7394	30.6744	15.6741	23.9118	24.21	29.6876	15.5685
PB.1565.3	ENSG00000100852	ARHGAP5	ENST00000345122	ISM	227.038	2.58352	1.9418	1.33048	0.183361	0.317579	Not	ARHGAP5-PB.1565.3-Anno	Annotated	201.028	246.876	10.5567	13.2345	0.000727888	36.1734	0.000203828	12.1279	4.48114	18.9125	14.1393	10.5801	0.753929	21.7866
PB.1565.4	ENSG00000100852	ARHGAP5	ENST00000345122	FSM	3119.49	0.0155046	0.136363	0.113701	0.909475	0.945402	Not	ARHGAP5-PB.1565.4-Anno	Annotated	3022.4	3227.16	98.6674	102.88	94.7382	113.396	92.4355	103.356	89.4113	101.873	102.721	120.447	91.2614	98.1
PB.2548.1	ENSG00000076928	ARHGEF1	ENST00000354532	FSM	704.544	0.258974	0.143951	1.79905	0.0720115	0.153066	Not	ARHGEF1-PB.2548.1-Anno	Annotated	627.2	789.8	44.2453	53.8748	55.2463	31.8509	53.5138	38.116	42.4994	57.0511	53.9899	56.7286	59.4765	42.1279
PB.353.1	ENSG00000116584	ARHGEF2	ENST00000361247	FSM	962.182	0.843669	0.206844	4.07877	4.52749e-05	0.000273025	Not	ARHGEF2-PB.353.1-Anno	Annotated	669.952	1274.57	35.5055	65.7434	38.7181	36.4532	25.3092	38.7115	38.3357	67.2876	57.8033	79.7761	52.379	71.4708
PB.353.2	ENSG00000116584	ARHGEF2	ENST00000361247	FSM	502.603	-0.864024	0.26405	-3.2722	0.00106715	0.00447136	Not	ARHGEF2-PB.353.2-Anno	Annotated	626.416	370.261	32.9951	19.1372	29.5619	35.734	24.1028	40.7865	34.7903	19.5992	14.4929	25.6783	23.6017	12.314
PB.353.3	ENSG00000116584	ARHGEF2	novel	NNC	664.049	-0.191813	0.191623	-1.00099	0.316832	0.475179	Not	ARHGEF2-PB.353.3-novel	novel	681.432	652.172	36.8348	34.0269	40.4643	32.6786	36.4869	35.8356	38.7087	30.9286	39.7823	45.8714	23.8642	29.6879
PB.3992.1	ENSG00000214944	ARHGEF28	novel	NIC	316.877	-0.167609	0.192483	-0.870775	0.383877	0.542017	Not	ARHGEF28-PB.3992.1-novel	novel	328.314	303.178	23.4912	20.9449	36.9183	16.5889	24.834	17.9751	21.14	25.035	20.0578	16.0257	23.5386	20.0672
PB.5304.1	ENSG00000131089	ARHGEF9	ENST00000253401	FSM	2208.08	-0.0713272	0.101834	-0.700424	0.483663	0.633298	Not	ARHGEF9-PB.5304.1-Anno	Annotated	2199.54	2206.43	89.2335	87.1433	107.064	78.7407	96.2081	74.097	90.0571	94.5711	82.3236	74.5937	92.8228	91.4051
PB.4409.1	ENSG00000049618	ARID1B	ENST00000637933	FSM	1338.16	-0.156683	0.0984342	-1.59175	0.111441	0.21589	Not	ARID1B-PB.4409.1-Anno	Annotated	1373.6	1304	108.108	99.5378	126.578	120.1	110.193	91.4786	92.1893	93.355	102.293	112.113	103.933	85.9945
PB.1165.1	ENSG00000189079	ARID2	ENST00000334344	FSM	2651.11	-0.336347	0.164764	-2.04138	0.0412128	0.0984545	Not	ARID2-PB.1165.1-Anno	Annotated	2888.2	2403.6	107.161	87.1137	102.175	138.589	93.9859	111.051	90.0024	81.9593	86.9095	108.24	79.1743	79.2857
PB.531.1	ENSG00000054267	ARID4B	ENST00000491632	ISM	1497.83	-0.0630339	0.181697	-0.346918	0.728653	0.838015	Not	ARID4B-PB.531.1-Anno	Annotated	1493.8	1498.2	160.352	157.161	140.872	195.725	123.394	170.141	171.63	147.446	149.406	184.061	138.914	165.977
PB.3398.1	ENSG00000177479	ARIH2	novel	NIC	66.1575	0.260203	0.480258	0.541798	0.587958	0.721035	Not	ARIH2-PB.3398.1-novel	novel	60.5412	72.5601	6.31308	7.37938	8.28943	7.84529	6.93495	6.75065	1.74507	9.49208	3.82221	8.4044	9.73789	5.44034
PB.3398.3	ENSG00000177479	ARIH2	ENST00000356401	FSM	190.918	1.07302	0.586856	1.82841	0.0674875	0.145016	Not	ARIH2-PB.3398.3-Anno	Annotated	140.419	252.355	15.9538	26.1061	44.8451	6.22273	15.2976	7.65511	5.74866	11.2413	19.3252	49.4819	16.5908	33.8915
PB.3398.4	ENSG00000177479	ARIH2	ENST00000449376	FSM	494.547	0.0126476	0.119786	0.105585	0.915912	0.949234	Not	ARIH2-PB.3398.4-Anno	Annotated	477.296	507.198	48.8499	50.7097	54.9195	59.9976	42.1855	41.8997	45.2471	61.9351	52.2348	41.2815	46.3952	51.7018
PB.1300.1	ENSG00000120805	ARL1	ENST00000261636	FSM	757.636	-0.463204	0.103946	-4.45621	8.34219e-06	6.01174e-05	Not	ARL1-PB.1300.1-Anno	Annotated	860.473	655.068	61.031	44.9274	70.0547	40.7698	75.6324	60.7872	57.9107	45.7539	38.2346	51.2889	43.4677	45.8918
PB.1300.2	ENSG00000120805	ARL1	ENST00000261636	FSM	75.925	-0.323913	1.39857	-0.231603	0.816846	0.889162	Not	ARL1-PB.1300.2-Anno	Annotated	95.2055	57.6689	6.64432	3.91759	0.144896	0.425539	10.7461	12.0551	9.85	3.25725	7.82805	6.67051	1.83213	2.95468e-06
PB.1300.3	ENSG00000120805	ARL1	ENST00000261636	FSM	587.493	0.201867	0.122002	1.65461	0.098003	0.195527	Not	ARL1-PB.1300.3-Anno	Annotated	531.521	643.463	40.0994	47.2973	42.4179	40.9187	36.6217	32.8987	47.6403	44.7583	49.143	45.6266	51.9457	45.0128
PB.2207.1	ENSG00000228696	ARL17B	ENST00000575960	FSM	1020.18	-0.444047	0.104033	-4.26832	1.96949e-05	0.000129634	Not	ARL17B-PB.2207.1-Anno	Annotated	1143.2	892	138.052	104.925	136.272	125.718	167.462	133.744	127.063	108.135	97.4337	106.138	127.276	85.6446
PB.4451.1	ENSG00000122644	ARL4A	ENST00000356797	FSM	321.403	-0.128541	0.205373	-0.625892	0.531386	0.675487	Not	ARL4A-PB.4451.1-Anno	Annotated	325.617	319.725	27.0951	25.5733	34.631	24.3669	32.684	18.6432	25.1502	22.8261	33.8508	29.4597	24.3364	17.3935
PB.4451.2	ENSG00000122644	ARL4A	ENST00000651779	FSM	491.805	0.105596	0.159961	0.660137	0.509166	0.655282	Not	ARL4A-PB.4451.2-Anno	Annotated	466.783	516.075	39.4513	43.0151	24.9861	51.2161	42.5616	44.7636	33.729	34.4378	42.3353	42.6369	53.8903	41.7754
PB.2843.1	ENSG00000162980	ARL5A	ENST00000295087	FSM	281.599	0.312903	0.2574	1.21563	0.224127	0.369397	Not	ARL5A-PB.2843.1-Anno	Annotated	248.526	314.807	39.7235	49.2739	29.5165	65.2204	39.8482	27.0915	36.9409	38.1482	45.9328	44.61	48.9692	68.7094
PB.588.1	ENSG00000165997	ARL5B	ENST00000377275	FSM	4146.51	-0.445763	0.326475	-1.36538	0.172134	0.302815	Not	ARL5B-PB.588.1-Anno	Annotated	4684.8	3566.6	138.703	103.506	105.953	168.725	69.9042	203.365	145.57	70.0831	89.332	155.224	97.8922	104.999
PB.3437.1	ENSG00000144746	ARL6IP5	novel	NIC	346.436	-0.0647438	0.156398	-0.413967	0.678898	0.795867	Not	ARL6IP5-PB.3437.1-novel	novel	344.37	347.038	31.9042	31.3076	34.5265	24.4408	35.9655	33.0424	31.5457	34.1041	32.1274	26.0785	32.5058	31.7225
PB.3437.2	ENSG00000144746	ARL6IP5	ENST00000273258	FSM	2428.4	-0.521889	0.134179	-3.8895	0.000100452	0.000556494	Not	ARL6IP5-PB.3437.2-Anno	Annotated	2791.08	2052.66	507.588	361.714	468.067	378.896	604.421	560.484	526.071	317.53	392.798	398.771	373.941	325.527
PB.3290.1	ENSG00000134108	ARL8B	ENST00000256496	FSM	2259.9	0.238159	0.208697	1.14117	0.253799	0.405599	Not	ARL8B-PB.3290.1-Anno	Annotated	2020.2	2514.2	155.047	188.505	140.138	182.336	117.941	175.459	159.361	175.102	164.585	228.915	157.346	216.576
PB.4813.1	ENSG00000104442	ARMC1	ENST00000276569	FSM	320.592	0.48583	0.14967	3.246	0.00117038	0.00480818	Not	ARMC1-PB.4813.1-Anno	Annotated	259.325	384.298	22.5408	32.3947	28.0496	15.3642	25.9845	20.4343	22.8711	33.7639	23.8437	28.4652	38.6781	37.2226
PB.4813.2	ENSG00000104442	ARMC1	ENST00000276569	FSM	192.516	0.229216	0.254845	0.899433	0.368422	0.526535	Not	ARMC1-PB.4813.2-Anno	Annotated	176.875	213.502	18.1828	21.3287	9.99136	21.9749	30.3485	14.9149	13.6843	20.8933	26.1319	29.9905	14.6825	14.9455
PB.3545.1	ENSG00000114098	ARMC8	ENST00000471453	FSM	264.971	0.0108236	0.174173	0.0621431	0.950449	0.971896	Not	ARMC8-PB.3545.1-Anno	Annotated	256.277	276.239	19.6336	20.5859	18.728	18.0095	22.5215	17.7505	21.1584	24.6393	16.2257	25.4084	18.746	17.9103
PB.3545.2	ENSG00000114098	ARMC8	ENST00000481646	FSM	213.702	0.367813	0.420497	0.87471	0.381732	0.53977	Not	ARMC8-PB.3545.2-Anno	Annotated	196.787	228.71	16.194	18.098	33.0779	16.0557	3.70205	14.0814	14.0526	19.4937	14.1423	16.8934	21.0037	18.9569
PB.3545.3	ENSG00000114098	ARMC8	ENST00000469044	FSM	241.933	0.060464	0.323409	0.186958	0.851693	0.908786	Not	ARMC8-PB.3545.3-Anno	Annotated	238.736	248.251	20.1107	20.4604	8.63465	20.1447	32.1552	18.5784	21.0406	21.2947	23.8928	22.6573	14.7013	19.7561
PB.2989.1	ENSG00000135931	ARMC9	ENST00000683575	FSM	169.954	1.21306	0.155861	7.78293	7.08656e-15	1.99313e-13	Not	ARMC9-PB.2989.1-Anno	Annotated	99.6	244.8	9.6121	22.9328	10.0897	9.22291	10.4335	8.21845	10.0959	22.2561	23.7264	24.4394	23.2977	20.9443
PB.5336.1	ENSG00000126947	ARMCX1	ENST00000372829	FSM	660.599	-1.05471	0.182284	-5.78606	7.2058e-09	9.57145e-08	Not	ARMCX1-PB.5336.1-Anno	Annotated	872.6	435.6	94.2002	45.9522	67.3656	77.9243	98.9531	130.414	96.3441	35.9987	51.2104	52.615	43.1467	46.7901
PB.5338.4	ENSG00000102401	ARMCX3	ENST00000471229	FSM	45.49	-7.23347	2.27789	-3.17552	0.00149569	0.00593747	Down	ARMCX3-PB.5338.4-Anno	Annotated	76.7796	12.6567	9.4141	1.43504	23.9763	1.7111	11.0496	5.04161e-09	10.3335	0.0160355	5.20602	0.000792087	1.95205	0.000304283
PB.5338.1	ENSG00000102401	ARMCX3	ENST00000467808	FSM	90.9184	-0.541781	0.374372	-1.44717	0.147849	0.269158	Not	ARMCX3-PB.5338.1-Anno	Annotated	107.309	74.3438	11.6477	7.69104	18.1233	5.3522	14.171	12.0409	8.55124	6.43291	7.16369	9.00342	6.99974	8.85545
PB.5338.2	ENSG00000102401	ARMCX3	ENST00000341189	FSM	281.221	0.0872195	0.268263	0.325127	0.745085	0.850913	Not	ARMCX3-PB.5338.2-Anno	Annotated	268.199	293.168	30.2628	32.5583	27.8168	39.1407	19.1196	38.5763	26.6609	38.7119	29.5909	36.2604	33.7151	24.513
PB.5338.3	ENSG00000102401	ARMCX3	ENST00000471229	FSM	631.419	0.00515656	0.153637	0.0335632	0.973225	0.985479	Not	ARMCX3-PB.5338.3-Anno	Annotated	614.988	644.349	40.8504	42.0266	29.985	43.307	36.264	44.1437	50.5525	35.2111	49.9721	42.2011	46.6725	36.0759
PB.5338.5	ENSG00000102401	ARMCX3	ENST00000341189	FSM	513.966	-0.425184	0.267187	-1.59133	0.111535	0.216011	Not	ARMCX3-PB.5338.5-Anno	Annotated	572.725	452.483	38.2305	29.2209	44.0558	25.4438	43.6629	48.0079	29.9821	20.1748	31.4663	28.7221	26.4676	39.2738
PB.5339.1	ENSG00000271147	ARMCX5-GPRASP2	novel	NIC	253.113	-0.605549	0.161049	-3.76003	0.000169896	0.000885949	Not	ARMCX5-GPRASP2-PB.5339.1-novel	novel	298.111	206.684	17.3778	11.6246	21.9513	15.4243	21.1033	12.913	15.497	11.9079	14.0248	11.5994	9.35274	11.2379
PB.760.1	ENSG00000120029	ARMH3	ENST00000370033	FSM	325.526	0.100441	0.137157	0.732306	0.463982	0.6156	Not	C10orf76-PB.760.1-Anno	Annotated	304.064	347.316	16.3325	18.1461	18.4161	16.0031	16.0489	17.2227	13.9719	16.6172	22.7824	18.4204	17.8998	15.0108
PB.760.2	ENSG00000120029	ARMH3	ENST00000370033	FSM	398.498	0.00572219	0.14797	0.0386712	0.969153	0.98435	Not	C10orf76-PB.760.2-Anno	Annotated	387.322	411.431	26.0255	26.9519	25.8487	23.958	32.4978	23.184	24.6392	31.79	21.0777	27.0812	26.9393	27.871
PB.1611.1	ENSG00000139971	ARMH4	ENST00000267485	FSM	295.742	-0.109426	0.158327	-0.691144	0.489475	0.638201	Not	C14orf37-PB.1611.1-Anno	Annotated	302	293	26.7072	25.0324	25.7144	18.6305	38.7995	25.9048	24.4869	20.8168	24.2486	29.8437	24.1821	26.0707
PB.334.1	ENSG00000143437	ARNT	ENST00000358595	FSM	2794.24	-0.761862	0.113738	-6.69841	2.107e-11	3.91373e-10	Not	ARNT-PB.334.1-Anno	Annotated	3436.28	2131.97	176.309	106.308	186.363	136.235	227.142	173.185	158.617	94.9783	104.399	110.119	126.928	95.115
PB.1850.1	ENSG00000172379	ARNT2	ENST00000533983	ISM	112.978	0.374363	0.346139	1.08154	0.279457	0.434368	Not	ARNT2-PB.1850.1-Anno	Annotated	103.8	125.4	4.09724	4.80904	3.30057	2.08362	9.12255	3.68932	2.29014	5.28427	3.61886	5.22082	6.38394	3.53728
PB.861.1	ENSG00000133794	ARNTL	novel	NIC	72.5483	-0.308462	0.630616	-0.489144	0.624739	0.751526	Not	ARNTL-PB.861.1-novel	novel	77.525	68.0922	6.85432	5.63543	13.8686	4.55938	3.61932	4.7626	7.46171	1.82793	4.29597	9.57333	4.04196	8.43794
PB.861.2	ENSG00000133794	ARNTL	ENST00000403510	FSM	280.027	-0.253974	0.258243	-0.983468	0.325377	0.4833	Not	ARNTL-PB.861.2-Anno	Annotated	297.475	262.508	24.4054	21.0666	18.1136	29.6248	19.2502	29.363	25.6756	17.6912	19.8388	29.1682	18.396	20.2386
PB.4583.1	ENSG00000241685	ARPC1A	ENST00000432786	ISM	1278.74	0.179193	0.0740096	2.42121	0.0154689	0.0440681	Not	ARPC1A-PB.4583.1-Anno	Annotated	1169.11	1399.53	148.889	172.063	181.264	119.268	171.271	129.292	143.348	177.608	151.327	183.389	177.772	170.222
PB.4587.9	ENSG00000130429	ARPC1B	ENST00000646101	FSM	539.909	2.258	0.169648	13.3099	2.0282e-40	4.0257e-38	Up	ARPC1B-PB.4587.9-Anno	Annotated	184.423	927.592	29.7575	144.312	26.516	21.5176	44.6964	30.6091	25.4483	139.663	148.655	188.765	116.307	128.167
PB.4587.2	ENSG00000130429	ARPC1B	ENST00000646101	FSM	68.5207	3.99572	1.07956	3.70123	0.000214553	0.00109034	Up	ARPC1B-PB.4587.2-Anno	Annotated	30.3041	112.942	3.94066	13.7756	4.42439	0	14.4862	0.792583	0.000143766	18.4771	8.29002	21.8577	16.2199	4.03353
PB.4587.1	ENSG00000130429	ARPC1B	ENST00000646101	FSM	20.4518	-1.41592	2.62359	-0.53969	0.589411	0.72191	Not	ARPC1B-PB.4587.1-Anno	Annotated	19.1328	21.6414	2.1923	2.42795	8.5386e-08	1.41216	0	3.21081	6.33852	0	0	3.61745	5.81881e-08	8.52228
PB.4587.11	ENSG00000130429	ARPC1B	ENST00000427217	FSM	43.4235	2.47139	1.30044	1.90043	0.0573765	0.127919	Not	ARPC1B-PB.4587.11-Anno	Annotated	28.8281	59.5425	4.89309	9.45465	10.6367	3.18525	10.6435	0	0	12.6766	8.99589	8.18885	13.9989	3.41305
PB.4587.3	ENSG00000130429	ARPC1B	ENST00000646101	ISM	116.61	0.504652	0.356007	1.41753	0.156327	0.281493	Not	ARPC1B-PB.4587.3-Anno	Annotated	92.4645	144.556	12.4055	18.5966	15.5309	7.97396	13.2434	11.2865	13.9928	16.5158	19.2917	27.3697	20.1459	9.66011
PB.4587.6	ENSG00000130429	ARPC1B	ENST00000458033	FSM	54.7844	0.0279019	1.5065	0.018521	0.985223	0.990655	Not	ARPC1B-PB.4587.6-Anno	Annotated	44.5077	65.4939	7.22153	9.99593	8.82229	0	9.50905	4.65332	13.123	4.90447e-05	22.7628	8.32213	6.95219	11.9425
PB.4587.7	ENSG00000130429	ARPC1B	ENST00000645391	FSM	244.316	0.0386373	0.241165	0.160211	0.872715	0.922892	Not	ARPC1B-PB.4587.7-Anno	Annotated	230.619	259.858	36.8546	39.8621	59.3406	26.6134	38.5988	30.3917	29.3286	50.0954	16.7955	44.8916	51.184	36.3441
PB.4587.8	ENSG00000130429	ARPC1B	ENST00000645391	FSM	4.82856	-1.67323	3.08726	-0.541979	0.587833	0.721035	Not	ARPC1B-PB.4587.8-Anno	Annotated	8.65652	0.38834	1.26873	0.0552285	0.275437	0	1.42748e-08	0	6.06821	0	0	0	1.52229e-08	0.276143
PB.2960.1	ENSG00000163466	ARPC2	ENST00000489598	FSM	463.573	0.462428	0.127867	3.61647	0.000298642	0.00145387	Not	ARPC2-PB.2960.1-Anno	Annotated	380.939	554.963	58.8978	82.6528	69.8534	37.8449	67.9002	61.0687	57.822	88.4802	66.467	95.9524	73.879	88.4853
PB.2960.2	ENSG00000163466	ARPC2	ENST00000295685	FSM	2661.35	0.864957	0.122922	7.03662	1.96961e-12	4.18438e-11	Not	ARPC2-PB.2960.2-Anno	Annotated	1819.66	3588.64	319.72	608.553	318.782	327.569	354.594	273.595	324.059	585.05	510.01	796.428	479.808	671.47
PB.1780.1	ENSG00000128989	ARPP19	ENST00000566423	FSM	571.795	0.361501	0.385943	0.936669	0.348929	0.507965	Not	ARPP19-PB.1780.1-Anno	Annotated	517.563	638.471	21.6292	25.5962	18.7429	5.67464	34.162	15.6356	33.9311	16.2139	31.3786	30.8314	21.2021	28.355
PB.1780.2	ENSG00000128989	ARPP19	ENST00000249822	FSM	1704.67	0.624192	0.217692	2.86732	0.0041397	0.0143077	Not	ARPP19-PB.1780.2-Anno	Annotated	1323.07	2121.95	54.608	83.9211	91.8819	46.9543	36.5329	41.3491	56.3219	91.1254	69.5124	107.286	62.2879	89.3944
PB.1780.3	ENSG00000128989	ARPP19	ENST00000567669	FSM	729.939	0.546197	0.540327	1.01086	0.312082	0.470289	Not	ARPP19-PB.1780.3-Anno	Annotated	604.051	855.905	25.1792	35.8677	4.29055	18.5504	23.1009	44.7022	35.2517	60.3578	18.9333	33.7725	35.9246	30.3503
PB.1780.4	ENSG00000128989	ARPP19	ENST00000564163	FSM	748.517	-0.022719	0.259367	-0.087594	0.930199	0.959052	Not	ARPP19-PB.1780.4-Anno	Annotated	762.074	728.76	32.6874	30.072	55.9899	38.6061	18.4947	16.8273	33.519	28.2728	31.9376	30.4434	27.9755	31.7306
PB.1780.5	ENSG00000128989	ARPP19	ENST00000249822	FSM	761.834	-0.336017	0.353213	-0.951315	0.341444	0.499687	Not	ARPP19-PB.1780.5-Anno	Annotated	839.341	681.458	35.6013	28.4762	20.4324	51.6971	56.0123	40.1397	9.72509	8.26649	40.1819	25.3468	44.9893	23.5968
PB.1780.6	ENSG00000128989	ARPP19	ENST00000566423	FSM	13.0268	-0.0923081	3.04366	-0.030328	0.975805	0.98593	Not	ARPP19-PB.1780.6-Anno	Annotated	9.90207	15.314	0.756354	1.19281	3.65005e-05	0	0	3.78173	0	0	0	1.6959e-05	0	5.96402
PB.4023.1	ENSG00000113369	ARRDC3	novel	NIC	3000.12	-1.09424	0.235269	-4.65101	3.30319e-06	2.58707e-05	Not	ARRDC3-PB.4023.1-novel	novel	4043.59	1919.68	188.111	87.4024	185.964	124.193	292.888	213.37	124.143	100.923	88.8608	66.6619	111.914	68.6519
PB.4023.2	ENSG00000113369	ARRDC3	ENST00000265138	FSM	1997.59	-0.772553	0.199705	-3.86847	0.000109521	0.00060098	Not	ARRDC3-PB.4023.2-Anno	Annotated	2401.69	1518.6	127.572	79.6726	127.417	130.48	70.0598	158.261	151.644	64.7975	117.107	47.7352	115.866	52.8574
PB.4023.3	ENSG00000113369	ARRDC3	ENST00000265138	FSM	3824.99	-0.800896	0.192662	-4.157	3.2246e-05	0.000201451	Not	ARRDC3-PB.4023.3-Anno	Annotated	4749.81	2836.64	326.264	190.48	339.345	241.972	394.488	404.546	250.97	215.457	215.69	150.181	201.713	169.36
PB.4023.4	ENSG00000113369	ARRDC3	ENST00000507075	ISM	212.385	-0.777564	0.335827	-2.31537	0.0205924	0.0558157	Not	ARRDC3-PB.4023.4-Anno	Annotated	260.357	160.223	36.1962	21.694	37.6475	22.9143	48.0696	43.7566	28.5931	21.8022	28.9064	12.5483	24.978	20.2354
PB.1876.1	ENSG00000140450	ARRDC4	ENST00000268042	FSM	1011.75	-0.699801	0.169158	-4.13697	3.51928e-05	0.000217773	Not	ARRDC4-PB.1876.1-Anno	Annotated	1228.6	779.2	66.5685	41.3227	63.5962	103.397	58.0238	53.5711	54.2544	46.2435	44.8549	47.2167	34.6254	33.6728
PB.3825.1	ENSG00000180801	ARSJ	ENST00000315366	FSM	257.418	1.42685	0.313606	4.54982	5.36918e-06	4.00641e-05	Not	ARSJ-PB.3825.1-Anno	Annotated	132.655	395.917	11.8566	34.1501	12.7077	12.3457	8.23704	12.2033	13.7892	28.7494	33.3677	54.7598	23.6667	30.2068
PB.3825.2	ENSG00000180801	ARSJ	ENST00000315366	FSM	127.835	1.25216	0.4837	2.58871	0.00963354	0.0294431	Not	ARSJ-PB.3825.2-Anno	Annotated	78.0451	180.218	6.91975	15.6033	7.81247	9.48475	5.21603	10.1578	1.92769	10.1974	17.6535	16.1494	14.8048	19.2112
PB.3825.3	ENSG00000180801	ARSJ	novel	NIC	176.733	0.693656	0.304629	2.27705	0.0227831	0.0607812	Not	ARSJ-PB.3825.3-novel	novel	129.3	222.265	12.8761	21.3319	21.5471	9.47229	8.52154	12.0589	12.7806	17.8778	29.7061	11.5206	23.0725	24.4824
PB.641.1	ENSG00000204147	ASAH2B	ENST00000374007	FSM	216.839	0.310333	0.190529	1.6288	0.103356	0.203634	Not	ASAH2B-PB.641.1-Anno	Annotated	187.995	245.468	13.6479	17.3945	15.1629	14.5692	12.7804	9.76725	15.9595	21.4327	18.6571	14.6117	17.5284	14.7428
PB.4907.1	ENSG00000153317	ASAP1	ENST00000518721	FSM	1170.85	0.440073	0.204767	2.14913	0.0316238	0.0793393	Not	ASAP1-PB.4907.1-Anno	Annotated	981.569	1378.98	38.2249	51.4583	61.0742	25.3879	35.1136	34.3595	35.1895	45.5028	51.0393	60.8289	45.8543	54.0664
PB.4907.2	ENSG00000153317	ASAP1	ENST00000357668	FSM	3177.11	0.472289	0.162559	2.90534	0.00366849	0.0129431	Not	ASAP1-PB.4907.2-Anno	Annotated	2578.68	3841.25	99.1751	143.324	107.587	109.721	87.0048	90.9245	100.638	127.754	135.303	192.515	129.982	131.066
PB.2612.1	ENSG00000151693	ASAP2	ENST00000315273	FSM	1305.78	-0.21359	0.119139	-1.79279	0.0730065	0.155005	Not	ASAP2-PB.2612.1-Anno	Annotated	1362.4	1259.2	54.5989	48.6978	61.8993	46.4114	63.8444	48.153	52.6863	39.1726	47.9414	60.7758	42.6188	52.9806
PB.2709.1	ENSG00000115239	ASB3	ENST00000263634	FSM	303.426	-0.216508	0.173307	-1.24927	0.211565	0.353658	Not	ASB3-PB.2709.1-Anno	Annotated	317.008	289.756	38.6297	34.3154	37.6525	37.0139	44.4872	40.6668	33.3283	38.1495	35.4757	36.3616	27.2511	34.3393
PB.2709.2	ENSG00000115239	ASB3	ENST00000394717	FSM	42.9502	0.281522	1.42222	0.197945	0.843088	0.902486	Not	ASB3-PB.2709.2-Anno	Annotated	38.5916	47.4441	5.21081	6.40069	0	2.29388	4.51631	4.12847	15.1154	6.44057	0	7.19773	12.4006	5.96452
PB.5130.1	ENSG00000148331	ASB6	ENST00000277458	FSM	1087.72	-0.527783	0.115324	-4.57651	4.72799e-06	3.57015e-05	Not	ASB6-PB.5130.1-Anno	Annotated	1253.84	905.428	60.0501	42.1966	81.5401	62.192	49.2518	60.7253	46.5412	44.3412	41.8063	40.046	45.4688	39.3205
PB.1878.1	ENSG00000183475	ASB7	ENST00000332783	FSM	400.76	0.029028	0.234853	0.123601	0.901632	0.940344	Not	ASB7-PB.1878.1-Anno	Annotated	382.6	424	17.1347	18.3906	19.7559	19.4709	14.9984	15.8372	15.6111	17.1949	13.2633	25.6312	15.2262	20.6372
PB.1167.1	ENSG00000177981	ASB8	ENST00000317697	FSM	490.72	-0.468503	0.181967	-2.57466	0.0100339	0.030479	Not	ASB8-PB.1167.1-Anno	Annotated	557.008	421.332	79.1762	58.2755	73.196	67.1758	106.918	66.5047	82.0863	65.5917	57.7028	50.7527	63.3462	53.9839
PB.3217.1	ENSG00000100325	ASCC2	ENST00000397771	FSM	426.888	0.352406	0.124059	2.84064	0.00450234	0.0153022	Not	ASCC2-PB.3217.1-Anno	Annotated	366.813	495.975	29.2718	38.4055	28.6664	21.4481	38.8696	29.3989	27.9758	44.1602	28.6107	46.8519	36.1546	36.2499
PB.3217.2	ENSG00000100325	ASCC2	ENST00000307790	FSM	164.796	0.378681	0.374491	1.01119	0.311927	0.470157	Not	ASCC2-PB.3217.2-Anno	Annotated	148.26	178.135	12.1059	14.1659	16.6027	21.7184	8.1845	2.74874	11.2753	15.6523	20.9624	8.2335	12.3737	13.6074
PB.3217.3	ENSG00000100325	ASCC2	novel	NIC	56.1959	-1.01236	0.562749	-1.79895	0.0720272	0.153066	Not	ASCC2-PB.3217.3-novel	novel	77.7267	34.0893	6.69143	2.82428	10.5883	1.22659	10.2939	7.12874	4.21959	3.66087	2.32311	2.00876	3.48534	2.6433
PB.4320.1	ENSG00000112249	ASCC3	ENST00000369162	ISM	879.12	1.17628	0.202295	5.81467	6.07524e-09	8.21103e-08	Not	ASCC3-PB.4320.1-Anno	Annotated	519.6	1272	28.6828	68.12	29.4086	34.6976	27.678	24.9621	26.6675	63.331	52.4598	91.4499	52.289	81.0702
PB.4771.1	ENSG00000129691	ASH2L	ENST00000343823	ISM	438.013	0.160711	0.115771	1.38818	0.165083	0.293083	Not	ASH2L-PB.4771.1-Anno	Annotated	401.737	475.776	53.0665	61.0118	55.3114	51.7941	61.8143	47.8119	48.6006	62.389	63.9698	56.6347	58.4887	63.5771
PB.4529.1	ENSG00000126522	ASL	ENST00000395332	FSM	319.708	0.0285054	0.176303	0.161684	0.871555	0.92269	Not	ASL-PB.4529.1-Anno	Annotated	311.2	331	37.4721	38.7069	35.0532	25.9253	52.3864	35.4539	38.5418	44.889	34.1129	40.5191	39.9752	34.0383
PB.2905.1	ENSG00000138381	ASNSD1	novel	NIC	265.731	0.136224	0.197332	0.690331	0.489986	0.638262	Not	ASNSD1-PB.2905.1-novel	novel	246.398	286.352	21.0037	23.7618	18.2401	18.804	26.9879	19.5053	21.4812	25.4995	28.1994	22.6425	18.8772	23.5905
PB.2905.2	ENSG00000138381	ASNSD1	ENST00000260952	FSM	375.359	0.0600115	0.324972	0.184667	0.85349	0.909665	Not	ASNSD1-PB.2905.2-Anno	Annotated	365.529	389.045	37.3232	39.1193	18.4866	51.7682	35.2635	42.6651	38.4324	37.5458	26.9186	56.4384	38.0314	36.6623
PB.4810.2	ENSG00000198363	ASPH	novel	NIC	75.0401	2.13105	0.738612	2.88521	0.00391149	0.0136206	Up	ASPH-PB.4810.2-novel	novel	32.8603	116.335	1.42327	4.84439	1.76194	0.257672	0.419103	0.00591126	4.6717	3.16353	0.596163	1.8683	1.89346	16.7005
PB.4810.1	ENSG00000198363	ASPH	ENST00000379454	FSM	93.7217	-0.806839	0.576863	-1.39867	0.161913	0.289154	Not	ASPH-PB.4810.1-Anno	Annotated	120.438	66.8636	5.02561	2.69052	4.80502	6.32558	8.66383	0.876618	4.457	1.20457	4.00799	2.65451	3.17204	2.41346
PB.4810.10	ENSG00000198363	ASPH	novel	NIC	1048.57	0.358182	0.109776	3.26284	0.00110301	0.00457468	Not	ASPH-PB.4810.10-novel	novel	899.632	1209.98	54.3351	70.4329	74.3392	39.1859	52.0659	44.7174	61.3672	73.3782	59.5988	78.7599	63.5848	76.8428
PB.4810.11	ENSG00000198363	ASPH	ENST00000356457	FSM	1684.48	1.26562	0.165271	7.65783	1.89102e-14	5.09183e-13	Not	ASPH-PB.4810.11-Anno	Annotated	974.843	2474.49	75.896	187.248	49.664	70.5811	104.338	78.5458	76.3506	169.718	174.72	269.539	150.357	171.907
PB.4810.12	ENSG00000198363	ASPH	novel	NIC	64.7554	0.285173	0.423094	0.674018	0.5003	0.648551	Not	ASPH-PB.4810.12-novel	novel	58.1159	72.1827	5.02451	5.96198	9.28409	3.10186	3.62759	5.86729	3.24172	5.76176	3.47728	7.75932	6.06987	6.74167
PB.4810.3	ENSG00000198363	ASPH	novel	NIC	925.062	0.0832332	0.251908	0.330411	0.741089	0.847537	Not	ASPH-PB.4810.3-novel	novel	894.157	967.991	37.5122	39.0878	46.9031	16.1331	41.0535	44.8612	38.6103	30.7499	37.2545	50.2354	37.919	39.2802
PB.5080.1	ENSG00000148219	ASTN2	novel	NIC	199.818	-0.157956	0.229429	-0.688476	0.491153	0.639079	Not	ASTN2-PB.5080.1-novel	novel	205.337	193.204	17.872	16.3236	22.3556	12.8345	22.4116	15.2708	16.4874	20.2951	16.8376	12.2766	17.6459	14.5629
PB.2637.1	ENSG00000143970	ASXL2	ENST00000336112	FSM	2120.2	0.0446377	0.114732	0.389061	0.697231	0.813105	Not	ASXL2-PB.2637.1-Anno	Annotated	2036.8	2206.2	61.2918	64.7503	69.8786	73.1834	56.5123	54.9015	51.9832	61.9358	64.1167	69.534	70.4813	57.6834
PB.701.1	ENSG00000138138	ATAD1	ENST00000680024	FSM	998.653	0.0217414	0.0767428	0.283302	0.776945	0.867699	Not	ATAD1-PB.701.1-Anno	Annotated	965.4	1039.6	82.9743	86.5951	85.1585	75.2181	94.7971	69.7902	89.9077	79.3068	82.4905	100.075	87.089	84.014
PB.4893.1	ENSG00000156802	ATAD2	ENST00000287394	FSM	1094.63	1.28999	0.18338	7.03449	1.99991e-12	4.23579e-11	Not	ATAD2-PB.4893.1-Anno	Annotated	616.59	1614.66	27.6704	70.0573	35.5641	30.0498	23.0442	23.6731	26.0208	72.3542	57.867	92.3936	57.0083	70.6636
PB.4893.2	ENSG00000156802	ATAD2	ENST00000287394	ISM	187.12	0.356256	0.358218	0.994523	0.319968	0.478467	Not	ATAD2-PB.4893.2-Anno	Annotated	163.21	213.338	12.3109	15.8599	3.67134	13.601	16.9283	13.7518	13.6018	9.58578	8.19426	17.9989	18.2121	25.3084
PB.2634.1	ENSG00000119778	ATAD2B	ENST00000238789	ISM	457.675	-0.118685	0.146997	-0.807401	0.419435	0.575512	Not	ATAD2B-PB.2634.1-Anno	Annotated	463.633	449.864	28.975	27.3898	32.3309	25.359	34.9158	24.6496	27.6196	30.3992	26.0388	22.9052	30.1037	27.502
PB.2149.1	ENSG00000176208	ATAD5	ENST00000578295	ISM	125.796	1.74073	0.259183	6.71624	1.86475e-11	3.50119e-10	Not	ATAD5-PB.2149.1-Anno	Annotated	56.6	200.2	5.41039	18.644	5.4924	6.8116	5.48205	4.81361	4.45227	20.0882	14.7834	22.3754	18.0115	17.9613
PB.4215.1	ENSG00000137343	ATAT1	ENST00000318999	FSM	23.9465	1.54654	1.04577	1.47885	0.139181	0.257052	Not	ATAT1-PB.4215.1-Anno	Annotated	18.3055	29.1708	1.56277	2.54973	0.630277	4.37844	0	1.26972	1.53543	3.44927	1.27901	1.21273	4.12872	2.67893
PB.794.1	ENSG00000107669	ATE1	ENST00000369043	FSM	320.181	0.369423	0.549369	0.67245	0.501297	0.648875	Not	ATE1-PB.794.1-Anno	Annotated	247.892	404.587	10.9537	17.4857	5.60179	17.3097	14.3194	14.216	3.32167	1.62006	12.0171	28.6647	23.1265	22.0003
PB.794.2	ENSG00000107669	ATE1	ENST00000540606	FSM	373.065	-0.570813	0.431632	-1.32245	0.186017	0.32082	Not	ATE1-PB.794.2-Anno	Annotated	432.442	307.81	19.9415	13.8459	23.7231	8.98667	29.2217	16.6652	21.1108	18.3209	18.2644	5.41926	15.5359	11.689
PB.794.3	ENSG00000107669	ATE1	ENST00000369043	FSM	150.979	-1.51822	0.899984	-1.68694	0.0916144	0.185818	Not	ATE1-PB.794.3-Anno	Annotated	193.266	106.004	12.8899	6.8779	18.8288	12.6159	13.0935	8.75285	11.1582	15.0215	9.14209	6.02213	4.2035	0.000321297
PB.2880.1	ENSG00000115966	ATF2	ENST00000345739	FSM	938.118	0.127038	0.281332	0.451559	0.651587	0.773641	Not	ATF2-PB.2880.1-Anno	Annotated	887.812	997.477	47.5358	52.405	28.6848	53.6634	38.5292	68.1345	48.6671	46.5391	51.4505	74.6397	40.0209	49.3747
PB.2880.2	ENSG00000115966	ATF2	ENST00000264110	FSM	1092.13	-0.611983	0.160818	-3.80543	0.000141557	0.000754715	Not	ATF2-PB.2880.2-Anno	Annotated	1278.93	894.674	68.246	46.397	78.632	69.5962	74.7725	58.4459	59.7834	33.9615	47.2126	45.8336	59.0178	45.9595
PB.2880.3	ENSG00000115966	ATF2	ENST00000428760	ISM	128.562	-0.171641	0.191139	-0.897988	0.369192	0.527298	Not	ATF2-PB.2880.3-Anno	Annotated	132.663	124.449	18.1055	16.4167	19.9878	15.0835	22.6869	14.3274	18.442	18.2641	15.9078	16.0004	14.7887	17.1227
PB.375.1	ENSG00000118217	ATF6	ENST00000367942	FSM	1732.1	-0.308522	0.151229	-2.0401	0.0413401	0.0986568	Not	ATF6-PB.375.1-Anno	Annotated	1866.87	1586.17	135.898	112.826	123.236	159.38	113.788	144.885	138.199	104.138	111.228	131.94	105.8	111.023
PB.1118.1	ENSG00000171681	ATF7IP	ENST00000261168	FSM	2443	-0.366794	0.0886269	-4.13863	3.49389e-05	0.000216522	Not	ATF7IP-PB.1118.1-Anno	Annotated	2678.8	2195.6	141.927	113.349	150.961	145.656	157.693	124.86	130.463	110.077	105.891	116.24	128.123	106.415
PB.4057.1	ENSG00000145782	ATG12	ENST00000509910	FSM	42.9441	1.30951	2.16446	0.605006	0.545175	0.688105	Not	ATG12-PB.4057.1-Anno	Annotated	51.5295	42.1747	6.30756	4.65899	4.4894e-09	1.90912e-09	31.5378	1.48462e-05	0	0.000274612	7.9418e-09	20.7273	0.0746878	2.49267
PB.4057.2	ENSG00000145782	ATG12	ENST00000509910	FSM	296.457	0.340015	0.155258	2.19	0.0285244	0.0732025	Not	ATG12-PB.4057.2-Anno	Annotated	253.18	341.205	35.4424	46.119	36.005	29.1237	35.1551	26.243	50.685	44.0467	52.5836	44.002	30.6081	59.3547
PB.4057.3	ENSG00000145782	ATG12	ENST00000509910	FSM	147.895	-1.00817	0.879284	-1.14658	0.251554	0.403403	Not	ATG12-PB.4057.3-Anno	Annotated	167.618	121.746	21.7157	15.3617	39.2513	15.5123	12.3768	24.3641	17.0742	22.0846	17.3849	0.00279405	18.4131	18.923
PB.4057.4	ENSG00000145782	ATG12	ENST00000509910	FSM	75.4207	-0.795727	1.32438	-0.600829	0.547954	0.69086	Not	ATG12-PB.4057.4-Anno	Annotated	83.9752	68.0731	12.2766	9.9103	3.99122	28.14	1.67659	27.5751	0	0.000391469	2.42915	29.246	17.6244	0.251625
PB.909.1	ENSG00000175224	ATG13	ENST00000524625	FSM	811.737	-0.0664536	0.106606	-0.623358	0.533049	0.676897	Not	ATG13-PB.909.1-Anno	Annotated	807.32	814.65	44.4733	43.7395	48.7792	46.9506	45.3877	35.6655	45.5835	50.7984	38.319	42.8885	41.4153	45.2765
PB.909.2	ENSG00000175224	ATG13	novel	NIC	346.999	0.49977	0.197315	2.53285	0.011314	0.0338057	Not	ATG13-PB.909.2-novel	novel	285.614	417.95	15.4193	21.6988	20.569	13.9362	20.4828	13.5488	8.55989	19.2038	20.1753	28.022	21.6292	19.4637
PB.2994.1	ENSG00000085978	ATG16L1	ENST00000392017	FSM	385.295	0.125616	0.153192	0.819991	0.412221	0.569551	Not	ATG16L1-PB.2994.1-Anno	Annotated	358.4	413	24.2279	27.27	25.1828	28.3019	25.841	21.195	20.6189	34.0748	25.5909	26.4682	23.9453	26.2705
PB.949.1	ENSG00000110046	ATG2A	novel	NNC	763.014	-0.286123	0.130717	-2.18888	0.0286055	0.0733834	Not	ATG2A-PB.949.1-novel	novel	819	703.6	28.5412	23.8172	38.657	28.2907	29.9575	23.0395	22.7612	25.3167	22.0749	22.8533	27.9776	20.8635
PB.1689.1	ENSG00000066739	ATG2B	ENST00000359933	FSM	2380.98	0.00143521	0.120992	0.011862	0.990536	0.993826	Not	ATG2B-PB.1689.1-Anno	Annotated	2314.8	2464.4	65.4663	67.8839	63.899	74.1236	65.14	61.3094	62.8593	62.2434	63.0343	84.5103	64.0384	65.5928
PB.3013.1	ENSG00000168397	ATG4B	ENST00000404914	ISM	341.483	-0.591602	0.192161	-3.07868	0.00207922	0.0079321	Not	ATG4B-PB.3013.1-Anno	Annotated	394.63	281.283	24.6292	17.1214	36.6514	21.9737	21.131	21.783	21.607	19.4999	15.563	12.1384	25.8387	12.5671
PB.3013.2	ENSG00000168397	ATG4B	ENST00000404914	FSM	246.853	0.270603	0.291939	0.926915	0.353971	0.512299	Not	ATG4B-PB.3013.2-Anno	Annotated	218.97	277.917	17.7637	21.8066	22.9679	20.6945	15.9159	18.8289	10.4113	23.3336	20.1168	26.9818	14.9243	23.6763
PB.171.1	ENSG00000125703	ATG4C	ENST00000317868	FSM	111.807	-0.184124	0.277191	-0.664251	0.50653	0.652729	Not	ATG4C-PB.171.1-Anno	Annotated	114.869	109.321	10.1868	9.35016	12.0773	8.24959	12.3584	9.04089	9.20788	5.99469	7.59157	10.6554	11.1122	11.397
PB.171.2	ENSG00000125703	ATG4C	ENST00000317868	FSM	64.2292	-0.0883101	0.341773	-0.258388	0.796107	0.878616	Not	ATG4C-PB.171.2-Anno	Annotated	64.5307	63.8787	9.97589	9.66024	6.35265	12.025	9.70952	10.1663	11.626	9.22595	12.2637	10.7692	7.28376	8.75865
PB.4327.1	ENSG00000057663	ATG5	ENST00000369076	FSM	507.622	0.0860196	0.0956544	0.899275	0.368506	0.526535	Not	ATG5-PB.4327.1-Anno	Annotated	480	542.2	35.378	38.7421	33.8455	29.7694	43.5722	35.6617	34.0413	34.3172	34.0112	48.2417	36.562	40.5782
PB.1584.1	ENSG00000198513	ATL1	ENST00000553509	ISM	538.57	-0.347404	0.0877431	-3.95933	7.51589e-05	0.000430444	Not	ATL1-PB.1584.1-Anno	Annotated	589.2	489.8	53.9725	43.513	48.5347	48.0141	71.0193	49.4967	52.7976	37.2954	44.3368	51.0661	42.8157	42.0508
PB.2673.1	ENSG00000119787	ATL2	novel	NIC	1143.97	-0.113441	0.0743498	-1.52578	0.127065	0.239285	Not	ATL2-PB.2673.1-novel	novel	1152.22	1121.09	43.1862	41.0344	57.8153	42.7692	34.9579	38.126	42.2626	51.2838	37.5213	31.7561	42.9496	41.661
PB.2673.2	ENSG00000119787	ATL2	ENST00000378954	FSM	654.287	0.326902	0.233174	1.40196	0.160927	0.287811	Not	ATL2-PB.2673.2-Anno	Annotated	578.052	726.675	45.0294	55.3408	52.6053	63.6443	22.1152	40.868	45.9141	53.4731	55.1711	54.0241	53.7595	60.2762
PB.945.1	ENSG00000184743	ATL3	ENST00000398868	FSM	4578.86	0.189802	0.151347	1.25408	0.209811	0.351558	Not	ATL3-PB.945.1-Anno	Annotated	4190.7	5014.81	130.56	151.475	144.229	87.0044	155.854	135.495	130.217	134.062	160.185	167.042	159.794	136.291
PB.945.3	ENSG00000184743	ATL3	ENST00000398868	FSM	503.116	0.3585	0.347727	1.03098	0.302549	0.459916	Not	ATL3-PB.945.3-Anno	Annotated	459.563	566.928	13.9324	16.5833	10.4614	20.7109	19.2281	2.70852	16.5528	19.7318	11.273	29.6633	7.90423	14.344
PB.945.4	ENSG00000184743	ATL3	ENST00000538786	FSM	541.34	-0.645907	0.313341	-2.06135	0.0392695	0.0948557	Not	ATL3-PB.945.4-Anno	Annotated	645.329	422.359	20.1203	13.071	15.6047	32.8608	16.3543	15.435	20.3468	16.4749	8.53471	9.5247	13.1528	17.668
PB.3713.1	ENSG00000145246	ATP10D	ENST00000273859	FSM	936.85	-0.338856	0.163845	-2.06816	0.0386253	0.0935272	Not	ATP10D-PB.3713.1-Anno	Annotated	1022	848.2	36.9489	29.687	47.6621	44.1303	33.9871	29.0578	29.9072	26.9825	29.7757	33.6242	25.3497	32.7027
PB.3617.1	ENSG00000058063	ATP11B	ENST00000323116	FSM	1954.03	0.0593794	0.130626	0.454575	0.649415	0.771799	Not	ATP11B-PB.3617.1-Anno	Annotated	1867	2043.8	85.8443	92.0091	71.7168	98.5626	86.4048	93.4617	79.0753	80.589	88.6157	99.5214	88.4438	102.876
PB.2498.1	ENSG00000105726	ATP13A1	ENST00000357324	FSM	765.126	0.469203	0.138811	3.38016	0.000724445	0.00318325	Not	ATP13A1-PB.2498.1-Anno	Annotated	629.523	916.077	36.8024	51.3811	56.529	29.5811	36.5372	28.4503	32.9144	56.0482	50.0891	63.3565	44.9636	42.4479
PB.2498.2	ENSG00000105726	ATP13A1	novel	NNC	71.9627	3.58731	1.26661	2.8322	0.00462289	0.0156583	Up	ATP13A1-PB.2498.2-novel	novel	28.2773	118.123	1.61649	6.70989	2.49144e-06	2.41751	4.38959	1.27534	0	5.93156	4.99951	5.27167	9.81007	7.53664
PB.45.1	ENSG00000159363	ATP13A2	novel	NIC	421.045	0.616088	0.170119	3.62152	0.000292879	0.00142881	Not	ATP13A2-PB.45.1-novel	novel	325.8	520.2	18.1521	28.0946	25.9651	19.5964	18.9445	12.5895	13.6647	30.8191	30.0816	25.4683	32.6421	21.4617
PB.3643.1	ENSG00000133657	ATP13A3	ENST00000687055	ISM	3090.02	1.0854	0.308628	3.51686	0.000436682	0.00203704	Not	ATP13A3-PB.3643.1-Anno	Annotated	1919.8	4377.2	125.973	279.02	130.805	139.727	70.5572	155.897	132.878	224.071	223.867	418.903	225.056	303.205
PB.288.1	ENSG00000163399	ATP1A1	ENST00000295598	FSM	17697.4	0.049903	0.176005	0.283532	0.776769	0.867699	Not	ATP1A1-PB.288.1-Anno	Annotated	17106.6	18118.2	1039.2	1075.17	1371.76	1372.51	633.23	895.53	922.986	1209.9	1133.69	1001.28	1197.23	833.772
PB.456.2	ENSG00000058668	ATP2B4	ENST00000357681	FSM	116.581	-2.54921	0.935455	-2.7251	0.00642824	0.0208191	Down	ATP2B4-PB.456.2-Anno	Annotated	182.609	48.095	4.41506	1.10634	0.00112459	11.4046	2.39812	0.95133	7.32011	5.89661e-10	0.590238	4.46407	0.228075	0.24931
PB.456.1	ENSG00000058668	ATP2B4	ENST00000357681	FSM	676.083	-1.19297	0.253579	-4.70453	2.54456e-06	2.06508e-05	Not	ATP2B4-PB.456.1-Anno	Annotated	915.783	431.1	22.7252	10.383	24.0904	29.2795	27.756	13.898	18.602	7.96174	9.01172	14.2528	13.9411	6.74741
PB.456.3	ENSG00000058668	ATP2B4	ENST00000341360	ISM	1482.78	-0.195896	0.145193	-1.34921	0.177269	0.310042	Not	ATP2B4-PB.456.3-Anno	Annotated	1537.24	1418.85	151.534	135.75	189.404	124.068	178.042	128.821	137.336	157.825	116.743	107.488	147.739	148.953
PB.456.4	ENSG00000058668	ATP2B4	ENST00000357681	FSM	4.08267	-0.91407	3.10158	-0.294711	0.768215	0.862074	Not	ATP2B4-PB.456.4-Anno	Annotated	8.51072	5.27317e-06	0.225593	1.27545e-07	1.50789e-05	0.000278603	1.12757	4.66347e-06	9.90323e-05	0	2.4144e-09	5.07577e-07	1.27735e-07	0
PB.456.6	ENSG00000058668	ATP2B4	ENST00000357681	FSM	7518.8	-0.459169	0.178053	-2.57883	0.00991355	0.030153	Not	ATP2B4-PB.456.6-Anno	Annotated	8440.32	6552.91	217.452	163.733	268.145	230.83	213.35	186.017	188.918	114.797	168.303	179.886	190.926	164.753
PB.456.8	ENSG00000058668	ATP2B4	ENST00000341360	ISM	49.9513	-0.956634	3.09958	-0.308633	0.7576	0.860201	Not	ATP2B4-PB.456.8-Anno	Annotated	97.2347	0	8.19878	0	40.9939	0	0	0	0	0	0	0	0	0
PB.456.7	ENSG00000058668	ATP2B4	ENST00000357681	ISM	273.049	9.77616	2.96803	3.29382	0.000988344	0.00419427	Up	ATP2B4-PB.456.7-Anno	Annotated	105.761	450.553	3.11681	13.4173	7.39565e-05	4.42289e-08	0.0093288	11.6972	3.87745	21.9041	2.53874	16.6437	4.45715e-07	25.9999
PB.3528.1	ENSG00000017260	ATP2C1	ENST00000504948	FSM	1141.84	0.63789	0.186039	3.4288	0.000606252	0.00272774	Not	ATP2C1-PB.3528.1-Anno	Annotated	873.338	1433.05	52.7185	84.6043	38.1683	58.934	59.3095	53.4841	53.6964	86.3148	73.319	99.9439	66.9217	96.5219
PB.3528.2	ENSG00000017260	ATP2C1	ENST00000510168	FSM	677.343	-0.775084	0.154974	-5.00138	5.69223e-07	5.21688e-06	Not	ATP2C1-PB.3528.2-Anno	Annotated	829.834	514.843	47.9719	28.9952	51.6169	60.4118	44.8457	41.3873	41.598	21.966	31.0334	32.2148	34.9018	24.8602
PB.3528.3	ENSG00000017260	ATP2C1	novel	NIC	654.648	0.719587	0.202258	3.55777	0.000374012	0.00176993	Not	ATP2C1-PB.3528.3-novel	novel	481.66	841.011	28.4822	48.5729	26.2186	30.9642	24.246	32.807	28.175	52.1986	45.8144	60.004	38.9825	45.8651
PB.2220.1	ENSG00000159199	ATP5MC1	novel	NIC	123.778	-0.0724018	0.212185	-0.341221	0.732937	0.840682	Not	ATP5G1-PB.2220.1-novel	novel	123.096	124.129	16.0342	15.6821	19.7136	16.0031	17.7282	12.6135	14.1126	18.7862	13.231	13.9014	16.4823	16.0095
PB.2881.1	ENSG00000154518	ATP5MC3	ENST00000284727	FSM	6015.7	-0.852892	0.239233	-3.5651	0.000363711	0.00172353	Not	ATP5G3-PB.2881.1-Anno	Annotated	7617.6	4195.6	659.205	360.413	332.056	652.234	507.724	1052.15	751.86	299.6	492.575	244.154	359.597	406.14
PB.276.1	ENSG00000116459	ATP5PB	ENST00000369722	FSM	1180.3	0.554831	0.0710171	7.81264	5.60045e-15	1.59452e-13	Not	ATP5F1-PB.276.1-Anno	Annotated	928.238	1461.62	125.048	189.692	135.645	107.678	148.551	104.421	128.945	183.087	163.028	241.826	160.388	200.131
PB.2188.1	ENSG00000033627	ATP6V0A1	ENST00000264649	FSM	1279.62	-0.924357	0.0986009	-9.37474	6.93494e-21	3.34563e-19	Not	ATP6V0A1-PB.2188.1-Anno	Annotated	1623.76	902.518	87.6168	47.6204	106.855	94.0693	70.981	91.8214	74.3568	44.6852	49.7119	41.6077	61.6392	40.4581
PB.2188.2	ENSG00000033627	ATP6V0A1	ENST00000393829	FSM	480.263	-0.976226	0.221646	-4.40443	1.0606e-05	7.5107e-05	Not	ATP6V0A1-PB.2188.2-Anno	Annotated	620.636	331.282	33.8196	17.5155	42.9225	40.6209	24.3942	36.4205	24.74	17.1432	18.17	22.8221	15.6382	13.8039
PB.1383.1	ENSG00000185344	ATP6V0A2	ENST00000330342	FSM	433.183	0.32804	0.115515	2.83981	0.00451408	0.0153346	Not	ATP6V0A2-PB.1383.1-Anno	Annotated	374.4	497	27.9236	35.9354	33.002	30.0301	30.5939	23.4179	22.5743	40.5253	34.8075	39.0832	30.1556	35.1053
PB.3482.1	ENSG00000114573	ATP6V1A	ENST00000273398	FSM	1498.25	0.350654	0.161045	2.17736	0.0294536	0.0750053	Not	ATP6V1A-PB.3482.1-Anno	Annotated	1283.17	1730.84	98.7365	128.843	127.014	100.869	78.9302	84.6562	102.213	124.632	114.26	155.247	126.347	123.727
PB.4733.1	ENSG00000147416	ATP6V1B2	ENST00000276390	FSM	2193.88	-0.0385075	0.160945	-0.239259	0.810905	0.884808	Not	ATP6V1B2-PB.4733.1-Anno	Annotated	2157.4	2239	171.25	172.267	199.373	178.679	143.009	175.977	159.214	153.393	165.683	214.623	159.93	167.704
PB.4874.1	ENSG00000155097	ATP6V1C1	ENST00000518738	FSM	1823.26	0.173742	0.103161	1.68417	0.0921483	0.186672	Not	ATP6V1C1-PB.4874.1-Anno	Annotated	1666.85	1996.93	64.9057	75.4983	72.886	56.2781	65.2863	66.3633	63.7149	76.0586	74.0447	87.7998	69.4938	70.0944
PB.2384.1	ENSG00000081923	ATP8B1	novel	NIC	804.079	-0.256312	0.137748	-1.86073	0.0627828	0.137155	Not	ATP8B1-PB.2384.1-novel	novel	850.068	752.125	150.355	128.355	188.767	115.078	168.187	130.196	149.549	132.589	127.677	108.502	142.828	130.177
PB.2405.1	ENSG00000166377	ATP9B	ENST00000307671	FSM	576.681	-0.353503	0.164094	-2.15428	0.0312183	0.0785488	Not	ATP9B-PB.2405.1-Anno	Annotated	630.6	520.4	32.1194	25.9078	31.2527	29.6334	40.8647	26.6744	32.1719	32.0773	21.5543	23.9137	27.6352	24.3583
PB.3028.1	ENSG00000088812	ATRN	ENST00000446916	FSM	1860.56	-0.0146348	0.0851268	-0.171918	0.863502	0.917248	Not	ATRN-PB.3028.1-Anno	Annotated	1828.15	1909.47	99.117	100.204	115.413	93.7224	122.373	79.2867	84.7898	97.7983	104.184	113.304	101.734	83.9974
PB.3278.1	ENSG00000130638	ATXN10	ENST00000252934	FSM	1066.26	0.200453	0.110834	1.80858	0.070516	0.150453	Not	ATXN10-PB.3278.1-Anno	Annotated	962.932	1193.1	78.0632	93.2897	83.5679	64.386	92.0964	70.4627	79.8032	86.8943	86.1454	130.506	83.6145	79.2883
PB.1254.1	ENSG00000253719	ATXN7L3B	ENST00000519948	FSM	1377.58	-0.518791	0.117435	-4.41769	9.97612e-06	7.11541e-05	Not	ATXN7L3B-PB.1254.1-Anno	Annotated	1589	1162.2	98.2085	69.7683	103.634	85.5941	129.961	78.546	93.3072	77.1416	68.5022	70.5124	70.7406	61.9447
PB.4487.1	ENSG00000105778	AVL9	ENST00000318709	FSM	1041.97	0.301693	0.101024	2.98636	0.00282317	0.0103224	Not	AVL9-PB.4487.1-Anno	Annotated	907.799	1183.83	28.513	36.27	30.3733	23.7262	32.8238	27.1766	28.4652	43.6407	30.4758	35.4147	34.8958	36.9231
PB.1886.1	ENSG00000103126	AXIN1	ENST00000354866	FSM	427.843	-0.45377	0.0967653	-4.68939	2.74027e-06	2.19823e-05	Not	AXIN1-PB.1886.1-Anno	Annotated	482.4	372.4	33.21	24.7692	43.4881	33.4781	35.695	27.4004	25.9883	26.7769	26.0677	28.3233	22.6773	20.0009
PB.2545.2	ENSG00000167601	AXL	ENST00000301178	FSM	3954.52	-1.41032	0.17758	-7.94191	1.99098e-15	5.86075e-14	Not	AXL-PB.2545.2-Anno	Annotated	5565.03	2281.78	386.952	153.238	474.688	323.29	450.401	371.956	314.427	108.882	160.936	189.868	201.082	105.421
PB.3341.1	ENSG00000163512	AZI2	ENST00000479665	FSM	513.906	-0.44006	0.190874	-2.3055	0.0211386	0.0570734	Not	AZI2-PB.3341.1-Anno	Annotated	578.138	447.835	59.1601	44.0492	86.8607	37.391	62.5767	57.3378	51.6343	49.7671	47.98	48.442	43.6447	30.4124
PB.3341.2	ENSG00000163512	AZI2	ENST00000479665	FSM	343.784	1.14446	1.18658	0.964499	0.334796	0.493282	Not	AZI2-PB.3341.2-Anno	Annotated	259.262	431.765	28.0469	46.4768	0	31.8648	34.3003	32.2399	41.8295	35.5882	43.6311	43.8412	50.1612	59.1624
PB.4875.1	ENSG00000155096	AZIN1	ENST00000337198	FSM	189.997	-0.0729676	0.278316	-0.262175	0.793187	0.87855	Not	AZIN1-PB.4875.1-Anno	Annotated	186.836	192.828	9.94472	9.92581	14.7299	6.50518	8.00878	10.4295	10.0502	7.1788	5.3745	10.2523	13.7772	13.0462
PB.4875.3	ENSG00000155096	AZIN1	ENST00000337198	FSM	26.7977	-1.75877	2.98998	-0.588221	0.556384	0.695874	Not	AZIN1-PB.4875.3-Anno	Annotated	38.5155	15.1764	2.03724	0.778886	2.03759e-08	8.93319e-06	5.96293	4.22325	1.21365e-05	1.92723e-08	3.8915	0	0.00230412	0.000626226
PB.4875.4	ENSG00000155096	AZIN1	ENST00000347770	FSM	1649.12	-0.186969	0.170845	-1.09437	0.273791	0.428384	Not	AZIN1-PB.4875.4-Anno	Annotated	1704.63	1601.56	88.548	80.8068	92.5831	78.2252	80.4104	106.961	84.5601	74.5867	69.0809	108.707	73.8097	77.8502
PB.4875.6	ENSG00000155096	AZIN1	ENST00000684566	FSM	167.171	0.69466	0.34374	2.02089	0.0432914	0.10226	Not	AZIN1-PB.4875.6-Anno	Annotated	127.532	208.298	6.66429	10.5185	10.1464	8.27491	5.54093	6.30918	3.05	9.54203	12.5302	10.1147	8.28841	12.1173
PB.4875.7	ENSG00000155096	AZIN1	ENST00000337198	FSM	1887.75	-0.665129	0.106391	-6.25176	4.05853e-10	6.32167e-09	Not	AZIN1-PB.4875.7-Anno	Annotated	2247.29	1502.54	178.047	116.064	181.189	203.497	161.867	183.575	160.108	97.9634	120.883	130.306	127.526	103.639
PB.3592.1	ENSG00000169255	B3GALNT1	ENST00000320474	FSM	329.724	-0.117628	0.107199	-1.09729	0.272515	0.426869	Not	B3GALNT1-PB.3592.1-Anno	Annotated	336	327.4	23.1318	21.8228	20.619	19.8974	31.8886	19.9125	23.3414	19.4218	20.9292	27.1601	19.0951	22.5081
PB.532.1	ENSG00000162885	B3GALNT2	ENST00000366600	FSM	911.799	-0.259925	0.138222	-1.88048	0.0600425	0.132586	Not	B3GALNT2-PB.532.1-Anno	Annotated	968.262	855.8	45.4795	39.125	48.1529	53.3035	45.8787	42.2468	37.8156	35.2513	34.911	47.0184	40.4646	37.9798
PB.1426.1	ENSG00000187676	B3GLCT	ENST00000343307	FSM	304.453	-0.0436492	0.153572	-0.284226	0.776237	0.867699	Not	B3GLCT-PB.1426.1-Anno	Annotated	301.491	308.132	19.243	19.1665	22.6241	15.8125	19.2647	24.0555	14.4584	23.2381	19.0742	20.5602	19.6285	13.3316
PB.1426.2	ENSG00000187676	B3GLCT	ENST00000343307	FSM	113.704	0.627569	0.606276	1.03512	0.300613	0.457872	Not	B3GLCT-PB.1426.2-Anno	Annotated	114.109	116.868	5.95917	5.89235	0.320818	4.20442	12.7409	1.12415	11.4056	3.23793	3.6971	8.85738	3.90841	9.76095
PB.3621.1	ENSG00000176597	B3GNT5	ENST00000326505	FSM	518.348	0.461729	0.351107	1.31507	0.188487	0.323394	Not	B3GNT5-PB.3621.1-Anno	Annotated	458.849	569.736	24.3481	30.085	20.2523	44.5616	7.39102	27.2642	22.2712	34.4238	27.4956	26.3926	31.0488	31.0641
PB.3621.2	ENSG00000176597	B3GNT5	ENST00000326505	FSM	122.021	1.95823	0.962568	2.03438	0.0419132	0.0997503	Not	B3GNT5-PB.3621.2-Anno	Annotated	65.8102	184.085	3.60736	9.89754	3.33393e-08	9.53852	4.11152	0.0377102	4.34904	6.34561e-08	5.65485	15.702	6.52553	21.6053
PB.3621.3	ENSG00000176597	B3GNT5	ENST00000460419	FSM	74.9182	-0.24631	0.545218	-0.451765	0.651439	0.773641	Not	B3GNT5-PB.3621.3-Anno	Annotated	80.6946	68.6057	4.25696	3.46732	7.51133	2.18752	6.32445	2.19362	3.06786	4.58042	5.01528	1.39649	2.61021	3.73421
PB.3621.4	ENSG00000176597	B3GNT5	ENST00000460419	FSM	29.5005	-5.97647	2.96978	-2.01243	0.0441746	0.103887	Not	B3GNT5-PB.3621.4-Anno	Annotated	25.0465	34.7727	1.38867	1.81686	2.87218	1.66463	0	2.40655	0	0	0	3.44979	0	5.63452
PB.2007.1	ENSG00000237172	B3GNT9	ENST00000449549	FSM	432.97	-0.21127	0.161356	-1.30934	0.190418	0.326063	Not	B3GNT9-PB.2007.1-Anno	Annotated	457	411	38.8921	33.6229	56.134	32.1887	47.9833	29.6492	28.5056	33.8913	34.8142	36.755	36.7293	25.9246
PB.4962.1	ENSG00000086062	B4GALT1	ENST00000379731	FSM	6194.77	0.619564	0.273614	2.26437	0.0235514	0.062471	Not	B4GALT1-PB.4962.1-Anno	Annotated	4653.4	7946.15	255.717	421.514	289.431	315.119	182.88	235.513	255.643	385.108	404.955	670.503	253.633	393.371
PB.4962.2	ENSG00000086062	B4GALT1	ENST00000379731	FSM	1962.04	-0.765066	0.48914	-1.56411	0.117793	0.226114	Not	B4GALT1-PB.4962.2-Anno	Annotated	2066.51	1801.17	114.697	99.6821	162.174	56.6275	80.716	191.77	82.1993	142.438	61.7803	43.1078	244.43	6.65395
PB.3169.1	ENSG00000182240	BACE2	ENST00000330333	FSM	824.455	0.34018	0.0978119	3.4779	0.000505354	0.00231729	Not	BACE2-PB.3169.1-Anno	Annotated	710	957	88.1496	114.475	90.8343	64.6288	111.94	79.3222	94.0227	109.132	102.878	147.321	95.9991	117.046
PB.3148.1	ENSG00000156273	BACH1	ENST00000286800	FSM	1575.1	0.560425	0.22061	2.54034	0.0110745	0.0332043	Not	BACH1-PB.3148.1-Anno	Annotated	1255.47	1898.97	47.6176	71.0487	29.7962	67.0839	42.9982	51.1992	47.0104	65.8078	70.0964	68.0735	56.9194	94.3466
PB.3148.2	ENSG00000156273	BACH1	ENST00000286800	FSM	955.775	0.0910352	0.425257	0.214071	0.830491	0.897965	Not	BACH1-PB.3148.2-Anno	Annotated	886.202	1045.26	35.4288	40.1537	49.885	35.2403	13.2016	37.1463	41.6706	27.6662	35.4679	71.3431	40.019	26.2723
PB.4964.1	ENSG00000107262	BAG1	ENST00000379704	FSM	695.827	-0.355089	0.165875	-2.14071	0.0322978	0.0807677	Not	BAG1-PB.4964.1-Anno	Annotated	765.367	620.072	81.8	64.6031	88.6917	112.628	77.9496	62.4037	67.3271	69.1124	60.1326	67.6719	67.5621	58.5365
PB.4277.1	ENSG00000112208	BAG2	ENST00000370693	FSM	607.707	0.484269	0.159892	3.02872	0.00245592	0.00917765	Not	BAG2-PB.4277.1-Anno	Annotated	497.69	731.754	33.2392	46.9285	43.8738	20.3378	40.7008	29.8868	31.3971	39.5398	37.5705	57.791	46.8071	52.9342
PB.791.1	ENSG00000151929	BAG3	ENST00000369085	FSM	6598.92	-0.182416	0.179136	-1.01831	0.30853	0.466963	Not	BAG3-PB.791.1-Anno	Annotated	6835.2	6363.2	663.292	600.948	675.068	881.589	554.678	669.769	535.356	581.145	646.007	764.87	498.388	514.332
PB.4775.1	ENSG00000156735	BAG4	ENST00000287322	FSM	959.137	-0.2633	0.0988138	-2.66461	0.00770776	0.0244278	Not	BAG4-PB.4775.1-Anno	Annotated	1017.14	894.895	53.2579	45.7564	55.7468	52.6258	48.9891	57.2936	51.6344	48.4838	45.4387	47.6824	45.5783	41.5988
PB.1703.1	ENSG00000166170	BAG5	ENST00000299204	FSM	985.856	-0.377558	0.118257	-3.19269	0.00140956	0.00564716	Not	BAG5-PB.1703.1-Anno	Annotated	1087.27	884.235	58.0767	45.9085	58.0564	62.2332	69.6587	46.2153	54.22	45.2496	39.3633	51.4802	42.4591	50.9903
PB.1703.2	ENSG00000166170	BAG5	ENST00000299204	FSM	137.335	-0.0324468	0.955566	-0.0339556	0.972913	0.985479	Not	BAG5-PB.1703.2-Anno	Annotated	104.714	167.921	5.26516	8.47416	4.6301	4.04526	4.34305	10.1401	3.16731	16.3625	11.2871	3.87367	10.8476	0
PB.1703.3	ENSG00000166170	BAG5	ENST00000299204	FSM	7.30986	-0.0922021	3.04624	-0.0302675	0.975854	0.98593	Not	BAG5-PB.1703.3-Anno	Annotated	3.80635	10.6386	0.204196	0.588375	4.94549e-08	2.63498e-07	6.38139e-09	0.0033105	1.01767	2.93731	0.000398158	3.22124e-05	0.00304549	0.00108963
PB.1703.4	ENSG00000166170	BAG5	ENST00000299204	FSM	32.8621	2.77281	1.93094	1.43599	0.151005	0.273756	Not	BAG5-PB.1703.4-Anno	Annotated	24.0086	44.1647	2.34447	4.27023	0	11.2572	0	0.465134	0	0	2.15484	12.9987	1.95998	4.23765
PB.2304.1	ENSG00000175866	BAIAP2	ENST00000321280	FSM	758.622	-0.547334	0.128615	-4.2556	2.0849e-05	0.000136174	Not	BAIAP2-PB.2304.1-Anno	Annotated	870.164	632.721	97.337	68.9241	121.157	95.3853	95.1808	93.3635	81.5984	72.135	71.7005	50.209	82.3058	68.2704
PB.2059.1	ENSG00000172530	BANP	ENST00000355022	FSM	150.617	-0.182541	0.435621	-0.419036	0.67519	0.793394	Not	BANP-PB.2059.1-Anno	Annotated	161.512	136.618	19.171	16.22	7.38322	18.9922	19.2862	34.7625	15.4306	19.4008	13.7916	10.7344	17.5708	19.6025
PB.2059.3	ENSG00000172530	BANP	ENST00000682872	FSM	116.028	0.498557	0.61093	0.816063	0.414464	0.571591	Not	BANP-PB.2059.3-Anno	Annotated	117.935	114.971	13.679	12.355	36.683	3.95296	19.7041	3.44465	4.61005	13.0655	15.4783	9.21616	12.0042	12.0108
PB.2059.5	ENSG00000172530	BANP	ENST00000393208	FSM	4.95994	-0.101446	3.05422	-0.033215	0.973503	0.985479	Not	BANP-PB.2059.5-Anno	Annotated	8.62097	1.25787	1.15196	0.139376	5.75929	0	0.000521174	0	0	0	1.59039e-06	0.696876	3.13155e-08	2.14097e-09
PB.3417.1	ENSG00000163930	BAP1	ENST00000460680	FSM	1032.31	-0.0765052	0.0861737	-0.887802	0.374647	0.532353	Not	BAP1-PB.3417.1-Anno	Annotated	1034.6	1032.4	64.5129	62.3507	81.9746	62.4814	71.1121	50.8325	56.1641	66.7902	61.7022	64.5919	63.2117	55.4574
PB.2952.1	ENSG00000138376	BARD1	ENST00000260947	FSM	287.808	0.20643	0.143126	1.44229	0.14922	0.271156	Not	BARD1-PB.2952.1-Anno	Annotated	261.2	317.6	22.9289	27.181	18.9379	26.9238	25.948	20.0719	22.7629	24.5159	25.7062	32.2098	26.4431	27.0302
PB.3909.1	ENSG00000176788	BASP1	ENST00000322611	FSM	3296.71	0.866677	0.158508	5.46771	4.55895e-08	5.20905e-07	Not	BASP1-PB.3909.1-Anno	Annotated	2255	4443	330.462	627.55	398.329	286	315.033	356.568	296.381	584.153	632.897	845.724	592.404	482.57
PB.1208.1	ENSG00000076108	BAZ2A	novel	NIC	2327.22	-0.441645	0.108376	-4.07514	4.59874e-05	0.000277081	Not	BAZ2A-PB.1208.1-novel	novel	2604	2038.8	227.77	172.888	271.094	232.693	214.538	210.081	210.443	176.624	157.363	203.075	170.887	156.49
PB.775.1	ENSG00000214413	BBIP1	novel	NIC	117.776	-0.401909	0.305249	-1.31666	0.187953	0.322955	Not	BBIP1-PB.775.1-novel	novel	134.2	102.2	15.9192	11.6608	18.129	10.0964	26.9312	10.0907	14.3486	12.0225	10.9843	12.0295	13.4381	9.82965
PB.965.2	ENSG00000174483	BBS1	ENST00000318312	FSM	406.664	-1.28007	0.299907	-4.2682	1.97055e-05	0.000129634	Not	BBS1-PB.965.2-Anno	Annotated	554.817	249.879	37.0813	16.2694	44.6368	30.4856	47.348	27.1138	35.8224	16.3034	20.3048	10.9875	23.809	9.94195
PB.1259.1	ENSG00000179941	BBS10	novel	NIC	180.893	-0.298332	0.30504	-0.978007	0.328071	0.486054	Not	BBS10-PB.1259.1-novel	novel	198.005	165.223	11.3906	9.13799	14.2761	8.04285	18.2705	7.0325	9.33124	7.39457	6.82392	9.12082	9.9127	12.4379
PB.1259.2	ENSG00000179941	BBS10	ENST00000650064	FSM	91.8082	-0.87321	1.03221	-0.845962	0.397574	0.554942	Not	BBS10-PB.1259.2-Anno	Annotated	108.195	72.1771	7.10443	4.78029	1.46222	14.093	4.75878	8.38463	6.82351	6.0917	8.95245	3.53284	5.32448	1.22071e-06
PB.3835.1	ENSG00000181004	BBS12	ENST00000314218	FSM	74.926	0.395593	0.254244	1.55596	0.119718	0.228925	Not	BBS12-PB.3835.1-Anno	Annotated	62.6	88.8	4.41148	6.04467	4.78308	4.13042	5.02121	3.46671	4.65597	6.65847	5.52825	7.57693	3.99989	6.45979
PB.1991.1	ENSG00000125124	BBS2	ENST00000245157	FSM	468.937	-0.83825	0.199835	-4.1947	2.73227e-05	0.000173027	Not	BBS2-PB.1991.1-Anno	Annotated	592.4	342.2	50.0759	28.0359	53.4092	45.4584	73.333	32.1742	46.0046	30.786	30.4384	26.1997	29.5309	23.2244
PB.1835.1	ENSG00000140463	BBS4	ENST00000268057	FSM	229.117	0.044354	0.143206	0.309722	0.756773	0.860201	Not	BBS4-PB.1835.1-Anno	Annotated	220.2	240.4	24.3949	25.7673	26.2998	19.0086	31.0895	21.6115	23.9649	24.4339	23.2184	29.4034	29.3315	22.4492
PB.4610.1	ENSG00000075790	BCAP29	ENST00000445771	ISM	118.205	1.55005	0.245311	6.31873	2.63727e-10	4.29066e-09	Not	BCAP29-PB.4610.1-Anno	Annotated	58.2931	183.671	8.88289	27.1001	6.99393	7.60741	11.8533	8.31754	9.6423	27.2638	20.9439	35.1531	19.7551	32.3844
PB.4610.2	ENSG00000075790	BCAP29	ENST00000465919	FSM	207.875	1.07399	0.252801	4.24837	2.1533e-05	0.000139803	Not	BCAP29-PB.4610.2-Anno	Annotated	130.712	289.416	17.0865	36.8975	15.7662	16.4668	11.3175	21.6625	20.2196	29.2419	32.6343	41.0329	32.9871	48.5915
PB.4610.3	ENSG00000075790	BCAP29	ENST00000005259	FSM	30.9049	2.1389	3.04387	0.702692	0.482248	0.631751	Not	BCAP29-PB.4610.3-Anno	Annotated	0.12654	61.2404	0.00972381	4.58379	0	4.25724e-06	5.27079e-05	0	0.0485621	0.00039398	11.3151	5.51082e-09	0.000271742	11.6032
PB.4610.4	ENSG00000075790	BCAP29	ENST00000005259	FSM	665.994	0.447547	0.111365	4.01873	5.85135e-05	0.000341878	Not	BCAP29-PB.4610.4-Anno	Annotated	553.869	795.872	42.4946	59.1712	38.0321	35.9007	62.1089	36.5134	39.9177	58.388	54.9144	75.8635	59.6143	47.0758
PB.2042.1	ENSG00000050820	BCAR1	ENST00000538440	FSM	1340.05	0.1662	0.171972	0.966438	0.333825	0.49206	Not	BCAR1-PB.2042.1-Anno	Annotated	1231	1450	86.0838	98.1106	124.791	80.5031	62.2065	79.8374	83.0812	102.025	111.204	102.54	102.699	72.0852
PB.240.1	ENSG00000137936	BCAR3	ENST00000260502	FSM	489.848	-0.0577192	0.137024	-0.421235	0.673583	0.792176	Not	BCAR3-PB.240.1-Anno	Annotated	489	491.8	35.0357	34.1403	43.3637	38.5891	36.3125	22.7231	34.1902	39.001	32.3478	36.6113	32.461	30.2806
PB.1131.1	ENSG00000060982	BCAT1	ENST00000539780	FSM	379.824	1.24372	0.329308	3.77676	0.000158882	0.000834913	Not	BCAT1-PB.1131.1-Anno	Annotated	231.22	537.433	11.4875	25.8714	12.7322	3.68054	11.5184	14.1748	15.3319	29.5405	23.8731	27.093	18.6993	30.1513
PB.1131.2	ENSG00000060982	BCAT1	ENST00000539282	FSM	129.786	2.66327	1.15628	2.30331	0.0212616	0.057361	Not	BCAT1-PB.1131.2-Anno	Annotated	39.0779	232.984	1.93885	11.0306	3.18743	0.0028679	1.91693	4.58699	2.76639e-05	13.619	14.3543	20.9199	6.25245	0.0075093
PB.1131.3	ENSG00000060982	BCAT1	ENST00000539282	FSM	213.44	3.67617	1.70956	2.15036	0.0315267	0.0791242	Not	BCAT1-PB.1131.3-Anno	Annotated	72.3038	365.101	3.39822	17.2085	5.49641e-08	2.44753	1.28886e-08	6.21204	8.33153	23.287	12.5679	23.6741	13.152	13.3617
PB.1131.5	ENSG00000060982	BCAT1	ENST00000261192	FSM	315.77	0.797489	0.286284	2.78565	0.005342	0.0177564	Not	BCAT1-PB.1131.5-Anno	Annotated	226.77	413.817	17.0181	29.7412	25.8627	10.8241	12.1961	18.4191	17.7885	26.3315	26.2247	41.8689	25.007	29.2738
PB.1131.4	ENSG00000060982	BCAT1	ENST00000261192	FSM	563.612	12.0623	0.963991	12.5129	6.34526e-36	1.00183e-33	Up	BCAT1-PB.1131.4-Anno	Annotated	0.00965628	1190.7	0.000453875	55.8174	0	0	0	0.00163514	0.00063424	46.0673	13.0042	99.3491	15.5275	105.139
PB.807.1	ENSG00000107949	BCCIP	ENST00000278100	ISM	704.414	0.323139	0.134808	2.39703	0.0165285	0.0466005	Not	BCCIP-PB.807.1-Anno	Annotated	606.666	812.464	84.7892	110.131	87.3025	90.4543	89.0022	77.1419	80.0451	117.962	90.1501	133.618	98.7409	110.185
PB.4294.1	ENSG00000083123	BCKDHB	ENST00000320393	FSM	763.087	-0.24569	0.120682	-2.03585	0.0417657	0.0995016	Not	BCKDHB-PB.4294.1-Anno	Annotated	808.358	716.033	49.4118	42.5193	57.5338	38.0895	59.5657	41.6006	50.2693	49.932	38.9493	39.6018	44.4983	39.615
PB.3059.1	ENSG00000171552	BCL2L1	ENST00000307677	FSM	319.119	-0.526024	0.24151	-2.17806	0.0294016	0.0749003	Not	BCL2L1-PB.3059.1-Anno	Annotated	358.549	274.808	31.8097	23.928	36.2242	21.0504	33.4904	37.8569	30.4266	27.6814	21.7995	17.827	39.488	12.8441
PB.3059.2	ENSG00000171552	BCL2L1	ENST00000676582	FSM	237.076	-0.173829	0.241926	-0.71852	0.472437	0.623129	Not	BCL2L1-PB.3059.2-Anno	Annotated	244.343	228.775	21.8174	19.8051	24.1557	24.077	17.4394	14.3783	29.0368	22.0066	26.356	21.2361	14.9642	14.4626
PB.3059.3	ENSG00000171552	BCL2L1	ENST00000678563	FSM	123.68	-1.6811	0.899251	-1.86944	0.061561	0.13508	Not	BCL2L1-PB.3059.3-Anno	Annotated	164.246	79.7807	15.1043	7.05843	31.3581	12.7944	13.6169	8.65626	9.09596	7.2181	8.15569	5.22537	14.693	0
PB.3059.4	ENSG00000171552	BCL2L1	ENST00000376062	FSM	165.446	0.710221	0.844598	0.840898	0.400405	0.558109	Not	BCL2L1-PB.3059.4-Anno	Annotated	150.052	181.048	13.4932	16.0525	3.87083	8.34627	38.9515	6.38107	9.9162	25.3	17.1661	1.12146	16.4466	20.2281
PB.3059.5	ENSG00000171552	BCL2L1	novel	NNC	32.1221	-2.98574	1.78715	-1.67067	0.0947874	0.19059	Not	BCL2L1-PB.3059.5-novel	novel	45.7801	19.1947	4.22768	1.66633	0	0.793468	2.79752	4.17005	13.3774	0.0471513	0	7.56704	0.717461	0
PB.3059.6	ENSG00000171552	BCL2L1	ENST00000376055	FSM	79.4167	-1.29161	0.757366	-1.7054	0.0881201	0.179891	Not	BCL2L1-PB.3059.6-Anno	Annotated	108.43	50.3941	10.7448	4.6813	21.8997	9.16403	10.5689	2.26436	9.82713	1.88529	6.16709	7.5227	6.76876	1.06265
PB.3190.1	ENSG00000099968	BCL2L13	ENST00000317582	FSM	494.351	-0.135016	0.395375	-0.341489	0.732736	0.840682	Not	BCL2L13-PB.3190.1-Anno	Annotated	520.104	462.006	34.1928	30.3115	10.376	38.7056	45.6937	39.1176	37.0712	35.5147	27.5769	20.8341	38.9185	28.7134
PB.3190.2	ENSG00000099968	BCL2L13	ENST00000317582	FSM	61.1243	1.70406	2.69887	0.631397	0.527781	0.672012	Not	BCL2L13-PB.3190.2-Anno	Annotated	85.8958	38.3943	6.52817	2.46506	32.6406	0.000235031	8.87674e-08	2.45543e-09	0	0.311181	3.11471	8.89943	5.95918e-08	2.19125e-08
PB.1543.1	ENSG00000258643	BCL2L2-PABPN1	ENST00000678502	FSM	819.234	0.3076	0.126747	2.42687	0.0152296	0.0435193	Not	BCL2L2-PABPN1-PB.1543.1-Anno	Annotated	711.973	938.666	133.555	170.04	141.387	146.459	154.893	115.016	110.022	172.554	158.453	196.329	140.622	182.241
PB.1374.1	ENSG00000110987	BCL7A	ENST00000261822	FSM	401.039	-0.528286	0.16384	-3.2244	0.00126239	0.00513455	Not	BCL7A-PB.1374.1-Anno	Annotated	458.8	337.8	27.995	20.1617	29.9799	24.1393	31.6378	25.7236	28.4942	23.8406	19.5846	15.8498	23.9011	17.6324
PB.4372.1	ENSG00000029363	BCLAF1	ENST00000531224	FSM	3824.78	0.179721	0.125393	1.43326	0.151783	0.275023	Not	BCLAF1-PB.4372.1-Anno	Annotated	3486.77	4207.06	138.076	161.744	148.163	116.679	135.925	142.379	147.232	157.888	154.447	199.777	151.855	144.751
PB.4372.2	ENSG00000029363	BCLAF1	ENST00000531224	FSM	820.375	0.464835	0.291791	1.59304	0.111151	0.215496	Not	BCLAF1-PB.4372.2-Anno	Annotated	677.666	969.429	41.8045	59.0882	23.0329	48.0619	47.6663	46.874	43.3873	76.0251	44.8116	58.3418	50.0558	66.2068
PB.4372.3	ENSG00000029363	BCLAF1	ENST00000530767	ISM	463.97	-0.35607	0.144613	-2.46224	0.0138073	0.0402179	Not	BCLAF1-PB.4372.3-Anno	Annotated	506.546	416.255	37.4865	29.9974	43.7358	26.3467	39.6664	39.0541	38.6297	31.102	29.7104	24.8854	35.419	28.87
PB.2965.1	ENSG00000074582	BCS1L	novel	NIC	159.007	-0.0231002	0.204579	-0.112916	0.910097	0.94556	Not	BCS1L-PB.2965.1-novel	novel	157.8	161.2	12.4196	12.2699	13.5759	10.3742	17.3195	8.22934	12.5989	13.3751	12.3695	12.0078	11.1222	12.4748
PB.2191.1	ENSG00000126581	BECN1	ENST00000590099	FSM	520.107	0.445693	0.0875038	5.09341	3.51673e-07	3.32391e-06	Not	BECN1-PB.2191.1-Anno	Annotated	427.4	618.8	63.9662	89.8163	68.5477	57.7063	66.3103	63.696	63.5707	92.9103	80.7763	94.8974	87.4562	93.0413
PB.4007.1	ENSG00000132840	BHMT2	ENST00000255192	FSM	296.549	-0.733934	0.182216	-4.02782	5.62953e-05	0.000330586	Not	BHMT2-PB.4007.1-Anno	Annotated	362.144	227.553	42.2861	25.6654	54.4086	30.8371	52.8626	33.4367	39.8853	28.2813	24.0682	22.515	29.0148	24.4475
PB.5023.2	ENSG00000185963	BICD2	ENST00000375512	FSM	238.057	-8.95256	1.68672	-5.30766	1.11041e-07	1.19228e-06	Down	BICD2-PB.5023.2-Anno	Annotated	419.676	42.1588	22.5855	2.28327	40.2064	26.9827	13.254	10.5357	21.9486	11.2725	0	1.26381e-05	0.143887	0
PB.5023.1	ENSG00000185963	BICD2	ENST00000375512	FSM	1699.13	-0.0129174	0.234793	-0.0550159	0.956126	0.974788	Not	BICD2-PB.5023.1-Anno	Annotated	1683.92	1714.84	79.324	78.9167	80.9329	120.082	70.5249	69.6389	55.4416	68.0731	67.3393	90.8824	76.4188	91.8699
PB.3187.1	ENSG00000015475	BID	ENST00000622694	FSM	275.036	0.716276	0.226007	3.16926	0.00152827	0.0060564	Not	BID-PB.3187.1-Anno	Annotated	203.8	351.4	23.5332	39.178	29.7494	16.345	19.6301	28.6437	23.2978	37.7641	35.7793	45.7724	33.4042	43.1701
PB.2816.1	ENSG00000136717	BIN1	ENST00000393040	FSM	625.279	-0.321269	0.165797	-1.93772	0.0526572	0.119429	Not	BIN1-PB.2816.1-Anno	Annotated	676.2	576.6	76.7151	63.0322	91.1739	51.973	78.2067	81.0244	81.1976	64.8344	56.1866	82.7874	53.1871	58.1657
PB.4741.1	ENSG00000147439	BIN3	ENST00000276416	FSM	270.581	0.162486	0.148671	1.09292	0.274428	0.429	Not	BIN3-PB.4741.1-Anno	Annotated	248.6	294.4	31.9831	36.6336	35.4197	25.5668	40.0183	28.3293	30.5814	39.5045	32.915	35.5778	33.1163	42.0545
PB.1020.2	ENSG00000110330	BIRC2	novel	NIC	799.053	-0.241451	0.190468	-1.26767	0.204914	0.345184	Not	BIRC2-PB.1020.2-novel	novel	851.766	734.519	36.9189	31.2097	38.6313	22.7311	32.5024	54.3102	36.4193	31.0762	33.5061	25.8151	35.3024	30.3486
PB.1020.3	ENSG00000110330	BIRC2	ENST00000227758	FSM	1244.11	1.1708	0.295483	3.96231	7.42267e-05	0.000426865	Not	BIRC2-PB.1020.3-Anno	Annotated	780.154	1747.63	45.5968	100.598	22.4911	73.7734	42.3394	51.6333	37.7467	82.3577	87.7885	133.542	77.0469	122.253
PB.1020.4	ENSG00000110330	BIRC2	ENST00000532672	FSM	299.45	-3.79188	1.77538	-2.1358	0.0326954	0.0816979	Not	BIRC2-PB.1020.4-Anno	Annotated	480.965	108.001	41.5843	8.91985	38.8693	36.4598	22.3822	60.5384	49.6718	11.1043	8.15369	25.3412	1.03849e-07	1.93845e-05
PB.1515.1	ENSG00000134897	BIVM	ENST00000257336	FSM	2.41017	-2.21507	3.06963	-0.72161	0.470535	0.621506	Not	BIVM-PB.1515.1-Anno	Annotated	4.72741	0	0.377855	0	0	0.911515	0.977761	0	0	0	0	0	0	0
PB.1515.2	ENSG00000134897	BIVM	ENST00000257336	FSM	178.92	0.492098	0.205994	2.3889	0.016899	0.0474741	Not	BIVM-PB.1515.2-Anno	Annotated	146.071	215.114	11.2333	15.9508	14.2409	7.4963	10.5703	8.0641	15.7948	16.9602	10.3984	19.302	15.9677	17.1255
PB.1515.3	ENSG00000134897	BIVM	novel	NIC	46.5163	-0.296258	0.526178	-0.563037	0.57341	0.709435	Not	BIVM-PB.1515.3-novel	novel	50.7834	42.2178	4.14487	3.38658	1.30938	2.63893	6.60521	4.23339	5.93743	2.77375	1.77355	2.62203	3.04615	6.7174
PB.1515.4	ENSG00000134897	BIVM	novel	NIC	165.925	-0.20301	0.298336	-0.680475	0.496204	0.644564	Not	BIVM-PB.1515.4-novel	novel	170.339	160.751	13.1747	12.1138	11.512	11.1897	17.7228	14.9594	10.4897	9.22589	20.0857	9.57784	11.8132	9.86637
PB.1058.7	ENSG00000259571	BLID	ENST00000560104	FSM	39.8298	-1.03478	0.475854	-2.17457	0.0296622	0.0754811	Not	BLID-PB.1058.7-Anno	Annotated	52.4	26.6	7.61807	3.72999	8.64497	3.68666	9.73304	7.90917	8.1165	2.78064	4.40967	3.31293	4.53624	3.61045
PB.1766.1	ENSG00000104164	BLOC1S6	ENST00000567461	FSM	160.263	0.236348	0.29003	0.81491	0.415124	0.571792	Not	BLOC1S6-PB.1766.1-Anno	Annotated	143.562	178.306	18.4622	22.1616	23.419	24.8017	15.7332	12.7779	15.5793	24.6342	16.505	25.6032	16.3332	27.7323
PB.1766.2	ENSG00000104164	BLOC1S6	ENST00000220531	FSM	1611.1	0.483982	0.11178	4.32976	1.49273e-05	0.000101369	Not	BLOC1S6-PB.1766.2-Anno	Annotated	1304.52	1947.33	76.1436	109.986	86.9521	63.592	81.1961	75.6755	73.3021	103.307	99.0106	131.651	96.2048	119.757
PB.1766.3	ENSG00000104164	BLOC1S6	ENST00000568597	FSM	48.8339	-0.00986818	0.707807	-0.0139419	0.988876	0.993022	Not	BLOC1S6-PB.1766.3-Anno	Annotated	45.8191	53.1807	6.18854	6.76483	9.54033	3.09223	7.74662	5.93215	4.63135	1.10939	9.12413	10.683	7.0182	5.88945
PB.1766.5	ENSG00000104164	BLOC1S6	ENST00000563000	FSM	39.1667	-0.70992	1.21163	-0.585921	0.557928	0.696984	Not	BLOC1S6-PB.1766.5-Anno	Annotated	41.0618	36.0646	5.75848	5.00746	3.65895	3.52668	9.2489	3.27138	9.08649	6.04119	7.28946	1.14409	10.5626	0
PB.398.1	ENSG00000117475	BLZF1	ENST00000367808	FSM	862.294	0.0476048	0.0983976	0.4838	0.628528	0.754386	Not	BLZF1-PB.398.1-Anno	Annotated	826.179	899.922	52.4053	55.4442	61.3966	43.502	61.3137	46.6934	49.1211	60.7503	50.2425	51.9498	56.6482	57.6302
PB.1923.1	ENSG00000166780	BMERB1	ENST00000300006	FSM	873.683	-0.882208	0.119962	-7.35403	1.92314e-13	4.54423e-12	Not	C16orf45-PB.1923.1-Anno	Annotated	1100.6	634.2	127.665	71.7402	113.639	98.8114	140.503	163.567	121.804	53.4807	74.5344	79.7435	92.3182	58.6244
PB.4735.1	ENSG00000168487	BMP1	ENST00000306385	FSM	1552.39	1.10911	0.130972	8.46833	2.48946e-17	8.61602e-16	Not	BMP1-PB.4735.1-Anno	Annotated	962	2201.4	60.3432	132.596	74.0339	48.323	79.767	46.5375	53.0545	117.534	148.123	168.094	112.228	116.999
PB.1596.1	ENSG00000125378	BMP4	ENST00000559087	FSM	1112.92	-2.39422	0.256652	-9.32866	1.07214e-20	5.13665e-19	Down	BMP4-PB.1596.1-Anno	Annotated	1841.2	364.4	274.277	52.9082	195.148	212.258	498.315	261.214	204.449	45.0095	64.5666	49.4013	77.3326	28.231
PB.4493.1	ENSG00000164619	BMPER	ENST00000649409	FSM	35.4793	1.42524	0.582772	2.44563	0.0144599	0.0416817	Not	BMPER-PB.4493.1-Anno	Annotated	20.2	53.2	1.34876	3.41313	0.877558	0.631892	1.90478	0.758889	2.57067	3.05634	2.6861	6.2102	3.04875	2.06425
PB.694.1	ENSG00000107779	BMPR1A	ENST00000372037	FSM	805.585	-0.435825	0.166607	-2.61588	0.00889978	0.0275643	Not	BMPR1A-PB.694.1-Anno	Annotated	907.384	705.972	54.4392	41.1901	53.5192	41.3068	76.9194	45.5817	54.8689	48.0592	35.6445	45.2421	46.903	30.1017
PB.694.2	ENSG00000107779	BMPR1A	novel	NIC	651.903	-0.543218	0.168938	-3.21549	0.00130221	0.00527184	Not	BMPR1A-PB.694.2-novel	novel	750.416	544.228	45.0706	32.0165	34.9585	41.4775	52.1076	54.57	42.2395	23.9489	40.3389	27.1785	32.4854	36.1305
PB.624.1	ENSG00000165733	BMS1	ENST00000374518	FSM	944.077	0.694603	0.103628	6.70286	2.04379e-11	3.80648e-10	Not	BMS1-PB.624.1-Anno	Annotated	699.801	1206.74	36.5316	61.2471	36.3558	35.1441	40.0486	35.4909	35.6184	57.4762	55.253	69.209	54.2676	70.0295
PB.624.2	ENSG00000165733	BMS1	ENST00000374518	ISM	547.372	-0.0428128	0.211332	-0.202585	0.839459	0.90223	Not	BMS1-PB.624.2-Anno	Annotated	541.071	555.857	48.5031	48.7209	40.0154	48.189	63.9475	39.3167	51.0468	66.4306	38.455	48.3744	43.1527	47.1919
PB.4625.1	ENSG00000164603	BMT2	ENST00000297145	FSM	667.559	0.529582	0.184921	2.86382	0.00418566	0.0144286	Not	BMT2-PB.4625.1-Anno	Annotated	532.8	817.8	29.7873	44.5902	23.4188	34.0687	30.9065	34.3203	26.2221	37.0349	41.48	60.4412	37.5622	46.4327
PB.4948.1	ENSG00000173068	BNC2	ENST00000380672	FSM	1110.26	1.34108	0.158606	8.45545	2.78007e-17	9.39403e-16	Not	BNC2-PB.4948.1-Anno	Annotated	611.931	1659.94	35.6535	92.6165	51.8616	30.5352	34.0814	25.1632	36.6261	95.6767	79.5551	130.541	70.5436	86.7663
PB.1798.1	ENSG00000140299	BNIP2	ENST00000607373	FSM	1575.94	-0.0530402	0.132781	-0.399457	0.689557	0.806049	Not	BNIP2-PB.1798.1-Anno	Annotated	1554.55	1604.09	55.47	55.5629	61.4668	51.741	51.6358	55.879	56.6275	48.4229	47.5757	66.5333	51.611	63.6715
PB.1798.2	ENSG00000140299	BNIP2	ENST00000439052	FSM	456.737	-0.0524226	0.155045	-0.338112	0.735279	0.842484	Not	BNIP2-PB.1798.2-Anno	Annotated	451.383	463.191	42.2419	42.077	37.5504	36.0248	40.4523	43.1899	53.9921	34.0998	43.8648	49.524	34.5317	48.3645
PB.1798.3	ENSG00000140299	BNIP2	ENST00000607373	FSM	542.423	0.887406	0.119156	7.44743	9.5173e-14	2.35291e-12	Not	BNIP2-PB.1798.3-Anno	Annotated	372.612	733.254	35.6711	67.8679	35.9207	32.9567	50.051	34.3521	25.075	75.0407	62.0282	92.8516	57.2788	52.1406
PB.814.1	ENSG00000176171	BNIP3	ENST00000368636	FSM	388.003	0.057053	0.170019	0.335568	0.737197	0.844125	Not	BNIP3-PB.814.1-Anno	Annotated	367.2	406.4	57.275	61.5428	64.7333	46.5592	56.3588	66.6369	52.0865	54.776	63.7647	49.2429	65.0505	74.8798
PB.4753.1	ENSG00000104765	BNIP3L	ENST00000380629	FSM	1218.62	-0.523129	0.160736	-3.25458	0.00113558	0.00469019	Not	BNIP3L-PB.4753.1-Anno	Annotated	1400.49	1038.3	96.0507	69.3064	77.7646	82.5492	119.762	105.047	95.1307	66.7058	75.6773	88.9019	65.9163	49.331
PB.4753.2	ENSG00000104765	BNIP3L	ENST00000380629	FSM	462.557	-0.000463787	0.184446	-0.00251449	0.997994	0.998569	Not	BNIP3L-PB.4753.2-Anno	Annotated	449.571	475.935	88.0895	90.2564	104.304	77.4284	75.0953	108.215	75.4044	96.8766	73.3887	103.388	82.316	95.3125
PB.4753.3	ENSG00000104765	BNIP3L	ENST00000380629	FSM	1369.21	-0.0490134	0.161541	-0.303412	0.761576	0.860271	Not	BNIP3L-PB.4753.3-Anno	Annotated	1350.14	1379.97	87.4716	87.1009	94.0755	73.2793	72.6589	110.36	86.9845	65.7167	86.188	86.0723	89.3962	108.131
PB.332.1	ENSG00000163141	BNIPL	ENST00000368926	FSM	185.858	0.248011	0.178452	1.38979	0.164591	0.292359	Not	BNIPL-PB.332.1-Anno	Annotated	164.6	208.8	17.8304	21.9655	17.5174	20.4864	16.7644	16.7748	17.609	17.2354	22.1589	25.7914	20.4147	24.227
PB.4187.1	ENSG00000137274	BPHL	ENST00000380379	FSM	290.015	-0.111501	0.127218	-0.87646	0.38078	0.538644	Not	BPHL-PB.4187.1-Anno	Annotated	292.386	287.462	51.9931	49.5037	58.3083	41.8261	58.9855	47.4625	53.3833	58.0313	43.9	48.0458	52.5237	45.0175
PB.1343.1	ENSG00000089234	BRAP	ENST00000419234	FSM	329.881	0.268707	0.401171	0.669808	0.50298	0.650084	Not	BRAP-PB.1343.1-Anno	Annotated	298.81	364.166	16.691	19.6067	21.883	10.0626	27.0083	17.1517	7.34929	14.0947	16.3355	16.3808	21.5864	29.6362
PB.1343.2	ENSG00000089234	BRAP	ENST00000419234	FSM	206.031	-0.781323	0.721883	-1.08234	0.279102	0.434054	Not	BRAP-PB.1343.2-Anno	Annotated	238.59	175.034	13.7883	9.84451	9.67456	19.5096	10.885	6.64145	22.2307	16.0365	9.40706	18.4768	4.60996	0.692268
PB.4432.1	ENSG00000106009	BRAT1	ENST00000340611	FSM	377.818	-0.606776	0.139154	-4.36045	1.29792e-05	8.93625e-05	Not	BRAT1-PB.4432.1-Anno	Annotated	447.2	306	37.9364	24.9927	59.4749	26.6128	43.6885	30.7423	29.1635	33.3515	23.2331	24.2302	25.7286	18.4202
PB.4220.2	ENSG00000204256	BRD2	ENST00000607833	FSM	7309.96	-1.82158	0.153792	-11.8445	2.29899e-32	2.75364e-30	Not	BRD2-PB.4220.2-Anno	Annotated	11028	3393.48	1070.19	320.09	1104.52	972.264	1222.79	1075.15	976.226	296.121	376.533	355.512	379.897	192.386
PB.4220.4	ENSG00000204256	BRD2	ENST00000607833	FSM	76.421	2.2405	3.0427	0.736355	0.461515	0.613381	Not	BRD2-PB.4220.4-Anno	Annotated	0.0194146	159.305	0.00194398	16.0103	0	0.00971931	0	5.90171e-07	1.93479e-08	0	4.9278e-08	22.61	0	57.4414
PB.5152.1	ENSG00000169925	BRD3	ENST00000303407	FSM	852.969	-0.485922	0.14841	-3.27419	0.00105965	0.00444528	Not	BRD3-PB.5152.1-Anno	Annotated	970	727.6	71.2256	51.8084	93.5837	60.8953	81.7828	57.0658	62.8002	55.3481	51.2792	43.6648	60.6247	48.1253
PB.2480.1	ENSG00000141867	BRD4	ENST00000594841	FSM	2276.94	0.116959	0.106934	1.09376	0.274062	0.428712	Not	BRD4-PB.2480.1-Anno	Annotated	2119.8	2444.8	288.021	322.009	332.407	299.328	267.043	255.799	285.527	329.872	310.09	360.221	334.832	275.03
PB.4101.2	ENSG00000112983	BRD8	ENST00000230901	FSM	104.858	-5.41268	1.42676	-3.79369	0.000148423	0.000787093	Down	BRD8-PB.4101.2-Anno	Annotated	154.393	51.6334	11.0068	3.50934	18.4343	11.1566	13.7006	11.2449	0.4978	6.96214e-08	15.5336	0.000931021	2.01218	6.16942e-09
PB.4101.1	ENSG00000112983	BRD8	novel	NIC	229.842	0.84291	0.230481	3.65717	0.000255015	0.00126632	Not	BRD8-PB.4101.1-novel	novel	164.374	300.091	12.3647	22.0436	8.89821	7.96067	16.3479	11.4408	17.1757	25.0354	17.1276	22.5893	21.3708	24.0951
PB.4101.3	ENSG00000112983	BRD8	novel	NIC	359.186	0.301642	0.284851	1.05895	0.289624	0.445403	Not	BRD8-PB.4101.3-novel	novel	315.032	407.876	22.3547	28.3802	14.5092	23.0503	25.2915	17.2503	31.6722	29.7557	15.1465	33.4284	32.2268	31.3433
PB.1707.1	ENSG00000185024	BRF1	ENST00000547530	FSM	290.92	-0.338782	0.158936	-2.13156	0.0330427	0.0823636	Not	BRF1-PB.1707.1-Anno	Annotated	315.2	264	19.1221	15.6266	21.882	18.5255	21.6674	16.3047	17.2309	17.4501	16.2575	12.924	18.2645	13.2366
PB.1386.1	ENSG00000184992	BRI3BP	ENST00000672415	FSM	242.915	-0.038334	0.22581	-0.169762	0.865197	0.918058	Not	BRI3BP-PB.1386.1-Anno	Annotated	240.846	246.008	22.7594	22.5115	26.2018	18.5714	30.3942	15.9746	22.6548	22.1101	21.8505	21.5809	28.3551	18.661
PB.498.1	ENSG00000162819	BROX	novel	NIC	3604.57	0.228858	0.101076	2.26422	0.0235606	0.0624716	Not	BROX-PB.498.1-novel	novel	3222.73	3989.65	190.116	229.283	207.677	163.53	211.161	178.13	190.083	237.569	229.739	198.243	236.023	244.843
PB.3167.1	ENSG00000185658	BRWD1	ENST00000380800	ISM	977.17	-0.132495	0.134661	-0.983915	0.325157	0.483283	Not	BRWD1-PB.3167.1-Anno	Annotated	993	959.4	77.5511	73.0018	83.174	87.2911	73.8272	68.8744	74.5888	78.2605	60.0485	78.122	70.7053	77.8728
PB.91.1	ENSG00000160058	BSDC1	ENST00000455895	FSM	475.898	-0.0655761	0.178831	-0.366693	0.713848	0.825691	Not	BSDC1-PB.91.1-Anno	Annotated	480.785	468.122	40.0428	37.5126	69.3197	37.128	32.7207	32.2549	28.7908	39.8094	38.8963	34.139	41.5817	33.1368
PB.91.2	ENSG00000160058	BSDC1	ENST00000455895	FSM	431.321	-0.189744	0.14642	-1.29589	0.195015	0.332622	Not	BSDC1-PB.91.2-Anno	Annotated	449.815	412.678	37.4452	33.4865	32.9157	44.8688	43.0334	28.2414	38.1668	34.3316	31.0532	36.2319	30.0045	35.8112
PB.713.1	ENSG00000095564	BTAF1	ENST00000265990	FSM	2518.96	-0.145099	0.157894	-0.918964	0.358114	0.516156	Not	BTAF1-PB.713.1-Anno	Annotated	2575.83	2457.69	77.0032	71.6559	79.4925	97.2808	68.7234	69.9056	69.6135	71.7093	68.3383	81.428	57.7833	79.0205
PB.713.2	ENSG00000095564	BTAF1	novel	NIC	595.579	-0.184383	0.138938	-1.32709	0.184479	0.319118	Not	BTAF1-PB.713.2-novel	novel	617.17	573.306	45.0706	40.8772	38.5411	47.2214	49.195	39.8525	50.5432	44.0416	35.4826	43.7347	36.0049	45.1222
PB.865.1	ENSG00000148925	BTBD10	novel	NIC	53.9293	-0.130557	0.375104	-0.348055	0.727799	0.837716	Not	BTBD10-PB.865.1-novel	novel	54.4	53	9.82037	9.28662	11.0277	9.68941	11.9511	8.98902	7.44463	8.55233	9.42337	6.45548	11.4745	10.5274
PB.3037.1	ENSG00000132640	BTBD3	ENST00000254977	FSM	828.291	0.38447	0.147253	2.61095	0.00902922	0.0278906	Not	BTBD3-PB.3037.1-Anno	Annotated	701.4	964.8	33.9344	45.1897	45.3747	36.4922	28.8767	30.4962	28.4322	47.4147	44.0457	52.1236	38.395	43.9695
PB.454.1	ENSG00000159388	BTG2	ENST00000290551	FSM	4626.8	-1.63055	0.136422	-11.9523	6.31431e-33	8.12325e-31	Not	BTG2-PB.454.1-Anno	Annotated	6723.2	2313	558.597	188.915	727.117	619.695	329.811	643.491	472.872	172.514	200.624	120.453	305.736	145.248
PB.1731.1	ENSG00000156970	BUB1B	ENST00000287598	FSM	313.777	4.23848	0.3318	12.7742	2.28543e-37	3.78021e-35	Up	BUB1B-PB.1731.1-Anno	Annotated	32.8	618.2	2.01714	35.8995	4.07946	1.65058	2.02152	0.968548	1.36557	30.9016	28.1763	48.778	31.2459	40.3957
PB.803.1	ENSG00000154473	BUB3	ENST00000368858	ISM	35.9136	0.0205799	1.00846	0.0204073	0.983718	0.990563	Not	BUB3-PB.803.1-Anno	Annotated	39.607	31.66	2.9191	2.32869	0	2.69918	3.74259	4.72576	3.42799	1.96149	3.31304	2.16249	2.68539	1.52103
PB.803.2	ENSG00000154473	BUB3	ENST00000368858	FSM	434.323	0.254841	0.0960897	2.65211	0.00799896	0.0251784	Not	BUB3-PB.803.2-Anno	Annotated	385.7	488.381	13.0198	15.965	14.429	11.2077	15.4143	10.9334	13.1149	15.9723	14.8104	18.0534	13.2011	17.7878
PB.803.3	ENSG00000154473	BUB3	ENST00000368858	ISM	611.122	0.582017	0.118551	4.90942	9.13438e-07	8.01219e-06	Not	BUB3-PB.803.3-Anno	Annotated	474.612	761.926	29.6014	45.9735	34.7893	25.3048	31.1874	28.4981	28.2274	46.4989	35.3204	57.9765	42.2709	47.8011
PB.803.4	ENSG00000154473	BUB3	ENST00000368865	FSM	450.157	0.733018	0.223653	3.27748	0.0010474	0.00440718	Not	BUB3-PB.803.4-Anno	Annotated	330.569	582.862	38.4374	66.2304	27.2208	46.9222	40.9166	39.8927	37.2346	70.1322	60.0659	90.8425	55.8444	54.2669
PB.2928.1	ENSG00000082153	BZW1	novel	NIC	1216.81	0.155958	0.140559	1.10956	0.267191	0.421092	Not	BZW1-PB.2928.1-novel	novel	1118.65	1327.66	81.8091	94.1494	75.6324	64.2074	99.3406	88.0832	81.7821	69.553	105.084	106.686	88.0278	101.397
PB.2928.2	ENSG00000082153	BZW1	novel	NIC	191.837	1.26369	0.361085	3.49971	0.000465769	0.0021557	Not	BZW1-PB.2928.2-novel	novel	120.581	270.411	8.65469	19.062	4.6287	17.83	9.21414	4.07084	7.52981	16.5464	19.3807	27.5736	18.5698	13.2396
PB.2928.3	ENSG00000082153	BZW1	ENST00000409600	FSM	1519.82	0.707468	0.241999	2.92343	0.00346199	0.0123209	Not	BZW1-PB.2928.3-Anno	Annotated	1157.4	1892.22	88.6129	143.019	68.7454	90.2017	58.4908	140.697	84.9293	150.389	117.336	148.609	140.047	158.713
PB.2928.5	ENSG00000082153	BZW1	ENST00000409600	FSM	2824.91	0.347633	0.228073	1.52422	0.127454	0.239821	Not	BZW1-PB.2928.5-Anno	Annotated	2372.37	3362.68	190.581	260.452	216.299	215.121	177.744	173.976	169.767	248.152	189.447	414.757	186.88	263.022
PB.1002.1	ENSG00000182919	C11orf54	ENST00000354421	FSM	309.622	-0.549185	0.157284	-3.49169	0.000479983	0.00221411	Not	C11orf54-PB.1002.1-Anno	Annotated	355.406	258.953	48.5977	34.6007	51.4504	46.5417	51.709	51.5821	41.7054	36.0833	28.5104	27.9761	44.6078	35.826
PB.1268.1	ENSG00000133641	C12orf29	ENST00000550333	FSM	125.709	-0.11327	0.751784	-0.150668	0.880238	0.92736	Not	C12orf29-PB.1268.1-Anno	Annotated	133.277	116.846	11.2141	9.66147	10.0364	11.9106	0.949497	18.8498	14.3245	13.2356	6.5306	14.3255	4.28482	9.93084
PB.1268.2	ENSG00000133641	C12orf29	ENST00000356891	FSM	241.319	-0.0751466	0.253133	-0.296866	0.766569	0.862074	Not	C12orf29-PB.1268.2-Anno	Annotated	241.123	241.354	19.9154	19.4178	18.1437	23.9263	27.1337	16.9098	13.4638	12.299	22.6376	17.3995	22.7612	21.9916
PB.1095.1	ENSG00000047621	C12orf4	ENST00000261250	FSM	369.825	0.51366	0.132473	3.87748	0.000105544	0.000580533	Not	C12orf4-PB.1095.1-Anno	Annotated	299.031	448.874	17.4627	25.2491	22.3027	12.5395	21.2743	14.0957	17.1013	24.3718	22.255	30.1622	25.617	23.8395
PB.1095.2	ENSG00000047621	C12orf4	ENST00000542080	ISM	37.0739	-0.241245	0.442175	-0.545586	0.58535	0.718831	Not	C12orf4-PB.1095.2-Anno	Annotated	39.5686	34.5263	3.10147	2.60798	4.61189	2.16139	4.39898	1.7915	2.54358	3.85385	2.55689	2.20646	2.64785	1.77483
PB.1368.1	ENSG00000157895	C12orf43	novel	NIC	319.875	-0.249059	0.180167	-1.38237	0.166857	0.295778	Not	C12orf43-PB.1368.1-novel	novel	337.156	300.661	40.7527	35.3235	45.5932	33.4345	48.7428	33.0836	42.9096	45.4554	33.6828	29.9505	37.4294	30.0993
PB.1310.1	ENSG00000204954	C12orf73	novel	NIC	321.078	-0.406725	0.222215	-1.83032	0.0672015	0.144567	Not	C12orf73-PB.1310.1-novel	novel	355.867	283.659	54.5733	42.2158	62.8055	40.8167	72.5262	50.7099	46.0083	51.7032	44.6142	31.3308	48.8273	34.6035
PB.1687.1	ENSG00000227051	C14orf132	ENST00000555004	FSM	729.711	-0.787836	0.119169	-6.61109	3.81494e-11	6.84815e-10	Not	C14orf132-PB.1687.1-Anno	Annotated	903.304	548.675	49.1496	29.0851	50.1259	38.2478	61.5246	54.269	41.5805	26.0714	27.6404	28.746	34.361	28.6068
PB.2370.1	ENSG00000152242	C18orf25	ENST00000619301	FSM	1160.4	-0.0390218	0.135765	-0.287421	0.77379	0.865902	Not	C18orf25-PB.2370.1-Anno	Annotated	1150.4	1173.2	47.8126	47.5098	51.5189	62.0919	44.5892	39.4249	41.4382	48.7714	46.4861	55.2431	43.7816	43.2666
PB.2387.1	ENSG00000166845	C18orf54	ENST00000382911	FSM	234.246	0.896503	0.231138	3.87866	0.000105034	0.000578188	Not	C18orf54-PB.2387.1-Anno	Annotated	160	316	6.42226	12.2763	6.88214	4.37511	7.73251	8.00168	5.11988	10.3557	9.40455	15.7602	10.8112	15.0501
PB.2511.1	ENSG00000131943	C19orf12	ENST00000323670	FSM	262.556	-0.419087	0.12827	-3.26724	0.00108603	0.00452588	Not	C19orf12-PB.2511.1-Anno	Annotated	292.6	233	43.8961	33.7691	46.3071	40.3096	56.8374	38.4153	37.6114	31.0711	35.5359	39.6893	36.3769	26.1724
PB.4445.1	ENSG00000106392	C1GALT1	ENST00000436587	FSM	206.229	-0.0767658	0.497141	-0.154414	0.877283	0.925651	Not	C1GALT1-PB.4445.1-Anno	Annotated	215.443	206.902	9.73242	9.09328	4.26569	16.771	20.0002	3.73676	3.88851	12.0468	5.67205	17.844	7.99497	1.90859
PB.4445.2	ENSG00000106392	C1GALT1	ENST00000436587	FSM	492.071	0.43978	0.368154	1.19455	0.232262	0.379832	Not	C1GALT1-PB.4445.2-Anno	Annotated	431.102	545.772	20.1896	24.7822	31.8247	13.3062	5.45729	26.3702	23.9897	16.9659	27.7674	19.5357	26.421	33.2212
PB.523.1	ENSG00000119280	C1orf198	ENST00000366663	FSM	3541.17	-1.41595	0.141797	-9.98575	1.75967e-23	1.063e-21	Not	C1orf198-PB.523.1-Anno	Annotated	5018.32	1984.55	300.029	115.365	346.158	260.816	313.385	377.928	201.858	87.4557	117.327	131.965	146.692	93.3835
PB.523.2	ENSG00000119280	C1orf198	ENST00000366663	FSM	766.655	-0.637194	0.427544	-1.49036	0.13613	0.252475	Not	C1orf198-PB.523.2-Anno	Annotated	957.679	543.651	62.2254	33.9156	164.583	14.0642	17.482	79.2473	35.7505	43.0347	45.0347	10.0461	54.7487	16.7136
PB.429.1	ENSG00000116667	C1orf21	ENST00000235307	FSM	1085.19	-0.505102	0.104093	-4.85243	1.21959e-06	1.04341e-05	Not	C1orf21-PB.429.1-Anno	Annotated	1236.2	928.2	83.8795	61.2658	75.6158	86.1703	85.4078	75.4496	96.7542	47.3135	60.1648	73.8948	63.8765	61.0795
PB.1100.1	ENSG00000159403	C1R	ENST00000647956	FSM	7539.34	-0.0217422	0.158227	-0.137412	0.890705	0.933856	Not	C1R-PB.1100.1-Anno	Annotated	7428.04	7706.1	674.228	681.973	464.947	559.721	842.466	832.917	671.088	479.375	844.364	805.317	693.685	587.126
PB.1100.2	ENSG00000159403	C1R	ENST00000647956	FSM	5190.24	-1.48231	0.285012	-5.20086	1.98368e-07	2.01471e-06	Not	C1R-PB.1100.2-Anno	Annotated	7321.16	2942.7	750.223	293.715	786.742	556.421	922.714	723.609	761.626	286.63	373.018	265.101	418.329	125.495
PB.1102.1	ENSG00000139178	C1RL	ENST00000266542	FSM	1195.68	-0.664167	0.241125	-2.75445	0.00587904	0.0193014	Not	C1RL-PB.1102.1-Anno	Annotated	1410.61	967.701	112.452	74.978	129.824	85.5	141.799	95.7006	109.437	73.8826	94.0563	62.4357	100.402	44.1136
PB.1101.1	ENSG00000182326	C1S	ENST00000328916	FSM	13737.9	-0.703021	0.150997	-4.65587	3.22612e-06	2.53241e-05	Not	C1S-PB.1101.1-Anno	Annotated	16534.8	10879.8	1355.92	866.232	1189.55	1070.11	1770.27	1454.37	1295.29	600.279	1040.81	994.34	986.297	709.431
PB.3189.1	ENSG00000242259	C22orf39	ENST00000399562	FSM	1100.44	-0.404623	0.143363	-2.82237	0.00476709	0.0160996	Not	C22orf39-PB.3189.1-Anno	Annotated	1227.47	967.553	74.4327	56.8863	96.5421	57.6058	92.8465	62.871	62.2979	65.9641	55.3683	49.288	61.4795	52.3314
PB.2761.1	ENSG00000168887	C2orf68	ENST00000306336	FSM	639.913	-0.236719	0.172811	-1.36982	0.170744	0.300979	Not	C2orf68-PB.2761.1-Anno	Annotated	675.245	601.56	56.54	48.9985	62.1592	43.8831	72.8281	48.5246	55.3048	54.4241	48.9028	39.5801	55.1296	46.9557
PB.2923.1	ENSG00000178074	C2orf69	ENST00000319974	FSM	507.059	0.0206323	0.132631	0.155562	0.876378	0.925399	Not	C2orf69-PB.2923.1-Anno	Annotated	489.2	528	40.5151	42.5958	39.3523	40.7553	43.1429	41.1639	38.1612	44.3713	34.8575	49.2746	40.6562	43.8196
PB.2720.1	ENSG00000212978	C2orf74-DT	ENST00000420918	FSM	264.344	-0.130669	0.155749	-0.838974	0.401484	0.55894	Not	AC016747.3-PB.2720.1-Anno	Annotated	269.056	258.344	41.8589	38.7231	55.4362	30.2767	45.0773	37.0033	41.5008	39.9062	36.703	34.9116	40.9747	41.1199
PB.3830.1	ENSG00000164096	C4orf3	ENST00000504110	FSM	1415.39	-0.688914	0.146568	-4.70031	2.5977e-06	2.10084e-05	Not	C4orf3-PB.3830.1-Anno	Annotated	1694.79	1118.29	284.366	180.826	343.294	222.409	316.904	261.166	278.056	149.073	196.785	176.003	202.309	179.959
PB.3873.1	ENSG00000205208	C4orf46	ENST00000379205	FSM	1174.24	-0.215722	0.214565	-1.00539	0.314708	0.473117	Not	C4orf46-PB.3873.1-Anno	Annotated	1225.6	1125	81.3712	72.6777	80.0102	75.3371	62.2951	104.354	84.8601	62.3987	62.4092	100.955	68.1494	69.4765
PB.3911.1	ENSG00000082213	C5orf22	ENST00000325366	FSM	611.918	0.281733	0.115873	2.4314	0.0150406	0.0430519	Not	C5orf22-PB.3911.1-Anno	Annotated	540.385	690.347	36.5346	45.3151	39.711	34.7599	46.4789	27.3291	34.394	53.2064	42.9522	46.3895	42.6531	41.3741
PB.4097.1	ENSG00000181904	C5orf24	ENST00000394976	FSM	997.097	0.0523277	0.101942	0.513309	0.607735	0.737925	Not	C5orf24-PB.4097.1-Anno	Annotated	953.444	1042.93	111.176	117.418	143.034	106.751	115.167	89.07	101.856	115.858	113.976	119.496	117.88	119.879
PB.4425.1	ENSG00000185127	C6orf120	ENST00000332290	FSM	351.635	-0.777737	0.365802	-2.12611	0.0334938	0.0832195	Not	C6orf120-PB.4425.1-Anno	Annotated	428.14	264.81	22.9981	13.9801	31.1191	24.3079	14.1955	12.4294	32.9387	21.6366	9.24638	9.57313	20.5517	8.8928
PB.4425.2	ENSG00000185127	C6orf120	ENST00000332290	FSM	1.18579	0.783687	3.10668	0.252258	0.800841	0.881382	Not	C6orf120-PB.4425.2-Anno	Annotated	5.06765e-05	2.8711	3.36622e-06	0.170764	0	0	1.65712e-05	0	2.59943e-07	0.000229983	1.13112e-09	0.853567	2.47912e-05	0
PB.4425.3	ENSG00000185127	C6orf120	ENST00000332290	FSM	570.266	0.38712	0.317401	1.21966	0.222596	0.367484	Not	C6orf120-PB.4425.3-Anno	Annotated	510.46	651.119	27.0716	33.3387	17.0081	16.1478	51.8603	34.942	15.3999	26.2968	38.2432	49.3293	21.1274	31.6967
PB.4237.1	ENSG00000198663	C6orf89	ENST00000355190	FSM	891.213	-0.803826	0.233208	-3.44681	0.000567241	0.00257557	Not	C6orf89-PB.4237.1-Anno	Annotated	1091.05	678.764	56.28	33.9139	68.4673	49.234	53.1042	44.5146	66.0799	20.1375	31.1999	36.6469	47.1088	34.4766
PB.4237.2	ENSG00000198663	C6orf89	ENST00000480824	FSM	475.483	0.864267	0.271806	3.17972	0.00147416	0.00586202	Not	C6orf89-PB.4237.2-Anno	Annotated	335.21	630.381	17.1867	31.4106	15.0132	14.0119	32.0278	14.5591	10.3215	47.1439	35.7337	32.8633	21.0414	20.2705
PB.4839.1	ENSG00000253250	C8orf88	ENST00000517562	FSM	680.327	-0.402718	0.0808658	-4.98007	6.35602e-07	5.72701e-06	Not	C8orf88-PB.4839.1-Anno	Annotated	756.804	604.788	52.039	40.3407	52.5543	41.6269	66.0868	45.9041	54.0228	40.4264	33.1328	44.9696	39.6327	43.5419
PB.4839.2	ENSG00000253250	C8orf88	ENST00000517562	FSM	30.3048	0.817424	1.82634	0.447575	0.65446	0.775878	Not	C8orf88-PB.4839.2-Anno	Annotated	43.2991	16.8986	6.9805	2.6741	0	17.1353	3.90398	13.8632	0	1.0841	2.36333	9.02457	0	0.898502
PB.5132.1	ENSG00000136819	C9orf78	novel	NNC	561.995	0.352071	0.164967	2.13419	0.0328276	0.0818862	Not	C9orf78-PB.5132.1-novel	novel	477.841	647.335	91.5543	120.801	89.7938	60.0787	106.306	92.442	109.152	147.585	87.3836	94.1707	141.574	133.292
PB.5132.2	ENSG00000136819	C9orf78	ENST00000372447	FSM	311.068	-0.60912	0.112751	-5.40236	6.5769e-08	7.33383e-07	Not	C9orf78-PB.5132.2-Anno	Annotated	365.399	253.665	69.0506	46.2667	76.4171	75.965	79.8364	52.3116	60.7227	48.2813	48.9141	48.3428	40.4831	45.312
PB.1810.1	ENSG00000074410	CA12	ENST00000344366	FSM	211.927	0.803633	0.490087	1.63978	0.101052	0.200059	Not	CA12-PB.1810.1-Anno	Annotated	171.538	249.986	12.7295	18.7544	4.76587	31.465	9.29196	10.9342	7.19034	25.1416	14.5141	13.0936	23.9714	17.0513
PB.1810.2	ENSG00000074410	CA12	ENST00000344366	FSM	998.375	0.926867	0.235249	3.93993	8.15048e-05	0.00046411	Not	CA12-PB.1810.2-Anno	Annotated	702.105	1311.37	57.5988	104.786	61.7833	97.0612	47.6395	28.6835	52.8266	98.9537	102.448	115.439	95.9129	111.177
PB.2985.1	ENSG00000135932	CAB39	ENST00000258418	FSM	1652.76	0.310079	0.151697	2.04407	0.0409467	0.0979197	Not	CAB39-PB.2985.1-Anno	Annotated	1430.6	1893.6	83.0099	106.891	84.9726	89.1469	75.1479	84.7645	81.0176	99.4098	95.4525	128.396	91.68	119.514
PB.1465.1	ENSG00000102547	CAB39L	ENST00000409308	FSM	580.223	-1.50461	0.289909	-5.18995	2.10346e-07	2.12394e-06	Not	CAB39L-PB.1465.1-Anno	Annotated	844.6	301.6	53.6796	18.8437	33.9483	36.8508	76.7304	54.0235	66.8449	19.0585	21.9887	13.4645	22.9023	16.8046
PB.3206.1	ENSG00000099991	CABIN1	ENST00000398319	ISM	361.424	-0.0114105	0.172873	-0.0660051	0.947374	0.969972	Not	CABIN1-PB.3206.1-Anno	Annotated	353.321	369.112	39.133	39.6454	46.9012	27.4213	48.0439	37.3291	35.9696	43.8658	33.2315	32.3593	43.0017	45.7686
PB.3206.2	ENSG00000099991	CABIN1	ENST00000398319	FSM	1338.63	-0.250274	0.101364	-2.46906	0.0135468	0.0395252	Not	CABIN1-PB.3206.2-Anno	Annotated	1420.8	1255.93	41.2016	35.3162	52.862	34.2562	46.5976	35.0254	37.2669	36.9842	34.6849	36.15	38.7055	30.0565
PB.4557.1	ENSG00000153956	CACNA2D1	ENST00000705962	FSM	1612.25	-0.135126	0.136344	-0.991073	0.32165	0.479617	Not	CACNA2D1-PB.4557.1-Anno	Annotated	1653.6	1584.8	47.5944	44.1989	50.3465	32.6292	59.8024	52.7352	42.4587	35.1786	43.6801	53.2087	47.358	41.5692
PB.2165.1	ENSG00000067191	CACNB1	novel	NIC	575.014	-1.80458	0.11363	-15.8813	8.54144e-57	5.93374e-54	Not	CACNB1-PB.2165.1-novel	novel	866.4	261.2	57.9969	17.0973	70.5856	56.4766	46.4394	72.4807	44.0021	16.5926	19.2248	15.6706	22.0007	11.9978
PB.787.1	ENSG00000151893	CACUL1	ENST00000369151	FSM	446.557	0.0863899	0.106046	0.814645	0.415276	0.571837	Not	CACUL1-PB.787.1-Anno	Annotated	420.2	476	66.7492	73.2273	68.4947	68.1901	71.7434	59.3776	65.9401	77.3935	70.7519	82.1794	61.3221	74.4898
PB.409.1	ENSG00000116161	CACYBP	ENST00000367679	FSM	1561.99	0.435982	0.204183	2.13525	0.0327403	0.0816979	Not	CACYBP-PB.409.1-Anno	Annotated	1291	1868.8	155.722	219.289	128.087	168.927	163.526	183.416	134.655	206.884	197.245	301.789	164.41	226.116
PB.2643.1	ENSG00000084774	CAD	ENST00000264705	FSM	916.845	0.948627	0.128872	7.36101	1.82518e-13	4.32749e-12	Not	CAD-PB.2643.1-Anno	Annotated	613.8	1253.6	18.9167	37.2809	21.078	15.763	24.6669	13.111	19.9645	37.7489	35.4579	49.0706	34.6821	29.4452
PB.1193.1	ENSG00000012822	CALCOCO1	ENST00000550804	FSM	1292.01	-0.649583	0.142793	-4.54913	5.38689e-06	4.01531e-05	Not	CALCOCO1-PB.1193.1-Anno	Annotated	1528.8	1032.2	116.324	76.6087	136.933	124.465	119.643	89.4986	111.079	82.9767	82.2075	59.9794	90.9654	66.9144
PB.4666.1	ENSG00000122786	CALD1	ENST00000361901	FSM	16050.9	1.03923	0.0854681	12.1593	5.12245e-34	6.8434e-32	Not	CALD1-PB.4666.1-Anno	Annotated	10227.4	22323.1	546.087	1154.13	562.115	458.312	578.617	458.342	673.048	1018.66	1087.71	1359.89	999.22	1305.15
PB.4666.10	ENSG00000122786	CALD1	ENST00000424922	FSM	405.408	0.55223	0.395911	1.39483	0.163067	0.290468	Not	CALD1-PB.4666.10-Anno	Annotated	342.467	471.372	18.5994	25.2433	6.8358	32.4457	23.0253	7.04039	23.6497	31.7783	20.6173	25.2688	12.0992	36.4528
PB.4666.2	ENSG00000122786	CALD1	ENST00000424922	FSM	803.859	-0.00854148	0.19536	-0.0437217	0.965126	0.981296	Not	CALD1-PB.4666.2-Anno	Annotated	783.402	825.564	78.1279	80.3318	71.0589	67.7873	86.5445	70.1653	95.0833	95.1837	82.6004	82.6145	83.9191	57.3413
PB.4666.3	ENSG00000122786	CALD1	ENST00000424922	FSM	3.04517	-1.57252	3.09623	-0.50788	0.611537	0.741234	Not	CALD1-PB.4666.3-Anno	Annotated	5.62759	0.000175863	0.491918	1.57902e-05	0	0	0.0488413	0.00198901	2.40876	0	0	0	7.89508e-05	0
PB.4666.4	ENSG00000122786	CALD1	ENST00000424922	FSM	387.831	-2.05839	1.74029	-1.18278	0.236896	0.385143	Not	CALD1-PB.4666.4-Anno	Annotated	513.618	255.286	27.6822	13.1993	41.3181	0.498935	17.6559	49.5635	29.3746	0.136833	19.9506	20.1351	25.7738	1.26543e-06
PB.4666.5	ENSG00000122786	CALD1	ENST00000424922	FSM	106.565	-5.19966	2.99578	-1.73566	0.0826235	0.170829	Not	CALD1-PB.4666.5-Anno	Annotated	202.919	3.28974e-08	10.5863	1.82828e-09	0.000950726	0.0356164	3.99783	48.7407	0.156296	0	0	0	9.14139e-09	0
PB.4666.6	ENSG00000122786	CALD1	novel	NIC	575.861	0.671068	0.200194	3.3521	0.000802022	0.00348011	Not	CALD1-PB.4666.6-novel	novel	446.237	721.003	25.7515	40.5851	15.3156	18.4433	37.6999	31.4723	25.8266	35.5776	36.7961	51.1973	36.5121	42.8425
PB.766.1	ENSG00000138172	CALHM2	novel	NIC	777.672	-0.864252	0.214739	-4.02466	5.70566e-05	0.000334774	Not	CALHM2-PB.766.1-novel	novel	976.6	572.4	93.5768	53.07	103.632	60.4051	121.261	92.5519	90.0331	46.2445	62.3503	56.4381	65.4315	34.8856
PB.1674.1	ENSG00000198668	CALM1	ENST00000356978	FSM	9885.02	-0.148661	0.0998095	-1.48945	0.136369	0.252627	Not	CALM1-PB.1674.1-Anno	Annotated	10122.6	9664.2	531.286	494.708	486.34	555.229	569.271	554.043	491.544	473.447	510.106	569.112	460.707	460.168
PB.2702.1	ENSG00000143933	CALM2	ENST00000460218	FSM	7438.08	0.0971122	0.0983618	0.987296	0.323498	0.481399	Not	CALM2-PB.2702.1-Anno	Annotated	7013.8	7920.6	332.869	366.65	286.523	309.343	372.694	353.982	341.805	339.923	358.684	425.191	352.892	356.558
PB.4645.1	ENSG00000128595	CALU	ENST00000249364	FSM	3384.68	1.35259	0.221093	6.11772	9.49227e-10	1.39414e-08	Not	CALU-PB.4645.1-Anno	Annotated	1875.57	4995.87	111.3	290.244	99.4682	98.9314	95.9318	157.733	104.436	312.773	234.182	338.235	241.355	324.673
PB.4645.3	ENSG00000128595	CALU	ENST00000249364	FSM	5550.21	1.79869	0.0859958	20.9161	3.82432e-97	6.64188e-94	Not	CALU-PB.4645.3-Anno	Annotated	2413.21	8911.2	163.235	582.759	198.103	138.67	172.34	145.834	161.228	556.266	530.978	674.436	568.55	583.562
PB.3822.10	ENSG00000145349	CAMK2D	ENST00000394524	FSM	111.321	-9.04239	2.89913	-3.119	0.00181463	0.00703473	Down	CAMK2D-PB.3822.10-Anno	Annotated	217.004	2.83693	21.1193	0.2602	36.825	26.6498	35.0657	0.00959339	7.04637	1.86683e-06	6.087e-08	1.8006e-07	3.08016e-05	1.30097
PB.3822.1	ENSG00000145349	CAMK2D	ENST00000394524	FSM	1265.54	0.080502	0.118473	0.679494	0.496825	0.644647	Not	CAMK2D-PB.3822.1-Anno	Annotated	1194.02	1357.17	51.7861	57.1332	45.9105	49.3393	58.7047	52.3527	52.6235	49.1884	53.7719	77.9567	48.7979	55.9509
PB.3822.3	ENSG00000145349	CAMK2D	ENST00000394524	FSM	6.54539	2.18878	3.05283	0.716969	0.473393	0.624035	Not	CAMK2D-PB.3822.3-Anno	Annotated	0.0166466	14.2429	0.00100657	0.813739	0	0	0	0	0.00503285	0	0	2.42953	0	1.63916
PB.3822.4	ENSG00000145349	CAMK2D	ENST00000394524	FSM	150.369	1.36358	1.34205	1.01604	0.309608	0.46757	Not	CAMK2D-PB.3822.4-Anno	Annotated	88.1593	206.084	4.457	10.6393	0	0.646705	0.398954	9.76663	11.4727	12.8586	15.7643	0.00213902	14.8712	9.70031
PB.3822.6	ENSG00000145349	CAMK2D	ENST00000394524	FSM	29.6581	-0.635586	3.03417	-0.209476	0.834076	0.89974	Not	CAMK2D-PB.3822.6-Anno	Annotated	26.1851	40.5338	1.60477	2.22532	0.000226242	0	7.88968	0.133957	1.55775e-07	1.18609e-08	0	11.1266	8.01548e-08	3.88609e-05
PB.3822.7	ENSG00000145349	CAMK2D	ENST00000394524	FSM	2.45709	0.794969	3.10296	0.256197	0.797799	0.879147	Not	CAMK2D-PB.3822.7-Anno	Annotated	0	5.72848	0	0.362518	0	0	0	0	0	0	0	1.81259	0	0
PB.3822.9	ENSG00000145349	CAMK2D	ENST00000342666	FSM	321.264	0.280575	0.255273	1.09912	0.271717	0.426099	Not	CAMK2D-PB.3822.9-Anno	Annotated	287.213	357.133	25.9959	31.6862	18.8801	17.3128	28.7418	30.1461	34.8988	34.8405	30.3896	32.7945	35.8992	24.5071
PB.3822.2	ENSG00000145349	CAMK2D	ENST00000342666	FSM	71.6938	10.9767	2.6475	4.14606	3.38243e-05	0.000210553	Up	CAMK2D-PB.3822.2-Anno	Annotated	11.2564	142.674	0.628585	7.91267	0	3.14291	0	0	1.86562e-05	2.44526	0.000474084	20.4776	4.96244e-08	16.6401
PB.680.1	ENSG00000148660	CAMK2G	novel	NIC	312.507	-0.277918	0.178484	-1.5571	0.119447	0.228469	Not	CAMK2G-PB.680.1-novel	novel	337.675	290.025	42.8698	35.4501	47.7902	30.0177	65.6502	35.2484	35.6424	38.7017	37.0135	40.643	34.5575	26.3349
PB.680.2	ENSG00000148660	CAMK2G	ENST00000351293	FSM	39.6038	0.0561227	0.61618	0.0910816	0.927428	0.957032	Not	CAMK2G-PB.680.2-Anno	Annotated	41.7246	36.1746	5.37746	4.67512	4.79062	9.97494	0.739142	7.46026	3.92236	4.96544	3.57498	2.40945	6.86367	5.56208
PB.50.1	ENSG00000162545	CAMK2N1	ENST00000375078	FSM	475.897	-0.415121	0.373936	-1.11014	0.266939	0.420843	Not	CAMK2N1-PB.50.1-Anno	Annotated	507.2	437.4	92.6687	77.0286	130.842	74.6885	114.644	58.9021	84.2664	72.8469	113.518	41.4169	118.67	38.6902
PB.2081.1	ENSG00000004660	CAMKK1	ENST00000348335	FSM	274.337	-0.819292	0.23664	-3.46219	0.0005358	0.002444	Not	CAMKK1-PB.2081.1-Anno	Annotated	343.2	200.4	22.0496	12.4728	34.1426	22.1076	23.8622	17.0026	13.133	15.8649	12.8048	8.76172	12.0779	12.8546
PB.1369.1	ENSG00000110931	CAMKK2	ENST00000402834	FSM	238.133	-1.51729	0.207604	-7.30858	2.69989e-13	6.27295e-12	Not	CAMKK2-PB.1369.1-Anno	Annotated	341.021	130.23	37.165	13.9082	28.7768	35.9008	48.9885	38.5815	33.5775	8.48739	14.4014	12.9373	22.8282	10.8869
PB.1369.2	ENSG00000110931	CAMKK2	ENST00000412367	FSM	123.496	0.675567	0.43253	1.5619	0.118313	0.226924	Not	CAMKK2-PB.1369.2-Anno	Annotated	99.9032	150.916	11.6682	16.4393	26.8279	5.49363	10.1569	4.38412	11.4783	19.2649	18.813	23.2088	11.5128	9.3971
PB.1369.3	ENSG00000110931	CAMKK2	novel	NIC	89.6372	0.852184	1.68027	0.507171	0.612035	0.741508	Not	CAMKK2-PB.1369.3-novel	novel	111.222	67.4275	13.1417	7.82267	9.62831	0.0845891	31.4826	24.5131	0	10.6719	15.129	1.53402e-09	7.82773	5.48469
PB.1369.4	ENSG00000110931	CAMKK2	novel	NIC	119.048	0.831858	1.00075	0.831238	0.405839	0.563873	Not	CAMKK2-PB.1369.4-novel	novel	96.2538	142.427	11.613	16.7445	15.2701	14.3465	0.0143892	7.29018	21.1437	24.1926	7.36956	20.1725	14.3934	17.5947
PB.446.1	ENSG00000118200	CAMSAP2	ENST00000358823	ISM	2938.53	-0.278248	0.154077	-1.80591	0.0709327	0.15111	Not	CAMSAP2-PB.446.1-Anno	Annotated	3125.8	2751.8	170.639	145.987	178.153	189.204	154.399	180.89	150.549	126.642	147.078	186.352	130.515	139.351
PB.1241.1	ENSG00000111530	CAND1	ENST00000545606	FSM	1152.71	0.417842	0.154891	2.69766	0.00698294	0.022386	Not	CAND1-PB.1241.1-Anno	Annotated	961.004	1367	38.997	54.0885	31.2056	45.0441	41.5513	38.6812	38.503	47.4067	48.02	71.0436	45.8236	58.1486
PB.1241.2	ENSG00000111530	CAND1	ENST00000545606	FSM	53.1952	0.858934	2.25212	0.381389	0.702915	0.816949	Not	CAND1-PB.1241.2-Anno	Annotated	64.6588	43.7412	3.24418	2.11626	1.18023e-06	1.12814	13.6783	0.0034353	1.41096	2.83857	7.67731	3.63214e-06	0.0481063	0.017301
PB.1241.4	ENSG00000111530	CAND1	novel	NIC	80.1683	-0.575086	0.327258	-1.75728	0.0788694	0.164457	Not	CAND1-PB.1241.4-novel	novel	93.3395	66.9309	16.2072	11.2796	19.2296	15.6566	23.307	12.8542	9.98877	14.6892	8.76454	10.4969	15.7279	6.71941
PB.1241.5	ENSG00000111530	CAND1	ENST00000545606	FSM	2075.48	0.390327	0.208594	1.87123	0.0613135	0.134707	Not	CAND1-PB.1241.5-Anno	Annotated	1745.1	2441.93	93.1987	126.974	91.3546	118.63	79.3631	87.4819	89.1642	118.135	101.1	169.67	108.093	137.87
PB.1241.6	ENSG00000111530	CAND1	ENST00000539434	FSM	223.816	-0.263201	0.187984	-1.40012	0.161476	0.288597	Not	CAND1-PB.1241.6-Anno	Annotated	237.525	208.119	39.929	33.694	56.8775	29.0993	40.5836	32.3323	40.7523	38.5297	32.9904	27.8119	38.708	30.43
PB.2296.1	ENSG00000171302	CANT1	ENST00000302345	FSM	439.779	0.179587	0.202405	0.887264	0.374937	0.532656	Not	CANT1-PB.2296.1-Anno	Annotated	400.834	479.879	25.6198	29.9433	26.5406	22.5037	34.427	19.922	24.7058	41.4883	25.8912	24.203	28.962	29.1721
PB.2296.2	ENSG00000171302	CANT1	ENST00000392446	FSM	224.897	2.07007	0.906175	2.28441	0.0223475	0.0598721	Not	CANT1-PB.2296.2-Anno	Annotated	119.099	336.071	8.07345	22.1874	13.3932	14.9799	3.82895	8.16528	3.41144e-07	18.0556	20.7272	23.5972	28.9128	19.6442
PB.2296.3	ENSG00000171302	CANT1	ENST00000392446	ISM	55.269	4.91215	2.0966	2.34291	0.0191341	0.0527687	Not	CANT1-PB.2296.3-Anno	Annotated	37.0668	77.0502	2.58704	5.2162	0.153367	0.0135261	4.36902e-09	2.9987	9.76958	6.26688	7.49127	12.0227	9.52819e-05	0.300056
PB.4179.7	ENSG00000127022	CANX	ENST00000247461	FSM	210.612	-9.76699	3.02023	-3.23386	0.00122129	0.00498782	Down	CANX-PB.4179.7-Anno	Annotated	404.572	0.00115353	28.9286	7.94189e-05	79.2458	41.9407	0.00898367	0.000829851	23.4467	0.000103614	0.000145479	1.57816e-08	0.000134288	1.36974e-05
PB.4179.3	ENSG00000127022	CANX	ENST00000247461	FSM	509.378	4.26086	1.36117	3.13028	0.00174638	0.0068043	Up	CANX-PB.4179.3-Anno	Annotated	163.477	849.301	9.34154	49.5574	0.000137522	12.4092	0.0728315	24.7906	9.43489	32.2131	57.8647	15.9254	43.4643	98.3196
PB.4179.6	ENSG00000127022	CANX	ENST00000452673	FSM	90.3302	4.68759	1.54625	3.03158	0.00243275	0.00909596	Up	CANX-PB.4179.6-Anno	Annotated	67.0278	110.655	4.19332	6.50817	12.3847	8.56531	0.00211891	0.00518065	0.00934049	2.12359	14.8044	0.731984	1.73635	13.1445
PB.4179.1	ENSG00000127022	CANX	ENST00000452673	FSM	822.716	0.632008	0.291906	2.1651	0.0303797	0.0769235	Not	CANX-PB.4179.1-Anno	Annotated	646.704	1043.35	36.4548	57.1365	16.2394	21.7166	63.7011	44.7145	35.9022	61.4233	28.7472	101.163	47.0066	47.3427
PB.4179.2	ENSG00000127022	CANX	ENST00000247461	FSM	1263.52	0.307476	0.206738	1.48727	0.136943	0.253488	Not	CANX-PB.4179.2-Anno	Annotated	1066.46	1507.34	56.3328	76.3265	65.7299	43.1599	59.9951	54.7585	58.0204	61.4167	47.0366	129.956	56.5548	86.6686
PB.4179.4	ENSG00000127022	CANX	ENST00000247461	FSM	640.651	0.440646	0.143791	3.0645	0.00218037	0.008259	Not	CANX-PB.4179.4-Anno	Annotated	532.368	760.558	23.7606	33.0627	21.0567	16.7245	24.2403	29.0677	27.7141	28.604	27.2097	42.414	34.9821	32.1039
PB.4179.5	ENSG00000127022	CANX	ENST00000247461	FSM	9256.56	0.732507	0.126166	5.80589	6.40246e-09	8.60307e-08	Not	CANX-PB.4179.5-Anno	Annotated	6725.94	12108.3	355.798	619.592	361.87	291.923	404.341	348.489	372.369	614.862	489.426	880.528	524.807	588.338
PB.4179.8	ENSG00000127022	CANX	ENST00000247461	FSM	1840.89	1.40026	0.382111	3.66453	0.00024779	0.00123575	Not	CANX-PB.4179.8-Anno	Annotated	1068.3	2653.52	94.4513	232.369	25.9719	115.227	128.969	76.916	125.173	267.415	208.332	217.502	244.374	224.222
PB.4179.9	ENSG00000127022	CANX	ENST00000247461	FSM	543.884	0.49119	1.29439	0.379475	0.704335	0.817491	Not	CANX-PB.4179.9-Anno	Annotated	535.355	584.549	29.5038	31.3435	0.000101241	68.8796	34.6947	15.945	27.9995	13.5997	22.3586	87.3738	23.0884	10.2968
PB.119.1	ENSG00000131236	CAP1	ENST00000372797	FSM	393.907	0.486826	0.212274	2.29339	0.0218257	0.0587458	Not	CAP1-PB.119.1-Anno	Annotated	331.997	467.771	34.0123	46.7309	16.1801	30.9689	55.7146	35.0242	32.1738	39.2881	41.2689	63.7017	45.5758	43.82
PB.119.3	ENSG00000131236	CAP1	ENST00000372805	FSM	3769.68	1.16569	0.0855581	13.6246	2.86075e-42	6.65844e-40	Not	CAP1-PB.119.3-Anno	Annotated	2256.2	5419.03	200.177	465.594	204.505	190.128	228.079	174.667	203.504	467.746	403.301	588.104	407.333	461.485
PB.4199.1	ENSG00000112186	CAP2	ENST00000229922	FSM	218.586	-0.630524	0.191009	-3.30101	0.000963366	0.00409578	Not	CAP2-PB.4199.1-Anno	Annotated	255.4	178	20.0169	13.6114	18.6569	16.9081	20.5384	21.7603	22.2206	8.5627	16.1258	11.6394	16.5301	15.199
PB.3313.1	ENSG00000131375	CAPN7	ENST00000253693	FSM	223.295	-1.60217	0.441444	-3.62938	0.000284099	0.00139143	Not	CAPN7-PB.3313.1-Anno	Annotated	317.67	123.718	23.5404	8.91333	33.1096	27.6885	19.4073	15.9078	21.589	14.9014	2.6519	12.1673	10.0183	4.82772
PB.3313.2	ENSG00000131375	CAPN7	ENST00000253693	FSM	868.403	-0.0386046	0.117395	-0.328844	0.742274	0.8484	Not	CAPN7-PB.3313.2-Anno	Annotated	859.73	878.482	51.2032	51.0736	47.3849	45.9025	59.4914	58.4172	44.8201	49.7153	52.2103	52.2645	50.7227	50.4553
PB.888.4	ENSG00000135387	CAPRIN1	ENST00000341394	FSM	434.542	7.33378	1.66606	4.40188	1.07319e-05	7.57668e-05	Up	CAPRIN1-PB.888.4-Anno	Annotated	124.397	792.113	8.24121	49.8199	0	0.110258	29.3125	0.0108925	11.7724	53.7521	36.2819	93.2871	23.3964	42.3823
PB.888.1	ENSG00000135387	CAPRIN1	ENST00000341394	FSM	524.328	0.195388	0.109969	1.77675	0.0756086	0.159131	Not	CAPRIN1-PB.888.1-Anno	Annotated	477.563	575.081	21.3059	25.117	16.9598	21.0218	23.2438	23.4683	21.8358	22.4585	22.9011	28.1122	27.0146	25.0988
PB.888.2	ENSG00000135387	CAPRIN1	ENST00000389645	FSM	640.9	-0.0687545	0.115298	-0.596318	0.550963	0.692642	Not	CAPRIN1-PB.888.2-Anno	Annotated	638.626	643.857	40.4323	39.738	40.7183	45.4455	40.3037	39.1038	36.5901	39.9709	37.5259	44.7158	37.882	38.5952
PB.888.3	ENSG00000135387	CAPRIN1	ENST00000341394	FSM	291.791	1.25107	1.30462	0.958959	0.337579	0.495911	Not	CAPRIN1-PB.888.3-Anno	Annotated	202.166	377.128	10.881	20.289	3.76803e-05	11.6001	22.6198	8.09301	12.0922	7.55961	41.7608	2.82632	41.281	8.01741
PB.888.5	ENSG00000135387	CAPRIN1	ENST00000532820	FSM	3984.93	0.272764	0.177172	1.53954	0.123672	0.234869	Not	CAPRIN1-PB.888.5-Anno	Annotated	3485.25	4558.9	191.023	242.237	203.17	194.362	184.067	199.631	173.887	229.175	198.714	330.625	196.381	256.29
PB.888.6	ENSG00000135387	CAPRIN1	ENST00000532820	FSM	8.57072	3.60474	3.03452	1.18791	0.234867	0.382315	Not	CAPRIN1-PB.888.6-Anno	Annotated	0.00320069	17.7215	0.000209218	1.12224	0	3.10545e-08	4.10293e-06	7.56225e-07	0.0010412	0.157867	0.019569	1.0831	1.51516e-05	4.35065
PB.279.1	ENSG00000116489	CAPZA1	novel	NNC	1571.6	0.960918	0.133094	7.21983	5.20528e-13	1.17026e-11	Not	CAPZA1-PB.279.1-novel	novel	1034.24	2154.33	98.5608	198.119	127.275	89.933	95.4779	91.0564	89.0621	204.448	155.873	242.384	178.443	209.449
PB.279.2	ENSG00000116489	CAPZA1	ENST00000485542	FSM	625.712	0.253117	0.161745	1.56491	0.117604	0.225876	Not	CAPZA1-PB.279.2-Anno	Annotated	556.124	696.752	39.2576	47.7013	48.215	25.8966	47.4821	35.8072	38.887	54.0414	40.5628	38.7501	46.6452	58.5069
PB.279.3	ENSG00000116489	CAPZA1	ENST00000263168	FSM	1363.4	1.02778	0.113818	9.03005	1.71592e-19	7.52528e-18	Not	CAPZA1-PB.279.3-Anno	Annotated	871.093	1891.54	113.984	240.271	113.918	108.753	108.568	107.77	130.912	246.742	211.603	277.919	213.376	251.717
PB.4627.1	ENSG00000198898	CAPZA2	ENST00000361183	FSM	1714.72	0.419772	0.121805	3.44626	0.000568394	0.00257912	Not	CAPZA2-PB.4627.1-Anno	Annotated	1423	2043.4	135.57	188.721	120.657	119.416	149.206	142.959	145.613	155.049	183.16	250.071	165.476	189.848
PB.49.1	ENSG00000077549	CAPZB	ENST00000264202	FSM	2991.46	0.758583	0.0934994	8.11323	4.92899e-16	1.50845e-14	Not	CAPZB-PB.49.1-Anno	Annotated	2156.02	3910.18	318.914	559.929	327.029	264.783	367.765	324.497	310.499	538.429	507.32	706.079	603.318	444.499
PB.49.2	ENSG00000077549	CAPZB	novel	NNC	550.747	-0.107025	0.166735	-0.641889	0.520945	0.665748	Not	CAPZB-PB.49.2-novel	novel	555.578	541.416	82.3638	77.7792	97.9237	102.671	62.5345	64.2496	84.4406	72.3018	73.5386	77.0664	70.6004	95.3888
PB.3936.1	ENSG00000132357	CARD6	ENST00000254691	ISM	353.778	0.354781	0.226815	1.56419	0.117773	0.226114	Not	CARD6-PB.3936.1-Anno	Annotated	307.829	399.915	19.5014	24.7358	17.1246	12.9283	16.168	21.1087	30.1773	22.8968	27.4356	24.1074	24.2377	25.0017
PB.1911.1	ENSG00000153048	CARHSP1	ENST00000311052	FSM	537.933	-0.0968543	0.132604	-0.730403	0.465144	0.616906	Not	CARHSP1-PB.1911.1-Anno	Annotated	542.484	533.395	45.6553	43.6837	49.6653	33.3823	55.2733	45.9213	44.0341	50.8804	40.5539	40.9414	47.2909	38.7518
PB.2459.1	ENSG00000142453	CARM1	ENST00000344150	FSM	333.121	0.622787	0.272777	2.28314	0.0224222	0.0599796	Not	CARM1-PB.2459.1-Anno	Annotated	258.521	420.691	21.8462	33.7682	34.9694	19.3918	26.421	17.0066	11.4423	32.1079	29.002	51.1904	21.5062	35.0342
PB.2459.4	ENSG00000142453	CARM1	ENST00000344150	ISM	678.482	0.482773	0.146976	3.28471	0.00102087	0.00430863	Not	CARM1-PB.2459.4-Anno	Annotated	546.972	818.281	50.9337	74.2251	54.1024	47.6626	57.5962	45.203	50.1042	84.4694	74.082	74.9247	86.3461	51.3033
PB.5003.1	ENSG00000156017	CARNMT1	ENST00000376834	FSM	260.885	2.03817	0.894688	2.27808	0.022722	0.0606415	Not	CARNMT1-PB.5003.1-Anno	Annotated	138.138	390.82	7.37902	20.645	1.03017e-07	9.89437	13.524	3.30795	10.1687	19.0948	20.5784	18.9071	20.5299	24.1149
PB.5003.2	ENSG00000156017	CARNMT1	ENST00000376834	FSM	60.3413	-1.91315	0.997855	-1.91726	0.0552051	0.124073	Not	CARNMT1-PB.5003.2-Anno	Annotated	86.2818	34.8825	4.91881	1.80069	14.579	4.69603	0.693857	3.42596	1.19927	0.276092	0.97773	6.08507	1.37954	0.285021
PB.5003.3	ENSG00000156017	CARNMT1	ENST00000376834	FSM	168.992	0.555245	0.334177	1.66153	0.0966069	0.193353	Not	CARNMT1-PB.5003.3-Anno	Annotated	134.72	206.707	9.45163	14.2787	5.62135	9.1956	9.26473	13.7704	9.40602	15.8876	13.224	19.1535	14.3425	8.78614
PB.2171.1	ENSG00000108349	CASC3	ENST00000264645	FSM	2168.89	-0.485732	0.0951055	-5.1073	3.26803e-07	3.12284e-06	Not	CASC3-PB.2171.1-Anno	Annotated	2457.46	1861.83	132.824	98.1987	141.956	122.26	149.474	126.255	124.175	98.4614	96.1887	93.6303	120.099	82.6138
PB.2284.1	ENSG00000177303	CASKIN2	ENST00000321617	FSM	568.735	-0.640052	0.204495	-3.12992	0.00174855	0.00680895	Not	CASKIN2-PB.2284.1-Anno	Annotated	676.4	454.4	30.4528	19.7631	47.0241	22.4367	30.8462	23.2711	28.6858	21.595	21.8301	17.6808	23.788	13.9218
PB.1018.1	ENSG00000137752	CASP1	ENST00000533400	FSM	245.814	-0.73125	0.152313	-4.80098	1.57894e-06	1.32314e-05	Not	CASP1-PB.1018.1-Anno	Annotated	299.2	191	35.1154	21.6784	37.6401	24.6036	40.0532	37.217	36.0633	22.354	18.9215	26.7144	20.3132	20.0892
PB.4683.1	ENSG00000106144	CASP2	ENST00000310447	FSM	118.357	0.632213	1.0819	0.584354	0.558982	0.697924	Not	CASP2-PB.4683.1-Anno	Annotated	99.2517	139.042	7.65291	10.4469	5.85527	8.81131	18.3096	5.28841	2.39588e-09	16.7555	10.3964	5.87103	3.09284	16.1186
PB.4683.2	ENSG00000106144	CASP2	ENST00000310447	FSM	1541.96	-0.0746847	0.117305	-0.636669	0.52434	0.668733	Not	CASP2-PB.4683.2-Anno	Annotated	1540.37	1543.19	85.8757	83.461	113.001	75.6669	92.0326	70.8694	77.8086	88.6114	80.1356	80.4853	98.7042	69.3687
PB.3817.1	ENSG00000138794	CASP6	ENST00000265164	FSM	206.784	-0.152053	0.127461	-1.19294	0.232894	0.380328	Not	CASP6-PB.3817.1-Anno	Annotated	210.952	202.115	36.7806	34.2123	36.9144	31.7567	38.489	36.9376	39.8053	33.9451	28.9972	35.6405	36.5422	35.9362
PB.2931.1	ENSG00000064012	CASP8	novel	NIC	833.921	-0.228511	0.15196	-1.50376	0.132644	0.24731	Not	CASP8-PB.2931.1-novel	novel	877.902	785.459	59.3829	51.6094	73.523	43.1168	72.1918	51.2314	56.8512	59.2804	46.3241	41.8723	58.0871	52.4831
PB.4031.6	ENSG00000153113	CAST	ENST00000674984	FSM	534.956	-5.44933	1.61516	-3.37385	0.000741237	0.00324882	Down	CAST-PB.4031.6-Anno	Annotated	973.425	76.5945	48.6596	3.71247	109.913	23.4867	50.4945	25.1685	34.2351	4.56307	0.000102034	3.54712e-06	7.50844	6.49072
PB.4031.1	ENSG00000153113	CAST	ENST00000675179	FSM	272.047	-1.36505	0.37833	-3.60808	0.000308466	0.00149749	Not	CAST-PB.4031.1-Anno	Annotated	405.718	144.742	19.3144	6.53713	25.0407	10.2438	44.5271	8.35988	8.40065	4.30791	4.78104	10.0788	9.02708	4.49088
PB.4031.10	ENSG00000153113	CAST	ENST00000675179	FSM	40.1443	2.08001	2.72638	0.762921	0.445511	0.599683	Not	CAST-PB.4031.10-Anno	Annotated	8.99668	78.8627	0.674167	5.81483	0	9.63009e-09	0.0233401	3.32866	0.0188356	0	0.0038229	19.425	1.73924	7.90612
PB.4031.11	ENSG00000153113	CAST	ENST00000674984	FSM	917.643	-1.27324	1.19556	-1.06497	0.286888	0.442956	Not	CAST-PB.4031.11-Anno	Annotated	1055.08	764.251	84.5115	60.5694	23.9255	101.959	125.056	110.677	60.939	0.0334721	96.7631	38.0086	94.0788	73.9628
PB.4031.12	ENSG00000153113	CAST	ENST00000508830	ISM	221.799	1.2104	0.991651	1.22059	0.22224	0.367055	Not	CAST-PB.4031.12-Anno	Annotated	161.754	281.291	17.2377	30.098	0	13.7721	10.8679	26.1216	35.427	40.1599	38.4617	24.797	27.4639	19.6074
PB.4031.13	ENSG00000153113	CAST	ENST00000675663	FSM	416.541	1.03594	1.91269	0.541613	0.588085	0.721043	Not	CAST-PB.4031.13-Anno	Annotated	329.397	498.937	27.9775	40.7512	73.2693	31.5233	1.40933e-07	7.68563	27.4092	98.3739	1.51735e-06	26.9064	32.8247	45.651
PB.4031.14	ENSG00000153113	CAST	novel	NIC	1173.9	-0.185306	0.230943	-0.802389	0.422328	0.578339	Not	CAST-PB.4031.14-novel	novel	1189.53	1148.27	57.3275	54.1063	37.7496	48.6629	66.5429	63.1194	70.5625	32.4219	92.6358	45.8639	51.2958	48.314
PB.4031.15	ENSG00000153113	CAST	ENST00000309190	FSM	171.65	0.534946	0.607295	0.880866	0.37839	0.536684	Not	CAST-PB.4031.15-Anno	Annotated	144.934	202.282	9.90752	13.6936	1.84815	18.6917	8.67663	11.4771	8.84407	16.068	15.1145	20.9001	4.71276	11.6726
PB.4031.16	ENSG00000153113	CAST	ENST00000309190	FSM	1825.66	0.144611	0.245878	0.588139	0.556439	0.695874	Not	CAST-PB.4031.16-Anno	Annotated	1711.71	1938.43	87.243	97.776	53.7084	106.083	84.741	109.075	82.6073	108.901	71.249	102.064	106.491	100.175
PB.4031.17	ENSG00000153113	CAST	ENST00000395813	FSM	231.126	1.82784	1.82357	1.00234	0.316178	0.47477	Not	CAST-PB.4031.17-Anno	Annotated	186.027	277.713	12.9547	18.5082	17.9569	0	8.15205e-10	15.8979	30.9187	9.02604	18.297	24.5126	14.3114	26.3937
PB.4031.2	ENSG00000153113	CAST	ENST00000674984	ISM	10.6366	-0.0983275	3.04453	-0.0322964	0.974236	0.985619	Not	CAST-PB.4031.2-Anno	Annotated	14.1649	6.15063	1.69904	0.790683	0.00220836	8.49298	0	0	0	0	0	0	3.95341	4.65181e-09
PB.4031.3	ENSG00000153113	CAST	novel	NIC	113.839	-1.01322	0.322637	-3.14044	0.00168696	0.00660617	Not	CAST-PB.4031.3-novel	novel	148.661	76.6234	20.5986	10.2274	33.033	16.4493	24.5319	14.3101	14.6686	12.0988	8.80561	7.22463	14.1871	8.82088
PB.4031.4	ENSG00000153113	CAST	ENST00000674984	FSM	350.465	2.61195	1.51806	1.72058	0.0853266	0.175011	Not	CAST-PB.4031.4-Anno	Annotated	149.161	576.403	10.565	40.1913	5.05559e-06	10.4523	0.67594	0.87752	40.819	77.7597	26.1863	73.0505	1.44144	22.5186
PB.4031.5	ENSG00000153113	CAST	novel	NIC	7.59415	-1.65327	3.01119	-0.549041	0.582978	0.716804	Not	CAST-PB.4031.5-novel	novel	5.20966	9.628	0.523317	1.00531	0	0.698636	0	0	1.91795	6.87761e-06	2.16848e-07	0.00405326	5.02249	0
PB.4031.7	ENSG00000153113	CAST	ENST00000675179	FSM	21.5375	-4.28439	3.01757	-1.41981	0.155662	0.28066	Not	CAST-PB.4031.7-Anno	Annotated	40.9935	0.051897	1.8763	0.00242943	0.00858648	8.49989e-05	0.17082	7.88537	1.31665	1.19754e-09	0	2.81182e-05	0.00242482	0.00969422
PB.4031.9	ENSG00000153113	CAST	novel	NIC	928.433	-0.698404	0.0953482	-7.32477	2.39302e-13	5.61631e-12	Not	CAST-PB.4031.9-novel	novel	1117.24	736.367	71.3651	45.6124	72.1727	57.3894	84.6683	73.9251	68.6702	35.455	41.9265	56.7848	52.6214	41.2743
PB.890.1	ENSG00000121691	CAT	ENST00000241052	FSM	1254.99	-0.532608	0.103549	-5.14352	2.6964e-07	2.64575e-06	Not	CAT-PB.890.1-Anno	Annotated	1448.4	1063.2	166.64	118.196	152.774	134.32	222.976	155.793	167.336	95.5348	121.189	142.54	105.005	126.71
PB.4626.5	ENSG00000105974	CAV1	novel	NIC	21.2752	-5.82846	1.79263	-3.25135	0.00114859	0.00472703	Down	CAV1-PB.4626.5-novel	novel	35.3436	6.13932	4.30223	0.728366	9.44125	4.39911	4.39988	0.849591	2.42134	0	0	2.54024e-05	3.01526	0.626542
PB.4626.1	ENSG00000105974	CAV1	ENST00000489856	FSM	230.828	-0.0562988	0.205939	-0.273376	0.784564	0.872059	Not	CAV1-PB.4626.1-Anno	Annotated	231.708	232.81	27.1844	26.4321	21.3427	20.2525	43.964	24.6922	25.6705	17.1764	29.6581	29.8458	29.72	25.7604
PB.4626.2	ENSG00000105974	CAV1	ENST00000451122	FSM	158.071	-0.804259	0.222018	-3.6225	0.000291768	0.0014244	Not	CAV1-PB.4626.2-Anno	Annotated	194.958	120.578	30.1886	17.8865	38.7013	24.284	33.9094	28.151	25.8973	14.5124	19.0074	24.2067	17.4984	14.2074
PB.4626.3	ENSG00000105974	CAV1	ENST00000393467	FSM	6472.22	0.0751594	0.160577	0.468059	0.639742	0.763099	Not	CAV1-PB.4626.3-Anno	Annotated	6079.49	7006.44	543.644	600.943	605.519	429.319	682.301	473.007	528.073	400.443	559.222	860.237	521.23	663.584
PB.4626.4	ENSG00000105974	CAV1	novel	NIC	8.454	4.61503	2.64964	1.74176	0.0815505	0.168862	Not	CAV1-PB.4626.4-novel	novel	2.62054	14.8651	0.300512	1.62031	0	0	1.50256	0	0	1.81619	3.59412	1.41112	1.2801	1.92542e-06
PB.4626.6	ENSG00000105974	CAV1	ENST00000393467	FSM	989.534	-0.625632	0.148514	-4.21262	2.52425e-05	0.000161622	Not	CAV1-PB.4626.6-Anno	Annotated	1167.08	812.772	298.76	199.561	337.508	216.641	419.724	260.459	259.471	173.083	179.196	253.693	253.209	138.621
PB.4624.2	ENSG00000105971	CAV2	ENST00000222693	FSM	604.258	0.686404	0.167204	4.10519	4.03988e-05	0.000246401	Not	CAV2-PB.4624.2-Anno	Annotated	456.435	775.929	50.513	81.8848	58.626	29.9529	76.7262	35.1199	52.14	59.2097	63.9407	117.066	71.6321	97.5756
PB.4624.3	ENSG00000105971	CAV2	ENST00000222693	FSM	1360.75	-0.0601508	0.0754333	-0.797405	0.425216	0.581377	Not	CAV2-PB.4624.3-Anno	Annotated	1349.22	1368.14	103.523	101.941	119.415	101.106	103.07	84.2991	109.726	106.47	112.452	96.7678	97.1245	96.8906
PB.2185.1	ENSG00000177469	CAVIN1	ENST00000357037	FSM	8905.96	-0.410081	0.148561	-2.76036	0.00577374	0.0190276	Not	PTRF-PB.2185.1-Anno	Annotated	9822.29	7962.15	615.414	484.077	681.763	568.027	626.173	574.949	626.157	447.783	559.059	558.683	514.057	340.805
PB.2185.4	ENSG00000177469	CAVIN1	ENST00000357037	FSM	1789.39	-1.9725	0.403672	-4.88638	1.02705e-06	8.9298e-06	Not	PTRF-PB.2185.4-Anno	Annotated	2659.07	846.415	261.007	80.8844	502.927	133.141	227.227	183.892	257.849	105.89	51.9024	20.6908	179.728	46.2103
PB.2916.1	ENSG00000168497	CAVIN2	ENST00000304141	FSM	663.842	-0.501372	0.292211	-1.71579	0.0862013	0.176597	Not	SDPR-PB.2916.1-Anno	Annotated	753.6	571.8	84.6465	61.4277	104.143	50.4995	108.025	59.9442	100.621	42.1114	93.1252	60.7685	51.7618	59.3716
PB.2008.1	ENSG00000067955	CBFB	ENST00000290858	FSM	209.653	1.0895	0.354677	3.0718	0.00212771	0.00810817	Not	CBFB-PB.2008.1-Anno	Annotated	135.27	288.442	9.73682	20.1725	10.2414	8.70834	14.8608	10.8039	4.06964	19.1497	18.2467	18.9061	19.7728	24.7869
PB.2008.2	ENSG00000067955	CBFB	ENST00000412916	FSM	681.676	0.910814	0.125834	7.2382	4.54682e-13	1.03904e-11	Not	CBFB-PB.2008.2-Anno	Annotated	461.962	916.776	34.1654	65.9606	35.3789	32.4493	37.3415	37.9363	27.7209	65.7076	63.609	73.4136	61.3273	65.7458
PB.2008.3	ENSG00000067955	CBFB	ENST00000290858	FSM	651.463	0.743689	0.240037	3.09823	0.0019468	0.00748032	Not	CBFB-PB.2008.3-Anno	Annotated	473.168	851.182	36.3303	62.6573	54.5733	31.5346	27.3929	34.3325	33.8181	56.5584	50.0754	92.1919	56.673	57.788
PB.3471.1	ENSG00000114423	CBLB	ENST00000394030	FSM	2045.07	0.62021	0.153079	4.05157	5.08757e-05	0.000302597	Not	CBLB-PB.3471.1-Anno	Annotated	1587	2554.27	90.7353	141.626	77.7041	66.8401	102.674	81.1696	125.288	125.928	132.68	184.791	132.031	132.699
PB.3471.2	ENSG00000114423	CBLB	novel	NIC	714.76	0.310779	0.313427	0.991551	0.321416	0.479617	Not	CBLB-PB.3471.2-novel	novel	607.826	846.456	36.2041	48.1089	53.8203	25.2655	29.7923	42.3081	29.8344	42.2728	31.2769	82.8325	29.8265	54.3359
PB.4611.1	ENSG00000105879	CBLL1	ENST00000440859	FSM	781.503	-0.262094	0.0866362	-3.02523	0.00248447	0.00925943	Not	CBLL1-PB.4611.1-Anno	Annotated	830.4	737	46.3564	39.922	49.2357	46.9035	54.3986	39.5974	41.647	40.7112	36.7826	49.3206	39.6327	33.1629
PB.3882.1	ENSG00000145439	CBR4	ENST00000306193	FSM	465.038	0.0605171	0.174432	0.346938	0.728638	0.838015	Not	CBR4-PB.3882.1-Anno	Annotated	444.2	487.2	28.9649	30.899	31.2085	28.0824	36.8602	20.2787	28.3945	36.144	34.6578	28.0624	31.2982	24.3325
PB.4992.1	ENSG00000196873	CBWD3	novel	NIC	415.048	-0.297534	0.212241	-1.40187	0.160954	0.287811	Not	CBWD3-PB.4992.1-novel	novel	437.493	384.858	37.8043	32.4261	52.6917	35.443	37.1324	28.6949	35.0597	44.6416	32.6808	17.284	36.9349	30.589
PB.4990.1	ENSG00000147996	CBWD5	ENST00000476161	FSM	814.046	0.182867	0.0932453	1.96114	0.0498632	0.114323	Not	CBWD5-PB.4990.1-Anno	Annotated	741.907	888.742	85.2256	99.3969	83.605	93.7079	90.8706	70.8258	87.1189	103.423	97.9268	97.3383	94.746	103.55
PB.3246.1	ENSG00000183741	CBX6	ENST00000407418	FSM	866.353	-0.360217	0.239961	-1.50115	0.133318	0.2483	Not	CBX6-PB.3246.1-Anno	Annotated	954.711	778.999	65.3366	51.6161	64.2634	36.7664	83.9769	76.7362	64.9399	42.6987	65.2043	57.6971	49.5019	42.9783
PB.3246.2	ENSG00000183741	CBX6	ENST00000407418	ISM	537.875	-2.31878	1.23076	-1.88402	0.0595622	0.131792	Not	CBX6-PB.3246.2-Anno	Annotated	773.185	289.513	59.3553	21.4226	129.856	59.6265	68.5649	17.4882	21.2405	22.8322	24.7041	10.1731	49.4012	0.0024557
PB.2472.1	ENSG00000132024	CC2D1A	novel	NIC	373.873	-0.136344	0.212816	-0.640667	0.521739	0.666316	Not	CC2D1A-PB.2472.1-novel	novel	374	368.2	23.6	22.7337	29.0275	26.1706	23.6783	17.483	21.6408	28.1973	28.4827	13.7233	26.5261	16.7391
PB.3685.1	ENSG00000048342	CC2D2A	ENST00000506643	ISM	515.813	-0.472328	0.132636	-3.56108	0.000369335	0.00174899	Not	CC2D2A-PB.3685.1-Anno	Annotated	585.6	444.6	28.8892	21.2673	30.5239	22.8594	36.5368	26.299	28.2268	18.9162	23.0568	22.0348	21.2603	21.0685
PB.4740.1	ENSG00000158941	CCAR2	ENST00000308511	FSM	996.894	0.247751	0.154779	1.60067	0.109449	0.212981	Not	CCAR2-PB.4740.1-Anno	Annotated	892.838	1112.46	54.4039	65.8249	66.8653	58.6969	67.0524	36.0566	43.3484	85.382	57.1134	68.6094	68.1379	49.8821
PB.2391.1	ENSG00000183287	CCBE1	ENST00000439986	FSM	231.693	-1.30707	0.427657	-3.05635	0.00224046	0.00845895	Not	CCBE1-PB.2391.1-Anno	Annotated	326.535	131.53	20.0984	8.02719	11.7749	4.79914	25.2011	33.1443	25.5724	6.69608	4.86373	8.01416	17.4283	3.1337
PB.2391.2	ENSG00000183287	CCBE1	ENST00000649564	FSM	46.4405	-2.85651	1.76581	-1.61768	0.105732	0.207316	Not	CCBE1-PB.2391.2-Anno	Annotated	73.4011	19.3168	4.66982	1.17504	3.40415	0	5.54781	9.9659	4.43126	2.13354	0	3.74168	0	0
PB.2391.3	ENSG00000183287	CCBE1	ENST00000439986	FSM	327.025	-0.296102	0.271509	-1.09058	0.275458	0.430225	Not	CCBE1-PB.2391.3-Anno	Annotated	352.627	295.167	23.9891	19.66	28.7944	24.4336	17.1724	34.0337	15.5112	18.9421	19.5401	15.1212	18.5803	26.1161
PB.2391.5	ENSG00000183287	CCBE1	ENST00000439986	FSM	12.5151	-0.642643	3.01375	-0.213237	0.831142	0.898323	Not	CCBE1-PB.2391.5-Anno	Annotated	14.2191	10.0567	1.32415	0.979929	3.72196e-09	6.3389	0	0	0.281853	2.9823	1.91734	3.17136e-06	3.83611e-09	0
PB.2391.6	ENSG00000183287	CCBE1	ENST00000439986	FSM	142.507	0.503982	0.31247	1.6129	0.106767	0.208873	Not	CCBE1-PB.2391.6-Anno	Annotated	119.966	169.824	13.4749	18.4456	11.5426	5.33986	22.9062	19.5895	7.99622	10.8473	10.9361	25.0717	23.7162	21.6569
PB.4052.1	ENSG00000164221	CCDC112	ENST00000506442	ISM	114.007	0.566654	0.217269	2.60807	0.00910545	0.0280637	Not	CCDC112-PB.4052.1-Anno	Annotated	89.6	140.2	17.2879	26.1605	17.854	13.6484	21.2689	19.0579	14.6105	22.781	26.0333	26.9664	27.8803	27.1417
PB.3210.1	ENSG00000159873	CCDC117	ENST00000249064	FSM	1097.75	0.268523	0.0779402	3.44524	0.000570557	0.00258725	Not	CCDC117-PB.3210.1-Anno	Annotated	969.718	1240.48	54.9101	68.0993	62.6265	48.3323	61.3198	52.1865	50.0855	69.5316	58.7541	78.6395	64.5568	69.0143
PB.2305.1	ENSG00000185298	CCDC137	ENST00000329214	FSM	218.893	0.530768	0.194137	2.73398	0.00625734	0.0203605	Not	CCDC137-PB.2305.1-Anno	Annotated	175.571	265.542	26.2648	38.61	25.7819	33.9487	27.932	18.3738	25.2875	41.7235	36.5382	43.5748	37.3075	33.906
PB.3510.1	ENSG00000175455	CCDC14	ENST00000409697	FSM	983.592	0.294397	0.0861478	3.41735	0.000632348	0.00282964	Not	CCDC14-PB.3510.1-Anno	Annotated	862.4	1115	49.8925	62.7437	50.557	42.4333	60.5929	49.6129	46.2665	60.5373	63.3875	65.8699	65.1322	58.7915
PB.1065.1	ENSG00000149548	CCDC15	novel	NIC	141.358	-0.166727	0.306121	-0.544644	0.585999	0.719373	Not	CCDC15-PB.1065.1-novel	novel	147.2	135.6	13.8654	12.3067	18.2324	11.0147	20.8929	9.07694	10.1101	14.9502	16.3049	9.44738	10.7687	10.0621
PB.3941.1	ENSG00000198865	CCDC152	ENST00000361970	FSM	353.593	-0.550524	0.191659	-2.87241	0.00407352	0.0141141	Not	CCDC152-PB.3941.1-Anno	Annotated	409.968	293.558	31.1323	21.5326	41.7624	22.0604	34.5839	29.4046	27.8501	21.313	23.5701	18.7646	20.5304	23.4847
PB.235.1	ENSG00000223745	CCDC18-AS1	ENST00000655606	FSM	115.127	-0.863222	0.302435	-2.85424	0.00431404	0.0148071	Not	CCDC18-AS1-PB.235.1-Anno	Annotated	142	84.6	23.4951	13.5339	36.8239	20.6664	19.8371	15.7026	24.4456	19.1622	15.0876	6.29756	15.3695	11.7528
PB.4759.1	ENSG00000147419	CCDC25	ENST00000356537	FSM	364.026	0.865221	0.543269	1.59262	0.111245	0.215571	Not	CCDC25-PB.4759.1-Anno	Annotated	295.876	439.111	17.8957	26.2438	1.67919	21.8111	30.4305	11.2149	24.3429	23.236	19.5161	28.5456	31.4856	28.4354
PB.4759.2	ENSG00000147419	CCDC25	ENST00000520486	FSM	133.909	-0.51821	0.211486	-2.45033	0.0142725	0.0412958	Not	CCDC25-PB.4759.2-Anno	Annotated	156.665	111.735	9.94074	6.7954	16.4386	8.29008	13.0667	5.93287	5.97542	9.3874	6.93235	7.277	6.01215	4.36809
PB.4759.3	ENSG00000147419	CCDC25	ENST00000356537	FSM	108.839	0.640896	1.08308	0.591735	0.554028	0.694854	Not	CCDC25-PB.4759.3-Anno	Annotated	103.259	115.154	6.58736	6.88005	18.7718	0.168187	2.68824	11.3079	0.000660732	9.35514	12.895	8.54704	3.60192	0.00119432
PB.1741.1	ENSG00000128891	CCDC32	novel	NIC	272.104	-0.232805	0.121963	-1.90883	0.0562846	0.126173	Not	C15orf57-PB.1741.1-novel	novel	285.565	258.021	47.1803	41.3097	51.8111	35.9467	53.8242	47.1783	47.1414	47.2744	33.0126	41.0945	42.0974	43.0695
PB.2199.1	ENSG00000180329	CCDC43	ENST00000315286	FSM	243.585	0.964548	0.166634	5.78841	7.10555e-09	9.45637e-08	Not	CCDC43-PB.2199.1-Anno	Annotated	161	333	17.7563	35.5552	16.9154	14.4056	19.1393	15.1307	23.1904	36.856	33.8602	42.4157	27.6378	37.0062
PB.2258.1	ENSG00000108588	CCDC47	ENST00000225726	FSM	1356.79	0.342924	0.173663	1.97465	0.0483075	0.111492	Not	CCDC47-PB.2258.1-Anno	Annotated	1171.59	1557.5	79.4657	103.292	63.0098	106.492	74.606	76.0087	77.2123	94.3215	98.8921	126.172	86.1521	110.921
PB.2258.2	ENSG00000108588	CCDC47	ENST00000225726	FSM	1324.7	-0.30214	0.186555	-1.61957	0.105324	0.20675	Not	CCDC47-PB.2258.2-Anno	Annotated	1420.01	1226.7	104.401	87.8033	111.523	118.822	83.3876	106.482	101.793	88.7303	73.8293	113.385	85.1637	77.9089
PB.3641.1	ENSG00000152492	CCDC50	ENST00000392456	FSM	1939.55	-0.0566689	0.106923	-0.529996	0.596115	0.727665	Not	CCDC50-PB.3641.1-Anno	Annotated	1938.22	1956.8	84.6963	82.8419	85.2002	61.3446	107.701	76.1862	93.0494	72.8732	80.757	94.6792	82.055	83.8452
PB.3641.3	ENSG00000152492	CCDC50	ENST00000392456	FSM	906.669	0.44502	0.14609	3.04621	0.00231744	0.00871172	Not	CCDC50-PB.3641.3-Anno	Annotated	747.108	1079.5	54.3428	76.2706	57.754	47.4863	54.189	61.8641	50.4206	77.6068	76.1317	88.3243	64.2347	75.0557
PB.650.1	ENSG00000108091	CCDC6	ENST00000263102	FSM	863.306	-0.882019	0.219861	-4.01172	6.02782e-05	0.000351008	Not	CCDC6-PB.650.1-Anno	Annotated	1110.65	589.778	43.1497	22.1837	81.4308	54.8468	20.2109	23.1807	36.0793	33.9135	25.936	17.9376	19.5361	13.5954
PB.650.2	ENSG00000108091	CCDC6	ENST00000263102	FSM	1812.64	0.731954	0.338078	2.16505	0.0303841	0.0769235	Not	CCDC6-PB.650.2-Anno	Annotated	1422.37	2237.81	56.2305	87.4896	16.1798	71.6661	62.8096	75.437	55.0599	76.9251	75.0926	111.898	77.1947	96.3377
PB.650.3	ENSG00000108091	CCDC6	ENST00000263102	FSM	867.518	-0.427149	0.122659	-3.48241	0.000496931	0.0022847	Not	CCDC6-PB.650.3-Anno	Annotated	967.183	754.411	70.6549	53.9586	77.0515	88.7369	59.1422	67.7154	60.6284	66.1993	56.235	49.2612	49.7994	48.2981
PB.2565.1	ENSG00000169515	CCDC8	ENST00000697726	FSM	155.806	-0.440872	0.401227	-1.09881	0.271851	0.426178	Not	CCDC8-PB.2565.1-Anno	Annotated	172.723	139.691	12.3144	9.61985	14.4859	10.9697	19.2699	7.76096	9.08575	5.16105	6.1453	10.1916	15.5671	11.0342
PB.2565.2	ENSG00000169515	CCDC8	ENST00000697726	FSM	284.821	0.438865	2.01184	0.218141	0.827319	0.89641	Not	CCDC8-PB.2565.2-Anno	Annotated	292.479	272.641	23.7292	22.158	0.0142863	6.1793e-05	40.5879	28.6263	49.4173	51.7608	25.5894	5.60556	12.7435	15.0907
PB.2565.3	ENSG00000169515	CCDC8	ENST00000697726	FSM	387.31	-0.570924	0.559537	-1.02035	0.307563	0.465803	Not	CCDC8-PB.2565.3-Anno	Annotated	461.027	311.251	39.5724	25.3757	78.7328	43.3642	38.8402	21.16	15.7646	6.62635	23.2747	28.4638	40.8878	27.6258
PB.3479.1	ENSG00000091986	CCDC80	ENST00000206423	FSM	8104.93	-0.959272	0.112072	-8.55942	1.13441e-17	4.12604e-16	Not	CCDC80-PB.3479.1-Anno	Annotated	10439.2	5790.63	762.833	409.207	626.913	634.621	1072.35	748.724	731.557	336.893	385.709	622.334	393.163	307.933
PB.3479.2	ENSG00000091986	CCDC80	ENST00000206423	FSM	17597.6	-0.801423	0.194574	-4.11886	3.80754e-05	0.00023346	Not	CCDC80-PB.3479.2-Anno	Annotated	21930	13077.2	1260.43	734.882	799.15	1121.79	1336.74	1541.85	1502.6	620.004	752.921	965.775	686.338	649.37
PB.3479.4	ENSG00000091986	CCDC80	ENST00000206423	ISM	103.126	-0.957059	3.09947	-0.308781	0.757488	0.860201	Not	CCDC80-PB.3479.4-Anno	Annotated	200.259	0	20.3226	0	101.613	0	0	0	0	0	0	0	0	0
PB.3479.7	ENSG00000091986	CCDC80	novel	NIC	468.41	-1.66174	0.353241	-4.70427	2.54779e-06	2.06528e-05	Not	CCDC80-PB.3479.7-novel	novel	667.878	250.728	82.0429	29.9956	111.835	70.9718	67.3255	71.5366	88.545	23.4598	40.6504	19.4435	54.4138	12.0105
PB.3479.8	ENSG00000091986	CCDC80	ENST00000439685	ISM	899.842	-1.36179	0.198094	-6.87445	6.22283e-12	1.23868e-10	Not	CCDC80-PB.3479.8-Anno	Annotated	1261.61	539.168	158.508	65.2852	111.283	127.556	241.954	138.06	173.689	50.5378	61.2992	114.092	62.1134	38.3833
PB.3479.9	ENSG00000091986	CCDC80	novel	NIC	70.005	-2.3706	3.04255	-0.779146	0.435893	0.591783	Not	CCDC80-PB.3479.9-novel	novel	141.422	2.35191e-06	19.867	3.1624e-07	46.6778	0	52.6565	0	0.000724889	1.5812e-06	0	0	0	0
PB.1013.1	ENSG00000149231	CCDC82	ENST00000646818	FSM	937.299	0.41505	0.136771	3.03464	0.00240819	0.00900901	Not	CCDC82-PB.1013.1-Anno	Annotated	778.2	1112.8	65.6701	91.0256	69.6465	54.7291	68.0009	65.1373	70.8368	103.157	79.1954	110.728	71.2643	90.7833
PB.2712.1	ENSG00000115355	CCDC88A	ENST00000644630	ISM	788.525	0.420973	0.139044	3.02763	0.00246478	0.00920581	Not	CCDC88A-PB.2712.1-Anno	Annotated	657.8	931.8	56.8368	78.501	47.4669	52.2271	65.6666	62.031	56.7923	78.8863	66.2128	91.623	70.9794	84.8035
PB.1000.1	ENSG00000137500	CCDC90B	novel	NIC	217.802	0.122245	0.163136	0.749345	0.453649	0.607226	Not	CCDC90B-PB.1000.1-novel	novel	203.652	233.808	23.1557	25.7515	24.7946	19.5174	29.8859	22.8132	18.7675	24.1382	22.6825	27.3274	26.9235	27.6857
PB.1000.2	ENSG00000137500	CCDC90B	ENST00000526631	FSM	111.925	-0.0397231	0.404482	-0.0982073	0.921768	0.953404	Not	CCDC90B-PB.1000.2-Anno	Annotated	111.661	113.086	14.4442	14.0302	19.5012	6.20922	15.6952	16.9861	13.8293	16.657	16.4613	15.4217	8.60592	13.0051
PB.2547.1	ENSG00000142039	CCDC97	ENST00000269967	FSM	1123.72	-1.0444	0.182339	-5.72779	1.01748e-08	1.31384e-07	Not	CCDC97-PB.2547.1-Anno	Annotated	1464.4	762.6	98.982	50.0432	138.73	82.4712	108.062	82.6649	82.9817	54.5915	50.7627	43.189	70.0446	31.6283
PB.4219.1	ENSG00000204536	CCHCR1	ENST00000376266	FSM	150.327	0.244833	0.252043	0.971393	0.331352	0.489455	Not	CCHCR1-PB.4219.1-Anno	Annotated	136.4	166.4	12.1583	14.3745	13.6309	11.0647	18.8775	8.30032	8.91807	17.735	11.8679	14.3246	15.6359	12.3093
PB.3831.1	ENSG00000145386	CCNA2	ENST00000274026	FSM	509.215	3.38142	0.170866	19.7898	3.64308e-87	5.0617e-84	Up	CCNA2-PB.3831.1-Anno	Annotated	86	969.8	6.80596	74.2448	6.86996	6.89858	8.39987	6.15166	5.70973	75.4045	55.7557	103.437	59.9716	76.6556
PB.978.2	ENSG00000110092	CCND1	ENST00000227507	FSM	669.648	-2.46495	0.376618	-6.54495	5.95133e-11	1.03619e-09	Down	CCND1-PB.978.2-Anno	Annotated	1073.57	245.297	57.2665	12.4343	111.966	72.0971	64.4734	16.3976	21.3985	10.4182	36.3886	6.2703	6.20912	2.88496
PB.978.1	ENSG00000110092	CCND1	ENST00000227507	FSM	597.305	-0.736618	0.36586	-2.01339	0.0440737	0.103684	Not	CCND1-PB.978.1-Anno	Annotated	710.55	478.034	37.0039	24.0741	56.4117	40.2669	28.844	26.8511	32.6457	14.3684	13.6114	29.3505	41.392	21.648
PB.978.3	ENSG00000110092	CCND1	ENST00000227507	FSM	713.086	1.22193	0.789119	1.54847	0.121509	0.231315	Not	CCND1-PB.978.3-Anno	Annotated	501.554	924.777	30.2113	54.0656	54.8545	21.9079	1.22698	45.2675	27.7996	41.0694	51.3017	51.5323	79.0639	47.3609
PB.978.7	ENSG00000110092	CCND1	ENST00000227507	ISM	471.075	0.106906	0.449615	0.237772	0.812058	0.885337	Not	CCND1-PB.978.7-Anno	Annotated	405.193	524.084	27.885	35.6042	30.2538	51.7314	22.3793	20.1229	14.9376	13.0654	51.3234	10.2317	56.7258	46.6745
PB.978.8	ENSG00000110092	CCND1	ENST00000227507	ISM	10.5164	2.13025	1.89415	1.12465	0.260738	0.413738	Not	CCND1-PB.978.8-Anno	Annotated	2.53081	18.5872	0.176612	1.30839	0	0.00475454	0.116365	0.76194	3.10405e-09	0.0645268	0.0907653	0.416423	0.228117	5.74211
PB.978.9	ENSG00000110092	CCND1	ENST00000227507	ISM	414.53	3.26256	1.3862	2.35359	0.0185929	0.051501	Not	CCND1-PB.978.9-Anno	Annotated	194.716	657.147	14.5016	48.2645	0	0.275649	12.6688	16.878	42.6856	67.5387	20.3492	72.8604	38.4852	42.0889
PB.1097.1	ENSG00000118971	CCND2	ENST00000261254	FSM	4179.44	-1.21828	0.142776	-8.53277	1.42879e-17	5.09017e-16	Not	CCND2-PB.1097.1-Anno	Annotated	5681	2582.2	191.407	84.364	242.28	170.167	163.58	192.435	188.57	79.227	92.4719	93.8421	82.3358	73.9433
PB.4850.1	ENSG00000175305	CCNE2	ENST00000308108	FSM	267.422	-0.296729	0.228596	-1.29805	0.19427	0.331595	Not	CCNE2-PB.4850.1-Anno	Annotated	294.8	241	25.3706	20.0897	26.9573	30.9317	37.7	13.4808	17.7832	23.2829	20.1994	20.4527	16.9719	19.5414
PB.1895.1	ENSG00000162063	CCNF	ENST00000397066	FSM	165.232	1.92449	0.258016	7.4588	8.73118e-14	2.17403e-12	Not	CCNF-PB.1895.1-Anno	Annotated	68.4	269	4.89318	18.5701	6.85316	5.78289	5.21314	2.75889	3.85782	21.8962	14.2218	21.1948	16.8701	18.6678
PB.3762.1	ENSG00000138764	CCNG2	ENST00000316355	ISM	2442.38	-1.04394	0.100434	-10.3942	2.63398e-25	1.88642e-23	Not	CCNG2-PB.3762.1-Anno	Annotated	3204.04	1630.62	181.053	90.0757	164.098	151.677	194.333	205.812	189.345	85.0678	91.7971	88.1428	95.868	89.5026
PB.3758.1	ENSG00000118816	CCNI	ENST00000237654	FSM	6611.3	-0.765351	0.0867919	-8.81823	1.16285e-18	4.69671e-17	Not	CCNI-PB.3758.1-Anno	Annotated	8092.53	5057.9	1005.03	607.605	1206.29	824.101	1085.66	991.187	917.907	599.065	589.196	669.411	673.61	506.745
PB.3758.3	ENSG00000118816	CCNI	ENST00000237654	FSM	24.9698	-0.956118	3.09979	-0.308446	0.757743	0.860201	Not	CCNI-PB.3758.3-Anno	Annotated	48.1503	0	6.88537	0	34.4249	1.13921e-07	0.00195546	3.31943e-09	0	0	0	0	0	0
PB.725.1	ENSG00000107443	CCNJ	ENST00000465148	FSM	294.43	0.318924	0.164483	1.93895	0.0525075	0.119245	Not	CCNJ-PB.725.1-Anno	Annotated	254	341	14.1653	18.4413	14.5424	15.0744	15.9937	11.8082	13.4078	20.5884	15.1561	24.285	14.3487	17.8284
PB.1690.1	ENSG00000090061	CCNK	novel	NIC	183.767	-0.23272	0.183194	-1.27035	0.20396	0.344161	Not	CCNK-PB.1690.1-novel	novel	194.332	173.376	22.8219	19.561	31.6996	15.6203	25.6449	20.488	20.6565	21.383	18.4428	20.498	16.8793	20.6019
PB.1168.1	ENSG00000129315	CCNT1	ENST00000261900	FSM	788.226	-0.334422	0.184151	-1.81602	0.0693678	0.148322	Not	CCNT1-PB.1168.1-Anno	Annotated	857.6	716.2	86.4891	70.3589	83.5758	114.278	77.198	85.8172	71.5761	65.4136	65.8694	88.2623	61.9203	70.329
PB.2827.1	ENSG00000082258	CCNT2	ENST00000264157	FSM	524.37	-0.16518	0.131569	-1.25546	0.209313	0.351316	Not	CCNT2-PB.2827.1-Anno	Annotated	539.6	508.6	79.9256	73.4268	68.2037	78.254	85.7484	80.5318	86.8903	77.2242	68.0273	78.848	68.4764	74.5579
PB.692.1	ENSG00000107771	CCSER2	ENST00000372088	ISM	984.493	-0.134768	0.119611	-1.12672	0.259862	0.412821	Not	CCSER2-PB.692.1-Anno	Annotated	999	972	93.4353	88.1608	101.892	87.381	91.2156	97.5804	89.1079	76.3196	78.5848	104.008	87.0227	94.8694
PB.358.1	ENSG00000163468	CCT3	novel	NIC	543.328	0.20064	0.107578	1.86507	0.0621713	0.136172	Not	CCT3-PB.358.1-novel	novel	493.972	598.682	57.9192	67.6372	76.1693	56.2912	63.8497	41.6284	51.6572	74.1948	61.9704	75.7135	64.6083	61.6989
PB.3900.1	ENSG00000150753	CCT5	novel	NIC	160.328	-0.0956735	0.181928	-0.525886	0.598967	0.729451	Not	CCT5-PB.3900.1-novel	novel	160.428	159.428	15.5077	15.0792	15.5509	15.3637	15.1142	14.9568	16.5528	18.3302	13.864	13.4513	15.9729	13.7777
PB.3900.2	ENSG00000150753	CCT5	ENST00000280326	FSM	1908.83	1.30965	0.20249	6.46774	9.9478e-11	1.69797e-09	Not	CCT5-PB.3900.2-Anno	Annotated	1057.71	2851.46	72.4979	189.794	64.8903	86.7936	75.7461	68.7055	66.3539	180.486	144.176	279.885	147.202	197.221
PB.4285.1	ENSG00000156535	CD109	ENST00000287097	FSM	592.245	2.43615	0.981749	2.48144	0.0130852	0.038388	Up	CD109-PB.4285.1-Anno	Annotated	388.182	840.672	17.9792	37.8779	0.483965	4.36175	38.0568	44.6907	2.30303	20.1853	23.1497	74.6121	15.3346	56.1076
PB.4285.2	ENSG00000156535	CD109	ENST00000287097	FSM	491.926	0.883907	0.572656	1.54352	0.122704	0.233222	Not	CD109-PB.4285.2-Anno	Annotated	426.513	582.35	16.3303	21.1856	28.4946	25.2231	18.4686	9.07353	0.391694	14.9766	19.1918	41.5647	24.0995	6.09542
PB.4285.3	ENSG00000156535	CD109	ENST00000287097	FSM	2627.71	-0.335148	0.151506	-2.21211	0.0269588	0.0698816	Not	CD109-PB.4285.3-Anno	Annotated	2844.08	2394.24	94.5683	77.3744	109.278	76.7738	94.7027	106.194	85.8927	58.1036	78.4171	77.8669	84.6722	87.8124
PB.4285.4	ENSG00000156535	CD109	novel	NIC	109.577	0.574769	0.243882	2.35675	0.0184355	0.0512351	Not	CD109-PB.4285.4-novel	novel	85.5092	134.884	10.2366	15.6662	9.87548	7.9189	12.0061	11.2865	10.096	13.7068	18.0709	15.7059	14.4835	16.364
PB.4285.5	ENSG00000156535	CD109	ENST00000287097	FSM	0.100212	0.471018	3.15762	0.149169	0.88142	0.928221	Not	CD109-PB.4285.5-Anno	Annotated	0.113471	0.263484	0.00422599	0.0101298	1.05651e-05	0.00278524	0.0106912	0.00656019	0.00108278	0.0347865	0.000151249	0.000152121	0.0145158	0.00104326
PB.4285.6	ENSG00000156535	CD109	ENST00000287097	FSM	695.151	0.505899	0.402693	1.25629	0.209011	0.350979	Not	CD109-PB.4285.6-Anno	Annotated	615.454	762.941	30.6333	37.0107	43.6961	35.2498	6.13229	17.9222	50.1663	30.0176	38.4231	29.1006	48.7159	38.7965
PB.4336.1	ENSG00000135535	CD164	ENST00000324953	FSM	802.637	1.18327	0.188798	6.26736	3.67226e-10	5.77176e-09	Not	CD164-PB.4336.1-Anno	Annotated	481.532	1145.35	36.5068	84.9547	26.2651	45.1121	37.8691	30.3493	42.9384	87.1508	72.1274	95.9655	66.9705	102.559
PB.4336.2	ENSG00000135535	CD164	ENST00000310786	FSM	4014.77	-0.59173	0.175982	-3.36244	0.000772568	0.00337337	Not	CD164-PB.4336.2-Anno	Annotated	4655.86	3309.82	345.644	240.75	378.347	299.443	388.133	372.206	290.09	347.105	232.064	175.298	235.232	214.052
PB.4336.3	ENSG00000135535	CD164	ENST00000310786	FSM	1849.46	0.985526	0.339708	2.9011	0.00371859	0.0131026	Not	CD164-PB.4336.3-Anno	Annotated	1195.61	2572.24	89.3128	185.117	114.237	137.898	54.1344	55.269	85.0261	107.425	240.289	282.603	186.201	109.071
PB.1836.1	ENSG00000103855	CD276	ENST00000318443	FSM	322.599	0.321195	0.403273	0.796469	0.425759	0.581891	Not	CD276-PB.1836.1-Anno	Annotated	277.299	370.861	18.1952	23.381	29.7223	20.7744	11.1518	11.7165	17.6112	12.5908	27.665	28.5964	33.4241	14.6285
PB.1836.2	ENSG00000103855	CD276	ENST00000318443	FSM	2790.73	0.340867	0.14037	2.42835	0.0151676	0.0433679	Not	CD276-PB.1836.2-Anno	Annotated	2395.25	3207.53	163.069	212.408	176.145	148.682	150.517	195.514	144.488	182.025	237.574	231.175	206.724	204.542
PB.1836.3	ENSG00000103855	CD276	novel	NIC	8.64246	1.88386	2.95727	0.637028	0.524107	0.668733	Not	CD276-PB.1836.3-novel	novel	6.20714	11.5904	0.431617	0.789411	0	0	0.777763	1.38032	0	0.819421	1.6813	1.44634	0	0
PB.1836.4	ENSG00000103855	CD276	novel	NIC	246.805	-1.08499	0.371918	-2.91728	0.00353101	0.0125408	Not	CD276-PB.1836.4-novel	novel	316.84	170.215	20.4018	10.6684	36.9229	21.5199	21.9185	11.7529	9.89465	18.2391	13.723	3.8483	13.6092	3.92251
PB.1963.1	ENSG00000169217	CD2BP2	ENST00000305596	FSM	556.958	0.0155382	0.131392	0.118259	0.905863	0.943058	Not	CD2BP2-PB.1963.1-Anno	Annotated	542.6	574	36.4306	37.5345	39.0814	45.2973	39.8503	30.4774	27.4467	41.7021	36.1732	41.4987	35.5199	32.7787
PB.2857.1	ENSG00000241399	CD302	ENST00000259053	FSM	1004.28	-0.893312	0.276521	-3.23053	0.00123559	0.00504328	Not	CD302-PB.2857.1-Anno	Annotated	1283.64	701.378	72.22	38.7793	68.1837	35.7159	85.516	113.653	58.0309	32.7891	45.0686	25.1879	54.1146	36.7366
PB.2857.2	ENSG00000241399	CD302	ENST00000259053	FSM	1512.3	-1.11531	0.113431	-9.83252	8.15481e-23	4.64356e-21	Not	CD302-PB.2857.2-Anno	Annotated	2018.48	982.832	120.507	57.0347	112.847	90.0284	130.096	125.408	144.153	52.6614	49.9748	69.6786	58.1163	54.7424
PB.895.1	ENSG00000026508	CD44	ENST00000434472	FSM	6881.74	0.210633	0.222933	0.944823	0.344749	0.503251	Not	CD44-PB.895.1-Anno	Annotated	6380.6	7308.36	311.029	351.984	309.209	491.061	162.309	337.289	255.275	403.502	370.865	329.196	382.535	273.822
PB.895.2	ENSG00000026508	CD44	ENST00000263398	FSM	20777.2	-0.603001	0.17291	-3.48738	0.000487776	0.00224707	Not	CD44-PB.895.2-Anno	Annotated	24492.9	16843.6	1266.52	846.525	1516.95	1057.69	1094.44	1687.05	976.457	720.494	852.425	1003.21	925.517	730.977
PB.895.5	ENSG00000026508	CD44	ENST00000263398	ISM	244.054	0.439164	0.269889	1.62721	0.103694	0.204183	Not	CD44-PB.895.5-Anno	Annotated	201.706	286.814	17.6337	24.3436	23.157	17.1535	12.2215	21.7714	13.8651	17.9007	22.8712	23.7867	26.0514	31.108
PB.473.1	ENSG00000117335	CD46	ENST00000322875	FSM	1072.35	-0.0576363	0.207418	-0.277875	0.781108	0.870586	Not	CD46-PB.473.1-Anno	Annotated	1030.3	1097.31	70.7984	74.1435	78.721	64.2967	66.0892	64.7471	80.1379	122.283	73.0376	41.1476	67.2228	67.0265
PB.473.2	ENSG00000117335	CD46	ENST00000367042	FSM	1419.98	0.150655	0.212266	0.709745	0.477862	0.627544	Not	CD46-PB.473.2-Anno	Annotated	1291.07	1534.53	87.3695	102.381	74.0778	82.6348	88.944	88.9897	102.201	139.256	109.946	68.0136	104.135	90.5521
PB.473.3	ENSG00000117335	CD46	ENST00000354848	FSM	98.9875	1.08258	0.749378	1.44464	0.14856	0.27017	Not	CD46-PB.473.3-Anno	Annotated	83.228	111.538	6.0078	7.75148	15.7924	7.44374	0	2.50541	4.29745	15.3914	6.27816	2.17458	5.60935	9.30394
PB.473.4	ENSG00000117335	CD46	ENST00000357714	FSM	1012.56	0.527193	0.187367	2.81369	0.00489767	0.0164925	Not	CD46-PB.473.4-Anno	Annotated	789.21	1251.82	56.6133	87.7149	60.6598	62.4933	57.0996	52.1515	50.6624	133.81	83.9217	95.336	70.3591	55.1474
PB.3473.1	ENSG00000196776	CD47	ENST00000355354	FSM	12651	0.326551	0.133352	2.44879	0.0143336	0.0414215	Not	CD47-PB.3473.1-Anno	Annotated	10924.1	14419.7	477.84	613.99	527.185	371.625	551.753	470.954	467.681	608.928	636.483	533.055	624.154	667.328
PB.3473.3	ENSG00000196776	CD47	ENST00000361309	ISM	62.7676	0.561634	0.336618	1.66846	0.0952237	0.191301	Not	CD47-PB.3473.3-Anno	Annotated	49.8368	76.0151	5.23166	7.7449	5.89455	2.64843	5.62449	5.93789	6.05292	7.60017	7.39455	7.02202	8.85709	7.85067
PB.472.1	ENSG00000196352	CD55	ENST00000367064	FSM	5124.41	-0.993061	0.167477	-5.92953	3.03805e-09	4.22953e-08	Not	CD55-PB.472.1-Anno	Annotated	6624.2	3530	975.021	505.989	926.426	1223.85	870.532	1049.97	804.325	410.802	466.999	647.298	542.821	462.023
PB.290.1	ENSG00000116815	CD58	ENST00000369487	FSM	190.605	0.0652705	0.572867	0.113937	0.909288	0.945402	Not	CD58-PB.290.1-Anno	Annotated	185.381	195.49	19.371	19.3774	37.9392	10.1142	13.7415	26.6929	8.36718	16.3177	21.7554	18.7874	7.32605	32.7002
PB.290.2	ENSG00000116815	CD58	ENST00000369487	FSM	173.484	0.0589291	1.06607	0.0552767	0.955918	0.974719	Not	CD58-PB.290.2-Anno	Annotated	180.419	165.11	18.707	17.1956	0.00200755	26.5081	19.342	18.09	29.5929	20.6306	16.3711	18.8324	26.3315	3.81214
PB.891.1	ENSG00000085063	CD59	ENST00000351554	FSM	3198.92	0.645396	0.179016	3.60525	0.00031185	0.00151181	Not	CD59-PB.891.1-Anno	Annotated	2430.64	4010.02	99.0767	159.293	91.3714	134.802	92.174	62.531	114.505	141.533	229.417	174.361	140.246	110.909
PB.891.2	ENSG00000085063	CD59	ENST00000642928	FSM	7468.87	0.565464	0.151892	3.7228	0.000197028	0.00100866	Not	CD59-PB.891.2-Anno	Annotated	5893.57	9068.68	244.395	367.102	292.01	256.652	165.201	224.752	283.359	410.458	395.526	350.756	359.692	319.079
PB.904.1	ENSG00000085117	CD82	ENST00000227155	FSM	632.422	0.771843	0.148795	5.18728	2.13387e-07	2.1453e-06	Not	CD82-PB.904.1-Anno	Annotated	453.884	811.125	65.7942	114.084	93.6397	80.0253	55.8251	48.5165	50.9643	139.38	122.122	79.4822	124.995	104.438
PB.5387.1	ENSG00000102181	CD99L2	ENST00000370377	FSM	969.893	-0.400425	0.140434	-2.85135	0.00435347	0.0149056	Not	CD99L2-PB.5387.1-Anno	Annotated	1085.2	858	68.9826	52.9886	62.7237	56.9948	101.582	61.0823	62.53	50.9163	57.0219	57.6244	56.9799	42.4006
PB.5032.1	ENSG00000081377	CDC14B	ENST00000375242	FSM	827.961	-0.684554	0.122899	-5.57007	2.54637e-08	3.08041e-07	Not	CDC14B-PB.5032.1-Anno	Annotated	997	655.2	86.4965	55.1635	81.2145	61.0525	105.766	101.973	82.4768	41.9779	53.3413	66.5613	61.6583	52.279
PB.1526.1	ENSG00000130177	CDC16	ENST00000494766	FSM	311.79	0.200122	0.188062	1.06413	0.287271	0.443385	Not	CDC16-PB.1526.1-Anno	Annotated	288.4	340	35.1209	40.0642	30.7247	26.1917	56.5219	27.7811	34.385	41.7745	37.2467	42.2751	36.5687	42.4562
PB.4104.1	ENSG00000094880	CDC23	ENST00000394886	FSM	449.58	0.491704	0.0913468	5.38283	7.33242e-08	8.0983e-07	Not	CDC23-PB.4104.1-Anno	Annotated	364.6	544	26.2247	37.8728	26.6376	24.2217	32.8955	21.0381	26.3306	34.4383	33.5987	45.3213	35.4524	40.5535
PB.3029.1	ENSG00000101224	CDC25B	ENST00000245960	FSM	380.116	0.0334015	0.217826	0.15334	0.87813	0.925759	Not	CDC25B-PB.3029.1-Anno	Annotated	374.554	389.79	22.9554	23.3063	20.7616	16.8392	38.9905	22.2373	15.9486	26.5287	20.644	22.4609	29.5631	17.3345
PB.3029.2	ENSG00000101224	CDC25B	ENST00000439880	FSM	78.832	-0.450866	0.686246	-0.657004	0.511178	0.656892	Not	CDC25B-PB.3029.2-Anno	Annotated	84.3392	73.0123	6.36088	5.31528	12.7977	3.96241	7.87356	1.24817	5.92261	9.82348	2.44207	3.25299	9.47558	1.5823
PB.3029.3	ENSG00000101224	CDC25B	novel	NNC	592.479	0.872301	0.269553	3.2361	0.00121174	0.00495467	Not	CDC25B-PB.3029.3-novel	novel	428.907	773.797	35.8459	62.2826	48.7971	22.7422	45.3488	47.4743	14.8669	51.8829	52.8253	77.8268	70.4408	58.4372
PB.4342.1	ENSG00000168438	CDC40	ENST00000368932	ISM	140.281	-0.198543	0.231457	-0.857795	0.391005	0.548786	Not	CDC40-PB.4342.1-Anno	Annotated	145.902	137.44	22.0686	20.0646	18.5435	22.9771	31.4209	16.5361	20.8653	17.7898	13.3952	30.9568	18.6189	19.5625
PB.4342.2	ENSG00000168438	CDC40	ENST00000307731	FSM	704.39	-0.103322	0.114566	-0.901855	0.367134	0.525331	Not	CDC40-PB.4342.2-Anno	Annotated	708.474	696.399	40.9096	39.3048	40.2431	36.7138	46.2927	38.6406	42.6576	40.9283	36.9897	33.6691	42.9782	41.9586
PB.2668.1	ENSG00000163171	CDC42EP3	ENST00000295324	FSM	672.904	0.110685	0.28024	0.394965	0.692869	0.808798	Not	CDC42EP3-PB.2668.1-Anno	Annotated	632.769	715.332	46.5481	50.849	59.6275	34.2067	24.9158	53.2034	60.7869	43.108	36.3011	65.1643	43.5618	66.1096
PB.2668.4	ENSG00000163171	CDC42EP3	ENST00000295324	FSM	153.169	-0.840811	0.409173	-2.0549	0.0398885	0.0959222	Not	CDC42EP3-PB.2668.4-Anno	Annotated	192.031	110.268	33.737	18.5879	46.7602	16.1921	23.9017	27.0689	54.7623	9.09559	16.1629	18.3911	28.2063	21.0835
PB.2276.1	ENSG00000179604	CDC42EP4	ENST00000580315	FSM	736.086	-1.87582	0.282161	-6.64804	2.97019e-11	5.41572e-10	Not	CDC42EP4-PB.2276.1-Anno	Annotated	1107.06	340.59	78.6739	23.5093	125.416	73.9017	79.696	59.5865	54.7692	23.6666	30.2222	14.728	38.3724	10.5575
PB.2276.2	ENSG00000179604	CDC42EP4	ENST00000335793	FSM	1329.68	-0.848047	0.179532	-4.72365	2.31651e-06	1.90673e-05	Not	CDC42EP4-PB.2276.2-Anno	Annotated	1661.34	960.01	119.774	67.9133	119.182	121.349	76.3089	168.849	113.184	54.5688	85.9729	65.8484	80.8931	52.2833
PB.4079.1	ENSG00000158985	CDC42SE2	novel	NNC	1412.1	-0.0200654	0.107808	-0.186121	0.85235	0.909147	Not	CDC42SE2-PB.4079.1-novel	novel	1386.87	1447.48	83.7951	85.0869	78.1646	69.7938	93.6499	92.2884	85.0788	81.7087	77.1923	101.426	79.1602	85.9477
PB.4256.1	ENSG00000096401	CDC5L	ENST00000371477	FSM	350.72	0.0806363	0.15253	0.528658	0.597043	0.727914	Not	CDC5L-PB.4256.1-Anno	Annotated	330.651	375.441	30.6313	33.7142	25.98	32.1422	32.7158	26.3598	35.9589	27.6144	36.9355	45.4153	27.7547	30.8512
PB.4256.2	ENSG00000096401	CDC5L	ENST00000371477	FSM	754.298	0.106612	0.153211	0.695852	0.486521	0.635418	Not	CDC5L-PB.4256.2-Anno	Annotated	707.549	807.159	55.9961	62.3014	53.8437	66.0745	56.4278	54.5493	49.0851	67.3393	54.6682	74.4337	56.541	58.5249
PB.441.1	ENSG00000134371	CDC73	ENST00000367435	FSM	2024.39	-0.158611	0.0747735	-2.12123	0.0339028	0.0840252	Not	CDC73-PB.441.1-Anno	Annotated	2076.41	1976.78	92.5099	85.5445	101.138	88.7971	98.8545	90.2596	83.5003	76.7996	88.8084	97.2359	86.5789	78.2994
PB.4751.1	ENSG00000184661	CDCA2	ENST00000330560	FSM	140.818	2.38811	0.319524	7.47396	7.78197e-14	1.96587e-12	Up	CDCA2-PB.4751.1-Anno	Annotated	44.6	244.8	4.46672	23.576	6.13138	5.36318	4.97019	2.72842	3.14042	23.031	16.4551	29.7357	22.1897	26.4686
PB.2002.1	ENSG00000140937	CDH11	ENST00000268603	FSM	4860.67	0.903292	0.196931	4.58684	4.50001e-06	3.41656e-05	Not	CDH11-PB.2002.1-Anno	Annotated	3322.18	6608.14	199.86	382.912	197.647	107.84	236.391	223.591	233.831	336.214	311.664	582.689	297.638	386.355
PB.2002.3	ENSG00000140937	CDH11	ENST00000268603	FSM	363.542	-0.304481	2.55044	-0.119384	0.904971	0.942271	Not	CDH11-PB.2002.3-Anno	Annotated	330.424	441.648	24.4713	30.8114	7.2647	11.8232	70.5533	0.000477684	32.7147	38.2649	1.67061e-05	96.3188	19.4733	2.89567e-05
PB.1722.1	ENSG00000186073	CDIN1	ENST00000566621	FSM	194.894	0.161466	0.174183	0.926993	0.35393	0.512299	Not	C15orf41-PB.1722.1-Anno	Annotated	178.729	213.431	14.148	16.3935	13.8631	16.2016	15.8793	12.011	12.7853	12.4582	15.4809	20.1546	16.7587	17.1153
PB.1722.2	ENSG00000186073	CDIN1	ENST00000437989	FSM	19.3009	-0.106167	0.811095	-0.130893	0.89586	0.93731	Not	C15orf41-PB.1722.2-Anno	Annotated	17.2712	21.3695	1.62922	1.95599	1.3457	1.82554	1.52617	0.380297	3.06839	3.04339	2.11332	1.72679	0	2.89646
PB.4565.5	ENSG00000058091	CDK14	ENST00000380050	FSM	1028.15	0.239389	0.132431	1.80765	0.0706604	0.150715	Not	CDK14-PB.4565.5-Anno	Annotated	922.438	1150.55	43.1055	52.3215	35.5037	32.8941	47.5334	49.4911	50.1051	44.3504	45.8788	68.8321	51.2877	51.2587
PB.2937.1	ENSG00000138395	CDK15	ENST00000652192	FSM	213.349	0.170541	0.200225	0.851747	0.394354	0.552001	Not	CDK15-PB.2937.1-Anno	Annotated	196.959	230.832	12.1209	13.8968	9.28255	10.72	16.0534	11.6384	12.9103	14.5494	12.6216	13.2756	13.7238	15.3134
PB.5280.1	ENSG00000102225	CDK16	ENST00000357227	FSM	1582.52	0.178498	0.145987	1.2227	0.221443	0.366474	Not	CDK16-PB.5280.1-Anno	Annotated	1440.8	1744.4	104.438	122.631	119.634	114.465	99.5984	91.7972	96.6945	116.07	104.779	156.885	128.76	106.659
PB.1295.2	ENSG00000059758	CDK17	ENST00000261211	FSM	86.5306	-9.13108	3.02713	-3.01642	0.00255778	0.00947676	Down	CDK17-PB.1295.2-Anno	Annotated	166.981	0.0720085	9.87583	0.00404977	27.324	7.93975	2.4982	11.6172	2.68504e-06	9.54719e-08	0.000103758	4.88109e-07	0.00431093	0.0158336
PB.1295.1	ENSG00000059758	CDK17	ENST00000543119	FSM	1183.23	0.0478157	0.125174	0.381992	0.702467	0.81688	Not	CDK17-PB.1295.1-Anno	Annotated	1129.86	1248.18	56.6065	60.8411	55.0387	59.302	56.4721	58.9945	53.2254	54.0061	55.9775	78.156	58.3345	57.7316
PB.1295.3	ENSG00000059758	CDK17	ENST00000261211	FSM	709.916	1.19925	0.204986	5.85039	4.90415e-09	6.69334e-08	Not	CDK17-PB.1295.3-Anno	Annotated	425.356	1022.75	25.0219	58.7067	15.7291	32.0796	24.2014	21.1486	31.9508	47.6567	56.5746	83.9204	47.0527	58.3293
PB.2217.1	ENSG00000108465	CDK5RAP3	novel	NIC	639.954	-0.076284	0.129581	-0.588696	0.556065	0.695658	Not	CDK5RAP3-PB.2217.1-novel	novel	639.2	638.8	49.1905	47.7567	59.4398	40.8319	57.5677	43.1763	44.9368	54.0806	45.4206	40.3579	50.2302	48.6941
PB.4572.1	ENSG00000105810	CDK6	ENST00000424848	FSM	1279.44	0.804251	0.144128	5.58011	2.40364e-08	2.92949e-07	Not	CDK6-PB.4572.1-Anno	Annotated	901.218	1692.87	97.8905	177.975	105.34	107.441	98.9955	82.7865	94.89	174.754	145.391	225.345	148.424	195.959
PB.1412.1	ENSG00000132964	CDK8	ENST00000381527	FSM	521.298	0.188816	0.214853	0.878814	0.379502	0.537712	Not	CDK8-PB.1412.1-Anno	Annotated	473.4	578.4	34.59	41.0827	33.2429	44.0818	33.4469	34.2842	27.8943	40.6344	35.2327	58.4135	32.329	38.8037
PB.4206.1	ENSG00000145996	CDKAL1	novel	NIC	114.179	-0.410994	0.287718	-1.42846	0.153159	0.27701	Not	CDKAL1-PB.4206.1-novel	novel	126.621	99.6749	12.2605	9.42214	12.7478	7.48264	13.4138	13.0893	14.5689	11.1763	9.71615	6.62439	10.0614	9.53247
PB.4206.2	ENSG00000145996	CDKAL1	ENST00000274695	FSM	845.555	-0.235103	0.113373	-2.07371	0.0381063	0.0923995	Not	CDKAL1-PB.4206.2-Anno	Annotated	891.756	796.602	62.4488	54.1565	73.1195	51.0109	74.6575	55.246	58.2103	57.5345	52.9171	49.893	57.5395	52.8985
PB.3748.1	ENSG00000138769	CDKL2	ENST00000429927	ISM	18.9587	0.0489593	0.601462	0.0814006	0.935123	0.9627	Not	CDKL2-PB.3748.1-Anno	Annotated	18.2	19.8	3.01821	3.10719	5.77292	3.06808	2.65285	1.83755	1.75965	3.94356	2.63019	3.42998	1.47944	4.05275
PB.2279.1	ENSG00000109089	CDR2L	ENST00000337231	FSM	526.978	0.675064	0.197546	3.41725	0.000632565	0.00282964	Not	CDR2L-PB.2279.1-Anno	Annotated	402.2	656.8	25.5922	40.4017	39.4089	23.3533	21.206	27.6899	16.303	39.6521	41.8839	39.3936	41.1545	39.9246
PB.2516.1	ENSG00000153879	CEBPG	ENST00000284000	FSM	761.8	-0.00350078	0.136643	-0.02562	0.97956	0.988257	Not	CEBPG-PB.2516.1-Anno	Annotated	743.6	785.2	44.6395	45.6997	48.3369	55.3699	45.1243	34.6122	39.7541	40.0531	45.6162	55.6764	39.3348	47.8178
PB.2666.1	ENSG00000115816	CEBPZ	ENST00000234170	FSM	1063.77	-0.141561	0.200025	-0.707715	0.479122	0.628367	Not	CEBPZ-PB.2666.1-Anno	Annotated	1086.29	1042.51	71.1124	66.6762	57.0172	88.6845	68.4643	76.9181	64.4781	59.0889	60.6517	82.1644	52.3733	79.1025
PB.2666.3	ENSG00000115816	CEBPZ	ENST00000234170	FSM	196.541	-0.601705	1.02645	-0.586199	0.557742	0.696966	Not	CEBPZ-PB.2666.3-Anno	Annotated	176.13	209.749	12.6882	14.8081	27.2764	6.22751	3.46272	11.9766	14.4976	31.2963	18.0147	1.06063	23.6685	0.000306471
PB.2666.4	ENSG00000115816	CEBPZ	ENST00000234170	FSM	23.802	1.75097	1.89264	0.925146	0.35489	0.512561	Not	CEBPZ-PB.2666.4-Anno	Annotated	7.77707	46.9373	0.568819	3.09235	0.00130853	0.00108995	2.75269	0	0.089011	0.708631	9.7642e-05	14.6872	0.0654726	0.000406104
PB.574.1	ENSG00000048740	CELF2	novel	NIC	32.5192	1.17168	1.81648	0.645028	0.518909	0.664157	Not	CELF2-PB.574.1-novel	novel	25.3462	43.1208	2.16162	3.45811	0	0	3.20602	0	7.60208	0	1.71898e-05	11.0093	2.15864	4.12259
PB.574.2	ENSG00000048740	CELF2	novel	NIC	65.6214	-0.001473	1.30589	-0.00112796	0.9991	0.999388	Not	CELF2-PB.574.2-novel	novel	45.3365	85.1865	3.82286	7.2016	0	4.33449	3.4205	6.70764	4.65165	0	18.6433	4.43762	12.9268	0.000275473
PB.574.3	ENSG00000048740	CELF2	novel	NIC	309.537	-0.192321	0.316123	-0.608375	0.542939	0.686405	Not	CELF2-PB.574.3-novel	novel	313.945	306.242	27.7557	26.4628	26.1604	31.6867	21.318	32.1107	27.5029	28.8422	29.8899	35.4625	27.3871	10.7324
PB.574.4	ENSG00000048740	CELF2	novel	NIC	214.721	0.0862679	0.326564	0.264168	0.79165	0.877548	Not	CELF2-PB.574.4-novel	novel	205.555	225.505	18.8497	20.0317	16.5117	8.41503	28.6532	24.2263	16.4424	11.3809	17.9895	19.5368	21.4456	29.8054
PB.574.5	ENSG00000048740	CELF2	ENST00000608830	FSM	149.812	-0.305259	0.4371	-0.698372	0.484945	0.634446	Not	CELF2-PB.574.5-Anno	Annotated	165.443	133.454	14.2632	11.1193	16.7729	5.57722	21.2873	17.8487	9.82978	8.46591	14.4146	8.33234	12.3351	12.0485
PB.574.6	ENSG00000048740	CELF2	novel	NIC	671.463	-1.19493	0.103112	-11.5887	4.70374e-31	5.02721e-29	Not	CELF2-PB.574.6-novel	novel	910.775	422.092	79.6135	35.8637	81.7617	61.7259	99.1839	74.8639	80.5321	35.707	27.5869	39.2029	43.8935	32.9283
PB.1855.1	ENSG00000103888	CEMIP	ENST00000220244	FSM	982.03	2.61223	0.234367	11.1459	7.50197e-29	7.23836e-27	Up	CEMIP-PB.1855.1-Anno	Annotated	255.2	1773.2	7.8076	52.5873	8.38012	9.2658	7.26679	8.31924	5.80606	26.0286	64.7889	75.4937	63.3702	33.2552
PB.2067.1	ENSG00000177946	CENPBD1P	ENST00000646748	FSM	163.255	0.151521	0.294227	0.51498	0.606567	0.736682	Not	CENPBD1-PB.2067.1-Anno	Annotated	149.582	177.182	12.7826	14.7461	12.7219	10.8785	17.0111	9.48461	13.8169	18.601	18.9557	11.3229	13.9513	10.8998
PB.2067.2	ENSG00000177946	CENPBD1P	ENST00000646748	FSM	121.221	-0.592327	0.299615	-1.97696	0.048046	0.111073	Not	CENPBD1-PB.2067.2-Anno	Annotated	141.261	99.0743	18.6515	12.5514	33.0385	10.7535	17.6711	15.6953	16.0989	12.8115	6.55422	10.5006	18.3251	14.5656
PB.488.1	ENSG00000117724	CENPF	ENST00000366955	ISM	197.602	4.48445	0.33406	13.4241	4.37014e-41	9.1998e-39	Up	CENPF-PB.488.1-Anno	Annotated	16.8	394	3.00481	68.7888	1.61386	3.07801	4.43914	3.75337	2.13968	60.7692	49.4634	93.5878	60.0954	80.0282
PB.1408.2	ENSG00000151849	CENPJ	novel	NIC	75.0466	0.0393312	0.352324	0.111634	0.911114	0.945832	Not	CENPJ-PB.1408.2-novel	novel	72.5063	77.7584	8.09727	8.48516	6.64883	5.86267	12.0884	7.13005	8.75633	7.58776	7.72685	6.84211	12.5545	7.71459
PB.2014.1	ENSG00000102901	CENPT	ENST00000569862	FSM	527.617	-0.0399936	0.161825	-0.24714	0.8048	0.882468	Not	CENPT-PB.2014.1-Anno	Annotated	524	532.8	40.2606	39.7076	44.9812	34.9668	54.1891	29.4086	37.7575	44.1825	34.1326	36.3052	39.817	44.1008
PB.12.1	ENSG00000116198	CEP104	ENST00000461667	ISM	336.46	0.330348	0.169891	1.94447	0.0518392	0.117997	Not	CEP104-PB.12.1-Anno	Annotated	290	386.8	27.1573	35.2311	27.9291	32.2087	24.6451	24.6476	26.3561	34.394	31.3066	42.1998	32.3341	35.921
PB.4068.1	ENSG00000168944	CEP120	ENST00000306467	FSM	712.022	-0.318643	0.111666	-2.85355	0.00432344	0.0148247	Not	CEP120-PB.4068.1-Anno	Annotated	773.6	652	34.8458	28.5625	33.0627	26.4495	43.2946	36.0289	35.3931	28.4516	27.1376	32.7063	28.3165	26.2006
PB.2302.1	ENSG00000141577	CEP131	ENST00000450824	FSM	182.319	-0.261125	0.2506	-1.042	0.297411	0.453992	Not	CEP131-PB.2302.1-Anno	Annotated	194.4	169.4	11.9664	10.0922	15.4553	10.7052	15.446	8.68829	9.53731	9.70469	12.243	8.08026	10.9198	9.51344
PB.1764.1	ENSG00000103995	CEP152	ENST00000399334	ISM	201.922	1.73603	0.256507	6.76796	1.30612e-11	2.49276e-10	Not	CEP152-PB.1764.1-Anno	Annotated	90.6	321.2	7.09131	24.4989	6.57433	7.23576	7.23127	8.65729	5.75792	23.4019	21.5832	28.7101	19.1937	29.6057
PB.3660.1	ENSG00000174007	CEP19	ENST00000409690	FSM	140.827	-0.0350694	0.217651	-0.161127	0.871994	0.922892	Not	CEP19-PB.3660.1-Anno	Annotated	139.524	141.679	23.9659	23.4082	32.5518	14.4459	26.2491	23.6388	22.9438	24.0124	21.1678	21.345	25.4531	25.0624
PB.4649.1	ENSG00000106477	CEP41	ENST00000223208	FSM	109.846	0.467399	0.321432	1.45412	0.145914	0.266473	Not	CEP41-PB.4649.1-Anno	Annotated	89.2165	133.51	7.93828	11.3505	11.5472	6.32258	6.96246	7.21587	7.64322	8.80239	11.8385	16.4536	9.42709	10.2308
PB.4649.2	ENSG00000106477	CEP41	ENST00000675596	FSM	23.5535	1.42394	1.08178	1.31629	0.188078	0.323014	Not	CEP41-PB.4649.2-Anno	Annotated	13.1835	34.0904	1.26787	3.30047	0	1.51722	1.96994	1.17575	1.67643	4.08188	2.99619	2.33651	6.05324	1.03451
PB.1012.1	ENSG00000166037	CEP57	ENST00000325542	FSM	623.544	0.13793	0.156303	0.882453	0.377532	0.535685	Not	CEP57-PB.1012.1-Anno	Annotated	574.268	681.506	41.1687	47.1983	45.9474	32.9266	41.162	43.0915	42.7161	40.7079	39.6892	61.754	40.1392	53.7011
PB.1012.2	ENSG00000166037	CEP57	ENST00000538658	FSM	355.926	0.570851	0.102933	5.54586	2.92517e-08	3.50364e-07	Not	CEP57-PB.1012.2-Anno	Annotated	279.932	440.094	20.5951	31.1909	26.1517	15.8206	24.2527	16.0819	20.6687	33.054	24.5627	37.3321	28.5672	32.4383
PB.2731.1	ENSG00000011523	CEP68	ENST00000377990	FSM	739.253	-0.795083	0.15094	-5.26755	1.38253e-07	1.45082e-06	Not	CEP68-PB.2731.1-Anno	Annotated	911.8	555.2	62.0891	36.7028	81.8791	54.7195	67.1209	49.3122	57.4136	39.4613	37.0284	31.674	45.0664	30.2842
PB.4357.1	ENSG00000111860	CEP85L	ENST00000419517	ISM	491.123	-0.626548	0.158621	-3.94997	7.81602e-05	0.000446162	Not	CEP85L-PB.4357.1-Anno	Annotated	581.362	395.663	28.2132	18.6993	31.5222	22.5222	34.4812	29.4933	23.0471	17.4277	20.5112	16.3982	21.8913	17.268
PB.2517.1	ENSG00000121289	CEP89	ENST00000305768	FSM	278.904	0.295091	0.169782	1.73806	0.0822004	0.170055	Not	CEP89-PB.2517.1-Anno	Annotated	246.6	315	21.6912	26.9508	19.3663	15.5072	29.2862	23.5997	20.6968	28.1163	24.6201	29.218	26.1877	26.6121
PB.3466.1	ENSG00000182504	CEP97	ENST00000341893	ISM	208.396	0.497233	0.184591	2.6937	0.00706648	0.0226225	Not	CEP97-PB.3466.1-Anno	Annotated	168.6	251.8	24.2511	35.2983	20.3884	28.0675	26.0258	23.9286	22.8451	35.5125	32.6094	41.9909	31.9868	34.392
PB.274.1	ENSG00000134255	CEPT1	ENST00000700751	ISM	268.556	0.17463	0.167282	1.04392	0.296521	0.45313	Not	CEPT1-PB.274.1-Anno	Annotated	245.6	291.6	17.8245	20.5436	23.6368	16.4473	19.6214	13.0438	16.3733	25.0089	19.0604	17.2369	22.5363	18.8757
PB.3279.1	ENSG00000100422	CERK	ENST00000216264	FSM	787.102	0.326407	0.135805	2.4035	0.0162388	0.0458955	Not	CERK-PB.3279.1-Anno	Annotated	684.755	897.836	34.3743	43.5962	44.7039	27.6371	40.8345	31.6387	27.0571	42.7647	40.7198	44.2914	44.7375	45.4678
PB.1177.1	ENSG00000139624	CERS5	ENST00000317551	FSM	607.542	0.309182	0.0803499	3.84795	0.000119112	0.000646461	Not	CERS5-PB.1177.1-Anno	Annotated	528.978	695.475	53.1076	67.5978	55.5156	47.7788	65.7332	48.1	48.4102	68.7329	63.8465	78.7019	61.438	65.2697
PB.3997.1	ENSG00000113163	CERT1	ENST00000644072	FSM	197.364	-0.46776	0.245684	-1.90391	0.0569214	0.127272	Not	COL4A3BP-PB.3997.1-Anno	Annotated	225.509	166.03	21.8288	15.6921	24.7016	33.3146	16.0225	20.2243	14.8811	12.7367	17.0818	16.252	17.7293	14.6606
PB.3997.3	ENSG00000113163	CERT1	ENST00000645483	FSM	418.714	-0.113684	0.151585	-0.749967	0.453275	0.606919	Not	COL4A3BP-PB.3997.3-Anno	Annotated	421.197	420.523	49.5714	47.7837	49.2523	39.8119	54.8437	49.099	54.8503	43.8749	40.6941	63.1249	36.2575	54.9668
PB.3997.4	ENSG00000113163	CERT1	ENST00000647127	FSM	757.785	-0.130424	0.143397	-0.909531	0.36307	0.521018	Not	COL4A3BP-PB.3997.4-Anno	Annotated	773.288	738.991	98.117	90.2528	139.972	73.7654	106.413	78.0285	92.4059	96.9184	88.5965	78.2961	92.736	94.717
PB.2005.1	ENSG00000172831	CES2	ENST00000317091	ISM	170.033	0.18712	0.189747	0.986152	0.324059	0.48196	Not	CES2-PB.2005.1-Anno	Annotated	155.69	185.648	9.25291	10.6767	12.0149	8.31913	10.5736	8.82029	6.53659	10.8343	11.9821	10.676	10.0798	9.81137
PB.2005.2	ENSG00000172831	CES2	ENST00000417689	FSM	23.0747	-1.08787	0.821337	-1.32451	0.185333	0.320116	Not	CES2-PB.2005.2-Anno	Annotated	32.1441	14.3779	2.36293	1.00918	1.96022	1.08967	5.42467	0.541557	2.79853	0.598808	1.34102	1.38103	1.39168	0.333364
PB.2005.3	ENSG00000172831	CES2	ENST00000317091	FSM	253.724	-0.718085	0.300595	-2.38888	0.0168999	0.0474741	Not	CES2-PB.2005.3-Anno	Annotated	299.689	204.052	20.8537	13.8946	23.2157	18.104	25.2357	18.2767	19.4363	15.2728	16.7619	10.0625	20.7412	6.63441
PB.2005.5	ENSG00000172831	CES2	ENST00000317091	FSM	28.3364	-3.06209	1.8153	-1.68682	0.0916384	0.185818	Not	CES2-PB.2005.5-Anno	Annotated	47.2814	9.47592	4.52707	0.817297	8.64246	2.03859	6.59129	0	5.363	0	1.63914	2.44735	0	0
PB.2005.7	ENSG00000172831	CES2	ENST00000317091	ISM	19.1026	2.78038	2.98168	0.93249	0.351083	0.50964	Not	CES2-PB.2005.7-Anno	Annotated	3.59528	34.2465	0.43881	4.33462	0	2.19405	0	0	0	7.96205	0	0.0605498	0	13.6505
PB.1563.1	ENSG00000165410	CFL2	ENST00000298159	FSM	179.062	0.88138	0.553307	1.59293	0.111175	0.215496	Not	CFL2-PB.1563.1-Anno	Annotated	132.326	228.519	9.98035	16.5112	14.3146	1.52771	14.0552	11.8315	8.17263	15.9706	21.051	13.679	12.9053	18.9498
PB.1563.2	ENSG00000165410	CFL2	ENST00000298159	FSM	1230.84	0.0732541	0.123924	0.591122	0.554439	0.694874	Not	CFL2-PB.1563.2-Anno	Annotated	1170.07	1309.08	86.5049	93.6688	88.8341	60.4828	96.2083	89.424	97.5752	89.4043	78.9898	123.778	89.8113	86.3606
PB.2929.1	ENSG00000003402	CFLAR	ENST00000309955	FSM	923.191	-0.554864	0.249682	-2.22228	0.0262643	0.0684388	Not	CFLAR-PB.2929.1-Anno	Annotated	1066.76	767.272	111.882	78.1523	123.5	78.8033	136.669	85.0901	135.348	74.4579	92.2562	58.0467	101.43	64.5703
PB.2929.2	ENSG00000003402	CFLAR	ENST00000309955	FSM	1669.4	0.00543371	0.213241	0.0254816	0.979671	0.988257	Not	CFLAR-PB.2929.2-Anno	Annotated	1617.69	1729.8	184.121	190.178	237.611	153.819	127.329	198.581	203.265	184.362	139.937	251.392	186.166	189.033
PB.3450.4	ENSG00000163320	CGGBP1	ENST00000309534	FSM	424.743	-4.56605	1.37076	-3.33103	0.000865246	0.0037219	Down	CGGBP1-PB.3450.4-Anno	Annotated	649.673	199.748	34.2135	9.86253	62.9838	25.4791	27.1004	37.0934	18.4108	18.2519	1.32974	29.5896	0.13728	0.00414674
PB.3450.1	ENSG00000163320	CGGBP1	ENST00000482016	FSM	600.452	0.0780652	0.326334	0.239219	0.810936	0.884808	Not	CGGBP1-PB.3450.1-Anno	Annotated	612.705	592.634	29.9966	28.4926	20.9642	7.26686	46.9866	53.3341	21.4311	20.0067	24.4784	29.9526	48.7392	19.286
PB.3450.2	ENSG00000163320	CGGBP1	ENST00000309534	FSM	1086.71	0.923256	0.24625	3.74926	0.000177356	0.000916055	Not	CGGBP1-PB.3450.2-Anno	Annotated	770.442	1416.62	38.8362	69.6624	22.1535	28.9322	55.3307	23.6161	64.1487	54.1312	82.7882	60.496	68.5213	82.375
PB.3450.3	ENSG00000163320	CGGBP1	ENST00000482016	FSM	61.1219	2.01358	1.95795	1.02841	0.303756	0.461345	Not	CGGBP1-PB.3450.3-Anno	Annotated	81.5392	42.3202	3.84715	1.92882	5.89443e-07	18.8457	0.217037	0.172979	1.75919e-06	0.131032	0.00411063	9.18048	0.320413	0.0080777
PB.3450.5	ENSG00000163320	CGGBP1	novel	NIC	181.665	-0.270355	0.191701	-1.4103	0.158452	0.284508	Not	CGGBP1-PB.3450.5-novel	novel	193.241	170.676	27.4599	23.3941	32.2323	20.6069	34.1594	25.0687	25.2321	20.4454	22.5865	26.8962	28.9829	18.0597
PB.2429.1	ENSG00000167670	CHAF1A	ENST00000301280	FSM	398.543	1.20597	0.149392	8.07253	6.88556e-16	2.08882e-14	Not	CHAF1A-PB.2429.1-Anno	Annotated	235.8	576.4	15.7648	37.2162	18.4112	16.2875	19.3696	12.5731	12.1827	35.1489	31.6918	47.0799	34.5877	37.5728
PB.1529.1	ENSG00000198824	CHAMP1	ENST00000361283	FSM	469.922	0.924551	0.421338	2.19432	0.0282122	0.0725353	Not	CHAMP1-PB.1529.1-Anno	Annotated	381.566	572.761	23.0001	32.8155	36.7966	8.77452	51.468	8.80587	9.15582	36.1982	31.7878	30.5172	39.597	25.9772
PB.1529.2	ENSG00000198824	CHAMP1	ENST00000361283	FSM	139.904	-3.49491	0.8885	-3.93349	8.37211e-05	0.000474784	Down	CHAMP1-PB.1529.2-Anno	Annotated	248.434	17.8394	14.1662	1.03463	0.00156801	17.0045	1.344	22.2615	30.2192	0.125426	2.65708	0.0304937	2.06154	0.29861
PB.4663.1	ENSG00000106554	CHCHD3	ENST00000262570	ISM	387.829	0.63563	0.146658	4.33408	1.46371e-05	9.95922e-05	Not	CHCHD3-PB.4663.1-Anno	Annotated	294.2	490	26.0064	41.8737	30.0937	23.9037	26.2073	25.3303	24.497	40.7532	37.8671	51.1591	34.5858	45.0033
PB.316.1	ENSG00000131778	CHD1L	ENST00000492728	FSM	282.328	0.280348	0.141857	1.97627	0.0481245	0.111119	Not	CHD1L-PB.316.1-Anno	Annotated	249.368	318.055	19.6926	24.2207	28.404	14.5156	19.8558	18.7892	16.8985	26.6271	19.3117	26.056	23.9181	25.1906
PB.1099.1	ENSG00000111642	CHD4	ENST00000544040	FSM	7898.76	-0.156015	0.140495	-1.11047	0.266799	0.42077	Not	CHD4-PB.1099.1-Anno	Annotated	8108.6	7692	272.217	250.892	328.029	301.022	239.068	255.001	237.964	252.63	233.372	295.025	230.132	243.301
PB.2483.1	ENSG00000085872	CHERP	ENST00000546361	FSM	1030.27	-0.307262	0.130079	-2.36213	0.0181704	0.0506136	Not	CHERP-PB.2483.1-Anno	Annotated	1106.1	948.867	60.2984	50.2909	75.2234	58.0144	61.9034	48.8963	57.4546	54.1325	50.9404	48.9969	59.4335	37.9511
PB.1393.1	ENSG00000072609	CHFR	novel	NIC	435.901	0.622568	0.121681	5.1164	3.11414e-07	3.00055e-06	Not	CHFR-PB.1393.1-novel	novel	333.4	543.2	23.1095	36.5823	27.061	22.4565	26.0113	19.394	20.6249	42.5709	34.5868	33.7569	32.5005	39.4962
PB.819.1	ENSG00000177830	CHID1	ENST00000323578	FSM	501.69	0.0915596	0.110762	0.826634	0.408444	0.566247	Not	CHID1-PB.819.1-Anno	Annotated	473	538.4	39.6712	43.6772	41.4909	32.658	48.3345	35.5241	40.3484	43.1697	40.0083	56.4545	43.3397	35.414
PB.5329.1	ENSG00000188419	CHM	ENST00000357749	FSM	578.801	-0.113224	0.0769646	-1.47112	0.141259	0.259964	Not	CHM-PB.5329.1-Anno	Annotated	584.142	570.194	23.4224	22.3822	21.5502	25.7318	23.134	24.5414	22.1548	19.047	24.6221	21.8357	24.122	22.2841
PB.5329.2	ENSG00000188419	CHM	ENST00000357749	FSM	241.038	0.380411	0.282267	1.3477	0.177755	0.310696	Not	CHM-PB.5329.2-Anno	Annotated	207.668	279.421	13.3874	17.2294	18.5869	7.77015	18.8523	9.98902	11.7388	12.458	18.1609	20.4479	19.3961	15.6842
PB.2331.1	ENSG00000255112	CHMP1B	ENST00000526991	FSM	3293.28	0.14692	0.159942	0.918586	0.358312	0.516156	Not	CHMP1B-PB.2331.1-Anno	Annotated	3039.58	3580.61	225.455	257.992	259.828	251.139	200.148	228.225	187.937	262.104	219.333	326.574	250.519	231.432
PB.2331.2	ENSG00000255112	CHMP1B	ENST00000526991	FSM	1.0308	-1.54279	3.10546	-0.496799	0.619331	0.74709	Not	CHMP1B-PB.2331.2-Anno	Annotated	1.94145	0.00147151	0.161073	0.000114831	0.719074	0.0862916	0	0	0	1.04848e-07	0	2.07368e-08	0.000574031	0
PB.2769.1	ENSG00000115561	CHMP3	ENST00000263856	FSM	1345.81	-0.178075	0.0788519	-2.25835	0.0239238	0.0632898	Not	CHMP3-PB.2769.1-Anno	Annotated	1392.44	1301.93	160.407	145.245	170.329	135.176	194.113	152.097	150.321	138.58	142.335	155.576	144.682	145.053
PB.1738.1	ENSG00000187446	CHP1	ENST00000334660	FSM	3873.19	-0.30079	0.0999108	-3.01058	0.00260749	0.0096301	Not	CHP1-PB.1738.1-Anno	Annotated	4162.18	3562.47	291.36	242.177	358.178	307.688	278.873	244.536	267.522	245.7	231.325	251.352	260.521	221.985
PB.2968.1	ENSG00000123989	CHPF	ENST00000243776	FSM	1520.25	0.658695	0.122917	5.35886	8.37497e-08	9.10499e-07	Not	CHPF-PB.2968.1-Anno	Annotated	1156	1910.2	87.8674	140.033	121.342	70.0122	103.608	78.1935	66.1809	161.424	151.207	141.632	124.644	121.256
PB.4690.1	ENSG00000033100	CHPF2	ENST00000690444	FSM	286.46	0.452611	0.191356	2.36528	0.0180162	0.0502646	Not	CHPF2-PB.4690.1-Anno	Annotated	241.237	339.841	9.59398	12.9673	12.235	7.81181	14.6953	6.73648	6.49135	12.2738	13.1774	15.9895	10.5032	12.8926
PB.4690.2	ENSG00000033100	CHPF2	ENST00000035307	FSM	605.219	0.828817	0.0978745	8.46816	2.4929e-17	8.61602e-16	Not	CHPF2-PB.4690.2-Anno	Annotated	424.363	801.759	23.7954	43.4722	29.3989	21.6995	25.0746	21.4626	21.3416	45.179	40.8371	52.5719	39.3858	39.3872
PB.4433.1	ENSG00000136213	CHST12	ENST00000258711	FSM	337.018	-0.580317	0.150712	-3.85051	0.000117872	0.000640732	Not	CHST12-PB.4433.1-Anno	Annotated	392.446	277.829	43.3529	29.6276	60.3479	35.1772	42.0738	40.9665	38.199	32.4058	33.2344	29.5063	30.5853	22.406
PB.802.1	ENSG00000182022	CHST15	ENST00000435907	FSM	1209.78	-0.230323	0.125947	-1.82873	0.06744	0.144959	Not	CHST15-PB.802.1-Anno	Annotated	1269.4	1149	58.7996	51.5936	74.7494	58.5957	56.2037	49.2111	55.2382	50.4605	54.2532	57.6134	55.8409	39.8
PB.3560.1	ENSG00000175040	CHST2	ENST00000309575	FSM	167.509	0.819101	0.195747	4.18449	2.85801e-05	0.000180005	Not	CHST2-PB.3560.1-Anno	Annotated	119	219.6	8.91473	15.8068	13.6606	7.01737	8.31272	7.0919	8.49103	17.2679	15.479	17.7271	14.5957	13.9644
PB.2022.2	ENSG00000168802	CHTF8	ENST00000398235	FSM	191.942	0.287417	0.347617	0.826819	0.40834	0.566247	Not	CHTF8-PB.2022.2-Anno	Annotated	176.826	208.498	14.0611	15.9582	22.471	14.454	20.3146	7.81771	5.24819	16.8586	18.9088	13.0796	20.9497	9.99415
PB.2022.3	ENSG00000168802	CHTF8	ENST00000448552	FSM	367.604	0.00266854	0.147025	0.0181502	0.985519	0.990655	Not	CHTF8-PB.2022.3-Anno	Annotated	359.177	378.165	27.9843	28.6036	28.8879	22.4754	32.1432	22.8204	33.5947	30.0586	26.6191	30.8591	29.955	25.5262
PB.753.1	ENSG00000213341	CHUK	ENST00000370397	FSM	344.58	0.786111	0.126656	6.20666	5.41217e-10	8.24524e-09	Not	CHUK-PB.753.1-Anno	Annotated	247.434	450.919	15.7452	27.7992	16.9636	18.222	17.703	11.0172	14.8203	28.3384	26.8556	33.6274	23.3354	26.8393
PB.753.2	ENSG00000213341	CHUK	ENST00000370397	ISM	562.402	-0.0424666	0.100153	-0.424018	0.671553	0.790457	Not	CHUK-PB.753.2-Anno	Annotated	556.488	569.792	37.8256	37.5237	46.6645	31.9645	43.169	33.5463	33.7835	40.6488	34.2555	37.1762	36.2002	39.3379
PB.1627.1	ENSG00000258289	CHURC1	ENST00000549115	FSM	852.184	-0.673974	0.12491	-5.39566	6.82709e-08	7.57633e-07	Not	CHURC1-PB.1627.1-Anno	Annotated	1014.32	676.597	72.2663	47.3459	58.1533	55.7566	81.1135	89.5451	76.7631	34.4815	45.8599	42.6501	71.8368	41.9015
PB.1627.2	ENSG00000258289	CHURC1	ENST00000549115	FSM	172.335	1.90055	0.906499	2.09659	0.0360303	0.0883525	Not	CHURC1-PB.1627.2-Anno	Annotated	86.13	260.597	7.98853	23.0611	14.8536	6.00276	8.65439	0.000140435	10.4318	28.0006	21.4257	15.2398	27.2245	23.4148
PB.2778.1	ENSG00000144021	CIAO1	ENST00000488633	FSM	902.357	-0.0140231	0.0795828	-0.176208	0.86013	0.914497	Not	CIAO1-PB.2778.1-Anno	Annotated	883.473	921.877	57.3564	58.0529	72.0784	55.1254	61.3116	46.484	51.7826	64.1435	56.9787	57.0768	58.8204	53.2449
PB.2778.2	ENSG00000144021	CIAO1	ENST00000488633	FSM	14.8522	-2.34343	3.0472	-0.769045	0.441866	0.596164	Not	CIAO1-PB.2778.2-Anno	Annotated	29.6192	0	2.78508	0	9.51745	0	4.40793	0	0	0	0	0	0	0
PB.1994.1	ENSG00000005194	CIAPIN1	novel	NIC	264.121	-0.303325	0.223599	-1.35656	0.174922	0.306554	Not	CIAPIN1-PB.1994.1-novel	novel	285.741	241.723	44.5421	36.5412	46.8326	34.4028	63.7602	41.6361	36.0789	41.535	32.8653	29.9499	38.7752	39.5808
PB.1665.1	ENSG00000198894	CIPC	ENST00000361786	FSM	811.77	-0.310743	0.0798101	-3.89353	9.87961e-05	0.00054863	Not	CIPC-PB.1665.1-Anno	Annotated	871.041	740.115	44.8773	37.2806	57.1017	46.3456	38.6945	44.0497	38.1949	43.359	37.1522	28.9903	42.103	34.7986
PB.2415.1	ENSG00000099622	CIRBP	novel	NIC	2670.63	-0.75856	0.135402	-5.60227	2.11565e-08	2.60131e-07	Not	CIRBP-PB.2415.1-novel	novel	3278.8	2031.4	236.235	142.2	264.898	180.677	282.978	183.383	269.238	174.894	127.295	131.346	143.391	134.073
PB.644.1	ENSG00000122873	CISD1	ENST00000333926	FSM	289.754	1.22985	0.222335	5.5315	3.17512e-08	3.76631e-07	Not	CISD1-PB.644.1-Anno	Annotated	167.4	424.8	26.5148	65.2812	22.7006	32.8905	24.9467	25.6045	26.4317	57.8602	61.7853	94.5785	49.4722	62.7096
PB.5196.1	ENSG00000277972	CISD3	ENST00000619858	FSM	162.383	-0.642089	0.341806	-1.87852	0.0603101	0.132923	Not	CISD3-PB.5196.1-Anno	Annotated	187.333	134.198	24.2251	16.8311	34.2623	22.484	25.1806	17.2437	21.9549	15.1714	17.9299	12.6453	28.9587	9.45001
PB.1476.1	ENSG00000136108	CKAP2	ENST00000258607	FSM	332.359	1.63723	0.240261	6.81438	9.46692e-12	1.85782e-10	Not	CKAP2-PB.1476.1-Anno	Annotated	165.426	510.117	11.0205	33.2655	8.9542	18.8121	11.5616	6.64708	9.12743	29.9201	32.8901	36.8103	30.6331	36.0738
PB.1476.2	ENSG00000136108	CKAP2	ENST00000258607	FSM	223.855	1.6003	0.354395	4.51557	6.31472e-06	4.652e-05	Not	CKAP2-PB.1476.2-Anno	Annotated	115.774	341.883	7.11034	20.4201	7.48421	4.72111	7.02022	13.1124	3.21375	16.2992	17.2348	28.2639	19.4254	20.8771
PB.1317.17	ENSG00000136026	CKAP4	ENST00000378026	FSM	1025	1.30166	0.277408	4.69222	2.70255e-06	2.17048e-05	Not	CKAP4-PB.1317.17-Anno	Annotated	564.699	1544.62	65.5673	171.058	90.7062	48.3489	51.3392	52.7733	84.669	173.444	150.898	289.373	114.928	126.648
PB.1317.6	ENSG00000136026	CKAP4	ENST00000378026	FSM	43.0563	1.22716	0.446417	2.74891	0.00597944	0.0196032	Not	CKAP4-PB.1317.6-Anno	Annotated	25.4635	61.4557	1.82012	4.28916	0.987242	1.92498	2.79278	1.18303	2.21258	3.73774	5.9204	3.3276	2.86265	5.59743
PB.1317.4	ENSG00000136026	CKAP4	ENST00000378026	ISM	1109.66	2.08363	0.213547	9.75725	1.71751e-22	9.24928e-21	Up	CKAP4-PB.1317.4-Anno	Annotated	404.749	1892.74	65.4196	294.308	69.3479	46.9301	67.5134	81.1548	62.1516	255.812	209.955	471.38	227.018	307.375
PB.1317.1	ENSG00000136026	CKAP4	ENST00000378026	FSM	1074.54	2.30512	0.233966	9.85238	6.69404e-23	3.84326e-21	Up	CKAP4-PB.1317.1-Anno	Annotated	345.251	1837.72	24.9904	130.228	22.0395	33.6652	23.994	23.4417	21.8113	130.003	115.875	117.283	90.4535	197.523
PB.911.1	ENSG00000175216	CKAP5	ENST00000529230	FSM	2176.04	0.897218	0.107603	8.3382	7.54301e-17	2.48348e-15	Not	CKAP5-PB.911.1-Anno	Annotated	1474.13	2945.04	48.1192	93.2171	51.0154	46.6529	53.7878	43.2303	45.9095	83.3229	75.9203	118.996	89.7362	98.11
PB.911.2	ENSG00000175216	CKAP5	ENST00000312055	ISM	17.0141	-1.6847	3.0443	-0.553394	0.579994	0.715034	Not	CKAP5-PB.911.2-Anno	Annotated	32.8666	1.56073	2.05095	0.0934591	0	0	6.55408	0	3.70066	0.00035601	0	0	0	0.466939
PB.4014.1	ENSG00000247572	CKMT2-AS1	ENST00000660242	FSM	319.791	-0.39181	0.181981	-2.15303	0.0313165	0.0787105	Not	CKMT2-AS1-PB.4014.1-Anno	Annotated	353.246	283.665	40.9131	31.9395	44.8547	30.554	50.4909	34.5152	44.1508	40.1236	28.5403	26.1405	33.7716	31.1216
PB.347.1	ENSG00000173207	CKS1B	ENST00000308987	FSM	1287.26	-0.216169	0.0763981	-2.8295	0.00466204	0.0157832	Not	CKS1B-PB.347.1-Anno	Annotated	1344.68	1229.71	131.599	116.531	157.854	114	142.961	120.103	123.076	124.729	94.6647	125.21	115.05	123.001
PB.1902.1	ENSG00000103249	CLCN7	ENST00000382745	FSM	747.159	-0.00399983	0.165815	-0.0241222	0.980755	0.988582	Not	CLCN7-PB.1902.1-Anno	Annotated	738.4	758.8	44.2146	43.7218	72.5643	36.1703	47.5314	28.7086	36.0985	53.0134	39.4488	43.5461	48.9731	33.6278
PB.3599.1	ENSG00000013297	CLDN11	ENST00000486429	FSM	172.033	-1.24873	0.222275	-5.61792	1.93265e-08	2.40611e-07	Not	CLDN11-PB.3599.1-Anno	Annotated	235.68	103.03	44.7007	18.7451	68.6794	29.2529	38.8286	44.3797	42.3627	18.5889	18.576	16.4875	21.1777	18.8952
PB.4565.2	ENSG00000157224	CLDN12	ENST00000496677	FSM	72.3218	0.147725	1.08673	0.135935	0.891873	0.934516	Not	CLDN12-PB.4565.2-Anno	Annotated	78.138	66.5153	4.92516	4.06069	5.08522	0	9.06908	7.7434	2.72812	3.8522	5.27678	2.38249	3.28648	5.50552
PB.4565.4	ENSG00000157224	CLDN12	ENST00000287916	FSM	591.854	0.478853	0.244622	1.95752	0.0502865	0.11518	Not	CLDN12-PB.4565.4-Anno	Annotated	482.852	713.528	30.9274	44.2675	38.235	41.2233	22.4527	23.1716	29.5546	45.3526	41.1505	62.0864	40.3645	32.3834
PB.3455.1	ENSG00000080822	CLDND1	ENST00000503004	FSM	1303.98	-0.177425	0.182429	-0.972568	0.330768	0.488799	Not	CLDND1-PB.3455.1-Anno	Annotated	1338.8	1274	92.5678	85.683	86.0793	105.873	81.5358	101	88.3507	64.9391	77.9715	115.517	78.0799	91.9075
PB.1914.1	ENSG00000038532	CLEC16A	ENST00000409552	ISM	482.785	-0.197778	0.141378	-1.39894	0.161832	0.289084	Not	CLEC16A-PB.1914.1-Anno	Annotated	504.257	459.122	54.3708	48.2932	54.1065	71.019	54.7782	44.1631	47.7872	52.7631	47.7159	49.017	45.3708	46.5994
PB.66.1	ENSG00000169504	CLIC4	ENST00000374379	FSM	3721.03	0.709571	0.166226	4.26873	1.96593e-05	0.000129576	Not	CLIC4-PB.66.1-Anno	Annotated	2758.66	4744.09	143.391	239.637	150.438	94.4662	114.65	168.846	188.557	177.021	187.526	279.244	259.919	294.476
PB.66.2	ENSG00000169504	CLIC4	ENST00000374379	FSM	6261.36	0.251882	0.20943	1.2027	0.229092	0.375797	Not	CLIC4-PB.66.2-Anno	Annotated	5509.14	7132.91	288.704	362.616	277.054	295.908	259.636	327.322	283.601	316.755	359.885	520.887	265.577	349.976
PB.4151.2	ENSG00000113282	CLINT1	ENST00000523908	FSM	754.097	0.47032	0.407349	1.15459	0.248259	0.399042	Not	CLINT1-PB.4151.2-Anno	Annotated	672.811	840.102	42.3031	52.4526	8.95829	46.3291	26.8264	67.7913	61.6106	36.0769	30.2446	72.0158	56.0719	67.854
PB.4151.3	ENSG00000113282	CLINT1	ENST00000411809	FSM	407.883	0.699388	0.452244	1.54649	0.121987	0.232113	Not	CLINT1-PB.4151.3-Anno	Annotated	365.765	458.869	24.7572	29.3741	43.4862	25.7723	44.7204	4.69802	5.10886	26.8466	50.8296	28.5681	21.7135	18.9127
PB.4151.4	ENSG00000113282	CLINT1	ENST00000523908	FSM	471.009	0.0384877	0.211763	0.181749	0.85578	0.910987	Not	CLINT1-PB.4151.4-Anno	Annotated	448.849	508.525	39.6191	42.317	65.1641	46.6326	45.6834	13.9359	26.6794	42.0229	49.4901	72.9035	13.0143	34.1542
PB.4151.5	ENSG00000113282	CLINT1	ENST00000411809	FSM	364.495	1.50636	1.27695	1.17965	0.23814	0.386984	Not	CLINT1-PB.4151.5-Anno	Annotated	251.544	480.247	21.8261	42.0149	0.0250621	28.6407	7.70037	38.887	33.8773	43.3988	23.863	45.7567	41.2038	55.8521
PB.1373.1	ENSG00000130779	CLIP1	ENST00000537178	FSM	2961.1	0.101831	0.137599	0.740057	0.459265	0.61203	Not	CLIP1-PB.1373.1-Anno	Annotated	2780.07	3150.37	104.071	115.224	101.832	119.74	94.6761	100.061	104.045	120.491	104.273	127.807	102.666	120.884
PB.1373.3	ENSG00000130779	CLIP1	novel	NNC	197.474	-0.033936	0.203188	-0.167018	0.867356	0.919787	Not	CLIP1-PB.1373.3-novel	novel	194.257	199.059	13.5047	13.5041	13.0295	19.6525	9.32153	10.9576	14.5622	10.6144	19.5598	13.9814	11.3995	11.9654
PB.1373.4	ENSG00000130779	CLIP1	ENST00000537178	ISM	19.0789	1.08884	1.90548	0.571425	0.567712	0.705022	Not	CLIP1-PB.1373.4-Anno	Annotated	16.0188	22.5987	1.14687	1.60078	0	2.15223	2.32121	0	1.26092	0.573649	1.53842	2.22891	3.66293	0
PB.1373.9	ENSG00000130779	CLIP1	ENST00000537178	ISM	439.394	-0.433655	0.198642	-2.1831	0.0290282	0.0743031	Not	CLIP1-PB.1373.9-Anno	Annotated	489.622	383.796	50.9684	38.7499	72.0061	41.5471	58.3943	43.6266	39.2678	44.0083	37.8515	28.0372	52.0692	31.7834
PB.1373.2	ENSG00000130779	CLIP1	ENST00000537178	ISM	176.3	7.74648	2.10085	3.6873	0.000226645	0.00114235	Up	CLIP1-PB.1373.2-Anno	Annotated	118.648	236.895	6.82882	13.7284	0	26.1387	0	3.32465e-08	8.00543	6.71389	7.34393	19.7719	13.095	21.7174
PB.2523.1	ENSG00000105270	CLIP3	ENST00000360535	FSM	839.839	-1.09229	0.185039	-5.903	3.56954e-09	4.92699e-08	Not	CLIP3-PB.2523.1-Anno	Annotated	1102.4	566.6	74.1978	37.0533	86.5961	55.8766	89.9264	81.4967	57.093	29.0383	39.7606	39.8751	55.9565	20.6362
PB.2649.1	ENSG00000115295	CLIP4	ENST00000320081	FSM	332.307	-1.29238	0.293566	-4.40236	1.0708e-05	7.56749e-05	Not	CLIP4-PB.2649.1-Anno	Annotated	463.629	194.599	27.8296	11.4637	25.4172	36.889	35.6105	24.241	16.9903	12.3547	7.63257	11.3015	14.1007	11.9288
PB.2649.2	ENSG00000115295	CLIP4	ENST00000320081	FSM	134.796	-4.30299	2.13603	-2.01448	0.0439588	0.103449	Not	CLIP4-PB.2649.2-Anno	Annotated	228.619	31.4059	12.195	1.66168	13.8098	9.26924	3.95521	0.0204975	33.9205	2.60442	1.42699e-05	5.91662e-07	2.47396	3.23001
PB.2649.3	ENSG00000115295	CLIP4	ENST00000688337	FSM	260.004	-0.383876	0.222572	-1.72473	0.084577	0.174037	Not	CLIP4-PB.2649.3-Anno	Annotated	284.87	231.044	16.3401	12.9034	22.1369	12.8782	17.2553	12.0628	17.3675	15.9719	12.1501	8.2242	15.3941	12.777
PB.2927.1	ENSG00000013441	CLK1	ENST00000473565	FSM	7162.05	-0.377657	0.144928	-2.60582	0.00916535	0.0282108	Not	CLK1-PB.2927.1-Anno	Annotated	7901	6364.2	549.76	433.679	441.811	537.197	610.502	619.356	539.934	441.293	444.287	426.15	401.171	455.496
PB.1686.1	ENSG00000165959	CLMN	ENST00000298912	ISM	349.771	-0.659299	0.269496	-2.44641	0.0144286	0.0416259	Not	CLMN-PB.1686.1-Anno	Annotated	414.8	278.6	35.2685	22.9344	48.2196	30.6992	40.5476	23.6902	33.1858	20.7277	27.0184	14.7753	28.8083	23.3424
PB.1062.1	ENSG00000166250	CLMP	ENST00000448775	FSM	2774.31	0.035143	0.117568	0.298916	0.765004	0.861901	Not	CLMP-PB.1062.1-Anno	Annotated	2695.83	2885.16	116.126	120.785	103.819	80.2469	151.067	132.146	113.35	108.113	106.013	145.414	118.109	126.278
PB.5220.1	ENSG00000182372	CLN8	ENST00000331222	FSM	299.009	-0.463754	0.253977	-1.82597	0.067855	0.145535	Not	CLN8-PB.5220.1-Anno	Annotated	338.092	257.097	42.3372	31.7543	29.3738	40.8488	45.5203	56.3825	39.5605	40.0992	22.5356	32.7212	35.9407	27.4749
PB.3726.1	ENSG00000134852	CLOCK	ENST00000513440	FSM	1499.39	0.312859	0.139315	2.24569	0.0247236	0.0650833	Not	CLOCK-PB.3726.1-Anno	Annotated	1297.4	1720	48.0575	61.9917	48.5319	52.4384	45.0853	48.3557	45.8762	53.8437	58.0982	75.5983	55.2879	67.1304
PB.2558.1	ENSG00000104853	CLPTM1	novel	NIC	1613.79	0.00555592	0.0955443	0.0581502	0.953629	0.973598	Not	CLPTM1-PB.2558.1-novel	novel	1562.6	1674.2	114.715	119.42	131.082	113.625	115.324	107.925	105.619	133.376	111.879	138.158	119.288	94.3976
PB.28.1	ENSG00000171603	CLSTN1	ENST00000377298	FSM	992.451	-1.95697	0.375887	-5.20626	1.92689e-07	1.96855e-06	Not	CLSTN1-PB.28.1-Anno	Annotated	1545.41	412.118	74.9404	19.2302	140.076	35.364	86.696	59.4154	53.1502	14.9142	14.4856	9.69177	29.7795	27.2799
PB.28.2	ENSG00000171603	CLSTN1	ENST00000361311	FSM	1595.15	0.0828643	0.137172	0.604091	0.545783	0.688584	Not	CLSTN1-PB.28.2-Anno	Annotated	1509.1	1690.4	71.8605	78.4097	86.5123	89.9405	70.5208	56.0911	56.2375	96.4561	75.5974	87.7046	79.4615	52.8291
PB.28.3	ENSG00000171603	CLSTN1	ENST00000377298	FSM	839.77	0.271484	1.34863	0.201303	0.840462	0.90223	Not	CLSTN1-PB.28.3-Anno	Annotated	862.69	819.085	50.5499	47.6987	0.00516139	67.431	72.8336	50.0008	62.4791	46.8319	49.2508	53.9619	49.1497	39.2993
PB.2244.1	ENSG00000141367	CLTC	ENST00000580081	FSM	781.073	0.874908	0.326094	2.68299	0.00729671	0.0232418	Not	CLTC-PB.2244.1-Anno	Annotated	547.876	1039.84	19.3719	35.4855	21.5416	19.2086	15.4838	9.91483	30.7104	25.9438	32.9094	51.5726	40.3962	26.6057
PB.2244.2	ENSG00000141367	CLTC	ENST00000269122	FSM	3804.26	0.741793	0.256309	2.89414	0.00380195	0.0133276	Not	CLTC-PB.2244.2-Anno	Annotated	2913.67	4786.38	102.601	164.703	54.9247	64.8445	158.467	102.829	131.942	158.806	168.612	189.807	169.216	137.073
PB.2244.3	ENSG00000141367	CLTC	ENST00000269122	FSM	4064.17	1.29814	0.171911	7.55127	4.3104e-14	1.10905e-12	Not	CLTC-PB.2244.3-Anno	Annotated	2289.19	5969.56	76.313	194.013	63.2734	71.2034	98.0701	80.8607	68.1572	183.697	161.264	220.038	159.925	245.143
PB.2244.5	ENSG00000141367	CLTC	ENST00000269122	FSM	2196.08	0.754212	0.761121	0.990922	0.321724	0.479617	Not	CLTC-PB.2244.5-Anno	Annotated	1566.46	2982.22	55.7334	100.002	107.406	89.7996	12.9577	23.8107	44.6933	77.6837	40.778	237.955	49.0357	94.5579
PB.2244.6	ENSG00000141367	CLTC	ENST00000580081	ISM	15.1243	0.781098	3.10003	0.251964	0.801069	0.881382	Not	CLTC-PB.2244.6-Anno	Annotated	2.37333e-08	29.9833	9.44336e-10	1.2194	0	4.72168e-09	0	0	0	0	0	2.72051e-08	0	6.09701
PB.2244.7	ENSG00000141367	CLTC	ENST00000580081	ISM	90.8442	0.0283551	1.75269	0.0161781	0.987092	0.991517	Not	CLTC-PB.2244.7-Anno	Annotated	64.4432	113.516	4.3856	7.99177	5.09482e-07	10.8061	7.94413e-06	0.291543	10.8304	28.9162	10.4598	0.408871	2.35191e-07	0.173958
PB.2244.8	ENSG00000141367	CLTC	ENST00000580081	ISM	12.4302	0.0807875	2.13954	0.0377592	0.96988	0.984764	Not	CLTC-PB.2244.8-Anno	Annotated	18.8004	4.87882	1.44599	0.383213	0.209591	0.00372838	1.18484e-06	5.51257	1.50405	0.538943	0.0517007	0.000285998	0.000325712	1.32481
PB.2244.9	ENSG00000141367	CLTC	ENST00000580081	ISM	327.266	1.63871	1.11168	1.47409	0.140458	0.258755	Not	CLTC-PB.2244.9-Anno	Annotated	148.125	527.934	13.0415	44.298	13.351	11.3207	28.9402	11.507	0.0885117	16.9386	16.9274	65.1549	36.2694	86.1993
PB.1905.1	ENSG00000103351	CLUAP1	ENST00000576634	FSM	309.854	-0.291123	0.145016	-2.00752	0.0446942	0.104825	Not	CLUAP1-PB.1905.1-Anno	Annotated	332.428	286.163	29.6698	24.9467	28.6389	25.638	36.6366	30.6675	26.7681	26.9358	23.3296	23.2	29.4573	21.8108
PB.1126.1	ENSG00000111726	CMAS	novel	NIC	328.87	-0.225899	0.18226	-1.23944	0.215184	0.358399	Not	CMAS-PB.1126.1-novel	novel	347.514	309.292	21.1446	18.2153	28.135	15.7721	26.4407	16.7024	18.673	21.3326	18.652	15.4071	18.5986	17.0859
PB.3902.2	ENSG00000164237	CMBL	ENST00000296658	FSM	138.014	-2.08747	0.621233	-3.36021	0.000778834	0.00339433	Down	CMBL-PB.3902.2-Anno	Annotated	208.313	64.1602	32.369	9.58596	48.0131	16.1344	40.6314	26.56	30.506	7.50941	14.5011	7.49805	17.2501	1.17113
PB.3902.1	ENSG00000164237	CMBL	ENST00000296658	FSM	584.898	-0.531679	0.115768	-4.59263	4.37701e-06	3.33046e-05	Not	CMBL-PB.3902.1-Anno	Annotated	670.97	492.121	91.8465	65.1365	115.821	69.7663	99.6428	85.6642	88.3386	72.7931	55.0932	57.3434	64.3809	76.0719
PB.2946.1	ENSG00000183671	CMKLR2	ENST00000442134	FSM	7.96051	1.58896	2.99884	0.529859	0.59621	0.727665	Not	GPR1-PB.2946.1-Anno	Annotated	4.04481	13.1838	0.530567	1.45106	2.65083	0	0	0.00200491	0	0	2.00332	5.25198	0	0
PB.2946.2	ENSG00000183671	CMKLR2	ENST00000621141	FSM	205.199	-0.245911	0.188275	-1.30613	0.191508	0.327484	Not	GPR1-PB.2946.2-Anno	Annotated	214.7	193.556	26.8135	23.4625	33.4016	26.328	27.0782	22.784	24.4758	27.202	18.6245	19.2193	23.2421	29.0248
PB.2946.3	ENSG00000183671	CMKLR2	novel	NIC	60.5663	-0.0965492	0.326389	-0.29581	0.767375	0.862074	Not	GPR1-PB.2946.3-novel	novel	60.7112	59.6423	9.11083	8.6293	14.3751	10.3788	7.27215	5.62985	7.8982	10.2208	11.6235	5.86648	9.01824	6.41746
PB.143.1	ENSG00000162368	CMPK1	ENST00000371873	FSM	2407.87	0.173206	0.0976589	1.77358	0.0761326	0.159787	Not	CMPK1-PB.143.1-Anno	Annotated	2205	2632	170.654	198.505	151.98	171.582	187.977	173.512	168.221	190.917	191.917	226.718	183.638	199.336
PB.3350.1	ENSG00000091317	CMTM6	ENST00000205636	FSM	1798.62	0.321653	0.157835	2.03791	0.0415585	0.0990757	Not	CMTM6-PB.3350.1-Anno	Annotated	1552.52	2069	106.044	137.309	117.282	105.655	94.7601	117.265	95.2598	132.099	115.396	171.322	128.231	139.498
PB.3350.2	ENSG00000091317	CMTM6	ENST00000205636	FSM	0.316325	-0.866772	3.1292	-0.276995	0.781784	0.871199	Not	CMTM6-PB.3350.2-Anno	Annotated	0.679299	0.00169771	0.0805483	0.000203465	0	0	0	0.402742	0	0	0.00101733	0	0	0
PB.3348.1	ENSG00000153551	CMTM7	novel	NIC	95.729	-0.467599	0.256634	-1.82205	0.0684477	0.14658	Not	CMTM7-PB.3348.1-novel	novel	108.381	82.5848	13.2921	9.84926	13.837	11.0585	16.6555	13.524	11.3853	10.1745	9.53611	8.31085	10.3683	10.8565
PB.4239.1	ENSG00000137200	CMTR1	ENST00000373451	FSM	576.265	-0.189366	0.134402	-1.40896	0.158848	0.284999	Not	CMTR1-PB.4239.1-Anno	Annotated	601.2	552.6	33.3296	29.7079	38.8459	31.1194	42.7726	25.8662	28.0436	29.5259	30.8744	29.8013	32.6949	25.6432
PB.2031.3	ENSG00000180917	CMTR2	ENST00000434935	FSM	121.268	-5.23062	1.24114	-4.21436	2.50489e-05	0.000160678	Down	CMTR2-PB.2031.3-Anno	Annotated	191.582	52.8869	11.0869	2.81331	18.3345	2.38425	17.3443	10.6208	6.75067	0.197467	0.00700569	7.37426	5.29976e-05	6.48775
PB.2031.1	ENSG00000180917	CMTR2	novel	NIC	193.704	0.802956	0.316623	2.536	0.0112126	0.033575	Not	CMTR2-PB.2031.1-novel	novel	138.148	248.35	8.03907	14.1422	7.3584	5.80049	8.87503	5.20775	12.9537	16.1923	15.9303	7.85793	14.4322	16.2985
PB.2031.2	ENSG00000180917	CMTR2	ENST00000434935	FSM	85.4476	3.8808	1.30462	2.97467	0.00293304	0.010668	Up	CMTR2-PB.2031.2-Anno	Annotated	64.0698	105.963	3.4604	5.8303	2.26253	14.9732	0.0662621	0	0	7.24834	6.61261	5.31785	9.81467	0.158033
PB.2402.2	ENSG00000133313	CNDP2	ENST00000324262	FSM	56.1525	-7.98849	1.38348	-5.77419	7.73232e-09	1.01895e-07	Down	CNDP2-PB.2402.2-Anno	Annotated	110.685	1.04907	10.6627	0.103335	2.79803	12.4365	24.4058	6.46842	7.20484	7.32308e-07	4.88177e-06	3.86871e-05	0.515368	0.00126369
PB.2402.1	ENSG00000133313	CNDP2	ENST00000579847	FSM	267.377	0.945541	0.323421	2.92356	0.00346054	0.0123209	Not	CNDP2-PB.2402.1-Anno	Annotated	189.851	349.681	16.0625	28.966	6.90789	10.7605	25.8166	14.4407	22.3866	25.6032	32.3406	25.8523	29.4111	31.6225
PB.2402.3	ENSG00000133313	CNDP2	ENST00000324262	FSM	433.894	0.770298	0.165699	4.64879	3.33892e-06	2.60623e-05	Not	CNDP2-PB.2402.3-Anno	Annotated	314.461	563.955	27.1386	46.8992	41.2115	24.3896	23.7764	27.713	18.6026	54.1006	40.5753	58.428	45.5683	35.8239
PB.1597.1	ENSG00000100528	CNIH1	ENST00000216416	FSM	1666.42	0.466431	0.098776	4.72211	2.33412e-06	1.91895e-05	Not	CNIH1-PB.1597.1-Anno	Annotated	1359.8	2005.8	63.3973	90.7402	66.7704	55.499	67.691	64.6085	62.4177	84.3362	87.5669	113.173	87.9166	80.7089
PB.505.1	ENSG00000143771	CNIH4	ENST00000465271	FSM	1010.3	0.00978709	0.102432	0.0955473	0.92388	0.954946	Not	CNIH4-PB.505.1-Anno	Annotated	984.14	1040.52	53.8488	55.2156	64.9312	44.7452	65.7662	46.2437	47.5574	60.4568	49.5885	54.0587	55.5534	56.4204
PB.4404.1	ENSG00000153721	CNKSR3	ENST00000607772	FSM	906.106	-0.0923456	0.282539	-0.326842	0.743788	0.849711	Not	CNKSR3-PB.4404.1-Anno	Annotated	910.8	901.8	63.3946	60.5214	87.4985	68.4671	37.1069	55.1566	68.7439	41.3514	57.708	79.5514	62.9713	61.0249
PB.1999.1	ENSG00000125107	CNOT1	ENST00000317147	FSM	5293.33	-0.0245302	0.167679	-0.146293	0.88369	0.928413	Not	CNOT1-PB.1999.1-Anno	Annotated	5178.27	5469.38	145.927	150.024	138.995	166.078	145.561	144.131	134.868	142.196	122.293	206.304	135.608	143.717
PB.1999.3	ENSG00000125107	CNOT1	ENST00000441024	FSM	639.63	0.208829	0.128088	1.63036	0.103026	0.203157	Not	CNOT1-PB.1999.3-Anno	Annotated	577.155	699.392	25.3375	30.0232	27.0645	26.6647	18.9948	26.0454	27.9181	31.4065	29.6995	28.2241	27.0522	33.7336
PB.1999.2	ENSG00000125107	CNOT1	ENST00000569240	ISM	91.6375	6.27605	1.3548	4.63246	3.61355e-06	2.78926e-05	Up	CNOT1-PB.1999.2-Anno	Annotated	50.1707	133.025	4.83525	11.4993	23.1514	1.02484	0	0	0	18.1473	17.115	5.42522	7.42503	9.38415
PB.3349.1	ENSG00000182973	CNOT10	ENST00000331889	ISM	151.846	0.168155	0.193824	0.867563	0.385634	0.543297	Not	CNOT10-PB.3349.1-Anno	Annotated	140	165.2	17.3879	19.9325	15.7881	14.099	23.4558	16.319	17.2774	19.6594	20.1727	20.8277	21.6597	17.3429
PB.1251.1	ENSG00000111596	CNOT2	ENST00000229195	FSM	115.418	0.321087	1.05571	0.304144	0.761018	0.860271	Not	CNOT2-PB.1251.1-Anno	Annotated	112.521	115.373	10.7364	11.1672	6.1426	13.4168	0	21.5237	12.5988	17.2946	6.80646	10.2781	18.7082	2.74838
PB.1251.2	ENSG00000111596	CNOT2	ENST00000229195	FSM	221.18	-1.47032	0.725924	-2.02544	0.0428218	0.101392	Not	CNOT2-PB.1251.2-Anno	Annotated	295.364	143.648	31.7202	14.4356	52.3395	24.3875	29.0915	14.4926	38.2898	0.67256	27.3406	18.7566	5.62736	19.7811
PB.1251.4	ENSG00000111596	CNOT2	ENST00000229195	FSM	295.726	0.478465	0.424062	1.12829	0.259197	0.412235	Not	CNOT2-PB.1251.4-Anno	Annotated	254.324	341.202	32.9118	43.631	8.67605	44.175	41.491	31.1673	39.0496	51.3895	46.2657	49.3187	34.2897	36.8913
PB.4669.1	ENSG00000080802	CNOT4	ENST00000361528	FSM	464.659	-0.314014	0.210762	-1.4899	0.13625	0.252475	Not	CNOT4-PB.4669.1-Anno	Annotated	502.068	429.503	33.7597	28.1574	30.6474	45.6313	34.556	27.7825	30.1816	29.0413	23.7384	39.0451	28.0006	20.9618
PB.4669.2	ENSG00000080802	CNOT4	ENST00000541284	FSM	355.251	-0.225202	0.165233	-1.36293	0.172905	0.303632	Not	CNOT4-PB.4669.2-Anno	Annotated	372.977	333.523	23.3217	20.5476	19.5711	31.5031	22.9874	22.3514	20.1953	22.64	23.2556	17.9553	23.1679	15.7194
PB.4669.3	ENSG00000080802	CNOT4	ENST00000315544	FSM	656.138	-0.994308	0.100135	-9.92964	3.09381e-23	1.8276e-21	Not	CNOT4-PB.4669.3-Anno	Annotated	846.955	451.374	39.83	20.6941	40.8661	36.463	38.5952	41.8936	41.3323	16.5862	22.4797	20.3256	22.5702	21.5089
PB.3759.1	ENSG00000138767	CNOT6L	ENST00000512485	FSM	1760.68	-0.285328	0.156106	-1.82778	0.0675828	0.145126	Not	CNOT6L-PB.3759.1-Anno	Annotated	1880.2	1637	93.6193	79.2843	103.461	105.929	80.2519	92.9841	85.4706	77.326	72.3342	96.7158	71.461	78.5846
PB.4739.1	ENSG00000198791	CNOT7	ENST00000523917	FSM	354.854	0.411513	0.148109	2.77845	0.00546185	0.0180942	Not	CNOT7-PB.4739.1-Anno	Annotated	298.516	418.356	23.4084	31.594	28.0184	15.5222	27.8505	19.7489	25.9021	28.7695	27.7041	39.0736	32.3205	30.1022
PB.4739.2	ENSG00000198791	CNOT7	ENST00000361272	FSM	425.653	0.355417	0.172987	2.05459	0.0399182	0.0959556	Not	CNOT7-PB.4739.2-Anno	Annotated	362.921	496.945	67.0638	89.0863	58.6227	77.2491	73.0218	57.4389	68.9863	92.881	75.1382	117.619	74.9634	84.8301
PB.4739.3	ENSG00000198791	CNOT7	ENST00000523917	ISM	71.5164	-0.0525854	0.356582	-0.147471	0.88276	0.928355	Not	CNOT7-PB.4739.3-Anno	Annotated	71.73	71.1125	7.26942	6.93783	10.8478	5.77953	8.49084	3.51339	7.71559	8.51216	4.94742	5.45224	7.20246	8.57486
PB.2961.1	ENSG00000144580	CNOT9	ENST00000273064	FSM	1197.5	0.475946	0.135338	3.51672	0.000436906	0.00203704	Not	CNOT9-PB.2961.1-Anno	Annotated	973.001	1440.71	68.9093	99.2121	75.6319	74.5993	63.1559	67.2341	63.9254	102.039	86.8271	119.382	93.2216	94.5901
PB.553.2	ENSG00000162852	CNST	novel	NIC	141.652	-0.102688	0.307983	-0.333423	0.738815	0.84574	Not	CNST-PB.553.2-novel	novel	142.124	140.09	20.5395	19.4684	31.5126	16.2589	17.8659	15.0029	22.0574	18.2341	22.3679	17.2606	25.7557	13.7239
PB.2275.1	ENSG00000166685	COG1	ENST00000299886	FSM	611.76	-0.235353	0.118117	-1.99254	0.0463114	0.107919	Not	COG1-PB.2275.1-Anno	Annotated	646.878	579.303	48.4039	41.9609	51.6501	41.3285	61.7609	38.3326	48.9472	39.0015	42.0606	47.0736	44.4962	37.1728
PB.2275.2	ENSG00000166685	COG1	novel	NIC	87.0188	-0.813841	0.654755	-1.24297	0.213879	0.356824	Not	COG1-PB.2275.2-novel	novel	101.922	71.6972	7.43899	5.21029	3.26324	5.48002	9.02108	12.8504	6.58015	11.5719	1.53271	6.09399	2.52409	4.32873
PB.524.1	ENSG00000135775	COG2	ENST00000366669	FSM	323.6	0.140977	0.141211	0.998348	0.318111	0.476583	Not	COG2-PB.524.1-Anno	Annotated	302.2	348.8	23.6177	26.4187	24.8923	18.5176	32.6585	21.6271	20.3929	28.3768	23.6603	28.1786	25.2312	26.6468
PB.1458.1	ENSG00000136152	COG3	ENST00000349995	FSM	1002.65	0.263136	0.0741499	3.54871	0.000387125	0.00182329	Not	COG3-PB.1458.1-Anno	Annotated	888.6	1133.2	43.8946	54.2096	47.2802	44.5729	52.2788	35.9666	39.3746	53.9254	52.7207	65.8691	45.488	53.0446
PB.2029.1	ENSG00000103051	COG4	novel	NIC	96.3483	0.553743	0.608381	0.91019	0.362722	0.520626	Not	COG4-PB.2029.1-novel	novel	81.6733	110.323	5.17929	6.7641	6.59007	1.66142	6.80041	1.56934	9.27519	5.69499	6.5044	3.26032	10.4034	7.95735
PB.2029.2	ENSG00000103051	COG4	ENST00000323786	FSM	302.087	0.274754	0.129154	2.12734	0.033392	0.083145	Not	COG4-PB.2029.2-Anno	Annotated	266.927	342.677	21.516	26.717	23.4954	22.108	26.2149	19.5681	16.1935	24.9372	26.7154	33.2364	23.943	24.7529
PB.4612.1	ENSG00000164597	COG5	ENST00000297135	FSM	1112.1	0.282277	0.157713	1.78982	0.0734828	0.155731	Not	COG5-PB.4612.1-Anno	Annotated	971.203	1270.88	62.4373	79.1215	65.9175	56.0161	57.5803	63.5627	69.1101	66.036	79.4721	104.7	72.5057	72.8942
PB.4612.3	ENSG00000164597	COG5	ENST00000297135	FSM	25.9118	0.811774	3.03882	0.267135	0.789366	0.875574	Not	COG5-PB.4612.3-Anno	Annotated	44.2122	9.70187	3.18303	0.697134	0	1.15866e-07	15.9152	0	0	3.44917	0	0	0.0364669	3.50341e-05
PB.4612.4	ENSG00000164597	COG5	ENST00000297135	FSM	19.1051	-0.387686	2.99553	-0.129421	0.897024	0.937651	Not	COG5-PB.4612.4-Anno	Annotated	19.5847	20.8217	1.47603	1.45396	0	0.125283	7.25485	0	0	0.000262852	0	3.001	0.000577818	4.26798
PB.1441.1	ENSG00000133103	COG6	ENST00000455146	FSM	83.9973	1.57282	0.399489	3.93709	8.24768e-05	0.00046926	Not	COG6-PB.1441.1-Anno	Annotated	44.9453	126.908	2.81635	7.68804	1.38764	1.21236	5.20642	1.21557	5.05975	9.14395	3.69025	9.28748	3.90116	12.4174
PB.1441.2	ENSG00000133103	COG6	ENST00000455146	FSM	658.893	0.289941	0.123051	2.35628	0.0184592	0.0512738	Not	COG6-PB.1441.2-Anno	Annotated	576.055	752.492	37.9621	47.9174	44.8139	33.4829	40.6603	37.1871	33.6662	41.4064	46.2425	59.8466	46.3218	45.7697
PB.1945.1	ENSG00000168434	COG7	ENST00000307149	FSM	126.26	-0.279489	0.447729	-0.624237	0.532472	0.676621	Not	COG7-PB.1945.1-Anno	Annotated	137.283	116.094	11.3911	9.06941	26.7791	7.76637	8.56078	5.18188	8.66753	11.134	2.61787	12.4036	8.47171	10.7199
PB.1945.2	ENSG00000168434	COG7	ENST00000307149	FSM	273.337	0.545618	0.418701	1.30312	0.192533	0.329035	Not	COG7-PB.1945.2-Anno	Annotated	229.133	320.447	18.6986	25.8414	5.32786	17.4132	26.6786	22.1244	21.9492	29.6111	29.5128	25.4268	23.211	21.445
PB.2025.1	ENSG00000213380	COG8	ENST00000562081	ISM	725.453	-0.253324	0.115997	-2.18389	0.0289707	0.0742106	Not	COG8-PB.2025.1-Anno	Annotated	767.332	678.901	63.0343	54.0595	80.944	52.7367	69.9081	52.6937	58.889	61.5201	48.6153	46.5823	54.5019	59.0776
PB.2235.1	ENSG00000121058	COIL	ENST00000240316	FSM	307.361	0.0885801	0.169484	0.522645	0.601221	0.731212	Not	COIL-PB.2235.1-Anno	Annotated	293.6	322.8	25.6012	27.2228	28.4975	22.5719	31.926	14.532	30.4786	30.5912	25.1529	26.7807	24.3742	29.215
PB.4350.1	ENSG00000123500	COL10A1	novel	NIC	216.439	2.7628	0.231625	11.9279	8.46667e-33	1.06942e-30	Up	COL10A1-PB.4350.1-novel	novel	54	386.2	4.87604	33.8136	5.62824	3.22967	5.03726	3.5703	6.91472	47.1898	33.7775	28.0669	24.3273	35.7068
PB.85.1	ENSG00000084636	COL16A1	ENST00000373672	FSM	4015.36	-0.284858	0.101311	-2.81172	0.00492777	0.0165858	Not	COL16A1-PB.85.1-Anno	Annotated	4312.8	3710.8	183.801	153.182	215.433	124.669	211.606	163.466	203.83	156.479	134.764	154.172	141.749	178.745
PB.2225.14	ENSG00000108821	COL1A1	ENST00000225964	ISM	1097.77	-8.89825	2.1427	-4.15282	3.28406e-05	0.000204981	Down	COL1A1-PB.2225.14-Anno	Annotated	1291.74	1036.23	85.8486	58.37	357.016	3.44881	41.2776	21.0972	6.40349	0.000322605	0.0424017	291.8	4.63321e-06	0.00708004
PB.2225.4	ENSG00000108821	COL1A1	ENST00000225964	ISM	96.4032	-7.68367	1.78267	-4.31021	1.63099e-05	0.000109898	Down	COL1A1-PB.2225.4-Anno	Annotated	157.757	32.7341	10.3973	1.99874	10.9546	0.0519132	2.53298	30.9947	7.45252	0.000499709	0.00530128	9.98786	3.01931e-05	7.35691e-09
PB.2225.1	ENSG00000108821	COL1A1	ENST00000225964	FSM	214407	1.01743	0.134356	7.57264	3.65706e-14	9.55098e-13	Not	COL1A1-PB.2225.1-Anno	Annotated	139294	295062	6423.46	13200.3	6308.92	5469.62	7030.89	4805.62	8502.25	13508.6	13677	15040.8	11266.9	12508
PB.2225.2	ENSG00000108821	COL1A1	novel	NIC	13720.2	0.400768	0.203447	1.96989	0.0488512	0.112448	Not	COL1A1-PB.2225.2-novel	novel	11964.6	15646.7	551.656	693.997	836.99	234.933	708.895	382.148	595.316	908.695	529.006	663.312	713.741	655.229
PB.2902.1	ENSG00000168542	COL3A1	ENST00000304636	FSM	161060	1.11884	0.131352	8.5179	1.62469e-17	5.72929e-16	Not	COL3A1-PB.2902.1-Anno	Annotated	99697.2	228396	3983.49	8822.91	3339.7	3124.08	5822.18	3362.59	4268.87	7025.94	9924.17	11061.5	7035.98	9066.95
PB.2902.2	ENSG00000168542	COL3A1	ENST00000304636	FSM	66800.3	1.13606	0.155738	7.29468	2.9936e-13	6.90914e-12	Not	COL3A1-PB.2902.2-Anno	Annotated	41531.6	94823.9	1917.48	4220.26	2054	1863.89	2716.93	928.037	2024.54	4820.21	3096.21	5527.67	3116.27	4540.95
PB.2902.3	ENSG00000168542	COL3A1	novel	NIC	4360.46	0.487608	0.19782	2.4649	0.013705	0.0399365	Not	COL3A1-PB.2902.3-novel	novel	3565.2	5236.76	180.322	255.134	232.44	114.576	223.52	180.071	151.003	186.634	244.192	288.465	281.292	275.087
PB.2904.1	ENSG00000204262	COL5A2	ENST00000374866	ISM	2086.97	1.81545	0.115232	15.7548	6.36763e-56	3.68633e-53	Not	COL5A2-PB.2904.1-Anno	Annotated	886.8	3402	121.434	447.996	131.965	103.537	143.566	106.261	121.844	409.415	348.493	618.986	355.581	507.507
PB.3182.3	ENSG00000142173	COL6A2	ENST00000397763	FSM	4124.92	-2.95629	0.303421	-9.74317	1.97297e-22	1.05432e-20	Down	COL6A2-PB.3182.3-Anno	Annotated	6940.53	1116.54	498.454	78.8344	576.048	332.76	459.397	698.59	425.474	27.4188	56.829	65.7266	191.662	52.5359
PB.3182.2	ENSG00000142173	COL6A2	ENST00000300527	FSM	51076	-0.00893515	0.166185	-0.0537664	0.957121	0.97566	Not	COL6A2-PB.3182.2-Anno	Annotated	49778.7	52564.3	3269.92	3342.68	3950.18	2596.31	3833.2	3402.1	2567.79	2772.6	4149.18	3404	3700.37	2687.23
PB.3182.5	ENSG00000142173	COL6A2	ENST00000300527	ISM	619.811	9.30842	2.98111	3.12247	0.00179342	0.00696418	Up	COL6A2-PB.3182.5-Anno	Annotated	0.000538097	1325.1	4.08388e-05	96.0381	0	1.30596e-07	0	1.779e-08	0.000204046	5.93437	1.01358	206.89	0.00700398	266.346
PB.3000.1	ENSG00000163359	COL6A3	novel	NIC	2642.13	0.97998	0.18186	5.38865	7.0987e-08	7.85266e-07	Not	COL6A3-PB.3000.1-novel	novel	1745.72	3597.35	100.33	199.941	110.57	59.4876	120.367	98.9639	112.26	157.76	209.997	209.657	207.773	214.518
PB.3460.3	ENSG00000144810	COL8A1	novel	NNC	122.086	2.36238	0.526466	4.48725	7.21491e-06	5.26492e-05	Up	COL8A1-PB.3460.3-novel	novel	45.1029	205.89	4.03495	18.0748	0.690157	4.59362	2.65043	2.9701	9.27045	14.3681	14.6817	25.9765	8.92599	26.4216
PB.3460.1	ENSG00000144810	COL8A1	ENST00000621757	FSM	44.3312	1.11574	0.990589	1.12634	0.26002	0.412976	Not	COL8A1-PB.3460.1-Anno	Annotated	32.9986	56.1213	2.90349	4.71341	6.09233	2.91626	0	1.31465	4.19423	5.57415	2.4387	4.85507	3.43649	7.26264
PB.3460.2	ENSG00000144810	COL8A1	ENST00000261037	FSM	79.3258	1.80484	0.987442	1.82779	0.0675804	0.145126	Not	COL8A1-PB.3460.2-Anno	Annotated	41.8985	120.588	3.72217	10.5254	0	2.0744	5.40029	3.98817	7.14801	13.6803	10.8729	15.2469	5.55427	7.27271
PB.2312.1	ENSG00000158270	COLEC12	ENST00000400256	FSM	2232.43	-0.115911	0.151044	-0.767403	0.442842	0.596784	Not	COLEC12-PB.2312.1-Anno	Annotated	2234.8	2305.2	163.682	161.701	143.192	94.4978	233.886	156.049	190.783	94.1021	110.552	292.419	143.653	167.779
PB.2488.1	ENSG00000130309	COLGALT1	ENST00000252599	FSM	2366.4	0.995399	0.106037	9.38729	6.15628e-21	3.01181e-19	Not	COLGALT1-PB.2488.1-Anno	Annotated	1534.1	3284.98	94.7337	195.818	107.125	84.8007	113.971	84.8661	82.9067	197.408	168.058	256.994	156.757	199.875
PB.4059.1	ENSG00000145781	COMMD10	ENST00000274458	FSM	871.456	0.029051	0.106658	0.272375	0.785334	0.872603	Not	COMMD10-PB.4059.1-Anno	Annotated	842.942	903.113	50.1695	52.1804	57.316	37.7201	60.7881	46.0913	48.932	54.9919	48.9774	51.0798	55.6019	50.2511
PB.3569.1	ENSG00000114744	COMMD2	ENST00000473414	FSM	416.65	0.191568	0.0974459	1.96589	0.0493117	0.113283	Not	COMMD2-PB.3569.1-Anno	Annotated	378.428	459.583	84.7564	98.9461	99.0916	64.4761	102.335	75.6841	82.1948	110.016	85.918	107.928	90.1936	100.675
PB.408.1	ENSG00000143207	COP1	novel	NIC	269.569	0.168267	0.191914	0.876781	0.380606	0.538644	Not	RFWD2-PB.408.1-novel	novel	248.071	291.685	20.3632	23.3512	21.7839	26.1332	15.5628	19.5853	18.7506	23.6467	23.79	26.4475	21.5301	21.3418
PB.408.2	ENSG00000143207	COP1	ENST00000367669	FSM	783.567	0.199364	0.120371	1.65625	0.097672	0.195091	Not	RFWD2-PB.408.2-Anno	Annotated	713.129	861.115	56.9799	67.0636	45.2888	53.3936	72.5442	54.8549	58.8179	61.5864	62.5064	71.2114	61.7606	78.253
PB.368.2	ENSG00000122218	COPA	ENST00000241704	FSM	1985.92	0.248354	0.18436	1.34711	0.177944	0.310767	Not	COPA-PB.368.2-Anno	Annotated	1755.04	2252.08	80.9375	100.089	96.7818	64.1041	77.6683	82.0196	84.1135	83.977	103.765	134.777	78.5318	99.3935
PB.368.5	ENSG00000122218	COPA	ENST00000241704	FSM	2002.53	1.40478	0.854101	1.64475	0.100022	0.198586	Not	COPA-PB.368.5-Anno	Annotated	1242.27	2829.63	57.6825	130.489	2.06793	73.4039	74.312	81.0016	57.6269	149.772	145.575	167.695	86.1649	103.237
PB.368.6	ENSG00000122218	COPA	ENST00000241704	FSM	739.247	-0.424875	1.00129	-0.424327	0.671327	0.790328	Not	COPA-PB.368.6-Anno	Annotated	783.583	686.514	38.8422	32.5426	85.4381	19.3384	55.395	1.76342	32.2762	19.8367	11.081	9.42621	72.6814	49.6878
PB.368.1	ENSG00000122218	COPA	ENST00000241704	FSM	16.0572	5.08307	1.64557	3.08894	0.00200869	0.00769259	Up	COPA-PB.368.1-Anno	Annotated	2.50712	30.1154	0.110094	1.36605	0.000806572	0.12884	7.83728e-05	0.40239	0.0183576	2.04773	0.671604	0.558421	0.624131	2.92837
PB.368.3	ENSG00000122218	COPA	ENST00000241704	FSM	409.001	5.72746	1.65266	3.4656	0.000529053	0.00241481	Up	COPA-PB.368.3-Anno	Annotated	84.4615	733.492	3.7257	33.5823	0.00902543	7.28485	0.00142118	10.1751	1.15813	48.9551	13.2027	13.1471	35.0646	57.5418
PB.368.8	ENSG00000122218	COPA	ENST00000241704	FSM	180.189	11.4251	3.02448	3.77756	0.000158375	0.000834467	Up	COPA-PB.368.8-Anno	Annotated	18.5847	399.221	0.941403	19.5063	0.0255789	4.68142	0	0	1.53823e-05	5.912e-06	0.00652256	92.5729	0.252784	4.6994
PB.869.1	ENSG00000129083	COPB1	novel	NIC	647.727	0.973779	0.272929	3.56788	0.000359881	0.00171005	Not	COPB1-PB.869.1-novel	novel	447.332	864.178	30.1844	56.3564	35.0109	31.2525	33.8656	9.72393	41.0692	67.7995	42.7487	63.0926	49.3857	58.7555
PB.869.2	ENSG00000129083	COPB1	novel	NIC	51.0594	3.11668	2.25947	1.37938	0.167777	0.297174	Not	COPB1-PB.869.2-novel	novel	20.0683	90.6093	1.24462	5.50974	0.710495	5.38833	0.00862383	4.71416e-05	0.11562	6.62131	0.000412581	18.5963	2.32973	0.000935871
PB.869.3	ENSG00000129083	COPB1	ENST00000439561	FSM	541.533	0.713929	0.448891	1.59043	0.111738	0.216284	Not	COPB1-PB.869.3-Anno	Annotated	416.489	665.202	27.1782	43.3832	16.7513	39.523	26.0618	43.2564	10.2982	46.9488	21.6071	33.1036	54.9875	60.269
PB.869.4	ENSG00000129083	COPB1	ENST00000439561	FSM	1153.79	1.18426	0.385903	3.0688	0.00214919	0.00815869	Not	COPB1-PB.869.4-Anno	Annotated	721.845	1654.74	49.4243	107.498	63.6633	56.8145	52.0446	9.94424	64.6547	58.1219	85.1432	194.344	78.7219	121.157
PB.869.5	ENSG00000129083	COPB1	novel	NIC	174.73	0.391018	0.567215	0.689365	0.490594	0.63859	Not	COPB1-PB.869.5-novel	novel	144.384	206.207	9.34269	13.0631	1.95018	12.1358	15.9176	6.38415	10.3257	11.002	22.4051	10.0753	2.38028	19.453
PB.869.7	ENSG00000129083	COPB1	novel	NIC	28.1256	-0.215028	2.98168	-0.0721165	0.942509	0.966723	Not	COPB1-PB.869.7-novel	novel	50.6467	3.12313	3.26228	0.196016	0.00350896	0.0132666	0.00479429	16.0472	0.242667	0.115805	5.23934e-05	0.860206	3.00893e-05	0.00398426
PB.3555.2	ENSG00000184432	COPB2	ENST00000333188	FSM	1754.05	0.802621	0.157249	5.10414	3.32298e-07	3.15365e-06	Not	COPB2-PB.3555.2-Anno	Annotated	1240	2308.25	90.3734	163.38	99.1596	100.784	80.517	89.1081	82.2979	136.53	145.265	199.479	161.933	173.691
PB.3555.3	ENSG00000184432	COPB2	ENST00000512309	FSM	286.752	2.27751	1.20622	1.88813	0.0590078	0.131051	Not	COPB2-PB.3555.3-Anno	Annotated	133.268	458.871	10.9266	36.6339	0	8.48994	25.3322	3.03578	17.775	50.9506	31.0125	53.2089	20.194	27.8036
PB.3555.4	ENSG00000184432	COPB2	ENST00000504295	FSM	975.842	0.0103468	0.105801	0.0977953	0.922095	0.953527	Not	COPB2-PB.3555.4-Anno	Annotated	950.256	1001.53	60.1862	61.3411	84.2163	44.8113	65.419	49.6168	56.8676	70.7488	52.6622	56.0838	62.5064	64.704
PB.3555.1	ENSG00000184432	COPB2	ENST00000333188	FSM	212.664	3.99287	1.54583	2.583	0.00979454	0.0298564	Up	COPB2-PB.3555.1-Anno	Annotated	76.7782	365.582	5.37048	24.3878	0	5.69357e-06	17.0363	2.42631	7.38979	14.7007	24.3774	37.2043	10.2533	35.4033
PB.4653.1	ENSG00000158623	COPG2	ENST00000425248	FSM	417.94	-0.249512	0.209312	-1.19206	0.233239	0.380627	Not	COPG2-PB.4653.1-Anno	Annotated	443.432	393.008	32.0236	27.5634	29.3169	31.9779	47.2183	26.1774	25.4274	18.4539	33.6604	25.5044	30.798	29.4002
PB.4653.2	ENSG00000158623	COPG2	ENST00000425248	FSM	140.746	1.22167	1.02288	1.19434	0.232344	0.379877	Not	COPG2-PB.4653.2-Anno	Annotated	97.9683	186.992	7.70806	14.4259	7.96795	3.43704	8.92789e-05	15.7482	11.387	21.32	7.76697	22.1495	8.58282	12.3103
PB.2999.1	ENSG00000198612	COPS8	novel	NIC	368.935	-0.132518	0.159003	-0.833426	0.404605	0.562608	Not	COPS8-PB.2999.1-novel	novel	376.437	360.861	42.8814	39.6476	57.4831	30.8218	43.4425	42.039	40.6204	37.007	40.0383	39.4487	42.5865	39.1574
PB.3770.1	ENSG00000173085	COQ2	ENST00000647002	ISM	374.116	0.12626	0.120146	1.05089	0.293309	0.449508	Not	COQ2-PB.3770.1-Anno	Annotated	347.497	401.378	36.2096	40.7269	40.2411	29.9555	40.2842	37.4233	33.1438	47.854	35.975	36.7455	43.003	40.057
PB.1928.1	ENSG00000167186	COQ7	ENST00000321998	FSM	254.591	-0.0986851	0.176562	-0.558927	0.576212	0.711887	Not	COQ7-PB.1928.1-Anno	Annotated	259.909	251.664	22.9911	21.5969	20.7505	19.4396	35.1397	19.4768	20.1489	22.713	21.314	23.2042	20.1567	20.5968
PB.516.1	ENSG00000163050	COQ8A	ENST00000366777	FSM	414.58	-0.651298	0.159921	-4.07262	4.64877e-05	0.000279327	Not	COQ8A-PB.516.1-Anno	Annotated	490.6	334.4	38.8668	25.7616	42.7689	39.6521	41.5799	32.0217	38.3113	26.1724	28.5879	27.0425	29.4925	17.5126
PB.1327.1	ENSG00000110880	CORO1C	ENST00000261401	FSM	3900.08	0.395929	0.171954	2.30253	0.0213056	0.0574572	Not	CORO1C-PB.1327.1-Anno	Annotated	3258.55	4619.39	189.468	260.793	193.031	190.664	179.84	207.24	176.567	241.08	219.736	349.265	219.914	273.969
PB.1327.2	ENSG00000110880	CORO1C	ENST00000261401	ISM	350.241	0.13775	0.123493	1.11545	0.264659	0.418347	Not	CORO1C-PB.1327.2-Anno	Annotated	320.649	377.212	59.6347	68.1279	67.0599	52.1652	56.6158	56.7933	65.5391	80.0658	62.4769	51.3561	66.2195	80.5214
PB.2147.1	ENSG00000167549	CORO6	novel	NIC	96.7212	-0.982283	0.408151	-2.40667	0.0160988	0.0455925	Not	CORO6-PB.2147.1-novel	novel	126.4	66.2	6.58011	3.331	8.33563	4.34226	10.4985	4.78726	4.93695	3.46303	4.84201	2.30023	3.55747	2.49224
PB.2111.1	ENSG00000006695	COX10	ENST00000261643	FSM	277.993	0.511674	0.142706	3.5855	0.000336432	0.00161788	Not	COX10-PB.2111.1-Anno	Annotated	223.4	338.6	17.5821	25.8079	20.2449	17.6073	20.8052	13.6766	15.5763	27.9367	21.7212	31.2441	26.7622	21.3754
PB.2114.1	ENSG00000236088	COX10-DT	novel	NIC	322.134	-0.37836	0.136634	-2.76915	0.00562032	0.0185834	Not	COX10-AS1-PB.2114.1-novel	novel	353.239	289.966	51.3412	40.7865	61.8857	39.0418	59.1247	45.09	51.5636	47.6416	30.9898	43.1044	48.4108	33.7858
PB.742.1	ENSG00000014919	COX15	ENST00000016171	FSM	981.309	0.140743	0.0911594	1.54392	0.122607	0.233101	Not	COX15-PB.742.1-Anno	Annotated	910.016	1057.28	50.1547	56.6144	59.0819	50.3977	54.1002	39.2766	47.9172	61.8832	51.6083	57.5685	57.054	54.958
PB.4429.1	ENSG00000240230	COX19	ENST00000344111	FSM	389.921	0.145813	0.172731	0.844163	0.398578	0.555897	Not	COX19-PB.4429.1-Anno	Annotated	362.2	418.6	22.8425	25.8337	20.2543	26.6864	27.4347	18.0672	21.7697	29.7188	24.6456	24.1452	24.8195	25.8395
PB.551.1	ENSG00000203667	COX20	ENST00000411948	FSM	1388.56	-0.214492	0.089358	-2.40036	0.0163789	0.0462161	Not	COX20-PB.551.1-Anno	Annotated	1450.97	1320.58	170.441	150.716	181.854	138.065	190.84	161.944	179.504	155.115	143.666	142.339	164.608	147.852
PB.2146.1	ENSG00000108582	CPD	ENST00000225719	FSM	93.0039	1.26479	0.947769	1.33449	0.182044	0.316303	Not	CPD-PB.2146.1-Anno	Annotated	87.796	98.2303	2.63894	2.94362	8.22838e-10	0.954066	5.14396	6.28293	0.813761	1.37849	2.53756	2.25511	3.95455	4.59239
PB.2146.2	ENSG00000108582	CPD	ENST00000225719	FSM	2519.05	0.498273	0.13181	3.78024	0.000156675	0.00082707	Not	CPD-PB.2146.2-Anno	Annotated	2017.56	3087.06	54.2155	80.3346	56.6222	56.1975	56.562	48.6925	53.003	76.0177	79.2437	111.629	63.9349	70.8477
PB.2146.4	ENSG00000108582	CPD	ENST00000225719	FSM	1058.67	0.527509	0.199007	2.6507	0.00803249	0.0252597	Not	CPD-PB.2146.4-Anno	Annotated	837.838	1312.31	31.5271	47.8841	31.1831	36.1103	32.6038	32.6207	25.1177	41.3476	38.459	71.6924	39.6932	48.2281
PB.4636.1	ENSG00000106034	CPED1	ENST00000310396	ISM	251.719	-1.57099	0.142011	-11.0624	1.90909e-28	1.74506e-26	Not	CPED1-PB.4636.1-Anno	Annotated	367.766	129.825	40.1187	13.8357	27.8411	35.4989	52.3371	41.6862	43.2302	10.5006	12.4526	14.9705	16.7685	14.4861
PB.4636.2	ENSG00000106034	CPED1	ENST00000450913	ISM	300.922	-0.943619	0.135417	-6.96824	3.20919e-12	6.61551e-11	Not	CPED1-PB.4636.2-Anno	Annotated	383.581	214.46	34.1731	18.5591	43.079	39.7909	36.3732	30.352	21.2704	25.3807	19.4851	20.8367	17.2997	9.79344
PB.4636.5	ENSG00000106034	CPED1	ENST00000450913	ISM	395.061	-0.991196	0.195759	-5.06335	4.11947e-07	3.85687e-06	Not	CPED1-PB.4636.5-Anno	Annotated	526.668	259.211	49.6449	24.0202	10.2601	43.3973	67.4825	76.2598	50.8247	7.89359	23.8016	33.6164	29.2047	25.5849
PB.1247.1	ENSG00000135678	CPM	ENST00000551568	FSM	871.434	0.367333	0.173156	2.1214	0.0338881	0.0840189	Not	CPM-PB.1247.1-Anno	Annotated	751.687	1003.98	62.1253	79.5372	87.8892	46.7494	76.7482	41.7104	57.5292	72.7144	83.7443	85.1744	75.7097	80.3433
PB.1247.3	ENSG00000135678	CPM	novel	NIC	24.1535	-0.333952	0.972923	-0.343246	0.731414	0.840134	Not	CPM-PB.1247.3-novel	novel	21.8792	27.5012	2.61914	3.08988	3.9365	2.66857	2.74546	1.48629	2.25888	2.58301	2.73239	6.27161	0	3.8624
PB.4835.1	ENSG00000085719	CPNE3	ENST00000517490	FSM	2388.27	-0.519677	0.11092	-4.68515	2.7975e-06	2.23897e-05	Not	CPNE3-PB.4835.1-Anno	Annotated	2740.24	2023.46	124.106	89.3831	113.686	107.8	149.989	118.931	130.123	77.9446	91.5054	94.4339	107.317	75.7145
PB.4835.2	ENSG00000085719	CPNE3	ENST00000517490	FSM	84.8278	3.0764	1.71654	1.7922	0.0731003	0.155109	Not	CPNE3-PB.4835.2-Anno	Annotated	25.9612	154.539	1.26088	6.73718	4.41986	1.7494	0.0508425	0.0811786	0.0031358	0.0171252	2.61706	17.0516	0.530613	13.4695
PB.1921.1	ENSG00000103381	CPPED1	ENST00000381774	FSM	540.284	0.204373	0.118589	1.72336	0.0848227	0.174287	Not	CPPED1-PB.1921.1-Anno	Annotated	492.565	593.923	39.3441	45.9151	45.536	31.1135	52.3719	34.159	33.54	47.7491	42.3602	48.0402	48.6257	42.8002
PB.1921.2	ENSG00000103381	CPPED1	ENST00000381774	FSM	30.3421	3.73812	1.06799	3.50015	0.000465	0.00215429	Up	CPPED1-PB.1921.2-Anno	Annotated	7.90383	53.3679	0.648269	4.34076	0	0.585936	0	0.567199	2.08821	2.14168	6.4197	3.11938	2.03735	7.98572
PB.4925.1	ENSG00000071894	CPSF1	ENST00000616140	FSM	1068	-0.0408823	0.0934751	-0.43736	0.66185	0.78275	Not	CPSF1-PB.4925.1-Anno	Annotated	1054.2	1072.2	52.245	51.7366	72.8831	43.4769	40.2847	51.9589	52.6213	63.0011	49.6187	44.4769	56.4953	45.0909
PB.1678.1	ENSG00000165934	CPSF2	ENST00000298875	FSM	50.9191	0.0104773	1.36025	0.00770248	0.993854	0.996002	Not	CPSF2-PB.1678.1-Anno	Annotated	45.6697	55.4406	3.37662	3.99762	5.53495	7.49141	0	2.40501	1.45174	5.1412	8.82501	3.60969	2.41221	0
PB.1678.2	ENSG00000165934	CPSF2	ENST00000298875	FSM	1092.9	0.597225	0.111326	5.36466	8.11003e-08	8.84464e-07	Not	CPSF2-PB.1678.2-Anno	Annotated	846.589	1354.35	44.0362	68.6658	47.5113	44.6586	44.6138	45.6678	37.7295	68.4731	59.8056	73.5166	69.8277	71.7062
PB.1248.1	ENSG00000111605	CPSF6	novel	NIC	318.81	-0.336446	0.140053	-2.40228	0.0162932	0.0460119	Not	CPSF6-PB.1248.1-novel	novel	348.2	290.4	33.919	27.2944	40.3137	24.3896	42.894	32.7332	29.2644	28.4506	23.5453	30.8307	24.6709	28.9743
PB.929.1	ENSG00000149532	CPSF7	ENST00000439958	FSM	1022.71	-0.386182	0.110917	-3.48173	0.000498186	0.00228895	Not	CPSF7-PB.929.1-Anno	Annotated	1131.89	919.463	70.9755	55.6843	82.373	62.2959	95.118	56.6141	58.4764	59.0608	62.5513	65.6864	52.3273	38.7959
PB.929.2	ENSG00000149532	CPSF7	ENST00000394888	FSM	619.8	-0.477822	0.175292	-2.72587	0.00641321	0.0207995	Not	CPSF7-PB.929.2-Anno	Annotated	702.907	523.798	44.4687	32.3939	58.6976	54.7865	31.2928	32.0946	45.4719	44.1507	27.2245	26.5148	33.5254	30.554
PB.929.3	ENSG00000149532	CPSF7	ENST00000439958	FSM	45.6081	-3.6084	2.36714	-1.52437	0.127417	0.239816	Not	CPSF7-PB.929.3-Anno	Annotated	32.2007	56.5388	2.01322	3.65387	0.116514	1.46373	0.000155249	0.126147	8.35955	6.08594e-09	4.96628e-05	0.00113659	18.2682	0
PB.156.1	ENSG00000157184	CPT2	ENST00000371486	FSM	441.387	-0.148885	0.199318	-0.746971	0.455081	0.608302	Not	CPT2-PB.156.1-Anno	Annotated	455.929	426.002	42.93	38.8087	51.9403	26.9392	56.2999	35.0786	44.3918	43.7742	38.2344	33.0533	41.6467	37.3349
PB.3289.1	ENSG00000113851	CRBN	ENST00000231948	FSM	542.96	-0.52868	0.0911681	-5.79895	6.67295e-09	8.93199e-08	Not	CRBN-PB.3289.1-Anno	Annotated	623.634	459.437	88.0358	62.9205	79.7618	73.9204	98.2317	89.7303	98.5346	51.5323	60.5558	72.8746	64.4742	65.1656
PB.4531.1	ENSG00000241258	CRCP	ENST00000395326	FSM	383.291	-0.214629	0.146381	-1.46624	0.142583	0.262044	Not	CRCP-PB.4531.1-Anno	Annotated	401.938	364.789	65.1278	57.1531	70.9581	56.9822	86.6287	56.7619	54.3081	64.8015	53.8071	55.78	53.6396	57.7371
PB.2953.1	ENSG00000118260	CREB1	ENST00000353267	FSM	294.94	-0.325512	0.167763	-1.94031	0.0523421	0.118947	Not	CREB1-PB.2953.1-Anno	Annotated	319.574	270.674	27.7003	22.7408	25.2816	23.8452	29.678	23.741	35.9555	18.1201	23.0988	28.5213	22.991	20.9728
PB.2953.2	ENSG00000118260	CREB1	ENST00000353267	FSM	656.165	-0.274433	0.0940793	-2.91704	0.0035337	0.012544	Not	CREB1-PB.2953.2-Anno	Annotated	698.273	609.415	53.1338	45.2312	56.735	49.3184	55.0969	59.1399	45.3789	42.3069	43.103	43.5367	51.3526	45.8569
PB.2953.3	ENSG00000118260	CREB1	ENST00000432329	FSM	134.988	0.388753	0.306232	1.26947	0.204273	0.344438	Not	CREB1-PB.2953.3-Anno	Annotated	112.834	159.76	9.74342	13.3414	9.53127	7.05795	10.1376	11.5482	10.4421	11.095	17.133	17.3569	10.54	10.5819
PB.4973.1	ENSG00000107175	CREB3	ENST00000353704	FSM	849.5	-0.246246	0.0755385	-3.25987	0.00111462	0.00461458	Not	CREB3-PB.4973.1-Anno	Annotated	896.6	799.4	58.9345	51.2133	63.9525	60.6888	62.4491	55.065	52.5172	55.2541	48.9391	52.2869	53.9129	45.6735
PB.906.1	ENSG00000157613	CREB3L1	ENST00000621158	FSM	683.397	-0.0153751	0.181391	-0.0847621	0.932451	0.960803	Not	CREB3L1-PB.906.1-Anno	Annotated	674.152	688.808	56.7947	56.8725	39.1829	52.9063	50.1185	65.9876	75.7778	48.063	68.0646	58.6092	53.4093	56.2166
PB.906.2	ENSG00000157613	CREB3L1	ENST00000621158	FSM	287.204	-1.02173	1.93911	-0.526908	0.598258	0.729012	Not	CREB3L1-PB.906.2-Anno	Annotated	428.315	142.43	41.873	12.9444	143.454	36.4065	29.1485	0.356369	0	34.0548	0	18.933	11.7338	0.000433699
PB.906.3	ENSG00000157613	CREB3L1	ENST00000621158	FSM	1226.15	1.50169	0.411314	3.65096	0.000261266	0.00129275	Not	CREB3L1-PB.906.3-Anno	Annotated	705.732	1781.56	68.5212	172.047	18.4111	65.5247	45.8472	121.69	91.1327	177.302	142.349	212.178	149.489	178.916
PB.4672.1	ENSG00000182158	CREB3L2	ENST00000330387	FSM	5557.43	0.296582	0.130141	2.27893	0.0226714	0.060553	Not	CREB3L2-PB.4672.1-Anno	Annotated	4852.68	6346.16	142.625	180.562	183.894	123.311	131.357	139.026	135.538	185.962	153.235	225.929	174.177	163.507
PB.4483.1	ENSG00000146592	CREB5	ENST00000396298	FSM	855.682	-0.276928	0.21528	-1.28636	0.198317	0.336601	Not	CREB5-PB.4483.1-Anno	Annotated	904.8	814.6	115.495	99.3767	158.991	81.7743	121.333	117.357	98.0203	83.2096	71.7005	140.134	78.0209	123.819
PB.1114.1	ENSG00000111269	CREBL2	ENST00000228865	FSM	335.132	-0.64825	0.28174	-2.30088	0.0213983	0.057685	Not	CREBL2-PB.1114.1-Anno	Annotated	399.612	263.431	23.0986	15.0917	12.4587	30.7199	27.268	21.8277	23.2189	15.6377	20.8611	10.1917	17.1238	11.6443
PB.1114.2	ENSG00000111269	CREBL2	ENST00000228865	FSM	602.989	-0.570633	0.137696	-4.14416	3.41059e-05	0.000211927	Not	CREBL2-PB.1114.2-Anno	Annotated	701.988	501.169	53.4835	36.9471	60.5987	38.6473	56.6714	58.6055	52.8947	31.7296	35.2563	44.8248	38.557	34.3679
PB.3280.1	ENSG00000184164	CRELD2	novel	NIC	638.317	0.226263	0.113232	1.99823	0.0456917	0.106893	Not	CRELD2-PB.3280.1-novel	novel	574.406	707.115	37.8511	45.136	45.0394	28.3349	42.6137	33.9283	39.3389	48.4283	45.1201	45.8663	43.8122	42.453
PB.2055.1	ENSG00000103196	CRISPLD2	ENST00000262424	FSM	11372.9	0.486729	0.213963	2.27483	0.022916	0.0610653	Not	CRISPLD2-PB.2055.1-Anno	Annotated	9231.34	13763.6	443.593	640.967	552.323	483.647	346.337	501.161	334.5	602.213	590.293	892.328	593.49	526.511
PB.2071.1	ENSG00000167193	CRK	ENST00000300574	FSM	1048.17	0.0128562	0.122939	0.104574	0.916714	0.949234	Not	CRK-PB.2071.1-Anno	Annotated	1017.73	1080.96	102.044	105.372	109.381	123.775	98.1103	77.5596	101.393	113.817	104.741	116.897	99.3471	92.0573
PB.2071.2	ENSG00000167193	CRK	ENST00000398970	FSM	405.913	1.1088	0.704378	1.57415	0.115452	0.222549	Not	CRK-PB.2071.2-Anno	Annotated	315.699	508.572	35.6693	53.4317	93.2728	6.68843	5.03907	29.0608	44.2853	33.444	52.328	89.892	66.4206	25.0738
PB.2071.3	ENSG00000167193	CRK	ENST00000300574	FSM	166.729	-0.96699	0.582522	-1.66001	0.0969134	0.193911	Not	CRK-PB.2071.3-Anno	Annotated	215.581	112.096	20.6244	10.397	33.5488	23.9892	11.9942	28.0094	5.58046	4.03693	8.65967	8.24773	14.6443	16.3962
PB.2071.4	ENSG00000167193	CRK	ENST00000398970	FSM	366.156	0.293563	1.31537	0.22318	0.823395	0.893491	Not	CRK-PB.2071.4-Anno	Annotated	367.188	367.368	37.2549	36.9727	3.09422e-07	55.2241	70.2689	27.3963	33.3853	46.8247	31.7251	31.0585	22.4919	52.7635
PB.3195.1	ENSG00000099942	CRKL	ENST00000354336	FSM	1166.91	0.195145	0.191047	1.02145	0.307041	0.465317	Not	CRKL-PB.3195.1-Anno	Annotated	1079.08	1250.17	44.8281	50.18	75.2155	36.9646	27.927	41.1806	42.853	50.154	50.0066	47.1955	57.27	46.2737
PB.3195.2	ENSG00000099942	CRKL	ENST00000354336	FSM	1262.99	-0.944479	0.292521	-3.22876	0.00124329	0.00506873	Not	CRKL-PB.3195.2-Anno	Annotated	1634.41	879.295	68.2885	35.849	52.145	115.556	65.462	64.0804	44.1994	29.4763	28.6406	56.834	26.7488	37.5452
PB.2153.1	ENSG00000176390	CRLF3	ENST00000324238	FSM	541.781	-0.175248	0.183238	-0.956394	0.338873	0.497056	Not	CRLF3-PB.2153.1-Anno	Annotated	561.39	522.7	44.2505	39.8659	57.629	51.6897	39.8243	38.8391	33.2703	41.0488	35.4623	47.0146	34.4311	41.3727
PB.3351.1	ENSG00000170275	CRTAP	ENST00000320954	FSM	5237.32	-0.496488	0.0992802	-5.00087	5.70713e-07	5.22364e-06	Not	CRTAP-PB.3351.1-Anno	Annotated	5999.13	4469.78	340.73	246.681	336.869	259.6	432.797	365.911	308.471	223.626	244.154	279.173	267.902	218.55
PB.3351.2	ENSG00000170275	CRTAP	ENST00000320954	FSM	561.154	-0.992243	0.188682	-5.25881	1.44993e-07	1.51119e-06	Not	CRTAP-PB.3351.2-Anno	Annotated	740.863	374.293	33.6512	16.3455	56.9733	25.7088	37.2307	29.4018	18.9413	18.3948	16.4518	16.1114	16.575	14.1945
PB.1319.1	ENSG00000008405	CRY1	ENST00000008527	FSM	1532.59	0.022138	0.246112	0.0899509	0.928326	0.957547	Not	CRY1-PB.1319.1-Anno	Annotated	1489	1580.2	112.478	115.785	139.963	144.002	68.0001	111.634	98.7917	104.309	114.337	151.736	103.848	104.697
PB.3456.1	ENSG00000080200	CRYBG3	ENST00000389622	ISM	1540.26	-0.608064	0.0905756	-6.71333	1.90226e-11	3.56199e-10	Not	CRYBG3-PB.3456.1-Anno	Annotated	1809.4	1262.4	95.8923	64.9819	90.0738	77.7044	107.325	98.2033	106.154	50.5483	63.2438	76.4707	66.3212	68.3256
PB.411.1	ENSG00000242193	CRYZL2P	novel	NIC	346.386	-0.0804185	0.139174	-0.577827	0.563381	0.701753	Not	RP11-568K15.1-PB.411.1-novel	novel	347.109	348.941	27.6629	26.8879	31.9233	19.8088	33.5338	25.8941	27.1549	31.8678	24.3835	32.3302	24.4216	21.4363
PB.411.2	ENSG00000242193	CRYZL2P	ENST00000512906	FSM	349.945	-0.826187	0.294332	-2.80699	0.00500063	0.0167748	Not	RP11-568K15.1-PB.411.2-Anno	Annotated	434.291	258.659	38.2639	22.0292	57.6237	27.6132	44.5938	30.2694	31.2196	21.4181	25.1651	12.5504	28.1423	22.87
PB.1204.1	ENSG00000062485	CS	ENST00000351328	FSM	2564.85	0.431032	0.16326	2.64015	0.00828693	0.0259088	Not	CS-PB.1204.1-Anno	Annotated	2131.4	3045.6	163.575	226.41	198.209	196.83	152.638	126.836	143.363	235.668	194.733	289.885	218.185	193.579
PB.284.9	ENSG00000009307	CSDE1	ENST00000339438	FSM	305.902	-3.20513	1.19456	-2.6831	0.00729427	0.0232418	Down	CSDE1-PB.284.9-Anno	Annotated	500.033	119.078	32.7337	7.16082	67.7396	35.7801	54.1307	0.661054	5.35728	11.9616	0.0164297	22.8951	0.0336487	0.8973
PB.284.1	ENSG00000009307	CSDE1	ENST00000339438	FSM	2844.35	0.376158	0.118572	3.1724	0.00151183	0.00599812	Not	CSDE1-PB.284.1-Anno	Annotated	2408.12	3321.66	134.284	179.568	147.859	137.545	128.102	108.398	149.517	165.898	163.841	217.953	168.128	182.019
PB.284.11	ENSG00000009307	CSDE1	ENST00000339438	FSM	2175.72	0.743504	0.244384	3.04236	0.00234731	0.00881089	Not	CSDE1-PB.284.11-Anno	Annotated	1640.83	2762.05	112	185.232	85.5267	133.149	140.301	144.541	56.4833	224.681	153.511	222.887	178.142	146.939
PB.284.12	ENSG00000009307	CSDE1	ENST00000339438	FSM	45.2849	0.558549	0.976959	0.571721	0.567511	0.705022	Not	CSDE1-PB.284.12-Anno	Annotated	56.9	31.5094	4.32718	2.39074	0.176435	1.1728	1.82439	0.484396	17.9779	0.617648	1.96775	1.57073	6.4742	1.32337
PB.284.15	ENSG00000009307	CSDE1	ENST00000339438	FSM	797.471	-0.743271	0.423876	-1.75351	0.0795142	0.165625	Not	CSDE1-PB.284.15-Anno	Annotated	896.189	704.397	69.1237	52.1376	72.3104	99.6545	64.5205	48.5742	60.5588	20.246	24.4789	85.8985	28.4722	101.592
PB.284.17	ENSG00000009307	CSDE1	ENST00000689732	ISM	0.804549	0.744601	3.11124	0.239326	0.810853	0.884808	Not	CSDE1-PB.284.17-Anno	Annotated	0.0471819	1.57202	0.0037539	0.125723	0.00187801	0.000216208	0.000103409	0.0165637	8.21435e-06	5.99584e-08	1.64291e-05	2.40298e-06	1.08803e-05	0.628587
PB.284.18	ENSG00000009307	CSDE1	ENST00000534699	ISM	20.502	-2.32313	3.05002	-0.761676	0.446253	0.60045	Not	CSDE1-PB.284.18-Anno	Annotated	39.4241	0.0107648	4.6116	0.00123733	0	0.000140025	2.91813	0.0160796	20.1237	0.00194958	0.00423706	0	0	0
PB.284.2	ENSG00000009307	CSDE1	ENST00000358528	FSM	1293.65	0.169492	0.102316	1.65655	0.0976099	0.195023	Not	CSDE1-PB.284.2-Anno	Annotated	1184.7	1415.56	70.5767	82.0735	66.7145	64.0118	84.316	61.37	76.4714	81.9044	61.8122	90.8167	82.2298	93.6045
PB.284.3	ENSG00000009307	CSDE1	ENST00000339438	FSM	760.201	1.30316	0.978116	1.33232	0.182757	0.317244	Not	CSDE1-PB.284.3-Anno	Annotated	660.765	842.019	39.6518	50.4005	0.45575	7.5803	25.0409	79.124	86.0579	26.7503	81.6822	30.4501	49.3046	63.8152
PB.284.7	ENSG00000009307	CSDE1	ENST00000689631	ISM	1.70238	0.483167	3.10421	0.155649	0.87631	0.925399	Not	CSDE1-PB.284.7-Anno	Annotated	0.452954	2.91713	0.0775252	0.455512	0.387626	0	5.06662e-07	0	0	2.27756	0	0	0	0
PB.284.4	ENSG00000009307	CSDE1	ENST00000339438	FSM	70.0763	3.76928	1.06209	3.54891	0.000386827	0.00182312	Up	CSDE1-PB.284.4-Anno	Annotated	31.6143	109.846	1.94184	6.55032	0.343614	0.103369	0.676513	0.0455882	8.5401	6.8286	16.2016	6.35897	1.56231	1.80016
PB.3106.1	ENSG00000124207	CSE1L	ENST00000262982	FSM	424.633	0.390055	0.335694	1.16194	0.245261	0.395503	Not	CSE1L-PB.3106.1-Anno	Annotated	344.946	515.483	21.5968	31.235	17.0326	17.0367	26.3768	15.9264	31.6114	42.5347	33.4837	41.9078	9.92483	28.3238
PB.3106.2	ENSG00000124207	CSE1L	ENST00000262982	FSM	206.009	1.36272	1.97665	0.689409	0.490566	0.63859	Not	CSE1L-PB.3106.2-Anno	Annotated	102.238	320.262	6.4862	20.3549	1.80207	11.7123	2.18498e-05	18.9124	0.00417272	0.538955	4.02493	35.2339	20.9474	41.0294
PB.3106.3	ENSG00000124207	CSE1L	ENST00000262982	FSM	38.3061	3.17976	2.38418	1.33369	0.182305	0.316618	Not	CSE1L-PB.3106.3-Anno	Annotated	0.624411	79.1821	0.0383282	5.00982	0	0.00107971	0.000141293	0.164277	0.0261427	0.000509141	0.00334189	7.3998	17.5872	0.0582734
PB.3106.4	ENSG00000124207	CSE1L	ENST00000262982	FSM	1233.26	0.983638	0.104089	9.44999	3.3886e-21	1.69357e-19	Not	CSE1L-PB.3106.4-Anno	Annotated	805.192	1715.87	57.3426	117.415	68.5885	50.2245	74.1072	42.2158	51.5772	119.034	86.5733	170.192	99.9696	111.303
PB.267.1	ENSG00000184371	CSF1	ENST00000329608	FSM	3284.04	-1.56563	0.195571	-8.00543	1.19047e-15	3.56474e-14	Not	CSF1-PB.267.1-Anno	Annotated	4747.8	1712.6	262.491	92.509	262.682	206.368	225.301	381.439	236.662	61.1993	115.789	98.7095	118.324	68.5229
PB.625.1	ENSG00000169826	CSGALNACT2	novel	NIC	463.233	0.708999	0.237125	2.98998	0.00278996	0.0102117	Not	CSGALNACT2-PB.625.1-novel	novel	352.777	584.152	21.2568	34.5494	10.6203	19.2203	21.3247	30.8733	24.2456	25.4872	36.2813	46.3924	33.6142	30.972
PB.625.2	ENSG00000169826	CSGALNACT2	ENST00000374466	FSM	1482.29	0.118478	0.175658	0.674478	0.500007	0.648292	Not	CSGALNACT2-PB.625.2-Anno	Annotated	1392.42	1585.65	83.334	91.9083	104.613	65.0622	74.218	104.456	68.3219	90.3283	86.2507	114.181	85.4223	83.359
PB.4136.7	ENSG00000113712	CSNK1A1	ENST00000377843	FSM	569.727	-4.45231	1.46346	-3.04232	0.00234763	0.00881089	Down	CSNK1A1-PB.4136.7-Anno	Annotated	924.903	224.606	52.3473	11.5805	89.6497	101.759	61.7801	0.547187	8.00036	1.16057	1.94954	50.7055	4.08673	3.82348e-05
PB.4136.4	ENSG00000113712	CSNK1A1	ENST00000377843	FSM	663.782	4.84021	1.7681	2.73752	0.00619046	0.0201807	Up	CSNK1A1-PB.4136.4-Anno	Annotated	230.009	1117.84	13.8522	67.501	0	0.0224144	4.18242	40.1176	24.9386	51.8832	73.1184	70.3909	59.6749	82.4374
PB.4136.1	ENSG00000113712	CSNK1A1	ENST00000377843	FSM	1054.72	0.460615	0.150412	3.06236	0.00219599	0.00831365	Not	CSNK1A1-PB.4136.1-Anno	Annotated	867.264	1246.77	38.1971	53.6472	41.4615	48.9542	31.1227	32.9578	36.4894	54.234	49.6395	53.2682	49.1775	61.9167
PB.4136.10	ENSG00000113712	CSNK1A1	ENST00000377843	FSM	216.565	0.27942	1.05252	0.265477	0.790642	0.87671	Not	CSNK1A1-PB.4136.10-Anno	Annotated	162.918	285.818	9.26725	15.9471	0.555391	0.209424	2.87797	26.2591	16.4344	0.0366893	8.3806	44.1083	25.906	1.30368
PB.4136.11	ENSG00000113712	CSNK1A1	ENST00000377843	FSM	1040.97	0.240178	0.240481	0.998743	0.317919	0.476502	Not	CSNK1A1-PB.4136.11-Anno	Annotated	949.456	1137.8	62.2719	73.1663	53.1992	99.5618	57.5433	62.2791	38.7761	78.1627	78.7838	82.8884	51.8902	74.1066
PB.4136.12	ENSG00000113712	CSNK1A1	ENST00000657001	ISM	1157.65	0.179396	0.135729	1.32172	0.18626	0.320999	Not	CSNK1A1-PB.4136.12-Anno	Annotated	1056.95	1255.95	59.3519	68.9059	64.8346	71.6456	49.9437	52.0998	58.2358	71.0292	61.1291	65.8886	67.828	78.6548
PB.4136.2	ENSG00000113712	CSNK1A1	ENST00000377843	FSM	46.6902	-5.00516	2.99348	-1.67202	0.094521	0.19033	Not	CSNK1A1-PB.4136.2-Anno	Annotated	89.7194	0.0205627	4.88269	0.00109354	12.2877	1.38641e-06	0	0.225457	11.9003	0	0.000111147	2.31923e-07	0.00535633	0
PB.4136.3	ENSG00000113712	CSNK1A1	ENST00000515768	FSM	572.423	0.302617	0.241269	1.25427	0.209743	0.35154	Not	CSNK1A1-PB.4136.3-Anno	Annotated	506.143	646.162	28.148	34.6033	45.7523	27.0776	27.4396	23.99	16.4804	37.6057	22.5706	39.9117	36.1322	36.7961
PB.4136.8	ENSG00000113712	CSNK1A1	ENST00000261798	FSM	24.4757	-2.9811	2.351	-1.26801	0.204793	0.345064	Not	CSNK1A1-PB.4136.8-Anno	Annotated	45.8408	0.425201	2.45989	0.0231975	0.00303579	0.207261	0.000287562	4.15538	7.93348	0.0720618	0.0322111	0.0116514	6.29693e-05	2.27952e-08
PB.2311.1	ENSG00000141551	CSNK1D	ENST00000392334	FSM	1426.59	0.0286436	0.132576	0.216054	0.828945	0.896963	Not	CSNK1D-PB.2311.1-Anno	Annotated	1375.65	1477.44	88.7354	92.3872	114.026	98.0998	69.1089	74.6954	87.747	100.476	97.6512	100.885	76.7053	86.2194
PB.2311.2	ENSG00000141551	CSNK1D	ENST00000392334	FSM	761.362	-0.610309	0.188443	-3.23869	0.00120079	0.00491567	Not	CSNK1D-PB.2311.2-Anno	Annotated	889.35	628.363	52.5898	36.3547	51.5677	64.6589	49.4271	54.946	42.3495	38.5977	30.7394	46.8092	43.4192	22.2078
PB.3239.2	ENSG00000213923	CSNK1E	novel	NIC	165.063	-1.91522	0.48163	-3.97654	6.99253e-05	0.000402795	Not	CSNK1E-PB.3239.2-novel	novel	248.555	76.6556	36.303	10.7501	64.8858	28.2901	41.9753	18.531	27.8326	8.94441	10.827	7.74076	22.1474	4.09089
PB.3239.3	ENSG00000213923	CSNK1E	ENST00000396832	FSM	998.714	-0.156822	0.190547	-0.823011	0.410502	0.567966	Not	CSNK1E-PB.3239.3-Anno	Annotated	1022.38	973.582	157.713	145.352	189.446	169.702	119.576	170.891	138.951	150.393	141.337	178.599	120.768	135.662
PB.4069.1	ENSG00000151292	CSNK1G3	novel	NIC	1457.35	0.0492664	0.11747	0.419394	0.674928	0.793221	Not	CSNK1G3-PB.4069.1-novel	novel	1398.6	1536.4	73.73	78.5672	64.9323	58.6893	91.5958	75.8058	77.6265	71.0839	73.7814	100.327	66.1524	81.4917
PB.3016.1	ENSG00000101266	CSNK2A1	ENST00000646561	FSM	794.867	0.302454	0.197416	1.53206	0.125506	0.237121	Not	CSNK2A1-PB.3016.1-Anno	Annotated	690.811	900.813	36.0443	45.5158	48.1414	38.3336	29.1518	35.2323	29.3623	36.7117	50.7234	45.1205	39.9749	55.0484
PB.3016.2	ENSG00000101266	CSNK2A1	ENST00000646561	FSM	969.021	0.437358	0.212826	2.055	0.039879	0.0959222	Not	CSNK2A1-PB.3016.2-Anno	Annotated	797.589	1164.79	45.5537	64.8499	38.4076	50.1105	49.6381	38.2234	51.3891	73.1229	46.043	90.4772	62.2654	52.3409
PB.4817.1	ENSG00000104218	CSPP1	ENST00000677009	ISM	662.37	-0.0791098	0.144192	-0.548642	0.583251	0.717014	Not	CSPP1-PB.4817.1-Anno	Annotated	663.4	657.8	61.1758	59.1532	65.9927	77.4548	52.9743	55.9944	53.4629	54.2888	57.2327	59.8304	61.523	62.891
PB.912.1	ENSG00000149179	CSTPP1	ENST00000522712	FSM	532.613	-0.00690906	0.167311	-0.0412948	0.967061	0.982915	Not	C11orf49-PB.912.1-Anno	Annotated	517.683	545.292	86.9442	88.5715	113.11	64.2129	102.103	76.7889	78.5064	104.467	79.5849	67.8191	107.454	83.533
PB.3664.1	ENSG00000159692	CTBP1	ENST00000382952	FSM	1296.34	0.0108474	0.0901099	0.120379	0.904183	0.941592	Not	CTBP1-PB.3664.1-Anno	Annotated	1265.6	1340	117.412	119.994	141.848	88.5474	150.898	101.122	104.643	129.468	111.236	134.051	119.988	105.226
PB.804.1	ENSG00000175029	CTBP2	ENST00000411419	FSM	160.497	-0.86774	0.203665	-4.26063	2.03854e-05	0.000133475	Not	CTBP2-PB.804.1-Anno	Annotated	199.003	118.567	18.7557	11.0226	16.599	12.6122	21.0921	26.7512	16.724	8.52202	8.42854	8.55965	20.8231	8.77969
PB.804.2	ENSG00000175029	CTBP2	ENST00000531469	FSM	1001.84	-0.0533794	0.193312	-0.27613	0.782448	0.871409	Not	CTBP2-PB.804.2-Anno	Annotated	998.047	1005.75	101.279	99.229	114.813	123.69	81.5468	111.68	74.6653	93.4575	97.0149	118.258	89.3574	98.0571
PB.209.1	ENSG00000117151	CTBS	ENST00000370630	FSM	231.944	0.150018	0.156899	0.956138	0.339002	0.497056	Not	CTBS-PB.209.1-Anno	Annotated	216	252.4	39.6443	44.5704	40.0925	28.8018	58.5802	34.2405	36.5063	44.4881	43.1057	55.7686	43.4247	36.0647
PB.2012.1	ENSG00000102974	CTCF	ENST00000645699	FSM	1003.97	-0.0470938	0.08318	-0.566167	0.57128	0.708188	Not	CTCF-PB.2012.1-Anno	Annotated	992	1018.4	67.3082	67.1635	74.1847	59.337	71.5578	64.1395	67.322	74.2669	65.7728	71.7824	64.9965	58.9988
PB.2406.1	ENSG00000060069	CTDP1	ENST00000613122	FSM	383.724	0.384564	0.172554	2.22866	0.0258368	0.0674009	Not	CTDP1-PB.2406.1-Anno	Annotated	325.8	445.8	19.3816	25.7933	21.9016	24.2478	18.5712	13.7167	18.4707	29.1009	22.0362	28.7232	22.6736	26.4326
PB.1759.1	ENSG00000137770	CTDSPL2	ENST00000260327	FSM	1333.97	-0.024911	0.115561	-0.215565	0.829327	0.896963	Not	CTDSPL2-PB.1759.1-Anno	Annotated	1315.8	1366.14	85.8611	86.8685	70.2217	84.6648	107.192	84.6122	82.6148	86.0646	77.2687	107.66	82.3665	80.9827
PB.1759.2	ENSG00000137770	CTDSPL2	ENST00000260327	FSM	0.910551	0.748615	3.10996	0.240715	0.809776	0.884515	Not	CTDSPL2-PB.1759.2-Anno	Annotated	0.001187	1.85683	8.1027e-05	0.126269	0	4.51176e-08	0.000400831	2.83907e-08	4.23032e-06	0	0.000620021	1.52216e-05	0.630708	0
PB.4108.1	ENSG00000044115	CTNNA1	ENST00000302763	FSM	2997.29	0.0864931	0.179719	0.481267	0.630327	0.75537	Not	CTNNA1-PB.4108.1-Anno	Annotated	2812.39	3219.86	183.622	204.407	159.733	183.392	183.642	195.445	195.897	195.845	179.558	273.521	151.235	221.875
PB.4108.2	ENSG00000044115	CTNNA1	ENST00000302763	FSM	3446.49	0.182551	0.112833	1.61789	0.105687	0.207316	Not	CTNNA1-PB.4108.2-Anno	Annotated	3134.21	3784.14	187.403	219.478	215.222	167.908	178.931	189.332	185.623	188.2	223.316	249.081	227.233	209.561
PB.3366.1	ENSG00000168036	CTNNB1	ENST00000349496	FSM	3167.19	0.440419	0.072264	6.09459	1.09721e-09	1.59463e-08	Not	CTNNB1-PB.3366.1-Anno	Annotated	2622.34	3767.48	160.353	223.131	184.944	126.223	187.74	149.51	153.346	217.72	198.862	257.584	240.935	200.552
PB.3366.2	ENSG00000168036	CTNNB1	ENST00000396185	FSM	3030.47	0.350703	0.255464	1.37281	0.169812	0.299869	Not	CTNNB1-PB.3366.2-Anno	Annotated	2628.58	3455.8	174.631	223.921	204.999	257.451	103.405	155.707	151.591	270.331	207.132	275.562	171.045	195.534
PB.3366.4	ENSG00000168036	CTNNB1	ENST00000396183	FSM	2082.04	0.934086	0.155041	6.02475	1.69368e-09	2.42099e-08	Not	CTNNB1-PB.3366.4-Anno	Annotated	1369.34	2877.41	100.245	202.534	113.451	85.5491	109.906	88.8932	103.425	181.972	179.879	289.374	135.806	225.64
PB.920.1	ENSG00000198561	CTNND1	ENST00000358694	FSM	1580.23	-0.245793	0.0965375	-2.54609	0.0108936	0.0327469	Not	CTNND1-PB.920.1-Anno	Annotated	1661.37	1476.95	58.9725	51.4511	59.9204	65.5054	53.0987	55.1282	61.2098	58.3915	51.2486	41.8179	51.6381	54.1592
PB.920.2	ENSG00000198561	CTNND1	ENST00000358694	FSM	3164.7	-0.333947	0.187787	-1.77833	0.0753504	0.158817	Not	CTNND1-PB.920.2-Anno	Annotated	3479.98	2850.62	143.335	113.277	206.017	167.496	139.344	81.3105	122.509	118.386	113.151	135.404	114.146	85.2959
PB.920.3	ENSG00000198561	CTNND1	novel	NIC	281.747	0.108847	0.32208	0.337951	0.7354	0.842485	Not	CTNND1-PB.920.3-novel	novel	255.798	304.352	33.9343	39.424	43.3405	33.29	38.2899	21.0679	33.6832	61.9316	34.7743	18.0121	47.1977	35.2046
PB.920.4	ENSG00000198561	CTNND1	ENST00000529986	FSM	1573.8	0.404997	0.312198	1.29724	0.194548	0.331988	Not	CTNND1-PB.920.4-Anno	Annotated	1413.45	1706.47	62.5592	74.9868	63.4713	132.78	35.5645	30.9246	50.0559	91.6626	69.6369	51.2354	92.6377	69.7615
PB.121.1	ENSG00000171793	CTPS1	ENST00000463285	ISM	64.8659	0.829756	0.390202	2.12648	0.0334632	0.0832195	Not	CTPS1-PB.121.1-Anno	Annotated	46.5731	84.2114	5.67017	9.739	10.7225	4.0954	3.56326	4.16596	5.80368	10.687	11.9655	10.0068	6.28817	9.74756
PB.121.2	ENSG00000171793	CTPS1	ENST00000470271	FSM	321.745	1.82349	0.242165	7.52996	5.07547e-14	1.2963e-12	Not	CTPS1-PB.121.2-Anno	Annotated	141.427	516.789	9.81338	35.0438	7.1182	13.9713	12.1179	7.371	8.48851	36.6082	28.9929	44.1203	29.0752	36.4221
PB.854.1	ENSG00000198730	CTR9	ENST00000361367	ISM	232.477	-1.21567	0.339591	-3.57981	0.000343846	0.0016493	Not	CTR9-PB.854.1-Anno	Annotated	312.818	148.96	21.5055	10.0387	17.1663	29.4912	28.6588	14.4618	17.7495	9.37396	11.5247	11.0936	14.6732	3.52812
PB.854.4	ENSG00000198730	CTR9	ENST00000361367	ISM	53.4453	0.74756	1.57801	0.473736	0.635688	0.759829	Not	CTR9-PB.854.4-Anno	Annotated	48.6312	56.7991	3.47681	4.06296	0	3.05773	5.07733	6.4829e-09	9.24901	3.83213	0.546323	0.722487	6.96042	8.25343
PB.854.6	ENSG00000198730	CTR9	ENST00000361367	FSM	1719.55	-0.642825	0.127401	-5.04568	4.51917e-07	4.18596e-06	Not	CTR9-PB.854.6-Anno	Annotated	2056.55	1369.64	104.712	68.1607	91.9598	123.307	132.333	94.1177	81.8418	71.9217	70.6456	71.2716	65.7542	61.2102
PB.4718.18	ENSG00000164733	CTSB	ENST00000678242	FSM	21.5789	-1.33189	2.97594	-0.447553	0.654476	0.775878	Not	CTSB-PB.4718.18-Anno	Annotated	37.861	3.19129	2.38102	0.2129	0.0148169	3.04372e-07	0	9.20911	2.68115	0.303551	0	7.37006e-07	0.735725	0.0252248
PB.4718.19	ENSG00000164733	CTSB	ENST00000353047	FSM	22.554	-2.19444	2.55525	-0.858796	0.390453	0.548197	Not	CTSB-PB.4718.19-Anno	Annotated	42.12	0.631405	2.78897	0.0418787	5.44443e-06	3.22349e-07	0	2.67871	11.2661	0.000970243	0	4.23745e-07	0.0649433	0.14348
PB.4718.2	ENSG00000164733	CTSB	ENST00000530640	FSM	386.242	0.0241739	0.343102	0.0704571	0.94383	0.9673	Not	CTSB-PB.4718.2-Anno	Annotated	386.776	393.397	30.7049	29.6537	42.7033	26.5141	44.7604	9.43746	30.1093	19.442	40.4236	38.5835	26.0539	23.7656
PB.4718.22	ENSG00000164733	CTSB	ENST00000532409	FSM	445.972	1.09235	0.464636	2.35098	0.0187239	0.0517608	Not	CTSB-PB.4718.22-Anno	Annotated	306.688	586.938	24.8312	46.9178	16.7223	26.4688	44.1252	30.9138	5.92575	52.6114	58.373	24.3371	54.0883	45.1793
PB.4718.31	ENSG00000164733	CTSB	ENST00000679121	ISM	13.6414	-2.36571	3.04931	-0.775819	0.437856	0.592709	Not	CTSB-PB.4718.31-Anno	Annotated	25.9047	1.65861e-08	2.84374	1.77844e-09	4.13673	0	0	10.082	2.42907e-06	0	0	0	0	8.8922e-09
PB.4718.33	ENSG00000164733	CTSB	ENST00000353047	FSM	54.0168	1.62607	3.02044	0.538357	0.590331	0.722592	Not	CTSB-PB.4718.33-Anno	Annotated	0.364253	126.558	0.0257559	8.28449	0	0	1.58141e-08	1.32548e-05	0.128766	0.00841435	5.80335e-05	40.69	0.723897	5.83024e-05
PB.3872.1	ENSG00000256043	CTSO	ENST00000433477	FSM	963.62	-0.440543	0.210107	-2.09675	0.0360155	0.0883472	Not	CTSO-PB.3872.1-Anno	Annotated	1083.85	838.188	84.3036	63.6517	74.6058	56.4024	106.932	103.584	79.9934	62.0652	77.134	61.6236	73.2801	44.1557
PB.5168.1	ENSG00000256043	CTSO	ENST00000433477	FSM	597.29	-0.919131	0.259816	-3.53762	0.000403744	0.00189259	Not	CTSO-PB.5168.1-Anno	Annotated	769.949	419.012	70.1777	36.7897	93.7513	38.1637	97.8918	64.7833	56.2984	28.8472	38.1931	33.8552	50.0779	32.9748
PB.979.1	ENSG00000085733	CTTN	ENST00000346329	FSM	1128.25	0.176636	0.120874	1.46132	0.143927	0.263886	Not	CTTN-PB.979.1-Anno	Annotated	1031.22	1232.71	74.2258	86.084	85.1437	66.8062	89.3377	60.6361	69.2055	87.7971	69.9027	84.931	89.7177	98.0713
PB.979.2	ENSG00000085733	CTTN	ENST00000301843	FSM	916.483	0.506259	0.274709	1.84289	0.065345	0.141771	Not	CTTN-PB.979.2-Anno	Annotated	753.446	1049.8	52.3322	72.656	67.0623	14.3049	15.0668	91.7932	73.434	139.538	41.8497	17.2407	92.8385	71.8135
PB.979.3	ENSG00000085733	CTTN	ENST00000301843	FSM	1379.9	0.499724	0.300501	1.66297	0.0963186	0.19286	Not	CTTN-PB.979.3-Anno	Annotated	1148.89	1679.7	80.0254	111.663	65.466	112.663	135.028	20.1876	66.7829	43.7513	143.423	199.676	80.2201	91.244
PB.277.1	ENSG00000143079	CTTNBP2NL	ENST00000271277	FSM	468.465	-0.0135984	0.157427	-0.0863793	0.931165	0.959763	Not	CTTNBP2NL-PB.277.1-Anno	Annotated	458.151	478.17	33.5379	34.2342	30.0054	34.893	26.8459	39.5944	36.3508	27.7498	34.1044	39.2914	37.4104	32.615
PB.277.2	ENSG00000143079	CTTNBP2NL	ENST00000271277	FSM	20.7117	-0.299759	1.60154	-0.18717	0.851528	0.908786	Not	CTTNBP2NL-PB.277.2-Anno	Annotated	20.4102	21.2437	0.922339	0.917621	0.20313	0.0210666	3.56228	0.706296	0.118924	0.0284331	3.44674	0.0472173	0.345604	0.720111
PB.277.3	ENSG00000143079	CTTNBP2NL	ENST00000271277	FSM	450.321	0.0802167	0.33037	0.242809	0.808154	0.883576	Not	CTTNBP2NL-PB.277.3-Anno	Annotated	425.53	471.813	21.8083	23.878	18.0241	25.9597	12.673	26.1591	26.2256	31.2977	13.1233	24.8118	20.477	29.68
PB.277.4	ENSG00000143079	CTTNBP2NL	ENST00000271277	FSM	693.747	-0.155434	0.249297	-0.62349	0.532963	0.676897	Not	CTTNBP2NL-PB.277.4-Anno	Annotated	712.326	679.035	32.2867	29.5155	47.9933	24.4111	28.1776	33.4283	27.4233	23.1787	34.4455	37.6358	23.7018	28.616
PB.4684.1	ENSG00000055130	CUL1	ENST00000325222	FSM	127.531	0.426583	2.53036	0.168586	0.866122	0.918899	Not	CUL1-PB.4684.1-Anno	Annotated	99.7513	152.43	7.07469	10.9574	6.66345e-05	11.6349	12.7146	11.0238	1.78473e-05	13.5435	28.5342	9.96004e-06	12.7093	1.0414e-05
PB.4684.2	ENSG00000055130	CUL1	ENST00000325222	FSM	291.388	0.781754	0.348159	2.2454	0.0247427	0.0650951	Not	CUL1-PB.4684.2-Anno	Annotated	216.351	368.497	15.2625	25.6457	18.2456	23.7614	5.6853	20.3226	8.29742	34.3239	26.883	27.7558	28.3931	10.8727
PB.4684.3	ENSG00000055130	CUL1	ENST00000325222	FSM	603.239	1.66193	1.47103	1.12977	0.258572	0.411429	Not	CUL1-PB.4684.3-Anno	Annotated	491.722	705.276	35.295	50.2977	0.0027184	1.22171	46.2053	62.5954	66.4501	40.6022	45.264	19.2416	32.1688	114.212
PB.4684.4	ENSG00000055130	CUL1	ENST00000325222	FSM	498.503	-1.10421	1.40267	-0.787219	0.431154	0.586953	Not	CUL1-PB.4684.4-Anno	Annotated	589.376	435.197	44.3825	30.4195	86.0779	68.0277	44.3254	0.364598	23.1168	17.6132	0.214343	95.5512	32.4797	6.23891
PB.616.1	ENSG00000108094	CUL2	ENST00000691974	FSM	81.0773	-0.14049	0.473188	-0.2969	0.766543	0.862074	Not	CUL2-PB.616.1-Anno	Annotated	83.7893	78.5702	5.81655	5.36171	4.41155	10.0491	4.43296	4.32405	5.86507	7.2395	3.58917	7.65454	4.27205	4.05328
PB.616.2	ENSG00000108094	CUL2	ENST00000374749	FSM	306.475	-0.156332	0.195753	-0.798621	0.42451	0.580526	Not	CUL2-PB.616.2-Anno	Annotated	322.445	294.451	25.4169	22.4855	21.2971	12.539	37.5213	24.7661	30.961	18.8001	18.1327	27.9906	26.5455	20.9584
PB.616.3	ENSG00000108094	CUL2	ENST00000374751	FSM	366.068	1.2773	0.19182	6.65885	2.75979e-11	5.04533e-10	Not	CUL2-PB.616.3-Anno	Annotated	208.565	537.778	16.2145	40.6267	14.4633	21.1024	16.1013	12.3032	17.1024	38.5179	36.0569	53.5336	30.0107	45.0143
PB.5364.1	ENSG00000158290	CUL4B	ENST00000336592	FSM	236.796	-0.0595753	0.155397	-0.383374	0.701442	0.816371	Not	CUL4B-PB.5364.1-Anno	Annotated	234.481	242.517	10.4021	10.3664	11.5653	9.74793	12.2713	8.17994	10.246	8.87387	11.8001	13.8591	8.19181	9.10725
PB.5364.2	ENSG00000158290	CUL4B	ENST00000371322	FSM	37.5973	0.782041	3.09964	0.252301	0.800809	0.881382	Not	CUL4B-PB.5364.2-Anno	Annotated	0	74.6587	0	3.39539	0	0	0	0	0	0	0	2.11153e-09	0	16.977
PB.5364.3	ENSG00000158290	CUL4B	ENST00000371322	FSM	1281.21	-0.0976654	0.141069	-0.692323	0.488735	0.637484	Not	CUL4B-PB.5364.3-Anno	Annotated	1279.59	1301.68	54.5423	53.5754	62.4107	49.9926	58.5495	53.2856	48.4734	50.2936	55.2872	76.0489	46.0235	40.2237
PB.5364.4	ENSG00000158290	CUL4B	ENST00000371322	FSM	747.627	-0.316163	0.230201	-1.37342	0.169621	0.299684	Not	CUL4B-PB.5364.4-Anno	Annotated	798.726	688.946	51.9569	43.7224	64.6363	42.0678	64.6786	43.3931	45.0086	43.5783	38.6828	29.5267	66.7369	40.0872
PB.1026.1	ENSG00000166266	CUL5	novel	NIC	116.973	-0.17834	0.258195	-0.690716	0.489744	0.638201	Not	CUL5-PB.1026.1-novel	novel	122	111.6	13.5621	11.9257	20.6894	9.0303	15.2242	11.9323	10.934	12.3644	12.2718	10.8444	13.5737	10.574
PB.4254.1	ENSG00000044090	CUL7	novel	NIC	775.324	0.236149	0.101187	2.33378	0.0196072	0.0537618	Not	CUL7-PB.4254.1-novel	novel	701.4	862.4	28.532	33.846	36.3416	25.6832	38.1162	20.3175	22.2013	37.1447	34.9385	38.7029	30.7429	27.7008
PB.5086.1	ENSG00000226752	CUTALP	ENST00000687129	FSM	242.263	-0.465786	0.349905	-1.33118	0.18313	0.317441	Not	PSMD5-AS1-PB.5086.1-Anno	Annotated	282.315	200.904	30.5802	20.7931	53.6665	14.0286	43.6633	18.7715	22.7711	27.8877	22.8118	15.1405	23.6053	14.5203
PB.4597.1	ENSG00000257923	CUX1	ENST00000622516	FSM	846.387	-0.00226753	0.0776148	-0.0292152	0.976693	0.986491	Not	CUX1-PB.4597.1-Anno	Annotated	823	871	63.5748	65.3889	71.2779	56.1448	65.8242	63.9277	60.6994	63.3873	57.4686	67.7575	68.7365	69.5947
PB.2895.1	ENSG00000163510	CWC22	ENST00000404136	FSM	504.795	-0.0526866	0.112294	-0.469186	0.638937	0.762662	Not	CWC22-PB.2895.1-Anno	Annotated	501.682	509.529	36.3148	35.7812	38.6115	29.1294	44.8752	33.2794	35.6785	35.2671	34.1452	35.9363	34.6233	38.9339
PB.2895.2	ENSG00000163510	CWC22	ENST00000404136	FSM	177.398	-0.453898	0.192147	-2.36224	0.0181649	0.0506136	Not	CWC22-PB.2895.2-Anno	Annotated	199.718	155.071	19.1129	14.4883	15.5211	15.6593	23.8018	19.9029	20.6795	15.0636	9.72217	17.2285	16.8594	13.5676
PB.3966.1	ENSG00000153015	CWC27	ENST00000381070	FSM	324.276	0.474092	0.107778	4.3988	1.08852e-05	7.66934e-05	Not	CWC27-PB.3966.1-Anno	Annotated	264.6	390	38.935	55.3379	41.1322	31.0491	48.5088	33.2215	40.7634	52.2915	51.3356	63.1052	49.9114	60.0458
PB.1022.1	ENSG00000152404	CWF19L2	ENST00000282251	FSM	511.204	-0.485537	0.126809	-3.82887	0.000128733	0.000690661	Not	CWF19L2-PB.1022.1-Anno	Annotated	579.8	437.6	39.9428	29.3755	41.087	36.9897	46.4281	35.0591	40.15	31.762	32.3511	26.0913	29.2372	27.4359
PB.3745.1	ENSG00000163735	CXCL5	ENST00000296027	FSM	857.451	4.1371	0.351766	11.7609	6.20395e-32	7.18313e-30	Up	CXCL5-PB.3745.1-Anno	Annotated	89.2	1663	14.3538	262.486	18.1356	11.911	4.29112	21.1885	16.2425	204.137	100.573	234.239	446.068	327.411
PB.4111.1	ENSG00000171604	CXXC5	ENST00000302517	FSM	236.189	-1.25579	0.19329	-6.49692	8.19789e-11	1.40967e-09	Not	CXXC5-PB.4111.1-Anno	Annotated	324.501	142.988	41.7711	17.8319	46.2651	30.1431	50.6609	44.8682	36.9184	16.5754	19.9837	16.808	19.6166	16.1759
PB.4111.2	ENSG00000171604	CXXC5	ENST00000511048	FSM	298.012	-0.49916	0.287024	-1.73909	0.082019	0.169731	Not	CXXC5-PB.4111.2-Anno	Annotated	347.499	244.812	59.9441	40.9888	70.3767	42.8195	44.8224	102.392	39.3094	35.334	37.2784	50.3364	41.7676	40.2275
PB.2256.1	ENSG00000008283	CYB561	ENST00000360793	FSM	717.61	0.586459	0.104679	5.60246	2.11334e-08	2.60131e-07	Not	CYB561-PB.2256.1-Anno	Annotated	557.954	885.707	42.9999	66.4403	45.8257	48.4069	41.0531	34.3432	45.3708	76.1135	66.228	68.9869	56.2381	64.6348
PB.2256.2	ENSG00000008283	CYB561	ENST00000360793	FSM	1.77393	-2.19706	3.08139	-0.71301	0.475839	0.625821	Not	CYB561-PB.2256.2-Anno	Annotated	3.41709	0	0.378701	0	0.914218	0	8.22851e-09	0	0.979288	0	0	0	0	0
PB.928.1	ENSG00000162144	CYB561A3	ENST00000294072	FSM	323.945	0.18053	0.121136	1.49031	0.136142	0.252475	Not	CYB561A3-PB.928.1-Anno	Annotated	295.973	356.314	21.901	25.5514	24.2643	22.1368	25.6107	16.7842	20.7087	28.4324	24.1604	30.2112	24.067	20.8859
PB.928.2	ENSG00000162144	CYB561A3	novel	NNC	84.0473	-0.579869	0.566018	-1.02447	0.305612	0.463455	Not	CYB561A3-PB.928.2-novel	novel	100.827	66.6864	7.91649	5.11282	5.98189	4.55799	15.6539	7.65465	5.73399	6.42635	7.09596	2.2841	4.05579	5.70191
PB.2024.1	ENSG00000103018	CYB5B	ENST00000307892	FSM	933.163	0.0808526	0.0896018	0.902354	0.366869	0.525059	Not	CYB5B-PB.2024.1-Anno	Annotated	884.559	990.716	46.1304	50.0238	54.8481	44.0637	51.542	38.3873	41.8111	48.6183	45.0125	57.7331	49.2203	49.535
PB.3267.1	ENSG00000100243	CYB5R3	ENST00000352397	FSM	5614.61	-0.600995	0.141615	-4.24388	2.19687e-05	0.000142499	Not	CYB5R3-PB.3267.1-Anno	Annotated	6574.6	4611	813.653	553.029	910.298	610.438	948.669	803.297	795.562	540.769	580.486	571.727	657.153	415.013
PB.2869.3	ENSG00000071967	CYBRD1	ENST00000321348	FSM	3309.56	-2.27117	0.257972	-8.80392	1.32118e-18	5.2149e-17	Down	CYBRD1-PB.2869.3-Anno	Annotated	5287.98	1224.7	370.926	83.6952	459.167	260.169	415.327	352.09	367.878	93.3352	78.5791	80.3951	129.9	36.2671
PB.2869.1	ENSG00000071967	CYBRD1	ENST00000375252	FSM	757.371	-2.0346	0.282819	-7.19398	6.29288e-13	1.40117e-11	Down	CYBRD1-PB.2869.1-Anno	Annotated	1190.97	301.78	65.4867	16.2907	61.5524	25.7818	89.5669	76.1726	74.3597	13.4498	12.7659	10.9286	29.745	14.5644
PB.2869.2	ENSG00000071967	CYBRD1	ENST00000321348	FSM	9290.57	-1.83037	0.189673	-9.65015	4.90824e-22	2.5446e-20	Not	CYBRD1-PB.2869.2-Anno	Annotated	14084.9	4215.92	736.739	215.101	737.15	493.87	833.669	855.717	763.287	159.782	248.933	197.628	288.083	181.077
PB.1710.1	ENSG00000273749	CYFIP1	ENST00000617928	FSM	2539.13	0.123139	0.075482	1.63137	0.102812	0.202804	Not	CYFIP1-PB.1710.1-Anno	Annotated	2365.6	2747	119.351	134.139	132.033	102.227	136.885	108.664	116.948	135.607	122.232	164.649	116.115	132.091
PB.4149.1	ENSG00000055163	CYFIP2	ENST00000620254	FSM	167.634	0.0260099	0.276844	0.0939514	0.925148	0.955791	Not	CYFIP2-PB.4149.1-Anno	Annotated	162.6	173.6	8.81296	9.07124	13.0168	8.97646	8.23183	7.4551	6.38457	7.0751	7.95335	10.4548	10.3908	9.4822
PB.1982.1	ENSG00000083799	CYLD	ENST00000427738	ISM	336.548	-0.175574	0.188636	-0.930756	0.35198	0.510374	Not	CYLD-PB.1982.1-Anno	Annotated	348	322	41.4113	37.2995	47.3666	45.7671	28.53	47.2067	38.186	36.0055	40.7523	39.6095	35.6103	34.5197
PB.2669.2	ENSG00000138061	CYP1B1	ENST00000610745	FSM	168.774	-10.37	3.02657	-3.42632	0.000611823	0.00274544	Down	CYP1B1-PB.2669.2-Anno	Annotated	333.72	0	27.6194	0	55.4614	20.5377	44.4621	17.6055	0.0305032	0	0	0	0	0
PB.2669.1	ENSG00000138061	CYP1B1	ENST00000610745	FSM	2455.41	-0.458549	0.270782	-1.69343	0.090374	0.183629	Not	CYP1B1-PB.2669.1-Anno	Annotated	2737.28	2180.2	158.193	121.796	171.804	120.397	119.755	211.056	167.956	84.5583	118.628	193.442	119.624	92.7253
PB.2940.1	ENSG00000119004	CYP20A1	ENST00000356079	FSM	680.54	-0.229883	0.178304	-1.28928	0.197302	0.335448	Not	CYP20A1-PB.2940.1-Anno	Annotated	711.146	643.432	51.1289	45.1437	58.4822	46.6865	58.6829	39.3494	52.4437	51.804	40.749	33.1278	54.2801	45.7576
PB.2940.2	ENSG00000119004	CYP20A1	ENST00000356079	FSM	157.685	-0.814065	1.05768	-0.769673	0.441494	0.595892	Not	CYP20A1-PB.2940.2-Anno	Annotated	180.714	143.797	15.6919	11.9447	0.26922	17.4801	21.072	14.5367	25.1015	0.497128	9.55966	40.0501	9.60737	0.00928629
PB.3813.1	ENSG00000155016	CYP2U1	ENST00000332884	FSM	288.507	-0.963309	0.263475	-3.65617	0.000256011	0.00126765	Not	CYP2U1-PB.3813.1-Anno	Annotated	373.004	200.556	17.1417	8.99158	12.5189	11.9472	21.8596	20.246	19.1369	7.97748	11.4389	10.3125	9.02443	6.20453
PB.3813.3	ENSG00000155016	CYP2U1	ENST00000332884	FSM	113.956	-1.3228	0.464129	-2.85008	0.0043708	0.0149355	Not	CYP2U1-PB.3813.3-Anno	Annotated	157.586	67.6082	9.92408	4.11224	15.0101	11.6276	9.67717	7.46186	5.84362	1.85274	3.69797	3.8791	6.21116	4.92023
PB.3813.4	ENSG00000155016	CYP2U1	novel	NIC	110.96	-0.394126	0.288409	-1.36655	0.171766	0.302473	Not	CYP2U1-PB.3813.4-novel	novel	124.01	97.0358	16.3578	12.2625	27.3614	11.1287	18.0054	11.8082	13.4853	13.0793	10.9413	10.7026	15.4944	11.0949
PB.4569.1	ENSG00000001630	CYP51A1	ENST00000003100	FSM	752.305	-0.601573	0.198768	-3.02651	0.00247397	0.00923432	Not	CYP51A1-PB.4569.1-Anno	Annotated	884.997	606.239	63.096	42.1051	70.6613	89.2047	61.0885	43.9244	50.6011	33.061	46.335	36.5405	44.1169	50.4721
PB.4569.2	ENSG00000001630	CYP51A1	ENST00000450723	FSM	452.863	0.596682	0.242923	2.45626	0.0140392	0.0407906	Not	CYP51A1-PB.4569.2-Anno	Annotated	361.77	549.938	27.2516	40.7202	20.6364	21.8347	22.8174	45.5288	25.4408	40.7376	37.082	48.8256	40.2978	36.658
PB.4569.3	ENSG00000001630	CYP51A1	ENST00000003100	ISM	484.778	0.419738	0.122863	3.41632	0.000634743	0.00283756	Not	CYP51A1-PB.4569.3-Anno	Annotated	405.131	575.987	35.4102	48.4789	36.8979	41.5085	38.9951	18.6869	40.9625	45.7442	52.3694	65.249	29.7876	49.2444
PB.4569.4	ENSG00000001630	CYP51A1	ENST00000003100	FSM	84.5929	0.412769	0.747708	0.552046	0.580917	0.715538	Not	CYP51A1-PB.4569.4-Anno	Annotated	72.7423	102.166	7.72905	10.1393	15.7805	12.0045	3.369	6.53285	0.958412	6.39073	7.52651	27.4571	4.11738	5.20498
PB.2293.1	ENSG00000108669	CYTH1	ENST00000591455	FSM	757.038	-0.287334	0.14179	-2.02648	0.0427157	0.101175	Not	CYTH1-PB.2293.1-Anno	Annotated	812.138	696.185	55.1313	45.9024	72.8702	48.729	43.0664	62.0065	48.9841	49.8332	40.2026	49.1622	46.5636	43.7507
PB.2293.2	ENSG00000108669	CYTH1	novel	NIC	676.913	-0.119941	0.345262	-0.34739	0.728299	0.838015	Not	CYTH1-PB.2293.2-novel	novel	712.462	629.015	47.501	40.9217	58.7126	58.4436	13.8369	43.062	63.4501	42.4966	38.8929	43.7471	38.2268	41.245
PB.4440.1	ENSG00000008256	CYTH3	ENST00000350796	FSM	1697.56	-0.302922	0.146077	-2.07372	0.0381057	0.0923995	Not	CYTH3-PB.4440.1-Anno	Annotated	1827.8	1569.2	89.9606	74.6765	106.66	80.8738	111.725	70.1478	80.3957	62.9654	89.4302	78.4657	79.0042	63.5168
PB.2776.1	ENSG00000222041	CYTOR	novel	NIC	505.178	0.8902	0.241432	3.68717	0.00022676	0.00114235	Not	LINC00152-PB.2776.1-novel	novel	344.827	673.024	49.4629	92.992	57.2251	31.6561	51.381	40.4637	66.5886	85.6024	123.232	87.0528	85.2081	83.865
PB.3932.1	ENSG00000153071	DAB2	ENST00000320816	FSM	2154.52	-0.12408	0.190581	-0.651063	0.515006	0.66071	Not	DAB2-PB.3932.1-Anno	Annotated	2177.59	2151.55	111.516	107.157	88.7518	113.184	109.223	107.426	138.996	85.6949	114.473	152.524	101.785	81.3088
PB.3932.2	ENSG00000153071	DAB2	novel	NNC	1146.66	-0.54293	0.125851	-4.31408	1.6027e-05	0.000108202	Not	DAB2-PB.3932.2-novel	novel	1324.96	954.748	64.4894	45.4895	49.6964	58.955	60.3975	79.9215	73.4767	33.6885	48.8537	51.0713	48.7251	45.1089
PB.3932.4	ENSG00000153071	DAB2	ENST00000320816	FSM	0.400268	0.708302	3.12171	0.226896	0.820505	0.891631	Not	DAB2-PB.3932.4-Anno	Annotated	1.42084e-05	0.725015	1.028e-06	0.0490729	4.64415e-06	0	4.9587e-07	0	0	0.245207	0	3.93559e-07	0.000157316	0
PB.3932.5	ENSG00000153071	DAB2	ENST00000320816	FSM	141.185	2.07119	2.43786	0.849593	0.395551	0.55323	Not	DAB2-PB.3932.5-Anno	Annotated	41.7079	258.618	2.96871	17.1784	4.21964	4.97517e-09	10.6239	0	0	28.05	3.20987e-05	35.6231	22.219	0
PB.3932.6	ENSG00000153071	DAB2	ENST00000545653	FSM	1371.26	-0.361423	0.263488	-1.37169	0.170161	0.300256	Not	DAB2-PB.3932.6-Anno	Annotated	1506.14	1217.03	100.951	79.9822	91.6809	126.025	56.807	124.284	105.96	80.1442	100.06	94.3652	69.2376	56.1034
PB.3932.8	ENSG00000153071	DAB2	ENST00000339788	ISM	384.017	0.102028	0.263719	0.38688	0.698845	0.814713	Not	DAB2-PB.3932.8-Anno	Annotated	370.912	393.061	26.5308	27.7152	13.3024	19.9075	24.9617	33.6557	40.8267	25.0755	30.5408	23.1872	25.189	34.5834
PB.3932.9	ENSG00000153071	DAB2	ENST00000339788	ISM	0.208314	-0.834489	3.14172	-0.265615	0.790535	0.87671	Not	DAB2-PB.3932.9-Anno	Annotated	0.408882	0	0.0743461	0	0.371731	0	0	0	0	0	0	0	0	0
PB.3403.1	ENSG00000173402	DAG1	ENST00000308775	FSM	222.237	-0.625372	0.282567	-2.21318	0.0268853	0.0697171	Not	DAG1-PB.3403.1-Anno	Annotated	259.401	186.512	10.3877	7.20978	13.8944	9.31609	14.002	8.354	6.37191	5.10376	7.25681	9.00029	11.3562	3.33186
PB.3403.2	ENSG00000173402	DAG1	ENST00000308775	FSM	2364.15	-0.450578	0.106426	-4.23371	2.29866e-05	0.000148824	Not	DAG1-PB.3403.2-Anno	Annotated	2656.4	2065.89	109.058	82.2534	133.682	96.6594	121.777	94.5121	98.6613	84.5754	84.9325	89.8823	90.5243	61.3524
PB.4443.1	ENSG00000164535	DAGLB	ENST00000297056	FSM	428.049	-0.248984	0.188438	-1.32131	0.186399	0.321159	Not	DAGLB-PB.4443.1-Anno	Annotated	454	400.4	36.2428	31.0169	45.002	45.6822	28.0251	30.9479	31.5565	32.6644	29.6101	37.0653	27.8123	27.9324
PB.2833.1	ENSG00000115866	DARS1	ENST00000264161	FSM	504.768	-0.063511	0.215345	-0.294927	0.76805	0.862074	Not	DARS-PB.2833.1-Anno	Annotated	512.343	500.272	71.6548	67.0787	112.276	61.2896	87.5126	59.6505	37.5449	70.0874	51.248	73.4449	80.7067	59.9066
PB.2833.2	ENSG00000115866	DARS1	ENST00000264161	FSM	309.741	0.819601	0.856476	0.956945	0.338595	0.496948	Not	DARS-PB.2833.2-Anno	Annotated	268.849	354.71	38.2721	49.7063	0.576413	18.3081	37.6425	58.6856	76.1478	51.0509	74.7902	62.6918	13.4447	46.5539
PB.2833.4	ENSG00000115866	DARS1	novel	NIC	59.8376	0.0407341	0.630807	0.0645747	0.948513	0.970587	Not	DARS-PB.2833.4-novel	novel	54.9279	64.5944	8.75919	10.1211	6.99118	3.68111	16.3702	7.35549	9.39799	23.9152	5.39686	3.5909	7.61898	10.0836
PB.2833.3	ENSG00000115866	DARS1	ENST00000264161	FSM	259.659	3.94449	1.30808	3.01549	0.00256566	0.00948067	Up	DARS-PB.2833.3-Anno	Annotated	86.8984	449.573	13.1138	67.147	0	31.9859	13.8996	0.292852	19.3907	44.0725	34.2768	102.487	64.1344	90.7645
PB.405.1	ENSG00000117593	DARS2	ENST00000649689	FSM	710.125	0.19551	0.077554	2.52095	0.0117037	0.0347907	Not	DARS2-PB.405.1-Anno	Annotated	647.8	784.6	43.493	50.8461	48.5352	39.656	56.06	32.9045	40.3091	48.8881	48.1506	62.0152	45.5747	49.6017
PB.3542.1	ENSG00000138231	DBR1	ENST00000260803	FSM	514.617	-0.279425	0.168929	-1.6541	0.0981076	0.195663	Not	DBR1-PB.3542.1-Anno	Annotated	553.974	475.496	47.8172	39.8042	50.9735	40.3616	67.6992	38.3871	41.6645	40.239	36.3656	36.9106	42.1452	43.3608
PB.4984.1	ENSG00000122741	DCAF10	novel	NIC	40.972	-0.896485	0.734354	-1.22078	0.222169	0.367055	Not	DCAF10-PB.4984.1-novel	novel	45.3441	35.2107	2.97267	2.2675	3.77509	3.11172	2.70791	4.38329	0.885359	3.78732	5.69917	0.456091	0.663393	0.731534
PB.4984.2	ENSG00000122741	DCAF10	ENST00000377724	FSM	220.275	-1.05511	0.980121	-1.07651	0.281701	0.436825	Not	DCAF10-PB.4984.2-Anno	Annotated	265.931	169.406	16.5095	10.3474	15.9496	18.218	15.5209	10.1138	22.7451	18.2822	15.8591	7.76054	9.83532	1.99887e-06
PB.4984.3	ENSG00000122741	DCAF10	novel	NIC	144.785	0.0215489	0.30589	0.0704465	0.943838	0.9673	Not	DCAF10-PB.4984.3-novel	novel	143.806	148.572	9.99464	9.83309	13.922	4.49766	14.1161	7.00366	10.4339	7.16764	8.26773	12.3645	8.90485	12.4607
PB.4984.4	ENSG00000122741	DCAF10	ENST00000377724	FSM	338.971	0.68955	0.328743	2.09753	0.0359464	0.0882091	Not	DCAF10-PB.4984.4-Anno	Annotated	250.701	438.369	16.0272	27.0792	18.8505	16.6932	19.6418	16.6266	8.32384	21.7878	15.0311	37.2874	27.0871	34.2026
PB.4968.1	ENSG00000198876	DCAF12	ENST00000361264	FSM	1157.1	-0.182783	0.144464	-1.26525	0.205781	0.346308	Not	DCAF12-PB.4968.1-Anno	Annotated	1200.6	1115.6	74.7273	67.2645	92.7292	89.3167	67.9815	62.2738	61.3352	63.9062	66.6772	82.3345	64.7495	58.655
PB.4877.1	ENSG00000164934	DCAF13	novel	NIC	259.217	0.144661	0.146965	0.984323	0.324957	0.483089	Not	DCAF13-PB.4877.1-novel	novel	239.219	279.357	24.1853	27.5129	24.2674	19.8732	28.0342	24.2159	24.5358	29.6448	25.6683	24.6973	28.066	29.4881
PB.3687.5	ENSG00000163257	DCAF16	ENST00000507768	FSM	31.9771	-2.07291	0.654556	-3.16689	0.00154079	0.00609906	Down	DCAF16-PB.3687.5-Anno	Annotated	49.4174	13.9996	6.217	1.71674	3.932	4.67671	7.80169	9.17431	5.50028	2.17794	1.18687	3.27937	1.51928	0.420249
PB.3687.2	ENSG00000163257	DCAF16	novel	NIC	389.019	-0.56085	0.10038	-5.58727	2.30664e-08	2.82117e-07	Not	DCAF16-PB.3687.2-novel	novel	450.182	323.19	50.8776	35.4573	57.3786	48.1895	53.3637	43.6249	51.8312	38.1178	34.9965	34.8998	36.6925	32.5802
PB.3687.3	ENSG00000163257	DCAF16	ENST00000382247	FSM	2.71443	0.475848	3.05747	0.155635	0.876321	0.925399	Not	DCAF16-PB.3687.3-Anno	Annotated	2.93977	2.98212	0.348974	0.332436	0	0	1.74487	0	0	0	0	0.898982	0.763195	0
PB.3687.6	ENSG00000163257	DCAF16	novel	NIC	709.582	-0.144094	0.168814	-0.853569	0.393344	0.551253	Not	DCAF16-PB.3687.6-novel	novel	724.59	689.996	28.2491	26.2286	33.7275	20.7436	34.1077	25.0874	27.5792	32.0361	24.2418	19.5213	28.2124	27.1316
PB.2868.1	ENSG00000115827	DCAF17	novel	NIC	363.459	0.184281	0.187718	0.981687	0.326254	0.484292	Not	DCAF17-PB.2868.1-novel	novel	333.6	395	13.6399	15.7714	12.4178	12.1714	18.467	10.9089	14.2342	16.8063	16.2969	14.1585	17.2918	14.3035
PB.1639.1	ENSG00000139990	DCAF5	ENST00000341516	FSM	1395.88	-0.450653	0.0882812	-5.10475	3.31232e-07	3.14783e-06	Not	DCAF5-PB.1639.1-Anno	Annotated	1564.8	1219.4	121.013	91.6356	133.065	116.827	120.776	122.168	112.228	89.8498	94.6156	104.336	94.3704	75.0062
PB.391.1	ENSG00000143164	DCAF6	ENST00000470721	FSM	657.061	-0.165107	0.157641	-1.04736	0.294932	0.451398	Not	DCAF6-PB.391.1-Anno	Annotated	673.953	635.484	50.4402	46.5334	48.3113	43.6132	58.8235	50.0805	51.3724	55.755	44.0323	37.3939	46.3999	49.0862
PB.391.2	ENSG00000143164	DCAF6	novel	NIC	207.839	-0.24986	0.317838	-0.786124	0.431795	0.587711	Not	DCAF6-PB.391.2-novel	novel	222.376	192.656	19.8597	16.7352	25.6399	21.8549	14.4019	26.1162	11.2858	20.7536	12.6622	21.144	13.954	15.1623
PB.391.3	ENSG00000143164	DCAF6	ENST00000312263	FSM	61.429	0.0649358	2.62612	0.0247269	0.980273	0.988444	Not	DCAF6-PB.391.3-Anno	Annotated	95.2185	23.1246	6.55654	1.6301	0.00515045	16.5451	0.022177	5.114e-05	16.2103	2.89716e-07	0.158836	1.78974	6.2018	0.000140053
PB.391.4	ENSG00000143164	DCAF6	ENST00000312263	FSM	763.551	0.678701	0.346812	1.95697	0.0503506	0.115289	Not	DCAF6-PB.391.4-Anno	Annotated	581.658	968.762	40.9023	65.6391	51.6737	35.3887	42.4226	56.2474	18.779	61.8554	58.3282	92.4408	39.3549	76.2164
PB.391.5	ENSG00000143164	DCAF6	ENST00000367843	FSM	346.917	0.236358	0.345451	0.684201	0.493848	0.641864	Not	DCAF6-PB.391.5-Anno	Annotated	332.757	362.814	22.4579	24.1649	6.72294	36.4318	18.8046	17.9508	32.3793	16.7873	22.96	33.2533	24.7804	23.0435
PB.2257.1	ENSG00000136485	DCAF7	ENST00000614556	FSM	1460.12	0.106165	0.0750315	1.41494	0.157085	0.282494	Not	DCAF7-PB.2257.1-Anno	Annotated	1372.38	1558.12	67.617	74.4629	82.0865	65.3901	75.4943	54.4088	60.7052	79.9776	71.8635	79.3155	75.5544	65.6035
PB.363.1	ENSG00000132716	DCAF8	ENST00000368073	FSM	365.704	-1.05538	0.499515	-2.11281	0.0346175	0.0854915	Not	DCAF8-PB.363.1-Anno	Annotated	456.542	262.109	24.5196	13.9636	26.6973	31.5864	28.6448	20.3055	15.3639	16.0955	17.4562	2.02087	22.4461	11.7992
PB.363.10	ENSG00000132716	DCAF8	novel	NIC	46.6647	1.53964	1.55323	0.991248	0.321565	0.479617	Not	DCAF8-PB.363.10-novel	novel	57.5989	33.6434	8.37717	4.42675	36.4115	0.0359919	0	0	5.43832	11.3525	4.53205	0.444696	0	5.80452
PB.363.2	ENSG00000132716	DCAF8	ENST00000326837	FSM	392.878	-0.436622	0.477351	-0.914676	0.360362	0.518309	Not	DCAF8-PB.363.2-Anno	Annotated	423.807	363.335	24.1141	19.8584	34.3368	14.5223	27.6272	16.0368	28.0473	21.7032	29.0965	22.506	21.9634	4.02297
PB.363.3	ENSG00000132716	DCAF8	novel	NIC	265.609	0.101054	0.374028	0.270176	0.787025	0.873815	Not	DCAF8-PB.363.3-novel	novel	253.669	278.866	14.4672	15.7247	9.01672	13.4402	23.7317	17.0001	9.14714	25.6152	12.4359	12.7585	14.7911	13.0226
PB.363.4	ENSG00000132716	DCAF8	novel	NIC	188.662	-0.267092	0.470855	-0.567248	0.570546	0.707782	Not	DCAF8-PB.363.4-novel	novel	215.978	153.975	11.9274	8.21436	22.6763	6.07563	1.88514	16.5793	12.4206	8.17051	8.7841	4.32638	5.85189	13.9389
PB.363.7	ENSG00000132716	DCAF8	novel	NIC	139.666	0.583629	1.00355	0.581565	0.56086	0.699765	Not	DCAF8-PB.363.7-novel	novel	141.595	140.983	10.1577	9.93343	0.0104692	14.5375	22.7677	2.64204	10.8308	11.9092	12.74	11.2416	6.98739	6.78896
PB.363.8	ENSG00000132716	DCAF8	ENST00000368073	FSM	261.11	0.263223	0.358803	0.733614	0.463184	0.614894	Not	DCAF8-PB.363.8-Anno	Annotated	240.41	281.614	17.4543	19.8027	21.19	17.3508	7.45065	11.9997	29.2805	16.012	20.6714	23.3234	20.3139	18.693
PB.363.5	ENSG00000132716	DCAF8	ENST00000368074	FSM	67.4613	5.94322	1.62531	3.65666	0.000255525	0.00126649	Up	DCAF8-PB.363.5-Anno	Annotated	35.9793	103.139	2.08427	5.81311	0	4.29746	6.12389	0	0	3.7822	2.69252	7.443	2.34933	12.7985
PB.4354.1	ENSG00000164465	DCBLD1	novel	NIC	173.852	1.58453	0.28909	5.48109	4.22717e-08	4.87001e-07	Not	DCBLD1-PB.4354.1-novel	novel	81.5459	274.286	5.10447	16.6837	4.1681	5.30868	5.18359	4.27303	6.58893	13.3271	8.47604	22.3828	13.9477	25.2848
PB.4354.2	ENSG00000164465	DCBLD1	novel	NNC	74.7873	1.91985	0.982985	1.95308	0.0508098	0.116034	Not	DCBLD1-PB.4354.2-novel	novel	35.7732	116.767	2.08916	6.41281	4.88063	0.803494	2.98474	1.77696	0	7.36896	3.32356	6.45416	4.03087	10.8865
PB.4354.3	ENSG00000164465	DCBLD1	ENST00000338728	FSM	329.732	1.78872	0.263813	6.78028	1.19946e-11	2.3082e-10	Not	DCBLD1-PB.4354.3-Anno	Annotated	145.481	528.147	9.1141	31.5134	13.9302	8.19838	8.41274	3.41546	11.6138	24.6268	23.4963	38.3637	19.0065	52.0735
PB.3458.3	ENSG00000057019	DCBLD2	ENST00000326840	ISM	247.133	3.00881	0.860647	3.49598	0.000472315	0.00218163	Up	DCBLD2-PB.3458.3-Anno	Annotated	81.2646	420.371	8.18975	42.6986	7.55098e-07	20.874	3.6103	8.10309	8.36138	40.6157	42.9206	41.6383	27.838	60.4806
PB.3458.1	ENSG00000057019	DCBLD2	ENST00000326840	ISM	42.5966	2.14961	1.50562	1.42772	0.153371	0.277177	Not	DCBLD2-PB.3458.1-Anno	Annotated	20.8771	62.8642	0.973958	3.04746	0	3.14585	0.000393829	1.72354	0	4.32466	8.18321	0.0979522	2.63145	0
PB.3458.11	ENSG00000057019	DCBLD2	novel	NIC	340.515	0.0380725	0.186956	0.203644	0.838631	0.90223	Not	DCBLD2-PB.3458.11-novel	novel	326.807	353.318	30.9143	32.4587	36.1343	24.2251	38.4765	26.1071	29.6283	36.4808	31.0925	24.9373	34.7446	35.0384
PB.3458.4	ENSG00000057019	DCBLD2	ENST00000326840	FSM	136.667	2.33724	1.50787	1.55003	0.121135	0.230843	Not	DCBLD2-PB.3458.4-Anno	Annotated	100.358	176.168	3.66953	6.25522	0.0255589	0.250927	16.941	0.248233	0.881998	12.9777	16.386	0.0125321	1.02356	0.876265
PB.3458.5	ENSG00000057019	DCBLD2	novel	NNC	340.794	4.32182	2.1068	2.05137	0.0402311	0.0965074	Not	DCBLD2-PB.3458.5-novel	novel	81.3271	650.965	3.15497	24.073	0	3.17698e-09	5.75712	6.39905	3.61866	0.296484	6.27527	63.7815	1.49806e-08	50.0116
PB.3458.6	ENSG00000057019	DCBLD2	ENST00000326840	FSM	286.575	-1.3297	0.605679	-2.19538	0.0281361	0.0723931	Not	DCBLD2-PB.3458.6-Anno	Annotated	311.924	247.876	11.4296	9.06382	22.9902	13.7438	2.52553	9.45102	8.43717	10.3687	3.80966	1.07686	29.4466	0.617258
PB.3458.7	ENSG00000057019	DCBLD2	ENST00000326840	FSM	955.588	1.26981	0.191066	6.64589	3.01382e-11	5.46659e-10	Not	DCBLD2-PB.3458.7-Anno	Annotated	538.737	1413.5	19.9653	50.8033	23.1024	17.6293	17.8109	22.1661	19.1176	53.5799	46.4013	71.3415	48.8944	33.7994
PB.3458.8	ENSG00000057019	DCBLD2	ENST00000326840	FSM	287.004	1.63501	1.18543	1.37926	0.167815	0.297174	Not	DCBLD2-PB.3458.8-Anno	Annotated	163.322	413.213	8.38599	20.6695	9.95029	19.7153	0.000327727	0.822651	11.4414	20.5887	28.4946	19.4498	1.27467	33.5401
PB.3741.1	ENSG00000156136	DCK	ENST00000286648	FSM	345.797	0.430238	0.142471	3.01983	0.0025292	0.0093909	Not	DCK-PB.3741.1-Anno	Annotated	286.2	412.8	25.3606	35.4184	26.9812	23.061	29.9094	25.2468	21.6047	33.6836	27.6466	44.611	33.3526	37.7982
PB.285.1	ENSG00000118655	DCLRE1B	ENST00000648795	FSM	297.407	0.391633	0.158347	2.47326	0.0133887	0.0391627	Not	DCLRE1B-PB.285.1-Anno	Annotated	255.2	348.4	16.2328	21.2813	19.0756	10.9951	25.2141	13.0387	12.8408	21.2624	21.1102	27.915	19.157	16.9618
PB.580.1	ENSG00000152457	DCLRE1C	ENST00000378258	FSM	93.5203	0.537291	0.322633	1.66533	0.0958463	0.192233	Not	DCLRE1C-PB.580.1-Anno	Annotated	75.5211	113.473	7.00949	10.1781	8.16033	8.15207	7.66589	3.49099	7.57818	9.89109	7.88824	12.095	10.4386	10.5773
PB.580.2	ENSG00000152457	DCLRE1C	ENST00000697075	FSM	138.451	-0.366082	0.228503	-1.60209	0.109136	0.212569	Not	DCLRE1C-PB.580.2-Anno	Annotated	152.372	124.182	14.6643	11.5718	17.2578	9.59072	18.2646	14.9621	13.2463	13.4987	11.9878	11.9946	11.8241	8.55398
PB.3428.1	ENSG00000272886	DCP1A	ENST00000610213	FSM	652.272	-0.451749	0.355097	-1.27219	0.203307	0.34331	Not	DCP1A-PB.3428.1-Anno	Annotated	720.045	589.772	82.4104	65.5986	69.2193	122.398	57.1065	96.9866	66.3415	62.0112	60.8571	121.512	38.5613	45.0509
PB.3428.2	ENSG00000272886	DCP1A	ENST00000294241	FSM	151.257	1.12629	0.531571	2.1188	0.0341075	0.0844423	Not	DCP1A-PB.3428.2-Anno	Annotated	91.3789	215.087	11.2365	25.5819	12.05	11.592	2.8063	9.90953	19.8247	10.2013	16.0915	33.4189	23.6677	44.53
PB.2753.1	ENSG00000204843	DCTN1	ENST00000409240	FSM	2741.94	0.149495	0.0746129	2.0036	0.0451127	0.105735	Not	DCTN1-PB.2753.1-Anno	Annotated	2539.2	2975.6	136.343	155.328	134.218	121.619	168.422	121.456	136.001	162.85	140.259	175.905	151.142	146.485
PB.4139.1	ENSG00000132912	DCTN4	ENST00000447998	FSM	1561.92	0.207582	0.0887579	2.33874	0.0193488	0.0531592	Not	DCTN4-PB.4139.1-Anno	Annotated	1410.6	1740.6	82.5444	98.7896	82.2385	81.4241	97.5454	74.508	77.0062	97.4505	86.6498	127.238	88.8528	93.7566
PB.1951.1	ENSG00000166847	DCTN5	ENST00000300087	FSM	690.219	0.360834	0.124773	2.89192	0.00382892	0.0133805	Not	DCTN5-PB.1951.1-Anno	Annotated	593.4	796.2	39.7601	51.8974	41.1408	50.4893	44.5667	30.1016	32.5022	52.4904	51.6794	59.127	49.9063	46.2838
PB.3618.1	ENSG00000043093	DCUN1D1	ENST00000632685	FSM	822.571	0.101442	0.101958	0.994939	0.319766	0.478341	Not	DCUN1D1-PB.3618.1-Anno	Annotated	772.8	879.2	69.018	76.2782	69.217	62.206	80.7119	69.8367	63.1184	76.8959	67.9565	84.8243	70.5882	81.1258
PB.3718.1	ENSG00000109184	DCUN1D4	ENST00000334635	FSM	557.52	0.0388931	0.183676	0.211748	0.832303	0.898886	Not	DCUN1D4-PB.3718.1-Anno	Annotated	533.586	586.056	27.7278	29.6057	27.5201	29.4903	28.381	30.1013	23.1463	26.7654	27.0911	36.635	23.7949	33.7424
PB.3718.2	ENSG00000109184	DCUN1D4	ENST00000334635	FSM	520.172	-0.0107128	0.147519	-0.0726194	0.942109	0.966597	Not	DCUN1D4-PB.3718.2-Anno	Annotated	507.414	533.944	41.9934	43.1121	40.3356	44.3467	36.2228	44.3145	44.7474	39.3453	40.5806	50.8914	45.9018	38.8415
PB.1017.1	ENSG00000137692	DCUN1D5	ENST00000260247	FSM	446.822	0.861399	0.150927	5.70737	1.14737e-08	1.46792e-07	Not	DCUN1D5-PB.1017.1-Anno	Annotated	307.4	600	15.4575	29.2466	15.8999	14.4435	18.5647	14.605	13.7744	31.0165	23.9928	36.7337	22.5413	31.9488
PB.2486.1	ENSG00000130311	DDA1	ENST00000359866	FSM	948.705	0.109351	0.0823937	1.32717	0.184451	0.319118	Not	DDA1-PB.2486.1-Anno	Annotated	888.626	1012.99	48.6193	53.7805	58.5938	48.4497	48.7686	40.7391	46.5453	54.5891	50.7678	56.9469	52.8726	53.7262
PB.213.1	ENSG00000153904	DDAH1	ENST00000426972	FSM	808.877	0.113858	0.22282	0.510985	0.609361	0.7393	Not	DDAH1-PB.213.1-Anno	Annotated	766.329	857.088	43.0847	46.3879	54.9003	20.9298	50.2447	41.1201	48.2286	46.8573	45.7391	47.7931	34.5444	57.0058
PB.213.2	ENSG00000153904	DDAH1	ENST00000284031	FSM	315.317	-0.372275	0.222892	-1.6702	0.094879	0.190664	Not	DDAH1-PB.213.2-Anno	Annotated	341.425	288.15	19.2618	15.797	21.918	21.2057	17.8799	15.9214	19.3842	18.2635	19.044	18.5891	14.5428	8.54581
PB.213.7	ENSG00000153904	DDAH1	ENST00000633113	ISM	74.0674	0.137496	2.61512	0.0525773	0.958069	0.976339	Not	DDAH1-PB.213.7-Anno	Annotated	37.6567	123.235	2.34567	7.48926	3.15828e-08	7.09424	0	4.63413	1.82937e-06	0.0324488	6.39133e-06	29.0662	0.14093	8.20671
PB.213.8	ENSG00000153904	DDAH1	novel	NNC	216.364	0.618548	0.341598	1.81075	0.0701796	0.149804	Not	DDAH1-PB.213.8-novel	novel	174.955	261.096	9.94355	14.4712	6.52997	7.51434	10.0883	4.55144	21.0337	21.2844	11.0312	16.6358	8.01578	15.3886
PB.213.4	ENSG00000153904	DDAH1	ENST00000284031	FSM	48.7352	6.7465	1.84191	3.66278	0.000249493	0.00124246	Up	DDAH1-PB.213.4-Anno	Annotated	0.606601	96.1801	0.0372553	5.59079	0.113173	0.000296899	0	0.0727989	7.13435e-06	0.000962927	14.9544	0.389025	9.03658	3.573
PB.213.3	ENSG00000153904	DDAH1	ENST00000426972	FSM	176.946	7.6834	1.77291	4.33378	1.46568e-05	9.9629e-05	Up	DDAH1-PB.213.3-Anno	Annotated	33.9296	334.703	1.87197	18.7231	0.68314	8.6763	0	2.63407e-05	0.000370321	19.407	13.0096	31.2655	27.1028	2.83071
PB.213.5	ENSG00000153904	DDAH1	ENST00000284031	FSM	55.1935	9.69262	2.81983	3.4373	0.000587541	0.00265559	Up	DDAH1-PB.213.5-Anno	Annotated	35.8752	83.5576	2.10393	4.75866	0	0.000737842	0	10.5189	0	0.270574	7.07541e-07	20.1725	1.6533e-06	3.3502
PB.927.1	ENSG00000167986	DDB1	ENST00000301764	FSM	2967.42	0.449751	0.151467	2.96929	0.00298484	0.010828	Not	DDB1-PB.927.1-Anno	Annotated	2443.44	3567.4	127.779	180.886	124.293	151.381	148.902	101.632	112.687	170.104	147.906	247.534	152.403	186.483
PB.927.2	ENSG00000167986	DDB1	ENST00000679588	ISM	435.26	0.309387	0.301714	1.02543	0.305159	0.462971	Not	DDB1-PB.927.2-Anno	Annotated	357.956	505.202	28.4276	39.4258	35.0139	25.0852	26.3292	22.6877	33.022	58.8356	44.8623	14.8847	49.0729	29.4733
PB.1595.1	ENSG00000100523	DDHD1	ENST00000357758	FSM	701.835	-0.566834	0.112349	-5.04532	4.52772e-07	4.18829e-06	Not	DDHD1-PB.1595.1-Anno	Annotated	818.6	584.2	51.3462	35.5766	51.2289	40.5487	63.5499	55.8804	45.5233	34.0027	36.2914	42.4341	35.9542	29.2006
PB.1595.2	ENSG00000100523	DDHD1	novel	NIC	60.0589	-0.406456	0.346633	-1.17258	0.240963	0.390203	Not	DDHD1-PB.1595.2-novel	novel	67.4	53	7.78801	5.87564	10.2133	5.72872	11.0764	5.83399	6.08757	4.98708	6.11559	6.59028	6.95146	4.73378
PB.38.1	ENSG00000197312	DDI2	ENST00000480945	FSM	879.405	0.0368448	0.135793	0.27133	0.786137	0.87307	Not	DDI2-PB.38.1-Anno	Annotated	843.4	914.6	52.5024	55.7363	48.0027	53.112	56.213	49.8426	55.3418	66.8985	52.2654	52.9797	52.1855	54.3525
PB.1215.1	ENSG00000175197	DDIT3	novel	NIC	1175.19	-1.00439	0.268359	-3.74271	0.000182046	0.000936797	Not	DDIT3-PB.1215.1-novel	novel	1550.19	785.271	130.832	64.6712	119.746	75.3746	205.344	120.79	132.904	73.1192	65.4621	45.9919	79.799	58.9836
PB.51.1	ENSG00000244038	DDOST	ENST00000602624	FSM	1475.55	0.817587	0.0956855	8.54452	1.29068e-17	4.64579e-16	Not	DDOST-PB.51.1-Anno	Annotated	1048.1	1962.64	124.896	224.908	125.644	85.3795	179.761	100.892	132.803	237.732	179.443	317.957	186.408	203
PB.51.2	ENSG00000244038	DDOST	ENST00000602624	FSM	268.827	0.375089	0.580498	0.646151	0.518182	0.663559	Not	DDOST-PB.51.2-Anno	Annotated	231.256	304.297	28.5003	36.1024	44.328	37.4865	16.4266	37.7947	6.46546	10.5306	62.3144	30.2098	32.0152	45.442
PB.378.4	ENSG00000162733	DDR2	ENST00000367921	FSM	29.887	-5.68503	2.39985	-2.36891	0.0178405	0.0498143	Down	DDR2-PB.378.4-Anno	Annotated	56.7492	0.0099453	3.99989	0.00072421	5.30134e-06	0.758115	0.340114	0.829113	18.0721	0.0036196	0	1.45458e-06	0	0
PB.378.1	ENSG00000162733	DDR2	ENST00000367921	FSM	4577.58	0.0808904	0.13249	0.610539	0.541505	0.685236	Not	DDR2-PB.378.1-Anno	Annotated	4333.75	4894.25	134.057	146.711	128.826	103.906	154.555	134.549	148.451	134.217	141.606	196.439	130.961	130.334
PB.378.5	ENSG00000162733	DDR2	ENST00000446985	ISM	524.464	-0.400866	0.175219	-2.2878	0.022149	0.0594547	Not	DDR2-PB.378.5-Anno	Annotated	578.671	471.855	64.6112	50.7853	94.4854	50.9433	82.5713	52.5176	42.5384	59.5569	39.4141	57.2232	70.5299	27.2026
PB.378.6	ENSG00000162733	DDR2	ENST00000367921	ISM	56.7929	2.20935	3.04298	0.726047	0.46781	0.61926	Not	DDR2-PB.378.6-Anno	Annotated	0	112.547	0	6.6711	0	0	0	0	0	0.0148967	0.00168274	5.58304e-05	11.8408	21.498
PB.378.8	ENSG00000162733	DDR2	ENST00000367921	ISM	22.1432	6.68386	3.03153	2.20478	0.0274695	0.0709406	Not	DDR2-PB.378.8-Anno	Annotated	0	43.8598	0	4.42298	0	0	0	0	0	4.47608e-09	7.93902	0	5.73657	8.43932
PB.378.9	ENSG00000162733	DDR2	ENST00000367921	ISM	24.2379	1.8878	2.90552	0.649727	0.515868	0.661328	Not	DDR2-PB.378.9-Anno	Annotated	14.9197	32.7044	2.1112	4.12648	10.556	0	0	0	0	3.47974	1.40299e-06	0	6.20536	10.9473
PB.378.3	ENSG00000162733	DDR2	ENST00000367921	FSM	150.152	8.26728	2.2039	3.7512	0.000175988	0.000910344	Up	DDR2-PB.378.3-Anno	Annotated	61.7527	236.294	3.45497	13.4854	0.000446519	7.29298e-06	5.44279	11.8295	0.00210551	17.0478	9.016	1.497	16.5834	23.283
PB.3025.1	ENSG00000198171	DDRGK1	ENST00000354488	FSM	398.09	-0.0512071	0.173794	-0.294642	0.768267	0.862074	Not	DDRGK1-PB.3025.1-Anno	Annotated	393.4	400.4	30.6623	30.4075	37.5977	32.5014	31.4419	21.7033	30.0669	36.2632	28.2695	25.2484	35.3968	26.8596
PB.2627.1	ENSG00000079785	DDX1	ENST00000233084	ISM	1126.41	0.728421	0.102031	7.13924	9.38472e-13	2.04375e-11	Not	DDX1-PB.2627.1-Anno	Annotated	822.4	1463.8	97.462	167.754	97.2519	87.905	108.992	86.3957	106.765	161.548	142.941	222.431	151.666	160.185
PB.1030.1	ENSG00000178105	DDX10	ENST00000526794	ISM	168.63	-0.249988	0.224234	-1.11485	0.264913	0.418547	Not	DDX10-PB.1030.1-Anno	Annotated	178.003	159.537	17.6926	15.4932	17.05	23.3889	18.2304	15.9683	13.8252	16.3136	14.335	18.8667	18.1889	9.76178
PB.1030.2	ENSG00000178105	DDX10	ENST00000322536	FSM	499.46	0.536317	0.229812	2.33372	0.0196103	0.0537618	Not	DDX10-PB.1030.2-Anno	Annotated	400.197	607.263	27.9987	41.327	28.5608	41.098	24.9851	22.3507	22.9991	35.3322	36.0171	51.8102	35.2673	48.208
PB.1145.1	ENSG00000013573	DDX11	ENST00000542838	FSM	562.843	0.376469	0.262416	1.43463	0.151394	0.274388	Not	DDX11-PB.1145.1-Anno	Annotated	517.6	626.4	29.9601	34.6363	36.1981	20.8495	60.0451	11.4093	21.2987	35.6015	32.0472	42.5336	31.3327	31.6662
PB.2809.1	ENSG00000088205	DDX18	ENST00000263239	FSM	1771.95	0.272853	0.0977807	2.79046	0.00526333	0.0175369	Not	DDX18-PB.2809.1-Anno	Annotated	1553.8	2017.8	93.0558	116.853	121.244	82.376	101.592	80.2567	79.8099	156.444	98.59	137.504	90.201	101.526
PB.2028.1	ENSG00000168872	DDX19A	ENST00000302243	FSM	1351.06	0.0948234	0.0719203	1.31845	0.187353	0.322323	Not	DDX19A-PB.2028.1-Anno	Annotated	1272.87	1440.73	98.7221	108.445	107.781	85.1692	115.844	87.7568	97.0592	119.795	97.7796	119.644	108.834	96.1746
PB.659.1	ENSG00000165732	DDX21	ENST00000354185	FSM	2688	0.966701	0.300792	3.21386	0.00130965	0.00529579	Not	DDX21-PB.659.1-Anno	Annotated	1772.32	3701.86	118.32	240.772	108.659	171.422	78.2623	117.292	115.964	216.733	181.824	365.21	180.376	259.718
PB.659.2	ENSG00000165732	DDX21	ENST00000620315	FSM	559.075	-0.195401	0.25819	-0.756813	0.449162	0.603312	Not	DDX21-PB.659.2-Anno	Annotated	574.276	539.738	38.8092	35.826	34.8455	60.1075	28.3982	35.9592	34.7357	47.568	46.6338	39.775	25.6519	19.5015
PB.1169.1	ENSG00000174243	DDX23	ENST00000308025	FSM	1131.7	0.044244	0.060329	0.733379	0.463327	0.614967	Not	DDX23-PB.1169.1-Anno	Annotated	1085.8	1184.6	75.1801	79.6005	84.4146	71.2093	86.5351	64.5819	69.1596	85.5362	77.3645	85.4685	77.6812	71.9519
PB.3108.2	ENSG00000124228	DDX27	ENST00000618172	FSM	110.389	-4.99602	1.57217	-3.17779	0.00148405	0.00589461	Down	DDX27-PB.3108.2-Anno	Annotated	180.989	34.3084	17.1403	3.13687	25.6568	2.58381e-05	15.4844	25.2299	19.3303	0.597357	9.98017	0.113183	4.99037	0.00326251
PB.3108.1	ENSG00000124228	DDX27	ENST00000618172	ISM	135.48	-1.13221	0.485809	-2.33057	0.0197759	0.0540879	Not	DDX27-PB.3108.1-Anno	Annotated	170.676	100.141	19.9801	11.2214	32.731	18.4103	22.6093	15.4977	10.6524	21.8935	2.93949	15.9134	3.87287	11.4879
PB.3108.3	ENSG00000124228	DDX27	ENST00000618172	FSM	430.928	0.608624	0.295323	2.06088	0.0393149	0.0949229	Not	DDX27-PB.3108.3-Anno	Annotated	345.135	521.151	30.323	45.1757	16.9928	43.3403	42.3089	23.1557	25.8172	52.1873	41.843	41.0105	49.5319	41.3059
PB.5270.1	ENSG00000215301	DDX3X	ENST00000646319	FSM	5678.19	-0.614359	0.173662	-3.53767	0.000403674	0.00189259	Not	DDX3X-PB.5270.1-Anno	Annotated	6634.07	4678.1	313.827	215.368	274.849	344.271	272.379	312.23	365.407	153.034	185.487	286.692	201.275	250.353
PB.5270.2	ENSG00000215301	DDX3X	ENST00000644876	FSM	12560.1	-0.805405	0.157063	-5.12791	2.9297e-07	2.83068e-06	Not	DDX3X-PB.5270.2-Anno	Annotated	15454.8	9643	742.935	449.479	590.556	800.284	815.535	660.813	847.488	340.639	371.618	681.907	373.412	479.82
PB.5397.1	ENSG00000067048	DDX3Y	ENST00000336079	FSM	180.375	2.26402	0.804085	2.81564	0.00486798	0.0164005	Up	DDX3Y-PB.5397.1-Anno	Annotated	132.192	221.515	12.8167	22.3636	3.08005	26.2098	0	33.18	1.6137	40.294	24.6986	2.92697	31.3986	12.4999
PB.5397.2	ENSG00000067048	DDX3Y	ENST00000336079	FSM	2401.79	0.0420573	0.44607	0.094284	0.924884	0.955699	Not	DDX3Y-PB.5397.2-Anno	Annotated	2849.77	1807.27	139.72	89.1453	202.714	220.36	4.16623	268.857	2.50169	140.627	162.061	5.81386	123.872	13.352
PB.5397.3	ENSG00000067048	DDX3Y	ENST00000336079	FSM	938.038	-0.253815	0.871615	-0.291201	0.770897	0.86336	Not	DDX3Y-PB.5397.3-Anno	Annotated	1196.17	622.921	105.115	54.4992	178.346	165.3	9.08129	172.846	0	90.2685	101.684	5.99284	72.8518	1.69864
PB.2263.1	ENSG00000198231	DDX42	ENST00000389924	FSM	2124.86	-0.0653297	0.0728405	-0.896887	0.369779	0.527616	Not	DDX42-PB.2263.1-Anno	Annotated	2117	2140.8	121.906	120.139	117.832	117.441	139.331	115.212	119.715	121.628	111.375	132.433	124.752	110.508
PB.4096.1	ENSG00000145833	DDX46	ENST00000452510	FSM	1632.36	0.696164	0.143817	4.84063	1.29427e-06	1.10458e-05	Not	DDX46-PB.4096.1-Anno	Annotated	1208.2	2088	71.5141	120.404	70.9944	77.4628	69.3734	68.9759	70.7639	123.653	99.5098	140.067	104.607	134.184
PB.2262.1	ENSG00000108654	DDX5	ENST00000225792	FSM	9248.4	-0.84995	0.217624	-3.90559	9.39968e-05	0.000525339	Not	DDX5-PB.2262.1-Anno	Annotated	11581.3	6752.32	693.17	394.97	601.555	946.773	512.017	768.057	637.45	326.006	417.139	529.61	352.175	349.921
PB.2262.2	ENSG00000108654	DDX5	novel	NIC	3712.39	-0.917784	0.185748	-4.94101	7.77191e-07	6.91312e-06	Not	DDX5-PB.2262.2-novel	novel	4734.35	2593.15	236.043	126.275	302.131	122.278	222.256	266.882	266.667	148.931	113.645	83.3238	155.321	130.153
PB.2262.3	ENSG00000108654	DDX5	novel	NIC	981.312	-0.186139	0.224059	-0.830758	0.40611	0.564137	Not	DDX5-PB.2262.3-novel	novel	1026.61	931.413	55.7353	49.5073	45.6171	37.9797	74.8444	56.0415	64.1937	59.8107	50.5123	40.3494	48.3355	48.5286
PB.2262.4	ENSG00000108654	DDX5	ENST00000581230	FSM	7600.43	-0.0558882	0.115406	-0.484274	0.628191	0.754112	Not	DDX5-PB.2262.4-Anno	Annotated	7560.88	7703.69	476.345	470.372	525.464	426.214	571.443	473.987	384.614	478.947	419.104	550.706	418.528	484.574
PB.2262.5	ENSG00000108654	DDX5	novel	NIC	1675.98	0.436306	0.232288	1.8783	0.0603408	0.132949	Not	DDX5-PB.2262.5-novel	novel	1422.88	1912.23	82.7898	110.228	42.023	101.921	67.1719	75.3175	127.515	114.362	111.716	82.0786	102.651	140.33
PB.1049.1	ENSG00000110367	DDX6	novel	NNC	2236.59	-0.318507	0.128972	-2.46958	0.0135272	0.0394845	Not	DDX6-PB.1049.1-novel	novel	2416.2	2052.2	269.735	223.171	252.389	313.192	281.848	244.975	256.274	240.218	203.788	258.389	201.969	211.489
PB.3881.1	ENSG00000181381	DDX60L	novel	NIC	252.869	-0.130215	0.222425	-0.585434	0.558256	0.697268	Not	DDX60L-PB.3881.1-novel	novel	256.6	248	23.5968	22.0861	26.0332	13.8051	25.4509	25.6167	27.078	15.6641	21.3343	20.2084	23.921	29.3028
PB.2069.1	ENSG00000140995	DEF8	novel	NIC	203.498	-0.276767	0.21793	-1.26998	0.20409	0.344214	Not	DEF8-PB.2069.1-novel	novel	213.946	192.193	13.852	12.1208	17.8211	11.5223	15.2325	12.3343	12.3498	16.391	6.40707	11.0997	13.9222	12.7839
PB.2069.2	ENSG00000140995	DEF8	ENST00000563795	FSM	160.605	-0.0357192	0.194715	-0.183443	0.85445	0.91013	Not	DEF8-PB.2069.2-Anno	Annotated	157.854	164.007	9.92378	10.034	8.25805	11.783	13.5142	7.77602	8.28762	7.45422	15.0831	9.90963	9.62203	8.10085
PB.504.1	ENSG00000143753	DEGS1	ENST00000323699	FSM	1961.16	0.0886762	0.18055	0.491146	0.623323	0.750212	Not	DEGS1-PB.504.1-Anno	Annotated	1864.14	2064.81	262.297	282.363	271.789	373.3	229.483	211.285	225.627	259.81	262.109	329.364	257.507	303.025
PB.4207.1	ENSG00000124795	DEK	ENST00000652689	FSM	2974.33	0.639203	0.138864	4.60309	4.16264e-06	3.18129e-05	Not	DEK-PB.4207.1-Anno	Annotated	2262.2	3761.4	180.903	292.81	151.658	169.012	188.462	208.516	186.869	249.629	253.489	388.186	273.632	299.114
PB.789.1	ENSG00000119979	DENND10	novel	NIC	75.0687	-0.728806	0.521357	-1.3979	0.162143	0.289341	Not	FAM45A-PB.789.1-novel	novel	89.479	59.3458	11.114	7.28789	8.48313	6.29736	17.2902	10.8097	12.6899	9.06504	5.09319	2.97023	13.5255	5.78549
PB.789.3	ENSG00000119979	DENND10	ENST00000361432	FSM	187.712	0.206282	0.216666	0.952074	0.34106	0.499229	Not	FAM45A-PB.789.3-Anno	Annotated	170.359	209.117	24.7107	28.9728	35.2961	17.06	28.8159	24.353	18.0286	32.3066	26.7118	39.5248	21.4595	24.8613
PB.789.4	ENSG00000119979	DENND10	novel	NIC	77.9438	-0.16121	0.464821	-0.346822	0.728725	0.838015	Not	FAM45A-PB.789.4-novel	novel	79.4575	76.669	11.0219	10.5108	0	16.8609	15.1848	12.2472	10.8169	9.29525e-06	8.79427	12.4332	12.967	18.3594
PB.839.1	ENSG00000166444	DENND2B	ENST00000313726	FSM	1569.33	-0.179181	0.146567	-1.22252	0.221509	0.366474	Not	ST5-PB.839.1-Anno	Annotated	1626.6	1520	83.1007	75.2755	92.2427	71.2812	106.836	64.948	80.1958	71.3182	79.5131	81.7119	86.7763	57.0581
PB.840.1	ENSG00000166444	DENND2B	novel	NIC	1067.28	-0.345299	0.14668	-2.3541	0.0185676	0.0514516	Not	ST5-PB.840.1-novel	novel	1168.06	960.068	69.0322	55.0018	91.6114	50.9744	82.6132	57.9201	62.0419	60.9595	49.8618	46.6115	62.3932	55.1832
PB.282.1	ENSG00000175984	DENND2C	novel	NIC	120.442	-0.33857	0.364919	-0.927796	0.353514	0.511957	Not	DENND2C-PB.282.1-novel	novel	129.941	109.631	12.166	10.0428	12.908	14.1512	15.3292	8.34513	10.0963	12.8006	7.35755	6.31359	10.5527	13.1894
PB.4953.2	ENSG00000137145	DENND4C	ENST00000602925	FSM	1191.42	-0.704434	0.240883	-2.92438	0.00345148	0.0123088	Not	DENND4C-PB.4953.2-Anno	Annotated	1452.72	913.834	48.3101	29.468	65.4598	24.1311	41.8436	60.3045	49.8114	28.6442	30.5549	31.7459	35.7333	20.662
PB.4953.3	ENSG00000137145	DENND4C	ENST00000434457	FSM	1264.91	-0.328739	0.248001	-1.32556	0.184987	0.319837	Not	DENND4C-PB.4953.3-Anno	Annotated	1421.7	1107.23	45.844	34.959	30.1345	74.6759	55.0162	24.3415	45.0521	31.2467	29.6001	43.3055	31.9151	38.7276
PB.1375.1	ENSG00000139726	DENR	ENST00000537955	FSM	634.354	-0.00513649	0.152973	-0.0335777	0.973214	0.985479	Not	DENR-PB.1375.1-Anno	Annotated	621.7	648.391	49.4792	49.8491	66.1739	39.563	59.6479	39.1325	42.8789	51.4051	43.3847	46.0777	53.4024	54.9754
PB.190.1	ENSG00000024526	DEPDC1	ENST00000370966	FSM	251.387	2.84673	0.288237	9.87635	5.27166e-23	3.0775e-21	Up	DEPDC1-PB.190.1-Anno	Annotated	58.4	460.8	2.90357	22.1267	3.58996	3.15788	2.33248	2.83158	2.60592	16.5762	16.7545	30.6511	19.1545	27.4973
PB.4890.1	ENSG00000136986	DERL1	ENST00000259512	FSM	1714.82	0.115069	0.121338	0.948331	0.342961	0.501168	Not	DERL1-PB.4890.1-Anno	Annotated	1603.8	1843	119.194	133.116	124.223	139.68	120.385	114.963	96.7166	127.48	132.043	164.916	121.591	119.552
PB.2094.1	ENSG00000072849	DERL2	ENST00000158771	FSM	1027.44	-0.04855	0.0785669	-0.617945	0.536611	0.680867	Not	DERL2-PB.2094.1-Anno	Annotated	1020.31	1040.4	54.4492	53.7861	64.4013	45.6922	64.9689	47.9737	49.2099	56.6905	48.5757	57.5485	51.1869	54.9288
PB.549.1	ENSG00000121644	DESI2	ENST00000302550	FSM	1327.22	0.38062	0.0960776	3.96159	7.44531e-05	0.000427635	Not	DESI2-PB.549.1-Anno	Annotated	1121.4	1556.2	61.0504	82.139	68.3267	60.1913	65.156	57.9886	53.5894	80.0331	75.7282	101.017	76.0992	77.8171
PB.30.1	ENSG00000160049	DFFA	ENST00000377038	FSM	346.999	0.0713967	0.119291	0.598507	0.549502	0.69194	Not	DFFA-PB.30.1-Anno	Annotated	328.382	366.114	48.5781	52.5926	53.1599	44.5009	44.9144	44.6275	55.6877	59.0066	44.0174	53.9181	52.2998	53.7209
PB.3188.1	ENSG00000070413	DGCR2	ENST00000263196	FSM	1050.1	-0.650764	0.108121	-6.01886	1.75649e-09	2.50561e-08	Not	DGCR2-PB.3188.1-Anno	Annotated	1248.6	840.4	62.3919	40.8523	72.2589	63.368	68.2746	49.3966	58.6614	43.0973	43.2623	40.0953	44.5898	33.2169
PB.3191.1	ENSG00000128191	DGCR8	ENST00000351989	FSM	693.595	0.271983	0.0695856	3.90862	9.28265e-05	0.000519634	Not	DGCR8-PB.3191.1-Anno	Annotated	611.2	780.2	30.2134	37.4625	35.796	27.9834	31.7128	25.2129	30.3617	42.206	34.9172	37.0756	34.1641	38.9498
PB.160.1	ENSG00000116133	DHCR24	ENST00000371269	FSM	1553.09	-0.16851	0.306299	-0.550148	0.582218	0.716124	Not	DHCR24-PB.160.1-Anno	Annotated	1717.43	1360.36	88.8656	69.4938	76.5831	194.195	58.9273	41.1432	73.4798	74.3458	65.6857	69.9736	68.9644	68.4996
PB.160.2	ENSG00000116133	DHCR24	ENST00000371269	FSM	160.571	-5.88023	1.80771	-3.25287	0.00114247	0.00470566	Down	DHCR24-PB.160.2-Anno	Annotated	262.574	49.8376	17.3595	3.28142	40.3715	27.4401	10.0522	8.49309	0.440536	3.30824	8.96967e-07	0	13.0989	0
PB.74.1	ENSG00000117682	DHDDS	ENST00000236342	FSM	507.776	-0.0524421	0.152753	-0.343312	0.731364	0.840134	Not	DHDDS-PB.74.1-Anno	Annotated	507.562	513.411	35.3792	34.4779	46.5002	29.4824	48.7792	24.7986	27.3354	40.5779	39.0606	37.1118	32.3357	23.3033
PB.74.2	ENSG00000117682	DHDDS	ENST00000525682	FSM	94.0123	0.596836	0.533663	1.11838	0.263406	0.41664	Not	DHDDS-PB.74.2-Anno	Annotated	73.7279	113.334	5.27531	7.95781	4.11439	4.37498	7.34011	2.04712	8.49995	8.46567	7.61461	2.89191	9.84148	10.9754
PB.74.3	ENSG00000117682	DHDDS	ENST00000487944	ISM	287.388	-0.145085	0.212466	-0.682863	0.494693	0.642722	Not	DHDDS-PB.74.3-Anno	Annotated	293.91	280.252	36.5925	33.8223	43.5171	31.0299	48.1108	30.4392	29.8654	41.9804	30.8446	26.2344	32.6035	37.4484
PB.71.1	ENSG00000225891	DHDDS-AS1	novel	NIC	206.425	-0.218643	0.251386	-0.86975	0.384437	0.542102	Not	RP3-476K8.3-PB.71.1-novel	novel	218.198	193.817	19.7642	16.9605	26.9906	12.9343	26.4563	14.4283	18.0114	21.1018	15.382	12.6256	17.791	17.9021
PB.4012.1	ENSG00000228716	DHFR	ENST00000439211	FSM	700.599	1.35201	0.125806	10.7468	6.13642e-27	5.07497e-25	Not	DHFR-PB.4012.1-Anno	Annotated	384.786	1053.73	30.8283	80.7664	36.0794	21.175	42.4575	23.9188	30.5109	66.4105	67.2244	119.411	66.4741	84.3126
PB.3453.1	ENSG00000178700	DHFR2	ENST00000314636	FSM	56.4561	-0.305143	0.433206	-0.704384	0.481194	0.630608	Not	DHFR2-PB.3453.1-Anno	Annotated	69.132	47.0462	5.07988	3.30142	1.29042	6.33055	14.2304	2.13081	1.41721	1.91896	4.48706	6.82177	1.62234	1.65698
PB.3453.2	ENSG00000178700	DHFR2	ENST00000394221	FSM	258.855	-0.456443	0.299957	-1.52169	0.128086	0.240836	Not	DHFR2-PB.3453.2-Anno	Annotated	290.221	223.092	22.5355	16.8022	31.648	13.1386	25.5168	18.4889	23.8854	17.8439	17.362	9.19914	21.5245	18.0816
PB.577.2	ENSG00000181192	DHTKD1	ENST00000263035	FSM	50.4256	-6.06849	1.89868	-3.19615	0.00139273	0.00559915	Down	DHTKD1-PB.577.2-Anno	Annotated	80.0553	17.8767	5.77345	1.28237	11.646	3.9587e-07	1.71339	5.03599	10.4719	6.40423	0	7.47841e-05	1.80085e-08	0.00753833
PB.577.1	ENSG00000181192	DHTKD1	ENST00000263035	FSM	287.086	-0.0143863	0.187439	-0.0767521	0.938821	0.964648	Not	DHTKD1-PB.577.1-Anno	Annotated	283.924	292.077	18.4307	18.4358	18.0665	22.0748	25.4167	14.2436	12.3517	14.4562	21.0442	19.4923	21.6714	15.5147
PB.3689.1	ENSG00000109606	DHX15	ENST00000336812	FSM	3388.59	0.143661	0.192424	0.746587	0.455313	0.608397	Not	DHX15-PB.3689.1-Anno	Annotated	3141.6	3663.8	235.901	268.455	218.896	306.188	199.999	231.852	222.567	259.301	235.754	343.924	237.443	265.852
PB.3956.1	ENSG00000067248	DHX29	ENST00000251636	FSM	958.185	0.546979	0.0854641	6.4001	1.55272e-10	2.58057e-09	Not	DHX29-PB.3956.1-Anno	Annotated	757.2	1179.6	37.4833	56.6946	35.527	35.7204	43.9905	33.8368	38.3419	51.9147	49.7896	68.9517	50.1965	62.6203
PB.3391.1	ENSG00000132153	DHX30	ENST00000445061	FSM	321.22	0.535326	0.260957	2.05139	0.0402287	0.0965074	Not	DHX30-PB.3391.1-Anno	Annotated	267.581	382.6	15.415	21.4364	9.31231	10.1169	26.5186	12.7241	18.4031	21.6088	21.7974	24.5622	19.6688	19.5448
PB.3391.3	ENSG00000132153	DHX30	ENST00000457607	FSM	342.978	0.129948	0.235606	0.551549	0.581258	0.715621	Not	DHX30-PB.3391.3-Anno	Annotated	324.014	366.659	19.4968	21.0825	34.5341	15.089	16.627	12.7778	18.456	22.6405	14.8809	27.3734	22.0945	18.4234
PB.3391.2	ENSG00000132153	DHX30	novel	NIC	73.8509	5.42158	1.51745	3.57282	0.000353161	0.00168735	Up	DHX30-PB.3391.2-novel	novel	50.6042	94.7409	2.87896	5.6513	0	12.5148	0	1.88	0	11.3807	6.40868	1.67878	6.84448	1.94383
PB.2571.1	ENSG00000134815	DHX34	ENST00000328771	FSM	295.444	0.137327	0.168525	0.814877	0.415143	0.571792	Not	DHX34-PB.2571.1-Anno	Annotated	273.4	319.2	15.3786	17.5189	16.1373	17.4334	17.6702	11.5817	14.0705	23.5033	17.0036	17.7049	15.606	13.7768
PB.3085.1	ENSG00000101452	DHX35	ENST00000252011	FSM	244.025	-0.246178	0.168829	-1.45815	0.144799	0.264855	Not	DHX35-PB.3085.1-Anno	Annotated	258.6	230	17.6303	15.2714	17.9036	13.5976	23.3124	15.9945	17.3435	18.2856	12.3268	15.6494	17.1355	12.9595
PB.2035.1	ENSG00000140829	DHX38	ENST00000268482	FSM	1223.31	-0.0264029	0.0619921	-0.425907	0.670175	0.789772	Not	DHX38-PB.2035.1-Anno	Annotated	1202	1252.6	62.361	63.089	69.6795	60.3081	69.4832	55.4157	56.9184	68.343	60.5253	71.9209	58.6636	55.9925
PB.2683.1	ENSG00000163214	DHX57	ENST00000457308	FSM	468.374	0.279852	0.139742	2.00264	0.0452162	0.105906	Not	DHX57-PB.2683.1-Anno	Annotated	416	526.8	18.8715	23.1698	19.1345	13.377	23.981	15.4567	22.4085	24.7666	22.1053	25.2321	20.873	22.872
PB.2201.1	ENSG00000067596	DHX8	ENST00000262415	FSM	1061.52	0.0966499	0.125224	0.771818	0.440222	0.594985	Not	DHX8-PB.2201.1-Anno	Annotated	997.8	1138.6	52.309	57.9573	54.7456	57.6155	56.37	45.5303	47.2835	59.1776	49.5774	73.4902	51.3761	56.1651
PB.422.1	ENSG00000135829	DHX9	ENST00000367549	FSM	4292.23	0.0850547	0.245835	0.345983	0.729356	0.838463	Not	DHX9-PB.422.1-Anno	Annotated	4053.62	4572.3	209.513	229.978	221.039	269.603	145.009	219.77	192.143	209.293	201.993	326.274	202.25	210.081
PB.1683.1	ENSG00000100697	DICER1	ENST00000343455	FSM	2292.53	0.171313	0.0887806	1.92963	0.0536533	0.121173	Not	DICER1-PB.1683.1-Anno	Annotated	2111.8	2495.8	74.426	85.5533	72.7594	69.0112	95.4246	60.3608	74.5742	88.1003	81.6736	91.0101	80.8481	86.1345
PB.3130.1	ENSG00000101191	DIDO1	ENST00000370371	FSM	804.267	-0.145414	0.119145	-1.22048	0.222283	0.367055	Not	DIDO1-PB.3130.1-Anno	Annotated	822.6	787.2	66.6179	62.1292	64.3408	68.2897	77.7	58.0977	64.6614	72.0422	55.0933	65.9611	58.3064	59.2432
PB.232.1	ENSG00000154511	DIPK1A	novel	NIC	125.089	-1.5483	0.413486	-3.7445	0.000180756	0.000931537	Not	FAM69A-PB.232.1-novel	novel	181.2	66	28.3834	9.93861	43.2058	15.8511	38.0235	21.6342	23.2025	8.25815	10.4166	6.78045	17.1422	7.09566
PB.3563.1	ENSG00000181744	DIPK2A	ENST00000315691	FSM	933.808	-1.82154	0.289412	-6.29394	3.09513e-10	4.95435e-09	Not	C3orf58-PB.3563.1-Anno	Annotated	1367.19	479.849	74.4977	25.6117	92.9461	70.6149	90.8102	84.9624	33.1547	38.0327	28.6588	23.6668	34.0839	3.61629
PB.3563.2	ENSG00000181744	DIPK2A	ENST00000315691	FSM	1107.45	-0.946929	0.312892	-3.02637	0.00247507	0.00923432	Not	C3orf58-PB.3563.2-Anno	Annotated	1417.01	757.751	77.4804	40.4467	84.6974	96.3496	29.8495	93.1814	83.324	21.4383	54.3888	40.6342	38.5026	47.2698
PB.1481.1	ENSG00000083520	DIS3	ENST00000377767	FSM	398.987	2.19918	1.09389	2.01043	0.0443861	0.104278	Not	DIS3-PB.1481.1-Anno	Annotated	218.687	609.073	12.4741	34.0704	0.00442596	20.2731	23.8439	13.5485	4.70066	11.0429	20.4528	64.0273	39.0926	35.7361
PB.1481.2	ENSG00000083520	DIS3	ENST00000377780	FSM	258.849	-0.634467	0.215678	-2.94173	0.00326385	0.0117239	Not	DIS3-PB.1481.2-Anno	Annotated	306.608	210.531	18.5021	12.2806	22.1122	12.4677	25.1312	11.7233	21.0761	19.3119	11.298	12.1768	7.60482	11.0115
PB.1481.3	ENSG00000083520	DIS3	ENST00000377767	FSM	805.173	-0.396488	0.255614	-1.55112	0.120873	0.230561	Not	DIS3-PB.1481.3-Anno	Annotated	867.705	729.396	51.1718	42.3117	49.356	62.4965	45.3469	51.0315	47.6279	67.4265	43.2528	32.7767	23.3092	44.7934
PB.1818.1	ENSG00000166938	DIS3L	ENST00000319212	FSM	1028.1	-0.264942	0.148732	-1.78134	0.0748571	0.157969	Not	DIS3L-PB.1818.1-Anno	Annotated	1097.91	955.819	64.646	54.7842	66.9011	51.762	84.5685	54.2693	65.7288	55.8998	52.9227	48.7504	62.4562	53.8922
PB.1818.4	ENSG00000166938	DIS3L	novel	NIC	18.71	-1.34298	0.704908	-1.90519	0.0567559	0.126942	Not	DIS3L-PB.1818.4-novel	novel	25.9712	11.7363	1.60801	0.696814	2.68212	0.944846	1.68549	1.70585	1.02177	0.269751	0.555166	0.915372	1.32616	0.417617
PB.1033.2	ENSG00000150764	DIXDC1	ENST00000615255	FSM	656.408	-1.63484	0.173392	-9.4286	4.15607e-21	2.04768e-19	Not	DIXDC1-PB.1033.2-Anno	Annotated	970.171	330.635	43.577	14.4083	51.8268	29.0301	57.8107	42.3773	36.8404	11.5462	11.8868	14.9374	21.0047	12.6667
PB.5389.1	ENSG00000130826	DKC1	ENST00000369550	FSM	576.658	0.518041	0.214121	2.41938	0.0155469	0.0441917	Not	DKC1-PB.5389.1-Anno	Annotated	461.2	704.4	68.448	101.784	58.6706	85.4493	66.3692	58.1065	73.6444	110.489	77.1006	133.161	85.0632	103.108
PB.643.1	ENSG00000107984	DKK1	ENST00000373970	FSM	189.864	-0.587148	0.320806	-1.83023	0.0672163	0.144567	Not	DKK1-PB.643.1-Anno	Annotated	216	163.6	13.1009	9.68081	10.6319	14.2268	15.1259	12.8513	12.6689	8.64217	12.9971	12.364	10.9756	3.42524
PB.860.1	ENSG00000050165	DKK3	ENST00000326932	FSM	217.952	-0.772526	0.333541	-2.31614	0.0205507	0.0557244	Not	DKK3-PB.860.1-Anno	Annotated	273.159	159.256	23.69	13.1675	45.8029	15.5609	21.2221	21.8993	13.9649	10.4399	17.0183	12.3711	15.3908	10.6175
PB.860.2	ENSG00000050165	DKK3	ENST00000683431	FSM	1246.59	-0.644755	0.189025	-3.41095	0.000647374	0.0028903	Not	DKK3-PB.860.2-Anno	Annotated	1473.44	1004.94	134.102	88.7521	156.715	132.262	157.698	135.671	88.1641	62.0983	113.506	79.7223	109.79	78.6438
PB.1034.1	ENSG00000150768	DLAT	ENST00000280346	FSM	216.427	0.571268	0.203392	2.80871	0.00497407	0.0167255	Not	DLAT-PB.1034.1-Anno	Annotated	173.001	264.302	11.5187	17.21	8.76086	10.3467	17.644	12.1781	8.66407	17.3885	14.792	18.5414	20.3173	15.0107
PB.1034.2	ENSG00000150768	DLAT	ENST00000280346	FSM	2.30528	0.0714304	3.10215	0.023026	0.981629	0.989033	Not	DLAT-PB.1034.2-Anno	Annotated	1.99969	3.24762	0.12707	0.184661	0	0	0.635179	0.000170918	2.09349e-09	0	0	0.923305	0	0
PB.1034.3	ENSG00000150768	DLAT	ENST00000280346	FSM	298.743	0.337683	0.344347	0.980649	0.326766	0.484844	Not	DLAT-PB.1034.3-Anno	Annotated	257.188	346.689	19.029	24.6155	30.8985	22.7983	11.4132	11.7065	18.3284	29.7074	21.357	37.1085	21.6098	13.2946
PB.1034.5	ENSG00000150768	DLAT	ENST00000280346	FSM	237.656	1.03666	0.18488	5.60719	2.05635e-08	2.54643e-07	Not	DLAT-PB.1034.5-Anno	Annotated	150.411	331.361	9.13842	19.463	10.7994	8.47135	7.83169	7.38715	11.2025	18.5054	15.2035	23.2848	15.1935	25.1278
PB.4723.1	ENSG00000164741	DLC1	ENST00000358919	FSM	3872.17	-0.0727072	0.249522	-0.291386	0.770756	0.86336	Not	DLC1-PB.4723.1-Anno	Annotated	3850.39	3906.54	225.663	220.57	306.594	175.676	167.303	232.761	245.979	175.386	264.882	279.263	212.269	171.048
PB.4723.2	ENSG00000164741	DLC1	ENST00000512044	FSM	728.844	-1.16438	0.272863	-4.26728	1.97867e-05	0.000129923	Not	DLC1-PB.4723.2-Anno	Annotated	977.233	481.836	58.9583	27.6289	78.896	39.364	77.3207	45.1043	54.1066	15.4711	33.1575	43.5548	23.7666	22.1948
PB.4723.3	ENSG00000164741	DLC1	novel	NIC	166.247	0.36956	0.238477	1.54967	0.12122	0.230907	Not	DLC1-PB.4723.3-novel	novel	140.752	196.115	8.69876	11.6968	5.73485	6.15199	12.7119	7.59441	11.3006	5.55355	14.2663	15.6755	9.5473	13.4415
PB.4723.4	ENSG00000164741	DLC1	ENST00000520226	ISM	92.9877	1.72493	2.71458	0.635431	0.525147	0.669517	Not	DLC1-PB.4723.4-Anno	Annotated	41.0278	152.591	3.88673	13.5078	9.65704	9.77658	0	0	8.68861e-07	9.86008	0.305573	27.5496	0	29.8237
PB.4723.5	ENSG00000164741	DLC1	ENST00000520226	ISM	1.40642	0.758363	3.1063	0.244137	0.807125	0.883234	Not	DLC1-PB.4723.5-Anno	Annotated	0	2.70836	0	0.261559	0	0	0	0	0	0	0	1.67009e-05	0	1.30778
PB.4723.6	ENSG00000164741	DLC1	ENST00000520226	ISM	14.8701	2.21626	3.04699	0.72736	0.467005	0.618437	Not	DLC1-PB.4723.6-Anno	Annotated	0	31.4091	0	3.14731	0	0	0	0	0	0	0	5.62554	0	10.111
PB.4616.1	ENSG00000091140	DLD	ENST00000205402	FSM	786.314	0.680936	0.116773	5.83128	5.50044e-09	7.4778e-08	Not	DLD-PB.4616.1-Anno	Annotated	586.409	1010.1	36.7561	60.9245	43.4004	31.0676	40.6493	28.9443	39.7189	54.4503	53.9192	82.5679	50.884	62.8009
PB.4616.2	ENSG00000091140	DLD	novel	NIC	238.515	0.181477	0.185339	0.979162	0.3275	0.485519	Not	DLD-PB.4616.2-novel	novel	217.591	260.497	13.9248	16.1619	16.4678	9.31166	17.4648	12.2373	14.1423	15.6954	12.326	14.2799	17.8524	20.6559
PB.3078.1	ENSG00000080845	DLGAP4	ENST00000475894	FSM	132.421	0.149426	0.299874	0.498296	0.618275	0.746465	Not	DLGAP4-PB.3078.1-Anno	Annotated	120.884	142.41	18.0029	20.7602	16.9606	19.4563	9.93895	20.5827	23.0758	20.374	15.0382	17.4697	16.924	33.9951
PB.3078.2	ENSG00000080845	DLGAP4	ENST00000340491	FSM	2127.68	-0.319453	0.0540376	-5.91168	3.38628e-09	4.69551e-08	Not	DLGAP4-PB.3078.2-Anno	Annotated	2295.54	1938.61	136.899	112.596	175.124	142.282	124.133	133.506	109.449	126.765	122.457	104.197	118.889	90.6727
PB.3078.3	ENSG00000080845	DLGAP4	ENST00000340491	FSM	1177.78	-1.34216	0.360342	-3.72468	0.000195567	0.00100192	Not	DLGAP4-PB.3078.3-Anno	Annotated	1603.98	722.38	159.718	68.9822	308.948	133.056	135.449	107.544	113.591	60.9695	80.4553	63.1779	120.207	20.1016
PB.1654.1	ENSG00000119689	DLST	ENST00000334220	FSM	1667.59	0.207743	0.095888	2.16651	0.0302719	0.076815	Not	DLST-PB.1654.1-Anno	Annotated	1502.4	1857.4	122.302	146.289	135.055	115.027	131.125	107.912	122.392	132.256	134.349	184.45	145.688	134.701
PB.2563.1	ENSG00000104936	DMPK	ENST00000683086	FSM	862.746	-0.489431	0.142719	-3.42932	0.000605095	0.00272501	Not	DMPK-PB.2563.1-Anno	Annotated	984.522	734.149	84.8239	60.9816	122.625	74.4761	83.7617	77.4049	65.8513	57.3688	65.6084	62.9784	65.0712	53.8813
PB.2737.1	ENSG00000243667	DNAAF10	ENST00000295121	FSM	301.432	-0.251678	0.13839	-1.81861	0.068971	0.14761	Not	WDR92-PB.2737.1-Anno	Annotated	317.764	283.277	52.1376	45.0344	60.8709	39.4243	61.1132	49.3423	49.9372	53.7888	39.5896	42.3801	51.3995	38.0138
PB.4427.2	ENSG00000164818	DNAAF5	novel	NIC	9.79609	5.75796	1.99055	2.89264	0.00382013	0.0133691	Up	DNAAF5-PB.4427.2-novel	novel	2.63229	17.3845	0.218569	1.38333	0	0	1.09284	0	0	1.62952	1.55034	0.861799	1.28054	1.59443
[truncated: 5,327 more rows]

## Sheet: Table S3.2
Table S3.2 Differential isoform expression in keratinocytes at post-wound day 7 compared with normal skin.
[truncated: 6,263 more rows]
