# Supplementary material
Source: Research Square preprint supplement (doi:10.21203/rs.3.rs-9917999/v1)
Supplement: Supplementary file 6 [file 1aa430e94c62e92794783ad9.xlsx]

## Sheet: Table S8.1
Table S8.1 PSI marker features identified between post-wound day 7 and normal skin across all cell types.
Psi_Gene	GeneName	p_val	avg_log2FC	pct.1	pct.2	p_val_adj	avg_acute	avg_healthy	diff	Group	celltypes
TM4SF19-DYNLT2B	TM4SF19-DYNLT2B	6.63049e-42	5.92271	1	1	4.50873e-38	0.707909	0.00704107	0.700868	acute_vs_healthy	Basal-cell
SLC28A3	SLC28A3	6.63049e-42	7.40198	1	1	4.50873e-38	0.99977	0.000123641	0.999647	acute_vs_healthy	Basal-cell
XPR1	XPR1	1.01642e-41	0.998605	1	1	6.91164e-38	0.999517	0.617903	0.381614	acute_vs_healthy	Basal-cell
ENSG00000235978.AS2	ENSG00000235978	1.78108e-41	7.35749	1	1	1.21113e-37	0.980255	0.000123645	0.980132	acute_vs_healthy	Basal-cell
LRP8	LRP8	2.29319e-41	-0.847375	1	1	1.55937e-37	0.665624	0.999657	-0.334033	acute_vs_healthy	Basal-cell
PHKA1.AS2	PHKA1	2.67967e-41	7.4021	1	1	1.82217e-37	0.999813	0.000123445	0.999689	acute_vs_healthy	Basal-cell
TBC1D31	TBC1D31	2.79683e-41	0.970733	1	1	1.90184e-37	0.988631	0.61816	0.370471	acute_vs_healthy	Basal-cell
SH3TC1.AS4	SH3TC1	4.91395e-41	6.17957	1	1	3.34148e-37	0.999209	0.0136424	0.985567	acute_vs_healthy	Basal-cell
GLIPR1.AS2	GLIPR1	6.78451e-41	1.46695	1	1	4.61347e-37	0.999097	0.47842	0.520676	acute_vs_healthy	Basal-cell
CCDC18	CCDC18	7.72939e-41	-1.38473	1	1	5.25599e-37	0.487219	0.980892	-0.493673	acute_vs_healthy	Basal-cell
GK.AS4	GK	8.44926e-41	2.03064	1	1	5.7455e-37	0.994802	0.343395	0.651407	acute_vs_healthy	Basal-cell
TP53INP2	TP53INP2	9.90302e-41	5.55683	1	1	6.73406e-37	0.849456	0.0186439	0.830812	acute_vs_healthy	Basal-cell
CNGB1	CNGB1	1.13724e-40	7.40211	1	1	7.73322e-37	0.999815	0.000123458	0.999692	acute_vs_healthy	Basal-cell
AVL9	AVL9	1.13736e-40	1.09021	1	1	7.73408e-37	0.998835	0.587622	0.411213	acute_vs_healthy	Basal-cell
TBC1D31.AS4	TBC1D31	1.28011e-40	2.42236	1	1	8.70473e-37	0.997776	0.267582	0.730193	acute_vs_healthy	Basal-cell
ATR	ATR	1.28025e-40	-0.794223	1	1	8.70568e-37	0.683641	0.998255	-0.314614	acute_vs_healthy	Basal-cell
TMEM164	TMEM164	1.40579e-40	-4.10372	1	1	9.55939e-37	0.085036	0.999718	-0.914682	acute_vs_healthy	Basal-cell
TREM1	TREM1	1.4126e-40	-1.5218	1	1	9.60569e-37	0.463537	0.999578	-0.536041	acute_vs_healthy	Basal-cell
PTGER3	PTGER3	1.47322e-40	-1.62415	1	1	1.00179e-36	0.427164	0.983712	-0.556548	acute_vs_healthy	Basal-cell
SBF2.AS4	SBF2	1.87578e-40	-1.54845	1	1	1.27553e-36	0.454191	0.998582	-0.544391	acute_vs_healthy	Basal-cell
CDKN2A	CDKN2A	2.65424e-40	6.52495	1	1	1.80489e-36	0.657473	0.000123464	0.65735	acute_vs_healthy	Basal-cell
CYP4F11	CYP4F11	3.88331e-40	1.8392	1	1	2.64065e-36	0.998082	0.386341	0.611741	acute_vs_healthy	Basal-cell
SPECC1.AS2	SPECC1	3.88331e-40	1.91089	1	1	2.64065e-36	0.999656	0.367154	0.632502	acute_vs_healthy	Basal-cell
YAP1	YAP1	3.99532e-40	6.66492	1	1	2.71682e-36	0.998828	0.00689191	0.991936	acute_vs_healthy	Basal-cell
SENP5.AS2	SENP5	7.67808e-40	1.22268	1	1	5.22109e-36	0.993467	0.542632	0.450835	acute_vs_healthy	Basal-cell
ADGRE5	ADGRE5	8.90037e-40	6.56897	1	1	6.05225e-36	0.981292	0.00756051	0.973732	acute_vs_healthy	Basal-cell
TMPRSS11D	TMPRSS11D	8.90037e-40	3.99804	1	1	6.05225e-36	0.998209	0.0933636	0.904846	acute_vs_healthy	Basal-cell
NEMP1.AS2	NEMP1	1.25165e-39	1.99601	1	1	8.51122e-36	0.87784	0.294024	0.583816	acute_vs_healthy	Basal-cell
PAPLN	PAPLN	1.26952e-39	0.824471	1	1	8.63274e-36	0.998951	0.667532	0.331419	acute_vs_healthy	Basal-cell
ENSG00000291102	ENSG00000291102	1.68895e-39	5.44632	1	1	1.14849e-35	0.353747	0.000123399	0.353623	acute_vs_healthy	Basal-cell
ERG.AS3	ERG	2.37336e-39	-1.61292	1	1	1.61389e-35	0.437428	0.999856	-0.562428	acute_vs_healthy	Basal-cell
PPP1R3B-DT.AS3	PPP1R3B-DT	2.60802e-39	5.31596	1	1	1.77346e-35	0.946593	0.0225384	0.924055	acute_vs_healthy	Basal-cell
ALKBH8	ALKBH8	3.00494e-39	0.82367	1	1	2.04336e-35	0.999814	0.673878	0.325936	acute_vs_healthy	Basal-cell
ADAP2.AS3	ADAP2	3.71062e-39	0.892132	1	1	2.52322e-35	0.985525	0.64406	0.341465	acute_vs_healthy	Basal-cell
NLGN4Y	NLGN4Y	4.23587e-39	0.778493	1	1	2.88039e-35	0.984565	0.677494	0.307071	acute_vs_healthy	Basal-cell
DBF4B.AS2	DBF4B	4.46809e-39	1.69128	1	1	3.0383e-35	0.987057	0.413968	0.573089	acute_vs_healthy	Basal-cell
CLHC1.AS2	CLHC1	5.06991e-39	-1.59966	1	1	3.44754e-35	0.427131	0.981022	-0.55389	acute_vs_healthy	Basal-cell
STK39	STK39	5.40344e-39	1.8111	1	1	3.67434e-35	0.993552	0.390536	0.603017	acute_vs_healthy	Basal-cell
RAD54L.AS4	RAD54L	5.40344e-39	5.71584	1	1	3.67434e-35	0.996492	0.0223799	0.974113	acute_vs_healthy	Basal-cell
PLOD2.AS4	PLOD2	5.89967e-39	0.926569	1	1	4.01178e-35	0.916317	0.580407	0.33591	acute_vs_healthy	Basal-cell
SKA3	SKA3	7.43828e-39	1.01615	1	1	5.05803e-35	0.976175	0.598011	0.378165	acute_vs_healthy	Basal-cell
FANCM.AS9	FANCM	2.00504e-38	1.54737	1	1	1.36343e-34	0.594521	0.24215	0.35237	acute_vs_healthy	Basal-cell
ENSG00000291147.AS2	ENSG00000291147	2.18547e-38	1.0977	1	1	1.48612e-34	0.83691	0.472931	0.363979	acute_vs_healthy	Basal-cell
RASGEF1B.AS2	RASGEF1B	2.62487e-38	-1.14877	1	1	1.78491e-34	0.548768	0.979031	-0.430263	acute_vs_healthy	Basal-cell
MPHOSPH9	MPHOSPH9	2.77273e-38	-1.94486	1	1	1.88545e-34	0.34506	0.997093	-0.652033	acute_vs_healthy	Basal-cell
MAP2	MAP2	2.78029e-38	2.17133	1	1	1.8906e-34	0.932332	0.288545	0.643787	acute_vs_healthy	Basal-cell
ADGRE2	ADGRE2	3.49232e-38	-4.05626	1	1	2.37478e-34	0.0876168	0.995755	-0.908138	acute_vs_healthy	Basal-cell
FOCAD.AS2	FOCAD	4.90507e-38	1.98064	1	1	3.33545e-34	0.982926	0.342194	0.640731	acute_vs_healthy	Basal-cell
ATF7IP2.AS2	ATF7IP2	6.90483e-38	-3.67074	1	1	4.69529e-34	0.0881237	0.838001	-0.749877	acute_vs_healthy	Basal-cell
ODF2L.AS4	ODF2L	7.10338e-38	-0.770029	1	1	4.8303e-34	0.678375	0.999762	-0.321387	acute_vs_healthy	Basal-cell
GOLIM4	GOLIM4	7.12651e-38	-2.5309	1	1	4.84602e-34	0.229182	0.98895	-0.759767	acute_vs_healthy	Basal-cell
CEMIP2	CEMIP2	9.36095e-38	-1.53711	1	1	6.36544e-34	0.320079	0.75394	-0.433861	acute_vs_healthy	Basal-cell
CLEC7A	CLEC7A	1.46756e-37	-4.027	1	1	9.9794e-34	0.0836692	0.999839	-0.91617	acute_vs_healthy	Basal-cell
MAT1A	MAT1A	1.61807e-37	-1.41011	1	1	1.10029e-33	0.481714	0.999623	-0.517909	acute_vs_healthy	Basal-cell
C12orf56	C12orf56	1.62155e-37	7.40216	1	1	1.10265e-33	0.999847	0.000123621	0.999723	acute_vs_healthy	Basal-cell
MACF1.AS8	MACF1	1.93752e-37	1.82415	1	1	1.31751e-33	0.982334	0.374299	0.608035	acute_vs_healthy	Basal-cell
SLK	SLK	2.18217e-37	1.4033	1	1	1.48388e-33	0.978906	0.483006	0.4959	acute_vs_healthy	Basal-cell
ZNF502	ZNF502	2.28113e-37	-5.30765	1	1	1.55117e-33	0.0270682	0.926294	-0.899226	acute_vs_healthy	Basal-cell
DYRK3	DYRK3	2.50716e-37	-6.77717	1	1	1.70487e-33	0.000168476	0.825708	-0.82554	acute_vs_healthy	Basal-cell
NIPAL1	NIPAL1	6.66897e-37	0.966175	1	1	4.5349e-33	0.977684	0.611746	0.365938	acute_vs_healthy	Basal-cell
ENSG00000246090	ENSG00000246090	7.17057e-37	-2.27132	1	1	4.87599e-33	0.284227	0.998104	-0.713877	acute_vs_healthy	Basal-cell
BEST1	BEST1	1.08942e-36	2.43627	1	1	7.40804e-33	0.676597	0.152863	0.523734	acute_vs_healthy	Basal-cell
PTPN20.AS5	PTPN20	1.09774e-36	2.46582	1	1	7.46464e-33	0.933093	0.233793	0.699299	acute_vs_healthy	Basal-cell
SCAI.AS2	SCAI	2.00149e-36	-3.72914	1	1	1.36101e-32	0.0968679	0.951515	-0.854647	acute_vs_healthy	Basal-cell
RUBCN.AS2	RUBCN	2.00754e-36	-6.44354	1	1	1.36513e-32	0.00297625	0.811022	-0.808045	acute_vs_healthy	Basal-cell
RALGPS1	RALGPS1	2.50068e-36	2.86805	1	1	1.70046e-32	0.920742	0.181935	0.738807	acute_vs_healthy	Basal-cell
IGF2BP2	IGF2BP2	2.90252e-36	3.77802	1	1	1.97372e-32	0.689132	0.0554854	0.633647	acute_vs_healthy	Basal-cell
ZFP90	ZFP90	3.57125e-36	2.14443	1	1	2.42845e-32	0.865126	0.257899	0.607227	acute_vs_healthy	Basal-cell
KANSL1	KANSL1	3.64923e-36	-5.05599	1	1	2.48148e-32	0.0239144	0.98556	-0.961645	acute_vs_healthy	Basal-cell
SNRK.AS2	SNRK	8.22441e-36	1.51432	1	1	5.5926e-32	0.961913	0.435894	0.52602	acute_vs_healthy	Basal-cell
AADACL2	AADACL2	8.99588e-36	-2.53496	1	1	6.1172e-32	0.175743	0.791175	-0.615432	acute_vs_healthy	Basal-cell
CCDC77	CCDC77	1.27324e-35	-3.33856	1	1	8.65803e-32	0.134983	0.980079	-0.845096	acute_vs_healthy	Basal-cell
PRELID3A.AS2	PRELID3A	1.99572e-35	-3.8359	1	1	1.35709e-31	0.0951623	0.988187	-0.893025	acute_vs_healthy	Basal-cell
TLK2.AS8	TLK2	2.21454e-35	1.29157	1	1	1.50589e-31	0.892686	0.462417	0.430269	acute_vs_healthy	Basal-cell
TMEM263	TMEM263	2.48921e-35	-2.05533	1	1	1.69266e-31	0.324911	0.979835	-0.654924	acute_vs_healthy	Basal-cell
SVIL	SVIL	2.73791e-35	-4.63837	1	1	1.86178e-31	0.0183106	0.653723	-0.635412	acute_vs_healthy	Basal-cell
C5orf63.AS2	C5orf63	2.74187e-35	2.14833	1	1	1.86447e-31	0.930012	0.289876	0.640136	acute_vs_healthy	Basal-cell
MARK1.AS4	MARK1	2.80356e-35	-5.95124	1	1	1.90642e-31	0.00978502	0.87106	-0.861275	acute_vs_healthy	Basal-cell
LRCH3.AS3	LRCH3	2.93631e-35	-0.833287	1	1	1.99669e-31	0.637593	0.964557	-0.326964	acute_vs_healthy	Basal-cell
ZNF738	ZNF738	3.47875e-35	2.52927	1	1	2.36555e-31	0.502886	0.097212	0.405674	acute_vs_healthy	Basal-cell
MROH1	MROH1	3.7061e-35	3.82386	1	1	2.52015e-31	0.535728	0.0367577	0.49897	acute_vs_healthy	Basal-cell
DNAJB6.AS2	DNAJB6	4.17762e-35	5.50757	1	1	2.84078e-31	0.999734	0.0229276	0.976806	acute_vs_healthy	Basal-cell
NRIP1	NRIP1	5.18584e-35	4.55111	1	1	3.52637e-31	0.777216	0.0334508	0.743765	acute_vs_healthy	Basal-cell
HCK.AS2	HCK	7.04478e-35	-2.10974	1	1	4.79045e-31	0.105255	0.42416	-0.318904	acute_vs_healthy	Basal-cell
CCDC7.AS5	CCDC7	7.17505e-35	-3.37038	1	1	4.87903e-31	0.134065	0.972771	-0.838706	acute_vs_healthy	Basal-cell
TBC1D31.AS2	TBC1D31	7.21524e-35	1.14833	1	1	4.90636e-31	0.983579	0.557641	0.425938	acute_vs_healthy	Basal-cell
TCF7L2	TCF7L2	7.93401e-35	-5.57547	1	1	5.39512e-31	0.0123082	0.872411	-0.860103	acute_vs_healthy	Basal-cell
DENND1B.AS2	DENND1B	8.27892e-35	-4.7178	1	1	5.62966e-31	0.00960194	0.438126	-0.428524	acute_vs_healthy	Basal-cell
INTS6L.AS2	INTS6L	1.22594e-34	4.21089	1	1	8.33642e-31	0.645668	0.0330267	0.612641	acute_vs_healthy	Basal-cell
ALDH3B1	ALDH3B1	1.84077e-34	-6.84581	1	1	1.25173e-30	0.00014762	0.850858	-0.850711	acute_vs_healthy	Basal-cell
WDPCP	WDPCP	2.0654e-34	1.00444	1	1	1.40447e-30	0.949104	0.574586	0.374518	acute_vs_healthy	Basal-cell
STIL	STIL	2.5549e-34	-2.06685	1	1	1.73733e-30	0.264795	0.855372	-0.590577	acute_vs_healthy	Basal-cell
NCOA7	NCOA7	2.64178e-34	-0.776661	1	1	1.79641e-30	0.68227	0.993917	-0.311647	acute_vs_healthy	Basal-cell
NEDD4L.AS2	NEDD4L	3.18334e-34	-4.19383	1	1	2.16467e-30	0.0522733	0.828357	-0.776084	acute_vs_healthy	Basal-cell
NRG1.AS2	NRG1	3.51682e-34	3.92309	1	1	2.39144e-30	0.659714	0.04887	0.610844	acute_vs_healthy	Basal-cell
C6orf52	C6orf52	3.64741e-34	-4.93656	1	1	2.48024e-30	0.0154946	0.708174	-0.69268	acute_vs_healthy	Basal-cell
PLEKHG3	PLEKHG3	3.65053e-34	-1.85778	1	1	2.48236e-30	0.29272	0.844543	-0.551823	acute_vs_healthy	Basal-cell
ACTR3B	ACTR3B	4.09278e-34	4.51661	1	1	2.78309e-30	0.856027	0.0364125	0.819615	acute_vs_healthy	Basal-cell
ADAL.AS2	ADAL	4.56817e-34	1.80137	1	1	3.10635e-30	0.900202	0.338497	0.561705	acute_vs_healthy	Basal-cell
ARMCX4	ARMCX4	5.09204e-34	-2.57439	1	1	3.46259e-30	0.0818094	0.478355	-0.396546	acute_vs_healthy	Basal-cell
MORN4	MORN4	5.83209e-34	5.34837	1	1	3.96582e-30	0.983851	0.024599	0.959252	acute_vs_healthy	Basal-cell
MIRLET7BHG	MIRLET7BHG	6.66474e-34	3.88365	1	1	4.53202e-30	0.904263	0.0718155	0.832447	acute_vs_healthy	Basal-cell
BCORL1.AS2	BCORL1	7.67897e-34	2.3518	1	1	5.2217e-30	0.926626	0.254277	0.672349	acute_vs_healthy	Basal-cell
HORMAD1	HORMAD1	8.40967e-34	0.828973	1	1	5.71858e-30	0.926867	0.616931	0.309937	acute_vs_healthy	Basal-cell
RAPGEFL1	RAPGEFL1	8.94659e-34	0.766374	1	1	6.08368e-30	0.990247	0.67522	0.315028	acute_vs_healthy	Basal-cell
ZNF227	ZNF227	9.35964e-34	0.827821	1	1	6.36455e-30	0.98219	0.657321	0.32487	acute_vs_healthy	Basal-cell
KLF7.AS2	KLF7	1.13037e-33	-2.14501	1	1	7.68648e-30	0.275154	0.912453	-0.637298	acute_vs_healthy	Basal-cell
HIVEP1	HIVEP1	1.66042e-33	-1.03407	1	1	1.12909e-29	0.583846	0.978769	-0.394923	acute_vs_healthy	Basal-cell
EXOG.AS2	EXOG	2.60968e-33	-1.95396	1	1	1.77458e-29	0.130659	0.449755	-0.319096	acute_vs_healthy	Basal-cell
NPHP3.AS3	NPHP3	2.61166e-33	-1.61945	1	1	1.77593e-29	0.294423	0.743547	-0.449124	acute_vs_healthy	Basal-cell
ZCWPW1.AS2	ZCWPW1	2.94783e-33	4.13015	1	1	2.00453e-29	0.605403	0.0249993	0.580403	acute_vs_healthy	Basal-cell
FERMT1	FERMT1	3.0877e-33	0.796326	1	1	2.09964e-29	0.999831	0.665457	0.334374	acute_vs_healthy	Basal-cell
FANCI.AS3	FANCI	3.22901e-33	-3.20326	1	1	2.19572e-29	0.0450419	0.540062	-0.49502	acute_vs_healthy	Basal-cell
BBOF1.AS3	BBOF1	4.35486e-33	3.17242	1	1	2.96131e-29	0.949958	0.152291	0.797668	acute_vs_healthy	Basal-cell
ENSG00000291129	ENSG00000291129	4.62162e-33	-1.11526	1	1	3.1427e-29	0.560267	0.973759	-0.413491	acute_vs_healthy	Basal-cell
MDFI	MDFI	5.60697e-33	2.52232	1	1	3.81274e-29	0.979081	0.247002	0.732079	acute_vs_healthy	Basal-cell
ZNF383.AS2	ZNF383	6.06075e-33	-2.14102	1	1	4.12131e-29	0.29033	0.921979	-0.631649	acute_vs_healthy	Basal-cell
ZNF92	ZNF92	6.80938e-33	0.867986	1	1	4.63038e-29	0.951276	0.626037	0.325239	acute_vs_healthy	Basal-cell
PPP2R3C.AS3	PPP2R3C	6.94855e-33	1.67532	1	1	4.72501e-29	0.946161	0.394712	0.551449	acute_vs_healthy	Basal-cell
ZNF91.AS2	ZNF91	7.35617e-33	2.31902	1	1	5.00219e-29	0.99779	0.267131	0.730658	acute_vs_healthy	Basal-cell
TAF8.AS2	TAF8	7.52745e-33	-1.33391	1	1	5.11867e-29	0.432511	0.874976	-0.442465	acute_vs_healthy	Basal-cell
MAFTRR.AS3	MAFTRR	8.42319e-33	-4.85707	1	1	5.72777e-29	0.0380767	0.97597	-0.937893	acute_vs_healthy	Basal-cell
KITLG	KITLG	8.53831e-33	1.13343	1	1	5.80605e-29	0.875461	0.486786	0.388675	acute_vs_healthy	Basal-cell
C6orf52.AS2	C6orf52	1.49168e-32	-2.8707	1	1	1.01434e-28	0.0445482	0.375049	-0.330501	acute_vs_healthy	Basal-cell
SENP5	SENP5	1.50359e-32	5.52396	1	1	1.02244e-28	0.911818	0.0160594	0.895759	acute_vs_healthy	Basal-cell
ZSCAN5A	ZSCAN5A	1.64077e-32	2.59398	1	1	1.11572e-28	0.589224	0.109412	0.479813	acute_vs_healthy	Basal-cell
ENSG00000290927	ENSG00000290927	2.50699e-32	4.18352	1	1	1.70475e-28	0.947966	0.0695878	0.878379	acute_vs_healthy	Basal-cell
CARD14	CARD14	2.51451e-32	2.30381	1	1	1.70987e-28	0.601003	0.143256	0.457747	acute_vs_healthy	Basal-cell
PARP11	PARP11	2.6391e-32	2.55217	1	1	1.79459e-28	0.488399	0.0961234	0.392276	acute_vs_healthy	Basal-cell
NETO2	NETO2	2.91957e-32	-1.59546	1	1	1.98531e-28	0.375594	0.893775	-0.518181	acute_vs_healthy	Basal-cell
LRRC27.AS2	LRRC27	3.54831e-32	3.45544	1	1	2.41285e-28	0.964254	0.11768	0.846574	acute_vs_healthy	Basal-cell
ENAH.AS2	ENAH	3.74406e-32	1.21681	1	1	2.54596e-28	0.786869	0.408919	0.377949	acute_vs_healthy	Basal-cell
TIRAP	TIRAP	4.29966e-32	-2.89152	1	1	2.92377e-28	0.0987099	0.694704	-0.595994	acute_vs_healthy	Basal-cell
STRN3.AS2	STRN3	5.05609e-32	3.65073	1	1	3.43814e-28	0.596352	0.0549597	0.541392	acute_vs_healthy	Basal-cell
ZMYM4	ZMYM4	5.19783e-32	4.89158	1	1	3.53452e-28	0.857707	0.0295318	0.828175	acute_vs_healthy	Basal-cell
CNTRL.AS4	CNTRL	5.54602e-32	1.87005	1	1	3.77129e-28	0.98795	0.367186	0.620764	acute_vs_healthy	Basal-cell
ATPSCKMT	ATPSCKMT	6.16002e-32	-1.75916	1	1	4.18881e-28	0.378372	0.969085	-0.590713	acute_vs_healthy	Basal-cell
ZSCAN32	ZSCAN32	6.62611e-32	3.12959	1	1	4.50575e-28	0.585773	0.0688668	0.516906	acute_vs_healthy	Basal-cell
FAM13A.AS2	FAM13A	7.49192e-32	-1.54935	1	1	5.09451e-28	0.414959	0.930516	-0.515557	acute_vs_healthy	Basal-cell
ZNF383	ZNF383	7.76883e-32	1.15669	1	1	5.2828e-28	0.586757	0.285148	0.301609	acute_vs_healthy	Basal-cell
MYO5A.AS7	MYO5A	8.73436e-32	-3.93338	1	1	5.93936e-28	0.0677468	0.858307	-0.79056	acute_vs_healthy	Basal-cell
ASAP2	ASAP2	9.27869e-32	-4.34741	1	1	6.30951e-28	0.0458749	0.811589	-0.765714	acute_vs_healthy	Basal-cell
ANK3.AS2	ANK3	1.07548e-31	-2.75433	1	1	7.31329e-28	0.0486122	0.354306	-0.305694	acute_vs_healthy	Basal-cell
UHRF2.AS2	UHRF2	1.64328e-31	0.818155	1	1	1.11743e-27	0.980431	0.658496	0.321936	acute_vs_healthy	Basal-cell
C8orf44	C8orf44	2.0066e-31	-2.90478	1	1	1.36449e-27	0.0406267	0.362007	-0.32138	acute_vs_healthy	Basal-cell
SIN3B	SIN3B	2.25231e-31	1.28886	1	1	1.53157e-27	0.832058	0.424091	0.407966	acute_vs_healthy	Basal-cell
F3	F3	2.78513e-31	2.30365	1	1	1.89389e-27	0.637393	0.155971	0.481422	acute_vs_healthy	Basal-cell
KMT2A.AS3	KMT2A	3.03337e-31	-0.915216	1	1	2.06269e-27	0.613386	0.964005	-0.350619	acute_vs_healthy	Basal-cell
MTRF1.AS2	MTRF1	5.37554e-31	1.45608	1	1	3.65537e-27	0.672252	0.288321	0.383931	acute_vs_healthy	Basal-cell
CDNF	CDNF	5.85902e-31	0.907836	1	1	3.98413e-27	0.944351	0.599016	0.345335	acute_vs_healthy	Basal-cell
CHEK2	CHEK2	6.67739e-31	1.24091	1	1	4.54063e-27	0.962655	0.517121	0.445535	acute_vs_healthy	Basal-cell
CAB39L	CAB39L	7.16051e-31	3.47224	1	1	4.86915e-27	0.415051	0.031229	0.383822	acute_vs_healthy	Basal-cell
TMEM260.AS2	TMEM260	7.20767e-31	-2.5584	1	1	4.90121e-27	0.175128	0.779574	-0.604446	acute_vs_healthy	Basal-cell
LPIN1.AS2	LPIN1	7.68916e-31	-3.75601	1	1	5.22863e-27	0.0120872	0.339747	-0.32766	acute_vs_healthy	Basal-cell
PPARGC1B	PPARGC1B	1.16057e-30	1.29585	1	1	7.89185e-27	0.621024	0.296469	0.324555	acute_vs_healthy	Basal-cell
FANCA.AS4	FANCA	1.20283e-30	4.46377	1	1	8.17926e-27	0.587488	0.0206813	0.566807	acute_vs_healthy	Basal-cell
AHI1.AS10	AHI1	1.7894e-30	2.7363	1	1	1.21679e-26	0.963058	0.194994	0.768065	acute_vs_healthy	Basal-cell
ENSG00000291100.AS2	ENSG00000291100	1.86362e-30	4.00708	1	1	1.26726e-26	0.929015	0.071632	0.857383	acute_vs_healthy	Basal-cell
TSGA10.AS2	TSGA10	2.47222e-30	-4.63192	1	1	1.68111e-26	0.0106541	0.427613	-0.416959	acute_vs_healthy	Basal-cell
SBF2.AS3	SBF2	2.78513e-30	-3.21862	1	1	1.89389e-26	0.0349056	0.47295	-0.438044	acute_vs_healthy	Basal-cell
MLKL	MLKL	3.02009e-30	-2.89451	1	1	2.05366e-26	0.045388	0.421477	-0.376089	acute_vs_healthy	Basal-cell
PTPN18	PTPN18	3.71213e-30	1.3297	1	1	2.52425e-26	0.741873	0.358508	0.383364	acute_vs_healthy	Basal-cell
CHORDC1	CHORDC1	4.9265e-30	-3.88071	1	1	3.35002e-26	0.052832	0.794704	-0.741872	acute_vs_healthy	Basal-cell
MLLT3	MLLT3	5.23042e-30	0.969987	1	1	3.55668e-26	0.933396	0.57306	0.360335	acute_vs_healthy	Basal-cell
DUBR.AS4	DUBR	5.51048e-30	-1.12041	1	1	3.74713e-26	0.482238	0.85689	-0.374652	acute_vs_healthy	Basal-cell
TVP23C-CDRT4	TVP23C-CDRT4	6.43694e-30	3.20173	1	1	4.37712e-26	0.579284	0.0628799	0.516404	acute_vs_healthy	Basal-cell
ENSG00000290927.AS3	ENSG00000290927	8.4408e-30	-1.87492	1	1	5.73975e-26	0.179936	0.580115	-0.400179	acute_vs_healthy	Basal-cell
AUTS2.AS2	AUTS2	9.93931e-30	4.3119	1	1	6.75873e-26	0.722443	0.0371016	0.685341	acute_vs_healthy	Basal-cell
MFSD4B	MFSD4B	1.17696e-29	-1.55926	1	1	8.00335e-26	0.395053	0.908583	-0.51353	acute_vs_healthy	Basal-cell
METAP1D	METAP1D	1.38949e-29	-3.86115	1	1	9.44856e-26	0.056648	0.837155	-0.780507	acute_vs_healthy	Basal-cell
MAP2.AS2	MAP2	1.5384e-29	2.22476	1	1	1.04611e-25	0.604153	0.154076	0.450077	acute_vs_healthy	Basal-cell
ZFYVE16	ZFYVE16	1.59023e-29	-4.11906	1	1	1.08136e-25	0.0593653	0.911677	-0.852311	acute_vs_healthy	Basal-cell
CCDC126	CCDC126	1.62167e-29	1.54285	1	1	1.10274e-25	0.895297	0.400095	0.495203	acute_vs_healthy	Basal-cell
CREBBP	CREBBP	2.36278e-29	-1.38113	1	1	1.60669e-25	0.385391	0.81192	-0.426529	acute_vs_healthy	Basal-cell
HOTAIR	HOTAIR	3.26854e-29	-2.39754	1	1	2.22261e-25	0.100119	0.504222	-0.404103	acute_vs_healthy	Basal-cell
ZNF613.AS3	ZNF613	3.86879e-29	0.91167	1	1	2.63077e-25	0.939368	0.6018	0.337567	acute_vs_healthy	Basal-cell
ETFDH	ETFDH	6.2556e-29	1.3148	1	1	4.25381e-25	0.970191	0.479883	0.490308	acute_vs_healthy	Basal-cell
PAOX	PAOX	1.01448e-28	1.08882	1	1	6.89846e-25	0.804434	0.449119	0.355314	acute_vs_healthy	Basal-cell
MEAK7	MEAK7	1.25682e-28	3.9236	1	1	8.5464e-25	0.611538	0.0352497	0.576288	acute_vs_healthy	Basal-cell
FOXN2	FOXN2	1.97872e-28	-1.56895	1	1	1.34553e-24	0.241459	0.625743	-0.384285	acute_vs_healthy	Basal-cell
WDCP	WDCP	1.10134e-27	0.898722	1	1	7.48914e-24	0.943005	0.600123	0.342882	acute_vs_healthy	Basal-cell
DONSON	DONSON	1.43227e-27	2.11421	1	1	9.73945e-24	0.75211	0.220789	0.531321	acute_vs_healthy	Basal-cell
GPCPD1	GPCPD1	1.7702e-27	1.35406	1	1	1.20374e-23	0.798112	0.391844	0.406268	acute_vs_healthy	Basal-cell
KMT2A.AS2	KMT2A	2.68547e-27	1.59088	1	1	1.82612e-23	0.944647	0.405791	0.538856	acute_vs_healthy	Basal-cell
ATAT1	ATAT1	4.2279e-27	2.56352	1	1	2.87497e-23	0.840329	0.184455	0.655874	acute_vs_healthy	Basal-cell
POFUT1.AS2	POFUT1	6.59229e-27	1.83106	1	1	4.48276e-23	0.910248	0.341359	0.568889	acute_vs_healthy	Basal-cell
SLC9B2.AS3	SLC9B2	1.42315e-26	-2.31318	1	1	9.67741e-23	0.208857	0.872138	-0.663281	acute_vs_healthy	Basal-cell
NUTM2A-AS1.AS3	NUTM2A-AS1	1.44306e-26	2.15242	1	1	9.81284e-23	0.720543	0.18852	0.532024	acute_vs_healthy	Basal-cell
CSPP1.AS5	CSPP1	2.73227e-26	3.05865	1	1	1.85794e-22	0.651736	0.0838993	0.567837	acute_vs_healthy	Basal-cell
NABP1	NABP1	3.08544e-26	-1.14958	1	1	2.0981e-22	0.529552	0.977353	-0.447801	acute_vs_healthy	Basal-cell
SHLD2	SHLD2	3.86739e-26	2.30334	1	1	2.62983e-22	0.407372	0.0835721	0.3238	acute_vs_healthy	Basal-cell
AGPAT3	AGPAT3	1.21556e-25	-1.83761	1	1	8.26584e-22	0.18683	0.639375	-0.452545	acute_vs_healthy	Basal-cell
EPB41L1.AS5	EPB41L1	1.28162e-25	-1.71027	1	1	8.71502e-22	0.206157	0.614709	-0.408552	acute_vs_healthy	Basal-cell
DMPK	DMPK	1.34444e-25	2.41668	1	1	9.14219e-22	0.680081	0.143893	0.536188	acute_vs_healthy	Basal-cell
CACTIN	CACTIN	1.34886e-25	2.15703	1	1	9.17228e-22	0.692406	0.188362	0.504044	acute_vs_healthy	Basal-cell
PPIP5K2.AS2	PPIP5K2	1.36838e-25	-1.7525	1	1	9.30499e-22	0.175361	0.562441	-0.38708	acute_vs_healthy	Basal-cell
ANKRD26.AS5	ANKRD26	2.44463e-25	-1.38018	1	1	1.66235e-21	0.432533	0.918396	-0.485863	acute_vs_healthy	Basal-cell
ETNK1.AS2	ETNK1	2.66207e-25	-2.38171	1	1	1.8102e-21	0.0778486	0.484722	-0.406874	acute_vs_healthy	Basal-cell
TMEM116	TMEM116	3.60729e-25	2.19129	1	1	2.45296e-21	0.743661	0.191318	0.552343	acute_vs_healthy	Basal-cell
ARHGAP12	ARHGAP12	5.67696e-25	-3.36668	1	1	3.86033e-21	0.0917288	0.818806	-0.727077	acute_vs_healthy	Basal-cell
TNC.AS2	TNC	6.26552e-25	1.22588	1	1	4.26055e-21	0.877111	0.45827	0.418841	acute_vs_healthy	Basal-cell
KDM1A	KDM1A	8.80334e-25	-1.75598	1	1	5.98627e-21	0.320157	0.874735	-0.554577	acute_vs_healthy	Basal-cell
PPP1R3E	PPP1R3E	4.69665e-24	0.94698	1	1	3.19372e-20	0.840719	0.50838	0.332338	acute_vs_healthy	Basal-cell
IRAK4.AS3	IRAK4	5.02166e-24	-1.57331	1	1	3.41473e-20	0.327568	0.833495	-0.505926	acute_vs_healthy	Basal-cell
TLN1	TLN1	6.38341e-24	1.55435	1	1	4.34072e-20	0.900282	0.373661	0.526621	acute_vs_healthy	Basal-cell
UBE3A	UBE3A	6.39224e-24	1.0672	1	1	4.34672e-20	0.954283	0.547251	0.407032	acute_vs_healthy	Basal-cell
CYP20A1	CYP20A1	6.62595e-24	1.86274	1	1	4.50564e-20	0.903703	0.318316	0.585387	acute_vs_healthy	Basal-cell
UQCC6.AS2	UQCC6	1.1723e-23	-1.67749	1	1	7.97161e-20	0.307881	0.802624	-0.494743	acute_vs_healthy	Basal-cell
GCH1.AS2	GCH1	1.76886e-23	2.00024	1	1	1.20282e-19	0.755036	0.225976	0.52906	acute_vs_healthy	Basal-cell
ZNF33B	ZNF33B	1.93186e-23	1.69553	1	1	1.31366e-19	0.651354	0.228961	0.422392	acute_vs_healthy	Basal-cell
NDUFAF7.AS2	NDUFAF7	2.45519e-23	-1.66343	1	1	1.66953e-19	0.256874	0.705433	-0.448559	acute_vs_healthy	Basal-cell
TCOF1.AS2	TCOF1	6.51771e-23	2.98167	1	1	4.43204e-19	0.767733	0.104981	0.662752	acute_vs_healthy	Basal-cell
CNTNAP3B.AS2	CNTNAP3B	8.85784e-23	-1.41689	1	1	6.02333e-19	0.292865	0.690391	-0.397525	acute_vs_healthy	Basal-cell
TMEM260	TMEM260	1.07886e-22	2.0541	1	1	7.33625e-19	0.775274	0.227837	0.547437	acute_vs_healthy	Basal-cell
TUBD1.AS6	TUBD1	1.43876e-22	1.4134	1	1	9.78357e-19	0.90027	0.432388	0.467882	acute_vs_healthy	Basal-cell
UPF3B	UPF3B	2.1707e-22	2.27232	1	1	1.47607e-18	0.621422	0.143057	0.478365	acute_vs_healthy	Basal-cell
LRRC8A	LRRC8A	2.66829e-22	1.55384	1	1	1.81444e-18	0.660451	0.262301	0.39815	acute_vs_healthy	Basal-cell
KCTD20.AS3	KCTD20	7.25298e-22	0.976575	1	1	4.93203e-18	0.788644	0.464105	0.324539	acute_vs_healthy	Basal-cell
RAD1	RAD1	1.91145e-21	1.42832	1	1	1.29979e-17	0.776517	0.345045	0.431473	acute_vs_healthy	Basal-cell
OPA1.AS6	OPA1	2.15763e-21	1.3117	1	1	1.46719e-17	0.619714	0.29558	0.324134	acute_vs_healthy	Basal-cell
DTNB.AS2	DTNB	7.4023e-21	1.68216	1	1	5.03356e-17	0.629382	0.233703	0.395679	acute_vs_healthy	Basal-cell
FAM221A	FAM221A	8.38956e-21	1.62553	1	1	5.7049e-17	0.496327	0.165989	0.330338	acute_vs_healthy	Basal-cell
C6orf136	C6orf136	1.55328e-20	-1.51438	1	1	1.05623e-16	0.251568	0.655913	-0.404344	acute_vs_healthy	Basal-cell
DHX30	DHX30	1.80449e-20	1.29676	1	1	1.22705e-16	0.945533	0.472462	0.473071	acute_vs_healthy	Basal-cell
THEM4	THEM4	3.00574e-20	-1.91137	1	1	2.0439e-16	0.144403	0.584833	-0.44043	acute_vs_healthy	Basal-cell
NAAA	NAAA	3.10817e-20	1.30121	1	1	2.11356e-16	0.506224	0.201421	0.304803	acute_vs_healthy	Basal-cell
UEVLD.AS6	UEVLD	6.52732e-20	-1.28902	1	1	4.43858e-16	0.427881	0.87472	-0.446839	acute_vs_healthy	Basal-cell
MIA2	MIA2	7.01047e-20	-1.52392	1	1	4.76712e-16	0.292409	0.756919	-0.464511	acute_vs_healthy	Basal-cell
PTPN3	PTPN3	1.08334e-19	-1.36523	1	1	7.36669e-16	0.260044	0.618714	-0.358671	acute_vs_healthy	Basal-cell
N4BP1	N4BP1	1.94374e-19	2.53097	1	1	1.32174e-15	0.833632	0.158724	0.674908	acute_vs_healthy	Basal-cell
SBF2-AS1	SBF2-AS1	2.50458e-19	-1.59797	1	1	1.70311e-15	0.14727	0.470039	-0.322769	acute_vs_healthy	Basal-cell
NME6	NME6	5.34739e-19	-1.06445	1	1	3.63623e-15	0.426884	0.788996	-0.362112	acute_vs_healthy	Basal-cell
CHD1.AS2	CHD1	5.83519e-19	-1.4623	1	1	3.96793e-15	0.249233	0.65605	-0.406817	acute_vs_healthy	Basal-cell
ENDOV.AS4	ENDOV	5.85523e-19	1.45985	1	1	3.98156e-15	0.72919	0.306986	0.422205	acute_vs_healthy	Basal-cell
CYP20A1.AS2	CYP20A1	9.00407e-19	1.3174	1	1	6.12277e-15	0.77289	0.371728	0.401162	acute_vs_healthy	Basal-cell
TDP1.AS4	TDP1	3.07366e-17	-1.17118	1	1	2.09009e-13	0.413911	0.819305	-0.405394	acute_vs_healthy	Basal-cell
PABIR2	PABIR2	4.63283e-17	1.83335	1	1	3.15033e-13	0.638558	0.201053	0.437506	acute_vs_healthy	Basal-cell
TBRG1.AS2	TBRG1	9.62723e-17	1.30237	1	1	6.54652e-13	0.608686	0.271813	0.336873	acute_vs_healthy	Basal-cell
FGGY.AS10	FGGY	1.46675e-16	1.50843	1	1	9.97393e-13	0.803747	0.330687	0.47306	acute_vs_healthy	Basal-cell
DSTYK	DSTYK	3.48481e-16	-2.3901	1	1	2.36967e-12	0.0701422	0.468329	-0.398187	acute_vs_healthy	Basal-cell
MPPE1.AS2	MPPE1	4.98843e-15	-1.42156	1	1	3.39214e-11	0.21132	0.553885	-0.342565	acute_vs_healthy	Basal-cell
NLRP1	NLRP1	2.1613e-13	1.9841	1	1	1.46968e-09	0.511205	0.11807	0.393135	acute_vs_healthy	Basal-cell
PML	PML	4.65207e-13	1.07196	1	1	3.16341e-09	0.698089	0.374713	0.323376	acute_vs_healthy	Basal-cell
LINC01550	LINC01550	6.79554e-13	1.24562	1	1	4.62097e-09	0.722597	0.32149	0.401107	acute_vs_healthy	Basal-cell
MACF1.AS2	MACF1	2.32278e-12	1.6093	1	1	1.57949e-08	0.508781	0.174589	0.334191	acute_vs_healthy	Basal-cell
POLR2D	POLR2D	4.13407e-12	0.865758	1	1	2.81117e-08	0.818484	0.514223	0.30426	acute_vs_healthy	Basal-cell
EGLN1	EGLN1	6.11368e-12	1.70382	1	1	4.15731e-08	0.464618	0.135746	0.328872	acute_vs_healthy	Basal-cell
PLSCR1	PLSCR1	2.04183e-11	1.0826	1	1	1.38844e-07	0.779592	0.439865	0.339727	acute_vs_healthy	Basal-cell
WDR26.AS2	WDR26	1.9613e-09	1.36371	1	1	1.33368e-05	0.576774	0.225528	0.351246	acute_vs_healthy	Basal-cell
LTBP4.AS2	LTBP4	1.64574e-08	1.14325	1	1	0.00011191	0.633784	0.297179	0.336605	acute_vs_healthy	Basal-cell
PPHLN1.AS2	PPHLN1	1.67856e-07	1.38646	1	1	0.00114142	0.481265	0.176505	0.30476	acute_vs_healthy	Basal-cell
XPR1	XPR1	1.71681e-14	0.923003	1	1	1.16743e-10	0.999518	0.617903	0.381615	acute_vs_healthy	Basal-Prolif
TMPRSS11D	TMPRSS11D	1.71681e-14	3.43649	1	1	1.16743e-10	0.998209	0.0933636	0.904846	acute_vs_healthy	Basal-Prolif
CNGB1	CNGB1	1.71681e-14	4.79666	1	1	1.16743e-10	0.999815	0.000123459	0.999691	acute_vs_healthy	Basal-Prolif
TM4SF19-DYNLT2B	TM4SF19-DYNLT2B	1.71681e-14	3.91925	1	1	1.16743e-10	0.707909	0.00704107	0.700868	acute_vs_healthy	Basal-Prolif
SLC28A3	SLC28A3	1.71681e-14	4.79656	1	1	1.16743e-10	0.99977	0.000123641	0.999647	acute_vs_healthy	Basal-Prolif
LRCH3.AS3	LRCH3	1.71681e-14	-0.846439	1	1	1.16743e-10	0.656667	0.973653	-0.316986	acute_vs_healthy	Basal-Prolif
SH3TC1.AS4	SH3TC1	1.71681e-14	4.51154	1	1	1.16743e-10	0.999213	0.0136424	0.98557	acute_vs_healthy	Basal-Prolif
ADGRE5	ADGRE5	2.66426e-14	3.30836	1	1	1.8117e-10	0.981292	0.0672082	0.914084	acute_vs_healthy	Basal-Prolif
BEST1	BEST1	2.92848e-14	2.18445	1	1	1.99137e-10	0.676597	0.144338	0.532259	acute_vs_healthy	Basal-Prolif
C12orf56	C12orf56	3.16067e-14	4.79673	1	1	2.14926e-10	0.999847	0.000123623	0.999723	acute_vs_healthy	Basal-Prolif
LRP8	LRP8	6.18912e-14	-0.934063	1	1	4.2086e-10	0.643636	0.999657	-0.356021	acute_vs_healthy	Basal-Prolif
IGF2BP2	IGF2BP2	6.18912e-14	3.24476	1	1	4.2086e-10	0.680147	0.0425357	0.637611	acute_vs_healthy	Basal-Prolif
ENSG00000291147.AS2	ENSG00000291147	6.18912e-14	1.02161	1	1	4.2086e-10	0.831898	0.462554	0.369344	acute_vs_healthy	Basal-Prolif
MACF1.AS8	MACF1	6.18912e-14	1.77934	1	1	4.2086e-10	0.98335	0.358801	0.624549	acute_vs_healthy	Basal-Prolif
PHKA1.AS2	PHKA1	6.18912e-14	4.79666	1	1	4.2086e-10	0.999813	0.000123446	0.99969	acute_vs_healthy	Basal-Prolif
TREM1	TREM1	6.18912e-14	-1.56274	1	1	4.2086e-10	0.455383	0.999578	-0.544195	acute_vs_healthy	Basal-Prolif
CDKN2A	CDKN2A	6.18912e-14	3.9285	1	1	4.2086e-10	0.657936	0.000123464	0.657812	acute_vs_healthy	Basal-Prolif
CYP4F11	CYP4F11	6.18912e-14	1.7014	1	1	4.2086e-10	0.998082	0.386103	0.611979	acute_vs_healthy	Basal-Prolif
SBF2.AS4	SBF2	6.18912e-14	-1.49331	1	1	4.2086e-10	0.473333	0.998571	-0.525238	acute_vs_healthy	Basal-Prolif
CEMIP2	CEMIP2	6.18912e-14	-1.63317	1	1	4.2086e-10	0.309207	0.758442	-0.449235	acute_vs_healthy	Basal-Prolif
TP53INP2	TP53INP2	7.22611e-14	4.1047	1	1	4.91376e-10	0.865917	0.0186946	0.847222	acute_vs_healthy	Basal-Prolif
INTS6L.AS2	INTS6L	7.22611e-14	3.44954	1	1	4.91376e-10	0.654253	0.0241078	0.630145	acute_vs_healthy	Basal-Prolif
PARP11	PARP11	1.01019e-13	2.01941	1	1	6.86926e-10	0.504552	0.10102	0.403532	acute_vs_healthy	Basal-Prolif
MORN4	MORN4	1.01781e-13	4.48374	1	1	6.92113e-10	0.996322	0.0147527	0.981569	acute_vs_healthy	Basal-Prolif
ZNF92	ZNF92	1.11086e-13	1.16537	1	1	7.55385e-10	0.972389	0.493205	0.479184	acute_vs_healthy	Basal-Prolif
PPP1R3B-DT.AS3	PPP1R3B-DT	1.90881e-13	4.39649	1	1	1.29799e-09	0.942146	0.0128804	0.929266	acute_vs_healthy	Basal-Prolif
PTGER3	PTGER3	1.90881e-13	-1.741	1	1	1.29799e-09	0.403268	0.98898	-0.585712	acute_vs_healthy	Basal-Prolif
ATR	ATR	2.20246e-13	-0.842682	1	1	1.49767e-09	0.671725	0.998311	-0.326585	acute_vs_healthy	Basal-Prolif
GLIPR1.AS2	GLIPR1	2.20246e-13	1.36645	1	1	1.49767e-09	0.999091	0.476936	0.522155	acute_vs_healthy	Basal-Prolif
PAPLN	PAPLN	2.20246e-13	0.690918	1	1	1.49767e-09	0.998957	0.697589	0.301368	acute_vs_healthy	Basal-Prolif
KLF7.AS2	KLF7	2.77361e-13	-2.15041	1	1	1.88605e-09	0.275345	0.891956	-0.616611	acute_vs_healthy	Basal-Prolif
AMBRA1	AMBRA1	3.03691e-13	1.88376	1	1	2.0651e-09	0.402907	0.0763325	0.326574	acute_vs_healthy	Basal-Prolif
ENSG00000293105	ENSG00000293105	5.16302e-13	0.78159	1	1	3.51086e-09	0.885454	0.576317	0.309137	acute_vs_healthy	Basal-Prolif
ADAP2.AS3	ADAP2	5.16302e-13	0.847742	1	1	3.51086e-09	0.995232	0.64065	0.354582	acute_vs_healthy	Basal-Prolif
YAP1	YAP1	5.89776e-13	4.64646	1	1	4.01048e-09	0.998887	0.00687034	0.992016	acute_vs_healthy	Basal-Prolif
SENP5.AS2	SENP5	5.89776e-13	1.01021	1	1	4.01048e-09	0.993473	0.578712	0.414761	acute_vs_healthy	Basal-Prolif
ENSG00000235978.AS2	ENSG00000235978	5.89776e-13	4.7198	1	1	4.01048e-09	0.958497	0.000123629	0.958373	acute_vs_healthy	Basal-Prolif
KMT2A.AS3	KMT2A	5.89776e-13	-0.949054	1	1	4.01048e-09	0.631879	0.993906	-0.362028	acute_vs_healthy	Basal-Prolif
ENSG00000291129	ENSG00000291129	6.61879e-13	-1.1858	1	1	4.50078e-09	0.553832	0.994368	-0.440537	acute_vs_healthy	Basal-Prolif
TBC1D31	TBC1D31	6.61879e-13	0.859872	1	1	4.50078e-09	0.989514	0.627061	0.362453	acute_vs_healthy	Basal-Prolif
TBC1D31.AS4	TBC1D31	6.61879e-13	2.01227	1	1	4.50078e-09	0.997832	0.292004	0.705828	acute_vs_healthy	Basal-Prolif
TLK2.AS8	TLK2	6.61879e-13	1.39062	1	1	4.50078e-09	0.907883	0.402657	0.505226	acute_vs_healthy	Basal-Prolif
STK39	STK39	7.30079e-13	1.71092	1	1	4.96454e-09	0.993612	0.380227	0.613384	acute_vs_healthy	Basal-Prolif
NRG1.AS2	NRG1	7.91815e-13	2.9695	1	1	5.38434e-09	0.692751	0.0622073	0.630543	acute_vs_healthy	Basal-Prolif
MIRLET7BHG	MIRLET7BHG	7.91815e-13	3.89251	1	1	5.38434e-09	0.922708	0.0402996	0.882409	acute_vs_healthy	Basal-Prolif
SCAI.AS2	SCAI	9.21035e-13	-3.4608	1	1	6.26304e-09	0.108676	0.956975	-0.848299	acute_vs_healthy	Basal-Prolif
AVL9	AVL9	1.24922e-12	0.995796	1	1	8.4947e-09	0.998829	0.592747	0.406083	acute_vs_healthy	Basal-Prolif
DUBR.AS4	DUBR	1.32355e-12	-1.13065	1	1	9.00017e-09	0.499124	0.881648	-0.382525	acute_vs_healthy	Basal-Prolif
TNC.AS2	TNC	1.41476e-12	1.34633	1	1	9.62037e-09	0.92127	0.428384	0.492886	acute_vs_healthy	Basal-Prolif
SVIL	SVIL	1.41476e-12	-5.12478	1	1	9.62037e-09	0.00685158	0.677074	-0.670222	acute_vs_healthy	Basal-Prolif
HELQ.AS2	HELQ	1.41476e-12	-0.797284	1	1	9.62037e-09	0.679724	0.9973	-0.317576	acute_vs_healthy	Basal-Prolif
DBF4B.AS2	DBF4B	1.57597e-12	1.48242	1	1	1.07166e-08	0.9984	0.426879	0.571521	acute_vs_healthy	Basal-Prolif
MAP2	MAP2	1.72745e-12	1.61793	1	1	1.17467e-08	0.933176	0.345356	0.58782	acute_vs_healthy	Basal-Prolif
NIPAL1	NIPAL1	1.86948e-12	0.94842	1	1	1.27125e-08	0.977984	0.59141	0.386575	acute_vs_healthy	Basal-Prolif
ALKBH8	ALKBH8	2.7472e-12	0.769495	1	1	1.8681e-08	0.999813	0.672188	0.327625	acute_vs_healthy	Basal-Prolif
ZFP90	ZFP90	2.7472e-12	1.94955	1	1	1.8681e-08	0.847793	0.255685	0.592108	acute_vs_healthy	Basal-Prolif
NLGN4Y	NLGN4Y	3.08821e-12	0.730065	1	1	2.09998e-08	0.984752	0.673222	0.31153	acute_vs_healthy	Basal-Prolif
SPECC1.AS2	SPECC1	3.08821e-12	1.66677	1	1	2.09998e-08	0.999657	0.389687	0.60997	acute_vs_healthy	Basal-Prolif
TTC23	TTC23	3.3046e-12	0.748942	1	1	2.24713e-08	0.88188	0.578616	0.303265	acute_vs_healthy	Basal-Prolif
PTPN20.AS5	PTPN20	3.4181e-12	2.10309	1	1	2.32431e-08	0.940926	0.254707	0.686219	acute_vs_healthy	Basal-Prolif
GK.AS4	GK	3.7299e-12	1.86279	1	1	2.53633e-08	0.994809	0.3434	0.651409	acute_vs_healthy	Basal-Prolif
DNAJB6.AS2	DNAJB6	4.26097e-12	4.49757	1	1	2.89746e-08	0.999732	0.0144325	0.9853	acute_vs_healthy	Basal-Prolif
USP53	USP53	5.64668e-12	-0.865368	1	1	3.83974e-08	0.62234	0.947999	-0.325659	acute_vs_healthy	Basal-Prolif
ENSG00000290927	ENSG00000290927	6.11867e-12	3.76127	1	1	4.16069e-08	0.947595	0.0553517	0.892244	acute_vs_healthy	Basal-Prolif
KITLG	KITLG	6.2132e-12	1.15172	1	1	4.22498e-08	0.883677	0.457189	0.426488	acute_vs_healthy	Basal-Prolif
ZCWPW1.AS2	ZCWPW1	6.2132e-12	3.85746	1	1	4.22498e-08	0.666351	0.00531489	0.661037	acute_vs_healthy	Basal-Prolif
CCDC18	CCDC18	7.42691e-12	-1.37781	1	1	5.0503e-08	0.485856	0.982909	-0.497053	acute_vs_healthy	Basal-Prolif
ASAP2	ASAP2	8.37794e-12	-4.50905	1	1	5.697e-08	0.0356422	0.824986	-0.789344	acute_vs_healthy	Basal-Prolif
KMT2A.AS2	KMT2A	1.23004e-11	1.66265	1	1	8.36424e-08	0.952884	0.375323	0.577561	acute_vs_healthy	Basal-Prolif
ENSG00000291102	ENSG00000291102	1.27425e-11	2.99434	1	1	8.66488e-08	0.371785	0.000123399	0.371662	acute_vs_healthy	Basal-Prolif
GOLIM4	GOLIM4	1.27425e-11	-2.85871	1	1	8.66488e-08	0.192786	0.99621	-0.803424	acute_vs_healthy	Basal-Prolif
SLK	SLK	1.27535e-11	1.29459	1	1	8.67237e-08	0.990961	0.479866	0.511096	acute_vs_healthy	Basal-Prolif
UHRF2.AS2	UHRF2	1.47446e-11	0.99246	1	1	1.00264e-07	0.991557	0.556563	0.434995	acute_vs_healthy	Basal-Prolif
MROH1	MROH1	1.77217e-11	2.97225	1	1	1.20508e-07	0.527173	0.0296317	0.497541	acute_vs_healthy	Basal-Prolif
TMEM164	TMEM164	1.95717e-11	-3.9856	1	1	1.33088e-07	0.0857752	0.999725	-0.91395	acute_vs_healthy	Basal-Prolif
TBC1D31.AS2	TBC1D31	1.96943e-11	0.890601	1	1	1.33921e-07	0.965984	0.600118	0.365867	acute_vs_healthy	Basal-Prolif
FOCAD.AS2	FOCAD	2.05041e-11	2.01838	1	1	1.39428e-07	0.992775	0.306529	0.686246	acute_vs_healthy	Basal-Prolif
NEMP1.AS2	NEMP1	2.33877e-11	1.60689	1	1	1.59037e-07	0.882283	0.330648	0.551634	acute_vs_healthy	Basal-Prolif
MAFTRR.AS2	MAFTRR	2.40962e-11	0.700201	1	1	1.63854e-07	0.987949	0.668821	0.319128	acute_vs_healthy	Basal-Prolif
RASGEF1B.AS2	RASGEF1B	2.5251e-11	-0.960155	1	1	1.71707e-07	0.613292	0.97892	-0.365627	acute_vs_healthy	Basal-Prolif
ZNF613.AS3	ZNF613	3.26914e-11	0.992772	1	1	2.22302e-07	0.961464	0.557076	0.404388	acute_vs_healthy	Basal-Prolif
ZNF227	ZNF227	3.33512e-11	0.723993	1	1	2.26788e-07	0.97194	0.67182	0.30012	acute_vs_healthy	Basal-Prolif
KANSL1	KANSL1	3.88075e-11	-6.17989	1	1	2.63891e-07	0.00151549	0.991314	-0.989799	acute_vs_healthy	Basal-Prolif
ODF2L.AS4	ODF2L	3.98863e-11	-0.781272	1	1	2.71227e-07	0.685239	0.999495	-0.314256	acute_vs_healthy	Basal-Prolif
LRRC27.AS2	LRRC27	3.99994e-11	3.35477	1	1	2.71996e-07	0.964996	0.0957433	0.869252	acute_vs_healthy	Basal-Prolif
ERG.AS3	ERG	4.51396e-11	-1.65333	1	1	3.0695e-07	0.433839	0.999856	-0.566017	acute_vs_healthy	Basal-Prolif
C5orf63.AS2	C5orf63	5.31376e-11	2.01948	1	1	3.61336e-07	0.913691	0.27498	0.638711	acute_vs_healthy	Basal-Prolif
SENP5	SENP5	7.32833e-11	4.46683	1	1	4.98327e-07	0.902788	0.0057496	0.897039	acute_vs_healthy	Basal-Prolif
AHI1.AS10	AHI1	7.554e-11	2.70311	1	1	5.13672e-07	0.948879	0.172061	0.776818	acute_vs_healthy	Basal-Prolif
SIN3B	SIN3B	8.53666e-11	1.08251	1	1	5.80493e-07	0.851271	0.44605	0.405221	acute_vs_healthy	Basal-Prolif
MAP2.AS2	MAP2	9.22033e-11	1.51554	1	1	6.26983e-07	0.636091	0.20286	0.433231	acute_vs_healthy	Basal-Prolif
FAM13A.AS2	FAM13A	9.2879e-11	-1.54419	1	1	6.31578e-07	0.428375	0.959876	-0.5315	acute_vs_healthy	Basal-Prolif
ACTR3B	ACTR3B	9.42753e-11	4.07332	1	1	6.41072e-07	0.833224	0.01772	0.815504	acute_vs_healthy	Basal-Prolif
ABI2.AS2	ABI2	1.05434e-10	-1.2809	1	1	7.16952e-07	0.369707	0.737592	-0.367885	acute_vs_healthy	Basal-Prolif
TSGA10.AS2	TSGA10	1.07313e-10	-4.37689	1	1	7.29725e-07	0.0109781	0.483797	-0.472819	acute_vs_healthy	Basal-Prolif
PPARGC1B	PPARGC1B	1.68627e-10	1.20659	1	1	1.14666e-06	0.625161	0.281498	0.343663	acute_vs_healthy	Basal-Prolif
RAD54L.AS4	RAD54L	1.70437e-10	4.33217	1	1	1.15897e-06	0.996494	0.0231864	0.973307	acute_vs_healthy	Basal-Prolif
DENND1B.AS2	DENND1B	1.8223e-10	-4.24086	1	1	1.23916e-06	0.00960994	0.438126	-0.428516	acute_vs_healthy	Basal-Prolif
MEAK7	MEAK7	1.92659e-10	3.50476	1	1	1.31008e-06	0.62681	0.017137	0.609673	acute_vs_healthy	Basal-Prolif
ZNF383	ZNF383	1.94789e-10	1.40436	1	1	1.32457e-06	0.601432	0.233296	0.368136	acute_vs_healthy	Basal-Prolif
ADGRE2	ADGRE2	1.9794e-10	-3.94921	1	1	1.34599e-06	0.0878406	0.995755	-0.907914	acute_vs_healthy	Basal-Prolif
MLKL	MLKL	2.17051e-10	-3.54737	1	1	1.47595e-06	0.0234394	0.3875	-0.364061	acute_vs_healthy	Basal-Prolif
MLLT3	MLLT3	3.02279e-10	0.947584	1	1	2.0555e-06	0.936339	0.561299	0.37504	acute_vs_healthy	Basal-Prolif
HIVEP1	HIVEP1	3.05477e-10	-1.01647	1	1	2.07724e-06	0.578899	0.927878	-0.348979	acute_vs_healthy	Basal-Prolif
MFSD4B	MFSD4B	3.21726e-10	-1.56887	1	1	2.18774e-06	0.405555	0.933905	-0.52835	acute_vs_healthy	Basal-Prolif
MDFI	MDFI	3.26171e-10	2.29372	1	1	2.21796e-06	0.969808	0.246401	0.723407	acute_vs_healthy	Basal-Prolif
STRN3.AS2	STRN3	3.78798e-10	2.91115	1	1	2.57583e-06	0.628528	0.0565091	0.572019	acute_vs_healthy	Basal-Prolif
ZNF502	ZNF502	3.80482e-10	-4.98977	1	1	2.58728e-06	0.0285568	0.947747	-0.91919	acute_vs_healthy	Basal-Prolif
FERMT1	FERMT1	4.23788e-10	0.723449	1	1	2.88176e-06	0.99983	0.667347	0.332483	acute_vs_healthy	Basal-Prolif
AUTS2.AS2	AUTS2	4.50843e-10	3.61283	1	1	3.06574e-06	0.739503	0.0285848	0.710918	acute_vs_healthy	Basal-Prolif
CNTRL.AS4	CNTRL	4.51969e-10	1.7497	1	1	3.07339e-06	0.989331	0.369242	0.620089	acute_vs_healthy	Basal-Prolif
BBOF1.AS3	BBOF1	5.04576e-10	2.85754	1	1	3.43111e-06	0.932864	0.147425	0.78544	acute_vs_healthy	Basal-Prolif
ALDH3B1	ALDH3B1	5.31086e-10	-5.96652	1	1	3.61139e-06	0.000146399	0.861281	-0.861135	acute_vs_healthy	Basal-Prolif
NEDD4L.AS2	NEDD4L	5.44921e-10	-4.40428	1	1	3.70547e-06	0.0417131	0.84161	-0.799897	acute_vs_healthy	Basal-Prolif
LPIN1.AS2	LPIN1	5.66973e-10	-4.36118	1	1	3.85542e-06	0.000541223	0.347629	-0.347088	acute_vs_healthy	Basal-Prolif
MAT1A	MAT1A	5.82353e-10	-1.53821	1	1	3.96e-06	0.459653	0.999631	-0.539978	acute_vs_healthy	Basal-Prolif
ENSG00000246090	ENSG00000246090	6.0576e-10	-2.50125	1	1	4.11917e-06	0.253871	0.998158	-0.744287	acute_vs_healthy	Basal-Prolif
TCF7L2	TCF7L2	6.07595e-10	-5.86166	1	1	4.13164e-06	0.00227301	0.852948	-0.850675	acute_vs_healthy	Basal-Prolif
CLEC7A	CLEC7A	6.09435e-10	-3.77653	1	1	4.14416e-06	0.0946129	0.999839	-0.905226	acute_vs_healthy	Basal-Prolif
CAB39L	CAB39L	6.24071e-10	1.68817	1	1	4.24369e-06	0.446799	0.0810706	0.365729	acute_vs_healthy	Basal-Prolif
PLEKHG3	PLEKHG3	6.36475e-10	-1.82898	1	1	4.32803e-06	0.302249	0.847818	-0.545569	acute_vs_healthy	Basal-Prolif
NRIP1	NRIP1	6.44975e-10	3.78891	1	1	4.38583e-06	0.780774	0.0244948	0.756279	acute_vs_healthy	Basal-Prolif
POFUT1.AS2	POFUT1	6.65588e-10	1.67699	1	1	4.526e-06	0.93772	0.33687	0.60085	acute_vs_healthy	Basal-Prolif
PLOD2.AS4	PLOD2	7.60529e-10	0.993411	1	1	5.17159e-06	0.912025	0.520375	0.391651	acute_vs_healthy	Basal-Prolif
NPHP3.AS3	NPHP3	7.89906e-10	-1.61572	1	1	5.37136e-06	0.293935	0.732792	-0.438857	acute_vs_healthy	Basal-Prolif
TMEM263	TMEM263	8.23225e-10	-1.93592	1	1	5.59793e-06	0.332527	0.938623	-0.606096	acute_vs_healthy	Basal-Prolif
CHORDC1	CHORDC1	8.78408e-10	-4.00593	1	1	5.97317e-06	0.0420737	0.799254	-0.75718	acute_vs_healthy	Basal-Prolif
C6orf52	C6orf52	9.60805e-10	-4.00911	1	1	6.53347e-06	0.0262166	0.660727	-0.63451	acute_vs_healthy	Basal-Prolif
METAP1D	METAP1D	9.75037e-10	-4.88898	1	1	6.63025e-06	0.0253941	0.863584	-0.83819	acute_vs_healthy	Basal-Prolif
RUBCN.AS2	RUBCN	1.00639e-09	-5.62548	1	1	6.84346e-06	0.00293046	0.77484	-0.77191	acute_vs_healthy	Basal-Prolif
PRELID3A.AS2	PRELID3A	1.14429e-09	-3.97529	1	1	7.78116e-06	0.0845695	0.987067	-0.902497	acute_vs_healthy	Basal-Prolif
DYRK3	DYRK3	1.37264e-09	-5.88114	1	1	9.33393e-06	0.000168274	0.827212	-0.827044	acute_vs_healthy	Basal-Prolif
SNRK.AS2	SNRK	1.3872e-09	1.52092	1	1	9.43299e-06	0.949188	0.404212	0.544976	acute_vs_healthy	Basal-Prolif
ETFDH	ETFDH	1.61111e-09	1.58547	1	1	1.09556e-05	0.966093	0.392453	0.57364	acute_vs_healthy	Basal-Prolif
ZSCAN5A	ZSCAN5A	1.7431e-09	2.13713	1	1	1.18531e-05	0.617412	0.118664	0.498748	acute_vs_healthy	Basal-Prolif
HCK.AS2	HCK	2.03971e-09	-2.04747	1	1	1.38701e-05	0.1195	0.463731	-0.344231	acute_vs_healthy	Basal-Prolif
RAPGEFL1	RAPGEFL1	2.20996e-09	0.675247	1	1	1.50277e-05	0.990966	0.687138	0.303827	acute_vs_healthy	Basal-Prolif
DMPK	DMPK	2.4601e-09	2.22727	1	1	1.67286e-05	0.736056	0.13886	0.597197	acute_vs_healthy	Basal-Prolif
F3	F3	2.4821e-09	1.57506	1	1	1.68783e-05	0.644885	0.197821	0.447064	acute_vs_healthy	Basal-Prolif
CCDC7.AS5	CCDC7	2.56034e-09	-3.17424	1	1	1.74103e-05	0.14789	0.992569	-0.84468	acute_vs_healthy	Basal-Prolif
CLHC1.AS2	CLHC1	2.69e-09	-1.46419	1	1	1.8292e-05	0.457435	0.980832	-0.523397	acute_vs_healthy	Basal-Prolif
CCDC77	CCDC77	2.86237e-09	-2.57733	1	1	1.94641e-05	0.20211	0.976929	-0.774819	acute_vs_healthy	Basal-Prolif
IRAK4.AS3	IRAK4	3.03968e-09	-1.7408	1	1	2.06698e-05	0.321063	0.859553	-0.53849	acute_vs_healthy	Basal-Prolif
SBF2.AS3	SBF2	3.34766e-09	-4.83359	1	1	2.27641e-05	0.00192625	0.479	-0.477074	acute_vs_healthy	Basal-Prolif
MARK1.AS4	MARK1	3.81195e-09	-4.59501	1	1	2.59212e-05	0.025289	0.879155	-0.853866	acute_vs_healthy	Basal-Prolif
ENSG00000290927.AS3	ENSG00000290927	3.92392e-09	-2.03662	1	1	2.66827e-05	0.182735	0.633662	-0.450926	acute_vs_healthy	Basal-Prolif
CARD14	CARD14	4.02558e-09	2.03391	1	1	2.73739e-05	0.596368	0.135021	0.461348	acute_vs_healthy	Basal-Prolif
CDNF	CDNF	4.06293e-09	0.778416	1	1	2.76279e-05	0.931469	0.620022	0.311448	acute_vs_healthy	Basal-Prolif
ZMYM4	ZMYM4	4.78984e-09	2.92589	1	1	3.25709e-05	0.847067	0.0781722	0.768895	acute_vs_healthy	Basal-Prolif
C8orf44	C8orf44	4.79987e-09	-2.66605	1	1	3.26391e-05	0.0505011	0.395935	-0.345434	acute_vs_healthy	Basal-Prolif
NUTM2A-AS1.AS3	NUTM2A-AS1	5.09146e-09	1.92046	1	1	3.46219e-05	0.751177	0.190085	0.561092	acute_vs_healthy	Basal-Prolif
TVP23C-CDRT4	TVP23C-CDRT4	5.77963e-09	1.90035	1	1	3.93015e-05	0.551624	0.100318	0.451306	acute_vs_healthy	Basal-Prolif
ADAL.AS2	ADAL	6.01093e-09	1.62638	1	1	4.08743e-05	0.89453	0.326967	0.567563	acute_vs_healthy	Basal-Prolif
NETO2	NETO2	6.64257e-09	-1.41507	1	1	4.51695e-05	0.423851	0.902143	-0.478292	acute_vs_healthy	Basal-Prolif
LINC00511	LINC00511	7.96041e-09	0.799329	1	1	5.41308e-05	0.974967	0.609875	0.365092	acute_vs_healthy	Basal-Prolif
ZNF383.AS2	ZNF383	8.3088e-09	-1.82291	1	1	5.64998e-05	0.347714	0.949886	-0.602172	acute_vs_healthy	Basal-Prolif
TIRAP	TIRAP	9.09507e-09	-2.69498	1	1	6.18465e-05	0.109293	0.701775	-0.592482	acute_vs_healthy	Basal-Prolif
ZNF91.AS2	ZNF91	1.1439e-08	1.82685	1	1	7.7785e-05	0.954213	0.292117	0.662096	acute_vs_healthy	Basal-Prolif
GCH1.AS2	GCH1	1.17799e-08	2.32162	1	1	8.01035e-05	0.777163	0.167003	0.61016	acute_vs_healthy	Basal-Prolif
FANCA.AS4	FANCA	1.57143e-08	2.22852	1	1	0.000106857	0.57374	0.0706576	0.503083	acute_vs_healthy	Basal-Prolif
ENDOV.AS4	ENDOV	2.06383e-08	1.62918	1	1	0.00014034	0.766666	0.263611	0.503055	acute_vs_healthy	Basal-Prolif
CYP20A1	CYP20A1	2.26675e-08	1.78332	1	1	0.000154139	0.928378	0.312692	0.615686	acute_vs_healthy	Basal-Prolif
ST7L.AS3	ST7L	2.39323e-08	2.98356	1	1	0.000162739	0.471598	0.0249995	0.446599	acute_vs_healthy	Basal-Prolif
TAF8.AS2	TAF8	2.4977e-08	-1.20944	1	1	0.000169843	0.457232	0.850203	-0.392971	acute_vs_healthy	Basal-Prolif
CYP20A1.AS2	CYP20A1	2.6167e-08	1.59545	1	1	0.000177936	0.789526	0.29378	0.495746	acute_vs_healthy	Basal-Prolif
CNTNAP3B.AS2	CNTNAP3B	3.8484e-08	-1.75038	1	1	0.000261692	0.254069	0.717889	-0.46382	acute_vs_healthy	Basal-Prolif
TMEM39B.AS2	TMEM39B	3.90279e-08	1.28465	1	1	0.00026539	0.601779	0.259117	0.342662	acute_vs_healthy	Basal-Prolif
WDPCP	WDPCP	4.32292e-08	0.866077	1	1	0.000293959	0.953521	0.587365	0.366156	acute_vs_healthy	Basal-Prolif
RALGPS1	RALGPS1	4.86993e-08	2.12009	1	1	0.000331155	0.931291	0.235178	0.696113	acute_vs_healthy	Basal-Prolif
LRRC8A	LRRC8A	6.20597e-08	1.57705	1	1	0.000422006	0.618926	0.214069	0.404857	acute_vs_healthy	Basal-Prolif
ATPSCKMT	ATPSCKMT	6.83219e-08	-1.60701	1	1	0.000464589	0.399001	0.935783	-0.536782	acute_vs_healthy	Basal-Prolif
AGPAT3	AGPAT3	6.99423e-08	-2.70971	1	1	0.000475608	0.115915	0.623726	-0.507811	acute_vs_healthy	Basal-Prolif
ENAH.AS2	ENAH	8.85817e-08	1.08921	1	1	0.000602356	0.76382	0.392777	0.371043	acute_vs_healthy	Basal-Prolif
MAFTRR.AS3	MAFTRR	1.00102e-07	-3.29386	1	1	0.000680692	0.0920053	0.904033	-0.812028	acute_vs_healthy	Basal-Prolif
AADACL2	AADACL2	1.03017e-07	-1.98423	1	1	0.000700515	0.222142	0.760058	-0.537916	acute_vs_healthy	Basal-Prolif
NDUFAF7.AS2	NDUFAF7	1.03408e-07	-1.84575	1	1	0.000703173	0.241473	0.740099	-0.498627	acute_vs_healthy	Basal-Prolif
ARHGAP12	ARHGAP12	1.04106e-07	-3.21403	1	1	0.000707918	0.0968966	0.833862	-0.736965	acute_vs_healthy	Basal-Prolif
GPCPD1	GPCPD1	1.25337e-07	1.05218	1	1	0.000852295	0.794876	0.424737	0.370139	acute_vs_healthy	Basal-Prolif
PPIP5K2	PPIP5K2	1.3879e-07	1.211	1	1	0.000943774	0.602122	0.255319	0.346802	acute_vs_healthy	Basal-Prolif
THEM4	THEM4	1.52542e-07	-2.32002	1	1	0.00103728	0.116977	0.61116	-0.494183	acute_vs_healthy	Basal-Prolif
EPB41L1.AS5	EPB41L1	1.88581e-07	-1.54354	1	1	0.00128235	0.224551	0.603373	-0.378822	acute_vs_healthy	Basal-Prolif
BCORL1.AS2	BCORL1	2.24532e-07	1.74111	1	1	0.00152682	0.904872	0.310149	0.594723	acute_vs_healthy	Basal-Prolif
ELF2	ELF2	2.49922e-07	1.203	1	1	0.00169947	0.523295	0.210319	0.312977	acute_vs_healthy	Basal-Prolif
NABP1	NABP1	3.22332e-07	-1.05867	1	1	0.00219186	0.567122	0.978213	-0.411091	acute_vs_healthy	Basal-Prolif
FOXN2	FOXN2	3.2614e-07	-1.65814	1	1	0.00221775	0.230859	0.607555	-0.376697	acute_vs_healthy	Basal-Prolif
C6orf136	C6orf136	3.82216e-07	-1.81365	1	1	0.00259907	0.22208	0.659703	-0.437623	acute_vs_healthy	Basal-Prolif
NME6	NME6	4.05491e-07	-1.16971	1	1	0.00275734	0.41288	0.800513	-0.387633	acute_vs_healthy	Basal-Prolif
ZNF738	ZNF738	4.47845e-07	1.97139	1	1	0.00304535	0.436375	0.0852723	0.351103	acute_vs_healthy	Basal-Prolif
ENSG00000291100.AS2	ENSG00000291100	5.04422e-07	2.7335	1	1	0.00343007	0.866528	0.111873	0.754656	acute_vs_healthy	Basal-Prolif
TCOF1.AS2	TCOF1	5.15124e-07	2.34925	1	1	0.00350285	0.777156	0.12893	0.648226	acute_vs_healthy	Basal-Prolif
ATF7IP2.AS2	ATF7IP2	5.42574e-07	-2.80521	1	1	0.0036895	0.129047	0.793021	-0.663974	acute_vs_healthy	Basal-Prolif
CACTIN	CACTIN	8.69925e-07	1.99175	1	1	0.00591549	0.624658	0.158457	0.466201	acute_vs_healthy	Basal-Prolif
PPIP5K2.AS2	PPIP5K2	9.43922e-07	-1.55064	1	1	0.00641867	0.218035	0.615024	-0.396989	acute_vs_healthy	Basal-Prolif
DSTYK	DSTYK	1.02308e-06	-2.44575	1	1	0.00695694	0.0785675	0.517172	-0.438604	acute_vs_healthy	Basal-Prolif
CSPP1.AS5	CSPP1	1.10848e-06	2.13987	1	1	0.00753766	0.656955	0.11603	0.540924	acute_vs_healthy	Basal-Prolif
ZFYVE16	ZFYVE16	1.3778e-06	-3.4738	1	1	0.00936905	0.0791439	0.85886	-0.779716	acute_vs_healthy	Basal-Prolif
UEVLD.AS6	UEVLD	1.55208e-06	-1.21996	1	1	0.0105541	0.460958	0.893841	-0.432883	acute_vs_healthy	Basal-Prolif
FANCI.AS3	FANCI	1.57923e-06	-2.49251	1	1	0.0107387	0.0768214	0.513552	-0.436731	acute_vs_healthy	Basal-Prolif
ATAT1	ATAT1	2.16892e-06	2.0285	1	1	0.0147487	0.798591	0.199137	0.599454	acute_vs_healthy	Basal-Prolif
SLC9B2.AS3	SLC9B2	2.19632e-06	-2.42394	1	1	0.014935	0.182944	0.831113	-0.648169	acute_vs_healthy	Basal-Prolif
FGGY.AS10	FGGY	2.2554e-06	1.7956	1	1	0.0153367	0.772622	0.220844	0.551778	acute_vs_healthy	Basal-Prolif
MPHOSPH9	MPHOSPH9	2.34075e-06	-1.58896	1	1	0.0159171	0.362638	0.875813	-0.513175	acute_vs_healthy	Basal-Prolif
CCDC126	CCDC126	2.43511e-06	1.19931	1	1	0.0165587	0.904227	0.438055	0.466172	acute_vs_healthy	Basal-Prolif
NLRP1	NLRP1	2.47979e-06	1.83227	1	1	0.0168626	0.463185	0.0808651	0.38232	acute_vs_healthy	Basal-Prolif
HOTAIR	HOTAIR	2.78204e-06	-2.02461	1	1	0.0189179	0.117956	0.46755	-0.349594	acute_vs_healthy	Basal-Prolif
TMEM41B	TMEM41B	3.10556e-06	1.92701	1	1	0.0211178	0.451156	0.0827022	0.368453	acute_vs_healthy	Basal-Prolif
TMEM260	TMEM260	3.21893e-06	1.78244	1	1	0.0218887	0.777638	0.235397	0.542242	acute_vs_healthy	Basal-Prolif
TP53I3	TP53I3	3.80113e-06	2.64944	1	1	0.0258477	0.399925	0.0346213	0.365304	acute_vs_healthy	Basal-Prolif
LTBP4.AS2	LTBP4	4.1018e-06	2.19635	1	1	0.0278922	0.606421	0.130132	0.476289	acute_vs_healthy	Basal-Prolif
NAAA	NAAA	4.41993e-06	1.54543	1	1	0.0300555	0.542827	0.159341	0.383487	acute_vs_healthy	Basal-Prolif
TMEM260.AS2	TMEM260	4.63263e-06	-1.99771	1	1	0.0315019	0.228241	0.76809	-0.539849	acute_vs_healthy	Basal-Prolif
PAOX	PAOX	4.70008e-06	0.856325	1	1	0.0319605	0.780314	0.471655	0.308658	acute_vs_healthy	Basal-Prolif
TUBD1.AS6	TUBD1	5.74406e-06	1.18375	1	1	0.0390596	0.947427	0.472933	0.474494	acute_vs_healthy	Basal-Prolif
MIA2	MIA2	6.15263e-06	-1.8716	1	1	0.0418379	0.241833	0.759369	-0.517536	acute_vs_healthy	Basal-Prolif
SUGT1	SUGT1	6.41725e-06	1.65283	1	1	0.0436373	0.405051	0.0908036	0.314247	acute_vs_healthy	Basal-Prolif
N4BP1	N4BP1	6.43068e-06	1.98283	1	1	0.0437286	0.83529	0.19347	0.641821	acute_vs_healthy	Basal-Prolif
SKA3	SKA3	7.00597e-06	0.671236	1	1	0.0476406	0.966073	0.632835	0.333238	acute_vs_healthy	Basal-Prolif
PBX3.AS2	PBX3	7.25996e-06	1.82377	1	1	0.0493677	0.44993	0.117038	0.332892	acute_vs_healthy	Basal-Prolif
ANKRD26.AS5	ANKRD26	8.87582e-06	-1.27554	1	1	0.0603556	0.436283	0.864943	-0.42866	acute_vs_healthy	Basal-Prolif
PTPN18	PTPN18	9.29415e-06	0.782964	1	1	0.0632002	0.800427	0.477131	0.323296	acute_vs_healthy	Basal-Prolif
SHLD2	SHLD2	1.1834e-05	1.13841	1	1	0.0804715	0.463242	0.162561	0.300681	acute_vs_healthy	Basal-Prolif
MTRF1.AS2	MTRF1	1.2594e-05	1.21014	1	1	0.0856391	0.60154	0.262853	0.338688	acute_vs_healthy	Basal-Prolif
CREBBP	CREBBP	1.30773e-05	-1.19058	1	1	0.0889258	0.408506	0.776922	-0.368416	acute_vs_healthy	Basal-Prolif
DTNB.AS2	DTNB	1.5844e-05	1.65574	1	1	0.107739	0.606575	0.205636	0.400939	acute_vs_healthy	Basal-Prolif
BTBD3	BTBD3	1.60863e-05	-1.57105	1	1	0.109387	0.152238	0.491171	-0.338933	acute_vs_healthy	Basal-Prolif
UPF3B	UPF3B	1.77331e-05	1.30143	1	1	0.120585	0.58976	0.200961	0.3888	acute_vs_healthy	Basal-Prolif
ARMCX4	ARMCX4	2.71574e-05	-1.93968	1	1	0.18467	0.0966588	0.398077	-0.301418	acute_vs_healthy	Basal-Prolif
SRPK2.AS2	SRPK2	3.04072e-05	-0.925416	1	1	0.206769	0.554423	0.920252	-0.365828	acute_vs_healthy	Basal-Prolif
DHX30	DHX30	3.67509e-05	1.14756	1	1	0.249906	0.895242	0.458595	0.436647	acute_vs_healthy	Basal-Prolif
MACF1.AS2	MACF1	4.02548e-05	1.55643	1	1	0.273733	0.548066	0.167648	0.380418	acute_vs_healthy	Basal-Prolif
TLN1	TLN1	4.45832e-05	1.01191	1	1	0.303166	0.891703	0.466867	0.424835	acute_vs_healthy	Basal-Prolif
LINC01550	LINC01550	4.93131e-05	1.52167	1	1	0.335329	0.679958	0.245974	0.433984	acute_vs_healthy	Basal-Prolif
MYO5A.AS7	MYO5A	5.76238e-05	-4.03761	1	1	0.391842	0.0503487	0.721768	-0.671419	acute_vs_healthy	Basal-Prolif
UQCC6.AS2	UQCC6	6.5482e-05	-1.49702	1	1	0.445278	0.327905	0.795529	-0.467624	acute_vs_healthy	Basal-Prolif
TMEM116	TMEM116	7.43733e-05	1.50366	1	1	0.505739	0.700892	0.229493	0.471398	acute_vs_healthy	Basal-Prolif
KIFC1	KIFC1	8.55248e-05	-1.05113	1	1	0.581568	0.464989	0.798668	-0.333679	acute_vs_healthy	Basal-Prolif
PPP2R3C.AS3	PPP2R3C	0.000107989	1.08252	1	1	0.734325	0.910313	0.471565	0.438747	acute_vs_healthy	Basal-Prolif
ENSG00000291152.AS2	ENSG00000291152	0.000117562	-0.834728	1	1	0.799419	0.574746	0.887717	-0.312971	acute_vs_healthy	Basal-Prolif
CHD1.AS2	CHD1	0.000121864	-1.61333	1	1	0.828672	0.203514	0.546623	-0.34311	acute_vs_healthy	Basal-Prolif
ZNF33B	ZNF33B	0.000180001	1.16724	1	1	1	0.637468	0.268609	0.368859	acute_vs_healthy	Basal-Prolif
FAM210A	FAM210A	0.000185705	0.781566	1	1	1	0.796104	0.489696	0.306408	acute_vs_healthy	Basal-Prolif
ETNK1.AS2	ETNK1	0.000185969	-1.80359	1	1	1	0.112415	0.459936	-0.347521	acute_vs_healthy	Basal-Prolif
RNF213	RNF213	0.00026041	1.11973	1	1	1	0.489529	0.184394	0.305135	acute_vs_healthy	Basal-Prolif
SBF2-AS1	SBF2-AS1	0.00028591	-1.84938	1	1	1	0.142401	0.496168	-0.353767	acute_vs_healthy	Basal-Prolif
PPHLN1.AS2	PPHLN1	0.00030788	1.36104	1	1	1	0.532925	0.179623	0.353302	acute_vs_healthy	Basal-Prolif
UBE3A	UBE3A	0.000309091	0.94356	1	1	1	0.899746	0.508404	0.391342	acute_vs_healthy	Basal-Prolif
DONSON	DONSON	0.000327403	1.20623	1	1	1	0.7453	0.306216	0.439084	acute_vs_healthy	Basal-Prolif
TDP1.AS4	TDP1	0.000399318	-1.1315	1	1	1	0.420073	0.814013	-0.39394	acute_vs_healthy	Basal-Prolif
ZSCAN32	ZSCAN32	0.000470966	0.970216	1	1	1	0.562553	0.22226	0.340293	acute_vs_healthy	Basal-Prolif
KDM1A	KDM1A	0.000799308	-1.14567	1	1	1	0.430881	0.817081	-0.3862	acute_vs_healthy	Basal-Prolif
RAD1	RAD1	0.00123606	0.899884	1	1	1	0.765608	0.418244	0.347365	acute_vs_healthy	Basal-Prolif
PML	PML	0.00181222	0.916252	1	1	1	0.679669	0.376903	0.302766	acute_vs_healthy	Basal-Prolif
PLSCR1	PLSCR1	0.00226306	0.840585	1	1	1	0.775434	0.458387	0.317047	acute_vs_healthy	Basal-Prolif
TFAP2A	TFAP2A	0.00269438	0.605771	1	1	1	0.929344	0.603014	0.326329	acute_vs_healthy	Basal-Prolif
POLR2D	POLR2D	0.00980964	0.729226	1	1	1	0.833671	0.499141	0.33453	acute_vs_healthy	Basal-Prolif
STIL	STIL	0.0121025	-1.16415	1	1	1	0.373072	0.768133	-0.395061	acute_vs_healthy	Basal-Prolif
LRP8	LRP8	3.34298e-06	-0.910157	1	1	0.0227322	0.656155	0.999657	-0.343502	acute_vs_healthy	Immune-cell
ATR	ATR	3.34298e-06	-0.840913	1	1	0.0227322	0.679999	0.998232	-0.318234	acute_vs_healthy	Immune-cell
PTPN18	PTPN18	3.34298e-06	1.11336	1	1	0.0227322	0.780051	0.359198	0.420853	acute_vs_healthy	Immune-cell
YAP1	YAP1	3.34298e-06	3.56804	1	1	0.0227322	0.998853	0.00700456	0.991849	acute_vs_healthy	Immune-cell
ENSG00000291147.AS2	ENSG00000291147	3.34298e-06	0.903682	1	1	0.0227322	0.835101	0.462554	0.372547	acute_vs_healthy	Immune-cell
TBC1D31	TBC1D31	3.34298e-06	0.820705	1	1	0.0227322	0.989093	0.614464	0.374629	acute_vs_healthy	Immune-cell
GK.AS4	GK	3.34298e-06	1.6814	1	1	0.0227322	0.994809	0.342146	0.652663	acute_vs_healthy	Immune-cell
MACF1.AS8	MACF1	3.34298e-06	1.59459	1	1	0.0227322	0.982995	0.358801	0.624194	acute_vs_healthy	Immune-cell
PHKA1.AS2	PHKA1	3.34298e-06	3.63821	1	1	0.0227322	0.999813	0.000123446	0.99969	acute_vs_healthy	Immune-cell
ENAH.AS2	ENAH	3.34298e-06	1.02803	1	1	0.0227322	0.789718	0.390425	0.399293	acute_vs_healthy	Immune-cell
KLF7.AS2	KLF7	3.34298e-06	-2.09261	1	1	0.0227322	0.280034	0.917138	-0.637104	acute_vs_healthy	Immune-cell
ADAL.AS2	ADAL	3.34298e-06	1.55381	1	1	0.0227322	0.910735	0.325431	0.585304	acute_vs_healthy	Immune-cell
SENP5.AS2	SENP5	3.34298e-06	0.997931	1	1	0.0227322	0.99343	0.553827	0.439603	acute_vs_healthy	Immune-cell
TP53INP2	TP53INP2	3.34298e-06	3.15545	1	1	0.0227322	0.866477	0.0186946	0.847783	acute_vs_healthy	Immune-cell
TBC1D31.AS4	TBC1D31	3.34298e-06	1.99989	1	1	0.0227322	0.997758	0.263018	0.73474	acute_vs_healthy	Immune-cell
PARP11	PARP11	3.34298e-06	1.49056	1	1	0.0227322	0.493246	0.10102	0.392226	acute_vs_healthy	Immune-cell
SPECC1.AS2	SPECC1	3.34298e-06	1.61668	1	1	0.0227322	0.999656	0.362924	0.636732	acute_vs_healthy	Immune-cell
CEMIP2	CEMIP2	3.34298e-06	-1.56123	1	1	0.0227322	0.315174	0.758442	-0.443268	acute_vs_healthy	Immune-cell
KMT2A.AS3	KMT2A	3.34298e-06	-0.942853	1	1	0.0227322	0.640051	0.993548	-0.353498	acute_vs_healthy	Immune-cell
NEMP1.AS2	NEMP1	3.34298e-06	1.64235	1	1	0.0227322	0.88592	0.287963	0.597957	acute_vs_healthy	Immune-cell
SLC28A3	SLC28A3	3.34298e-06	3.63811	1	1	0.0227322	0.99977	0.000123641	0.999647	acute_vs_healthy	Immune-cell
ARHGAP12	ARHGAP12	4.00547e-06	-3.6186	1	1	0.0272372	0.0627957	0.883872	-0.821076	acute_vs_healthy	Immune-cell
ENSG00000291129	ENSG00000291129	4.00547e-06	-1.22644	1	1	0.0272372	0.5461	0.994484	-0.448383	acute_vs_healthy	Immune-cell
RIC8B	RIC8B	4.00547e-06	1.46397	1	1	0.0272372	0.335632	0.024035	0.311597	acute_vs_healthy	Immune-cell
USP53	USP53	4.00547e-06	-0.824574	1	1	0.0272372	0.653084	0.955336	-0.302252	acute_vs_healthy	Immune-cell
RAD54L.AS4	RAD54L	4.00547e-06	3.41979	1	1	0.0272372	0.996493	0.0224001	0.974093	acute_vs_healthy	Immune-cell
DBF4B.AS2	DBF4B	4.00547e-06	1.51011	1	1	0.0272372	0.998289	0.390585	0.607704	acute_vs_healthy	Immune-cell
INTS6L.AS2	INTS6L	4.00547e-06	2.55781	1	1	0.0272372	0.646256	0.0217674	0.624488	acute_vs_healthy	Immune-cell
POFUT1.AS2	POFUT1	4.00547e-06	1.59621	1	1	0.0272372	0.949798	0.337975	0.611823	acute_vs_healthy	Immune-cell
TMPRSS11D	TMPRSS11D	4.50444e-06	2.88315	1	1	0.0306302	0.998209	0.0933636	0.904846	acute_vs_healthy	Immune-cell
ENSG00000290927	ENSG00000290927	4.50444e-06	3.03045	1	1	0.0306302	0.96922	0.0629813	0.906239	acute_vs_healthy	Immune-cell
LRRC27.AS2	LRRC27	4.50444e-06	2.839	1	1	0.0306302	0.9853	0.0957433	0.889556	acute_vs_healthy	Immune-cell
TBC1D31.AS2	TBC1D31	4.77244e-06	0.96277	1	1	0.0324526	0.983574	0.558523	0.425051	acute_vs_healthy	Immune-cell
BEST1	BEST1	4.77244e-06	1.78816	1	1	0.0324526	0.676597	0.144338	0.532259	acute_vs_healthy	Immune-cell
ASAP2	ASAP2	4.89123e-06	-3.86938	1	1	0.0332604	0.0388149	0.85226	-0.813446	acute_vs_healthy	Immune-cell
NUTM2A-AS1.AS3	NUTM2A-AS1	4.93136e-06	2.07211	1	1	0.0335333	0.765622	0.134501	0.631121	acute_vs_healthy	Immune-cell
PTPN3	PTPN3	5.01244e-06	-1.85537	1	1	0.0340846	0.219755	0.669466	-0.449711	acute_vs_healthy	Immune-cell
CCDC18	CCDC18	8.74696e-06	-1.48204	1	1	0.0594793	0.455141	0.980769	-0.525628	acute_vs_healthy	Immune-cell
UHRF2.AS2	UHRF2	8.74696e-06	0.712249	1	1	0.0594793	0.991431	0.657479	0.333952	acute_vs_healthy	Immune-cell
ALKBH8	ALKBH8	8.74696e-06	0.692797	1	1	0.0594793	0.999814	0.672188	0.327627	acute_vs_healthy	Immune-cell
XPR1	XPR1	8.74696e-06	0.834488	1	1	0.0594793	0.999515	0.617903	0.381612	acute_vs_healthy	Immune-cell
PAPLN	PAPLN	8.74696e-06	0.671912	1	1	0.0594793	0.998918	0.67958	0.319338	acute_vs_healthy	Immune-cell
ZNF92	ZNF92	8.74696e-06	0.752554	1	1	0.0594793	0.973329	0.626844	0.346485	acute_vs_healthy	Immune-cell
PLOD2.AS4	PLOD2	8.74696e-06	0.767186	1	1	0.0594793	0.931431	0.586555	0.344876	acute_vs_healthy	Immune-cell
TMEM164	TMEM164	8.74696e-06	-3.64489	1	1	0.0594793	0.0825143	0.999718	-0.917203	acute_vs_healthy	Immune-cell
KMT2A.AS2	KMT2A	8.74696e-06	1.52614	1	1	0.0594793	0.978473	0.375323	0.60315	acute_vs_healthy	Immune-cell
ENSG00000293105	ENSG00000293105	8.74696e-06	0.680087	1	1	0.0594793	0.88171	0.576317	0.305392	acute_vs_healthy	Immune-cell
ZNF738	ZNF738	8.74696e-06	1.5022	1	1	0.0594793	0.475419	0.09088	0.384539	acute_vs_healthy	Immune-cell
MAP2	MAP2	8.74696e-06	1.75023	1	1	0.0594793	0.93599	0.29	0.64599	acute_vs_healthy	Immune-cell
PPP1R3B-DT.AS3	PPP1R3B-DT	8.74696e-06	3.39992	1	1	0.0594793	0.948587	0.0128804	0.935706	acute_vs_healthy	Immune-cell
CNGB1	CNGB1	8.74696e-06	3.6382	1	1	0.0594793	0.999812	0.000123459	0.999688	acute_vs_healthy	Immune-cell
ERG.AS3	ERG	8.74696e-06	-1.61292	1	1	0.0594793	0.435571	0.999856	-0.564285	acute_vs_healthy	Immune-cell
TREM1	TREM1	8.74696e-06	-1.51196	1	1	0.0594793	0.463507	0.999578	-0.536071	acute_vs_healthy	Immune-cell
ADAP2.AS3	ADAP2	8.74696e-06	0.764568	1	1	0.0594793	0.995207	0.64065	0.354558	acute_vs_healthy	Immune-cell
CDKN2A	CDKN2A	8.74696e-06	2.79641	1	1	0.0594793	0.657936	0.000123464	0.657812	acute_vs_healthy	Immune-cell
HIVEP1	HIVEP1	8.74696e-06	-0.969521	1	1	0.0594793	0.622481	0.98855	-0.366069	acute_vs_healthy	Immune-cell
CYP4F11	CYP4F11	8.74696e-06	1.53175	1	1	0.0594793	0.998082	0.386103	0.611979	acute_vs_healthy	Immune-cell
PTPN20.AS5	PTPN20	8.74696e-06	2.04747	1	1	0.0594793	0.94504	0.225375	0.719665	acute_vs_healthy	Immune-cell
CAB39L	CAB39L	8.74696e-06	1.99157	1	1	0.0594793	0.456829	0.0228412	0.433987	acute_vs_healthy	Immune-cell
ODF2L.AS4	ODF2L	8.74696e-06	-0.879784	1	1	0.0594793	0.656537	0.999761	-0.343224	acute_vs_healthy	Immune-cell
FANCM.AS9	FANCM	8.74696e-06	1.08154	1	1	0.0594793	0.60769	0.251964	0.355726	acute_vs_healthy	Immune-cell
GOLIM4	GOLIM4	8.74696e-06	-2.74271	1	1	0.0594793	0.193961	0.996269	-0.802308	acute_vs_healthy	Immune-cell
NPHP3.AS3	NPHP3	8.74696e-06	-1.68236	1	1	0.0594793	0.283914	0.747392	-0.463478	acute_vs_healthy	Immune-cell
LRCH3.AS3	LRCH3	8.74696e-06	-0.862905	1	1	0.0594793	0.653266	0.973653	-0.320387	acute_vs_healthy	Immune-cell
SH3TC1.AS4	SH3TC1	8.74696e-06	3.5057	1	1	0.0594793	0.999222	0.0136424	0.985579	acute_vs_healthy	Immune-cell
SCAI.AS2	SCAI	1.01832e-05	-3.50717	1	1	0.069246	0.0858945	0.950892	-0.864997	acute_vs_healthy	Immune-cell
CHORDC1	CHORDC1	1.01832e-05	-3.94874	1	1	0.069246	0.0238253	0.786081	-0.762255	acute_vs_healthy	Immune-cell
ZNF227	ZNF227	1.01832e-05	0.667052	1	1	0.069246	0.993385	0.676703	0.316682	acute_vs_healthy	Immune-cell
FAM221A.AS4	FAM221A	1.01832e-05	-1.70018	1	1	0.069246	0.228102	0.625257	-0.397155	acute_vs_healthy	Immune-cell
NRG1.AS2	NRG1	1.12424e-05	2.5662	1	1	0.0764482	0.703531	0.0401251	0.663406	acute_vs_healthy	Immune-cell
NIPAL1	NIPAL1	1.12424e-05	0.811133	1	1	0.0764482	0.978641	0.609413	0.369228	acute_vs_healthy	Immune-cell
NCOA7	NCOA7	1.12424e-05	-0.882521	1	1	0.0764482	0.651847	0.993876	-0.342029	acute_vs_healthy	Immune-cell
KLHL8.AS2	KLHL8	1.12424e-05	1.40407	1	1	0.0764482	0.402254	0.0726596	0.329594	acute_vs_healthy	Immune-cell
F3	F3	1.13213e-05	1.74201	1	1	0.0769849	0.640086	0.133314	0.506773	acute_vs_healthy	Immune-cell
ABI2.AS2	ABI2	1.13213e-05	-1.24913	1	1	0.0769849	0.373509	0.726813	-0.353304	acute_vs_healthy	Immune-cell
SIN3B	SIN3B	1.13213e-05	1.25643	1	1	0.0769849	0.85714	0.36303	0.49411	acute_vs_healthy	Immune-cell
ZMYM4	ZMYM4	1.13213e-05	3.1706	1	1	0.0769849	0.879543	0.020553	0.85899	acute_vs_healthy	Immune-cell
C12orf56	C12orf56	1.18043e-05	3.63828	1	1	0.0802693	0.999846	0.000123623	0.999722	acute_vs_healthy	Immune-cell
WDCP	WDCP	1.18043e-05	0.757667	1	1	0.0802693	0.954649	0.60928	0.345369	acute_vs_healthy	Immune-cell
LRRC8A	LRRC8A	1.18043e-05	1.35943	1	1	0.0802693	0.690428	0.240093	0.450335	acute_vs_healthy	Immune-cell
MDM1	MDM1	1.20519e-05	0.560815	1	1	0.0819532	0.990984	0.68689	0.304095	acute_vs_healthy	Immune-cell
MAP2.AS2	MAP2	1.20519e-05	1.7145	1	1	0.0819532	0.651045	0.146977	0.504068	acute_vs_healthy	Immune-cell
SHLD2	SHLD2	1.20519e-05	1.6128	1	1	0.0819532	0.42429	0.0536812	0.370609	acute_vs_healthy	Immune-cell
AKAP10	AKAP10	1.21354e-05	0.66318	1	1	0.0825208	0.975587	0.619522	0.356065	acute_vs_healthy	Immune-cell
TVP23C-CDRT4	TVP23C-CDRT4	1.23038e-05	2.19715	1	1	0.0836655	0.573305	0.0390956	0.534209	acute_vs_healthy	Immune-cell
FANCA.AS4	FANCA	1.25598e-05	2.6146	1	1	0.0854065	0.624004	0.0097669	0.614237	acute_vs_healthy	Immune-cell
HOTAIR	HOTAIR	1.7949e-05	-2.4472	1	1	0.122053	0.0785905	0.497775	-0.419184	acute_vs_healthy	Immune-cell
AVL9	AVL9	1.7949e-05	0.901228	1	1	0.122053	0.998846	0.592747	0.4061	acute_vs_healthy	Immune-cell
ZFP90	ZFP90	1.7949e-05	1.7413	1	1	0.122053	0.870405	0.255685	0.61472	acute_vs_healthy	Immune-cell
PAQR5	PAQR5	1.7949e-05	-0.88388	1	1	0.122053	0.614424	0.945154	-0.330731	acute_vs_healthy	Immune-cell
C5orf63.AS2	C5orf63	1.7949e-05	1.78078	1	1	0.122053	0.944069	0.286972	0.657098	acute_vs_healthy	Immune-cell
TNC.AS2	TNC	1.7949e-05	1.14757	1	1	0.122053	0.926672	0.453957	0.472714	acute_vs_healthy	Immune-cell
MLKL	MLKL	1.7949e-05	-2.98015	1	1	0.122053	0.0221152	0.423302	-0.401187	acute_vs_healthy	Immune-cell
SBF2.AS4	SBF2	1.7949e-05	-1.38363	1	1	0.122053	0.491126	0.998571	-0.507445	acute_vs_healthy	Immune-cell
ENSG00000291102	ENSG00000291102	1.7949e-05	1.63649	1	1	0.122053	0.320215	0.0001234	0.320092	acute_vs_healthy	Immune-cell
NETO2	NETO2	2.04858e-05	-1.66655	1	1	0.139304	0.364732	0.901891	-0.537158	acute_vs_healthy	Immune-cell
STK39	STK39	2.04858e-05	1.50192	1	1	0.139304	0.993585	0.391886	0.601699	acute_vs_healthy	Immune-cell
ACOX3	ACOX3	2.04858e-05	-0.806509	1	1	0.139304	0.669882	0.971784	-0.301902	acute_vs_healthy	Immune-cell
SLK	SLK	2.04858e-05	0.951903	1	1	0.139304	0.990595	0.550758	0.439837	acute_vs_healthy	Immune-cell
CYP20A1	CYP20A1	2.04858e-05	1.75554	1	1	0.139304	0.934454	0.287953	0.646502	acute_vs_healthy	Immune-cell
TMEM263	TMEM263	2.04858e-05	-1.89553	1	1	0.139304	0.350242	0.997228	-0.646986	acute_vs_healthy	Immune-cell
ELF2	ELF2	2.04858e-05	1.11115	1	1	0.139304	0.486773	0.162378	0.324394	acute_vs_healthy	Immune-cell
MORN4	MORN4	2.24663e-05	3.50147	1	1	0.152771	0.996202	0.0133694	0.982833	acute_vs_healthy	Immune-cell
CEP95	CEP95	2.24663e-05	1.68516	1	1	0.152771	0.414396	0.0477795	0.366617	acute_vs_healthy	Immune-cell
DNAJB6.AS2	DNAJB6	2.24663e-05	3.49877	1	1	0.152771	0.999735	0.0145057	0.985229	acute_vs_healthy	Immune-cell
BBOF1.AS3	BBOF1	2.32997e-05	2.51782	1	1	0.158438	0.980332	0.147425	0.832908	acute_vs_healthy	Immune-cell
MIRLET7BHG	MIRLET7BHG	2.32997e-05	3.08936	1	1	0.158438	0.924614	0.0423237	0.88229	acute_vs_healthy	Immune-cell
GPCPD1	GPCPD1	2.37256e-05	1.14275	1	1	0.161334	0.821598	0.380053	0.441545	acute_vs_healthy	Immune-cell
DUSP16.AS2	DUSP16	2.41575e-05	0.789425	1	1	0.164271	0.97665	0.592725	0.383926	acute_vs_healthy	Immune-cell
AMPD3	AMPD3	2.41575e-05	0.710314	1	1	0.164271	0.963059	0.618638	0.344421	acute_vs_healthy	Immune-cell
ZNF91.AS2	ZNF91	2.45956e-05	2.11567	1	1	0.16725	0.998744	0.233781	0.764963	acute_vs_healthy	Immune-cell
ANK3.AS2	ANK3	3.03598e-05	-2.41431	1	1	0.206446	0.042154	0.35053	-0.308376	acute_vs_healthy	Immune-cell
ZNF383.AS2	ZNF383	3.03598e-05	-2.02604	1	1	0.206446	0.307652	0.947341	-0.63969	acute_vs_healthy	Immune-cell
C6orf52	C6orf52	3.08843e-05	-4.11244	1	1	0.210013	0.00485711	0.704292	-0.699435	acute_vs_healthy	Immune-cell
OPA1.AS6	OPA1	3.08843e-05	1.02054	1	1	0.210013	0.643372	0.288081	0.355291	acute_vs_healthy	Immune-cell
ZSCAN5A	ZSCAN5A	3.10607e-05	1.87051	1	1	0.211213	0.570177	0.0876892	0.482487	acute_vs_healthy	Immune-cell
SBF2.AS3	SBF2	3.10607e-05	-3.54548	1	1	0.211213	0.00196111	0.476123	-0.474162	acute_vs_healthy	Immune-cell
SNRK.AS2	SNRK	3.10607e-05	1.34638	1	1	0.211213	0.963339	0.418062	0.545277	acute_vs_healthy	Immune-cell
CNTNAP3B.AS2	CNTNAP3B	3.10607e-05	-1.90106	1	1	0.211213	0.21468	0.689353	-0.474673	acute_vs_healthy	Immune-cell
ZSCAN32	ZSCAN32	3.10607e-05	2.30081	1	1	0.211213	0.633784	0.0522281	0.581556	acute_vs_healthy	Immune-cell
TDP1.AS4	TDP1	3.10607e-05	-1.60676	1	1	0.211213	0.34181	0.83677	-0.49496	acute_vs_healthy	Immune-cell
PTGER3	PTGER3	3.10607e-05	-1.58758	1	1	0.211213	0.420153	0.98898	-0.568827	acute_vs_healthy	Immune-cell
ENSG00000235978.AS2	ENSG00000235978	3.10607e-05	3.51062	1	1	0.211213	0.921312	0.000123645	0.921188	acute_vs_healthy	Immune-cell
TM4SF19-DYNLT2B	TM4SF19-DYNLT2B	3.10607e-05	2.77443	1	1	0.211213	0.668507	0.00704107	0.661466	acute_vs_healthy	Immune-cell
SENP5	SENP5	3.41826e-05	3.4207	1	1	0.232442	0.927739	0.00572361	0.922015	acute_vs_healthy	Immune-cell
MARK1.AS4	MARK1	3.47582e-05	-4.52268	1	1	0.236356	0.00499469	0.879155	-0.87416	acute_vs_healthy	Immune-cell
PPIP5K2	PPIP5K2	3.49517e-05	1.38291	1	1	0.237672	0.613231	0.190971	0.42226	acute_vs_healthy	Immune-cell
CEP68.AS2	CEP68	3.49517e-05	0.574807	1	1	0.237672	0.973127	0.665816	0.307311	acute_vs_healthy	Immune-cell
MDFI	MDFI	3.77509e-05	2.05151	1	1	0.256706	0.98879	0.246401	0.742389	acute_vs_healthy	Immune-cell
ACTR3B	ACTR3B	3.77509e-05	3.04881	1	1	0.256706	0.800226	0.01772	0.782506	acute_vs_healthy	Immune-cell
HORMAD1	HORMAD1	3.92146e-05	0.659394	1	1	0.26666	0.939695	0.6334	0.306295	acute_vs_healthy	Immune-cell
P2RX4.AS2	P2RX4	4.00707e-05	0.672678	1	1	0.272481	0.998305	0.580961	0.417343	acute_vs_healthy	Immune-cell
DMPK	DMPK	4.05042e-05	2.18982	1	1	0.275429	0.738481	0.106489	0.631992	acute_vs_healthy	Immune-cell
USP33.AS2	USP33	4.13821e-05	0.935183	1	1	0.281398	0.978895	0.51969	0.459206	acute_vs_healthy	Immune-cell
MEAK7	MEAK7	4.64791e-05	2.67141	1	1	0.316058	0.66777	0.017137	0.650633	acute_vs_healthy	Immune-cell
CHEK2	CHEK2	4.7456e-05	1.03832	1	1	0.322701	0.990199	0.537406	0.452793	acute_vs_healthy	Immune-cell
MPHOSPH9	MPHOSPH9	4.7456e-05	-1.9192	1	1	0.322701	0.336078	0.997031	-0.660953	acute_vs_healthy	Immune-cell
PLSCR1	PLSCR1	4.7456e-05	1.2073	1	1	0.322701	0.928742	0.436792	0.49195	acute_vs_healthy	Immune-cell
KANSL1	KANSL1	5.25818e-05	-4.85179	1	1	0.357556	0.00142944	0.99443	-0.993001	acute_vs_healthy	Immune-cell
ACAD10	ACAD10	5.28489e-05	0.60775	1	1	0.359372	0.992277	0.684421	0.307856	acute_vs_healthy	Immune-cell
SPIDR	SPIDR	5.28489e-05	0.657498	1	1	0.359372	0.860303	0.553556	0.306747	acute_vs_healthy	Immune-cell
CCDC66.AS3	CCDC66	5.28489e-05	0.615151	1	1	0.359372	0.973592	0.65659	0.317003	acute_vs_healthy	Immune-cell
PVT1.AS3	PVT1	5.55779e-05	1.66177	1	1	0.37793	0.322897	0.00558801	0.317309	acute_vs_healthy	Immune-cell
DENND1B.AS2	DENND1B	5.58567e-05	-3.25863	1	1	0.379825	0.00982385	0.438126	-0.428302	acute_vs_healthy	Immune-cell
TMEM260	TMEM260	5.84145e-05	1.88325	1	1	0.397219	0.820669	0.197943	0.622726	acute_vs_healthy	Immune-cell
GLIPR1.AS2	GLIPR1	5.9874e-05	0.976832	1	1	0.407143	0.999124	0.541783	0.457341	acute_vs_healthy	Immune-cell
ENSG00000291100.AS2	ENSG00000291100	6.13615e-05	3.14054	1	1	0.417258	0.936669	0.0405177	0.896151	acute_vs_healthy	Immune-cell
RUBCN.AS2	RUBCN	6.28772e-05	-4.44431	1	1	0.427565	0.00304283	0.825995	-0.822953	acute_vs_healthy	Immune-cell
ZFYVE16	ZFYVE16	6.95602e-05	-4.05197	1	1	0.473009	0.0365396	0.921007	-0.884468	acute_vs_healthy	Immune-cell
PUM2.AS4	PUM2	6.95602e-05	-3.22495	1	1	0.473009	0.00122819	0.334283	-0.333054	acute_vs_healthy	Immune-cell
STRN3.AS2	STRN3	7.08926e-05	2.1448	1	1	0.48207	0.602323	0.0565091	0.545814	acute_vs_healthy	Immune-cell
CDNF	CDNF	7.25855e-05	0.729637	1	1	0.493582	0.95503	0.620022	0.335009	acute_vs_healthy	Immune-cell
TIRAP	TIRAP	7.25855e-05	-3.08073	1	1	0.493582	0.0719771	0.701775	-0.629797	acute_vs_healthy	Immune-cell
ADGRE5	ADGRE5	7.29278e-05	3.37448	1	1	0.495909	0.892652	0.00677567	0.885876	acute_vs_healthy	Immune-cell
MAT1A	MAT1A	7.78504e-05	-1.52766	1	1	0.529383	0.453706	0.999614	-0.545908	acute_vs_healthy	Immune-cell
STIL	STIL	8.00361e-05	-2.14067	1	1	0.544245	0.253907	0.877396	-0.623489	acute_vs_healthy	Immune-cell
CREBBP	CREBBP	8.11463e-05	-1.42175	1	1	0.551795	0.384344	0.824242	-0.439898	acute_vs_healthy	Immune-cell
CCDC7.AS5	CCDC7	8.11463e-05	-3.20725	1	1	0.551795	0.128246	0.992569	-0.864323	acute_vs_healthy	Immune-cell
NEDD4L.AS2	NEDD4L	8.1519e-05	-3.82385	1	1	0.554329	0.0386044	0.833236	-0.794632	acute_vs_healthy	Immune-cell
ALDH3B1	ALDH3B1	8.26449e-05	-4.6311	1	1	0.561985	0.000145531	0.878471	-0.878326	acute_vs_healthy	Immune-cell
DTNB.AS2	DTNB	8.37826e-05	1.6034	1	1	0.569722	0.741957	0.219261	0.522696	acute_vs_healthy	Immune-cell
CARD14	CARD14	8.92503e-05	1.62489	1	1	0.606902	0.601003	0.135021	0.465982	acute_vs_healthy	Immune-cell
WDPCP	WDPCP	8.92503e-05	0.782837	1	1	0.606902	0.954201	0.599789	0.354411	acute_vs_healthy	Immune-cell
TCF7L2	TCF7L2	8.92503e-05	-4.63401	1	1	0.606902	0.00235233	0.903203	-0.900851	acute_vs_healthy	Immune-cell
MYO5A.AS7	MYO5A	8.92503e-05	-3.48872	1	1	0.606902	0.0715876	0.885797	-0.814209	acute_vs_healthy	Immune-cell
CSPP1.AS5	CSPP1	9.16749e-05	2.41317	1	1	0.623389	0.664985	0.0448809	0.620104	acute_vs_healthy	Immune-cell
EXOG.AS2	EXOG	9.54052e-05	-1.82066	1	1	0.648755	0.128937	0.447649	-0.318712	acute_vs_healthy	Immune-cell
ATF7IP2.AS2	ATF7IP2	9.54052e-05	-3.24211	1	1	0.648755	0.0864941	0.834797	-0.748303	acute_vs_healthy	Immune-cell
RALGPS1	RALGPS1	9.54052e-05	2.20171	1	1	0.648755	0.926925	0.184523	0.742402	acute_vs_healthy	Immune-cell
ENSG00000246090	ENSG00000246090	9.54052e-05	-2.03095	1	1	0.648755	0.312407	0.998158	-0.685751	acute_vs_healthy	Immune-cell
ADGRE2	ADGRE2	9.79552e-05	-3.61249	1	1	0.666095	0.0850384	0.996208	-0.911169	acute_vs_healthy	Immune-cell
TMEM260.AS2	TMEM260	9.79552e-05	-2.40232	1	1	0.666095	0.181447	0.806169	-0.624722	acute_vs_healthy	Immune-cell
CLHC1.AS2	CLHC1	0.000102215	-1.3947	1	1	0.695059	0.47519	0.980832	-0.505642	acute_vs_healthy	Immune-cell
SKA3	SKA3	0.000102215	0.771024	1	1	0.695059	0.92674	0.598272	0.328468	acute_vs_healthy	Immune-cell
FAM13A.AS2	FAM13A	0.000102215	-1.41919	1	1	0.695059	0.452469	0.957244	-0.504775	acute_vs_healthy	Immune-cell
RASGEF1B.AS2	RASGEF1B	0.000102215	-1.03151	1	1	0.695059	0.593271	0.97892	-0.385649	acute_vs_healthy	Immune-cell
ZNF383	ZNF383	0.000102215	0.923381	1	1	0.695059	0.562623	0.259499	0.303124	acute_vs_healthy	Immune-cell
FOCAD.AS2	FOCAD	0.000102215	1.64951	1	1	0.695059	0.934214	0.326518	0.607696	acute_vs_healthy	Immune-cell
METAP1D	METAP1D	0.000104106	-4.08248	1	1	0.70792	0.0253941	0.855139	-0.829745	acute_vs_healthy	Immune-cell
BCORL1.AS2	BCORL1	0.000104106	1.83984	1	1	0.70792	0.929941	0.264915	0.665026	acute_vs_healthy	Immune-cell
DCAF10	DCAF10	0.00010914	0.723444	1	1	0.742151	0.911048	0.563926	0.347122	acute_vs_healthy	Immune-cell
HCK.AS2	HCK	0.000111962	-2.20214	1	1	0.76134	0.105846	0.499848	-0.394002	acute_vs_healthy	Immune-cell
KDM1A	KDM1A	0.00011581	-1.80395	1	1	0.787505	0.33711	0.905996	-0.568886	acute_vs_healthy	Immune-cell
CNTRL.AS4	CNTRL	0.00011581	1.7371	1	1	0.787505	0.989924	0.316818	0.673107	acute_vs_healthy	Immune-cell
PRELID3A.AS2	PRELID3A	0.00011581	-3.58966	1	1	0.787505	0.085646	0.988104	-0.902458	acute_vs_healthy	Immune-cell
MAFTRR.AS3	MAFTRR	0.000116298	-4.39151	1	1	0.790823	0.0252844	0.995865	-0.970581	acute_vs_healthy	Immune-cell
CCDC77	CCDC77	0.000120758	-3.36849	1	1	0.821157	0.106681	0.983176	-0.876495	acute_vs_healthy	Immune-cell
DYRK3	DYRK3	0.000123292	-4.51192	1	1	0.838382	0.000168402	0.827212	-0.827044	acute_vs_healthy	Immune-cell
AGPAT3	AGPAT3	0.000127951	-2.31141	1	1	0.87007	0.119699	0.576797	-0.457098	acute_vs_healthy	Immune-cell
SEPTIN9.AS2	SEPTIN9	0.000132203	0.939386	1	1	0.898983	0.983148	0.555655	0.427493	acute_vs_healthy	Immune-cell
AHI1.AS10	AHI1	0.000138369	2.70464	1	1	0.940907	0.923339	0.0989655	0.824373	acute_vs_healthy	Immune-cell
MBNL3	MBNL3	0.000139898	-2.30156	1	1	0.951305	0.0808606	0.427168	-0.346308	acute_vs_healthy	Immune-cell
CLEC7A	CLEC7A	0.000145018	-2.46347	1	1	0.98612	0.185613	0.999839	-0.814227	acute_vs_healthy	Immune-cell
STXBP5	STXBP5	0.000145258	-0.78381	1	1	0.987756	0.658716	0.962347	-0.303631	acute_vs_healthy	Immune-cell
N4BP1	N4BP1	0.000151464	2.86467	1	1	1	0.943678	0.0779018	0.865776	acute_vs_healthy	Immune-cell
ETFDH	ETFDH	0.000156451	1.10259	1	1	1	0.934963	0.45619	0.478773	acute_vs_healthy	Immune-cell
KLC1	KLC1	0.000167546	2.13237	1	1	1	0.386321	0.00145683	0.384864	acute_vs_healthy	Immune-cell
TMEM116	TMEM116	0.000178226	1.91386	1	1	1	0.726502	0.153489	0.573013	acute_vs_healthy	Immune-cell
ATPSCKMT	ATPSCKMT	0.000178226	-1.56405	1	1	1	0.424229	0.978966	-0.554737	acute_vs_healthy	Immune-cell
IRAK4.AS3	IRAK4	0.000178226	-1.59832	1	1	1	0.331093	0.835283	-0.504191	acute_vs_healthy	Immune-cell
ZCWPW1.AS2	ZCWPW1	0.000178226	2.65881	1	1	1	0.614033	0.00565858	0.608375	acute_vs_healthy	Immune-cell
PLEKHG3	PLEKHG3	0.000178226	-1.67265	1	1	1	0.321523	0.847818	-0.526295	acute_vs_healthy	Immune-cell
TLK2.AS8	TLK2	0.000178226	1.03488	1	1	1	0.874451	0.458415	0.416035	acute_vs_healthy	Immune-cell
GCH1.AS2	GCH1	0.000186181	2.05404	1	1	1	0.753112	0.134881	0.618231	acute_vs_healthy	Immune-cell
G3BP2.AS6	G3BP2	0.000204948	0.718249	1	1	1	0.986198	0.614752	0.371446	acute_vs_healthy	Immune-cell
DHX30	DHX30	0.000272466	1.22787	1	1	1	0.929546	0.444645	0.484901	acute_vs_healthy	Immune-cell
CYP20A1.AS2	CYP20A1	0.000272466	1.0727	1	1	1	0.778971	0.377378	0.401593	acute_vs_healthy	Immune-cell
PPP2R3C.AS3	PPP2R3C	0.000272466	1.2874	1	1	1	0.918987	0.417293	0.501694	acute_vs_healthy	Immune-cell
ZNF613.AS3	ZNF613	0.000272466	0.72781	1	1	1	0.903498	0.594069	0.309429	acute_vs_healthy	Immune-cell
TMEM39B.AS2	TMEM39B	0.000298538	0.98804	1	1	1	0.624523	0.295666	0.328857	acute_vs_healthy	Immune-cell
PPARGC1B	PPARGC1B	0.000298538	0.926999	1	1	1	0.613611	0.29381	0.319801	acute_vs_healthy	Immune-cell
FOXN2	FOXN2	0.000324999	-1.31563	1	1	1	0.273837	0.624589	-0.350752	acute_vs_healthy	Immune-cell
CHD1.AS2	CHD1	0.000330883	-1.99837	1	1	1	0.195562	0.710214	-0.514652	acute_vs_healthy	Immune-cell
MROH1	MROH1	0.000411226	2.21038	1	1	1	0.531553	0.0303957	0.501157	acute_vs_healthy	Immune-cell
NAAA	NAAA	0.000415184	1.79542	1	1	1	0.580065	0.108242	0.471824	acute_vs_healthy	Immune-cell
NDUFAF5.AS2	NDUFAF5	0.000415184	-2.07787	1	1	1	0.0895786	0.456222	-0.366643	acute_vs_healthy	Immune-cell
SUGT1	SUGT1	0.000415184	1.98925	1	1	1	0.435037	0.0315593	0.403477	acute_vs_healthy	Immune-cell
ARMCX4	ARMCX4	0.000470487	-1.68073	1	1	1	0.121062	0.454646	-0.333584	acute_vs_healthy	Immune-cell
SYNRG.AS2	SYNRG	0.000486647	-0.819272	1	1	1	0.655598	0.978225	-0.322627	acute_vs_healthy	Immune-cell
DONSON	DONSON	0.000486647	1.63471	1	1	1	0.738867	0.214556	0.52431	acute_vs_healthy	Immune-cell
FGGY.AS10	FGGY	0.000488467	1.4991	1	1	1	0.802929	0.287789	0.51514	acute_vs_healthy	Immune-cell
ETNK1.AS2	ETNK1	0.00049228	-2.28775	1	1	1	0.0840444	0.561797	-0.477752	acute_vs_healthy	Immune-cell
ADISSP	ADISSP	0.000516588	0.619892	1	1	1	0.987596	0.58642	0.401176	acute_vs_healthy	Immune-cell
PRMT7	PRMT7	0.000539506	-0.830426	1	1	1	0.585325	0.889456	-0.304131	acute_vs_healthy	Immune-cell
AADACL2	AADACL2	0.000568145	-2.08929	1	1	1	0.210662	0.813986	-0.603324	acute_vs_healthy	Immune-cell
ENSG00000291055.AS2	ENSG00000291055	0.000568145	0.788304	1	1	1	0.765042	0.434055	0.330987	acute_vs_healthy	Immune-cell
ENSG00000290927.AS3	ENSG00000290927	0.000617239	-1.46085	1	1	1	0.220103	0.585799	-0.365695	acute_vs_healthy	Immune-cell
DZIP1L	DZIP1L	0.000628565	1.87536	1	1	1	0.376534	0.0111043	0.36543	acute_vs_healthy	Immune-cell
SLC9B2.AS3	SLC9B2	0.00063905	-2.30621	1	1	1	0.204678	0.894877	-0.690199	acute_vs_healthy	Immune-cell
UQCC6.AS2	UQCC6	0.000700004	-1.41367	1	1	1	0.355177	0.781978	-0.426801	acute_vs_healthy	Immune-cell
AUTS2.AS2	AUTS2	0.000770296	2.64862	1	1	1	0.688064	0.0285848	0.659479	acute_vs_healthy	Immune-cell
TBRG1.AS2	TBRG1	0.000772016	1.32921	1	1	1	0.635438	0.218839	0.416599	acute_vs_healthy	Immune-cell
THEM4	THEM4	0.000924604	-2.13662	1	1	1	0.106045	0.585448	-0.479403	acute_vs_healthy	Immune-cell
BTBD3	BTBD3	0.0009882	-1.84368	1	1	1	0.115124	0.487662	-0.372538	acute_vs_healthy	Immune-cell
FAM221A	FAM221A	0.00110189	0.986895	1	1	1	0.489287	0.177161	0.312126	acute_vs_healthy	Immune-cell
PPIP5K2.AS2	PPIP5K2	0.00117978	-1.38572	1	1	1	0.247392	0.622515	-0.375123	acute_vs_healthy	Immune-cell
TAF8.AS2	TAF8	0.00117978	-1.1129	1	1	1	0.501125	0.911428	-0.410303	acute_vs_healthy	Immune-cell
ECHDC2.AS4	ECHDC2	0.00148941	1.27232	1	1	1	0.813233	0.314971	0.498262	acute_vs_healthy	Immune-cell
SBF2-AS1	SBF2-AS1	0.00153191	-1.40249	1	1	1	0.198409	0.563356	-0.364947	acute_vs_healthy	Immune-cell
MFSD4B	MFSD4B	0.00168396	-1.48053	1	1	1	0.374284	0.796942	-0.422658	acute_vs_healthy	Immune-cell
IGF2BP2	IGF2BP2	0.00184083	2.39248	1	1	1	0.626208	0.0425357	0.583673	acute_vs_healthy	Immune-cell
NLRP1	NLRP1	0.00189626	2.0186	1	1	1	0.576655	0.0754232	0.501232	acute_vs_healthy	Immune-cell
IRX4	IRX4	0.00192205	-1.81746	1	1	1	0.118244	0.441298	-0.323054	acute_vs_healthy	Immune-cell
FANCI.AS3	FANCI	0.00196282	-3.63455	1	1	1	0.0104255	0.53321	-0.522785	acute_vs_healthy	Immune-cell
KITLG	KITLG	0.00197087	0.73436	1	1	1	0.896912	0.554293	0.342619	acute_vs_healthy	Immune-cell
CSNK1D.AS2	CSNK1D	0.00204354	1.17003	1	1	1	0.867281	0.396396	0.470885	acute_vs_healthy	Immune-cell
ECE1	ECE1	0.00205771	0.724241	1	1	1	0.759344	0.448008	0.311336	acute_vs_healthy	Immune-cell
PABIR2	PABIR2	0.00211473	1.70485	1	1	1	0.583354	0.121628	0.461726	acute_vs_healthy	Immune-cell
ATAT1	ATAT1	0.00216645	1.46031	1	1	1	0.886943	0.285861	0.601082	acute_vs_healthy	Immune-cell
TLN1	TLN1	0.00220107	1.51948	1	1	1	0.796244	0.280483	0.51576	acute_vs_healthy	Immune-cell
MIA2	MIA2	0.00251985	-1.93819	1	1	1	0.209853	0.666464	-0.45661	acute_vs_healthy	Immune-cell
DAAM1	DAAM1	0.00255971	0.639679	1	1	1	0.992295	0.631248	0.361047	acute_vs_healthy	Immune-cell
MUC15	MUC15	0.00277806	1.57668	1	1	1	0.341594	0.0330673	0.308527	acute_vs_healthy	Immune-cell
CCDC126	CCDC126	0.00284764	1.13859	1	1	1	0.821964	0.408631	0.413333	acute_vs_healthy	Immune-cell
RAD1	RAD1	0.00290918	1.35122	1	1	1	0.713803	0.266072	0.447731	acute_vs_healthy	Immune-cell
TNIP1.AS4	TNIP1	0.00301519	0.772532	1	1	1	0.979234	0.56187	0.417364	acute_vs_healthy	Immune-cell
UPF3B	UPF3B	0.00301739	1.74772	1	1	1	0.560847	0.106795	0.454052	acute_vs_healthy	Immune-cell
ZNF655	ZNF655	0.00301739	0.674777	1	1	1	0.932752	0.609053	0.3237	acute_vs_healthy	Immune-cell
ENDOV.AS4	ENDOV	0.00330483	1.25744	1	1	1	0.652375	0.25761	0.394765	acute_vs_healthy	Immune-cell
RNF213	RNF213	0.00334473	1.89753	1	1	1	0.520873	0.0764879	0.444385	acute_vs_healthy	Immune-cell
CACTIN	CACTIN	0.00441861	1.18612	1	1	1	0.743102	0.263749	0.479353	acute_vs_healthy	Immune-cell
ZNF502	ZNF502	0.00452384	-4.02364	1	1	1	0.0287873	0.811374	-0.782587	acute_vs_healthy	Immune-cell
ADPGK.AS3	ADPGK	0.00528021	0.887419	1	1	1	0.643992	0.343451	0.30054	acute_vs_healthy	Immune-cell
TUBD1.AS6	TUBD1	0.00539544	0.991152	1	1	1	0.96324	0.510112	0.453128	acute_vs_healthy	Immune-cell
ANKRD12.AS2	ANKRD12	0.00575759	1.18257	1	1	1	0.651984	0.259754	0.392231	acute_vs_healthy	Immune-cell
NRIP1	NRIP1	0.00624217	1.62843	1	1	1	0.770675	0.159133	0.611542	acute_vs_healthy	Immune-cell
SVIL	SVIL	0.00772518	-2.61312	1	1	1	0.0610419	0.57039	-0.509348	acute_vs_healthy	Immune-cell
ZNF33B	ZNF33B	0.00804967	0.761261	1	1	1	0.622765	0.303445	0.31932	acute_vs_healthy	Immune-cell
RHOC	RHOC	0.00815103	0.981066	1	1	1	0.688542	0.305089	0.383454	acute_vs_healthy	Immune-cell
PPHLN1.AS2	PPHLN1	0.00908784	2.03119	1	1	1	0.447009	0.0295744	0.417435	acute_vs_healthy	Immune-cell
SRPK2.AS2	SRPK2	0.0100956	-1.08711	1	1	1	0.468762	0.879794	-0.411032	acute_vs_healthy	Immune-cell
ANKRD26.AS5	ANKRD26	0.0104427	-1.29555	1	1	1	0.400136	0.786579	-0.386442	acute_vs_healthy	Immune-cell
MACF1.AS2	MACF1	0.0106498	1.65577	1	1	1	0.50195	0.102074	0.399877	acute_vs_healthy	Immune-cell
NME6	NME6	0.0114505	-0.926677	1	1	1	0.485751	0.800513	-0.314762	acute_vs_healthy	Immune-cell
ST7L.AS3	ST7L	0.0122593	0.838295	1	1	1	0.483426	0.17404	0.309385	acute_vs_healthy	Immune-cell
PML	PML	0.0124684	0.711993	1	1	1	0.763258	0.4558	0.307458	acute_vs_healthy	Immune-cell
LTBP4.AS2	LTBP4	0.0153506	0.92554	1	1	1	0.607335	0.247966	0.359368	acute_vs_healthy	Immune-cell
TSGA10.AS2	TSGA10	0.0165335	-1.81303	1	1	1	0.0722054	0.385385	-0.31318	acute_vs_healthy	Immune-cell
EPB41L1.AS5	EPB41L1	0.0172933	-1.50059	1	1	1	0.198566	0.518307	-0.319741	acute_vs_healthy	Immune-cell
NABP1	NABP1	0.0174319	-0.967241	1	1	1	0.551818	0.908947	-0.357128	acute_vs_healthy	Immune-cell
CD44.AS2	CD44	0.0176387	1.26967	1	1	1	0.591752	0.208307	0.383445	acute_vs_healthy	Immune-cell
LINC01550	LINC01550	0.0177073	1.28563	1	1	1	0.606433	0.229673	0.376761	acute_vs_healthy	Immune-cell
HDDC2	HDDC2	0.0187903	-1.0864	1	1	1	0.338412	0.660326	-0.321913	acute_vs_healthy	Immune-cell
SLC66A2	SLC66A2	0.0192492	1.11818	1	1	1	0.621608	0.216828	0.404781	acute_vs_healthy	Immune-cell
NDUFAF7.AS2	NDUFAF7	0.0198773	-1.51992	1	1	1	0.250734	0.623653	-0.372919	acute_vs_healthy	Immune-cell
CCND3	CCND3	0.0210957	0.606256	1	1	1	0.991067	0.616936	0.374131	acute_vs_healthy	Immune-cell
EGLN1	EGLN1	0.0252007	1.12204	1	1	1	0.514517	0.157482	0.357036	acute_vs_healthy	Immune-cell
POLR2D	POLR2D	0.0326314	0.85127	1	1	1	0.862378	0.473272	0.389106	acute_vs_healthy	Immune-cell
UBE3A	UBE3A	0.0329084	0.747735	1	1	1	0.980811	0.588779	0.392032	acute_vs_healthy	Immune-cell
TCOF1.AS2	TCOF1	0.0481753	1.47505	1	1	1	0.700742	0.179681	0.521061	acute_vs_healthy	Immune-cell
WDR26.AS2	WDR26	0.0495483	1.14546	1	1	1	0.571964	0.201211	0.370753	acute_vs_healthy	Immune-cell
KITLG	KITLG	8.62558e-18	1.23682	1	1	5.86539e-14	0.886912	0.485652	0.40126	acute_vs_healthy	Melanocyte
CCDC18	CCDC18	8.62558e-18	-1.25199	1	1	5.86539e-14	0.484304	0.980769	-0.496465	acute_vs_healthy	Melanocyte
GLIPR1.AS2	GLIPR1	8.62558e-18	1.49327	1	1	5.86539e-14	0.999097	0.4844	0.514697	acute_vs_healthy	Melanocyte
TBC1D31	TBC1D31	8.62558e-18	1.03548	1	1	5.86539e-14	0.989093	0.614464	0.374629	acute_vs_healthy	Melanocyte
TMEM164	TMEM164	8.62558e-18	-3.30875	1	1	5.86539e-14	0.0876411	0.999718	-0.912077	acute_vs_healthy	Melanocyte
SKA3	SKA3	8.62558e-18	1.08051	1	1	5.86539e-14	0.986631	0.598272	0.388359	acute_vs_healthy	Melanocyte
PPP1R3B-DT.AS3	PPP1R3B-DT	8.62558e-18	5.84459	1	1	5.86539e-14	0.945359	0.0128804	0.932478	acute_vs_healthy	Melanocyte
PHKA1.AS2	PHKA1	8.62558e-18	6.81499	1	1	5.86539e-14	0.999813	0.000123446	0.99969	acute_vs_healthy	Melanocyte
MLKL	MLKL	8.62558e-18	-2.32046	1	1	5.86539e-14	0.025035	0.423302	-0.398267	acute_vs_healthy	Melanocyte
PTGER3	PTGER3	8.62558e-18	-1.49003	1	1	5.86539e-14	0.420962	0.98898	-0.568017	acute_vs_healthy	Melanocyte
ENSG00000235978.AS2	ENSG00000235978	8.62558e-18	6.77168	1	1	5.86539e-14	0.980027	0.000123645	0.979904	acute_vs_healthy	Melanocyte
TM4SF19-DYNLT2B	TM4SF19-DYNLT2B	8.62558e-18	5.60061	1	1	5.86539e-14	0.707909	0.00704107	0.700868	acute_vs_healthy	Melanocyte
FAM13A.AS2	FAM13A	9.40814e-18	-1.54205	1	1	6.39753e-14	0.381509	0.957244	-0.575735	acute_vs_healthy	Melanocyte
ERG.AS3	ERG	9.40814e-18	-1.46236	1	1	6.39753e-14	0.435571	0.999856	-0.564285	acute_vs_healthy	Melanocyte
CYP4F11	CYP4F11	9.40814e-18	1.8828	1	1	6.39753e-14	0.998082	0.386103	0.61198	acute_vs_healthy	Melanocyte
RASGEF1B.AS2	RASGEF1B	9.40814e-18	-1.09715	1	1	6.39753e-14	0.520877	0.97892	-0.458042	acute_vs_healthy	Melanocyte
SH3TC1.AS4	SH3TC1	9.40814e-18	5.92543	1	1	6.39753e-14	0.999224	0.0136424	0.985581	acute_vs_healthy	Melanocyte
RALGPS1	RALGPS1	1.18983e-17	2.86381	1	1	8.09085e-14	0.917295	0.184523	0.732771	acute_vs_healthy	Melanocyte
XPR1	XPR1	9.61086e-17	1.02893	1	1	6.53538e-13	0.999518	0.623087	0.376431	acute_vs_healthy	Melanocyte
YAP1	YAP1	9.61086e-17	5.30199	1	1	6.53538e-13	0.998853	0.0210277	0.977826	acute_vs_healthy	Melanocyte
CNGB1	CNGB1	9.61086e-17	6.81499	1	1	6.53538e-13	0.999815	0.000123459	0.999691	acute_vs_healthy	Melanocyte
NLGN4Y	NLGN4Y	9.61086e-17	0.819858	1	1	6.53538e-13	0.984322	0.683459	0.300863	acute_vs_healthy	Melanocyte
TREM1	TREM1	9.61086e-17	-1.35857	1	1	6.53538e-13	0.465295	0.999578	-0.534283	acute_vs_healthy	Melanocyte
ADAP2.AS3	ADAP2	9.61086e-17	0.971866	1	1	6.53538e-13	0.99514	0.639695	0.355446	acute_vs_healthy	Melanocyte
KIFC1	KIFC1	9.61086e-17	-0.67346	1	1	6.53538e-13	0.677211	0.978887	-0.301676	acute_vs_healthy	Melanocyte
TBC1D31.AS4	TBC1D31	9.61086e-17	2.50311	1	1	6.53538e-13	0.997758	0.263018	0.73474	acute_vs_healthy	Melanocyte
SVIL	SVIL	9.61086e-17	-3.42356	1	1	6.53538e-13	0.00721911	0.670041	-0.662822	acute_vs_healthy	Melanocyte
SLC28A3	SLC28A3	9.61086e-17	6.81488	1	1	6.53538e-13	0.99977	0.000123637	0.999647	acute_vs_healthy	Melanocyte
CDKN2A	CDKN2A	1.03707e-16	5.98635	1	1	7.05206e-13	0.657936	0.000123463	0.657812	acute_vs_healthy	Melanocyte
ANK3.AS2	ANK3	1.03707e-16	-1.8508	1	1	7.05206e-13	0.042154	0.360684	-0.31853	acute_vs_healthy	Melanocyte
FANCM.AS9	FANCM	1.10468e-16	1.77538	1	1	7.5118e-13	0.650119	0.248995	0.401124	acute_vs_healthy	Melanocyte
ENSG00000293105	ENSG00000293105	1.16306e-16	0.979453	1	1	7.90883e-13	0.899404	0.567414	0.33199	acute_vs_healthy	Melanocyte
DTNB.AS2	DTNB	1.19811e-16	2.03811	1	1	8.14716e-13	0.683781	0.217749	0.466033	acute_vs_healthy	Melanocyte
MAT1A	MAT1A	1.20634e-16	-1.39623	1	1	8.20312e-13	0.448778	0.999618	-0.550841	acute_vs_healthy	Melanocyte
CHEK2	CHEK2	1.21186e-16	1.31258	1	1	8.24062e-13	0.994007	0.531338	0.462669	acute_vs_healthy	Melanocyte
CLEC7A	CLEC7A	1.22296e-16	-3.3597	1	1	8.31611e-13	0.082094	0.999838	-0.917744	acute_vs_healthy	Melanocyte
ATF7IP2.AS2	ATF7IP2	1.22296e-16	-2.90036	1	1	8.31611e-13	0.0901463	0.837309	-0.747162	acute_vs_healthy	Melanocyte
STIL	STIL	1.22296e-16	-1.88319	1	1	8.31611e-13	0.253907	0.857731	-0.603823	acute_vs_healthy	Melanocyte
METAP1D	METAP1D	1.23697e-16	-3.64852	1	1	8.41139e-13	0.0253941	0.855139	-0.829745	acute_vs_healthy	Melanocyte
PAPLN	PAPLN	7.52013e-16	0.857954	1	1	5.11369e-12	0.998945	0.67995	0.318995	acute_vs_healthy	Melanocyte
CEMIP2	CEMIP2	7.52013e-16	-1.34924	1	1	5.11369e-12	0.315174	0.760578	-0.445403	acute_vs_healthy	Melanocyte
ATR	ATR	8.04508e-16	-0.76749	1	1	5.47066e-12	0.655837	0.998181	-0.342344	acute_vs_healthy	Melanocyte
CNTNAP3B.AS2	CNTNAP3B	8.04508e-16	-1.55991	1	1	5.47066e-12	0.231254	0.691717	-0.460463	acute_vs_healthy	Melanocyte
MACF1.AS8	MACF1	8.50865e-16	1.98659	1	1	5.78588e-12	0.985495	0.356826	0.628669	acute_vs_healthy	Melanocyte
SPATA7.AS5	SPATA7	8.50865e-16	-0.784613	1	1	5.78588e-12	0.542924	0.879847	-0.336923	acute_vs_healthy	Melanocyte
SPECC1.AS2	SPECC1	8.90648e-16	1.99518	1	1	6.05641e-12	0.999652	0.361675	0.637977	acute_vs_healthy	Melanocyte
ZNF502	ZNF502	9.40694e-16	-3.85208	1	1	6.39672e-12	0.0264926	0.946057	-0.919564	acute_vs_healthy	Melanocyte
PTPN20.AS5	PTPN20	4.43552e-15	2.63544	1	1	3.01616e-11	0.94256	0.222649	0.719911	acute_vs_healthy	Melanocyte
INTS6L.AS2	INTS6L	4.43552e-15	4.63533	1	1	3.01616e-11	0.646256	0.0237372	0.622518	acute_vs_healthy	Melanocyte
LRP8	LRP8	4.71201e-15	-0.720245	1	1	3.20417e-11	0.675248	0.999657	-0.324409	acute_vs_healthy	Melanocyte
SBF2.AS4	SBF2	4.71201e-15	-1.21444	1	1	3.20417e-11	0.500272	0.998593	-0.498321	acute_vs_healthy	Melanocyte
KMT2A.AS2	KMT2A	4.74472e-15	1.86441	1	1	3.22641e-11	0.985414	0.379231	0.606183	acute_vs_healthy	Melanocyte
FRMD6	FRMD6	4.95015e-15	-0.864197	1	1	3.3661e-11	0.36966	0.671193	-0.301534	acute_vs_healthy	Melanocyte
UHRF2.AS2	UHRF2	4.95467e-15	0.935445	1	1	3.36917e-11	0.989927	0.641854	0.348073	acute_vs_healthy	Melanocyte
ALKBH8	ALKBH8	4.95467e-15	0.913592	1	1	3.36917e-11	0.999814	0.660088	0.339726	acute_vs_healthy	Melanocyte
AVL9	AVL9	4.95467e-15	1.10673	1	1	3.36917e-11	0.998847	0.597041	0.401807	acute_vs_healthy	Melanocyte
ENAH.AS2	ENAH	5.33341e-15	1.41369	1	1	3.62672e-11	0.784849	0.380875	0.403974	acute_vs_healthy	Melanocyte
CCDC7.AS5	CCDC7	5.42117e-15	-3.03611	1	1	3.6864e-11	0.117859	0.992894	-0.875034	acute_vs_healthy	Melanocyte
DYRK3	DYRK3	5.69265e-15	-3.98088	1	1	3.871e-11	0.000168368	0.833593	-0.833425	acute_vs_healthy	Melanocyte
PPARGC1B	PPARGC1B	6.0735e-15	1.43449	1	1	4.12998e-11	0.662167	0.307698	0.354469	acute_vs_healthy	Melanocyte
CDNF	CDNF	6.24382e-15	0.933095	1	1	4.2458e-11	0.958665	0.624746	0.333918	acute_vs_healthy	Melanocyte
NEMP1.AS2	NEMP1	2.07949e-14	2.09227	1	1	1.41405e-10	0.88592	0.289496	0.596425	acute_vs_healthy	Melanocyte
ZNF613.AS3	ZNF613	2.4548e-14	1.11426	1	1	1.66926e-10	0.966379	0.568912	0.397467	acute_vs_healthy	Melanocyte
MPHOSPH9	MPHOSPH9	2.45681e-14	-2.23145	1	1	1.67063e-10	0.240034	0.993276	-0.753242	acute_vs_healthy	Melanocyte
NPHP3.AS3	NPHP3	2.76935e-14	-1.6546	1	1	1.88316e-10	0.238167	0.743636	-0.505469	acute_vs_healthy	Melanocyte
GOLIM4	GOLIM4	3.07907e-14	-2.22877	1	1	2.09377e-10	0.225461	0.981	-0.755539	acute_vs_healthy	Melanocyte
DONSON	DONSON	3.25249e-14	2.23877	1	1	2.21169e-10	0.799878	0.226833	0.573044	acute_vs_healthy	Melanocyte
NEDD4L.AS2	NEDD4L	3.47346e-14	-3.34052	1	1	2.36195e-10	0.0434276	0.818705	-0.775278	acute_vs_healthy	Melanocyte
DBF4B.AS2	DBF4B	8.48204e-14	1.62396	1	1	5.76779e-10	0.998369	0.440472	0.557897	acute_vs_healthy	Melanocyte
STK39	STK39	8.81411e-14	1.87436	1	1	5.9936e-10	0.993619	0.385152	0.608467	acute_vs_healthy	Melanocyte
AMBRA1	AMBRA1	8.84066e-14	2.52721	1	1	6.01165e-10	0.436888	0.0933108	0.343578	acute_vs_healthy	Melanocyte
TP53INP2	TP53INP2	8.84066e-14	5.17274	1	1	6.01165e-10	0.867976	0.0235162	0.84446	acute_vs_healthy	Melanocyte
ENSG00000246090	ENSG00000246090	9.52194e-14	-2.22277	1	1	6.47492e-10	0.250853	0.998199	-0.747346	acute_vs_healthy	Melanocyte
NRIP1	NRIP1	9.56476e-14	4.97678	1	1	6.50404e-10	0.765754	0.0237096	0.742045	acute_vs_healthy	Melanocyte
PBX3.AS2	PBX3	9.67259e-14	2.08535	1	1	6.57736e-10	0.485826	0.148494	0.337333	acute_vs_healthy	Melanocyte
KMT2A.AS3	KMT2A	1.02681e-13	-0.82157	1	1	6.9823e-10	0.616002	0.993615	-0.377614	acute_vs_healthy	Melanocyte
MAFTRR.AS3	MAFTRR	1.13465e-13	-2.7518	1	1	7.71561e-10	0.109301	0.980947	-0.871646	acute_vs_healthy	Melanocyte
ZFP90	ZFP90	1.33568e-13	2.18088	1	1	9.08263e-10	0.86472	0.260644	0.604075	acute_vs_healthy	Melanocyte
C5orf63.AS2	C5orf63	1.51916e-13	2.09608	1	1	1.03303e-09	0.923737	0.300882	0.622855	acute_vs_healthy	Melanocyte
ACTR3B	ACTR3B	2.78074e-13	5.49641	1	1	1.8909e-09	0.884184	0.0173291	0.866855	acute_vs_healthy	Melanocyte
SBF2.AS3	SBF2	2.90858e-13	-3.09383	1	1	1.97784e-09	0.00203387	0.525122	-0.523088	acute_vs_healthy	Melanocyte
CCDC77	CCDC77	3.15902e-13	-3.0053	1	1	2.14813e-09	0.119403	0.982886	-0.863483	acute_vs_healthy	Melanocyte
MFSD4B	MFSD4B	4.99647e-13	-1.40902	1	1	3.3976e-09	0.395312	0.907555	-0.512243	acute_vs_healthy	Melanocyte
ZNF738	ZNF738	6.57935e-13	2.49023	1	1	4.47396e-09	0.572212	0.116361	0.45585	acute_vs_healthy	Melanocyte
RAD54L.AS4	RAD54L	7.59089e-13	5.53986	1	1	5.16181e-09	0.996493	0.0223952	0.974098	acute_vs_healthy	Melanocyte
KLF7.AS2	KLF7	8.38839e-13	-1.74255	1	1	5.70411e-09	0.309328	0.918107	-0.608779	acute_vs_healthy	Melanocyte
TCF7L2	TCF7L2	8.93393e-13	-4.11019	1	1	6.07507e-09	0.00234981	0.899269	-0.896919	acute_vs_healthy	Melanocyte
NPHP3-ACAD11.AS2	NPHP3-ACAD11	9.13209e-13	1.40378	1	1	6.20982e-09	0.577781	0.268135	0.309646	acute_vs_healthy	Melanocyte
SENP5.AS2	SENP5	9.19822e-13	1.125	1	1	6.25479e-09	0.916179	0.553827	0.362352	acute_vs_healthy	Melanocyte
FGGY.AS10	FGGY	1.69086e-12	1.91792	1	1	1.14978e-08	0.843505	0.298033	0.545471	acute_vs_healthy	Melanocyte
TNC.AS2	TNC	1.89057e-12	1.4395	1	1	1.28559e-08	0.929332	0.448796	0.480536	acute_vs_healthy	Melanocyte
ENSG00000291102	ENSG00000291102	2.05745e-12	4.83313	1	1	1.39907e-08	0.312977	0.000123399	0.312854	acute_vs_healthy	Melanocyte
SNRK.AS2	SNRK	2.16272e-12	1.67027	1	1	1.47065e-08	0.962254	0.413935	0.548319	acute_vs_healthy	Melanocyte
GK.AS4	GK	2.22114e-12	2.01824	1	1	1.51037e-08	0.994767	0.350342	0.644425	acute_vs_healthy	Melanocyte
GAB1	GAB1	2.24225e-12	-0.841229	1	1	1.52473e-08	0.550387	0.914773	-0.364386	acute_vs_healthy	Melanocyte
RUBCN.AS2	RUBCN	2.33133e-12	-3.93221	1	1	1.58531e-08	0.00304283	0.832921	-0.829878	acute_vs_healthy	Melanocyte
KANSL1	KANSL1	2.33408e-12	-4.32495	1	1	1.58718e-08	0.00134503	0.981601	-0.980256	acute_vs_healthy	Melanocyte
FANCI.AS3	FANCI	2.50866e-12	-2.96162	1	1	1.70589e-08	0.0119549	0.538226	-0.526271	acute_vs_healthy	Melanocyte
MEAK7	MEAK7	3.93805e-12	4.27973	1	1	2.67787e-08	0.631859	0.0283733	0.603486	acute_vs_healthy	Melanocyte
PAOX	PAOX	4.45814e-12	1.22912	1	1	3.03154e-08	0.788629	0.430814	0.357815	acute_vs_healthy	Melanocyte
FAM221A.AS4	FAM221A	4.91784e-12	-1.45825	1	1	3.34413e-08	0.182222	0.563481	-0.381259	acute_vs_healthy	Melanocyte
ENSG00000290927.AS3	ENSG00000290927	5.47967e-12	-0.952572	1	1	3.72618e-08	0.25282	0.585799	-0.332979	acute_vs_healthy	Melanocyte
IGF2BP2	IGF2BP2	7.61367e-12	3.65916	1	1	5.1773e-08	0.605794	0.0529846	0.55281	acute_vs_healthy	Melanocyte
WDPCP	WDPCP	9.24538e-12	0.987506	1	1	6.28686e-08	0.965605	0.606638	0.358968	acute_vs_healthy	Melanocyte
AADACL2	AADACL2	1.01023e-11	-2.16374	1	1	6.86957e-08	0.169767	0.77699	-0.607223	acute_vs_healthy	Melanocyte
SENP5	SENP5	1.09987e-11	6.20418	1	1	7.47912e-08	0.939523	0.00639025	0.933132	acute_vs_healthy	Melanocyte
ENSG00000291147.AS2	ENSG00000291147	1.15478e-11	1.24102	1	1	7.85253e-08	0.851659	0.457756	0.393903	acute_vs_healthy	Melanocyte
FOCAD.AS2	FOCAD	1.16679e-11	2.08661	1	1	7.93415e-08	0.995308	0.329019	0.666289	acute_vs_healthy	Melanocyte
SLK	SLK	1.75488e-11	1.37607	1	1	1.19332e-07	0.919167	0.478689	0.440478	acute_vs_healthy	Melanocyte
NETO2	NETO2	1.81215e-11	-1.30785	1	1	1.23226e-07	0.394268	0.903573	-0.509305	acute_vs_healthy	Melanocyte
TMPRSS11D	TMPRSS11D	1.89971e-11	3.98319	1	1	1.2918e-07	0.998209	0.0932535	0.904956	acute_vs_healthy	Melanocyte
MARK1.AS4	MARK1	2.06716e-11	-4.01443	1	1	1.40567e-07	0.00481438	0.879155	-0.87434	acute_vs_healthy	Melanocyte
TDP1.AS4	TDP1	2.2141e-11	-1.38833	1	1	1.50559e-07	0.349958	0.828576	-0.478618	acute_vs_healthy	Melanocyte
EPB41L1.AS5	EPB41L1	2.46246e-11	-1.17298	1	1	1.67448e-07	0.224473	0.594722	-0.37025	acute_vs_healthy	Melanocyte
ENSG00000291129	ENSG00000291129	2.62854e-11	-1.02694	1	1	1.78741e-07	0.537899	0.978381	-0.440482	acute_vs_healthy	Melanocyte
SBF2-AS1	SBF2-AS1	4.10619e-11	-1.99593	1	1	2.79221e-07	0.0898825	0.517313	-0.427431	acute_vs_healthy	Melanocyte
ATPSCKMT	ATPSCKMT	4.11381e-11	-1.67662	1	1	2.79739e-07	0.36413	0.97949	-0.61536	acute_vs_healthy	Melanocyte
ADGRE5	ADGRE5	4.32843e-11	6.27024	1	1	2.94334e-07	0.987652	0.00701133	0.980641	acute_vs_healthy	Melanocyte
NSMF	NSMF	5.02977e-11	-0.588437	1	1	3.42024e-07	0.670084	0.98018	-0.310097	acute_vs_healthy	Melanocyte
PARP11	PARP11	6.57638e-11	2.10564	1	1	4.47194e-07	0.551844	0.142468	0.409376	acute_vs_healthy	Melanocyte
MROH1	MROH1	7.54383e-11	3.73908	1	1	5.12981e-07	0.533072	0.0400643	0.493008	acute_vs_healthy	Melanocyte
RIC8B	RIC8B	7.70581e-11	2.74576	1	1	5.23995e-07	0.389414	0.0540877	0.335326	acute_vs_healthy	Melanocyte
ODF2L.AS4	ODF2L	7.74536e-11	-0.620896	1	1	5.26685e-07	0.670484	0.999777	-0.329293	acute_vs_healthy	Melanocyte
CLK4.AS2	CLK4	7.95676e-11	-1.28697	1	1	5.4106e-07	0.156533	0.461177	-0.304644	acute_vs_healthy	Melanocyte
CLHC1.AS2	CLHC1	8.24043e-11	-1.17814	1	1	5.60349e-07	0.486673	0.9669	-0.480227	acute_vs_healthy	Melanocyte
NDUFAF7.AS2	NDUFAF7	8.54795e-11	-1.81021	1	1	5.81261e-07	0.205019	0.724214	-0.519195	acute_vs_healthy	Melanocyte
TMEM260.AS2	TMEM260	1.29678e-10	-1.66608	1	1	8.81813e-07	0.248095	0.81798	-0.569885	acute_vs_healthy	Melanocyte
ZNF383.AS2	ZNF383	1.40225e-10	-1.53858	1	1	9.53532e-07	0.362986	0.948915	-0.58593	acute_vs_healthy	Melanocyte
ZSCAN32	ZSCAN32	1.42483e-10	3.37285	1	1	9.68886e-07	0.615414	0.0643445	0.551069	acute_vs_healthy	Melanocyte
NABP1	NABP1	1.71689e-10	-1.25851	1	1	1.16748e-06	0.455781	0.962332	-0.506551	acute_vs_healthy	Melanocyte
ZCWPW1.AS2	ZCWPW1	1.94492e-10	5.23791	1	1	1.32255e-06	0.516126	0.00526153	0.510865	acute_vs_healthy	Melanocyte
CCDC126	CCDC126	3.19792e-10	1.62994	1	1	2.17459e-06	0.938345	0.40095	0.537395	acute_vs_healthy	Melanocyte
TSGA10.AS2	TSGA10	3.71609e-10	-1.42406	1	1	2.52694e-06	0.0928716	0.469698	-0.376826	acute_vs_healthy	Melanocyte
SYNRG.AS2	SYNRG	4.32555e-10	-0.649808	1	1	2.94137e-06	0.666558	0.978801	-0.312242	acute_vs_healthy	Melanocyte
CNTRL.AS4	CNTRL	4.37072e-10	1.92205	1	1	2.97209e-06	0.989497	0.368025	0.621472	acute_vs_healthy	Melanocyte
TLK2.AS8	TLK2	4.52279e-10	1.18186	1	1	3.0755e-06	0.830042	0.474713	0.355329	acute_vs_healthy	Melanocyte
TMEM263	TMEM263	4.80594e-10	-1.72151	1	1	3.26804e-06	0.33172	0.981439	-0.649719	acute_vs_healthy	Melanocyte
HORMAD1	HORMAD1	4.85581e-10	0.86519	1	1	3.30195e-06	0.937892	0.633024	0.304868	acute_vs_healthy	Melanocyte
ADGRE2	ADGRE2	6.91734e-10	-2.8313	1	1	4.70379e-06	0.12736	0.980844	-0.853484	acute_vs_healthy	Melanocyte
ZSCAN5A	ZSCAN5A	8.32497e-10	3.05461	1	1	5.66098e-06	0.584619	0.0886781	0.49594	acute_vs_healthy	Melanocyte
DENND1B.AS2	DENND1B	8.6643e-10	-2.6262	1	1	5.89172e-06	0.00824857	0.438126	-0.429877	acute_vs_healthy	Melanocyte
NIPAL1	NIPAL1	9.54569e-10	1.03097	1	1	6.49107e-06	0.979503	0.606398	0.373105	acute_vs_healthy	Melanocyte
C12orf56	C12orf56	1.02595e-09	6.81504	1	1	6.97646e-06	0.999847	0.000123623	0.999723	acute_vs_healthy	Melanocyte
MDFI	MDFI	1.04924e-09	2.58573	1	1	7.13484e-06	0.989289	0.246401	0.742888	acute_vs_healthy	Melanocyte
MAP2	MAP2	1.09317e-09	2.15254	1	1	7.43355e-06	0.920011	0.286149	0.633862	acute_vs_healthy	Melanocyte
NRG1.AS2	NRG1	1.11265e-09	4.06119	1	1	7.56605e-06	0.680401	0.0460999	0.634301	acute_vs_healthy	Melanocyte
DHX30	DHX30	1.1375e-09	1.70224	1	1	7.735e-06	0.98756	0.403392	0.584168	acute_vs_healthy	Melanocyte
ADAL.AS2	ADAL	1.15633e-09	1.64687	1	1	7.86304e-06	0.795029	0.341581	0.453449	acute_vs_healthy	Melanocyte
TUBD1.AS6	TUBD1	1.27317e-09	1.52237	1	1	8.65753e-06	0.872762	0.410585	0.462177	acute_vs_healthy	Melanocyte
RBM6.AS2	RBM6	1.4388e-09	-0.790497	1	1	9.78383e-06	0.492057	0.831601	-0.339544	acute_vs_healthy	Melanocyte
HIVEP1	HIVEP1	1.45381e-09	-0.818181	1	1	9.88594e-06	0.611907	0.98928	-0.377373	acute_vs_healthy	Melanocyte
TIRAP	TIRAP	1.46404e-09	-1.8606	1	1	9.95547e-06	0.142431	0.700269	-0.557839	acute_vs_healthy	Melanocyte
HOTAIR	HOTAIR	1.7976e-09	-1.11856	1	1	1.22237e-05	0.15858	0.492862	-0.334282	acute_vs_healthy	Melanocyte
PPP1R3E	PPP1R3E	1.86577e-09	1.04642	1	1	1.26873e-05	0.903353	0.548254	0.355099	acute_vs_healthy	Melanocyte
ZNF227	ZNF227	1.93603e-09	0.870322	1	1	1.3165e-05	0.993545	0.667024	0.32652	acute_vs_healthy	Melanocyte
STRN3.AS2	STRN3	2.04832e-09	3.21272	1	1	1.39286e-05	0.602323	0.0698301	0.532493	acute_vs_healthy	Melanocyte
UQCC6.AS2	UQCC6	2.08852e-09	-2.13969	1	1	1.4202e-05	0.181589	0.814212	-0.632623	acute_vs_healthy	Melanocyte
ETFDH	ETFDH	2.09654e-09	1.49735	1	1	1.42565e-05	0.995423	0.455949	0.539473	acute_vs_healthy	Melanocyte
MIRLET7BHG	MIRLET7BHG	2.57304e-09	4.7554	1	1	1.74967e-05	0.921506	0.0423237	0.879182	acute_vs_healthy	Melanocyte
CACTIN	CACTIN	2.70926e-09	2.01511	1	1	1.84229e-05	0.72529	0.212774	0.512516	acute_vs_healthy	Melanocyte
DNAJB6.AS2	DNAJB6	2.76345e-09	5.8882	1	1	1.87915e-05	0.999735	0.0144266	0.985309	acute_vs_healthy	Melanocyte
PVT1.AS3	PVT1	2.88522e-09	4.5913	1	1	1.96195e-05	0.337204	0.00558802	0.331616	acute_vs_healthy	Melanocyte
PRELID3A.AS2	PRELID3A	2.93717e-09	-2.44472	1	1	1.99728e-05	0.161239	0.970722	-0.809483	acute_vs_healthy	Melanocyte
LRRC27.AS2	LRRC27	3.11173e-09	3.52359	1	1	2.11598e-05	0.964524	0.114191	0.850333	acute_vs_healthy	Melanocyte
PLOD2.AS4	PLOD2	3.68137e-09	0.926755	1	1	2.50333e-05	0.936463	0.603006	0.333457	acute_vs_healthy	Melanocyte
TBC1D31.AS2	TBC1D31	3.69181e-09	1.21725	1	1	2.51043e-05	0.984235	0.553624	0.430611	acute_vs_healthy	Melanocyte
MORN4	MORN4	3.7138e-09	4.11617	1	1	2.52538e-05	0.996473	0.058629	0.937844	acute_vs_healthy	Melanocyte
ZNF91.AS2	ZNF91	4.33056e-09	2.29848	1	1	2.94478e-05	0.998717	0.287652	0.711065	acute_vs_healthy	Melanocyte
LRCH3.AS3	LRCH3	4.67543e-09	-0.768684	1	1	3.17929e-05	0.618887	0.974266	-0.355378	acute_vs_healthy	Melanocyte
PTPN18	PTPN18	5.48035e-09	1.42657	1	1	3.72664e-05	0.715217	0.34126	0.373957	acute_vs_healthy	Melanocyte
LPIN1.AS2	LPIN1	5.57125e-09	-2.82203	1	1	3.78845e-05	0.000539672	0.422614	-0.422074	acute_vs_healthy	Melanocyte
ZNF33B	ZNF33B	5.90414e-09	2.09753	1	1	4.01481e-05	0.778671	0.229552	0.549119	acute_vs_healthy	Melanocyte
OPA1.AS6	OPA1	6.69134e-09	1.70594	1	1	4.55011e-05	0.725987	0.294044	0.431944	acute_vs_healthy	Melanocyte
SCAI.AS2	SCAI	7.51243e-09	-2.37879	1	1	5.10845e-05	0.163291	0.951659	-0.788367	acute_vs_healthy	Melanocyte
UPF3B	UPF3B	7.53813e-09	2.69561	1	1	5.12593e-05	0.630272	0.118926	0.511346	acute_vs_healthy	Melanocyte
POGZ	POGZ	8.98534e-09	-0.743284	1	1	6.11003e-05	0.623027	0.972684	-0.349657	acute_vs_healthy	Melanocyte
AUTS2.AS2	AUTS2	9.17989e-09	4.02485	1	1	6.24233e-05	0.703884	0.0419584	0.661926	acute_vs_healthy	Melanocyte
ASAP2	ASAP2	9.5719e-09	-2.58438	1	1	6.50889e-05	0.101762	0.836495	-0.734733	acute_vs_healthy	Melanocyte
C8orf44	C8orf44	1.0725e-08	-1.98726	1	1	7.29301e-05	0.0280269	0.349067	-0.32104	acute_vs_healthy	Melanocyte
ALDH3B1	ALDH3B1	1.08653e-08	-2.90387	1	1	7.38838e-05	0.070624	0.889751	-0.819127	acute_vs_healthy	Melanocyte
DUSP16.AS2	DUSP16	1.18116e-08	0.840782	1	1	8.03185e-05	0.987952	0.671592	0.31636	acute_vs_healthy	Melanocyte
AHI1.AS10	AHI1	1.2875e-08	2.72568	1	1	8.75498e-05	0.906214	0.190749	0.715465	acute_vs_healthy	Melanocyte
TMEM39B.AS2	TMEM39B	1.29314e-08	1.50746	1	1	8.79335e-05	0.645978	0.282903	0.363075	acute_vs_healthy	Melanocyte
ST7L.AS3	ST7L	1.32492e-08	3.02392	1	1	9.00948e-05	0.525986	0.0648044	0.461182	acute_vs_healthy	Melanocyte
UBE3A	UBE3A	1.45419e-08	1.20011	1	1	9.88849e-05	0.976075	0.533522	0.442553	acute_vs_healthy	Melanocyte
GPCPD1	GPCPD1	1.51396e-08	1.38691	1	1	0.000102949	0.821541	0.403552	0.417989	acute_vs_healthy	Melanocyte
FANCA.AS4	FANCA	1.52662e-08	5.07364	1	1	0.00010381	0.603955	0.0111662	0.592789	acute_vs_healthy	Melanocyte
F3	F3	1.56956e-08	2.44455	1	1	0.00010673	0.670659	0.159573	0.511086	acute_vs_healthy	Melanocyte
AGPAT3	AGPAT3	1.60365e-08	-1.55457	1	1	0.000109048	0.172024	0.62381	-0.451787	acute_vs_healthy	Melanocyte
TAF8.AS2	TAF8	1.71601e-08	-0.992265	1	1	0.000116689	0.468429	0.867715	-0.399287	acute_vs_healthy	Melanocyte
KTN1.AS4	KTN1	1.76018e-08	2.09671	1	1	0.000119692	0.456327	0.125045	0.331282	acute_vs_healthy	Melanocyte
ZMYM4	ZMYM4	1.95498e-08	4.63883	1	1	0.000132938	0.891795	0.0350229	0.856772	acute_vs_healthy	Melanocyte
TVP23C-CDRT4	TVP23C-CDRT4	2.15236e-08	3.3666	1	1	0.000146361	0.580017	0.0570197	0.522997	acute_vs_healthy	Melanocyte
CARD14	CARD14	2.47891e-08	2.33453	1	1	0.000168566	0.601003	0.145398	0.455605	acute_vs_healthy	Melanocyte
ANKRD26.AS5	ANKRD26	2.8412e-08	-1.36065	1	1	0.000193202	0.402292	0.896947	-0.494655	acute_vs_healthy	Melanocyte
PLEKHG3	PLEKHG3	2.8823e-08	-1.38166	1	1	0.000195996	0.326005	0.829613	-0.503608	acute_vs_healthy	Melanocyte
ENSG00000290927	ENSG00000290927	3.54131e-08	4.3029	1	1	0.000240809	0.893928	0.0629813	0.830947	acute_vs_healthy	Melanocyte
BCORL1.AS2	BCORL1	3.72401e-08	2.02774	1	1	0.000253232	0.862756	0.287437	0.575319	acute_vs_healthy	Melanocyte
TCOF1.AS2	TCOF1	3.84634e-08	3.82234	1	1	0.000261551	0.745374	0.0614057	0.683969	acute_vs_healthy	Melanocyte
MIA2	MIA2	4.08058e-08	-1.40391	1	1	0.000277479	0.279093	0.75821	-0.479117	acute_vs_healthy	Melanocyte
TMEM260	TMEM260	4.71486e-08	2.53257	1	1	0.000320611	0.835411	0.194774	0.640637	acute_vs_healthy	Melanocyte
GCH1.AS2	GCH1	4.76733e-08	2.26865	1	1	0.000324179	0.707694	0.195385	0.512309	acute_vs_healthy	Melanocyte
MTRF1.AS2	MTRF1	5.06797e-08	1.39557	1	1	0.000344622	0.639288	0.300524	0.338764	acute_vs_healthy	Melanocyte
SHLD2	SHLD2	5.09999e-08	2.78722	1	1	0.0003468	0.422354	0.0686134	0.35374	acute_vs_healthy	Melanocyte
POFUT1.AS2	POFUT1	6.37039e-08	1.80713	1	1	0.000433186	0.953138	0.362907	0.590231	acute_vs_healthy	Melanocyte
PPIP5K2	PPIP5K2	6.68251e-08	1.94357	1	1	0.00045441	0.67274	0.231214	0.441527	acute_vs_healthy	Melanocyte
DMPK	DMPK	9.02279e-08	2.70177	1	1	0.00061355	0.686552	0.127809	0.558743	acute_vs_healthy	Melanocyte
PTPN3	PTPN3	1.12202e-07	-1.49089	1	1	0.00076297	0.190231	0.586918	-0.396687	acute_vs_healthy	Melanocyte
TMEM116	TMEM116	1.48899e-07	2.45634	1	1	0.00101252	0.798699	0.180252	0.618446	acute_vs_healthy	Melanocyte
ATF2.AS6	ATF2	1.54705e-07	-0.782911	1	1	0.00105199	0.526808	0.876204	-0.349396	acute_vs_healthy	Melanocyte
FER.AS2	FER	1.58133e-07	-0.650673	1	1	0.0010753	0.618533	0.926797	-0.308264	acute_vs_healthy	Melanocyte
PLSCR1	PLSCR1	3.10288e-07	1.25003	1	1	0.00210996	0.928883	0.481635	0.447248	acute_vs_healthy	Melanocyte
BBOF1.AS3	BBOF1	3.27866e-07	3.30253	1	1	0.00222949	0.900395	0.136822	0.763573	acute_vs_healthy	Melanocyte
C6orf136	C6orf136	3.61822e-07	-1.08632	1	1	0.00246039	0.296975	0.667196	-0.370222	acute_vs_healthy	Melanocyte
THUMPD2	THUMPD2	8.58036e-07	-0.805741	1	1	0.00583464	0.479471	0.779868	-0.300397	acute_vs_healthy	Melanocyte
LINC00511	LINC00511	9.16367e-07	0.84734	1	1	0.0062313	0.996324	0.629398	0.366926	acute_vs_healthy	Melanocyte
ARMCX4	ARMCX4	9.81833e-07	-1.59875	1	1	0.00667646	0.12057	0.488286	-0.367715	acute_vs_healthy	Melanocyte
POLR2D	POLR2D	9.86776e-07	1.12473	1	1	0.00671008	0.932797	0.525391	0.407406	acute_vs_healthy	Melanocyte
ZNF655	ZNF655	1.11139e-06	1.11339	1	1	0.00755742	0.833525	0.477728	0.355797	acute_vs_healthy	Melanocyte
NUTM2A-AS1.AS3	NUTM2A-AS1	1.14532e-06	2.55009	1	1	0.00778815	0.709545	0.161192	0.548354	acute_vs_healthy	Melanocyte
CEP95	CEP95	1.1559e-06	2.35368	1	1	0.00786013	0.403783	0.0872479	0.316535	acute_vs_healthy	Melanocyte
ETNK1.AS2	ETNK1	1.19717e-06	-1.55912	1	1	0.00814075	0.100191	0.500155	-0.399965	acute_vs_healthy	Melanocyte
ZFYVE16	ZFYVE16	1.27343e-06	-2.0291	1	1	0.00865932	0.184191	0.909945	-0.725754	acute_vs_healthy	Melanocyte
CSPP1.AS5	CSPP1	1.33197e-06	3.04934	1	1	0.00905741	0.635968	0.0858648	0.550103	acute_vs_healthy	Melanocyte
EGLN1	EGLN1	1.5137e-06	2.03454	1	1	0.0102932	0.438305	0.104071	0.334235	acute_vs_healthy	Melanocyte
AGL	AGL	2.25682e-06	2.16741	1	1	0.0153464	0.512888	0.137846	0.375042	acute_vs_healthy	Melanocyte
SIN3B	SIN3B	2.46106e-06	1.20356	1	1	0.0167352	0.785351	0.439725	0.345626	acute_vs_healthy	Melanocyte
MOSPD1	MOSPD1	3.24791e-06	3.50168	1	1	0.0220858	0.578961	0.0464586	0.532502	acute_vs_healthy	Melanocyte
PPP2R3C.AS3	PPP2R3C	3.98766e-06	1.34627	1	1	0.0271161	0.867526	0.430557	0.436969	acute_vs_healthy	Melanocyte
TP53I3	TP53I3	4.04814e-06	3.54687	1	1	0.0275274	0.514903	0.0498061	0.465097	acute_vs_healthy	Melanocyte
MACF1.AS2	MACF1	4.58023e-06	2.23456	1	1	0.0311455	0.486297	0.112492	0.373805	acute_vs_healthy	Melanocyte
ARHGAP12	ARHGAP12	4.7887e-06	-1.8345	1	1	0.0325631	0.2246	0.897362	-0.672762	acute_vs_healthy	Melanocyte
FOXN2	FOXN2	4.79675e-06	-1.14557	1	1	0.0326179	0.248413	0.622585	-0.374172	acute_vs_healthy	Melanocyte
BBIP1.AS2	BBIP1	4.92634e-06	2.2574	1	1	0.0334991	0.619387	0.133041	0.486346	acute_vs_healthy	Melanocyte
LTBP4.AS2	LTBP4	5.93875e-06	1.60951	1	1	0.0403835	0.736304	0.270121	0.466183	acute_vs_healthy	Melanocyte
CYP20A1.AS2	CYP20A1	6.10558e-06	1.20181	1	1	0.0415179	0.877964	0.459647	0.418317	acute_vs_healthy	Melanocyte
CHORDC1	CHORDC1	7.64269e-06	-2.2683	1	1	0.0519703	0.0987862	0.745655	-0.646869	acute_vs_healthy	Melanocyte
UPP1	UPP1	8.40659e-06	2.34141	1	1	0.0571648	0.657511	0.154423	0.503088	acute_vs_healthy	Melanocyte
N4BP1	N4BP1	9.25255e-06	3.25389	1	1	0.0629173	0.720198	0.0998109	0.620388	acute_vs_healthy	Melanocyte
ENSG00000291100.AS2	ENSG00000291100	1.03614e-05	2.91497	1	1	0.0704577	0.826324	0.124189	0.702135	acute_vs_healthy	Melanocyte
MLLT3	MLLT3	1.33192e-05	0.906595	1	1	0.0905707	0.881587	0.572243	0.309344	acute_vs_healthy	Melanocyte
ENSG00000291152.AS2	ENSG00000291152	1.43293e-05	-0.734534	1	1	0.0974394	0.565597	0.896527	-0.33093	acute_vs_healthy	Melanocyte
CHD1.AS2	CHD1	1.5887e-05	-0.898579	1	1	0.108032	0.299578	0.645877	-0.346299	acute_vs_healthy	Melanocyte
ABI2.AS2	ABI2	1.97378e-05	-0.863269	1	1	0.134217	0.332552	0.647201	-0.314649	acute_vs_healthy	Melanocyte
LINC01550	LINC01550	2.11596e-05	1.8207	1	1	0.143885	0.726359	0.247529	0.47883	acute_vs_healthy	Melanocyte
SLC9B2.AS3	SLC9B2	2.90835e-05	-1.55739	1	1	0.197768	0.275212	0.8543	-0.579088	acute_vs_healthy	Melanocyte
THEM4	THEM4	3.97457e-05	-1.01272	1	1	0.270271	0.211737	0.582509	-0.370771	acute_vs_healthy	Melanocyte
ADPGK.AS3	ADPGK	4.12651e-05	1.18745	1	1	0.280603	0.780911	0.399947	0.380964	acute_vs_healthy	Melanocyte
CYP20A1	CYP20A1	4.42483e-05	1.47722	1	1	0.300889	0.79052	0.351764	0.438756	acute_vs_healthy	Melanocyte
C6orf52	C6orf52	4.47589e-05	-1.48043	1	1	0.30436	0.16633	0.684242	-0.517913	acute_vs_healthy	Melanocyte
PPIP5K2.AS2	PPIP5K2	5.59119e-05	-0.876796	1	1	0.380201	0.24551	0.573737	-0.328227	acute_vs_healthy	Melanocyte
RAD1	RAD1	6.44179e-05	1.56826	1	1	0.438042	0.686069	0.300639	0.38543	acute_vs_healthy	Melanocyte
NME6	NME6	7.65449e-05	-0.94481	1	1	0.520505	0.408971	0.779946	-0.370975	acute_vs_healthy	Melanocyte
KCTD20.AS3	KCTD20	0.000198393	0.956766	1	1	1	0.776212	0.474911	0.301302	acute_vs_healthy	Melanocyte
OGFOD3	OGFOD3	0.000311586	2.11853	1	1	1	0.532783	0.146646	0.386137	acute_vs_healthy	Melanocyte
LRRC8A	LRRC8A	0.000320918	1.73111	1	1	1	0.659298	0.260151	0.399147	acute_vs_healthy	Melanocyte
CREBBP	CREBBP	0.000349404	-0.672291	1	1	1	0.498498	0.810959	-0.312461	acute_vs_healthy	Melanocyte
NLRP1	NLRP1	0.000479971	2.51287	1	1	1	0.460951	0.0753521	0.385599	acute_vs_healthy	Melanocyte
DUBR.AS4	DUBR	0.000621523	-0.694169	1	1	1	0.541457	0.845619	-0.304162	acute_vs_healthy	Melanocyte
GLI4	GLI4	0.00071801	1.52598	1	1	1	0.608118	0.267666	0.340451	acute_vs_healthy	Melanocyte
MAP2.AS2	MAP2	0.000748075	1.67259	1	1	1	0.526206	0.187158	0.339049	acute_vs_healthy	Melanocyte
TLN1	TLN1	0.000765129	1.93538	1	1	1	0.692491	0.247534	0.444958	acute_vs_healthy	Melanocyte
PML	PML	0.000815158	0.939631	1	1	1	0.795661	0.462732	0.33293	acute_vs_healthy	Melanocyte
BEST1	BEST1	0.000829425	1.42238	1	1	1	0.610617	0.251255	0.359362	acute_vs_healthy	Melanocyte
TBRG1.AS2	TBRG1	0.000968743	1.08736	1	1	1	0.659503	0.354031	0.305472	acute_vs_healthy	Melanocyte
RHOC	RHOC	0.000972086	0.961253	1	1	1	0.752216	0.445041	0.307176	acute_vs_healthy	Melanocyte
ENDOV.AS4	ENDOV	0.00210838	1.70428	1	1	1	0.639024	0.257177	0.381847	acute_vs_healthy	Melanocyte
KDM1A	KDM1A	0.00217427	-0.884868	1	1	1	0.480754	0.881808	-0.401054	acute_vs_healthy	Melanocyte
ATAT1	ATAT1	0.00253362	1.96405	1	1	1	0.729618	0.225834	0.503784	acute_vs_healthy	Melanocyte
MYO5A.AS7	MYO5A	0.00325649	-0.977508	1	1	1	0.425892	0.905904	-0.480012	acute_vs_healthy	Melanocyte
PABIR2	PABIR2	0.00593741	1.26222	1	1	1	0.629189	0.293134	0.336055	acute_vs_healthy	Melanocyte
LRP8	LRP8	1.13773e-97	-0.894028	1	1	7.73654e-94	0.652231	0.999657	-0.347426	acute_vs_healthy	Spinous-cell
SLC28A3	SLC28A3	1.4707e-97	8.43415	1	1	1.00008e-93	0.99977	0.00012364	0.999647	acute_vs_healthy	Spinous-cell
SPECC1.AS2	SPECC1	1.71183e-97	1.95461	1	1	1.16405e-93	0.999656	0.363077	0.636579	acute_vs_healthy	Spinous-cell
SH3TC1.AS4	SH3TC1	1.97476e-97	6.53246	1	1	1.34284e-93	0.999213	0.0136363	0.985576	acute_vs_healthy	Spinous-cell
XPR1	XPR1	3.40245e-97	1.00274	1	1	2.31367e-93	0.999518	0.616446	0.383072	acute_vs_healthy	Spinous-cell
CNGB1	CNGB1	1.02804e-96	8.43431	1	1	6.99069e-93	0.999815	0.000123457	0.999691	acute_vs_healthy	Spinous-cell
DBF4B.AS2	DBF4B	1.21651e-96	1.72974	1	1	8.27227e-93	0.998305	0.41372	0.584585	acute_vs_healthy	Spinous-cell
TM4SF19-DYNLT2B	TM4SF19-DYNLT2B	1.86713e-96	6.44383	1	1	1.26965e-92	0.709395	0.00703987	0.702355	acute_vs_healthy	Spinous-cell
GLIPR1.AS2	GLIPR1	2.4833e-96	1.44919	1	1	1.68865e-92	0.999096	0.484891	0.514204	acute_vs_healthy	Spinous-cell
TREM1	TREM1	2.81974e-96	-1.50514	1	1	1.91742e-92	0.469024	0.999578	-0.530554	acute_vs_healthy	Spinous-cell
PAPLN	PAPLN	3.67999e-96	0.806652	1	1	2.5024e-92	0.99893	0.680595	0.318335	acute_vs_healthy	Spinous-cell
SENP5.AS2	SENP5	3.67999e-96	1.18471	1	1	2.5024e-92	0.993501	0.556181	0.43732	acute_vs_healthy	Spinous-cell
ENSG00000235978.AS2	ENSG00000235978	4.15092e-96	8.38108	1	1	2.82262e-92	0.975009	0.000123645	0.974885	acute_vs_healthy	Spinous-cell
CEMIP2	CEMIP2	5.07211e-96	-1.60477	1	1	3.44904e-92	0.315174	0.757007	-0.441832	acute_vs_healthy	Spinous-cell
TP53INP2	TP53INP2	5.16286e-96	5.8713	1	1	3.51075e-92	0.868239	0.0186655	0.849574	acute_vs_healthy	Spinous-cell
ADGRE5	ADGRE5	6.32715e-96	6.65727	1	1	4.30246e-92	0.981331	0.0104898	0.970841	acute_vs_healthy	Spinous-cell
PTPN20.AS5	PTPN20	1.06441e-95	2.56541	1	1	7.23802e-92	0.942085	0.228436	0.713649	acute_vs_healthy	Spinous-cell
NEMP1.AS2	NEMP1	1.16058e-95	2.07908	1	1	7.89195e-92	0.886841	0.287309	0.599532	acute_vs_healthy	Spinous-cell
PHKA1.AS2	PHKA1	3.32473e-95	8.4343	1	1	2.26082e-91	0.999813	0.000123445	0.99969	acute_vs_healthy	Spinous-cell
CCDC18	CCDC18	3.4463e-95	-1.3912	1	1	2.34348e-91	0.487241	0.976884	-0.489643	acute_vs_healthy	Spinous-cell
ATR	ATR	4.42392e-95	-0.807999	1	1	3.00827e-91	0.678513	0.993782	-0.315269	acute_vs_healthy	Spinous-cell
TMPRSS11D	TMPRSS11D	6.06183e-95	4.06366	1	1	4.12205e-91	0.99821	0.0933636	0.904846	acute_vs_healthy	Spinous-cell
PLOD2.AS4	PLOD2	6.837e-95	0.932899	1	1	4.64916e-91	0.926594	0.58434	0.342253	acute_vs_healthy	Spinous-cell
SBF2.AS4	SBF2	9.45228e-95	-1.51099	1	1	6.42755e-91	0.465259	0.998507	-0.533248	acute_vs_healthy	Spinous-cell
CDKN2A	CDKN2A	1.2505e-94	7.55189	1	1	8.50339e-91	0.655905	0.000123463	0.655782	acute_vs_healthy	Spinous-cell
ALKBH8	ALKBH8	1.34963e-94	0.833772	1	1	9.17749e-91	0.999814	0.67092	0.328893	acute_vs_healthy	Spinous-cell
ENSG00000291102	ENSG00000291102	1.74551e-94	6.43347	1	1	1.18695e-90	0.349906	0.000123399	0.349782	acute_vs_healthy	Spinous-cell
TBC1D31.AS4	TBC1D31	2.49955e-94	2.48815	1	1	1.69969e-90	0.993961	0.262197	0.731764	acute_vs_healthy	Spinous-cell
CYP4F11	CYP4F11	3.14696e-94	1.85079	1	1	2.13993e-90	0.998083	0.386103	0.61198	acute_vs_healthy	Spinous-cell
TBC1D31	TBC1D31	4.44307e-94	0.994266	1	1	3.02129e-90	0.985311	0.609675	0.375636	acute_vs_healthy	Spinous-cell
ENSG00000291147.AS2	ENSG00000291147	4.58374e-94	1.13914	1	1	3.11694e-90	0.832825	0.461203	0.371622	acute_vs_healthy	Spinous-cell
RAD54L.AS4	RAD54L	1.12457e-93	5.96221	1	1	7.64707e-90	0.996493	0.0223684	0.974124	acute_vs_healthy	Spinous-cell
YAP1	YAP1	2.95453e-93	7.18333	1	1	2.00908e-89	0.99881	0.00694989	0.99186	acute_vs_healthy	Spinous-cell
PTGER3	PTGER3	8.02268e-93	-1.61137	1	1	5.45542e-89	0.429628	0.988897	-0.55927	acute_vs_healthy	Spinous-cell
TMEM164	TMEM164	1.43648e-92	-3.8432	1	1	9.7681e-89	0.100986	0.999714	-0.898728	acute_vs_healthy	Spinous-cell
ADAP2.AS3	ADAP2	2.69522e-92	0.922751	1	1	1.83275e-88	0.992051	0.637949	0.354103	acute_vs_healthy	Spinous-cell
GOLIM4	GOLIM4	3.95788e-92	-2.8257	1	1	2.69136e-88	0.204527	0.996238	-0.791711	acute_vs_healthy	Spinous-cell
GK.AS4	GK	9.40136e-92	2.04711	1	1	6.39293e-88	0.994811	0.341866	0.652945	acute_vs_healthy	Spinous-cell
AVL9	AVL9	1.24336e-91	1.07934	1	1	8.45483e-88	0.998572	0.589294	0.409278	acute_vs_healthy	Spinous-cell
BEST1	BEST1	1.66844e-91	2.6045	1	1	1.13454e-87	0.676597	0.143963	0.532634	acute_vs_healthy	Spinous-cell
STK39	STK39	2.40657e-91	1.78528	1	1	1.63647e-87	0.989895	0.395481	0.594414	acute_vs_healthy	Spinous-cell
C12orf56	C12orf56	6.07645e-91	8.43433	1	1	4.13198e-87	0.999847	0.000123622	0.999723	acute_vs_healthy	Spinous-cell
NRG1.AS2	NRG1	6.77998e-91	4.44112	1	1	4.61038e-87	0.682836	0.0397101	0.643126	acute_vs_healthy	Spinous-cell
ACTR3B	ACTR3B	1.24164e-90	5.95658	1	1	8.44312e-87	0.872658	0.0175423	0.855116	acute_vs_healthy	Spinous-cell
TMEM263	TMEM263	1.40167e-90	-2.11296	1	1	9.53137e-87	0.321373	0.992817	-0.671444	acute_vs_healthy	Spinous-cell
NETO2	NETO2	2.27722e-90	-1.63277	1	1	1.54851e-86	0.381008	0.902064	-0.521056	acute_vs_healthy	Spinous-cell
CLHC1.AS2	CLHC1	5.58075e-90	-1.56781	1	1	3.79491e-86	0.439041	0.976279	-0.537238	acute_vs_healthy	Spinous-cell
ODF2L.AS4	ODF2L	7.79216e-90	-0.787347	1	1	5.29867e-86	0.67898	0.999754	-0.320775	acute_vs_healthy	Spinous-cell
ERG.AS3	ERG	1.95972e-89	-1.64199	1	1	1.33261e-85	0.435829	0.999856	-0.564027	acute_vs_healthy	Spinous-cell
FOCAD.AS2	FOCAD	2.02228e-89	2.08837	1	1	1.37515e-85	0.985834	0.328499	0.657335	acute_vs_healthy	Spinous-cell
SKA3	SKA3	2.0299e-89	1.03458	1	1	1.38033e-85	0.975184	0.591198	0.383985	acute_vs_healthy	Spinous-cell
IGF2BP2	IGF2BP2	5.47272e-89	4.07716	1	1	3.72145e-85	0.695726	0.0499558	0.64577	acute_vs_healthy	Spinous-cell
RASGEF1B.AS2	RASGEF1B	6.27767e-89	-1.10732	1	1	4.26882e-85	0.563337	0.975666	-0.412329	acute_vs_healthy	Spinous-cell
C5orf63.AS2	C5orf63	6.65352e-89	2.23613	1	1	4.5244e-85	0.943081	0.284589	0.658492	acute_vs_healthy	Spinous-cell
TLK2.AS8	TLK2	8.10605e-89	1.32255	1	1	5.51211e-85	0.903261	0.458945	0.444316	acute_vs_healthy	Spinous-cell
SLK	SLK	1.7974e-88	1.44476	1	1	1.22223e-84	0.987602	0.476876	0.510726	acute_vs_healthy	Spinous-cell
KITLG	KITLG	3.45417e-88	1.1593	1	1	2.34884e-84	0.873617	0.485942	0.387674	acute_vs_healthy	Spinous-cell
PTPN18	PTPN18	3.77224e-88	1.39529	1	1	2.56513e-84	0.771282	0.363076	0.408206	acute_vs_healthy	Spinous-cell
MACF1.AS8	MACF1	5.11539e-88	1.93036	1	1	3.47846e-84	0.970832	0.355089	0.615743	acute_vs_healthy	Spinous-cell
KMT2A.AS2	KMT2A	2.38876e-87	1.84469	1	1	1.62436e-83	0.97115	0.37227	0.59888	acute_vs_healthy	Spinous-cell
ZNF738	ZNF738	2.6492e-87	2.46411	1	1	1.80146e-83	0.502043	0.101858	0.400185	acute_vs_healthy	Spinous-cell
CHEK2	CHEK2	3.27705e-87	1.23159	1	1	2.2284e-83	0.987384	0.537281	0.450103	acute_vs_healthy	Spinous-cell
FANCI.AS3	FANCI	3.38795e-87	-4.644	1	1	2.30381e-83	0.0197226	0.540602	-0.52088	acute_vs_healthy	Spinous-cell
HIVEP1	HIVEP1	4.80212e-87	-1.02956	1	1	3.26544e-83	0.5937	0.981217	-0.387517	acute_vs_healthy	Spinous-cell
MAP2	MAP2	1.97824e-86	2.11799	1	1	1.34521e-82	0.929047	0.296922	0.632125	acute_vs_healthy	Spinous-cell
ENSG00000291129	ENSG00000291129	2.19105e-86	-1.20311	1	1	1.48991e-82	0.540281	0.981089	-0.440809	acute_vs_healthy	Spinous-cell
MLKL	MLKL	2.54984e-86	-3.22613	1	1	1.73389e-82	0.0421423	0.429629	-0.387487	acute_vs_healthy	Spinous-cell
TBC1D31.AS2	TBC1D31	4.26936e-86	1.15893	1	1	2.90316e-82	0.981194	0.555938	0.425257	acute_vs_healthy	Spinous-cell
PLEKHG3	PLEKHG3	5.11087e-86	-1.95641	1	1	3.47539e-82	0.287097	0.845692	-0.558595	acute_vs_healthy	Spinous-cell
MORN4	MORN4	6.3775e-86	5.91588	1	1	4.3367e-82	0.992018	0.0199956	0.972022	acute_vs_healthy	Spinous-cell
MPHOSPH9	MPHOSPH9	8.1322e-86	-2.1321	1	1	5.5299e-82	0.321481	0.99707	-0.675589	acute_vs_healthy	Spinous-cell
ASAP2	ASAP2	1.44506e-85	-4.43148	1	1	9.8264e-82	0.0481673	0.814192	-0.766025	acute_vs_healthy	Spinous-cell
TIRAP	TIRAP	1.88224e-85	-3.4998	1	1	1.27992e-81	0.0776951	0.701775	-0.624079	acute_vs_healthy	Spinous-cell
ADGRE2	ADGRE2	2.04593e-85	-4.15642	1	1	1.39123e-81	0.0878406	0.99573	-0.90789	acute_vs_healthy	Spinous-cell
PPP1R3B-DT.AS3	PPP1R3B-DT	2.2799e-85	5.57151	1	1	1.55033e-81	0.924876	0.0215538	0.903323	acute_vs_healthy	Spinous-cell
KANSL1	KANSL1	1.09563e-84	-6.64435	1	1	7.45029e-81	0.00859045	0.985449	-0.976858	acute_vs_healthy	Spinous-cell
SCAI.AS2	SCAI	1.17553e-84	-3.96298	1	1	7.9936e-81	0.0894319	0.935152	-0.84572	acute_vs_healthy	Spinous-cell
MAP2.AS2	MAP2	1.25741e-84	2.45505	1	1	8.55037e-81	0.629235	0.1459	0.483335	acute_vs_healthy	Spinous-cell
SNRK.AS2	SNRK	1.27711e-84	1.60463	1	1	8.68433e-81	0.955364	0.416972	0.538392	acute_vs_healthy	Spinous-cell
ZNF92	ZNF92	1.49391e-84	0.880467	1	1	1.01586e-80	0.967238	0.631666	0.335572	acute_vs_healthy	Spinous-cell
SVIL	SVIL	2.474e-84	-5.03997	1	1	1.68232e-80	0.0178196	0.659237	-0.641417	acute_vs_healthy	Spinous-cell
HCK.AS2	HCK	4.59631e-84	-2.31221	1	1	3.12549e-80	0.098923	0.426538	-0.327615	acute_vs_healthy	Spinous-cell
FANCA.AS4	FANCA	5.39432e-84	5.71382	1	1	3.66814e-80	0.601928	0.0110653	0.590862	acute_vs_healthy	Spinous-cell
CLEC7A	CLEC7A	6.49334e-84	-3.77529	1	1	4.41547e-80	0.102279	0.99984	-0.89756	acute_vs_healthy	Spinous-cell
DNAJB6.AS2	DNAJB6	8.15356e-84	5.6656	1	1	5.54442e-80	0.999735	0.0236112	0.976124	acute_vs_healthy	Spinous-cell
LRRC27.AS2	LRRC27	9.87585e-84	3.81808	1	1	6.71558e-80	0.974506	0.102304	0.872202	acute_vs_healthy	Spinous-cell
MAT1A	MAT1A	1.16198e-83	-1.40851	1	1	7.90143e-80	0.49002	0.995071	-0.505052	acute_vs_healthy	Spinous-cell
ENSG00000290927	ENSG00000290927	2.01284e-83	4.1298	1	1	1.36873e-79	0.962087	0.0760381	0.886049	acute_vs_healthy	Spinous-cell
DUBR.AS4	DUBR	2.75597e-83	-1.15846	1	1	1.87406e-79	0.486975	0.882361	-0.395386	acute_vs_healthy	Spinous-cell
DYRK3	DYRK3	3.26493e-83	-8.21209	1	1	2.22015e-79	0.000168402	0.823384	-0.823216	acute_vs_healthy	Spinous-cell
CCDC7.AS5	CCDC7	3.47636e-83	-3.4431	1	1	2.36393e-79	0.136525	0.99256	-0.856036	acute_vs_healthy	Spinous-cell
ADAL.AS2	ADAL	4.48491e-83	1.86847	1	1	3.04974e-79	0.900365	0.329211	0.571154	acute_vs_healthy	Spinous-cell
ZFP90	ZFP90	7.27366e-83	2.11193	1	1	4.94609e-79	0.851532	0.263864	0.587668	acute_vs_healthy	Spinous-cell
ENSG00000246090	ENSG00000246090	7.69409e-83	-2.37818	1	1	5.23198e-79	0.273576	0.993348	-0.719772	acute_vs_healthy	Spinous-cell
INTS6L.AS2	INTS6L	7.87527e-83	4.07464	1	1	5.35519e-79	0.632413	0.0383125	0.5941	acute_vs_healthy	Spinous-cell
MIRLET7BHG	MIRLET7BHG	1.20929e-82	4.98509	1	1	8.2232e-79	0.905558	0.0413413	0.864216	acute_vs_healthy	Spinous-cell
KMT2A.AS3	KMT2A	1.92931e-82	-0.910566	1	1	1.31193e-78	0.635039	0.989216	-0.354176	acute_vs_healthy	Spinous-cell
CCDC77	CCDC77	2.03944e-82	-3.39167	1	1	1.38682e-78	0.13537	0.983043	-0.847673	acute_vs_healthy	Spinous-cell
TSGA10.AS2	TSGA10	2.58073e-82	-3.78414	1	1	1.7549e-78	0.027088	0.456037	-0.428949	acute_vs_healthy	Spinous-cell
NEDD4L.AS2	NEDD4L	3.3777e-82	-4.41642	1	1	2.29684e-78	0.0514373	0.831338	-0.7799	acute_vs_healthy	Spinous-cell
MAFTRR.AS3	MAFTRR	5.05499e-82	-4.81674	1	1	3.4374e-78	0.0443283	0.996009	-0.95168	acute_vs_healthy	Spinous-cell
BBOF1.AS3	BBOF1	6.26124e-82	3.0708	1	1	4.25764e-78	0.978222	0.165426	0.812796	acute_vs_healthy	Spinous-cell
TCF7L2	TCF7L2	1.04578e-81	-6.13908	1	1	7.11134e-78	0.0105562	0.885365	-0.874809	acute_vs_healthy	Spinous-cell
MARK1.AS4	MARK1	1.12867e-81	-7.04903	1	1	7.67495e-78	0.0062319	0.87795	-0.871718	acute_vs_healthy	Spinous-cell
SENP5	SENP5	1.22461e-81	5.85812	1	1	8.32737e-78	0.91971	0.0153483	0.904362	acute_vs_healthy	Spinous-cell
TVP23C-CDRT4	TVP23C-CDRT4	1.64196e-81	3.79603	1	1	1.11653e-77	0.580053	0.0482708	0.531782	acute_vs_healthy	Spinous-cell
ARHGAP12	ARHGAP12	4.91022e-81	-3.80302	1	1	3.33895e-77	0.0810738	0.890168	-0.809094	acute_vs_healthy	Spinous-cell
KLF7.AS2	KLF7	6.07462e-81	-2.06973	1	1	4.13074e-77	0.290125	0.90345	-0.613325	acute_vs_healthy	Spinous-cell
LPIN1.AS2	LPIN1	7.93757e-81	-6.4876	1	1	5.39755e-77	0.000559388	0.346462	-0.345903	acute_vs_healthy	Spinous-cell
RUBCN.AS2	RUBCN	1.0177e-80	-5.97275	1	1	6.92037e-77	0.0109402	0.826353	-0.815412	acute_vs_healthy	Spinous-cell
ZSCAN5A	ZSCAN5A	1.25039e-80	2.83441	1	1	8.50263e-77	0.603084	0.0995126	0.503572	acute_vs_healthy	Spinous-cell
ZNF227	ZNF227	1.60517e-80	0.784144	1	1	1.09152e-76	0.98113	0.676136	0.304994	acute_vs_healthy	Spinous-cell
MDFI	MDFI	1.64838e-80	2.53015	1	1	1.1209e-76	0.977657	0.249236	0.728421	acute_vs_healthy	Spinous-cell
PARP11	PARP11	1.85782e-80	2.2813	1	1	1.26332e-76	0.488845	0.111631	0.377215	acute_vs_healthy	Spinous-cell
MROH1	MROH1	2.22692e-80	4.02831	1	1	1.51431e-76	0.522758	0.0346387	0.488119	acute_vs_healthy	Spinous-cell
F3	F3	2.87525e-80	2.30424	1	1	1.95517e-76	0.641382	0.160094	0.481288	acute_vs_healthy	Spinous-cell
ATPSCKMT	ATPSCKMT	3.51306e-80	-1.75343	1	1	2.38888e-76	0.387649	0.969628	-0.581979	acute_vs_healthy	Spinous-cell
TNC.AS2	TNC	3.77953e-80	1.32245	1	1	2.57008e-76	0.907072	0.458041	0.449031	acute_vs_healthy	Spinous-cell
ZNF502	ZNF502	4.69741e-80	-4.57037	1	1	3.19424e-76	0.0476302	0.939428	-0.891798	acute_vs_healthy	Spinous-cell
RALGPS1	RALGPS1	6.19426e-80	2.79792	1	1	4.21209e-76	0.916764	0.189926	0.726839	acute_vs_healthy	Spinous-cell
UHRF2.AS2	UHRF2	1.32725e-79	0.831596	1	1	9.02532e-76	0.98163	0.657973	0.323657	acute_vs_healthy	Spinous-cell
WDPCP	WDPCP	1.40926e-79	0.937835	1	1	9.58293e-76	0.949658	0.602824	0.346834	acute_vs_healthy	Spinous-cell
PPARGC1B	PPARGC1B	2.59044e-79	1.3129	1	1	1.7615e-75	0.650896	0.307773	0.343122	acute_vs_healthy	Spinous-cell
MYO5A.AS7	MYO5A	3.64053e-79	-4.6303	1	1	2.47556e-75	0.0510725	0.868654	-0.817581	acute_vs_healthy	Spinous-cell
C6orf52	C6orf52	4.03939e-79	-5.59528	1	1	2.74679e-75	0.0122289	0.701488	-0.689259	acute_vs_healthy	Spinous-cell
SLC9B2.AS3	SLC9B2	5.1542e-79	-2.95704	1	1	3.50486e-75	0.1569	0.873986	-0.717086	acute_vs_healthy	Spinous-cell
ZMYM4	ZMYM4	6.32689e-79	5.3729	1	1	4.30229e-75	0.847783	0.0249796	0.822804	acute_vs_healthy	Spinous-cell
PRELID3A.AS2	PRELID3A	6.40592e-79	-4.00127	1	1	4.35602e-75	0.0914266	0.983438	-0.892012	acute_vs_healthy	Spinous-cell
SIN3B	SIN3B	1.24274e-78	1.31159	1	1	8.4506e-75	0.83704	0.419554	0.417486	acute_vs_healthy	Spinous-cell
ZFYVE16	ZFYVE16	1.60886e-78	-4.73188	1	1	1.09403e-74	0.0462342	0.913749	-0.867514	acute_vs_healthy	Spinous-cell
ZCWPW1.AS2	ZCWPW1	2.59913e-78	4.48394	1	1	1.76741e-74	0.624639	0.0230315	0.601607	acute_vs_healthy	Spinous-cell
NRIP1	NRIP1	2.61513e-78	5.0039	1	1	1.77829e-74	0.774564	0.0284009	0.746163	acute_vs_healthy	Spinous-cell
BCORL1.AS2	BCORL1	4.12131e-78	2.28212	1	1	2.80249e-74	0.925761	0.267813	0.657947	acute_vs_healthy	Spinous-cell
MLLT3	MLLT3	4.41184e-78	1.02803	1	1	3.00005e-74	0.933348	0.558023	0.375325	acute_vs_healthy	Spinous-cell
STIL	STIL	1.63968e-77	-2.15593	1	1	1.11498e-73	0.255693	0.853713	-0.59802	acute_vs_healthy	Spinous-cell
ENSG00000290927.AS3	ENSG00000290927	1.99492e-77	-1.98434	1	1	1.35655e-73	0.174029	0.581003	-0.406974	acute_vs_healthy	Spinous-cell
NCOA7	NCOA7	2.12228e-77	-0.76372	1	1	1.44315e-73	0.681474	0.989215	-0.307741	acute_vs_healthy	Spinous-cell
NPHP3.AS3	NPHP3	3.73621e-77	-1.66339	1	1	2.54062e-73	0.290802	0.74344	-0.452638	acute_vs_healthy	Spinous-cell
TCOF1.AS2	TCOF1	8.16149e-77	4.25543	1	1	5.54981e-73	0.807509	0.0567225	0.750787	acute_vs_healthy	Spinous-cell
EXOG.AS2	EXOG	8.48367e-77	-1.89382	1	1	5.7689e-73	0.136371	0.444002	-0.307632	acute_vs_healthy	Spinous-cell
ZNF91.AS2	ZNF91	1.29335e-76	2.17487	1	1	8.7948e-73	0.991668	0.302319	0.689349	acute_vs_healthy	Spinous-cell
NIPAL1	NIPAL1	2.21178e-76	0.952942	1	1	1.50401e-72	0.96342	0.606166	0.357254	acute_vs_healthy	Spinous-cell
ZNF613.AS3	ZNF613	6.93176e-76	0.96389	1	1	4.7136e-72	0.945136	0.591298	0.353838	acute_vs_healthy	Spinous-cell
ATF7IP2.AS2	ATF7IP2	8.54423e-76	-3.40452	1	1	5.81007e-72	0.101634	0.818932	-0.717298	acute_vs_healthy	Spinous-cell
LRCH3.AS3	LRCH3	1.05337e-75	-0.803009	1	1	7.16291e-72	0.653203	0.966624	-0.313421	acute_vs_healthy	Spinous-cell
FAM13A.AS2	FAM13A	1.9107e-75	-1.54167	1	1	1.29928e-71	0.423172	0.948838	-0.525666	acute_vs_healthy	Spinous-cell
SBF2.AS3	SBF2	2.27582e-75	-3.81701	1	1	1.54756e-71	0.0247651	0.46678	-0.442015	acute_vs_healthy	Spinous-cell
CHD1.AS2	CHD1	2.65127e-75	-2.01885	1	1	1.80286e-71	0.19579	0.666976	-0.471186	acute_vs_healthy	Spinous-cell
ANKRD26.AS5	ANKRD26	2.98332e-75	-1.57377	1	1	2.02866e-71	0.395275	0.909794	-0.514519	acute_vs_healthy	Spinous-cell
STRN3.AS2	STRN3	3.06824e-75	3.41202	1	1	2.0864e-71	0.592427	0.0644418	0.527985	acute_vs_healthy	Spinous-cell
DMPK	DMPK	3.37707e-75	2.91992	1	1	2.29641e-71	0.720828	0.11921	0.601619	acute_vs_healthy	Spinous-cell
ALDH3B1	ALDH3B1	3.58977e-75	-6.95885	1	1	2.44104e-71	0.00390537	0.822668	-0.818762	acute_vs_healthy	Spinous-cell
MEAK7	MEAK7	5.63619e-75	4.98126	1	1	3.83261e-71	0.638225	0.021243	0.616982	acute_vs_healthy	Spinous-cell
AHI1.AS10	AHI1	6.7756e-75	2.83168	1	1	4.60741e-71	0.969828	0.189372	0.780456	acute_vs_healthy	Spinous-cell
POFUT1.AS2	POFUT1	3.11762e-74	1.86743	1	1	2.11998e-70	0.936271	0.34434	0.591931	acute_vs_healthy	Spinous-cell
DENND1B.AS2	DENND1B	3.35551e-74	-3.63878	1	1	2.28174e-70	0.0283929	0.438724	-0.410331	acute_vs_healthy	Spinous-cell
ENAH.AS2	ENAH	3.59988e-74	1.29126	1	1	2.44792e-70	0.771976	0.389513	0.382463	acute_vs_healthy	Spinous-cell
TMEM260	TMEM260	3.90328e-74	2.44713	1	1	2.65423e-70	0.82084	0.203064	0.617776	acute_vs_healthy	Spinous-cell
WDCP	WDCP	4.30235e-74	0.91848	1	1	2.92559e-70	0.941497	0.599896	0.3416	acute_vs_healthy	Spinous-cell
HOTAIR	HOTAIR	4.99833e-74	-2.49081	1	1	3.39887e-70	0.0958501	0.488901	-0.393051	acute_vs_healthy	Spinous-cell
ARMCX4	ARMCX4	1.01036e-73	-2.61686	1	1	6.87047e-70	0.0791734	0.450523	-0.371349	acute_vs_healthy	Spinous-cell
AUTS2.AS2	AUTS2	3.09582e-73	4.43909	1	1	2.10516e-69	0.72527	0.0375798	0.68769	acute_vs_healthy	Spinous-cell
CDNF	CDNF	3.9037e-73	0.855803	1	1	2.65452e-69	0.940679	0.621874	0.318805	acute_vs_healthy	Spinous-cell
ZNF383.AS2	ZNF383	5.0744e-73	-1.98252	1	1	3.45059e-69	0.317025	0.932814	-0.615789	acute_vs_healthy	Spinous-cell
CNTRL.AS4	CNTRL	6.72798e-73	1.80563	1	1	4.57503e-69	0.976307	0.381385	0.594922	acute_vs_healthy	Spinous-cell
C6orf52.AS2	C6orf52	9.27148e-73	-2.89064	1	1	6.30461e-69	0.0450608	0.355389	-0.310328	acute_vs_healthy	Spinous-cell
FANCM.AS9	FANCM	1.83075e-72	1.27968	1	1	1.24491e-68	0.573137	0.267392	0.305746	acute_vs_healthy	Spinous-cell
EPB41L1.AS5	EPB41L1	2.7108e-72	-1.87608	1	1	1.84334e-68	0.192067	0.601294	-0.409227	acute_vs_healthy	Spinous-cell
MTRF1.AS2	MTRF1	4.2826e-72	1.42674	1	1	2.91217e-68	0.6655	0.294575	0.370925	acute_vs_healthy	Spinous-cell
IRAK4.AS3	IRAK4	1.06395e-71	-1.71462	1	1	7.23489e-68	0.314459	0.826624	-0.512165	acute_vs_healthy	Spinous-cell
ENSG00000291100.AS2	ENSG00000291100	1.76061e-71	4.20573	1	1	1.19721e-67	0.928567	0.0680841	0.860483	acute_vs_healthy	Spinous-cell
NABP1	NABP1	2.18236e-71	-1.08011	1	1	1.484e-67	0.55987	0.964795	-0.404925	acute_vs_healthy	Spinous-cell
CARD14	CARD14	2.45045e-71	2.41822	1	1	1.6663e-67	0.596282	0.137535	0.458748	acute_vs_healthy	Spinous-cell
METAP1D	METAP1D	4.30414e-71	-4.16248	1	1	2.92682e-67	0.0513715	0.849636	-0.798265	acute_vs_healthy	Spinous-cell
CSPP1.AS5	CSPP1	1.03066e-70	3.70324	1	1	7.0085e-67	0.656375	0.0625006	0.593875	acute_vs_healthy	Spinous-cell
MFSD4B	MFSD4B	2.1713e-70	-1.52517	1	1	1.47649e-66	0.406026	0.913046	-0.50702	acute_vs_healthy	Spinous-cell
DTNB.AS2	DTNB	3.7794e-70	1.86527	1	1	2.56999e-66	0.68203	0.231147	0.450883	acute_vs_healthy	Spinous-cell
TMEM260.AS2	TMEM260	4.59119e-70	-2.30962	1	1	3.12201e-66	0.203713	0.802227	-0.598514	acute_vs_healthy	Spinous-cell
FOXN2	FOXN2	5.50372e-70	-1.66207	1	1	3.74253e-66	0.232568	0.622025	-0.389457	acute_vs_healthy	Spinous-cell
TLN1	TLN1	8.20233e-70	1.70759	1	1	5.57759e-66	0.891816	0.349975	0.541841	acute_vs_healthy	Spinous-cell
GPCPD1	GPCPD1	1.49338e-69	1.35357	1	1	1.0155e-65	0.795463	0.388424	0.407039	acute_vs_healthy	Spinous-cell
TAF8.AS2	TAF8	1.56892e-69	-1.18978	1	1	1.06686e-65	0.475696	0.886751	-0.411055	acute_vs_healthy	Spinous-cell
CNTNAP3B.AS2	CNTNAP3B	2.85156e-69	-1.72391	1	1	1.93906e-65	0.24875	0.679595	-0.430845	acute_vs_healthy	Spinous-cell
ZNF383	ZNF383	3.22555e-69	1.34563	1	1	2.19337e-65	0.587411	0.26765	0.319761	acute_vs_healthy	Spinous-cell
NDUFAF7.AS2	NDUFAF7	9.51017e-69	-1.9089	1	1	6.46692e-65	0.235954	0.722835	-0.486882	acute_vs_healthy	Spinous-cell
DHX30	DHX30	1.40136e-68	1.45784	1	1	9.52922e-65	0.955633	0.450285	0.505348	acute_vs_healthy	Spinous-cell
CAB39L	CAB39L	3.07921e-68	3.23108	1	1	2.09386e-64	0.429283	0.0410234	0.38826	acute_vs_healthy	Spinous-cell
ETFDH	ETFDH	3.06537e-67	1.43114	1	1	2.08445e-63	0.95383	0.451004	0.502826	acute_vs_healthy	Spinous-cell
DONSON	DONSON	5.9716e-67	2.11373	1	1	4.06069e-63	0.766561	0.226714	0.539847	acute_vs_healthy	Spinous-cell
DZIP1L	DZIP1L	1.00744e-66	3.87898	1	1	6.85057e-63	0.325342	0.0190896	0.306252	acute_vs_healthy	Spinous-cell
C8orf44	C8orf44	1.11889e-66	-2.8913	1	1	7.60847e-63	0.0456229	0.363834	-0.318211	acute_vs_healthy	Spinous-cell
ZSCAN32	ZSCAN32	3.90445e-66	2.98199	1	1	2.65503e-62	0.576135	0.0758604	0.500274	acute_vs_healthy	Spinous-cell
PPP2R3C.AS3	PPP2R3C	2.02048e-65	1.49582	1	1	1.37392e-61	0.939235	0.430207	0.509028	acute_vs_healthy	Spinous-cell
AGPAT3	AGPAT3	8.17055e-65	-2.18937	1	1	5.55597e-61	0.156411	0.642176	-0.485765	acute_vs_healthy	Spinous-cell
CYP20A1	CYP20A1	1.57354e-64	2.06429	1	1	1.07001e-60	0.882497	0.288976	0.59352	acute_vs_healthy	Spinous-cell
UPF3B	UPF3B	3.49336e-64	2.47007	1	1	2.37548e-60	0.626669	0.133254	0.493415	acute_vs_healthy	Spinous-cell
NUTM2A-AS1.AS3	NUTM2A-AS1	4.92676e-64	2.42284	1	1	3.3502e-60	0.731996	0.170851	0.561146	acute_vs_healthy	Spinous-cell
CHORDC1	CHORDC1	2.94547e-63	-3.35599	1	1	2.00292e-59	0.0747533	0.766335	-0.691582	acute_vs_healthy	Spinous-cell
UBE3A	UBE3A	3.8413e-63	1.21636	1	1	2.61208e-59	0.943176	0.50539	0.437786	acute_vs_healthy	Spinous-cell
CACTIN	CACTIN	1.41931e-62	2.25602	1	1	9.65128e-59	0.681445	0.176536	0.504909	acute_vs_healthy	Spinous-cell
TUBD1.AS6	TUBD1	1.51374e-62	1.48083	1	1	1.02934e-58	0.945726	0.437125	0.508601	acute_vs_healthy	Spinous-cell
NME6	NME6	3.34298e-62	-1.27358	1	1	2.27323e-58	0.392229	0.793558	-0.401329	acute_vs_healthy	Spinous-cell
LRRC8A	LRRC8A	6.39095e-62	1.63517	1	1	4.34584e-58	0.663792	0.255425	0.408367	acute_vs_healthy	Spinous-cell
PAOX	PAOX	1.12187e-61	1.13448	1	1	7.62871e-58	0.790369	0.437295	0.353074	acute_vs_healthy	Spinous-cell
ATAT1	ATAT1	1.23719e-61	2.5695	1	1	8.41287e-58	0.830296	0.185332	0.644965	acute_vs_healthy	Spinous-cell
PLSCR1	PLSCR1	1.48045e-61	1.36965	1	1	1.0067e-57	0.904418	0.439855	0.464563	acute_vs_healthy	Spinous-cell
CCDC126	CCDC126	7.71011e-61	1.43766	1	1	5.24288e-57	0.894319	0.422615	0.471704	acute_vs_healthy	Spinous-cell
CREBBP	CREBBP	7.82408e-61	-1.34306	1	1	5.32038e-57	0.389155	0.806211	-0.417056	acute_vs_healthy	Spinous-cell
TMEM116	TMEM116	1.47962e-60	2.48307	1	1	1.00614e-56	0.730081	0.165466	0.564614	acute_vs_healthy	Spinous-cell
TDP1.AS4	TDP1	5.18301e-60	-1.43238	1	1	3.52445e-56	0.37064	0.828139	-0.457499	acute_vs_healthy	Spinous-cell
OPA1.AS6	OPA1	1.25246e-59	1.3613	1	1	8.51673e-56	0.641803	0.295091	0.346712	acute_vs_healthy	Spinous-cell
SBF2-AS1	SBF2-AS1	1.51592e-59	-1.78125	1	1	1.03082e-55	0.141347	0.482519	-0.341173	acute_vs_healthy	Spinous-cell
ZNF33B	ZNF33B	1.53874e-58	1.95975	1	1	1.04634e-54	0.641522	0.200979	0.440544	acute_vs_healthy	Spinous-cell
GCH1.AS2	GCH1	6.87429e-58	2.26246	1	1	4.67452e-54	0.772605	0.205547	0.567058	acute_vs_healthy	Spinous-cell
CYP20A1.AS2	CYP20A1	1.01919e-56	1.37347	1	1	6.93052e-53	0.78641	0.375655	0.410754	acute_vs_healthy	Spinous-cell
THEM4	THEM4	3.65375e-56	-2.38809	1	1	2.48455e-52	0.108274	0.569228	-0.460954	acute_vs_healthy	Spinous-cell
SEPTIN9.AS2	SEPTIN9	7.36782e-56	0.810343	1	1	5.01012e-52	0.944908	0.628906	0.316002	acute_vs_healthy	Spinous-cell
SHLD2	SHLD2	8.16432e-56	2.49253	1	1	5.55174e-52	0.398354	0.0754791	0.322875	acute_vs_healthy	Spinous-cell
MIA2	MIA2	4.89071e-55	-1.82785	1	1	3.32568e-51	0.251273	0.747156	-0.495883	acute_vs_healthy	Spinous-cell
PTPN3	PTPN3	4.55021e-54	-1.39344	1	1	3.09414e-50	0.253372	0.606265	-0.352893	acute_vs_healthy	Spinous-cell
ELF2	ELF2	1.16557e-53	1.51436	1	1	7.92589e-50	0.497148	0.192474	0.304674	acute_vs_healthy	Spinous-cell
ENDOV.AS4	ENDOV	1.50768e-53	1.6847	1	1	1.02522e-49	0.725184	0.27849	0.446694	acute_vs_healthy	Spinous-cell
KDM1A	KDM1A	3.20002e-53	-1.62073	1	1	2.17601e-49	0.354463	0.87791	-0.523447	acute_vs_healthy	Spinous-cell
FAM221A	FAM221A	3.29688e-53	1.85391	1	1	2.24188e-49	0.490664	0.146683	0.343981	acute_vs_healthy	Spinous-cell
PPIP5K2.AS2	PPIP5K2	4.73156e-53	-1.48439	1	1	3.21746e-49	0.19795	0.543111	-0.345162	acute_vs_healthy	Spinous-cell
SRPK2.AS2	SRPK2	1.18461e-52	-1.09492	1	1	8.05536e-49	0.501364	0.903064	-0.4017	acute_vs_healthy	Spinous-cell
PPIP5K2	PPIP5K2	1.88718e-49	1.42962	1	1	1.28328e-45	0.542849	0.234517	0.308332	acute_vs_healthy	Spinous-cell
N4BP1	N4BP1	1.05688e-47	2.77153	1	1	7.1868e-44	0.823897	0.143652	0.680245	acute_vs_healthy	Spinous-cell
ENSG00000291152.AS2	ENSG00000291152	3.57821e-47	-0.782922	1	1	2.43318e-43	0.611801	0.913764	-0.301962	acute_vs_healthy	Spinous-cell
DSTYK	DSTYK	5.81397e-47	-2.8089	1	1	3.9535e-43	0.0574883	0.47715	-0.419662	acute_vs_healthy	Spinous-cell
ETNK1.AS2	ETNK1	9.90979e-47	-2.02203	1	1	6.73866e-43	0.103778	0.48803	-0.384252	acute_vs_healthy	Spinous-cell
UEVLD.AS6	UEVLD	6.44271e-46	-1.27237	1	1	4.38104e-42	0.44515	0.889501	-0.444351	acute_vs_healthy	Spinous-cell
RAD1	RAD1	1.9672e-44	1.46969	1	1	1.33769e-40	0.737803	0.325834	0.411969	acute_vs_healthy	Spinous-cell
AADACL2	AADACL2	2.194e-44	-1.85755	1	1	1.49192e-40	0.229195	0.744466	-0.515271	acute_vs_healthy	Spinous-cell
UQCC6.AS2	UQCC6	3.5994e-44	-1.42738	1	1	2.44759e-40	0.351739	0.797095	-0.445356	acute_vs_healthy	Spinous-cell
FGGY.AS10	FGGY	1.47088e-41	1.59704	1	1	1.0002e-37	0.796808	0.317298	0.47951	acute_vs_healthy	Spinous-cell
LTBP4.AS2	LTBP4	5.17168e-41	1.79409	1	1	3.51674e-37	0.608594	0.194374	0.414219	acute_vs_healthy	Spinous-cell
PABIR2	PABIR2	6.50718e-41	1.82857	1	1	4.42488e-37	0.624318	0.200752	0.423566	acute_vs_healthy	Spinous-cell
ZNF655	ZNF655	8.25868e-41	0.915493	1	1	5.6159e-37	0.8756	0.547415	0.328185	acute_vs_healthy	Spinous-cell
NAAA	NAAA	1.94627e-40	1.61281	1	1	1.32346e-36	0.514301	0.182111	0.332191	acute_vs_healthy	Spinous-cell
C6orf136	C6orf136	2.50103e-36	-1.28907	1	1	1.7007e-32	0.265243	0.617994	-0.352751	acute_vs_healthy	Spinous-cell
TBRG1.AS2	TBRG1	3.94121e-36	1.39431	1	1	2.68002e-32	0.570793	0.25355	0.317244	acute_vs_healthy	Spinous-cell
NLRP1	NLRP1	2.58624e-35	2.18904	1	1	1.75865e-31	0.489731	0.09782	0.391911	acute_vs_healthy	Spinous-cell
PML	PML	5.79313e-35	1.16823	1	1	3.93933e-31	0.727719	0.383861	0.343858	acute_vs_healthy	Spinous-cell
RNF213	RNF213	1.28052e-34	1.72166	1	1	8.70754e-31	0.455057	0.139514	0.315543	acute_vs_healthy	Spinous-cell
MACF1.AS2	MACF1	9.59584e-34	1.59538	1	1	6.52517e-30	0.545405	0.190268	0.355137	acute_vs_healthy	Spinous-cell
EGLN1	EGLN1	7.79436e-33	2.199	1	1	5.30016e-29	0.41126	0.0890996	0.322161	acute_vs_healthy	Spinous-cell
WDR26.AS2	WDR26	8.9993e-28	1.76513	1	1	6.11952e-24	0.541063	0.1706	0.370463	acute_vs_healthy	Spinous-cell
PPHLN1.AS2	PPHLN1	1.30322e-26	1.81422	1	1	8.86188e-23	0.432941	0.115358	0.317583	acute_vs_healthy	Spinous-cell
LINC01550	LINC01550	2.76773e-26	1.57908	1	1	1.88206e-22	0.640671	0.249216	0.391455	acute_vs_healthy	Spinous-cell
SLC66A2	SLC66A2	1.59034e-22	1.5713	1	1	1.08143e-18	0.50205	0.173097	0.328953	acute_vs_healthy	Spinous-cell

## Sheet: Table S8.2
Table S8.2 GO enrichment analysis of genes associated with PSI markers (post-wound day 7 vs normal skin) related to Fig 4F.
ID	Description	GeneRatio	BgRatio	pvalue	p.adjust	qvalue	geneID	Count	celltype
GO:1902275	regulation of chromatin organization	6/204	49/18870	1.40816e-05	0.011376	0.010942	KDM1A/MLLT3/KANSL1/ATF7IP2/TLK2/PPHLN1	6	BasalCell
GO:0010332	response to gamma radiation	6/204	51/18870	1.78126e-05	0.011376	0.010942	ATR/CHEK2/KDM1A/YAP1/PML/TLK2	6	BasalCell
GO:0010212	response to ionizing radiation	9/204	138/18870	1.94691e-05	0.011376	0.010942	ATR/CHEK2/KDM1A/YAP1/NABP1/PML/RAD54L/TLK2/RAD1	9	BasalCell
GO:0009314	response to radiation	15/204	428/18870	6.80936e-05	0.0296094	0.0284799	NLRP1/CREBBP/ATR/CHEK2/KDM1A/YAP1/NABP1/KMT2A/N4BP1/PML/CNGB1/RAD54L/TLK2/RAD1/BEST1	15	BasalCell
GO:0071479	cellular response to ionizing radiation	6/204	70/18870	0.000109377	0.0407665	0.0392114	ATR/CHEK2/KDM1A/YAP1/TLK2/RAD1	6	BasalCell
GO:0018205	peptidyl-lysine modification	10/204	219/18870	0.000140322	0.0457626	0.0440169	CREBBP/UHRF2/ATAT1/PLOD2/KMT2A/KANSL1/PML/SENP5/ATPSCKMT/AUTS2	10	BasalCell
GO:0071478	cellular response to radiation	9/204	181/18870	0.000160122	0.0464177	0.0446469	NLRP1/CREBBP/ATR/CHEK2/KDM1A/YAP1/N4BP1/TLK2/RAD1	9	BasalCell
GO:0051899	membrane depolarization	6/204	80/18870	0.000229239	0.0598084	0.0575268	PTPN3/NEDD4L/KMT2A/CNGB1/ANK3/PPP2R3C	6	BasalCell
GO:0051090	regulation of DNA-binding transcription factor activity	12/204	406/18870	0.00160571	0.21895	0.210597	LRP8/KDM1A/CARD14/CACTIN/EGLN1/MDFI/CLEC7A/HCK/TCF7L2/CDKN2A/PPARGC1B/TIRAP	12	BasalCell
GO:0006302	double-strand break repair	10/204	307/18870	0.00193018	0.21895	0.210597	ATR/CHEK2/KDM1A/NABP1/PML/RAD54L/ZCWPW1/SHLD2/TDP1/FANCM	10	BasalCell
GO:1902275	regulation of chromatin organization	6/207	49/18870	1.52973e-05	0.0300593	0.029284	KDM1A/MLLT3/KANSL1/ATF7IP2/TLK2/PPHLN1	6	BasalProlif
GO:0010212	response to ionizing radiation	8/207	138/18870	0.00014365	0.1024	0.0997592	ATR/KDM1A/YAP1/NABP1/PML/RAD54L/TLK2/RAD1	8	BasalProlif
GO:0018205	peptidyl-lysine modification	10/207	219/18870	0.000158089	0.1024	0.0997592	CREBBP/UHRF2/ATAT1/PLOD2/KMT2A/KANSL1/PML/SENP5/ATPSCKMT/AUTS2	10	BasalProlif
GO:0009314	response to radiation	14/207	428/18870	0.000282477	0.105082	0.102372	NLRP1/CREBBP/ATR/KDM1A/YAP1/NABP1/KMT2A/N4BP1/PML/CNGB1/RAD54L/TLK2/RAD1/BEST1	14	BasalProlif
GO:0071478	cellular response to radiation	8/207	181/18870	0.000886568	0.231941	0.225959	NLRP1/CREBBP/ATR/KDM1A/YAP1/N4BP1/TLK2/RAD1	8	BasalProlif
GO:0006997	nucleus organization	7/207	144/18870	0.00106885	0.231941	0.225959	SRPK2/DMPK/PML/PARP11/DYRK3/NEMP1/LPIN1	7	BasalProlif
GO:0031334	positive regulation of protein-containing complex assembly	8/207	198/18870	0.00157442	0.268578	0.261651	ATR/AMBRA1/NRG1/ATAT1/CLEC7A/HCK/TIRAP/FERMT1	8	BasalProlif
GO:0001952	regulation of cell-matrix adhesion	6/207	125/18870	0.00257848	0.328103	0.319641	MACF1/WDPCP/SLK/TLN1/CDKN2A/FERMT1	6	BasalProlif
GO:2000779	regulation of double-strand break repair	6/207	133/18870	0.00350776	0.338304	0.329579	ATR/KDM1A/PML/ZCWPW1/SHLD2/HELQ	6	BasalProlif
GO:0048813	dendrite morphogenesis	6/207	139/18870	0.00435318	0.404846	0.394405	LRP8/ABI2/NEDD4L/MAP2/BTBD3/KLF7	6	BasalProlif
GO:1902275	regulation of chromatin organization	6/202	49/18870	1.33155e-05	0.0105543	0.0101648	KDM1A/MLLT3/KANSL1/ATF7IP2/TLK2/PPHLN1	6	SpinousCell
GO:0010332	response to gamma radiation	6/202	51/18870	1.68466e-05	0.0105543	0.0101648	ATR/CHEK2/KDM1A/YAP1/PML/TLK2	6	SpinousCell
GO:0010212	response to ionizing radiation	9/202	138/18870	1.80051e-05	0.0105543	0.0101648	ATR/CHEK2/KDM1A/YAP1/NABP1/PML/RAD54L/TLK2/RAD1	9	SpinousCell
GO:0009314	response to radiation	15/202	428/18870	6.08744e-05	0.0255267	0.0245847	NLRP1/CREBBP/ATR/CHEK2/KDM1A/YAP1/NABP1/KMT2A/N4BP1/PML/CNGB1/RAD54L/TLK2/RAD1/BEST1	15	SpinousCell
GO:0071479	cellular response to ionizing radiation	6/202	70/18870	0.000103622	0.0372448	0.0358705	ATR/CHEK2/KDM1A/YAP1/TLK2/RAD1	6	SpinousCell
GO:0018205	peptidyl-lysine modification	10/202	219/18870	0.00012944	0.0407088	0.0392066	CREBBP/UHRF2/ATAT1/PLOD2/KMT2A/KANSL1/PML/SENP5/ATPSCKMT/AUTS2	10	SpinousCell
GO:0071478	cellular response to radiation	9/202	181/18870	0.00014868	0.0415643	0.0400306	NLRP1/CREBBP/ATR/CHEK2/KDM1A/YAP1/N4BP1/TLK2/RAD1	9	SpinousCell
GO:0006997	nucleus organization	7/202	144/18870	0.000927099	0.164792	0.158711	SRPK2/DMPK/PML/PARP11/DYRK3/NEMP1/LPIN1	7	SpinousCell
GO:0051090	regulation of DNA-binding transcription factor activity	12/202	406/18870	0.00147724	0.183934	0.177147	LRP8/KDM1A/CARD14/CACTIN/EGLN1/MDFI/CLEC7A/HCK/TCF7L2/CDKN2A/PPARGC1B/TIRAP	12	SpinousCell
GO:0006302	double-strand break repair	10/202	307/18870	0.00179517	0.183934	0.177147	ATR/CHEK2/KDM1A/NABP1/PML/RAD54L/ZCWPW1/SHLD2/TDP1/FANCM	10	SpinousCell
GO:0010212	response to ionizing radiation	10/240	138/18870	1.09466e-05	0.0205501	0.0197791	ATR/CHEK2/KDM1A/SPIDR/YAP1/NABP1/PML/RAD54L/TLK2/RAD1	10	ImmuneCell
GO:0071479	cellular response to ionizing radiation	7/240	70/18870	2.99131e-05	0.0205501	0.0197791	ATR/CHEK2/KDM1A/SPIDR/YAP1/TLK2/RAD1	7	ImmuneCell
GO:0009314	response to radiation	17/240	428/18870	3.64484e-05	0.0205501	0.0197791	NLRP1/CREBBP/ATR/CHEK2/KDM1A/SPIDR/YAP1/NABP1/KMT2A/N4BP1/PML/CNGB1/RAD54L/TLK2/CCDC66/RAD1/BEST1	17	ImmuneCell
GO:0010332	response to gamma radiation	6/240	51/18870	4.43687e-05	0.0205501	0.0197791	ATR/CHEK2/KDM1A/YAP1/PML/TLK2	6	ImmuneCell
GO:0051899	membrane depolarization	7/240	80/18870	7.11793e-05	0.0282582	0.027198	PTPN3/NEDD4L/KMT2A/CNGB1/ANK3/P2RX4/PPP2R3C	7	ImmuneCell
GO:0071478	cellular response to radiation	10/240	181/18870	0.000111168	0.0386171	0.0371683	NLRP1/CREBBP/ATR/CHEK2/KDM1A/SPIDR/YAP1/N4BP1/TLK2/RAD1	10	ImmuneCell
GO:0030330	DNA damage response, signal transduction by p53 class mediator	6/240	73/18870	0.000332334	0.0923556	0.0888906	ATR/CHEK2/KDM1A/CD44/PML/DYRK3	6	ImmuneCell
GO:0018205	peptidyl-lysine modification	10/240	219/18870	0.000514293	0.108167	0.104108	CREBBP/UHRF2/ATAT1/PLOD2/KMT2A/KANSL1/PML/SENP5/ATPSCKMT/AUTS2	10	ImmuneCell
GO:0006479	protein methylation	6/240	80/18870	0.00054492	0.108167	0.104108	PRMT7/KMT2A/KANSL1/ATPSCKMT/AUTS2/NDUFAF7	6	ImmuneCell
GO:0008213	protein alkylation	6/240	80/18870	0.00054492	0.108167	0.104108	PRMT7/KMT2A/KANSL1/ATPSCKMT/AUTS2/NDUFAF7	6	ImmuneCell
GO:0010332	response to gamma radiation	6/218	51/18870	2.59015e-05	0.0224493	0.0218158	ATR/CHEK2/KDM1A/YAP1/PML/TLK2	6	Melanocyte
GO:0010212	response to ionizing radiation	9/218	138/18870	3.28447e-05	0.0224493	0.0218158	ATR/CHEK2/KDM1A/YAP1/NABP1/PML/RAD54L/TLK2/RAD1	9	Melanocyte
GO:0009314	response to radiation	15/218	428/18870	0.00014315	0.0716114	0.0695904	NLRP1/CREBBP/ATR/CHEK2/KDM1A/YAP1/NABP1/KMT2A/N4BP1/PML/CNGB1/RAD54L/TLK2/RAD1/BEST1	15	Melanocyte
GO:0071479	cellular response to ionizing radiation	6/218	70/18870	0.000157158	0.0716114	0.0695904	ATR/CHEK2/KDM1A/YAP1/TLK2/RAD1	6	Melanocyte
GO:0018205	peptidyl-lysine modification	10/218	219/18870	0.000240334	0.0797794	0.0775279	CREBBP/UHRF2/ATAT1/PLOD2/KMT2A/KANSL1/PML/SENP5/ATPSCKMT/AUTS2	10	Melanocyte
GO:0071478	cellular response to radiation	9/218	181/18870	0.000262624	0.0797794	0.0775279	NLRP1/CREBBP/ATR/CHEK2/KDM1A/YAP1/N4BP1/TLK2/RAD1	9	Melanocyte
GO:0051899	membrane depolarization	6/218	80/18870	0.000327326	0.089491	0.0869654	PTPN3/NEDD4L/KMT2A/CNGB1/ANK3/PPP2R3C	6	Melanocyte
GO:1901987	regulation of cell cycle phase transition	14/218	456/18870	0.000884487	0.180061	0.17498	ATR/CHEK2/AMBRA1/NABP1/HORMAD1/PML/CDKN2A/STIL/ATF2/DBF4B/DYRK3/DONSON/RAD1/ZNF655	14	Melanocyte
GO:0051090	regulation of DNA-binding transcription factor activity	13/218	406/18870	0.000919537	0.180061	0.17498	LRP8/KDM1A/CARD14/CACTIN/EGLN1/MDFI/CLEC7A/FER/TCF7L2/CDKN2A/ATF2/PPARGC1B/TIRAP	13	Melanocyte
GO:0006302	double-strand break repair	11/218	307/18870	0.00092204	0.180061	0.17498	ATR/CHEK2/KDM1A/NABP1/PML/POGZ/RAD54L/ZCWPW1/SHLD2/TDP1/FANCM	11	Melanocyte
