# Supplementary material
Source: Research Square preprint supplement (doi:10.21203/rs.3.rs-9917999/v1)
Supplement: Supplementary file 7 [file 990f02cb795f13df52bbc34c.xlsx]

## Sheet: Table S5.1
Table S5.1 Significant isoform-switching events in fibroblasts between post-wound day 7 and normal skin.
isoforms	GeneName	FB_SF_tpm_isoform-FB_WF_tpm_isoform_dPSI	FB_SF_tpm_isoform-FB_WF_tpm_isoform_p-val	Sig
FB-PB.1717.1	ARHGAP11A	0.663912	0.000999001	Up
FB-PB.2721.1	XPO1	0.516336	0	Up
FB-PB.133.2	KIF2C	0.502835	0.00599401	Up
FB-PB.752.3	LZTS2	0.456313	0.00549451	Up
FB-PB.2431.1	DPP9	0.444265	0.00599401	Up
FB-PB.1684.2	GOLGA5	0.426398	0.000999001	Up
FB-PB.1529.1	CHAMP1	0.40534	0.00899101	Up
FB-PB.4497.2	HERPUD2	0.390711	0.00749251	Up
FB-PB.400.2	KIFAP3	0.370937	0.003996	Up
FB-PB.90.8	PTP4A2	0.363247	0.0164835	Up
FB-PB.4963.2	ACO1	0.350699	0.013986	Up
FB-PB.415.2	TOR1AIP1	0.348532	0.003996	Up
FB-PB.1131.4	BCAT1	0.346234	0.0237263	Up
FB-PB.1020.3	BIRC2	0.343842	0.0104895	Up
FB-PB.1217.2	SLC16A7	0.338209	0.012987	Up
FB-PB.115.3	AKIRIN1	0.335152	0.00799201	Up
FB-PB.4712.1	TNKS	0.333035	0.0114885	Up
FB-PB.1890.3	JPT2	0.329318	0.0112388	Up
FB-PB.3884.4	PALLD	0.315715	0.002997	Up
FB-PB.1307.4	HSP90B1	0.312833	0.002997	Up
FB-PB.792.3	SEC23IP	0.311253	0.0224775	Up
FB-PB.3108.3	DDX27	0.30677	0.044955	Up
FB-PB.816.4	RIC8A	0.306208	0.023976	Up
FB-PB.4857.1	TSPYL5	0.301049	0.014985	Up
FB-PB.3080.10	RPN2	0.300307	0.0224775	Up
FB-PB.3307.2	FBLN2	0.298393	0.001998	Up
FB-PB.1648.2	ENTPD5	0.29757	0.0194805	Up
FB-PB.4643.3	TNPO3	0.296101	0.0367133	Up
FB-PB.906.3	CREB3L1	0.295073	0.0134865	Up
FB-PB.4418.2	TMEM181	0.292809	0.0187313	Up
FB-PB.5246.2	MID1	0.292162	0.0224775	Up
FB-PB.319.2	PDE4DIP	0.290413	0.011988	Up
FB-PB.1868.4	ANPEP	0.287931	0.0124875	Up
FB-PB.421.2	XPR1	0.282552	0.0204795	Up
FB-PB.4296.3	PGM3	0.278334	0.0172328	Up
FB-PB.1039.1	ZBTB16	0.27677	0.0217283	Up
FB-PB.1496.1	ABCC4	0.275725	0.024975	Up
FB-PB.4756.1	DPYSL2	0.273249	0.001998	Up
FB-PB.986.3	RAB6A	0.272479	0.013986	Up
FB-PB.427.3	RNASEL	0.265059	0.0457043	Up
FB-PB.2736.2	ETAA1	0.262559	0.0274725	Up
FB-PB.737.1	PI4K2A	0.262282	0.0344655	Up
FB-PB.728.2	ALDH18A1	0.262188	0.0174825	Up
FB-PB.2717.3	PNPT1	0.261744	0.0457043	Up
FB-PB.4035.3	RGMB	0.257478	0.0284715	Up
FB-PB.4789.1	RNF170	0.257228	0.047952	Up
FB-PB.999.2	PRSS23	0.249692	0.00799201	Up
FB-PB.2031.1	CMTR2	0.248332	0.044955	Up
FB-PB.4237.2	C6orf89	0.245441	0.017982	Up
FB-PB.5378.2	MMGT1	0.245172	0.015984	Up
FB-PB.1238.2	IRAK3	0.244269	0.0224775	Up
FB-PB.2976.3	SERPINE2	0.243608	0.047952	Up
FB-PB.5118.2	GLE1	0.242299	0.036963	Up
FB-PB.4129.1	TCERG1	0.239223	0.0224775	Up
FB-PB.2833.3	DARS1	0.236411	0.036963	Up
FB-PB.1176.2	TMBIM6	0.236223	0.02997	Up
FB-PB.1100.1	C1R	0.233146	0.001998	Up
FB-PB.685.1	ZNF503	0.227792	0.015984	Up
FB-PB.2676.2	SRSF7	0.225408	0.0154845	Up
FB-PB.3536.1	AMOTL2	0.2241	0.00649351	Up
FB-PB.2053.1	USP10	0.222768	0.0322178	Up
FB-PB.353.1	ARHGEF2	0.218352	0.0434565	Up
FB-PB.1894.1	TRAF7	0.216282	0.0364635	Up
FB-PB.1919.1	SNN	0.211645	0.0404595	Up
FB-PB.3369.1	SEC22C	0.211458	0.042957	Up
FB-PB.3259.1	RANGAP1	0.207505	0.021978	Up
FB-PB.188.1	GNG12	0.207189	0.046953	Up
FB-PB.165.1	JUN	0.204863	0.000999001	Up
FB-PB.5017.2	S1PR3	0.202766	0.0204795	Up
FB-PB.2076.2	TSR1	0.201845	0.0374625	Up
FB-PB.4799.1	LYPLA1	0.20085	0.032967	Up
FB-PB.1251.4	CNOT2	0.199501	0.0427073	Up
FB-PB.3033.2	MAVS	0.191771	0.033966	Up
FB-PB.3677.2	WFS1	0.19078	0.02997	Up
FB-PB.2947.2	FASTKD2	0.190498	0.0374625	Up
FB-PB.178.2	LEPROT	0.189061	0.00799201	Up
FB-PB.5023.1	BICD2	0.18893	0.032967	Up
FB-PB.3341.2	AZI2	0.188374	0.035964	Up
FB-PB.3195.1	CRKL	0.187517	0.0354645	Up
FB-PB.2133.1	USP22	0.184943	0.027972	Up
FB-PB.1607.5	TMEM260	0.183495	0.0454545	Up
FB-PB.2535.7	ACTN4	0.183232	0.033966	Up
FB-PB.4788.2	MCM4	0.182341	0.0464535	Up
FB-PB.3302.1	VGLL4	0.181812	0.031968	Up
FB-PB.330.5	MCL1	0.179933	0.041958	Up
FB-PB.2027.1	AARS1	0.179564	0.036963	Up
FB-PB.2476.2	SYDE1	0.179181	0.0434565	Up
FB-PB.4577.2	SAMD9	0.177919	0.037962	Up
FB-PB.2295.1	TIMP2	0.175298	0.027972	Up
FB-PB.577.1	DHTKD1	0.173529	0.048951	Up
FB-PB.1104.1	SLC2A3	0.173506	0.0494505	Up
FB-PB.3255.3	ST13	0.172815	0.0307193	Up
FB-PB.412.2	RALGPS2	0.171658	0.041958	Up
FB-PB.28.2	CLSTN1	0.170941	0.0472028	Up
FB-PB.2716.2	VRK2	0.170324	0.0499501	Up
FB-PB.4336.3	CD164	0.168898	0.0164835	Up
FB-PB.3428.2	DCP1A	0.167822	0.0374625	Up
FB-PB.503.1	TP53BP2	0.16615	0.0354645	Up
FB-PB.1562.2	SNX6	0.164083	0.0384615	Up
FB-PB.3593.2	NMD3	0.164032	0.035964	Up
FB-PB.3494.1	LRRC58	0.162417	0.0394605	Up
FB-PB.1913.2	EMP2	0.159868	0.024975	Up
FB-PB.1634.1	ZFP36L1	0.158849	0.021978	Up
FB-PB.4428.1	THBS2	0.158616	0.012987	Up
FB-PB.2763.1	MAT2A	0.157988	0.0154845	Up
FB-PB.5309.1	KIF4A	0.157978	0.0404595	Up
FB-PB.4847.1	PDP1	0.157811	0.043956	Up
FB-PB.148.2	EPS15	0.155482	0.0484515	Up
FB-PB.5252.1	SYAP1	0.152609	0.0464535	Up
FB-PB.2276.2	CDC42EP4	0.150782	0.047952	Up
FB-PB.5132.1	C9orf78	0.149045	0.0374625	Up
FB-PB.2441.1	TRIP10	0.148228	0.0224775	Up
FB-PB.1425.4	HSPH1	0.147873	0.041958	Up
FB-PB.2669.1	CYP1B1	0.147538	0.044955	Up
FB-PB.1700.1	HSP90AA1	0.146395	0.0134865	Up
FB-PB.2185.1	CAVIN1	0.144862	0.026973	Up
FB-PB.3400.1	QRICH1	0.142427	0.047952	Up
FB-PB.4355.1	TSPYL1	0.142268	0.041958	Up
FB-PB.672.1	P4HA1	0.141969	0.0484515	Up
FB-PB.2457.2	ILF3	0.137471	0.0334665	Up
FB-PB.567.1	NET1	0.134421	0.0414585	Up
FB-PB.3335.2	RPL15	0.129571	0.023976	Up
FB-PB.681.3	AP3M1	0.129485	0.0474525	Up
FB-PB.774.2	PDCD4	0.128408	0.0434565	Up
FB-PB.3496.2	FSTL1	0.126981	0.037962	Up
FB-PB.3803.2	UBE2D3	0.126092	0.044955	Up
FB-PB.4872.1	KLF10	0.122839	0.0434565	Up
FB-PB.1347.2	PLBD2	0.11228	0.032967	Up
FB-PB.4962.1	B4GALT1	0.107919	0.041958	Up
FB-PB.3765.2	PRKG2	0.100543	0.034965	Up
FB-PB.870.1	LDHA	0.100398	0.0374625	Up
FB-PB.2152.1	ZNF207	0.0985568	0.0444555	Up
FB-PB.1727.6	THBS1	0.0862389	0.033966	Up
FB-PB.1727.2	THBS1	0.0754535	0.033966	Up
FB-PB.5238.1	MT-ND5	0.0659125	0.028971	Up
FB-PB.5238.2	MT-ND5	-0.0659125	0.028971	Down
FB-PB.1607.3	TMEM260	-0.0724934	0.0454545	Down
FB-PB.3496.1	FSTL1	-0.0879136	0.041958	Down
FB-PB.2152.2	ZNF207	-0.0985568	0.0444555	Down
FB-PB.870.2	LDHA	-0.100398	0.0374625	Down
FB-PB.3765.1	PRKG2	-0.100543	0.034965	Down
FB-PB.4962.2	B4GALT1	-0.107919	0.041958	Down
FB-PB.1607.2	TMEM260	-0.111002	0.0454545	Down
FB-PB.1347.1	PLBD2	-0.11228	0.032967	Down
FB-PB.4872.3	KLF10	-0.122839	0.0434565	Down
FB-PB.774.1	PDCD4	-0.128408	0.0434565	Down
FB-PB.681.2	AP3M1	-0.129485	0.0474525	Down
FB-PB.3335.1	RPL15	-0.129571	0.023976	Down
FB-PB.567.2	NET1	-0.134421	0.0414585	Down
FB-PB.2457.3	ILF3	-0.137471	0.0334665	Down
FB-PB.1425.5	HSPH1	-0.14159	0.041958	Down
FB-PB.672.2	P4HA1	-0.141969	0.0484515	Down
FB-PB.4355.2	TSPYL1	-0.142268	0.041958	Down
FB-PB.3400.2	QRICH1	-0.142427	0.047952	Down
FB-PB.2185.4	CAVIN1	-0.144862	0.026973	Down
FB-PB.1700.2	HSP90AA1	-0.146395	0.0134865	Down
FB-PB.2669.2	CYP1B1	-0.147538	0.044955	Down
FB-PB.2441.2	TRIP10	-0.148228	0.0224775	Down
FB-PB.5132.2	C9orf78	-0.149045	0.0374625	Down
FB-PB.2276.1	CDC42EP4	-0.150782	0.047952	Down
FB-PB.5252.2	SYAP1	-0.152609	0.0464535	Down
FB-PB.148.1	EPS15	-0.155482	0.0484515	Down
FB-PB.5088.3	GSN	-0.155493	0.02997	Down
FB-PB.4847.2	PDP1	-0.157811	0.043956	Down
FB-PB.5309.2	KIF4A	-0.157978	0.0404595	Down
FB-PB.2763.2	MAT2A	-0.157988	0.0154845	Down
FB-PB.4428.2	THBS2	-0.158616	0.012987	Down
FB-PB.1913.1	EMP2	-0.159868	0.024975	Down
FB-PB.3494.2	LRRC58	-0.162417	0.0394605	Down
FB-PB.3593.1	NMD3	-0.164032	0.035964	Down
FB-PB.1562.1	SNX6	-0.164083	0.0384615	Down
FB-PB.503.2	TP53BP2	-0.16615	0.0354645	Down
FB-PB.3428.1	DCP1A	-0.167822	0.0374625	Down
FB-PB.2716.1	VRK2	-0.170324	0.0499501	Down
FB-PB.412.1	RALGPS2	-0.171658	0.041958	Down
FB-PB.577.2	DHTKD1	-0.173529	0.048951	Down
FB-PB.4577.1	SAMD9	-0.177919	0.037962	Down
FB-PB.2476.1	SYDE1	-0.179181	0.0434565	Down
FB-PB.4035.2	RGMB	-0.179386	0.0472028	Down
FB-PB.2027.2	AARS1	-0.179564	0.036963	Down
FB-PB.3302.2	VGLL4	-0.181812	0.031968	Down
FB-PB.2133.2	USP22	-0.184943	0.027972	Down
FB-PB.906.2	CREB3L1	-0.186447	0.0404595	Down
FB-PB.3195.2	CRKL	-0.187517	0.0354645	Down
FB-PB.3803.1	UBE2D3	-0.187714	0.031968	Down
FB-PB.3341.1	AZI2	-0.188374	0.035964	Down
FB-PB.5023.2	BICD2	-0.18893	0.032967	Down
FB-PB.1727.1	THBS1	-0.190485	0.00599401	Down
FB-PB.2947.3	FASTKD2	-0.190498	0.0374625	Down
FB-PB.3677.1	WFS1	-0.19078	0.02997	Down
FB-PB.2976.6	SERPINE2	-0.191309	0.0494505	Down
FB-PB.3033.1	MAVS	-0.191771	0.033966	Down
FB-PB.4963.3	ACO1	-0.192975	0.046953	Down
FB-PB.3255.2	ST13	-0.195249	0.0307193	Down
FB-PB.1634.4	ZFP36L1	-0.199135	0.017982	Down
FB-PB.3604.3	FNDC3B	-0.200429	0.044955	Down
FB-PB.4799.2	LYPLA1	-0.20085	0.032967	Down
FB-PB.2076.1	TSR1	-0.201845	0.0374625	Down
FB-PB.2833.1	DARS1	-0.202023	0.036963	Down
FB-PB.5017.1	S1PR3	-0.202766	0.0204795	Down
FB-PB.165.2	JUN	-0.204863	0.000999001	Down
FB-PB.4788.1	MCM4	-0.20711	0.0464535	Down
FB-PB.3259.2	RANGAP1	-0.207505	0.021978	Down
FB-PB.3369.2	SEC22C	-0.211458	0.042957	Down
FB-PB.1919.2	SNN	-0.211645	0.0404595	Down
FB-PB.188.3	GNG12	-0.21567	0.046953	Down
FB-PB.1894.2	TRAF7	-0.216282	0.0364635	Down
FB-PB.1251.2	CNOT2	-0.222494	0.0427073	Down
FB-PB.3536.2	AMOTL2	-0.2241	0.00649351	Down
FB-PB.2676.1	SRSF7	-0.225408	0.0154845	Down
FB-PB.685.2	ZNF503	-0.227792	0.015984	Down
FB-PB.5009.1	UBQLN1	-0.229069	0.041958	Down
FB-PB.1100.2	C1R	-0.233146	0.001998	Down
FB-PB.28.1	CLSTN1	-0.233605	0.035964	Down
FB-PB.4789.2	RNF170	-0.234361	0.047952	Down
FB-PB.2053.2	USP10	-0.238734	0.0322178	Down
FB-PB.792.2	SEC23IP	-0.238964	0.0232268	Down
FB-PB.4129.2	TCERG1	-0.239223	0.0224775	Down
FB-PB.5118.1	GLE1	-0.242299	0.036963	Down
FB-PB.1238.1	IRAK3	-0.244269	0.0224775	Down
FB-PB.5378.1	MMGT1	-0.245172	0.015984	Down
FB-PB.4237.1	C6orf89	-0.245441	0.017982	Down
FB-PB.2221.4	UBE2Z	-0.246819	0.0494505	Down
FB-PB.178.3	LEPR	-0.247847	0.00599401	Down
FB-PB.986.2	RAB6A	-0.247921	0.013986	Down
FB-PB.999.1	PRSS23	-0.249692	0.00799201	Down
FB-PB.4418.1	TMEM181	-0.250059	0.0187313	Down
FB-PB.427.1	RNASEL	-0.257568	0.0457043	Down
FB-PB.4336.2	CD164	-0.259433	0.002997	Down
FB-PB.4497.1	HERPUD2	-0.26081	0.017982	Down
FB-PB.2717.1	PNPT1	-0.261745	0.0457043	Down
FB-PB.728.1	ALDH18A1	-0.262188	0.0174825	Down
FB-PB.737.2	PI4K2A	-0.262282	0.0344655	Down
FB-PB.2736.1	ETAA1	-0.262559	0.0274725	Down
FB-PB.1307.1	HSP90B1	-0.263035	0.002997	Down
FB-PB.4756.2	DPYSL2	-0.273249	0.001998	Down
FB-PB.1020.4	BIRC2	-0.273705	0.0127373	Down
FB-PB.1496.2	ABCC4	-0.275725	0.024975	Down
FB-PB.1039.3	ZBTB16	-0.281681	0.0217283	Down
FB-PB.421.1	XPR1	-0.282552	0.0204795	Down
FB-PB.1131.5	BCAT1	-0.285333	0.0237263	Down
FB-PB.4296.1	PGM3	-0.286756	0.0172328	Down
FB-PB.319.3	PDE4DIP	-0.287227	0.011988	Down
FB-PB.1868.3	ANPEP	-0.287931	0.0124875	Down
FB-PB.5246.1	MID1	-0.292162	0.0224775	Down
FB-PB.816.1	RIC8A	-0.292267	0.023976	Down
FB-PB.4643.1	TNPO3	-0.296101	0.0367133	Down
FB-PB.1648.1	ENTPD5	-0.29757	0.0194805	Down
FB-PB.3307.1	FBLN2	-0.298393	0.001998	Down
FB-PB.4857.2	TSPYL5	-0.301049	0.014985	Down
FB-PB.4979.5	RECK	-0.306918	0.032967	Down
FB-PB.3884.1	PALLD	-0.315676	0.002997	Down
FB-PB.4712.3	TNKS	-0.333035	0.0114885	Down
FB-PB.115.1	AKIRIN1	-0.335152	0.00799201	Down
FB-PB.1890.1	JPT2	-0.338047	0.0112388	Down
FB-PB.1217.1	SLC16A7	-0.338209	0.012987	Down
FB-PB.415.1	TOR1AIP1	-0.348532	0.003996	Down
FB-PB.2031.3	CMTR2	-0.356392	0.0344655	Down
FB-PB.1909.4	GLYR1	-0.358632	0.01998	Down
FB-PB.90.10	PTP4A2	-0.363247	0.0164835	Down
FB-PB.400.1	KIFAP3	-0.370937	0.003996	Down
FB-PB.1529.2	CHAMP1	-0.40534	0.00899101	Down
FB-PB.1684.1	GOLGA5	-0.426398	0.000999001	Down
FB-PB.752.1	LZTS2	-0.456313	0.00549451	Down
FB-PB.2431.2	DPP9	-0.486651	0.00599401	Down
FB-PB.133.1	KIF2C	-0.502835	0.00599401	Down
FB-PB.2721.3	XPO1	-0.512622	0	Down
FB-PB.1717.2	ARHGAP11A	-0.663912	0.000999001	Down

## Sheet: Table S5.2
Table S5.2 Significant alternative splicing events detected in fibroblasts.
seqname	gene_id	GeneName	AlternativeS	event_id	ΔPSI = WF - SF	P.val	Sig	alternative_transcripts	total_transcripts
chr11	FB-PB.895	CD44	SE	FB-PB.895;SE:chr11:35190065-35211246:35211449-35214852:+	0.0969563	0.0464535	Up	FB-PB.895.1	FB-PB.895.2,FB-PB.895.1
chr20	FB-PB.3121	GNAS	SE	FB-PB.3121;SE:chr20:58895684-58898941:58898985-58903531:+	0.101227	0.040959	Up	FB-PB.3121.2	FB-PB.3121.15,FB-PB.3121.18,FB-PB.3121.17,FB-PB.3121.2,FB-PB.3121.12,FB-PB.3121.1,FB-PB.3121.19
chr20	FB-PB.3121	GNAS	SE	FB-PB.3121;SE:chr20:58895684-58898941:58898985-58903531:+	0.101227	0.040959	Up	FB-PB.3121.1	FB-PB.3121.15,FB-PB.3121.18,FB-PB.3121.17,FB-PB.3121.2,FB-PB.3121.12,FB-PB.3121.1,FB-PB.3121.19
chr20	FB-PB.3121	GNAS	SE	FB-PB.3121;SE:chr20:58895684-58898941:58898985-58903531:+	0.101227	0.040959	Up	FB-PB.3121.12	FB-PB.3121.15,FB-PB.3121.18,FB-PB.3121.17,FB-PB.3121.2,FB-PB.3121.12,FB-PB.3121.1,FB-PB.3121.19
chr20	FB-PB.3121	GNAS	SE	FB-PB.3121;SE:chr20:58895684-58898941:58898985-58903531:+	0.101227	0.040959	Up	FB-PB.3121.15	FB-PB.3121.15,FB-PB.3121.18,FB-PB.3121.17,FB-PB.3121.2,FB-PB.3121.12,FB-PB.3121.1,FB-PB.3121.19
chr20	FB-PB.3121	GNAS	SE	FB-PB.3121;SE:chr20:58895684-58898941:58898985-58903531:+	0.101227	0.040959	Up	FB-PB.3121.19	FB-PB.3121.15,FB-PB.3121.18,FB-PB.3121.17,FB-PB.3121.2,FB-PB.3121.12,FB-PB.3121.1,FB-PB.3121.19
chr20	FB-PB.3121	GNAS	SE	FB-PB.3121;SE:chr20:58895684-58898941:58898985-58903531:+	0.101227	0.040959	Up	FB-PB.3121.18	FB-PB.3121.15,FB-PB.3121.18,FB-PB.3121.17,FB-PB.3121.2,FB-PB.3121.12,FB-PB.3121.1,FB-PB.3121.19
chr2	FB-PB.2954	FN1	SE	FB-PB.2954;SE:chr2:215372015-215372109:215372300-215373322:-	0.106951	0.0430819	Up	FB-PB.2954.10	FB-PB.2954.123,FB-PB.2954.92,FB-PB.2954.67,FB-PB.2954.60,FB-PB.2954.117,FB-PB.2954.150,FB-PB.2954.43,FB-PB.2954.39,FB-PB.2954.11,FB-PB.2954.5,FB-PB.2954.79,FB-PB.2954.22,FB-PB.2954.88,FB-PB.2954.29,FB-PB.2954.94,FB-PB.2954.17,FB-PB.2954.161,FB-PB.2954.62,FB-PB.2954.151,FB-PB.2954.128,FB-PB.2954.26,FB-PB.2954.81,FB-PB.2954.140,FB-PB.2954.64,FB-PB.2954.10,FB-PB.2954.19,FB-PB.2954.160,FB-PB.2954.84,…
chr2	FB-PB.2954	FN1	SE	FB-PB.2954;SE:chr2:215372015-215372109:215372300-215373322:-	0.106951	0.0430819	Up	FB-PB.2954.11	FB-PB.2954.123,FB-PB.2954.92,FB-PB.2954.67,FB-PB.2954.60,FB-PB.2954.117,FB-PB.2954.150,FB-PB.2954.43,FB-PB.2954.39,FB-PB.2954.11,FB-PB.2954.5,FB-PB.2954.79,FB-PB.2954.22,FB-PB.2954.88,FB-PB.2954.29,FB-PB.2954.94,FB-PB.2954.17,FB-PB.2954.161,FB-PB.2954.62,FB-PB.2954.151,FB-PB.2954.128,FB-PB.2954.26,FB-PB.2954.81,FB-PB.2954.140,FB-PB.2954.64,FB-PB.2954.10,FB-PB.2954.19,FB-PB.2954.160,FB-PB.2954.84,…
chr2	FB-PB.2954	FN1	SE	FB-PB.2954;SE:chr2:215372015-215372109:215372300-215373322:-	0.106951	0.0430819	Up	FB-PB.2954.64	FB-PB.2954.123,FB-PB.2954.92,FB-PB.2954.67,FB-PB.2954.60,FB-PB.2954.117,FB-PB.2954.150,FB-PB.2954.43,FB-PB.2954.39,FB-PB.2954.11,FB-PB.2954.5,FB-PB.2954.79,FB-PB.2954.22,FB-PB.2954.88,FB-PB.2954.29,FB-PB.2954.94,FB-PB.2954.17,FB-PB.2954.161,FB-PB.2954.62,FB-PB.2954.151,FB-PB.2954.128,FB-PB.2954.26,FB-PB.2954.81,FB-PB.2954.140,FB-PB.2954.64,FB-PB.2954.10,FB-PB.2954.19,FB-PB.2954.160,FB-PB.2954.84,…
chr2	FB-PB.2954	FN1	SE	FB-PB.2954;SE:chr2:215372015-215372109:215372300-215373322:-	0.106951	0.0430819	Up	FB-PB.2954.62	FB-PB.2954.123,FB-PB.2954.92,FB-PB.2954.67,FB-PB.2954.60,FB-PB.2954.117,FB-PB.2954.150,FB-PB.2954.43,FB-PB.2954.39,FB-PB.2954.11,FB-PB.2954.5,FB-PB.2954.79,FB-PB.2954.22,FB-PB.2954.88,FB-PB.2954.29,FB-PB.2954.94,FB-PB.2954.17,FB-PB.2954.161,FB-PB.2954.62,FB-PB.2954.151,FB-PB.2954.128,FB-PB.2954.26,FB-PB.2954.81,FB-PB.2954.140,FB-PB.2954.64,FB-PB.2954.10,FB-PB.2954.19,FB-PB.2954.160,FB-PB.2954.84,…
chr2	FB-PB.2954	FN1	SE	FB-PB.2954;SE:chr2:215372015-215372109:215372300-215373322:-	0.106951	0.0430819	Up	FB-PB.2954.57	FB-PB.2954.123,FB-PB.2954.92,FB-PB.2954.67,FB-PB.2954.60,FB-PB.2954.117,FB-PB.2954.150,FB-PB.2954.43,FB-PB.2954.39,FB-PB.2954.11,FB-PB.2954.5,FB-PB.2954.79,FB-PB.2954.22,FB-PB.2954.88,FB-PB.2954.29,FB-PB.2954.94,FB-PB.2954.17,FB-PB.2954.161,FB-PB.2954.62,FB-PB.2954.151,FB-PB.2954.128,FB-PB.2954.26,FB-PB.2954.81,FB-PB.2954.140,FB-PB.2954.64,FB-PB.2954.10,FB-PB.2954.19,FB-PB.2954.160,FB-PB.2954.84,…
chr2	FB-PB.2954	FN1	SE	FB-PB.2954;SE:chr2:215372015-215372109:215372300-215373322:-	0.106951	0.0430819	Up	FB-PB.2954.14	FB-PB.2954.123,FB-PB.2954.92,FB-PB.2954.67,FB-PB.2954.60,FB-PB.2954.117,FB-PB.2954.150,FB-PB.2954.43,FB-PB.2954.39,FB-PB.2954.11,FB-PB.2954.5,FB-PB.2954.79,FB-PB.2954.22,FB-PB.2954.88,FB-PB.2954.29,FB-PB.2954.94,FB-PB.2954.17,FB-PB.2954.161,FB-PB.2954.62,FB-PB.2954.151,FB-PB.2954.128,FB-PB.2954.26,FB-PB.2954.81,FB-PB.2954.140,FB-PB.2954.64,FB-PB.2954.10,FB-PB.2954.19,FB-PB.2954.160,FB-PB.2954.84,…
chr2	FB-PB.2954	FN1	SE	FB-PB.2954;SE:chr2:215372015-215372109:215372300-215373322:-	0.106951	0.0430819	Up	FB-PB.2954.19	FB-PB.2954.123,FB-PB.2954.92,FB-PB.2954.67,FB-PB.2954.60,FB-PB.2954.117,FB-PB.2954.150,FB-PB.2954.43,FB-PB.2954.39,FB-PB.2954.11,FB-PB.2954.5,FB-PB.2954.79,FB-PB.2954.22,FB-PB.2954.88,FB-PB.2954.29,FB-PB.2954.94,FB-PB.2954.17,FB-PB.2954.161,FB-PB.2954.62,FB-PB.2954.151,FB-PB.2954.128,FB-PB.2954.26,FB-PB.2954.81,FB-PB.2954.140,FB-PB.2954.64,FB-PB.2954.10,FB-PB.2954.19,FB-PB.2954.160,FB-PB.2954.84,…
chr2	FB-PB.2954	FN1	SE	FB-PB.2954;SE:chr2:215372015-215372109:215372300-215373322:-	0.106951	0.0430819	Up	FB-PB.2954.33	FB-PB.2954.123,FB-PB.2954.92,FB-PB.2954.67,FB-PB.2954.60,FB-PB.2954.117,FB-PB.2954.150,FB-PB.2954.43,FB-PB.2954.39,FB-PB.2954.11,FB-PB.2954.5,FB-PB.2954.79,FB-PB.2954.22,FB-PB.2954.88,FB-PB.2954.29,FB-PB.2954.94,FB-PB.2954.17,FB-PB.2954.161,FB-PB.2954.62,FB-PB.2954.151,FB-PB.2954.128,FB-PB.2954.26,FB-PB.2954.81,FB-PB.2954.140,FB-PB.2954.64,FB-PB.2954.10,FB-PB.2954.19,FB-PB.2954.160,FB-PB.2954.84,…
chr2	FB-PB.2954	FN1	SE	FB-PB.2954;SE:chr2:215372015-215372109:215372300-215373322:-	0.106951	0.0430819	Up	FB-PB.2954.37	FB-PB.2954.123,FB-PB.2954.92,FB-PB.2954.67,FB-PB.2954.60,FB-PB.2954.117,FB-PB.2954.150,FB-PB.2954.43,FB-PB.2954.39,FB-PB.2954.11,FB-PB.2954.5,FB-PB.2954.79,FB-PB.2954.22,FB-PB.2954.88,FB-PB.2954.29,FB-PB.2954.94,FB-PB.2954.17,FB-PB.2954.161,FB-PB.2954.62,FB-PB.2954.151,FB-PB.2954.128,FB-PB.2954.26,FB-PB.2954.81,FB-PB.2954.140,FB-PB.2954.64,FB-PB.2954.10,FB-PB.2954.19,FB-PB.2954.160,FB-PB.2954.84,…
chr2	FB-PB.2954	FN1	SE	FB-PB.2954;SE:chr2:215372015-215372109:215372300-215373322:-	0.106951	0.0430819	Up	FB-PB.2954.81	FB-PB.2954.123,FB-PB.2954.92,FB-PB.2954.67,FB-PB.2954.60,FB-PB.2954.117,FB-PB.2954.150,FB-PB.2954.43,FB-PB.2954.39,FB-PB.2954.11,FB-PB.2954.5,FB-PB.2954.79,FB-PB.2954.22,FB-PB.2954.88,FB-PB.2954.29,FB-PB.2954.94,FB-PB.2954.17,FB-PB.2954.161,FB-PB.2954.62,FB-PB.2954.151,FB-PB.2954.128,FB-PB.2954.26,FB-PB.2954.81,FB-PB.2954.140,FB-PB.2954.64,FB-PB.2954.10,FB-PB.2954.19,FB-PB.2954.160,FB-PB.2954.84,…
chr2	FB-PB.2954	FN1	SE	FB-PB.2954;SE:chr2:215372015-215372109:215372300-215373322:-	0.106951	0.0430819	Up	FB-PB.2954.82	FB-PB.2954.123,FB-PB.2954.92,FB-PB.2954.67,FB-PB.2954.60,FB-PB.2954.117,FB-PB.2954.150,FB-PB.2954.43,FB-PB.2954.39,FB-PB.2954.11,FB-PB.2954.5,FB-PB.2954.79,FB-PB.2954.22,FB-PB.2954.88,FB-PB.2954.29,FB-PB.2954.94,FB-PB.2954.17,FB-PB.2954.161,FB-PB.2954.62,FB-PB.2954.151,FB-PB.2954.128,FB-PB.2954.26,FB-PB.2954.81,FB-PB.2954.140,FB-PB.2954.64,FB-PB.2954.10,FB-PB.2954.19,FB-PB.2954.160,FB-PB.2954.84,…
chr2	FB-PB.2954	FN1	SE	FB-PB.2954;SE:chr2:215372015-215372109:215372300-215373322:-	0.106951	0.0430819	Up	FB-PB.2954.123	FB-PB.2954.123,FB-PB.2954.92,FB-PB.2954.67,FB-PB.2954.60,FB-PB.2954.117,FB-PB.2954.150,FB-PB.2954.43,FB-PB.2954.39,FB-PB.2954.11,FB-PB.2954.5,FB-PB.2954.79,FB-PB.2954.22,FB-PB.2954.88,FB-PB.2954.29,FB-PB.2954.94,FB-PB.2954.17,FB-PB.2954.161,FB-PB.2954.62,FB-PB.2954.151,FB-PB.2954.128,FB-PB.2954.26,FB-PB.2954.81,FB-PB.2954.140,FB-PB.2954.64,FB-PB.2954.10,FB-PB.2954.19,FB-PB.2954.160,FB-PB.2954.84,…
chr2	FB-PB.2954	FN1	SE	FB-PB.2954;SE:chr2:215372015-215372109:215372300-215373322:-	0.106951	0.0430819	Up	FB-PB.2954.117	FB-PB.2954.123,FB-PB.2954.92,FB-PB.2954.67,FB-PB.2954.60,FB-PB.2954.117,FB-PB.2954.150,FB-PB.2954.43,FB-PB.2954.39,FB-PB.2954.11,FB-PB.2954.5,FB-PB.2954.79,FB-PB.2954.22,FB-PB.2954.88,FB-PB.2954.29,FB-PB.2954.94,FB-PB.2954.17,FB-PB.2954.161,FB-PB.2954.62,FB-PB.2954.151,FB-PB.2954.128,FB-PB.2954.26,FB-PB.2954.81,FB-PB.2954.140,FB-PB.2954.64,FB-PB.2954.10,FB-PB.2954.19,FB-PB.2954.160,FB-PB.2954.84,…
chr2	FB-PB.2954	FN1	SE	FB-PB.2954;SE:chr2:215372015-215372109:215372300-215373322:-	0.106951	0.0430819	Up	FB-PB.2954.128	FB-PB.2954.123,FB-PB.2954.92,FB-PB.2954.67,FB-PB.2954.60,FB-PB.2954.117,FB-PB.2954.150,FB-PB.2954.43,FB-PB.2954.39,FB-PB.2954.11,FB-PB.2954.5,FB-PB.2954.79,FB-PB.2954.22,FB-PB.2954.88,FB-PB.2954.29,FB-PB.2954.94,FB-PB.2954.17,FB-PB.2954.161,FB-PB.2954.62,FB-PB.2954.151,FB-PB.2954.128,FB-PB.2954.26,FB-PB.2954.81,FB-PB.2954.140,FB-PB.2954.64,FB-PB.2954.10,FB-PB.2954.19,FB-PB.2954.160,FB-PB.2954.84,…
chr2	FB-PB.2954	FN1	SE	FB-PB.2954;SE:chr2:215372015-215372109:215372300-215373322:-	0.106951	0.0430819	Up	FB-PB.2954.94	FB-PB.2954.123,FB-PB.2954.92,FB-PB.2954.67,FB-PB.2954.60,FB-PB.2954.117,FB-PB.2954.150,FB-PB.2954.43,FB-PB.2954.39,FB-PB.2954.11,FB-PB.2954.5,FB-PB.2954.79,FB-PB.2954.22,FB-PB.2954.88,FB-PB.2954.29,FB-PB.2954.94,FB-PB.2954.17,FB-PB.2954.161,FB-PB.2954.62,FB-PB.2954.151,FB-PB.2954.128,FB-PB.2954.26,FB-PB.2954.81,FB-PB.2954.140,FB-PB.2954.64,FB-PB.2954.10,FB-PB.2954.19,FB-PB.2954.160,FB-PB.2954.84,…
chr2	FB-PB.2954	FN1	SE	FB-PB.2954;SE:chr2:215372015-215372109:215372300-215373322:-	0.106951	0.0430819	Up	FB-PB.2954.92	FB-PB.2954.123,FB-PB.2954.92,FB-PB.2954.67,FB-PB.2954.60,FB-PB.2954.117,FB-PB.2954.150,FB-PB.2954.43,FB-PB.2954.39,FB-PB.2954.11,FB-PB.2954.5,FB-PB.2954.79,FB-PB.2954.22,FB-PB.2954.88,FB-PB.2954.29,FB-PB.2954.94,FB-PB.2954.17,FB-PB.2954.161,FB-PB.2954.62,FB-PB.2954.151,FB-PB.2954.128,FB-PB.2954.26,FB-PB.2954.81,FB-PB.2954.140,FB-PB.2954.64,FB-PB.2954.10,FB-PB.2954.19,FB-PB.2954.160,FB-PB.2954.84,…
chr2	FB-PB.2954	FN1	SE	FB-PB.2954;SE:chr2:215372015-215372109:215372300-215373322:-	0.106951	0.0430819	Up	FB-PB.2954.160	FB-PB.2954.123,FB-PB.2954.92,FB-PB.2954.67,FB-PB.2954.60,FB-PB.2954.117,FB-PB.2954.150,FB-PB.2954.43,FB-PB.2954.39,FB-PB.2954.11,FB-PB.2954.5,FB-PB.2954.79,FB-PB.2954.22,FB-PB.2954.88,FB-PB.2954.29,FB-PB.2954.94,FB-PB.2954.17,FB-PB.2954.161,FB-PB.2954.62,FB-PB.2954.151,FB-PB.2954.128,FB-PB.2954.26,FB-PB.2954.81,FB-PB.2954.140,FB-PB.2954.64,FB-PB.2954.10,FB-PB.2954.19,FB-PB.2954.160,FB-PB.2954.84,…
chr2	FB-PB.2954	FN1	SE	FB-PB.2954;SE:chr2:215372015-215372109:215372300-215373322:-	0.106951	0.0430819	Up	FB-PB.2954.151	FB-PB.2954.123,FB-PB.2954.92,FB-PB.2954.67,FB-PB.2954.60,FB-PB.2954.117,FB-PB.2954.150,FB-PB.2954.43,FB-PB.2954.39,FB-PB.2954.11,FB-PB.2954.5,FB-PB.2954.79,FB-PB.2954.22,FB-PB.2954.88,FB-PB.2954.29,FB-PB.2954.94,FB-PB.2954.17,FB-PB.2954.161,FB-PB.2954.62,FB-PB.2954.151,FB-PB.2954.128,FB-PB.2954.26,FB-PB.2954.81,FB-PB.2954.140,FB-PB.2954.64,FB-PB.2954.10,FB-PB.2954.19,FB-PB.2954.160,FB-PB.2954.84,…
chr3	FB-PB.3335	RPL15	A5	FB-PB.3335;A5:chr3:23917295-23917850:23917173-23917850:+	0.129571	0.046953	Up	FB-PB.3335.2	FB-PB.3335.2,FB-PB.3335.1
chr19	FB-PB.2457	ILF3	A3	FB-PB.2457;A3:chr19:10682704-10683125:10682704-10683137:+	0.137471	0.030969	Up	FB-PB.2457.2	FB-PB.2457.3,FB-PB.2457.2
chr2	FB-PB.2954	FN1	SE	FB-PB.2954;SE:chr2:215391814-215392931:215393203-215394528:-	0.139501	0.0224775	Up	FB-PB.2954.28	FB-PB.2954.47,FB-PB.2954.123,FB-PB.2954.167,FB-PB.2954.1,FB-PB.2954.39,FB-PB.2954.126,FB-PB.2954.119,FB-PB.2954.88,FB-PB.2954.29,FB-PB.2954.109,FB-PB.2954.2,FB-PB.2954.116,FB-PB.2954.17,FB-PB.2954.129,FB-PB.2954.105,FB-PB.2954.120,FB-PB.2954.114,FB-PB.2954.107,FB-PB.2954.31,FB-PB.2954.153,FB-PB.2954.84,FB-PB.2954.154,FB-PB.2954.82,FB-PB.2954.13,FB-PB.2954.33,FB-PB.2954.118,FB-PB.2954.61,FB-PB.295…
chr2	FB-PB.2954	FN1	SE	FB-PB.2954;SE:chr2:215391814-215392931:215393203-215394528:-	0.139501	0.0224775	Up	FB-PB.2954.27	FB-PB.2954.47,FB-PB.2954.123,FB-PB.2954.167,FB-PB.2954.1,FB-PB.2954.39,FB-PB.2954.126,FB-PB.2954.119,FB-PB.2954.88,FB-PB.2954.29,FB-PB.2954.109,FB-PB.2954.2,FB-PB.2954.116,FB-PB.2954.17,FB-PB.2954.129,FB-PB.2954.105,FB-PB.2954.120,FB-PB.2954.114,FB-PB.2954.107,FB-PB.2954.31,FB-PB.2954.153,FB-PB.2954.84,FB-PB.2954.154,FB-PB.2954.82,FB-PB.2954.13,FB-PB.2954.33,FB-PB.2954.118,FB-PB.2954.61,FB-PB.295…
chr2	FB-PB.2954	FN1	SE	FB-PB.2954;SE:chr2:215391814-215392931:215393203-215394528:-	0.139501	0.0224775	Up	FB-PB.2954.59	FB-PB.2954.47,FB-PB.2954.123,FB-PB.2954.167,FB-PB.2954.1,FB-PB.2954.39,FB-PB.2954.126,FB-PB.2954.119,FB-PB.2954.88,FB-PB.2954.29,FB-PB.2954.109,FB-PB.2954.2,FB-PB.2954.116,FB-PB.2954.17,FB-PB.2954.129,FB-PB.2954.105,FB-PB.2954.120,FB-PB.2954.114,FB-PB.2954.107,FB-PB.2954.31,FB-PB.2954.153,FB-PB.2954.84,FB-PB.2954.154,FB-PB.2954.82,FB-PB.2954.13,FB-PB.2954.33,FB-PB.2954.118,FB-PB.2954.61,FB-PB.295…
chr2	FB-PB.2954	FN1	SE	FB-PB.2954;SE:chr2:215391814-215392931:215393203-215394528:-	0.139501	0.0224775	Up	FB-PB.2954.23	FB-PB.2954.47,FB-PB.2954.123,FB-PB.2954.167,FB-PB.2954.1,FB-PB.2954.39,FB-PB.2954.126,FB-PB.2954.119,FB-PB.2954.88,FB-PB.2954.29,FB-PB.2954.109,FB-PB.2954.2,FB-PB.2954.116,FB-PB.2954.17,FB-PB.2954.129,FB-PB.2954.105,FB-PB.2954.120,FB-PB.2954.114,FB-PB.2954.107,FB-PB.2954.31,FB-PB.2954.153,FB-PB.2954.84,FB-PB.2954.154,FB-PB.2954.82,FB-PB.2954.13,FB-PB.2954.33,FB-PB.2954.118,FB-PB.2954.61,FB-PB.295…
chr2	FB-PB.2954	FN1	SE	FB-PB.2954;SE:chr2:215391814-215392931:215393203-215394528:-	0.139501	0.0224775	Up	FB-PB.2954.25	FB-PB.2954.47,FB-PB.2954.123,FB-PB.2954.167,FB-PB.2954.1,FB-PB.2954.39,FB-PB.2954.126,FB-PB.2954.119,FB-PB.2954.88,FB-PB.2954.29,FB-PB.2954.109,FB-PB.2954.2,FB-PB.2954.116,FB-PB.2954.17,FB-PB.2954.129,FB-PB.2954.105,FB-PB.2954.120,FB-PB.2954.114,FB-PB.2954.107,FB-PB.2954.31,FB-PB.2954.153,FB-PB.2954.84,FB-PB.2954.154,FB-PB.2954.82,FB-PB.2954.13,FB-PB.2954.33,FB-PB.2954.118,FB-PB.2954.61,FB-PB.295…
chr2	FB-PB.2954	FN1	SE	FB-PB.2954;SE:chr2:215391814-215392931:215393203-215394528:-	0.139501	0.0224775	Up	FB-PB.2954.44	FB-PB.2954.47,FB-PB.2954.123,FB-PB.2954.167,FB-PB.2954.1,FB-PB.2954.39,FB-PB.2954.126,FB-PB.2954.119,FB-PB.2954.88,FB-PB.2954.29,FB-PB.2954.109,FB-PB.2954.2,FB-PB.2954.116,FB-PB.2954.17,FB-PB.2954.129,FB-PB.2954.105,FB-PB.2954.120,FB-PB.2954.114,FB-PB.2954.107,FB-PB.2954.31,FB-PB.2954.153,FB-PB.2954.84,FB-PB.2954.154,FB-PB.2954.82,FB-PB.2954.13,FB-PB.2954.33,FB-PB.2954.118,FB-PB.2954.61,FB-PB.295…
chr2	FB-PB.2954	FN1	SE	FB-PB.2954;SE:chr2:215391814-215392931:215393203-215394528:-	0.139501	0.0224775	Up	FB-PB.2954.30	FB-PB.2954.47,FB-PB.2954.123,FB-PB.2954.167,FB-PB.2954.1,FB-PB.2954.39,FB-PB.2954.126,FB-PB.2954.119,FB-PB.2954.88,FB-PB.2954.29,FB-PB.2954.109,FB-PB.2954.2,FB-PB.2954.116,FB-PB.2954.17,FB-PB.2954.129,FB-PB.2954.105,FB-PB.2954.120,FB-PB.2954.114,FB-PB.2954.107,FB-PB.2954.31,FB-PB.2954.153,FB-PB.2954.84,FB-PB.2954.154,FB-PB.2954.82,FB-PB.2954.13,FB-PB.2954.33,FB-PB.2954.118,FB-PB.2954.61,FB-PB.295…
chr2	FB-PB.2954	FN1	SE	FB-PB.2954;SE:chr2:215391814-215392931:215393203-215394528:-	0.139501	0.0224775	Up	FB-PB.2954.33	FB-PB.2954.47,FB-PB.2954.123,FB-PB.2954.167,FB-PB.2954.1,FB-PB.2954.39,FB-PB.2954.126,FB-PB.2954.119,FB-PB.2954.88,FB-PB.2954.29,FB-PB.2954.109,FB-PB.2954.2,FB-PB.2954.116,FB-PB.2954.17,FB-PB.2954.129,FB-PB.2954.105,FB-PB.2954.120,FB-PB.2954.114,FB-PB.2954.107,FB-PB.2954.31,FB-PB.2954.153,FB-PB.2954.84,FB-PB.2954.154,FB-PB.2954.82,FB-PB.2954.13,FB-PB.2954.33,FB-PB.2954.118,FB-PB.2954.61,FB-PB.295…
chr2	FB-PB.2954	FN1	SE	FB-PB.2954;SE:chr2:215391814-215392931:215393203-215394528:-	0.139501	0.0224775	Up	FB-PB.2954.35	FB-PB.2954.47,FB-PB.2954.123,FB-PB.2954.167,FB-PB.2954.1,FB-PB.2954.39,FB-PB.2954.126,FB-PB.2954.119,FB-PB.2954.88,FB-PB.2954.29,FB-PB.2954.109,FB-PB.2954.2,FB-PB.2954.116,FB-PB.2954.17,FB-PB.2954.129,FB-PB.2954.105,FB-PB.2954.120,FB-PB.2954.114,FB-PB.2954.107,FB-PB.2954.31,FB-PB.2954.153,FB-PB.2954.84,FB-PB.2954.154,FB-PB.2954.82,FB-PB.2954.13,FB-PB.2954.33,FB-PB.2954.118,FB-PB.2954.61,FB-PB.295…
chr2	FB-PB.2954	FN1	SE	FB-PB.2954;SE:chr2:215391814-215392931:215393203-215394528:-	0.139501	0.0224775	Up	FB-PB.2954.37	FB-PB.2954.47,FB-PB.2954.123,FB-PB.2954.167,FB-PB.2954.1,FB-PB.2954.39,FB-PB.2954.126,FB-PB.2954.119,FB-PB.2954.88,FB-PB.2954.29,FB-PB.2954.109,FB-PB.2954.2,FB-PB.2954.116,FB-PB.2954.17,FB-PB.2954.129,FB-PB.2954.105,FB-PB.2954.120,FB-PB.2954.114,FB-PB.2954.107,FB-PB.2954.31,FB-PB.2954.153,FB-PB.2954.84,FB-PB.2954.154,FB-PB.2954.82,FB-PB.2954.13,FB-PB.2954.33,FB-PB.2954.118,FB-PB.2954.61,FB-PB.295…
chr2	FB-PB.2954	FN1	SE	FB-PB.2954;SE:chr2:215391814-215392931:215393203-215394528:-	0.139501	0.0224775	Up	FB-PB.2954.80	FB-PB.2954.47,FB-PB.2954.123,FB-PB.2954.167,FB-PB.2954.1,FB-PB.2954.39,FB-PB.2954.126,FB-PB.2954.119,FB-PB.2954.88,FB-PB.2954.29,FB-PB.2954.109,FB-PB.2954.2,FB-PB.2954.116,FB-PB.2954.17,FB-PB.2954.129,FB-PB.2954.105,FB-PB.2954.120,FB-PB.2954.114,FB-PB.2954.107,FB-PB.2954.31,FB-PB.2954.153,FB-PB.2954.84,FB-PB.2954.154,FB-PB.2954.82,FB-PB.2954.13,FB-PB.2954.33,FB-PB.2954.118,FB-PB.2954.61,FB-PB.295…
chr2	FB-PB.2954	FN1	SE	FB-PB.2954;SE:chr2:215391814-215392931:215393203-215394528:-	0.139501	0.0224775	Up	FB-PB.2954.83	FB-PB.2954.47,FB-PB.2954.123,FB-PB.2954.167,FB-PB.2954.1,FB-PB.2954.39,FB-PB.2954.126,FB-PB.2954.119,FB-PB.2954.88,FB-PB.2954.29,FB-PB.2954.109,FB-PB.2954.2,FB-PB.2954.116,FB-PB.2954.17,FB-PB.2954.129,FB-PB.2954.105,FB-PB.2954.120,FB-PB.2954.114,FB-PB.2954.107,FB-PB.2954.31,FB-PB.2954.153,FB-PB.2954.84,FB-PB.2954.154,FB-PB.2954.82,FB-PB.2954.13,FB-PB.2954.33,FB-PB.2954.118,FB-PB.2954.61,FB-PB.295…
chr2	FB-PB.2954	FN1	SE	FB-PB.2954;SE:chr2:215391814-215392931:215393203-215394528:-	0.139501	0.0224775	Up	FB-PB.2954.82	FB-PB.2954.47,FB-PB.2954.123,FB-PB.2954.167,FB-PB.2954.1,FB-PB.2954.39,FB-PB.2954.126,FB-PB.2954.119,FB-PB.2954.88,FB-PB.2954.29,FB-PB.2954.109,FB-PB.2954.2,FB-PB.2954.116,FB-PB.2954.17,FB-PB.2954.129,FB-PB.2954.105,FB-PB.2954.120,FB-PB.2954.114,FB-PB.2954.107,FB-PB.2954.31,FB-PB.2954.153,FB-PB.2954.84,FB-PB.2954.154,FB-PB.2954.82,FB-PB.2954.13,FB-PB.2954.33,FB-PB.2954.118,FB-PB.2954.61,FB-PB.295…
chr2	FB-PB.2954	FN1	SE	FB-PB.2954;SE:chr2:215391814-215392931:215393203-215394528:-	0.139501	0.0224775	Up	FB-PB.2954.121	FB-PB.2954.47,FB-PB.2954.123,FB-PB.2954.167,FB-PB.2954.1,FB-PB.2954.39,FB-PB.2954.126,FB-PB.2954.119,FB-PB.2954.88,FB-PB.2954.29,FB-PB.2954.109,FB-PB.2954.2,FB-PB.2954.116,FB-PB.2954.17,FB-PB.2954.129,FB-PB.2954.105,FB-PB.2954.120,FB-PB.2954.114,FB-PB.2954.107,FB-PB.2954.31,FB-PB.2954.153,FB-PB.2954.84,FB-PB.2954.154,FB-PB.2954.82,FB-PB.2954.13,FB-PB.2954.33,FB-PB.2954.118,FB-PB.2954.61,FB-PB.295…
chr2	FB-PB.2954	FN1	SE	FB-PB.2954;SE:chr2:215391814-215392931:215393203-215394528:-	0.139501	0.0224775	Up	FB-PB.2954.117	FB-PB.2954.47,FB-PB.2954.123,FB-PB.2954.167,FB-PB.2954.1,FB-PB.2954.39,FB-PB.2954.126,FB-PB.2954.119,FB-PB.2954.88,FB-PB.2954.29,FB-PB.2954.109,FB-PB.2954.2,FB-PB.2954.116,FB-PB.2954.17,FB-PB.2954.129,FB-PB.2954.105,FB-PB.2954.120,FB-PB.2954.114,FB-PB.2954.107,FB-PB.2954.31,FB-PB.2954.153,FB-PB.2954.84,FB-PB.2954.154,FB-PB.2954.82,FB-PB.2954.13,FB-PB.2954.33,FB-PB.2954.118,FB-PB.2954.61,FB-PB.295…
chr2	FB-PB.2954	FN1	SE	FB-PB.2954;SE:chr2:215391814-215392931:215393203-215394528:-	0.139501	0.0224775	Up	FB-PB.2954.101	FB-PB.2954.47,FB-PB.2954.123,FB-PB.2954.167,FB-PB.2954.1,FB-PB.2954.39,FB-PB.2954.126,FB-PB.2954.119,FB-PB.2954.88,FB-PB.2954.29,FB-PB.2954.109,FB-PB.2954.2,FB-PB.2954.116,FB-PB.2954.17,FB-PB.2954.129,FB-PB.2954.105,FB-PB.2954.120,FB-PB.2954.114,FB-PB.2954.107,FB-PB.2954.31,FB-PB.2954.153,FB-PB.2954.84,FB-PB.2954.154,FB-PB.2954.82,FB-PB.2954.13,FB-PB.2954.33,FB-PB.2954.118,FB-PB.2954.61,FB-PB.295…
chr2	FB-PB.2954	FN1	SE	FB-PB.2954;SE:chr2:215391814-215392931:215393203-215394528:-	0.139501	0.0224775	Up	FB-PB.2954.107	FB-PB.2954.47,FB-PB.2954.123,FB-PB.2954.167,FB-PB.2954.1,FB-PB.2954.39,FB-PB.2954.126,FB-PB.2954.119,FB-PB.2954.88,FB-PB.2954.29,FB-PB.2954.109,FB-PB.2954.2,FB-PB.2954.116,FB-PB.2954.17,FB-PB.2954.129,FB-PB.2954.105,FB-PB.2954.120,FB-PB.2954.114,FB-PB.2954.107,FB-PB.2954.31,FB-PB.2954.153,FB-PB.2954.84,FB-PB.2954.154,FB-PB.2954.82,FB-PB.2954.13,FB-PB.2954.33,FB-PB.2954.118,FB-PB.2954.61,FB-PB.295…
chr2	FB-PB.2954	FN1	SE	FB-PB.2954;SE:chr2:215391814-215392931:215393203-215394528:-	0.139501	0.0224775	Up	FB-PB.2954.106	FB-PB.2954.47,FB-PB.2954.123,FB-PB.2954.167,FB-PB.2954.1,FB-PB.2954.39,FB-PB.2954.126,FB-PB.2954.119,FB-PB.2954.88,FB-PB.2954.29,FB-PB.2954.109,FB-PB.2954.2,FB-PB.2954.116,FB-PB.2954.17,FB-PB.2954.129,FB-PB.2954.105,FB-PB.2954.120,FB-PB.2954.114,FB-PB.2954.107,FB-PB.2954.31,FB-PB.2954.153,FB-PB.2954.84,FB-PB.2954.154,FB-PB.2954.82,FB-PB.2954.13,FB-PB.2954.33,FB-PB.2954.118,FB-PB.2954.61,FB-PB.295…
chr2	FB-PB.2954	FN1	SE	FB-PB.2954;SE:chr2:215391814-215392931:215393203-215394528:-	0.139501	0.0224775	Up	FB-PB.2954.103	FB-PB.2954.47,FB-PB.2954.123,FB-PB.2954.167,FB-PB.2954.1,FB-PB.2954.39,FB-PB.2954.126,FB-PB.2954.119,FB-PB.2954.88,FB-PB.2954.29,FB-PB.2954.109,FB-PB.2954.2,FB-PB.2954.116,FB-PB.2954.17,FB-PB.2954.129,FB-PB.2954.105,FB-PB.2954.120,FB-PB.2954.114,FB-PB.2954.107,FB-PB.2954.31,FB-PB.2954.153,FB-PB.2954.84,FB-PB.2954.154,FB-PB.2954.82,FB-PB.2954.13,FB-PB.2954.33,FB-PB.2954.118,FB-PB.2954.61,FB-PB.295…
chr2	FB-PB.2954	FN1	SE	FB-PB.2954;SE:chr2:215391814-215392931:215393203-215394528:-	0.139501	0.0224775	Up	FB-PB.2954.102	FB-PB.2954.47,FB-PB.2954.123,FB-PB.2954.167,FB-PB.2954.1,FB-PB.2954.39,FB-PB.2954.126,FB-PB.2954.119,FB-PB.2954.88,FB-PB.2954.29,FB-PB.2954.109,FB-PB.2954.2,FB-PB.2954.116,FB-PB.2954.17,FB-PB.2954.129,FB-PB.2954.105,FB-PB.2954.120,FB-PB.2954.114,FB-PB.2954.107,FB-PB.2954.31,FB-PB.2954.153,FB-PB.2954.84,FB-PB.2954.154,FB-PB.2954.82,FB-PB.2954.13,FB-PB.2954.33,FB-PB.2954.118,FB-PB.2954.61,FB-PB.295…
chr2	FB-PB.2954	FN1	SE	FB-PB.2954;SE:chr2:215391814-215392931:215393203-215394528:-	0.139501	0.0224775	Up	FB-PB.2954.85	FB-PB.2954.47,FB-PB.2954.123,FB-PB.2954.167,FB-PB.2954.1,FB-PB.2954.39,FB-PB.2954.126,FB-PB.2954.119,FB-PB.2954.88,FB-PB.2954.29,FB-PB.2954.109,FB-PB.2954.2,FB-PB.2954.116,FB-PB.2954.17,FB-PB.2954.129,FB-PB.2954.105,FB-PB.2954.120,FB-PB.2954.114,FB-PB.2954.107,FB-PB.2954.31,FB-PB.2954.153,FB-PB.2954.84,FB-PB.2954.154,FB-PB.2954.82,FB-PB.2954.13,FB-PB.2954.33,FB-PB.2954.118,FB-PB.2954.61,FB-PB.295…
chr2	FB-PB.2954	FN1	SE	FB-PB.2954;SE:chr2:215391814-215392931:215393203-215394528:-	0.139501	0.0224775	Up	FB-PB.2954.13	FB-PB.2954.47,FB-PB.2954.123,FB-PB.2954.167,FB-PB.2954.1,FB-PB.2954.39,FB-PB.2954.126,FB-PB.2954.119,FB-PB.2954.88,FB-PB.2954.29,FB-PB.2954.109,FB-PB.2954.2,FB-PB.2954.116,FB-PB.2954.17,FB-PB.2954.129,FB-PB.2954.105,FB-PB.2954.120,FB-PB.2954.114,FB-PB.2954.107,FB-PB.2954.31,FB-PB.2954.153,FB-PB.2954.84,FB-PB.2954.154,FB-PB.2954.82,FB-PB.2954.13,FB-PB.2954.33,FB-PB.2954.118,FB-PB.2954.61,FB-PB.295…
chr2	FB-PB.2954	FN1	SE	FB-PB.2954;SE:chr2:215391814-215392931:215393203-215394528:-	0.139501	0.0224775	Up	FB-PB.2954.31	FB-PB.2954.47,FB-PB.2954.123,FB-PB.2954.167,FB-PB.2954.1,FB-PB.2954.39,FB-PB.2954.126,FB-PB.2954.119,FB-PB.2954.88,FB-PB.2954.29,FB-PB.2954.109,FB-PB.2954.2,FB-PB.2954.116,FB-PB.2954.17,FB-PB.2954.129,FB-PB.2954.105,FB-PB.2954.120,FB-PB.2954.114,FB-PB.2954.107,FB-PB.2954.31,FB-PB.2954.153,FB-PB.2954.84,FB-PB.2954.154,FB-PB.2954.82,FB-PB.2954.13,FB-PB.2954.33,FB-PB.2954.118,FB-PB.2954.61,FB-PB.295…
chr2	FB-PB.2954	FN1	SE	FB-PB.2954;SE:chr2:215391814-215392931:215393203-215394528:-	0.139501	0.0224775	Up	FB-PB.2954.88	FB-PB.2954.47,FB-PB.2954.123,FB-PB.2954.167,FB-PB.2954.1,FB-PB.2954.39,FB-PB.2954.126,FB-PB.2954.119,FB-PB.2954.88,FB-PB.2954.29,FB-PB.2954.109,FB-PB.2954.2,FB-PB.2954.116,FB-PB.2954.17,FB-PB.2954.129,FB-PB.2954.105,FB-PB.2954.120,FB-PB.2954.114,FB-PB.2954.107,FB-PB.2954.31,FB-PB.2954.153,FB-PB.2954.84,FB-PB.2954.154,FB-PB.2954.82,FB-PB.2954.13,FB-PB.2954.33,FB-PB.2954.118,FB-PB.2954.61,FB-PB.295…
chr2	FB-PB.2954	FN1	SE	FB-PB.2954;SE:chr2:215372015-215372109:215372375-215373322:-	0.151867	0.0224775	Up	FB-PB.2954.2	FB-PB.2954.47,FB-PB.2954.164,FB-PB.2954.63,FB-PB.2954.69,FB-PB.2954.171,FB-PB.2954.39,FB-PB.2954.126,FB-PB.2954.79,FB-PB.2954.119,FB-PB.2954.88,FB-PB.2954.29,FB-PB.2954.109,FB-PB.2954.2,FB-PB.2954.116,FB-PB.2954.17,FB-PB.2954.129,FB-PB.2954.105,FB-PB.2954.120,FB-PB.2954.114,FB-PB.2954.107,FB-PB.2954.153,FB-PB.2954.138,FB-PB.2954.140,FB-PB.2954.84,FB-PB.2954.154,FB-PB.2954.149,FB-PB.2954.13,FB-PB.…
chr2	FB-PB.2954	FN1	SE	FB-PB.2954;SE:chr2:215372015-215372109:215372375-215373322:-	0.151867	0.0224775	Up	FB-PB.2954.3	FB-PB.2954.47,FB-PB.2954.164,FB-PB.2954.63,FB-PB.2954.69,FB-PB.2954.171,FB-PB.2954.39,FB-PB.2954.126,FB-PB.2954.79,FB-PB.2954.119,FB-PB.2954.88,FB-PB.2954.29,FB-PB.2954.109,FB-PB.2954.2,FB-PB.2954.116,FB-PB.2954.17,FB-PB.2954.129,FB-PB.2954.105,FB-PB.2954.120,FB-PB.2954.114,FB-PB.2954.107,FB-PB.2954.153,FB-PB.2954.138,FB-PB.2954.140,FB-PB.2954.84,FB-PB.2954.154,FB-PB.2954.149,FB-PB.2954.13,FB-PB.…
chr2	FB-PB.2954	FN1	SE	FB-PB.2954;SE:chr2:215372015-215372109:215372375-215373322:-	0.151867	0.0224775	Up	FB-PB.2954.4	FB-PB.2954.47,FB-PB.2954.164,FB-PB.2954.63,FB-PB.2954.69,FB-PB.2954.171,FB-PB.2954.39,FB-PB.2954.126,FB-PB.2954.79,FB-PB.2954.119,FB-PB.2954.88,FB-PB.2954.29,FB-PB.2954.109,FB-PB.2954.2,FB-PB.2954.116,FB-PB.2954.17,FB-PB.2954.129,FB-PB.2954.105,FB-PB.2954.120,FB-PB.2954.114,FB-PB.2954.107,FB-PB.2954.153,FB-PB.2954.138,FB-PB.2954.140,FB-PB.2954.84,FB-PB.2954.154,FB-PB.2954.149,FB-PB.2954.13,FB-PB.…
chr2	FB-PB.2954	FN1	SE	FB-PB.2954;SE:chr2:215372015-215372109:215372375-215373322:-	0.151867	0.0224775	Up	FB-PB.2954.6	FB-PB.2954.47,FB-PB.2954.164,FB-PB.2954.63,FB-PB.2954.69,FB-PB.2954.171,FB-PB.2954.39,FB-PB.2954.126,FB-PB.2954.79,FB-PB.2954.119,FB-PB.2954.88,FB-PB.2954.29,FB-PB.2954.109,FB-PB.2954.2,FB-PB.2954.116,FB-PB.2954.17,FB-PB.2954.129,FB-PB.2954.105,FB-PB.2954.120,FB-PB.2954.114,FB-PB.2954.107,FB-PB.2954.153,FB-PB.2954.138,FB-PB.2954.140,FB-PB.2954.84,FB-PB.2954.154,FB-PB.2954.149,FB-PB.2954.13,FB-PB.…
chr2	FB-PB.2954	FN1	SE	FB-PB.2954;SE:chr2:215372015-215372109:215372375-215373322:-	0.151867	0.0224775	Up	FB-PB.2954.7	FB-PB.2954.47,FB-PB.2954.164,FB-PB.2954.63,FB-PB.2954.69,FB-PB.2954.171,FB-PB.2954.39,FB-PB.2954.126,FB-PB.2954.79,FB-PB.2954.119,FB-PB.2954.88,FB-PB.2954.29,FB-PB.2954.109,FB-PB.2954.2,FB-PB.2954.116,FB-PB.2954.17,FB-PB.2954.129,FB-PB.2954.105,FB-PB.2954.120,FB-PB.2954.114,FB-PB.2954.107,FB-PB.2954.153,FB-PB.2954.138,FB-PB.2954.140,FB-PB.2954.84,FB-PB.2954.154,FB-PB.2954.149,FB-PB.2954.13,FB-PB.…
chr2	FB-PB.2954	FN1	SE	FB-PB.2954;SE:chr2:215372015-215372109:215372375-215373322:-	0.151867	0.0224775	Up	FB-PB.2954.77	FB-PB.2954.47,FB-PB.2954.164,FB-PB.2954.63,FB-PB.2954.69,FB-PB.2954.171,FB-PB.2954.39,FB-PB.2954.126,FB-PB.2954.79,FB-PB.2954.119,FB-PB.2954.88,FB-PB.2954.29,FB-PB.2954.109,FB-PB.2954.2,FB-PB.2954.116,FB-PB.2954.17,FB-PB.2954.129,FB-PB.2954.105,FB-PB.2954.120,FB-PB.2954.114,FB-PB.2954.107,FB-PB.2954.153,FB-PB.2954.138,FB-PB.2954.140,FB-PB.2954.84,FB-PB.2954.154,FB-PB.2954.149,FB-PB.2954.13,FB-PB.…
chr2	FB-PB.2954	FN1	SE	FB-PB.2954;SE:chr2:215372015-215372109:215372375-215373322:-	0.151867	0.0224775	Up	FB-PB.2954.74	FB-PB.2954.47,FB-PB.2954.164,FB-PB.2954.63,FB-PB.2954.69,FB-PB.2954.171,FB-PB.2954.39,FB-PB.2954.126,FB-PB.2954.79,FB-PB.2954.119,FB-PB.2954.88,FB-PB.2954.29,FB-PB.2954.109,FB-PB.2954.2,FB-PB.2954.116,FB-PB.2954.17,FB-PB.2954.129,FB-PB.2954.105,FB-PB.2954.120,FB-PB.2954.114,FB-PB.2954.107,FB-PB.2954.153,FB-PB.2954.138,FB-PB.2954.140,FB-PB.2954.84,FB-PB.2954.154,FB-PB.2954.149,FB-PB.2954.13,FB-PB.…
chr2	FB-PB.2954	FN1	SE	FB-PB.2954;SE:chr2:215372015-215372109:215372375-215373322:-	0.151867	0.0224775	Up	FB-PB.2954.72	FB-PB.2954.47,FB-PB.2954.164,FB-PB.2954.63,FB-PB.2954.69,FB-PB.2954.171,FB-PB.2954.39,FB-PB.2954.126,FB-PB.2954.79,FB-PB.2954.119,FB-PB.2954.88,FB-PB.2954.29,FB-PB.2954.109,FB-PB.2954.2,FB-PB.2954.116,FB-PB.2954.17,FB-PB.2954.129,FB-PB.2954.105,FB-PB.2954.120,FB-PB.2954.114,FB-PB.2954.107,FB-PB.2954.153,FB-PB.2954.138,FB-PB.2954.140,FB-PB.2954.84,FB-PB.2954.154,FB-PB.2954.149,FB-PB.2954.13,FB-PB.…
chr2	FB-PB.2954	FN1	SE	FB-PB.2954;SE:chr2:215372015-215372109:215372375-215373322:-	0.151867	0.0224775	Up	FB-PB.2954.68	FB-PB.2954.47,FB-PB.2954.164,FB-PB.2954.63,FB-PB.2954.69,FB-PB.2954.171,FB-PB.2954.39,FB-PB.2954.126,FB-PB.2954.79,FB-PB.2954.119,FB-PB.2954.88,FB-PB.2954.29,FB-PB.2954.109,FB-PB.2954.2,FB-PB.2954.116,FB-PB.2954.17,FB-PB.2954.129,FB-PB.2954.105,FB-PB.2954.120,FB-PB.2954.114,FB-PB.2954.107,FB-PB.2954.153,FB-PB.2954.138,FB-PB.2954.140,FB-PB.2954.84,FB-PB.2954.154,FB-PB.2954.149,FB-PB.2954.13,FB-PB.…
chr2	FB-PB.2954	FN1	SE	FB-PB.2954;SE:chr2:215372015-215372109:215372375-215373322:-	0.151867	0.0224775	Up	FB-PB.2954.63	FB-PB.2954.47,FB-PB.2954.164,FB-PB.2954.63,FB-PB.2954.69,FB-PB.2954.171,FB-PB.2954.39,FB-PB.2954.126,FB-PB.2954.79,FB-PB.2954.119,FB-PB.2954.88,FB-PB.2954.29,FB-PB.2954.109,FB-PB.2954.2,FB-PB.2954.116,FB-PB.2954.17,FB-PB.2954.129,FB-PB.2954.105,FB-PB.2954.120,FB-PB.2954.114,FB-PB.2954.107,FB-PB.2954.153,FB-PB.2954.138,FB-PB.2954.140,FB-PB.2954.84,FB-PB.2954.154,FB-PB.2954.149,FB-PB.2954.13,FB-PB.…
chr2	FB-PB.2954	FN1	SE	FB-PB.2954;SE:chr2:215372015-215372109:215372375-215373322:-	0.151867	0.0224775	Up	FB-PB.2954.71	FB-PB.2954.47,FB-PB.2954.164,FB-PB.2954.63,FB-PB.2954.69,FB-PB.2954.171,FB-PB.2954.39,FB-PB.2954.126,FB-PB.2954.79,FB-PB.2954.119,FB-PB.2954.88,FB-PB.2954.29,FB-PB.2954.109,FB-PB.2954.2,FB-PB.2954.116,FB-PB.2954.17,FB-PB.2954.129,FB-PB.2954.105,FB-PB.2954.120,FB-PB.2954.114,FB-PB.2954.107,FB-PB.2954.153,FB-PB.2954.138,FB-PB.2954.140,FB-PB.2954.84,FB-PB.2954.154,FB-PB.2954.149,FB-PB.2954.13,FB-PB.…
chr2	FB-PB.2954	FN1	SE	FB-PB.2954;SE:chr2:215372015-215372109:215372375-215373322:-	0.151867	0.0224775	Up	FB-PB.2954.65	FB-PB.2954.47,FB-PB.2954.164,FB-PB.2954.63,FB-PB.2954.69,FB-PB.2954.171,FB-PB.2954.39,FB-PB.2954.126,FB-PB.2954.79,FB-PB.2954.119,FB-PB.2954.88,FB-PB.2954.29,FB-PB.2954.109,FB-PB.2954.2,FB-PB.2954.116,FB-PB.2954.17,FB-PB.2954.129,FB-PB.2954.105,FB-PB.2954.120,FB-PB.2954.114,FB-PB.2954.107,FB-PB.2954.153,FB-PB.2954.138,FB-PB.2954.140,FB-PB.2954.84,FB-PB.2954.154,FB-PB.2954.149,FB-PB.2954.13,FB-PB.…
chr2	FB-PB.2954	FN1	SE	FB-PB.2954;SE:chr2:215372015-215372109:215372375-215373322:-	0.151867	0.0224775	Up	FB-PB.2954.69	FB-PB.2954.47,FB-PB.2954.164,FB-PB.2954.63,FB-PB.2954.69,FB-PB.2954.171,FB-PB.2954.39,FB-PB.2954.126,FB-PB.2954.79,FB-PB.2954.119,FB-PB.2954.88,FB-PB.2954.29,FB-PB.2954.109,FB-PB.2954.2,FB-PB.2954.116,FB-PB.2954.17,FB-PB.2954.129,FB-PB.2954.105,FB-PB.2954.120,FB-PB.2954.114,FB-PB.2954.107,FB-PB.2954.153,FB-PB.2954.138,FB-PB.2954.140,FB-PB.2954.84,FB-PB.2954.154,FB-PB.2954.149,FB-PB.2954.13,FB-PB.…
chr2	FB-PB.2954	FN1	SE	FB-PB.2954;SE:chr2:215372015-215372109:215372375-215373322:-	0.151867	0.0224775	Up	FB-PB.2954.55	FB-PB.2954.47,FB-PB.2954.164,FB-PB.2954.63,FB-PB.2954.69,FB-PB.2954.171,FB-PB.2954.39,FB-PB.2954.126,FB-PB.2954.79,FB-PB.2954.119,FB-PB.2954.88,FB-PB.2954.29,FB-PB.2954.109,FB-PB.2954.2,FB-PB.2954.116,FB-PB.2954.17,FB-PB.2954.129,FB-PB.2954.105,FB-PB.2954.120,FB-PB.2954.114,FB-PB.2954.107,FB-PB.2954.153,FB-PB.2954.138,FB-PB.2954.140,FB-PB.2954.84,FB-PB.2954.154,FB-PB.2954.149,FB-PB.2954.13,FB-PB.…
chr2	FB-PB.2954	FN1	SE	FB-PB.2954;SE:chr2:215372015-215372109:215372375-215373322:-	0.151867	0.0224775	Up	FB-PB.2954.56	FB-PB.2954.47,FB-PB.2954.164,FB-PB.2954.63,FB-PB.2954.69,FB-PB.2954.171,FB-PB.2954.39,FB-PB.2954.126,FB-PB.2954.79,FB-PB.2954.119,FB-PB.2954.88,FB-PB.2954.29,FB-PB.2954.109,FB-PB.2954.2,FB-PB.2954.116,FB-PB.2954.17,FB-PB.2954.129,FB-PB.2954.105,FB-PB.2954.120,FB-PB.2954.114,FB-PB.2954.107,FB-PB.2954.153,FB-PB.2954.138,FB-PB.2954.140,FB-PB.2954.84,FB-PB.2954.154,FB-PB.2954.149,FB-PB.2954.13,FB-PB.…
chr2	FB-PB.2954	FN1	SE	FB-PB.2954;SE:chr2:215372015-215372109:215372375-215373322:-	0.151867	0.0224775	Up	FB-PB.2954.28	FB-PB.2954.47,FB-PB.2954.164,FB-PB.2954.63,FB-PB.2954.69,FB-PB.2954.171,FB-PB.2954.39,FB-PB.2954.126,FB-PB.2954.79,FB-PB.2954.119,FB-PB.2954.88,FB-PB.2954.29,FB-PB.2954.109,FB-PB.2954.2,FB-PB.2954.116,FB-PB.2954.17,FB-PB.2954.129,FB-PB.2954.105,FB-PB.2954.120,FB-PB.2954.114,FB-PB.2954.107,FB-PB.2954.153,FB-PB.2954.138,FB-PB.2954.140,FB-PB.2954.84,FB-PB.2954.154,FB-PB.2954.149,FB-PB.2954.13,FB-PB.…
chr2	FB-PB.2954	FN1	SE	FB-PB.2954;SE:chr2:215372015-215372109:215372375-215373322:-	0.151867	0.0224775	Up	FB-PB.2954.50	FB-PB.2954.47,FB-PB.2954.164,FB-PB.2954.63,FB-PB.2954.69,FB-PB.2954.171,FB-PB.2954.39,FB-PB.2954.126,FB-PB.2954.79,FB-PB.2954.119,FB-PB.2954.88,FB-PB.2954.29,FB-PB.2954.109,FB-PB.2954.2,FB-PB.2954.116,FB-PB.2954.17,FB-PB.2954.129,FB-PB.2954.105,FB-PB.2954.120,FB-PB.2954.114,FB-PB.2954.107,FB-PB.2954.153,FB-PB.2954.138,FB-PB.2954.140,FB-PB.2954.84,FB-PB.2954.154,FB-PB.2954.149,FB-PB.2954.13,FB-PB.…
chr2	FB-PB.2954	FN1	SE	FB-PB.2954;SE:chr2:215372015-215372109:215372375-215373322:-	0.151867	0.0224775	Up	FB-PB.2954.58	FB-PB.2954.47,FB-PB.2954.164,FB-PB.2954.63,FB-PB.2954.69,FB-PB.2954.171,FB-PB.2954.39,FB-PB.2954.126,FB-PB.2954.79,FB-PB.2954.119,FB-PB.2954.88,FB-PB.2954.29,FB-PB.2954.109,FB-PB.2954.2,FB-PB.2954.116,FB-PB.2954.17,FB-PB.2954.129,FB-PB.2954.105,FB-PB.2954.120,FB-PB.2954.114,FB-PB.2954.107,FB-PB.2954.153,FB-PB.2954.138,FB-PB.2954.140,FB-PB.2954.84,FB-PB.2954.154,FB-PB.2954.149,FB-PB.2954.13,FB-PB.…
chr2	FB-PB.2954	FN1	SE	FB-PB.2954;SE:chr2:215372015-215372109:215372375-215373322:-	0.151867	0.0224775	Up	FB-PB.2954.53	FB-PB.2954.47,FB-PB.2954.164,FB-PB.2954.63,FB-PB.2954.69,FB-PB.2954.171,FB-PB.2954.39,FB-PB.2954.126,FB-PB.2954.79,FB-PB.2954.119,FB-PB.2954.88,FB-PB.2954.29,FB-PB.2954.109,FB-PB.2954.2,FB-PB.2954.116,FB-PB.2954.17,FB-PB.2954.129,FB-PB.2954.105,FB-PB.2954.120,FB-PB.2954.114,FB-PB.2954.107,FB-PB.2954.153,FB-PB.2954.138,FB-PB.2954.140,FB-PB.2954.84,FB-PB.2954.154,FB-PB.2954.149,FB-PB.2954.13,FB-PB.…
chr2	FB-PB.2954	FN1	SE	FB-PB.2954;SE:chr2:215372015-215372109:215372375-215373322:-	0.151867	0.0224775	Up	FB-PB.2954.27	FB-PB.2954.47,FB-PB.2954.164,FB-PB.2954.63,FB-PB.2954.69,FB-PB.2954.171,FB-PB.2954.39,FB-PB.2954.126,FB-PB.2954.79,FB-PB.2954.119,FB-PB.2954.88,FB-PB.2954.29,FB-PB.2954.109,FB-PB.2954.2,FB-PB.2954.116,FB-PB.2954.17,FB-PB.2954.129,FB-PB.2954.105,FB-PB.2954.120,FB-PB.2954.114,FB-PB.2954.107,FB-PB.2954.153,FB-PB.2954.138,FB-PB.2954.140,FB-PB.2954.84,FB-PB.2954.154,FB-PB.2954.149,FB-PB.2954.13,FB-PB.…
chr2	FB-PB.2954	FN1	SE	FB-PB.2954;SE:chr2:215372015-215372109:215372375-215373322:-	0.151867	0.0224775	Up	FB-PB.2954.59	FB-PB.2954.47,FB-PB.2954.164,FB-PB.2954.63,FB-PB.2954.69,FB-PB.2954.171,FB-PB.2954.39,FB-PB.2954.126,FB-PB.2954.79,FB-PB.2954.119,FB-PB.2954.88,FB-PB.2954.29,FB-PB.2954.109,FB-PB.2954.2,FB-PB.2954.116,FB-PB.2954.17,FB-PB.2954.129,FB-PB.2954.105,FB-PB.2954.120,FB-PB.2954.114,FB-PB.2954.107,FB-PB.2954.153,FB-PB.2954.138,FB-PB.2954.140,FB-PB.2954.84,FB-PB.2954.154,FB-PB.2954.149,FB-PB.2954.13,FB-PB.…
chr2	FB-PB.2954	FN1	SE	FB-PB.2954;SE:chr2:215372015-215372109:215372375-215373322:-	0.151867	0.0224775	Up	FB-PB.2954.52	FB-PB.2954.47,FB-PB.2954.164,FB-PB.2954.63,FB-PB.2954.69,FB-PB.2954.171,FB-PB.2954.39,FB-PB.2954.126,FB-PB.2954.79,FB-PB.2954.119,FB-PB.2954.88,FB-PB.2954.29,FB-PB.2954.109,FB-PB.2954.2,FB-PB.2954.116,FB-PB.2954.17,FB-PB.2954.129,FB-PB.2954.105,FB-PB.2954.120,FB-PB.2954.114,FB-PB.2954.107,FB-PB.2954.153,FB-PB.2954.138,FB-PB.2954.140,FB-PB.2954.84,FB-PB.2954.154,FB-PB.2954.149,FB-PB.2954.13,FB-PB.…
chr2	FB-PB.2954	FN1	SE	FB-PB.2954;SE:chr2:215372015-215372109:215372375-215373322:-	0.151867	0.0224775	Up	FB-PB.2954.23	FB-PB.2954.47,FB-PB.2954.164,FB-PB.2954.63,FB-PB.2954.69,FB-PB.2954.171,FB-PB.2954.39,FB-PB.2954.126,FB-PB.2954.79,FB-PB.2954.119,FB-PB.2954.88,FB-PB.2954.29,FB-PB.2954.109,FB-PB.2954.2,FB-PB.2954.116,FB-PB.2954.17,FB-PB.2954.129,FB-PB.2954.105,FB-PB.2954.120,FB-PB.2954.114,FB-PB.2954.107,FB-PB.2954.153,FB-PB.2954.138,FB-PB.2954.140,FB-PB.2954.84,FB-PB.2954.154,FB-PB.2954.149,FB-PB.2954.13,FB-PB.…
chr2	FB-PB.2954	FN1	SE	FB-PB.2954;SE:chr2:215372015-215372109:215372375-215373322:-	0.151867	0.0224775	Up	FB-PB.2954.20	FB-PB.2954.47,FB-PB.2954.164,FB-PB.2954.63,FB-PB.2954.69,FB-PB.2954.171,FB-PB.2954.39,FB-PB.2954.126,FB-PB.2954.79,FB-PB.2954.119,FB-PB.2954.88,FB-PB.2954.29,FB-PB.2954.109,FB-PB.2954.2,FB-PB.2954.116,FB-PB.2954.17,FB-PB.2954.129,FB-PB.2954.105,FB-PB.2954.120,FB-PB.2954.114,FB-PB.2954.107,FB-PB.2954.153,FB-PB.2954.138,FB-PB.2954.140,FB-PB.2954.84,FB-PB.2954.154,FB-PB.2954.149,FB-PB.2954.13,FB-PB.…
chr2	FB-PB.2954	FN1	SE	FB-PB.2954;SE:chr2:215372015-215372109:215372375-215373322:-	0.151867	0.0224775	Up	FB-PB.2954.25	FB-PB.2954.47,FB-PB.2954.164,FB-PB.2954.63,FB-PB.2954.69,FB-PB.2954.171,FB-PB.2954.39,FB-PB.2954.126,FB-PB.2954.79,FB-PB.2954.119,FB-PB.2954.88,FB-PB.2954.29,FB-PB.2954.109,FB-PB.2954.2,FB-PB.2954.116,FB-PB.2954.17,FB-PB.2954.129,FB-PB.2954.105,FB-PB.2954.120,FB-PB.2954.114,FB-PB.2954.107,FB-PB.2954.153,FB-PB.2954.138,FB-PB.2954.140,FB-PB.2954.84,FB-PB.2954.154,FB-PB.2954.149,FB-PB.2954.13,FB-PB.…
chr2	FB-PB.2954	FN1	SE	FB-PB.2954;SE:chr2:215372015-215372109:215372375-215373322:-	0.151867	0.0224775	Up	FB-PB.2954.21	FB-PB.2954.47,FB-PB.2954.164,FB-PB.2954.63,FB-PB.2954.69,FB-PB.2954.171,FB-PB.2954.39,FB-PB.2954.126,FB-PB.2954.79,FB-PB.2954.119,FB-PB.2954.88,FB-PB.2954.29,FB-PB.2954.109,FB-PB.2954.2,FB-PB.2954.116,FB-PB.2954.17,FB-PB.2954.129,FB-PB.2954.105,FB-PB.2954.120,FB-PB.2954.114,FB-PB.2954.107,FB-PB.2954.153,FB-PB.2954.138,FB-PB.2954.140,FB-PB.2954.84,FB-PB.2954.154,FB-PB.2954.149,FB-PB.2954.13,FB-PB.…
chr2	FB-PB.2954	FN1	SE	FB-PB.2954;SE:chr2:215372015-215372109:215372375-215373322:-	0.151867	0.0224775	Up	FB-PB.2954.44	FB-PB.2954.47,FB-PB.2954.164,FB-PB.2954.63,FB-PB.2954.69,FB-PB.2954.171,FB-PB.2954.39,FB-PB.2954.126,FB-PB.2954.79,FB-PB.2954.119,FB-PB.2954.88,FB-PB.2954.29,FB-PB.2954.109,FB-PB.2954.2,FB-PB.2954.116,FB-PB.2954.17,FB-PB.2954.129,FB-PB.2954.105,FB-PB.2954.120,FB-PB.2954.114,FB-PB.2954.107,FB-PB.2954.153,FB-PB.2954.138,FB-PB.2954.140,FB-PB.2954.84,FB-PB.2954.154,FB-PB.2954.149,FB-PB.2954.13,FB-PB.…
chr2	FB-PB.2954	FN1	SE	FB-PB.2954;SE:chr2:215372015-215372109:215372375-215373322:-	0.151867	0.0224775	Up	FB-PB.2954.24	FB-PB.2954.47,FB-PB.2954.164,FB-PB.2954.63,FB-PB.2954.69,FB-PB.2954.171,FB-PB.2954.39,FB-PB.2954.126,FB-PB.2954.79,FB-PB.2954.119,FB-PB.2954.88,FB-PB.2954.29,FB-PB.2954.109,FB-PB.2954.2,FB-PB.2954.116,FB-PB.2954.17,FB-PB.2954.129,FB-PB.2954.105,FB-PB.2954.120,FB-PB.2954.114,FB-PB.2954.107,FB-PB.2954.153,FB-PB.2954.138,FB-PB.2954.140,FB-PB.2954.84,FB-PB.2954.154,FB-PB.2954.149,FB-PB.2954.13,FB-PB.…
chr2	FB-PB.2954	FN1	SE	FB-PB.2954;SE:chr2:215372015-215372109:215372375-215373322:-	0.151867	0.0224775	Up	FB-PB.2954.42	FB-PB.2954.47,FB-PB.2954.164,FB-PB.2954.63,FB-PB.2954.69,FB-PB.2954.171,FB-PB.2954.39,FB-PB.2954.126,FB-PB.2954.79,FB-PB.2954.119,FB-PB.2954.88,FB-PB.2954.29,FB-PB.2954.109,FB-PB.2954.2,FB-PB.2954.116,FB-PB.2954.17,FB-PB.2954.129,FB-PB.2954.105,FB-PB.2954.120,FB-PB.2954.114,FB-PB.2954.107,FB-PB.2954.153,FB-PB.2954.138,FB-PB.2954.140,FB-PB.2954.84,FB-PB.2954.154,FB-PB.2954.149,FB-PB.2954.13,FB-PB.…
chr2	FB-PB.2954	FN1	SE	FB-PB.2954;SE:chr2:215372015-215372109:215372375-215373322:-	0.151867	0.0224775	Up	FB-PB.2954.47	FB-PB.2954.47,FB-PB.2954.164,FB-PB.2954.63,FB-PB.2954.69,FB-PB.2954.171,FB-PB.2954.39,FB-PB.2954.126,FB-PB.2954.79,FB-PB.2954.119,FB-PB.2954.88,FB-PB.2954.29,FB-PB.2954.109,FB-PB.2954.2,FB-PB.2954.116,FB-PB.2954.17,FB-PB.2954.129,FB-PB.2954.105,FB-PB.2954.120,FB-PB.2954.114,FB-PB.2954.107,FB-PB.2954.153,FB-PB.2954.138,FB-PB.2954.140,FB-PB.2954.84,FB-PB.2954.154,FB-PB.2954.149,FB-PB.2954.13,FB-PB.…
chr2	FB-PB.2954	FN1	SE	FB-PB.2954;SE:chr2:215372015-215372109:215372375-215373322:-	0.151867	0.0224775	Up	FB-PB.2954.48	FB-PB.2954.47,FB-PB.2954.164,FB-PB.2954.63,FB-PB.2954.69,FB-PB.2954.171,FB-PB.2954.39,FB-PB.2954.126,FB-PB.2954.79,FB-PB.2954.119,FB-PB.2954.88,FB-PB.2954.29,FB-PB.2954.109,FB-PB.2954.2,FB-PB.2954.116,FB-PB.2954.17,FB-PB.2954.129,FB-PB.2954.105,FB-PB.2954.120,FB-PB.2954.114,FB-PB.2954.107,FB-PB.2954.153,FB-PB.2954.138,FB-PB.2954.140,FB-PB.2954.84,FB-PB.2954.154,FB-PB.2954.149,FB-PB.2954.13,FB-PB.…
chr2	FB-PB.2954	FN1	SE	FB-PB.2954;SE:chr2:215372015-215372109:215372375-215373322:-	0.151867	0.0224775	Up	FB-PB.2954.45	FB-PB.2954.47,FB-PB.2954.164,FB-PB.2954.63,FB-PB.2954.69,FB-PB.2954.171,FB-PB.2954.39,FB-PB.2954.126,FB-PB.2954.79,FB-PB.2954.119,FB-PB.2954.88,FB-PB.2954.29,FB-PB.2954.109,FB-PB.2954.2,FB-PB.2954.116,FB-PB.2954.17,FB-PB.2954.129,FB-PB.2954.105,FB-PB.2954.120,FB-PB.2954.114,FB-PB.2954.107,FB-PB.2954.153,FB-PB.2954.138,FB-PB.2954.140,FB-PB.2954.84,FB-PB.2954.154,FB-PB.2954.149,FB-PB.2954.13,FB-PB.…
chr2	FB-PB.2954	FN1	SE	FB-PB.2954;SE:chr2:215372015-215372109:215372375-215373322:-	0.151867	0.0224775	Up	FB-PB.2954.40	FB-PB.2954.47,FB-PB.2954.164,FB-PB.2954.63,FB-PB.2954.69,FB-PB.2954.171,FB-PB.2954.39,FB-PB.2954.126,FB-PB.2954.79,FB-PB.2954.119,FB-PB.2954.88,FB-PB.2954.29,FB-PB.2954.109,FB-PB.2954.2,FB-PB.2954.116,FB-PB.2954.17,FB-PB.2954.129,FB-PB.2954.105,FB-PB.2954.120,FB-PB.2954.114,FB-PB.2954.107,FB-PB.2954.153,FB-PB.2954.138,FB-PB.2954.140,FB-PB.2954.84,FB-PB.2954.154,FB-PB.2954.149,FB-PB.2954.13,FB-PB.…
chr2	FB-PB.2954	FN1	SE	FB-PB.2954;SE:chr2:215372015-215372109:215372375-215373322:-	0.151867	0.0224775	Up	FB-PB.2954.38	FB-PB.2954.47,FB-PB.2954.164,FB-PB.2954.63,FB-PB.2954.69,FB-PB.2954.171,FB-PB.2954.39,FB-PB.2954.126,FB-PB.2954.79,FB-PB.2954.119,FB-PB.2954.88,FB-PB.2954.29,FB-PB.2954.109,FB-PB.2954.2,FB-PB.2954.116,FB-PB.2954.17,FB-PB.2954.129,FB-PB.2954.105,FB-PB.2954.120,FB-PB.2954.114,FB-PB.2954.107,FB-PB.2954.153,FB-PB.2954.138,FB-PB.2954.140,FB-PB.2954.84,FB-PB.2954.154,FB-PB.2954.149,FB-PB.2954.13,FB-PB.…
chr2	FB-PB.2954	FN1	SE	FB-PB.2954;SE:chr2:215372015-215372109:215372375-215373322:-	0.151867	0.0224775	Up	FB-PB.2954.30	FB-PB.2954.47,FB-PB.2954.164,FB-PB.2954.63,FB-PB.2954.69,FB-PB.2954.171,FB-PB.2954.39,FB-PB.2954.126,FB-PB.2954.79,FB-PB.2954.119,FB-PB.2954.88,FB-PB.2954.29,FB-PB.2954.109,FB-PB.2954.2,FB-PB.2954.116,FB-PB.2954.17,FB-PB.2954.129,FB-PB.2954.105,FB-PB.2954.120,FB-PB.2954.114,FB-PB.2954.107,FB-PB.2954.153,FB-PB.2954.138,FB-PB.2954.140,FB-PB.2954.84,FB-PB.2954.154,FB-PB.2954.149,FB-PB.2954.13,FB-PB.…
chr2	FB-PB.2954	FN1	SE	FB-PB.2954;SE:chr2:215372015-215372109:215372375-215373322:-	0.151867	0.0224775	Up	FB-PB.2954.80	FB-PB.2954.47,FB-PB.2954.164,FB-PB.2954.63,FB-PB.2954.69,FB-PB.2954.171,FB-PB.2954.39,FB-PB.2954.126,FB-PB.2954.79,FB-PB.2954.119,FB-PB.2954.88,FB-PB.2954.29,FB-PB.2954.109,FB-PB.2954.2,FB-PB.2954.116,FB-PB.2954.17,FB-PB.2954.129,FB-PB.2954.105,FB-PB.2954.120,FB-PB.2954.114,FB-PB.2954.107,FB-PB.2954.153,FB-PB.2954.138,FB-PB.2954.140,FB-PB.2954.84,FB-PB.2954.154,FB-PB.2954.149,FB-PB.2954.13,FB-PB.…
chr2	FB-PB.2954	FN1	SE	FB-PB.2954;SE:chr2:215372015-215372109:215372375-215373322:-	0.151867	0.0224775	Up	FB-PB.2954.83	FB-PB.2954.47,FB-PB.2954.164,FB-PB.2954.63,FB-PB.2954.69,FB-PB.2954.171,FB-PB.2954.39,FB-PB.2954.126,FB-PB.2954.79,FB-PB.2954.119,FB-PB.2954.88,FB-PB.2954.29,FB-PB.2954.109,FB-PB.2954.2,FB-PB.2954.116,FB-PB.2954.17,FB-PB.2954.129,FB-PB.2954.105,FB-PB.2954.120,FB-PB.2954.114,FB-PB.2954.107,FB-PB.2954.153,FB-PB.2954.138,FB-PB.2954.140,FB-PB.2954.84,FB-PB.2954.154,FB-PB.2954.149,FB-PB.2954.13,FB-PB.…
chr2	FB-PB.2954	FN1	SE	FB-PB.2954;SE:chr2:215372015-215372109:215372375-215373322:-	0.151867	0.0224775	Up	FB-PB.2954.149	FB-PB.2954.47,FB-PB.2954.164,FB-PB.2954.63,FB-PB.2954.69,FB-PB.2954.171,FB-PB.2954.39,FB-PB.2954.126,FB-PB.2954.79,FB-PB.2954.119,FB-PB.2954.88,FB-PB.2954.29,FB-PB.2954.109,FB-PB.2954.2,FB-PB.2954.116,FB-PB.2954.17,FB-PB.2954.129,FB-PB.2954.105,FB-PB.2954.120,FB-PB.2954.114,FB-PB.2954.107,FB-PB.2954.153,FB-PB.2954.138,FB-PB.2954.140,FB-PB.2954.84,FB-PB.2954.154,FB-PB.2954.149,FB-PB.2954.13,FB-PB.…
chr2	FB-PB.2954	FN1	SE	FB-PB.2954;SE:chr2:215372015-215372109:215372375-215373322:-	0.151867	0.0224775	Up	FB-PB.2954.146	FB-PB.2954.47,FB-PB.2954.164,FB-PB.2954.63,FB-PB.2954.69,FB-PB.2954.171,FB-PB.2954.39,FB-PB.2954.126,FB-PB.2954.79,FB-PB.2954.119,FB-PB.2954.88,FB-PB.2954.29,FB-PB.2954.109,FB-PB.2954.2,FB-PB.2954.116,FB-PB.2954.17,FB-PB.2954.129,FB-PB.2954.105,FB-PB.2954.120,FB-PB.2954.114,FB-PB.2954.107,FB-PB.2954.153,FB-PB.2954.138,FB-PB.2954.140,FB-PB.2954.84,FB-PB.2954.154,FB-PB.2954.149,FB-PB.2954.13,FB-PB.…
chr2	FB-PB.2954	FN1	SE	FB-PB.2954;SE:chr2:215372015-215372109:215372375-215373322:-	0.151867	0.0224775	Up	FB-PB.2954.148	FB-PB.2954.47,FB-PB.2954.164,FB-PB.2954.63,FB-PB.2954.69,FB-PB.2954.171,FB-PB.2954.39,FB-PB.2954.126,FB-PB.2954.79,FB-PB.2954.119,FB-PB.2954.88,FB-PB.2954.29,FB-PB.2954.109,FB-PB.2954.2,FB-PB.2954.116,FB-PB.2954.17,FB-PB.2954.129,FB-PB.2954.105,FB-PB.2954.120,FB-PB.2954.114,FB-PB.2954.107,FB-PB.2954.153,FB-PB.2954.138,FB-PB.2954.140,FB-PB.2954.84,FB-PB.2954.154,FB-PB.2954.149,FB-PB.2954.13,FB-PB.…
chr2	FB-PB.2954	FN1	SE	FB-PB.2954;SE:chr2:215372015-215372109:215372375-215373322:-	0.151867	0.0224775	Up	FB-PB.2954.143	FB-PB.2954.47,FB-PB.2954.164,FB-PB.2954.63,FB-PB.2954.69,FB-PB.2954.171,FB-PB.2954.39,FB-PB.2954.126,FB-PB.2954.79,FB-PB.2954.119,FB-PB.2954.88,FB-PB.2954.29,FB-PB.2954.109,FB-PB.2954.2,FB-PB.2954.116,FB-PB.2954.17,FB-PB.2954.129,FB-PB.2954.105,FB-PB.2954.120,FB-PB.2954.114,FB-PB.2954.107,FB-PB.2954.153,FB-PB.2954.138,FB-PB.2954.140,FB-PB.2954.84,FB-PB.2954.154,FB-PB.2954.149,FB-PB.2954.13,FB-PB.…
chr2	FB-PB.2954	FN1	SE	FB-PB.2954;SE:chr2:215372015-215372109:215372375-215373322:-	0.151867	0.0224775	Up	FB-PB.2954.147	FB-PB.2954.47,FB-PB.2954.164,FB-PB.2954.63,FB-PB.2954.69,FB-PB.2954.171,FB-PB.2954.39,FB-PB.2954.126,FB-PB.2954.79,FB-PB.2954.119,FB-PB.2954.88,FB-PB.2954.29,FB-PB.2954.109,FB-PB.2954.2,FB-PB.2954.116,FB-PB.2954.17,FB-PB.2954.129,FB-PB.2954.105,FB-PB.2954.120,FB-PB.2954.114,FB-PB.2954.107,FB-PB.2954.153,FB-PB.2954.138,FB-PB.2954.140,FB-PB.2954.84,FB-PB.2954.154,FB-PB.2954.149,FB-PB.2954.13,FB-PB.…
chr2	FB-PB.2954	FN1	SE	FB-PB.2954;SE:chr2:215372015-215372109:215372375-215373322:-	0.151867	0.0224775	Up	FB-PB.2954.141	FB-PB.2954.47,FB-PB.2954.164,FB-PB.2954.63,FB-PB.2954.69,FB-PB.2954.171,FB-PB.2954.39,FB-PB.2954.126,FB-PB.2954.79,FB-PB.2954.119,FB-PB.2954.88,FB-PB.2954.29,FB-PB.2954.109,FB-PB.2954.2,FB-PB.2954.116,FB-PB.2954.17,FB-PB.2954.129,FB-PB.2954.105,FB-PB.2954.120,FB-PB.2954.114,FB-PB.2954.107,FB-PB.2954.153,FB-PB.2954.138,FB-PB.2954.140,FB-PB.2954.84,FB-PB.2954.154,FB-PB.2954.149,FB-PB.2954.13,FB-PB.…
chr2	FB-PB.2954	FN1	SE	FB-PB.2954;SE:chr2:215372015-215372109:215372375-215373322:-	0.151867	0.0224775	Up	FB-PB.2954.139	FB-PB.2954.47,FB-PB.2954.164,FB-PB.2954.63,FB-PB.2954.69,FB-PB.2954.171,FB-PB.2954.39,FB-PB.2954.126,FB-PB.2954.79,FB-PB.2954.119,FB-PB.2954.88,FB-PB.2954.29,FB-PB.2954.109,FB-PB.2954.2,FB-PB.2954.116,FB-PB.2954.17,FB-PB.2954.129,FB-PB.2954.105,FB-PB.2954.120,FB-PB.2954.114,FB-PB.2954.107,FB-PB.2954.153,FB-PB.2954.138,FB-PB.2954.140,FB-PB.2954.84,FB-PB.2954.154,FB-PB.2954.149,FB-PB.2954.13,FB-PB.…
chr2	FB-PB.2954	FN1	SE	FB-PB.2954;SE:chr2:215372015-215372109:215372375-215373322:-	0.151867	0.0224775	Up	FB-PB.2954.145	FB-PB.2954.47,FB-PB.2954.164,FB-PB.2954.63,FB-PB.2954.69,FB-PB.2954.171,FB-PB.2954.39,FB-PB.2954.126,FB-PB.2954.79,FB-PB.2954.119,FB-PB.2954.88,FB-PB.2954.29,FB-PB.2954.109,FB-PB.2954.2,FB-PB.2954.116,FB-PB.2954.17,FB-PB.2954.129,FB-PB.2954.105,FB-PB.2954.120,FB-PB.2954.114,FB-PB.2954.107,FB-PB.2954.153,FB-PB.2954.138,FB-PB.2954.140,FB-PB.2954.84,FB-PB.2954.154,FB-PB.2954.149,FB-PB.2954.13,FB-PB.…
chr2	FB-PB.2954	FN1	SE	FB-PB.2954;SE:chr2:215372015-215372109:215372375-215373322:-	0.151867	0.0224775	Up	FB-PB.2954.135	FB-PB.2954.47,FB-PB.2954.164,FB-PB.2954.63,FB-PB.2954.69,FB-PB.2954.171,FB-PB.2954.39,FB-PB.2954.126,FB-PB.2954.79,FB-PB.2954.119,FB-PB.2954.88,FB-PB.2954.29,FB-PB.2954.109,FB-PB.2954.2,FB-PB.2954.116,FB-PB.2954.17,FB-PB.2954.129,FB-PB.2954.105,FB-PB.2954.120,FB-PB.2954.114,FB-PB.2954.107,FB-PB.2954.153,FB-PB.2954.138,FB-PB.2954.140,FB-PB.2954.84,FB-PB.2954.154,FB-PB.2954.149,FB-PB.2954.13,FB-PB.…
chr2	FB-PB.2954	FN1	SE	FB-PB.2954;SE:chr2:215372015-215372109:215372375-215373322:-	0.151867	0.0224775	Up	FB-PB.2954.137	FB-PB.2954.47,FB-PB.2954.164,FB-PB.2954.63,FB-PB.2954.69,FB-PB.2954.171,FB-PB.2954.39,FB-PB.2954.126,FB-PB.2954.79,FB-PB.2954.119,FB-PB.2954.88,FB-PB.2954.29,FB-PB.2954.109,FB-PB.2954.2,FB-PB.2954.116,FB-PB.2954.17,FB-PB.2954.129,FB-PB.2954.105,FB-PB.2954.120,FB-PB.2954.114,FB-PB.2954.107,FB-PB.2954.153,FB-PB.2954.138,FB-PB.2954.140,FB-PB.2954.84,FB-PB.2954.154,FB-PB.2954.149,FB-PB.2954.13,FB-PB.…
chr2	FB-PB.2954	FN1	SE	FB-PB.2954;SE:chr2:215372015-215372109:215372375-215373322:-	0.151867	0.0224775	Up	FB-PB.2954.138	FB-PB.2954.47,FB-PB.2954.164,FB-PB.2954.63,FB-PB.2954.69,FB-PB.2954.171,FB-PB.2954.39,FB-PB.2954.126,FB-PB.2954.79,FB-PB.2954.119,FB-PB.2954.88,FB-PB.2954.29,FB-PB.2954.109,FB-PB.2954.2,FB-PB.2954.116,FB-PB.2954.17,FB-PB.2954.129,FB-PB.2954.105,FB-PB.2954.120,FB-PB.2954.114,FB-PB.2954.107,FB-PB.2954.153,FB-PB.2954.138,FB-PB.2954.140,FB-PB.2954.84,FB-PB.2954.154,FB-PB.2954.149,FB-PB.2954.13,FB-PB.…
chr2	FB-PB.2954	FN1	SE	FB-PB.2954;SE:chr2:215372015-215372109:215372375-215373322:-	0.151867	0.0224775	Up	FB-PB.2954.134	FB-PB.2954.47,FB-PB.2954.164,FB-PB.2954.63,FB-PB.2954.69,FB-PB.2954.171,FB-PB.2954.39,FB-PB.2954.126,FB-PB.2954.79,FB-PB.2954.119,FB-PB.2954.88,FB-PB.2954.29,FB-PB.2954.109,FB-PB.2954.2,FB-PB.2954.116,FB-PB.2954.17,FB-PB.2954.129,FB-PB.2954.105,FB-PB.2954.120,FB-PB.2954.114,FB-PB.2954.107,FB-PB.2954.153,FB-PB.2954.138,FB-PB.2954.140,FB-PB.2954.84,FB-PB.2954.154,FB-PB.2954.149,FB-PB.2954.13,FB-PB.…
chr2	FB-PB.2954	FN1	SE	FB-PB.2954;SE:chr2:215372015-215372109:215372375-215373322:-	0.151867	0.0224775	Up	FB-PB.2954.136	FB-PB.2954.47,FB-PB.2954.164,FB-PB.2954.63,FB-PB.2954.69,FB-PB.2954.171,FB-PB.2954.39,FB-PB.2954.126,FB-PB.2954.79,FB-PB.2954.119,FB-PB.2954.88,FB-PB.2954.29,FB-PB.2954.109,FB-PB.2954.2,FB-PB.2954.116,FB-PB.2954.17,FB-PB.2954.129,FB-PB.2954.105,FB-PB.2954.120,FB-PB.2954.114,FB-PB.2954.107,FB-PB.2954.153,FB-PB.2954.138,FB-PB.2954.140,FB-PB.2954.84,FB-PB.2954.154,FB-PB.2954.149,FB-PB.2954.13,FB-PB.…
chr2	FB-PB.2954	FN1	SE	FB-PB.2954;SE:chr2:215372015-215372109:215372375-215373322:-	0.151867	0.0224775	Up	FB-PB.2954.132	FB-PB.2954.47,FB-PB.2954.164,FB-PB.2954.63,FB-PB.2954.69,FB-PB.2954.171,FB-PB.2954.39,FB-PB.2954.126,FB-PB.2954.79,FB-PB.2954.119,FB-PB.2954.88,FB-PB.2954.29,FB-PB.2954.109,FB-PB.2954.2,FB-PB.2954.116,FB-PB.2954.17,FB-PB.2954.129,FB-PB.2954.105,FB-PB.2954.120,FB-PB.2954.114,FB-PB.2954.107,FB-PB.2954.153,FB-PB.2954.138,FB-PB.2954.140,FB-PB.2954.84,FB-PB.2954.154,FB-PB.2954.149,FB-PB.2954.13,FB-PB.…
chr2	FB-PB.2954	FN1	SE	FB-PB.2954;SE:chr2:215372015-215372109:215372375-215373322:-	0.151867	0.0224775	Up	FB-PB.2954.122	FB-PB.2954.47,FB-PB.2954.164,FB-PB.2954.63,FB-PB.2954.69,FB-PB.2954.171,FB-PB.2954.39,FB-PB.2954.126,FB-PB.2954.79,FB-PB.2954.119,FB-PB.2954.88,FB-PB.2954.29,FB-PB.2954.109,FB-PB.2954.2,FB-PB.2954.116,FB-PB.2954.17,FB-PB.2954.129,FB-PB.2954.105,FB-PB.2954.120,FB-PB.2954.114,FB-PB.2954.107,FB-PB.2954.153,FB-PB.2954.138,FB-PB.2954.140,FB-PB.2954.84,FB-PB.2954.154,FB-PB.2954.149,FB-PB.2954.13,FB-PB.…
chr2	FB-PB.2954	FN1	SE	FB-PB.2954;SE:chr2:215372015-215372109:215372375-215373322:-	0.151867	0.0224775	Up	FB-PB.2954.131	FB-PB.2954.47,FB-PB.2954.164,FB-PB.2954.63,FB-PB.2954.69,FB-PB.2954.171,FB-PB.2954.39,FB-PB.2954.126,FB-PB.2954.79,FB-PB.2954.119,FB-PB.2954.88,FB-PB.2954.29,FB-PB.2954.109,FB-PB.2954.2,FB-PB.2954.116,FB-PB.2954.17,FB-PB.2954.129,FB-PB.2954.105,FB-PB.2954.120,FB-PB.2954.114,FB-PB.2954.107,FB-PB.2954.153,FB-PB.2954.138,FB-PB.2954.140,FB-PB.2954.84,FB-PB.2954.154,FB-PB.2954.149,FB-PB.2954.13,FB-PB.…
chr2	FB-PB.2954	FN1	SE	FB-PB.2954;SE:chr2:215372015-215372109:215372375-215373322:-	0.151867	0.0224775	Up	FB-PB.2954.121	FB-PB.2954.47,FB-PB.2954.164,FB-PB.2954.63,FB-PB.2954.69,FB-PB.2954.171,FB-PB.2954.39,FB-PB.2954.126,FB-PB.2954.79,FB-PB.2954.119,FB-PB.2954.88,FB-PB.2954.29,FB-PB.2954.109,FB-PB.2954.2,FB-PB.2954.116,FB-PB.2954.17,FB-PB.2954.129,FB-PB.2954.105,FB-PB.2954.120,FB-PB.2954.114,FB-PB.2954.107,FB-PB.2954.153,FB-PB.2954.138,FB-PB.2954.140,FB-PB.2954.84,FB-PB.2954.154,FB-PB.2954.149,FB-PB.2954.13,FB-PB.…
chr2	FB-PB.2954	FN1	SE	FB-PB.2954;SE:chr2:215372015-215372109:215372375-215373322:-	0.151867	0.0224775	Up	FB-PB.2954.133	FB-PB.2954.47,FB-PB.2954.164,FB-PB.2954.63,FB-PB.2954.69,FB-PB.2954.171,FB-PB.2954.39,FB-PB.2954.126,FB-PB.2954.79,FB-PB.2954.119,FB-PB.2954.88,FB-PB.2954.29,FB-PB.2954.109,FB-PB.2954.2,FB-PB.2954.116,FB-PB.2954.17,FB-PB.2954.129,FB-PB.2954.105,FB-PB.2954.120,FB-PB.2954.114,FB-PB.2954.107,FB-PB.2954.153,FB-PB.2954.138,FB-PB.2954.140,FB-PB.2954.84,FB-PB.2954.154,FB-PB.2954.149,FB-PB.2954.13,FB-PB.…
chr2	FB-PB.2954	FN1	SE	FB-PB.2954;SE:chr2:215372015-215372109:215372375-215373322:-	0.151867	0.0224775	Up	FB-PB.2954.126	FB-PB.2954.47,FB-PB.2954.164,FB-PB.2954.63,FB-PB.2954.69,FB-PB.2954.171,FB-PB.2954.39,FB-PB.2954.126,FB-PB.2954.79,FB-PB.2954.119,FB-PB.2954.88,FB-PB.2954.29,FB-PB.2954.109,FB-PB.2954.2,FB-PB.2954.116,FB-PB.2954.17,FB-PB.2954.129,FB-PB.2954.105,FB-PB.2954.120,FB-PB.2954.114,FB-PB.2954.107,FB-PB.2954.153,FB-PB.2954.138,FB-PB.2954.140,FB-PB.2954.84,FB-PB.2954.154,FB-PB.2954.149,FB-PB.2954.13,FB-PB.…
chr2	FB-PB.2954	FN1	SE	FB-PB.2954;SE:chr2:215372015-215372109:215372375-215373322:-	0.151867	0.0224775	Up	FB-PB.2954.124	FB-PB.2954.47,FB-PB.2954.164,FB-PB.2954.63,FB-PB.2954.69,FB-PB.2954.171,FB-PB.2954.39,FB-PB.2954.126,FB-PB.2954.79,FB-PB.2954.119,FB-PB.2954.88,FB-PB.2954.29,FB-PB.2954.109,FB-PB.2954.2,FB-PB.2954.116,FB-PB.2954.17,FB-PB.2954.129,FB-PB.2954.105,FB-PB.2954.120,FB-PB.2954.114,FB-PB.2954.107,FB-PB.2954.153,FB-PB.2954.138,FB-PB.2954.140,FB-PB.2954.84,FB-PB.2954.154,FB-PB.2954.149,FB-PB.2954.13,FB-PB.…
chr2	FB-PB.2954	FN1	SE	FB-PB.2954;SE:chr2:215372015-215372109:215372375-215373322:-	0.151867	0.0224775	Up	FB-PB.2954.129	FB-PB.2954.47,FB-PB.2954.164,FB-PB.2954.63,FB-PB.2954.69,FB-PB.2954.171,FB-PB.2954.39,FB-PB.2954.126,FB-PB.2954.79,FB-PB.2954.119,FB-PB.2954.88,FB-PB.2954.29,FB-PB.2954.109,FB-PB.2954.2,FB-PB.2954.116,FB-PB.2954.17,FB-PB.2954.129,FB-PB.2954.105,FB-PB.2954.120,FB-PB.2954.114,FB-PB.2954.107,FB-PB.2954.153,FB-PB.2954.138,FB-PB.2954.140,FB-PB.2954.84,FB-PB.2954.154,FB-PB.2954.149,FB-PB.2954.13,FB-PB.…
chr2	FB-PB.2954	FN1	SE	FB-PB.2954;SE:chr2:215372015-215372109:215372375-215373322:-	0.151867	0.0224775	Up	FB-PB.2954.130	FB-PB.2954.47,FB-PB.2954.164,FB-PB.2954.63,FB-PB.2954.69,FB-PB.2954.171,FB-PB.2954.39,FB-PB.2954.126,FB-PB.2954.79,FB-PB.2954.119,FB-PB.2954.88,FB-PB.2954.29,FB-PB.2954.109,FB-PB.2954.2,FB-PB.2954.116,FB-PB.2954.17,FB-PB.2954.129,FB-PB.2954.105,FB-PB.2954.120,FB-PB.2954.114,FB-PB.2954.107,FB-PB.2954.153,FB-PB.2954.138,FB-PB.2954.140,FB-PB.2954.84,FB-PB.2954.154,FB-PB.2954.149,FB-PB.2954.13,FB-PB.…
chr2	FB-PB.2954	FN1	SE	FB-PB.2954;SE:chr2:215372015-215372109:215372375-215373322:-	0.151867	0.0224775	Up	FB-PB.2954.127	FB-PB.2954.47,FB-PB.2954.164,FB-PB.2954.63,FB-PB.2954.69,FB-PB.2954.171,FB-PB.2954.39,FB-PB.2954.126,FB-PB.2954.79,FB-PB.2954.119,FB-PB.2954.88,FB-PB.2954.29,FB-PB.2954.109,FB-PB.2954.2,FB-PB.2954.116,FB-PB.2954.17,FB-PB.2954.129,FB-PB.2954.105,FB-PB.2954.120,FB-PB.2954.114,FB-PB.2954.107,FB-PB.2954.153,FB-PB.2954.138,FB-PB.2954.140,FB-PB.2954.84,FB-PB.2954.154,FB-PB.2954.149,FB-PB.2954.13,FB-PB.…
chr2	FB-PB.2954	FN1	SE	FB-PB.2954;SE:chr2:215372015-215372109:215372375-215373322:-	0.151867	0.0224775	Up	FB-PB.2954.120	FB-PB.2954.47,FB-PB.2954.164,FB-PB.2954.63,FB-PB.2954.69,FB-PB.2954.171,FB-PB.2954.39,FB-PB.2954.126,FB-PB.2954.79,FB-PB.2954.119,FB-PB.2954.88,FB-PB.2954.29,FB-PB.2954.109,FB-PB.2954.2,FB-PB.2954.116,FB-PB.2954.17,FB-PB.2954.129,FB-PB.2954.105,FB-PB.2954.120,FB-PB.2954.114,FB-PB.2954.107,FB-PB.2954.153,FB-PB.2954.138,FB-PB.2954.140,FB-PB.2954.84,FB-PB.2954.154,FB-PB.2954.149,FB-PB.2954.13,FB-PB.…
chr2	FB-PB.2954	FN1	SE	FB-PB.2954;SE:chr2:215372015-215372109:215372375-215373322:-	0.151867	0.0224775	Up	FB-PB.2954.96	FB-PB.2954.47,FB-PB.2954.164,FB-PB.2954.63,FB-PB.2954.69,FB-PB.2954.171,FB-PB.2954.39,FB-PB.2954.126,FB-PB.2954.79,FB-PB.2954.119,FB-PB.2954.88,FB-PB.2954.29,FB-PB.2954.109,FB-PB.2954.2,FB-PB.2954.116,FB-PB.2954.17,FB-PB.2954.129,FB-PB.2954.105,FB-PB.2954.120,FB-PB.2954.114,FB-PB.2954.107,FB-PB.2954.153,FB-PB.2954.138,FB-PB.2954.140,FB-PB.2954.84,FB-PB.2954.154,FB-PB.2954.149,FB-PB.2954.13,FB-PB.…
chr2	FB-PB.2954	FN1	SE	FB-PB.2954;SE:chr2:215372015-215372109:215372375-215373322:-	0.151867	0.0224775	Up	FB-PB.2954.101	FB-PB.2954.47,FB-PB.2954.164,FB-PB.2954.63,FB-PB.2954.69,FB-PB.2954.171,FB-PB.2954.39,FB-PB.2954.126,FB-PB.2954.79,FB-PB.2954.119,FB-PB.2954.88,FB-PB.2954.29,FB-PB.2954.109,FB-PB.2954.2,FB-PB.2954.116,FB-PB.2954.17,FB-PB.2954.129,FB-PB.2954.105,FB-PB.2954.120,FB-PB.2954.114,FB-PB.2954.107,FB-PB.2954.153,FB-PB.2954.138,FB-PB.2954.140,FB-PB.2954.84,FB-PB.2954.154,FB-PB.2954.149,FB-PB.2954.13,FB-PB.…
chr2	FB-PB.2954	FN1	SE	FB-PB.2954;SE:chr2:215372015-215372109:215372375-215373322:-	0.151867	0.0224775	Up	FB-PB.2954.119	FB-PB.2954.47,FB-PB.2954.164,FB-PB.2954.63,FB-PB.2954.69,FB-PB.2954.171,FB-PB.2954.39,FB-PB.2954.126,FB-PB.2954.79,FB-PB.2954.119,FB-PB.2954.88,FB-PB.2954.29,FB-PB.2954.109,FB-PB.2954.2,FB-PB.2954.116,FB-PB.2954.17,FB-PB.2954.129,FB-PB.2954.105,FB-PB.2954.120,FB-PB.2954.114,FB-PB.2954.107,FB-PB.2954.153,FB-PB.2954.138,FB-PB.2954.140,FB-PB.2954.84,FB-PB.2954.154,FB-PB.2954.149,FB-PB.2954.13,FB-PB.…
chr2	FB-PB.2954	FN1	SE	FB-PB.2954;SE:chr2:215372015-215372109:215372375-215373322:-	0.151867	0.0224775	Up	FB-PB.2954.98	FB-PB.2954.47,FB-PB.2954.164,FB-PB.2954.63,FB-PB.2954.69,FB-PB.2954.171,FB-PB.2954.39,FB-PB.2954.126,FB-PB.2954.79,FB-PB.2954.119,FB-PB.2954.88,FB-PB.2954.29,FB-PB.2954.109,FB-PB.2954.2,FB-PB.2954.116,FB-PB.2954.17,FB-PB.2954.129,FB-PB.2954.105,FB-PB.2954.120,FB-PB.2954.114,FB-PB.2954.107,FB-PB.2954.153,FB-PB.2954.138,FB-PB.2954.140,FB-PB.2954.84,FB-PB.2954.154,FB-PB.2954.149,FB-PB.2954.13,FB-PB.…
chr2	FB-PB.2954	FN1	SE	FB-PB.2954;SE:chr2:215372015-215372109:215372375-215373322:-	0.151867	0.0224775	Up	FB-PB.2954.93	FB-PB.2954.47,FB-PB.2954.164,FB-PB.2954.63,FB-PB.2954.69,FB-PB.2954.171,FB-PB.2954.39,FB-PB.2954.126,FB-PB.2954.79,FB-PB.2954.119,FB-PB.2954.88,FB-PB.2954.29,FB-PB.2954.109,FB-PB.2954.2,FB-PB.2954.116,FB-PB.2954.17,FB-PB.2954.129,FB-PB.2954.105,FB-PB.2954.120,FB-PB.2954.114,FB-PB.2954.107,FB-PB.2954.153,FB-PB.2954.138,FB-PB.2954.140,FB-PB.2954.84,FB-PB.2954.154,FB-PB.2954.149,FB-PB.2954.13,FB-PB.…
chr2	FB-PB.2954	FN1	SE	FB-PB.2954;SE:chr2:215372015-215372109:215372375-215373322:-	0.151867	0.0224775	Up	FB-PB.2954.95	FB-PB.2954.47,FB-PB.2954.164,FB-PB.2954.63,FB-PB.2954.69,FB-PB.2954.171,FB-PB.2954.39,FB-PB.2954.126,FB-PB.2954.79,FB-PB.2954.119,FB-PB.2954.88,FB-PB.2954.29,FB-PB.2954.109,FB-PB.2954.2,FB-PB.2954.116,FB-PB.2954.17,FB-PB.2954.129,FB-PB.2954.105,FB-PB.2954.120,FB-PB.2954.114,FB-PB.2954.107,FB-PB.2954.153,FB-PB.2954.138,FB-PB.2954.140,FB-PB.2954.84,FB-PB.2954.154,FB-PB.2954.149,FB-PB.2954.13,FB-PB.…
chr2	FB-PB.2954	FN1	SE	FB-PB.2954;SE:chr2:215372015-215372109:215372375-215373322:-	0.151867	0.0224775	Up	FB-PB.2954.99	FB-PB.2954.47,FB-PB.2954.164,FB-PB.2954.63,FB-PB.2954.69,FB-PB.2954.171,FB-PB.2954.39,FB-PB.2954.126,FB-PB.2954.79,FB-PB.2954.119,FB-PB.2954.88,FB-PB.2954.29,FB-PB.2954.109,FB-PB.2954.2,FB-PB.2954.116,FB-PB.2954.17,FB-PB.2954.129,FB-PB.2954.105,FB-PB.2954.120,FB-PB.2954.114,FB-PB.2954.107,FB-PB.2954.153,FB-PB.2954.138,FB-PB.2954.140,FB-PB.2954.84,FB-PB.2954.154,FB-PB.2954.149,FB-PB.2954.13,FB-PB.…
chr2	FB-PB.2954	FN1	SE	FB-PB.2954;SE:chr2:215372015-215372109:215372375-215373322:-	0.151867	0.0224775	Up	FB-PB.2954.90	FB-PB.2954.47,FB-PB.2954.164,FB-PB.2954.63,FB-PB.2954.69,FB-PB.2954.171,FB-PB.2954.39,FB-PB.2954.126,FB-PB.2954.79,FB-PB.2954.119,FB-PB.2954.88,FB-PB.2954.29,FB-PB.2954.109,FB-PB.2954.2,FB-PB.2954.116,FB-PB.2954.17,FB-PB.2954.129,FB-PB.2954.105,FB-PB.2954.120,FB-PB.2954.114,FB-PB.2954.107,FB-PB.2954.153,FB-PB.2954.138,FB-PB.2954.140,FB-PB.2954.84,FB-PB.2954.154,FB-PB.2954.149,FB-PB.2954.13,FB-PB.…
chr2	FB-PB.2954	FN1	SE	FB-PB.2954;SE:chr2:215372015-215372109:215372375-215373322:-	0.151867	0.0224775	Up	FB-PB.2954.97	FB-PB.2954.47,FB-PB.2954.164,FB-PB.2954.63,FB-PB.2954.69,FB-PB.2954.171,FB-PB.2954.39,FB-PB.2954.126,FB-PB.2954.79,FB-PB.2954.119,FB-PB.2954.88,FB-PB.2954.29,FB-PB.2954.109,FB-PB.2954.2,FB-PB.2954.116,FB-PB.2954.17,FB-PB.2954.129,FB-PB.2954.105,FB-PB.2954.120,FB-PB.2954.114,FB-PB.2954.107,FB-PB.2954.153,FB-PB.2954.138,FB-PB.2954.140,FB-PB.2954.84,FB-PB.2954.154,FB-PB.2954.149,FB-PB.2954.13,FB-PB.…
chr2	FB-PB.2954	FN1	SE	FB-PB.2954;SE:chr2:215372015-215372109:215372375-215373322:-	0.151867	0.0224775	Up	FB-PB.2954.89	FB-PB.2954.47,FB-PB.2954.164,FB-PB.2954.63,FB-PB.2954.69,FB-PB.2954.171,FB-PB.2954.39,FB-PB.2954.126,FB-PB.2954.79,FB-PB.2954.119,FB-PB.2954.88,FB-PB.2954.29,FB-PB.2954.109,FB-PB.2954.2,FB-PB.2954.116,FB-PB.2954.17,FB-PB.2954.129,FB-PB.2954.105,FB-PB.2954.120,FB-PB.2954.114,FB-PB.2954.107,FB-PB.2954.153,FB-PB.2954.138,FB-PB.2954.140,FB-PB.2954.84,FB-PB.2954.154,FB-PB.2954.149,FB-PB.2954.13,FB-PB.…
chr2	FB-PB.2954	FN1	SE	FB-PB.2954;SE:chr2:215372015-215372109:215372375-215373322:-	0.151867	0.0224775	Up	FB-PB.2954.110	FB-PB.2954.47,FB-PB.2954.164,FB-PB.2954.63,FB-PB.2954.69,FB-PB.2954.171,FB-PB.2954.39,FB-PB.2954.126,FB-PB.2954.79,FB-PB.2954.119,FB-PB.2954.88,FB-PB.2954.29,FB-PB.2954.109,FB-PB.2954.2,FB-PB.2954.116,FB-PB.2954.17,FB-PB.2954.129,FB-PB.2954.105,FB-PB.2954.120,FB-PB.2954.114,FB-PB.2954.107,FB-PB.2954.153,FB-PB.2954.138,FB-PB.2954.140,FB-PB.2954.84,FB-PB.2954.154,FB-PB.2954.149,FB-PB.2954.13,FB-PB.…
chr2	FB-PB.2954	FN1	SE	FB-PB.2954;SE:chr2:215372015-215372109:215372375-215373322:-	0.151867	0.0224775	Up	FB-PB.2954.111	FB-PB.2954.47,FB-PB.2954.164,FB-PB.2954.63,FB-PB.2954.69,FB-PB.2954.171,FB-PB.2954.39,FB-PB.2954.126,FB-PB.2954.79,FB-PB.2954.119,FB-PB.2954.88,FB-PB.2954.29,FB-PB.2954.109,FB-PB.2954.2,FB-PB.2954.116,FB-PB.2954.17,FB-PB.2954.129,FB-PB.2954.105,FB-PB.2954.120,FB-PB.2954.114,FB-PB.2954.107,FB-PB.2954.153,FB-PB.2954.138,FB-PB.2954.140,FB-PB.2954.84,FB-PB.2954.154,FB-PB.2954.149,FB-PB.2954.13,FB-PB.…
chr2	FB-PB.2954	FN1	SE	FB-PB.2954;SE:chr2:215372015-215372109:215372375-215373322:-	0.151867	0.0224775	Up	FB-PB.2954.109	FB-PB.2954.47,FB-PB.2954.164,FB-PB.2954.63,FB-PB.2954.69,FB-PB.2954.171,FB-PB.2954.39,FB-PB.2954.126,FB-PB.2954.79,FB-PB.2954.119,FB-PB.2954.88,FB-PB.2954.29,FB-PB.2954.109,FB-PB.2954.2,FB-PB.2954.116,FB-PB.2954.17,FB-PB.2954.129,FB-PB.2954.105,FB-PB.2954.120,FB-PB.2954.114,FB-PB.2954.107,FB-PB.2954.153,FB-PB.2954.138,FB-PB.2954.140,FB-PB.2954.84,FB-PB.2954.154,FB-PB.2954.149,FB-PB.2954.13,FB-PB.…
chr2	FB-PB.2954	FN1	SE	FB-PB.2954;SE:chr2:215372015-215372109:215372375-215373322:-	0.151867	0.0224775	Up	FB-PB.2954.116	FB-PB.2954.47,FB-PB.2954.164,FB-PB.2954.63,FB-PB.2954.69,FB-PB.2954.171,FB-PB.2954.39,FB-PB.2954.126,FB-PB.2954.79,FB-PB.2954.119,FB-PB.2954.88,FB-PB.2954.29,FB-PB.2954.109,FB-PB.2954.2,FB-PB.2954.116,FB-PB.2954.17,FB-PB.2954.129,FB-PB.2954.105,FB-PB.2954.120,FB-PB.2954.114,FB-PB.2954.107,FB-PB.2954.153,FB-PB.2954.138,FB-PB.2954.140,FB-PB.2954.84,FB-PB.2954.154,FB-PB.2954.149,FB-PB.2954.13,FB-PB.…
chr2	FB-PB.2954	FN1	SE	FB-PB.2954;SE:chr2:215372015-215372109:215372375-215373322:-	0.151867	0.0224775	Up	FB-PB.2954.114	FB-PB.2954.47,FB-PB.2954.164,FB-PB.2954.63,FB-PB.2954.69,FB-PB.2954.171,FB-PB.2954.39,FB-PB.2954.126,FB-PB.2954.79,FB-PB.2954.119,FB-PB.2954.88,FB-PB.2954.29,FB-PB.2954.109,FB-PB.2954.2,FB-PB.2954.116,FB-PB.2954.17,FB-PB.2954.129,FB-PB.2954.105,FB-PB.2954.120,FB-PB.2954.114,FB-PB.2954.107,FB-PB.2954.153,FB-PB.2954.138,FB-PB.2954.140,FB-PB.2954.84,FB-PB.2954.154,FB-PB.2954.149,FB-PB.2954.13,FB-PB.…
chr2	FB-PB.2954	FN1	SE	FB-PB.2954;SE:chr2:215372015-215372109:215372375-215373322:-	0.151867	0.0224775	Up	FB-PB.2954.115	FB-PB.2954.47,FB-PB.2954.164,FB-PB.2954.63,FB-PB.2954.69,FB-PB.2954.171,FB-PB.2954.39,FB-PB.2954.126,FB-PB.2954.79,FB-PB.2954.119,FB-PB.2954.88,FB-PB.2954.29,FB-PB.2954.109,FB-PB.2954.2,FB-PB.2954.116,FB-PB.2954.17,FB-PB.2954.129,FB-PB.2954.105,FB-PB.2954.120,FB-PB.2954.114,FB-PB.2954.107,FB-PB.2954.153,FB-PB.2954.138,FB-PB.2954.140,FB-PB.2954.84,FB-PB.2954.154,FB-PB.2954.149,FB-PB.2954.13,FB-PB.…
chr2	FB-PB.2954	FN1	SE	FB-PB.2954;SE:chr2:215372015-215372109:215372375-215373322:-	0.151867	0.0224775	Up	FB-PB.2954.113	FB-PB.2954.47,FB-PB.2954.164,FB-PB.2954.63,FB-PB.2954.69,FB-PB.2954.171,FB-PB.2954.39,FB-PB.2954.126,FB-PB.2954.79,FB-PB.2954.119,FB-PB.2954.88,FB-PB.2954.29,FB-PB.2954.109,FB-PB.2954.2,FB-PB.2954.116,FB-PB.2954.17,FB-PB.2954.129,FB-PB.2954.105,FB-PB.2954.120,FB-PB.2954.114,FB-PB.2954.107,FB-PB.2954.153,FB-PB.2954.138,FB-PB.2954.140,FB-PB.2954.84,FB-PB.2954.154,FB-PB.2954.149,FB-PB.2954.13,FB-PB.…
chr2	FB-PB.2954	FN1	SE	FB-PB.2954;SE:chr2:215372015-215372109:215372375-215373322:-	0.151867	0.0224775	Up	FB-PB.2954.112	FB-PB.2954.47,FB-PB.2954.164,FB-PB.2954.63,FB-PB.2954.69,FB-PB.2954.171,FB-PB.2954.39,FB-PB.2954.126,FB-PB.2954.79,FB-PB.2954.119,FB-PB.2954.88,FB-PB.2954.29,FB-PB.2954.109,FB-PB.2954.2,FB-PB.2954.116,FB-PB.2954.17,FB-PB.2954.129,FB-PB.2954.105,FB-PB.2954.120,FB-PB.2954.114,FB-PB.2954.107,FB-PB.2954.153,FB-PB.2954.138,FB-PB.2954.140,FB-PB.2954.84,FB-PB.2954.154,FB-PB.2954.149,FB-PB.2954.13,FB-PB.…
chr2	FB-PB.2954	FN1	SE	FB-PB.2954;SE:chr2:215372015-215372109:215372375-215373322:-	0.151867	0.0224775	Up	FB-PB.2954.107	FB-PB.2954.47,FB-PB.2954.164,FB-PB.2954.63,FB-PB.2954.69,FB-PB.2954.171,FB-PB.2954.39,FB-PB.2954.126,FB-PB.2954.79,FB-PB.2954.119,FB-PB.2954.88,FB-PB.2954.29,FB-PB.2954.109,FB-PB.2954.2,FB-PB.2954.116,FB-PB.2954.17,FB-PB.2954.129,FB-PB.2954.105,FB-PB.2954.120,FB-PB.2954.114,FB-PB.2954.107,FB-PB.2954.153,FB-PB.2954.138,FB-PB.2954.140,FB-PB.2954.84,FB-PB.2954.154,FB-PB.2954.149,FB-PB.2954.13,FB-PB.…
chr2	FB-PB.2954	FN1	SE	FB-PB.2954;SE:chr2:215372015-215372109:215372375-215373322:-	0.151867	0.0224775	Up	FB-PB.2954.106	FB-PB.2954.47,FB-PB.2954.164,FB-PB.2954.63,FB-PB.2954.69,FB-PB.2954.171,FB-PB.2954.39,FB-PB.2954.126,FB-PB.2954.79,FB-PB.2954.119,FB-PB.2954.88,FB-PB.2954.29,FB-PB.2954.109,FB-PB.2954.2,FB-PB.2954.116,FB-PB.2954.17,FB-PB.2954.129,FB-PB.2954.105,FB-PB.2954.120,FB-PB.2954.114,FB-PB.2954.107,FB-PB.2954.153,FB-PB.2954.138,FB-PB.2954.140,FB-PB.2954.84,FB-PB.2954.154,FB-PB.2954.149,FB-PB.2954.13,FB-PB.…
chr2	FB-PB.2954	FN1	SE	FB-PB.2954;SE:chr2:215372015-215372109:215372375-215373322:-	0.151867	0.0224775	Up	FB-PB.2954.105	FB-PB.2954.47,FB-PB.2954.164,FB-PB.2954.63,FB-PB.2954.69,FB-PB.2954.171,FB-PB.2954.39,FB-PB.2954.126,FB-PB.2954.79,FB-PB.2954.119,FB-PB.2954.88,FB-PB.2954.29,FB-PB.2954.109,FB-PB.2954.2,FB-PB.2954.116,FB-PB.2954.17,FB-PB.2954.129,FB-PB.2954.105,FB-PB.2954.120,FB-PB.2954.114,FB-PB.2954.107,FB-PB.2954.153,FB-PB.2954.138,FB-PB.2954.140,FB-PB.2954.84,FB-PB.2954.154,FB-PB.2954.149,FB-PB.2954.13,FB-PB.…
chr2	FB-PB.2954	FN1	SE	FB-PB.2954;SE:chr2:215372015-215372109:215372375-215373322:-	0.151867	0.0224775	Up	FB-PB.2954.103	FB-PB.2954.47,FB-PB.2954.164,FB-PB.2954.63,FB-PB.2954.69,FB-PB.2954.171,FB-PB.2954.39,FB-PB.2954.126,FB-PB.2954.79,FB-PB.2954.119,FB-PB.2954.88,FB-PB.2954.29,FB-PB.2954.109,FB-PB.2954.2,FB-PB.2954.116,FB-PB.2954.17,FB-PB.2954.129,FB-PB.2954.105,FB-PB.2954.120,FB-PB.2954.114,FB-PB.2954.107,FB-PB.2954.153,FB-PB.2954.138,FB-PB.2954.140,FB-PB.2954.84,FB-PB.2954.154,FB-PB.2954.149,FB-PB.2954.13,FB-PB.…
chr2	FB-PB.2954	FN1	SE	FB-PB.2954;SE:chr2:215372015-215372109:215372375-215373322:-	0.151867	0.0224775	Up	FB-PB.2954.18	FB-PB.2954.47,FB-PB.2954.164,FB-PB.2954.63,FB-PB.2954.69,FB-PB.2954.171,FB-PB.2954.39,FB-PB.2954.126,FB-PB.2954.79,FB-PB.2954.119,FB-PB.2954.88,FB-PB.2954.29,FB-PB.2954.109,FB-PB.2954.2,FB-PB.2954.116,FB-PB.2954.17,FB-PB.2954.129,FB-PB.2954.105,FB-PB.2954.120,FB-PB.2954.114,FB-PB.2954.107,FB-PB.2954.153,FB-PB.2954.138,FB-PB.2954.140,FB-PB.2954.84,FB-PB.2954.154,FB-PB.2954.149,FB-PB.2954.13,FB-PB.…
chr2	FB-PB.2954	FN1	SE	FB-PB.2954;SE:chr2:215372015-215372109:215372375-215373322:-	0.151867	0.0224775	Up	FB-PB.2954.164	FB-PB.2954.47,FB-PB.2954.164,FB-PB.2954.63,FB-PB.2954.69,FB-PB.2954.171,FB-PB.2954.39,FB-PB.2954.126,FB-PB.2954.79,FB-PB.2954.119,FB-PB.2954.88,FB-PB.2954.29,FB-PB.2954.109,FB-PB.2954.2,FB-PB.2954.116,FB-PB.2954.17,FB-PB.2954.129,FB-PB.2954.105,FB-PB.2954.120,FB-PB.2954.114,FB-PB.2954.107,FB-PB.2954.153,FB-PB.2954.138,FB-PB.2954.140,FB-PB.2954.84,FB-PB.2954.154,FB-PB.2954.149,FB-PB.2954.13,FB-PB.…
chr2	FB-PB.2954	FN1	SE	FB-PB.2954;SE:chr2:215372015-215372109:215372375-215373322:-	0.151867	0.0224775	Up	FB-PB.2954.163	FB-PB.2954.47,FB-PB.2954.164,FB-PB.2954.63,FB-PB.2954.69,FB-PB.2954.171,FB-PB.2954.39,FB-PB.2954.126,FB-PB.2954.79,FB-PB.2954.119,FB-PB.2954.88,FB-PB.2954.29,FB-PB.2954.109,FB-PB.2954.2,FB-PB.2954.116,FB-PB.2954.17,FB-PB.2954.129,FB-PB.2954.105,FB-PB.2954.120,FB-PB.2954.114,FB-PB.2954.107,FB-PB.2954.153,FB-PB.2954.138,FB-PB.2954.140,FB-PB.2954.84,FB-PB.2954.154,FB-PB.2954.149,FB-PB.2954.13,FB-PB.…
chr2	FB-PB.2954	FN1	SE	FB-PB.2954;SE:chr2:215372015-215372109:215372375-215373322:-	0.151867	0.0224775	Up	FB-PB.2954.155	FB-PB.2954.47,FB-PB.2954.164,FB-PB.2954.63,FB-PB.2954.69,FB-PB.2954.171,FB-PB.2954.39,FB-PB.2954.126,FB-PB.2954.79,FB-PB.2954.119,FB-PB.2954.88,FB-PB.2954.29,FB-PB.2954.109,FB-PB.2954.2,FB-PB.2954.116,FB-PB.2954.17,FB-PB.2954.129,FB-PB.2954.105,FB-PB.2954.120,FB-PB.2954.114,FB-PB.2954.107,FB-PB.2954.153,FB-PB.2954.138,FB-PB.2954.140,FB-PB.2954.84,FB-PB.2954.154,FB-PB.2954.149,FB-PB.2954.13,FB-PB.…
chr2	FB-PB.2954	FN1	SE	FB-PB.2954;SE:chr2:215372015-215372109:215372375-215373322:-	0.151867	0.0224775	Up	FB-PB.2954.158	FB-PB.2954.47,FB-PB.2954.164,FB-PB.2954.63,FB-PB.2954.69,FB-PB.2954.171,FB-PB.2954.39,FB-PB.2954.126,FB-PB.2954.79,FB-PB.2954.119,FB-PB.2954.88,FB-PB.2954.29,FB-PB.2954.109,FB-PB.2954.2,FB-PB.2954.116,FB-PB.2954.17,FB-PB.2954.129,FB-PB.2954.105,FB-PB.2954.120,FB-PB.2954.114,FB-PB.2954.107,FB-PB.2954.153,FB-PB.2954.138,FB-PB.2954.140,FB-PB.2954.84,FB-PB.2954.154,FB-PB.2954.149,FB-PB.2954.13,FB-PB.…
chr2	FB-PB.2954	FN1	SE	FB-PB.2954;SE:chr2:215372015-215372109:215372375-215373322:-	0.151867	0.0224775	Up	FB-PB.2954.108	FB-PB.2954.47,FB-PB.2954.164,FB-PB.2954.63,FB-PB.2954.69,FB-PB.2954.171,FB-PB.2954.39,FB-PB.2954.126,FB-PB.2954.79,FB-PB.2954.119,FB-PB.2954.88,FB-PB.2954.29,FB-PB.2954.109,FB-PB.2954.2,FB-PB.2954.116,FB-PB.2954.17,FB-PB.2954.129,FB-PB.2954.105,FB-PB.2954.120,FB-PB.2954.114,FB-PB.2954.107,FB-PB.2954.153,FB-PB.2954.138,FB-PB.2954.140,FB-PB.2954.84,FB-PB.2954.154,FB-PB.2954.149,FB-PB.2954.13,FB-PB.…
chr2	FB-PB.2954	FN1	SE	FB-PB.2954;SE:chr2:215372015-215372109:215372375-215373322:-	0.151867	0.0224775	Up	FB-PB.2954.153	FB-PB.2954.47,FB-PB.2954.164,FB-PB.2954.63,FB-PB.2954.69,FB-PB.2954.171,FB-PB.2954.39,FB-PB.2954.126,FB-PB.2954.79,FB-PB.2954.119,FB-PB.2954.88,FB-PB.2954.29,FB-PB.2954.109,FB-PB.2954.2,FB-PB.2954.116,FB-PB.2954.17,FB-PB.2954.129,FB-PB.2954.105,FB-PB.2954.120,FB-PB.2954.114,FB-PB.2954.107,FB-PB.2954.153,FB-PB.2954.138,FB-PB.2954.140,FB-PB.2954.84,FB-PB.2954.154,FB-PB.2954.149,FB-PB.2954.13,FB-PB.…
chr2	FB-PB.2954	FN1	SE	FB-PB.2954;SE:chr2:215372015-215372109:215372375-215373322:-	0.151867	0.0224775	Up	FB-PB.2954.13	FB-PB.2954.47,FB-PB.2954.164,FB-PB.2954.63,FB-PB.2954.69,FB-PB.2954.171,FB-PB.2954.39,FB-PB.2954.126,FB-PB.2954.79,FB-PB.2954.119,FB-PB.2954.88,FB-PB.2954.29,FB-PB.2954.109,FB-PB.2954.2,FB-PB.2954.116,FB-PB.2954.17,FB-PB.2954.129,FB-PB.2954.105,FB-PB.2954.120,FB-PB.2954.114,FB-PB.2954.107,FB-PB.2954.153,FB-PB.2954.138,FB-PB.2954.140,FB-PB.2954.84,FB-PB.2954.154,FB-PB.2954.149,FB-PB.2954.13,FB-PB.…
chr2	FB-PB.2954	FN1	SE	FB-PB.2954;SE:chr2:215372015-215372109:215372375-215373322:-	0.151867	0.0224775	Up	FB-PB.2954.171	FB-PB.2954.47,FB-PB.2954.164,FB-PB.2954.63,FB-PB.2954.69,FB-PB.2954.171,FB-PB.2954.39,FB-PB.2954.126,FB-PB.2954.79,FB-PB.2954.119,FB-PB.2954.88,FB-PB.2954.29,FB-PB.2954.109,FB-PB.2954.2,FB-PB.2954.116,FB-PB.2954.17,FB-PB.2954.129,FB-PB.2954.105,FB-PB.2954.120,FB-PB.2954.114,FB-PB.2954.107,FB-PB.2954.153,FB-PB.2954.138,FB-PB.2954.140,FB-PB.2954.84,FB-PB.2954.154,FB-PB.2954.149,FB-PB.2954.13,FB-PB.…
chr2	FB-PB.2954	FN1	SE	FB-PB.2954;SE:chr2:215372015-215372109:215372375-215373322:-	0.151867	0.0224775	Up	FB-PB.2954.170	FB-PB.2954.47,FB-PB.2954.164,FB-PB.2954.63,FB-PB.2954.69,FB-PB.2954.171,FB-PB.2954.39,FB-PB.2954.126,FB-PB.2954.79,FB-PB.2954.119,FB-PB.2954.88,FB-PB.2954.29,FB-PB.2954.109,FB-PB.2954.2,FB-PB.2954.116,FB-PB.2954.17,FB-PB.2954.129,FB-PB.2954.105,FB-PB.2954.120,FB-PB.2954.114,FB-PB.2954.107,FB-PB.2954.153,FB-PB.2954.138,FB-PB.2954.140,FB-PB.2954.84,FB-PB.2954.154,FB-PB.2954.149,FB-PB.2954.13,FB-PB.…
chr2	FB-PB.2954	FN1	SE	FB-PB.2954;SE:chr2:215372015-215372109:215372375-215373322:-	0.151867	0.0224775	Up	FB-PB.2954.166	FB-PB.2954.47,FB-PB.2954.164,FB-PB.2954.63,FB-PB.2954.69,FB-PB.2954.171,FB-PB.2954.39,FB-PB.2954.126,FB-PB.2954.79,FB-PB.2954.119,FB-PB.2954.88,FB-PB.2954.29,FB-PB.2954.109,FB-PB.2954.2,FB-PB.2954.116,FB-PB.2954.17,FB-PB.2954.129,FB-PB.2954.105,FB-PB.2954.120,FB-PB.2954.114,FB-PB.2954.107,FB-PB.2954.153,FB-PB.2954.138,FB-PB.2954.140,FB-PB.2954.84,FB-PB.2954.154,FB-PB.2954.149,FB-PB.2954.13,FB-PB.…
chr2	FB-PB.2954	FN1	SE	FB-PB.2954;SE:chr2:215372015-215372109:215372375-215373322:-	0.151867	0.0224775	Up	FB-PB.2954.168	FB-PB.2954.47,FB-PB.2954.164,FB-PB.2954.63,FB-PB.2954.69,FB-PB.2954.171,FB-PB.2954.39,FB-PB.2954.126,FB-PB.2954.79,FB-PB.2954.119,FB-PB.2954.88,FB-PB.2954.29,FB-PB.2954.109,FB-PB.2954.2,FB-PB.2954.116,FB-PB.2954.17,FB-PB.2954.129,FB-PB.2954.105,FB-PB.2954.120,FB-PB.2954.114,FB-PB.2954.107,FB-PB.2954.153,FB-PB.2954.138,FB-PB.2954.140,FB-PB.2954.84,FB-PB.2954.154,FB-PB.2954.149,FB-PB.2954.13,FB-PB.…
chr2	FB-PB.2954	FN1	SE	FB-PB.2954;SE:chr2:215372015-215372109:215372375-215373322:-	0.151867	0.0224775	Up	FB-PB.2954.172	FB-PB.2954.47,FB-PB.2954.164,FB-PB.2954.63,FB-PB.2954.69,FB-PB.2954.171,FB-PB.2954.39,FB-PB.2954.126,FB-PB.2954.79,FB-PB.2954.119,FB-PB.2954.88,FB-PB.2954.29,FB-PB.2954.109,FB-PB.2954.2,FB-PB.2954.116,FB-PB.2954.17,FB-PB.2954.129,FB-PB.2954.105,FB-PB.2954.120,FB-PB.2954.114,FB-PB.2954.107,FB-PB.2954.153,FB-PB.2954.138,FB-PB.2954.140,FB-PB.2954.84,FB-PB.2954.154,FB-PB.2954.149,FB-PB.2954.13,FB-PB.…
chr10	FB-PB.594	ABI1	A3	FB-PB.594;A3:chr10:26759238-26765218:26759235-26765218:-	0.158069	0.0284715	Up	FB-PB.594.2	FB-PB.594.4,FB-PB.594.2,FB-PB.594.3
chr10	FB-PB.594	ABI1	A3	FB-PB.594;A3:chr10:26759238-26765218:26759235-26765218:-	0.158069	0.0284715	Up	FB-PB.594.3	FB-PB.594.4,FB-PB.594.2,FB-PB.594.3
chr2	FB-PB.2911	MYO1B	SE	FB-PB.2911;SE:chr2:191400468-191402632:191402718-191408115:+	0.163581	0.014985	Up	FB-PB.2911.2	FB-PB.2911.3,FB-PB.2911.1,FB-PB.2911.6,FB-PB.2911.7,FB-PB.2911.5,FB-PB.2911.2
chr2	FB-PB.2911	MYO1B	SE	FB-PB.2911;SE:chr2:191400468-191402632:191402718-191408115:+	0.163581	0.014985	Up	FB-PB.2911.7	FB-PB.2911.3,FB-PB.2911.1,FB-PB.2911.6,FB-PB.2911.7,FB-PB.2911.5,FB-PB.2911.2
chr2	FB-PB.2911	MYO1B	SE	FB-PB.2911;SE:chr2:191400468-191402632:191402718-191408115:+	0.163581	0.014985	Up	FB-PB.2911.6	FB-PB.2911.3,FB-PB.2911.1,FB-PB.2911.6,FB-PB.2911.7,FB-PB.2911.5,FB-PB.2911.2
chr3	FB-PB.3623	EIF4G1	SE	FB-PB.3623;SE:chr3:184315856-184316132:184316218-184317321:+	0.185558	0.030969	Up	FB-PB.3623.3	FB-PB.3623.5,FB-PB.3623.4,FB-PB.3623.7,FB-PB.3623.6,FB-PB.3623.3,FB-PB.3623.8
chr3	FB-PB.3623	EIF4G1	SE	FB-PB.3623;SE:chr3:184315856-184316132:184316218-184317321:+	0.185558	0.030969	Up	FB-PB.3623.4	FB-PB.3623.5,FB-PB.3623.4,FB-PB.3623.7,FB-PB.3623.6,FB-PB.3623.3,FB-PB.3623.8
chr3	FB-PB.3623	EIF4G1	SE	FB-PB.3623;SE:chr3:184315856-184316132:184316218-184317321:+	0.185558	0.030969	Up	FB-PB.3623.5	FB-PB.3623.5,FB-PB.3623.4,FB-PB.3623.7,FB-PB.3623.6,FB-PB.3623.3,FB-PB.3623.8
chr3	FB-PB.3623	EIF4G1	SE	FB-PB.3623;SE:chr3:184315856-184316132:184316218-184317321:+	0.185558	0.030969	Up	FB-PB.3623.7	FB-PB.3623.5,FB-PB.3623.4,FB-PB.3623.7,FB-PB.3623.6,FB-PB.3623.3,FB-PB.3623.8
chr3	FB-PB.3623	EIF4G1	SE	FB-PB.3623;SE:chr3:184315856-184316132:184316218-184317321:+	0.185558	0.030969	Up	FB-PB.3623.8	FB-PB.3623.5,FB-PB.3623.4,FB-PB.3623.7,FB-PB.3623.6,FB-PB.3623.3,FB-PB.3623.8
chr1	FB-PB.369	USP21	RI	FB-PB.369;RI:chr1:161164534:161164612-161164835:161164942:+	0.192491	0.0434565	Up	FB-PB.369.2	FB-PB.369.2,FB-PB.369.1,FB-PB.369.3
chr19	FB-PB.2446	MAP2K7	RI	FB-PB.2446;RI:chr19:7910980:7911159-7911250:7911330:+	0.228487	0.031968	Up	FB-PB.2446.2	FB-PB.2446.4,FB-PB.2446.1,FB-PB.2446.2
chr6	FB-PB.4237	C6orf89	SE	FB-PB.4237;SE:chr6:36886028-36894504:36894603-36899426:+	0.245441	0.0264735	Up	FB-PB.4237.2	FB-PB.4237.2,FB-PB.4237.1
chr1	FB-PB.115	AKIRIN1	RI	FB-PB.115;RI:chr1:39004045:39005298-39005308:39005323:+	0.335152	0.00899101	Up	FB-PB.115.3	FB-PB.115.3,FB-PB.115.1
chr16	FB-PB.1909	GLYR1	SE	FB-PB.1909;SE:chr16:4823907-4831979:4832221-4832774:-	0.358632	0.00799201	Up	FB-PB.1909.1	FB-PB.1909.2,FB-PB.1909.4,FB-PB.1909.1,FB-PB.1909.3
chr16	FB-PB.1909	GLYR1	SE	FB-PB.1909;SE:chr16:4823907-4831979:4832221-4832774:-	0.358632	0.00799201	Up	FB-PB.1909.3	FB-PB.1909.2,FB-PB.1909.4,FB-PB.1909.1,FB-PB.1909.3
chr16	FB-PB.1909	GLYR1	SE	FB-PB.1909;SE:chr16:4823907-4831979:4832221-4832774:-	0.358632	0.00799201	Up	FB-PB.1909.2	FB-PB.1909.2,FB-PB.1909.4,FB-PB.1909.1,FB-PB.1909.3
chr1	FB-PB.178	LEPR	AL	FB-PB.178;AL:chr1:65622981-65630202:65630436:65622981-65633152:65635427:+	0.359122	0.0233333	Up	FB-PB.178.4	FB-PB.178.4,FB-PB.178.3
chr11	FB-PB.1020	BIRC2	RI	FB-PB.1020;RI:chr11:102348598:102348764-102349878:102350749:+	0.410928	0.00849151	Up	FB-PB.1020.3	FB-PB.1020.4,FB-PB.1020.3
chr1	FB-PB.133	KIF2C	SE	FB-PB.133;SE:chr1:44750564-44753132:44753254-44753733:+	0.502835	0.024975	Up	FB-PB.133.2	FB-PB.133.2,FB-PB.133.1
chr2	FB-PB.2954	FN1	SE	FB-PB.2954;SE:chr2:215379317-215380811:215381080-215382212:-	0.515594	0	Up	FB-PB.2954.1	FB-PB.2954.47,FB-PB.2954.164,FB-PB.2954.76,FB-PB.2954.123,FB-PB.2954.63,FB-PB.2954.167,FB-PB.2954.69,FB-PB.2954.171,FB-PB.2954.1,FB-PB.2954.39,FB-PB.2954.126,FB-PB.2954.79,FB-PB.2954.119,FB-PB.2954.88,FB-PB.2954.29,FB-PB.2954.109,FB-PB.2954.2,FB-PB.2954.116,FB-PB.2954.17,FB-PB.2954.129,FB-PB.2954.105,FB-PB.2954.120,FB-PB.2954.142,FB-PB.2954.114,FB-PB.2954.107,FB-PB.2954.31,FB-PB.2954.153,FB-PB.29…
chr2	FB-PB.2954	FN1	SE	FB-PB.2954;SE:chr2:215379317-215380811:215381080-215382212:-	0.515594	0	Up	FB-PB.2954.2	FB-PB.2954.47,FB-PB.2954.164,FB-PB.2954.76,FB-PB.2954.123,FB-PB.2954.63,FB-PB.2954.167,FB-PB.2954.69,FB-PB.2954.171,FB-PB.2954.1,FB-PB.2954.39,FB-PB.2954.126,FB-PB.2954.79,FB-PB.2954.119,FB-PB.2954.88,FB-PB.2954.29,FB-PB.2954.109,FB-PB.2954.2,FB-PB.2954.116,FB-PB.2954.17,FB-PB.2954.129,FB-PB.2954.105,FB-PB.2954.120,FB-PB.2954.142,FB-PB.2954.114,FB-PB.2954.107,FB-PB.2954.31,FB-PB.2954.153,FB-PB.29…
chr2	FB-PB.2954	FN1	SE	FB-PB.2954;SE:chr2:215379317-215380811:215381080-215382212:-	0.515594	0	Up	FB-PB.2954.3	FB-PB.2954.47,FB-PB.2954.164,FB-PB.2954.76,FB-PB.2954.123,FB-PB.2954.63,FB-PB.2954.167,FB-PB.2954.69,FB-PB.2954.171,FB-PB.2954.1,FB-PB.2954.39,FB-PB.2954.126,FB-PB.2954.79,FB-PB.2954.119,FB-PB.2954.88,FB-PB.2954.29,FB-PB.2954.109,FB-PB.2954.2,FB-PB.2954.116,FB-PB.2954.17,FB-PB.2954.129,FB-PB.2954.105,FB-PB.2954.120,FB-PB.2954.142,FB-PB.2954.114,FB-PB.2954.107,FB-PB.2954.31,FB-PB.2954.153,FB-PB.29…
chr2	FB-PB.2954	FN1	SE	FB-PB.2954;SE:chr2:215379317-215380811:215381080-215382212:-	0.515594	0	Up	FB-PB.2954.8	FB-PB.2954.47,FB-PB.2954.164,FB-PB.2954.76,FB-PB.2954.123,FB-PB.2954.63,FB-PB.2954.167,FB-PB.2954.69,FB-PB.2954.171,FB-PB.2954.1,FB-PB.2954.39,FB-PB.2954.126,FB-PB.2954.79,FB-PB.2954.119,FB-PB.2954.88,FB-PB.2954.29,FB-PB.2954.109,FB-PB.2954.2,FB-PB.2954.116,FB-PB.2954.17,FB-PB.2954.129,FB-PB.2954.105,FB-PB.2954.120,FB-PB.2954.142,FB-PB.2954.114,FB-PB.2954.107,FB-PB.2954.31,FB-PB.2954.153,FB-PB.29…
chr2	FB-PB.2954	FN1	SE	FB-PB.2954;SE:chr2:215379317-215380811:215381080-215382212:-	0.515594	0	Up	FB-PB.2954.9	FB-PB.2954.47,FB-PB.2954.164,FB-PB.2954.76,FB-PB.2954.123,FB-PB.2954.63,FB-PB.2954.167,FB-PB.2954.69,FB-PB.2954.171,FB-PB.2954.1,FB-PB.2954.39,FB-PB.2954.126,FB-PB.2954.79,FB-PB.2954.119,FB-PB.2954.88,FB-PB.2954.29,FB-PB.2954.109,FB-PB.2954.2,FB-PB.2954.116,FB-PB.2954.17,FB-PB.2954.129,FB-PB.2954.105,FB-PB.2954.120,FB-PB.2954.142,FB-PB.2954.114,FB-PB.2954.107,FB-PB.2954.31,FB-PB.2954.153,FB-PB.29…
chr2	FB-PB.2954	FN1	SE	FB-PB.2954;SE:chr2:215379317-215380811:215381080-215382212:-	0.515594	0	Up	FB-PB.2954.11	FB-PB.2954.47,FB-PB.2954.164,FB-PB.2954.76,FB-PB.2954.123,FB-PB.2954.63,FB-PB.2954.167,FB-PB.2954.69,FB-PB.2954.171,FB-PB.2954.1,FB-PB.2954.39,FB-PB.2954.126,FB-PB.2954.79,FB-PB.2954.119,FB-PB.2954.88,FB-PB.2954.29,FB-PB.2954.109,FB-PB.2954.2,FB-PB.2954.116,FB-PB.2954.17,FB-PB.2954.129,FB-PB.2954.105,FB-PB.2954.120,FB-PB.2954.142,FB-PB.2954.114,FB-PB.2954.107,FB-PB.2954.31,FB-PB.2954.153,FB-PB.29…
chr2	FB-PB.2954	FN1	SE	FB-PB.2954;SE:chr2:215379317-215380811:215381080-215382212:-	0.515594	0	Up	FB-PB.2954.76	FB-PB.2954.47,FB-PB.2954.164,FB-PB.2954.76,FB-PB.2954.123,FB-PB.2954.63,FB-PB.2954.167,FB-PB.2954.69,FB-PB.2954.171,FB-PB.2954.1,FB-PB.2954.39,FB-PB.2954.126,FB-PB.2954.79,FB-PB.2954.119,FB-PB.2954.88,FB-PB.2954.29,FB-PB.2954.109,FB-PB.2954.2,FB-PB.2954.116,FB-PB.2954.17,FB-PB.2954.129,FB-PB.2954.105,FB-PB.2954.120,FB-PB.2954.142,FB-PB.2954.114,FB-PB.2954.107,FB-PB.2954.31,FB-PB.2954.153,FB-PB.29…
chr2	FB-PB.2954	FN1	SE	FB-PB.2954;SE:chr2:215379317-215380811:215381080-215382212:-	0.515594	0	Up	FB-PB.2954.77	FB-PB.2954.47,FB-PB.2954.164,FB-PB.2954.76,FB-PB.2954.123,FB-PB.2954.63,FB-PB.2954.167,FB-PB.2954.69,FB-PB.2954.171,FB-PB.2954.1,FB-PB.2954.39,FB-PB.2954.126,FB-PB.2954.79,FB-PB.2954.119,FB-PB.2954.88,FB-PB.2954.29,FB-PB.2954.109,FB-PB.2954.2,FB-PB.2954.116,FB-PB.2954.17,FB-PB.2954.129,FB-PB.2954.105,FB-PB.2954.120,FB-PB.2954.142,FB-PB.2954.114,FB-PB.2954.107,FB-PB.2954.31,FB-PB.2954.153,FB-PB.29…
chr2	FB-PB.2954	FN1	SE	FB-PB.2954;SE:chr2:215379317-215380811:215381080-215382212:-	0.515594	0	Up	FB-PB.2954.73	FB-PB.2954.47,FB-PB.2954.164,FB-PB.2954.76,FB-PB.2954.123,FB-PB.2954.63,FB-PB.2954.167,FB-PB.2954.69,FB-PB.2954.171,FB-PB.2954.1,FB-PB.2954.39,FB-PB.2954.126,FB-PB.2954.79,FB-PB.2954.119,FB-PB.2954.88,FB-PB.2954.29,FB-PB.2954.109,FB-PB.2954.2,FB-PB.2954.116,FB-PB.2954.17,FB-PB.2954.129,FB-PB.2954.105,FB-PB.2954.120,FB-PB.2954.142,FB-PB.2954.114,FB-PB.2954.107,FB-PB.2954.31,FB-PB.2954.153,FB-PB.29…
chr2	FB-PB.2954	FN1	SE	FB-PB.2954;SE:chr2:215379317-215380811:215381080-215382212:-	0.515594	0	Up	FB-PB.2954.74	FB-PB.2954.47,FB-PB.2954.164,FB-PB.2954.76,FB-PB.2954.123,FB-PB.2954.63,FB-PB.2954.167,FB-PB.2954.69,FB-PB.2954.171,FB-PB.2954.1,FB-PB.2954.39,FB-PB.2954.126,FB-PB.2954.79,FB-PB.2954.119,FB-PB.2954.88,FB-PB.2954.29,FB-PB.2954.109,FB-PB.2954.2,FB-PB.2954.116,FB-PB.2954.17,FB-PB.2954.129,FB-PB.2954.105,FB-PB.2954.120,FB-PB.2954.142,FB-PB.2954.114,FB-PB.2954.107,FB-PB.2954.31,FB-PB.2954.153,FB-PB.29…
chr2	FB-PB.2954	FN1	SE	FB-PB.2954;SE:chr2:215379317-215380811:215381080-215382212:-	0.515594	0	Up	FB-PB.2954.72	FB-PB.2954.47,FB-PB.2954.164,FB-PB.2954.76,FB-PB.2954.123,FB-PB.2954.63,FB-PB.2954.167,FB-PB.2954.69,FB-PB.2954.171,FB-PB.2954.1,FB-PB.2954.39,FB-PB.2954.126,FB-PB.2954.79,FB-PB.2954.119,FB-PB.2954.88,FB-PB.2954.29,FB-PB.2954.109,FB-PB.2954.2,FB-PB.2954.116,FB-PB.2954.17,FB-PB.2954.129,FB-PB.2954.105,FB-PB.2954.120,FB-PB.2954.142,FB-PB.2954.114,FB-PB.2954.107,FB-PB.2954.31,FB-PB.2954.153,FB-PB.29…
chr2	FB-PB.2954	FN1	SE	FB-PB.2954;SE:chr2:215379317-215380811:215381080-215382212:-	0.515594	0	Up	FB-PB.2954.68	FB-PB.2954.47,FB-PB.2954.164,FB-PB.2954.76,FB-PB.2954.123,FB-PB.2954.63,FB-PB.2954.167,FB-PB.2954.69,FB-PB.2954.171,FB-PB.2954.1,FB-PB.2954.39,FB-PB.2954.126,FB-PB.2954.79,FB-PB.2954.119,FB-PB.2954.88,FB-PB.2954.29,FB-PB.2954.109,FB-PB.2954.2,FB-PB.2954.116,FB-PB.2954.17,FB-PB.2954.129,FB-PB.2954.105,FB-PB.2954.120,FB-PB.2954.142,FB-PB.2954.114,FB-PB.2954.107,FB-PB.2954.31,FB-PB.2954.153,FB-PB.29…
chr2	FB-PB.2954	FN1	SE	FB-PB.2954;SE:chr2:215379317-215380811:215381080-215382212:-	0.515594	0	Up	FB-PB.2954.63	FB-PB.2954.47,FB-PB.2954.164,FB-PB.2954.76,FB-PB.2954.123,FB-PB.2954.63,FB-PB.2954.167,FB-PB.2954.69,FB-PB.2954.171,FB-PB.2954.1,FB-PB.2954.39,FB-PB.2954.126,FB-PB.2954.79,FB-PB.2954.119,FB-PB.2954.88,FB-PB.2954.29,FB-PB.2954.109,FB-PB.2954.2,FB-PB.2954.116,FB-PB.2954.17,FB-PB.2954.129,FB-PB.2954.105,FB-PB.2954.120,FB-PB.2954.142,FB-PB.2954.114,FB-PB.2954.107,FB-PB.2954.31,FB-PB.2954.153,FB-PB.29…
chr2	FB-PB.2954	FN1	SE	FB-PB.2954;SE:chr2:215379317-215380811:215381080-215382212:-	0.515594	0	Up	FB-PB.2954.64	FB-PB.2954.47,FB-PB.2954.164,FB-PB.2954.76,FB-PB.2954.123,FB-PB.2954.63,FB-PB.2954.167,FB-PB.2954.69,FB-PB.2954.171,FB-PB.2954.1,FB-PB.2954.39,FB-PB.2954.126,FB-PB.2954.79,FB-PB.2954.119,FB-PB.2954.88,FB-PB.2954.29,FB-PB.2954.109,FB-PB.2954.2,FB-PB.2954.116,FB-PB.2954.17,FB-PB.2954.129,FB-PB.2954.105,FB-PB.2954.120,FB-PB.2954.142,FB-PB.2954.114,FB-PB.2954.107,FB-PB.2954.31,FB-PB.2954.153,FB-PB.29…
chr2	FB-PB.2954	FN1	SE	FB-PB.2954;SE:chr2:215379317-215380811:215381080-215382212:-	0.515594	0	Up	FB-PB.2954.65	FB-PB.2954.47,FB-PB.2954.164,FB-PB.2954.76,FB-PB.2954.123,FB-PB.2954.63,FB-PB.2954.167,FB-PB.2954.69,FB-PB.2954.171,FB-PB.2954.1,FB-PB.2954.39,FB-PB.2954.126,FB-PB.2954.79,FB-PB.2954.119,FB-PB.2954.88,FB-PB.2954.29,FB-PB.2954.109,FB-PB.2954.2,FB-PB.2954.116,FB-PB.2954.17,FB-PB.2954.129,FB-PB.2954.105,FB-PB.2954.120,FB-PB.2954.142,FB-PB.2954.114,FB-PB.2954.107,FB-PB.2954.31,FB-PB.2954.153,FB-PB.29…
chr2	FB-PB.2954	FN1	SE	FB-PB.2954;SE:chr2:215379317-215380811:215381080-215382212:-	0.515594	0	Up	FB-PB.2954.55	FB-PB.2954.47,FB-PB.2954.164,FB-PB.2954.76,FB-PB.2954.123,FB-PB.2954.63,FB-PB.2954.167,FB-PB.2954.69,FB-PB.2954.171,FB-PB.2954.1,FB-PB.2954.39,FB-PB.2954.126,FB-PB.2954.79,FB-PB.2954.119,FB-PB.2954.88,FB-PB.2954.29,FB-PB.2954.109,FB-PB.2954.2,FB-PB.2954.116,FB-PB.2954.17,FB-PB.2954.129,FB-PB.2954.105,FB-PB.2954.120,FB-PB.2954.142,FB-PB.2954.114,FB-PB.2954.107,FB-PB.2954.31,FB-PB.2954.153,FB-PB.29…
chr2	FB-PB.2954	FN1	SE	FB-PB.2954;SE:chr2:215379317-215380811:215381080-215382212:-	0.515594	0	Up	FB-PB.2954.56	FB-PB.2954.47,FB-PB.2954.164,FB-PB.2954.76,FB-PB.2954.123,FB-PB.2954.63,FB-PB.2954.167,FB-PB.2954.69,FB-PB.2954.171,FB-PB.2954.1,FB-PB.2954.39,FB-PB.2954.126,FB-PB.2954.79,FB-PB.2954.119,FB-PB.2954.88,FB-PB.2954.29,FB-PB.2954.109,FB-PB.2954.2,FB-PB.2954.116,FB-PB.2954.17,FB-PB.2954.129,FB-PB.2954.105,FB-PB.2954.120,FB-PB.2954.142,FB-PB.2954.114,FB-PB.2954.107,FB-PB.2954.31,FB-PB.2954.153,FB-PB.29…
chr2	FB-PB.2954	FN1	SE	FB-PB.2954;SE:chr2:215379317-215380811:215381080-215382212:-	0.515594	0	Up	FB-PB.2954.57	FB-PB.2954.47,FB-PB.2954.164,FB-PB.2954.76,FB-PB.2954.123,FB-PB.2954.63,FB-PB.2954.167,FB-PB.2954.69,FB-PB.2954.171,FB-PB.2954.1,FB-PB.2954.39,FB-PB.2954.126,FB-PB.2954.79,FB-PB.2954.119,FB-PB.2954.88,FB-PB.2954.29,FB-PB.2954.109,FB-PB.2954.2,FB-PB.2954.116,FB-PB.2954.17,FB-PB.2954.129,FB-PB.2954.105,FB-PB.2954.120,FB-PB.2954.142,FB-PB.2954.114,FB-PB.2954.107,FB-PB.2954.31,FB-PB.2954.153,FB-PB.29…
chr2	FB-PB.2954	FN1	SE	FB-PB.2954;SE:chr2:215379317-215380811:215381080-215382212:-	0.515594	0	Up	FB-PB.2954.28	FB-PB.2954.47,FB-PB.2954.164,FB-PB.2954.76,FB-PB.2954.123,FB-PB.2954.63,FB-PB.2954.167,FB-PB.2954.69,FB-PB.2954.171,FB-PB.2954.1,FB-PB.2954.39,FB-PB.2954.126,FB-PB.2954.79,FB-PB.2954.119,FB-PB.2954.88,FB-PB.2954.29,FB-PB.2954.109,FB-PB.2954.2,FB-PB.2954.116,FB-PB.2954.17,FB-PB.2954.129,FB-PB.2954.105,FB-PB.2954.120,FB-PB.2954.142,FB-PB.2954.114,FB-PB.2954.107,FB-PB.2954.31,FB-PB.2954.153,FB-PB.29…
chr2	FB-PB.2954	FN1	SE	FB-PB.2954;SE:chr2:215379317-215380811:215381080-215382212:-	0.515594	0	Up	FB-PB.2954.27	FB-PB.2954.47,FB-PB.2954.164,FB-PB.2954.76,FB-PB.2954.123,FB-PB.2954.63,FB-PB.2954.167,FB-PB.2954.69,FB-PB.2954.171,FB-PB.2954.1,FB-PB.2954.39,FB-PB.2954.126,FB-PB.2954.79,FB-PB.2954.119,FB-PB.2954.88,FB-PB.2954.29,FB-PB.2954.109,FB-PB.2954.2,FB-PB.2954.116,FB-PB.2954.17,FB-PB.2954.129,FB-PB.2954.105,FB-PB.2954.120,FB-PB.2954.142,FB-PB.2954.114,FB-PB.2954.107,FB-PB.2954.31,FB-PB.2954.153,FB-PB.29…
chr2	FB-PB.2954	FN1	SE	FB-PB.2954;SE:chr2:215379317-215380811:215381080-215382212:-	0.515594	0	Up	FB-PB.2954.20	FB-PB.2954.47,FB-PB.2954.164,FB-PB.2954.76,FB-PB.2954.123,FB-PB.2954.63,FB-PB.2954.167,FB-PB.2954.69,FB-PB.2954.171,FB-PB.2954.1,FB-PB.2954.39,FB-PB.2954.126,FB-PB.2954.79,FB-PB.2954.119,FB-PB.2954.88,FB-PB.2954.29,FB-PB.2954.109,FB-PB.2954.2,FB-PB.2954.116,FB-PB.2954.17,FB-PB.2954.129,FB-PB.2954.105,FB-PB.2954.120,FB-PB.2954.142,FB-PB.2954.114,FB-PB.2954.107,FB-PB.2954.31,FB-PB.2954.153,FB-PB.29…
chr2	FB-PB.2954	FN1	SE	FB-PB.2954;SE:chr2:215379317-215380811:215381080-215382212:-	0.515594	0	Up	FB-PB.2954.25	FB-PB.2954.47,FB-PB.2954.164,FB-PB.2954.76,FB-PB.2954.123,FB-PB.2954.63,FB-PB.2954.167,FB-PB.2954.69,FB-PB.2954.171,FB-PB.2954.1,FB-PB.2954.39,FB-PB.2954.126,FB-PB.2954.79,FB-PB.2954.119,FB-PB.2954.88,FB-PB.2954.29,FB-PB.2954.109,FB-PB.2954.2,FB-PB.2954.116,FB-PB.2954.17,FB-PB.2954.129,FB-PB.2954.105,FB-PB.2954.120,FB-PB.2954.142,FB-PB.2954.114,FB-PB.2954.107,FB-PB.2954.31,FB-PB.2954.153,FB-PB.29…
chr2	FB-PB.2954	FN1	SE	FB-PB.2954;SE:chr2:215379317-215380811:215381080-215382212:-	0.515594	0	Up	FB-PB.2954.29	FB-PB.2954.47,FB-PB.2954.164,FB-PB.2954.76,FB-PB.2954.123,FB-PB.2954.63,FB-PB.2954.167,FB-PB.2954.69,FB-PB.2954.171,FB-PB.2954.1,FB-PB.2954.39,FB-PB.2954.126,FB-PB.2954.79,FB-PB.2954.119,FB-PB.2954.88,FB-PB.2954.29,FB-PB.2954.109,FB-PB.2954.2,FB-PB.2954.116,FB-PB.2954.17,FB-PB.2954.129,FB-PB.2954.105,FB-PB.2954.120,FB-PB.2954.142,FB-PB.2954.114,FB-PB.2954.107,FB-PB.2954.31,FB-PB.2954.153,FB-PB.29…
chr2	FB-PB.2954	FN1	SE	FB-PB.2954;SE:chr2:215379317-215380811:215381080-215382212:-	0.515594	0	Up	FB-PB.2954.44	FB-PB.2954.47,FB-PB.2954.164,FB-PB.2954.76,FB-PB.2954.123,FB-PB.2954.63,FB-PB.2954.167,FB-PB.2954.69,FB-PB.2954.171,FB-PB.2954.1,FB-PB.2954.39,FB-PB.2954.126,FB-PB.2954.79,FB-PB.2954.119,FB-PB.2954.88,FB-PB.2954.29,FB-PB.2954.109,FB-PB.2954.2,FB-PB.2954.116,FB-PB.2954.17,FB-PB.2954.129,FB-PB.2954.105,FB-PB.2954.120,FB-PB.2954.142,FB-PB.2954.114,FB-PB.2954.107,FB-PB.2954.31,FB-PB.2954.153,FB-PB.29…
chr2	FB-PB.2954	FN1	SE	FB-PB.2954;SE:chr2:215379317-215380811:215381080-215382212:-	0.515594	0	Up	FB-PB.2954.24	FB-PB.2954.47,FB-PB.2954.164,FB-PB.2954.76,FB-PB.2954.123,FB-PB.2954.63,FB-PB.2954.167,FB-PB.2954.69,FB-PB.2954.171,FB-PB.2954.1,FB-PB.2954.39,FB-PB.2954.126,FB-PB.2954.79,FB-PB.2954.119,FB-PB.2954.88,FB-PB.2954.29,FB-PB.2954.109,FB-PB.2954.2,FB-PB.2954.116,FB-PB.2954.17,FB-PB.2954.129,FB-PB.2954.105,FB-PB.2954.120,FB-PB.2954.142,FB-PB.2954.114,FB-PB.2954.107,FB-PB.2954.31,FB-PB.2954.153,FB-PB.29…
chr2	FB-PB.2954	FN1	SE	FB-PB.2954;SE:chr2:215379317-215380811:215381080-215382212:-	0.515594	0	Up	FB-PB.2954.43	FB-PB.2954.47,FB-PB.2954.164,FB-PB.2954.76,FB-PB.2954.123,FB-PB.2954.63,FB-PB.2954.167,FB-PB.2954.69,FB-PB.2954.171,FB-PB.2954.1,FB-PB.2954.39,FB-PB.2954.126,FB-PB.2954.79,FB-PB.2954.119,FB-PB.2954.88,FB-PB.2954.29,FB-PB.2954.109,FB-PB.2954.2,FB-PB.2954.116,FB-PB.2954.17,FB-PB.2954.129,FB-PB.2954.105,FB-PB.2954.120,FB-PB.2954.142,FB-PB.2954.114,FB-PB.2954.107,FB-PB.2954.31,FB-PB.2954.153,FB-PB.29…
chr2	FB-PB.2954	FN1	SE	FB-PB.2954;SE:chr2:215379317-215380811:215381080-215382212:-	0.515594	0	Up	FB-PB.2954.49	FB-PB.2954.47,FB-PB.2954.164,FB-PB.2954.76,FB-PB.2954.123,FB-PB.2954.63,FB-PB.2954.167,FB-PB.2954.69,FB-PB.2954.171,FB-PB.2954.1,FB-PB.2954.39,FB-PB.2954.126,FB-PB.2954.79,FB-PB.2954.119,FB-PB.2954.88,FB-PB.2954.29,FB-PB.2954.109,FB-PB.2954.2,FB-PB.2954.116,FB-PB.2954.17,FB-PB.2954.129,FB-PB.2954.105,FB-PB.2954.120,FB-PB.2954.142,FB-PB.2954.114,FB-PB.2954.107,FB-PB.2954.31,FB-PB.2954.153,FB-PB.29…
chr2	FB-PB.2954	FN1	SE	FB-PB.2954;SE:chr2:215379317-215380811:215381080-215382212:-	0.515594	0	Up	FB-PB.2954.47	FB-PB.2954.47,FB-PB.2954.164,FB-PB.2954.76,FB-PB.2954.123,FB-PB.2954.63,FB-PB.2954.167,FB-PB.2954.69,FB-PB.2954.171,FB-PB.2954.1,FB-PB.2954.39,FB-PB.2954.126,FB-PB.2954.79,FB-PB.2954.119,FB-PB.2954.88,FB-PB.2954.29,FB-PB.2954.109,FB-PB.2954.2,FB-PB.2954.116,FB-PB.2954.17,FB-PB.2954.129,FB-PB.2954.105,FB-PB.2954.120,FB-PB.2954.142,FB-PB.2954.114,FB-PB.2954.107,FB-PB.2954.31,FB-PB.2954.153,FB-PB.29…
chr2	FB-PB.2954	FN1	SE	FB-PB.2954;SE:chr2:215379317-215380811:215381080-215382212:-	0.515594	0	Up	FB-PB.2954.38	FB-PB.2954.47,FB-PB.2954.164,FB-PB.2954.76,FB-PB.2954.123,FB-PB.2954.63,FB-PB.2954.167,FB-PB.2954.69,FB-PB.2954.171,FB-PB.2954.1,FB-PB.2954.39,FB-PB.2954.126,FB-PB.2954.79,FB-PB.2954.119,FB-PB.2954.88,FB-PB.2954.29,FB-PB.2954.109,FB-PB.2954.2,FB-PB.2954.116,FB-PB.2954.17,FB-PB.2954.129,FB-PB.2954.105,FB-PB.2954.120,FB-PB.2954.142,FB-PB.2954.114,FB-PB.2954.107,FB-PB.2954.31,FB-PB.2954.153,FB-PB.29…
chr2	FB-PB.2954	FN1	SE	FB-PB.2954;SE:chr2:215379317-215380811:215381080-215382212:-	0.515594	0	Up	FB-PB.2954.14	FB-PB.2954.47,FB-PB.2954.164,FB-PB.2954.76,FB-PB.2954.123,FB-PB.2954.63,FB-PB.2954.167,FB-PB.2954.69,FB-PB.2954.171,FB-PB.2954.1,FB-PB.2954.39,FB-PB.2954.126,FB-PB.2954.79,FB-PB.2954.119,FB-PB.2954.88,FB-PB.2954.29,FB-PB.2954.109,FB-PB.2954.2,FB-PB.2954.116,FB-PB.2954.17,FB-PB.2954.129,FB-PB.2954.105,FB-PB.2954.120,FB-PB.2954.142,FB-PB.2954.114,FB-PB.2954.107,FB-PB.2954.31,FB-PB.2954.153,FB-PB.29…
chr2	FB-PB.2954	FN1	SE	FB-PB.2954;SE:chr2:215379317-215380811:215381080-215382212:-	0.515594	0	Up	FB-PB.2954.30	FB-PB.2954.47,FB-PB.2954.164,FB-PB.2954.76,FB-PB.2954.123,FB-PB.2954.63,FB-PB.2954.167,FB-PB.2954.69,FB-PB.2954.171,FB-PB.2954.1,FB-PB.2954.39,FB-PB.2954.126,FB-PB.2954.79,FB-PB.2954.119,FB-PB.2954.88,FB-PB.2954.29,FB-PB.2954.109,FB-PB.2954.2,FB-PB.2954.116,FB-PB.2954.17,FB-PB.2954.129,FB-PB.2954.105,FB-PB.2954.120,FB-PB.2954.142,FB-PB.2954.114,FB-PB.2954.107,FB-PB.2954.31,FB-PB.2954.153,FB-PB.29…
chr2	FB-PB.2954	FN1	SE	FB-PB.2954;SE:chr2:215379317-215380811:215381080-215382212:-	0.515594	0	Up	FB-PB.2954.33	FB-PB.2954.47,FB-PB.2954.164,FB-PB.2954.76,FB-PB.2954.123,FB-PB.2954.63,FB-PB.2954.167,FB-PB.2954.69,FB-PB.2954.171,FB-PB.2954.1,FB-PB.2954.39,FB-PB.2954.126,FB-PB.2954.79,FB-PB.2954.119,FB-PB.2954.88,FB-PB.2954.29,FB-PB.2954.109,FB-PB.2954.2,FB-PB.2954.116,FB-PB.2954.17,FB-PB.2954.129,FB-PB.2954.105,FB-PB.2954.120,FB-PB.2954.142,FB-PB.2954.114,FB-PB.2954.107,FB-PB.2954.31,FB-PB.2954.153,FB-PB.29…
chr2	FB-PB.2954	FN1	SE	FB-PB.2954;SE:chr2:215379317-215380811:215381080-215382212:-	0.515594	0	Up	FB-PB.2954.80	FB-PB.2954.47,FB-PB.2954.164,FB-PB.2954.76,FB-PB.2954.123,FB-PB.2954.63,FB-PB.2954.167,FB-PB.2954.69,FB-PB.2954.171,FB-PB.2954.1,FB-PB.2954.39,FB-PB.2954.126,FB-PB.2954.79,FB-PB.2954.119,FB-PB.2954.88,FB-PB.2954.29,FB-PB.2954.109,FB-PB.2954.2,FB-PB.2954.116,FB-PB.2954.17,FB-PB.2954.129,FB-PB.2954.105,FB-PB.2954.120,FB-PB.2954.142,FB-PB.2954.114,FB-PB.2954.107,FB-PB.2954.31,FB-PB.2954.153,FB-PB.29…
chr2	FB-PB.2954	FN1	SE	FB-PB.2954;SE:chr2:215379317-215380811:215381080-215382212:-	0.515594	0	Up	FB-PB.2954.81	FB-PB.2954.47,FB-PB.2954.164,FB-PB.2954.76,FB-PB.2954.123,FB-PB.2954.63,FB-PB.2954.167,FB-PB.2954.69,FB-PB.2954.171,FB-PB.2954.1,FB-PB.2954.39,FB-PB.2954.126,FB-PB.2954.79,FB-PB.2954.119,FB-PB.2954.88,FB-PB.2954.29,FB-PB.2954.109,FB-PB.2954.2,FB-PB.2954.116,FB-PB.2954.17,FB-PB.2954.129,FB-PB.2954.105,FB-PB.2954.120,FB-PB.2954.142,FB-PB.2954.114,FB-PB.2954.107,FB-PB.2954.31,FB-PB.2954.153,FB-PB.29…
chr2	FB-PB.2954	FN1	SE	FB-PB.2954;SE:chr2:215379317-215380811:215381080-215382212:-	0.515594	0	Up	FB-PB.2954.83	FB-PB.2954.47,FB-PB.2954.164,FB-PB.2954.76,FB-PB.2954.123,FB-PB.2954.63,FB-PB.2954.167,FB-PB.2954.69,FB-PB.2954.171,FB-PB.2954.1,FB-PB.2954.39,FB-PB.2954.126,FB-PB.2954.79,FB-PB.2954.119,FB-PB.2954.88,FB-PB.2954.29,FB-PB.2954.109,FB-PB.2954.2,FB-PB.2954.116,FB-PB.2954.17,FB-PB.2954.129,FB-PB.2954.105,FB-PB.2954.120,FB-PB.2954.142,FB-PB.2954.114,FB-PB.2954.107,FB-PB.2954.31,FB-PB.2954.153,FB-PB.29…
chr2	FB-PB.2954	FN1	SE	FB-PB.2954;SE:chr2:215379317-215380811:215381080-215382212:-	0.515594	0	Up	FB-PB.2954.17	FB-PB.2954.47,FB-PB.2954.164,FB-PB.2954.76,FB-PB.2954.123,FB-PB.2954.63,FB-PB.2954.167,FB-PB.2954.69,FB-PB.2954.171,FB-PB.2954.1,FB-PB.2954.39,FB-PB.2954.126,FB-PB.2954.79,FB-PB.2954.119,FB-PB.2954.88,FB-PB.2954.29,FB-PB.2954.109,FB-PB.2954.2,FB-PB.2954.116,FB-PB.2954.17,FB-PB.2954.129,FB-PB.2954.105,FB-PB.2954.120,FB-PB.2954.142,FB-PB.2954.114,FB-PB.2954.107,FB-PB.2954.31,FB-PB.2954.153,FB-PB.29…
chr2	FB-PB.2954	FN1	SE	FB-PB.2954;SE:chr2:215379317-215380811:215381080-215382212:-	0.515594	0	Up	FB-PB.2954.149	FB-PB.2954.47,FB-PB.2954.164,FB-PB.2954.76,FB-PB.2954.123,FB-PB.2954.63,FB-PB.2954.167,FB-PB.2954.69,FB-PB.2954.171,FB-PB.2954.1,FB-PB.2954.39,FB-PB.2954.126,FB-PB.2954.79,FB-PB.2954.119,FB-PB.2954.88,FB-PB.2954.29,FB-PB.2954.109,FB-PB.2954.2,FB-PB.2954.116,FB-PB.2954.17,FB-PB.2954.129,FB-PB.2954.105,FB-PB.2954.120,FB-PB.2954.142,FB-PB.2954.114,FB-PB.2954.107,FB-PB.2954.31,FB-PB.2954.153,FB-PB.29…
chr2	FB-PB.2954	FN1	SE	FB-PB.2954;SE:chr2:215379317-215380811:215381080-215382212:-	0.515594	0	Up	FB-PB.2954.146	FB-PB.2954.47,FB-PB.2954.164,FB-PB.2954.76,FB-PB.2954.123,FB-PB.2954.63,FB-PB.2954.167,FB-PB.2954.69,FB-PB.2954.171,FB-PB.2954.1,FB-PB.2954.39,FB-PB.2954.126,FB-PB.2954.79,FB-PB.2954.119,FB-PB.2954.88,FB-PB.2954.29,FB-PB.2954.109,FB-PB.2954.2,FB-PB.2954.116,FB-PB.2954.17,FB-PB.2954.129,FB-PB.2954.105,FB-PB.2954.120,FB-PB.2954.142,FB-PB.2954.114,FB-PB.2954.107,FB-PB.2954.31,FB-PB.2954.153,FB-PB.29…
chr2	FB-PB.2954	FN1	SE	FB-PB.2954;SE:chr2:215379317-215380811:215381080-215382212:-	0.515594	0	Up	FB-PB.2954.144	FB-PB.2954.47,FB-PB.2954.164,FB-PB.2954.76,FB-PB.2954.123,FB-PB.2954.63,FB-PB.2954.167,FB-PB.2954.69,FB-PB.2954.171,FB-PB.2954.1,FB-PB.2954.39,FB-PB.2954.126,FB-PB.2954.79,FB-PB.2954.119,FB-PB.2954.88,FB-PB.2954.29,FB-PB.2954.109,FB-PB.2954.2,FB-PB.2954.116,FB-PB.2954.17,FB-PB.2954.129,FB-PB.2954.105,FB-PB.2954.120,FB-PB.2954.142,FB-PB.2954.114,FB-PB.2954.107,FB-PB.2954.31,FB-PB.2954.153,FB-PB.29…
chr2	FB-PB.2954	FN1	SE	FB-PB.2954;SE:chr2:215379317-215380811:215381080-215382212:-	0.515594	0	Up	FB-PB.2954.150	FB-PB.2954.47,FB-PB.2954.164,FB-PB.2954.76,FB-PB.2954.123,FB-PB.2954.63,FB-PB.2954.167,FB-PB.2954.69,FB-PB.2954.171,FB-PB.2954.1,FB-PB.2954.39,FB-PB.2954.126,FB-PB.2954.79,FB-PB.2954.119,FB-PB.2954.88,FB-PB.2954.29,FB-PB.2954.109,FB-PB.2954.2,FB-PB.2954.116,FB-PB.2954.17,FB-PB.2954.129,FB-PB.2954.105,FB-PB.2954.120,FB-PB.2954.142,FB-PB.2954.114,FB-PB.2954.107,FB-PB.2954.31,FB-PB.2954.153,FB-PB.29…
chr2	FB-PB.2954	FN1	SE	FB-PB.2954;SE:chr2:215379317-215380811:215381080-215382212:-	0.515594	0	Up	FB-PB.2954.142	FB-PB.2954.47,FB-PB.2954.164,FB-PB.2954.76,FB-PB.2954.123,FB-PB.2954.63,FB-PB.2954.167,FB-PB.2954.69,FB-PB.2954.171,FB-PB.2954.1,FB-PB.2954.39,FB-PB.2954.126,FB-PB.2954.79,FB-PB.2954.119,FB-PB.2954.88,FB-PB.2954.29,FB-PB.2954.109,FB-PB.2954.2,FB-PB.2954.116,FB-PB.2954.17,FB-PB.2954.129,FB-PB.2954.105,FB-PB.2954.120,FB-PB.2954.142,FB-PB.2954.114,FB-PB.2954.107,FB-PB.2954.31,FB-PB.2954.153,FB-PB.29…
chr2	FB-PB.2954	FN1	SE	FB-PB.2954;SE:chr2:215379317-215380811:215381080-215382212:-	0.515594	0	Up	FB-PB.2954.143	FB-PB.2954.47,FB-PB.2954.164,FB-PB.2954.76,FB-PB.2954.123,FB-PB.2954.63,FB-PB.2954.167,FB-PB.2954.69,FB-PB.2954.171,FB-PB.2954.1,FB-PB.2954.39,FB-PB.2954.126,FB-PB.2954.79,FB-PB.2954.119,FB-PB.2954.88,FB-PB.2954.29,FB-PB.2954.109,FB-PB.2954.2,FB-PB.2954.116,FB-PB.2954.17,FB-PB.2954.129,FB-PB.2954.105,FB-PB.2954.120,FB-PB.2954.142,FB-PB.2954.114,FB-PB.2954.107,FB-PB.2954.31,FB-PB.2954.153,FB-PB.29…
chr2	FB-PB.2954	FN1	SE	FB-PB.2954;SE:chr2:215379317-215380811:215381080-215382212:-	0.515594	0	Up	FB-PB.2954.141	FB-PB.2954.47,FB-PB.2954.164,FB-PB.2954.76,FB-PB.2954.123,FB-PB.2954.63,FB-PB.2954.167,FB-PB.2954.69,FB-PB.2954.171,FB-PB.2954.1,FB-PB.2954.39,FB-PB.2954.126,FB-PB.2954.79,FB-PB.2954.119,FB-PB.2954.88,FB-PB.2954.29,FB-PB.2954.109,FB-PB.2954.2,FB-PB.2954.116,FB-PB.2954.17,FB-PB.2954.129,FB-PB.2954.105,FB-PB.2954.120,FB-PB.2954.142,FB-PB.2954.114,FB-PB.2954.107,FB-PB.2954.31,FB-PB.2954.153,FB-PB.29…
chr2	FB-PB.2954	FN1	SE	FB-PB.2954;SE:chr2:215379317-215380811:215381080-215382212:-	0.515594	0	Up	FB-PB.2954.139	FB-PB.2954.47,FB-PB.2954.164,FB-PB.2954.76,FB-PB.2954.123,FB-PB.2954.63,FB-PB.2954.167,FB-PB.2954.69,FB-PB.2954.171,FB-PB.2954.1,FB-PB.2954.39,FB-PB.2954.126,FB-PB.2954.79,FB-PB.2954.119,FB-PB.2954.88,FB-PB.2954.29,FB-PB.2954.109,FB-PB.2954.2,FB-PB.2954.116,FB-PB.2954.17,FB-PB.2954.129,FB-PB.2954.105,FB-PB.2954.120,FB-PB.2954.142,FB-PB.2954.114,FB-PB.2954.107,FB-PB.2954.31,FB-PB.2954.153,FB-PB.29…
chr2	FB-PB.2954	FN1	SE	FB-PB.2954;SE:chr2:215379317-215380811:215381080-215382212:-	0.515594	0	Up	FB-PB.2954.135	FB-PB.2954.47,FB-PB.2954.164,FB-PB.2954.76,FB-PB.2954.123,FB-PB.2954.63,FB-PB.2954.167,FB-PB.2954.69,FB-PB.2954.171,FB-PB.2954.1,FB-PB.2954.39,FB-PB.2954.126,FB-PB.2954.79,FB-PB.2954.119,FB-PB.2954.88,FB-PB.2954.29,FB-PB.2954.109,FB-PB.2954.2,FB-PB.2954.116,FB-PB.2954.17,FB-PB.2954.129,FB-PB.2954.105,FB-PB.2954.120,FB-PB.2954.142,FB-PB.2954.114,FB-PB.2954.107,FB-PB.2954.31,FB-PB.2954.153,FB-PB.29…
chr2	FB-PB.2954	FN1	SE	FB-PB.2954;SE:chr2:215379317-215380811:215381080-215382212:-	0.515594	0	Up	FB-PB.2954.137	FB-PB.2954.47,FB-PB.2954.164,FB-PB.2954.76,FB-PB.2954.123,FB-PB.2954.63,FB-PB.2954.167,FB-PB.2954.69,FB-PB.2954.171,FB-PB.2954.1,FB-PB.2954.39,FB-PB.2954.126,FB-PB.2954.79,FB-PB.2954.119,FB-PB.2954.88,FB-PB.2954.29,FB-PB.2954.109,FB-PB.2954.2,FB-PB.2954.116,FB-PB.2954.17,FB-PB.2954.129,FB-PB.2954.105,FB-PB.2954.120,FB-PB.2954.142,FB-PB.2954.114,FB-PB.2954.107,FB-PB.2954.31,FB-PB.2954.153,FB-PB.29…
chr2	FB-PB.2954	FN1	SE	FB-PB.2954;SE:chr2:215379317-215380811:215381080-215382212:-	0.515594	0	Up	FB-PB.2954.138	FB-PB.2954.47,FB-PB.2954.164,FB-PB.2954.76,FB-PB.2954.123,FB-PB.2954.63,FB-PB.2954.167,FB-PB.2954.69,FB-PB.2954.171,FB-PB.2954.1,FB-PB.2954.39,FB-PB.2954.126,FB-PB.2954.79,FB-PB.2954.119,FB-PB.2954.88,FB-PB.2954.29,FB-PB.2954.109,FB-PB.2954.2,FB-PB.2954.116,FB-PB.2954.17,FB-PB.2954.129,FB-PB.2954.105,FB-PB.2954.120,FB-PB.2954.142,FB-PB.2954.114,FB-PB.2954.107,FB-PB.2954.31,FB-PB.2954.153,FB-PB.29…
chr2	FB-PB.2954	FN1	SE	FB-PB.2954;SE:chr2:215379317-215380811:215381080-215382212:-	0.515594	0	Up	FB-PB.2954.134	FB-PB.2954.47,FB-PB.2954.164,FB-PB.2954.76,FB-PB.2954.123,FB-PB.2954.63,FB-PB.2954.167,FB-PB.2954.69,FB-PB.2954.171,FB-PB.2954.1,FB-PB.2954.39,FB-PB.2954.126,FB-PB.2954.79,FB-PB.2954.119,FB-PB.2954.88,FB-PB.2954.29,FB-PB.2954.109,FB-PB.2954.2,FB-PB.2954.116,FB-PB.2954.17,FB-PB.2954.129,FB-PB.2954.105,FB-PB.2954.120,FB-PB.2954.142,FB-PB.2954.114,FB-PB.2954.107,FB-PB.2954.31,FB-PB.2954.153,FB-PB.29…
chr2	FB-PB.2954	FN1	SE	FB-PB.2954;SE:chr2:215379317-215380811:215381080-215382212:-	0.515594	0	Up	FB-PB.2954.132	FB-PB.2954.47,FB-PB.2954.164,FB-PB.2954.76,FB-PB.2954.123,FB-PB.2954.63,FB-PB.2954.167,FB-PB.2954.69,FB-PB.2954.171,FB-PB.2954.1,FB-PB.2954.39,FB-PB.2954.126,FB-PB.2954.79,FB-PB.2954.119,FB-PB.2954.88,FB-PB.2954.29,FB-PB.2954.109,FB-PB.2954.2,FB-PB.2954.116,FB-PB.2954.17,FB-PB.2954.129,FB-PB.2954.105,FB-PB.2954.120,FB-PB.2954.142,FB-PB.2954.114,FB-PB.2954.107,FB-PB.2954.31,FB-PB.2954.153,FB-PB.29…
chr2	FB-PB.2954	FN1	SE	FB-PB.2954;SE:chr2:215379317-215380811:215381080-215382212:-	0.515594	0	Up	FB-PB.2954.122	FB-PB.2954.47,FB-PB.2954.164,FB-PB.2954.76,FB-PB.2954.123,FB-PB.2954.63,FB-PB.2954.167,FB-PB.2954.69,FB-PB.2954.171,FB-PB.2954.1,FB-PB.2954.39,FB-PB.2954.126,FB-PB.2954.79,FB-PB.2954.119,FB-PB.2954.88,FB-PB.2954.29,FB-PB.2954.109,FB-PB.2954.2,FB-PB.2954.116,FB-PB.2954.17,FB-PB.2954.129,FB-PB.2954.105,FB-PB.2954.120,FB-PB.2954.142,FB-PB.2954.114,FB-PB.2954.107,FB-PB.2954.31,FB-PB.2954.153,FB-PB.29…
chr2	FB-PB.2954	FN1	SE	FB-PB.2954;SE:chr2:215379317-215380811:215381080-215382212:-	0.515594	0	Up	FB-PB.2954.131	FB-PB.2954.47,FB-PB.2954.164,FB-PB.2954.76,FB-PB.2954.123,FB-PB.2954.63,FB-PB.2954.167,FB-PB.2954.69,FB-PB.2954.171,FB-PB.2954.1,FB-PB.2954.39,FB-PB.2954.126,FB-PB.2954.79,FB-PB.2954.119,FB-PB.2954.88,FB-PB.2954.29,FB-PB.2954.109,FB-PB.2954.2,FB-PB.2954.116,FB-PB.2954.17,FB-PB.2954.129,FB-PB.2954.105,FB-PB.2954.120,FB-PB.2954.142,FB-PB.2954.114,FB-PB.2954.107,FB-PB.2954.31,FB-PB.2954.153,FB-PB.29…
chr2	FB-PB.2954	FN1	SE	FB-PB.2954;SE:chr2:215379317-215380811:215381080-215382212:-	0.515594	0	Up	FB-PB.2954.126	FB-PB.2954.47,FB-PB.2954.164,FB-PB.2954.76,FB-PB.2954.123,FB-PB.2954.63,FB-PB.2954.167,FB-PB.2954.69,FB-PB.2954.171,FB-PB.2954.1,FB-PB.2954.39,FB-PB.2954.126,FB-PB.2954.79,FB-PB.2954.119,FB-PB.2954.88,FB-PB.2954.29,FB-PB.2954.109,FB-PB.2954.2,FB-PB.2954.116,FB-PB.2954.17,FB-PB.2954.129,FB-PB.2954.105,FB-PB.2954.120,FB-PB.2954.142,FB-PB.2954.114,FB-PB.2954.107,FB-PB.2954.31,FB-PB.2954.153,FB-PB.29…
chr2	FB-PB.2954	FN1	SE	FB-PB.2954;SE:chr2:215379317-215380811:215381080-215382212:-	0.515594	0	Up	FB-PB.2954.125	FB-PB.2954.47,FB-PB.2954.164,FB-PB.2954.76,FB-PB.2954.123,FB-PB.2954.63,FB-PB.2954.167,FB-PB.2954.69,FB-PB.2954.171,FB-PB.2954.1,FB-PB.2954.39,FB-PB.2954.126,FB-PB.2954.79,FB-PB.2954.119,FB-PB.2954.88,FB-PB.2954.29,FB-PB.2954.109,FB-PB.2954.2,FB-PB.2954.116,FB-PB.2954.17,FB-PB.2954.129,FB-PB.2954.105,FB-PB.2954.120,FB-PB.2954.142,FB-PB.2954.114,FB-PB.2954.107,FB-PB.2954.31,FB-PB.2954.153,FB-PB.29…
chr2	FB-PB.2954	FN1	SE	FB-PB.2954;SE:chr2:215379317-215380811:215381080-215382212:-	0.515594	0	Up	FB-PB.2954.123	FB-PB.2954.47,FB-PB.2954.164,FB-PB.2954.76,FB-PB.2954.123,FB-PB.2954.63,FB-PB.2954.167,FB-PB.2954.69,FB-PB.2954.171,FB-PB.2954.1,FB-PB.2954.39,FB-PB.2954.126,FB-PB.2954.79,FB-PB.2954.119,FB-PB.2954.88,FB-PB.2954.29,FB-PB.2954.109,FB-PB.2954.2,FB-PB.2954.116,FB-PB.2954.17,FB-PB.2954.129,FB-PB.2954.105,FB-PB.2954.120,FB-PB.2954.142,FB-PB.2954.114,FB-PB.2954.107,FB-PB.2954.31,FB-PB.2954.153,FB-PB.29…
chr2	FB-PB.2954	FN1	SE	FB-PB.2954;SE:chr2:215379317-215380811:215381080-215382212:-	0.515594	0	Up	FB-PB.2954.124	FB-PB.2954.47,FB-PB.2954.164,FB-PB.2954.76,FB-PB.2954.123,FB-PB.2954.63,FB-PB.2954.167,FB-PB.2954.69,FB-PB.2954.171,FB-PB.2954.1,FB-PB.2954.39,FB-PB.2954.126,FB-PB.2954.79,FB-PB.2954.119,FB-PB.2954.88,FB-PB.2954.29,FB-PB.2954.109,FB-PB.2954.2,FB-PB.2954.116,FB-PB.2954.17,FB-PB.2954.129,FB-PB.2954.105,FB-PB.2954.120,FB-PB.2954.142,FB-PB.2954.114,FB-PB.2954.107,FB-PB.2954.31,FB-PB.2954.153,FB-PB.29…
chr2	FB-PB.2954	FN1	SE	FB-PB.2954;SE:chr2:215379317-215380811:215381080-215382212:-	0.515594	0	Up	FB-PB.2954.117	FB-PB.2954.47,FB-PB.2954.164,FB-PB.2954.76,FB-PB.2954.123,FB-PB.2954.63,FB-PB.2954.167,FB-PB.2954.69,FB-PB.2954.171,FB-PB.2954.1,FB-PB.2954.39,FB-PB.2954.126,FB-PB.2954.79,FB-PB.2954.119,FB-PB.2954.88,FB-PB.2954.29,FB-PB.2954.109,FB-PB.2954.2,FB-PB.2954.116,FB-PB.2954.17,FB-PB.2954.129,FB-PB.2954.105,FB-PB.2954.120,FB-PB.2954.142,FB-PB.2954.114,FB-PB.2954.107,FB-PB.2954.31,FB-PB.2954.153,FB-PB.29…
chr2	FB-PB.2954	FN1	SE	FB-PB.2954;SE:chr2:215379317-215380811:215381080-215382212:-	0.515594	0	Up	FB-PB.2954.129	FB-PB.2954.47,FB-PB.2954.164,FB-PB.2954.76,FB-PB.2954.123,FB-PB.2954.63,FB-PB.2954.167,FB-PB.2954.69,FB-PB.2954.171,FB-PB.2954.1,FB-PB.2954.39,FB-PB.2954.126,FB-PB.2954.79,FB-PB.2954.119,FB-PB.2954.88,FB-PB.2954.29,FB-PB.2954.109,FB-PB.2954.2,FB-PB.2954.116,FB-PB.2954.17,FB-PB.2954.129,FB-PB.2954.105,FB-PB.2954.120,FB-PB.2954.142,FB-PB.2954.114,FB-PB.2954.107,FB-PB.2954.31,FB-PB.2954.153,FB-PB.29…
chr2	FB-PB.2954	FN1	SE	FB-PB.2954;SE:chr2:215379317-215380811:215381080-215382212:-	0.515594	0	Up	FB-PB.2954.118	FB-PB.2954.47,FB-PB.2954.164,FB-PB.2954.76,FB-PB.2954.123,FB-PB.2954.63,FB-PB.2954.167,FB-PB.2954.69,FB-PB.2954.171,FB-PB.2954.1,FB-PB.2954.39,FB-PB.2954.126,FB-PB.2954.79,FB-PB.2954.119,FB-PB.2954.88,FB-PB.2954.29,FB-PB.2954.109,FB-PB.2954.2,FB-PB.2954.116,FB-PB.2954.17,FB-PB.2954.129,FB-PB.2954.105,FB-PB.2954.120,FB-PB.2954.142,FB-PB.2954.114,FB-PB.2954.107,FB-PB.2954.31,FB-PB.2954.153,FB-PB.29…
chr2	FB-PB.2954	FN1	SE	FB-PB.2954;SE:chr2:215379317-215380811:215381080-215382212:-	0.515594	0	Up	FB-PB.2954.96	FB-PB.2954.47,FB-PB.2954.164,FB-PB.2954.76,FB-PB.2954.123,FB-PB.2954.63,FB-PB.2954.167,FB-PB.2954.69,FB-PB.2954.171,FB-PB.2954.1,FB-PB.2954.39,FB-PB.2954.126,FB-PB.2954.79,FB-PB.2954.119,FB-PB.2954.88,FB-PB.2954.29,FB-PB.2954.109,FB-PB.2954.2,FB-PB.2954.116,FB-PB.2954.17,FB-PB.2954.129,FB-PB.2954.105,FB-PB.2954.120,FB-PB.2954.142,FB-PB.2954.114,FB-PB.2954.107,FB-PB.2954.31,FB-PB.2954.153,FB-PB.29…
chr2	FB-PB.2954	FN1	SE	FB-PB.2954;SE:chr2:215379317-215380811:215381080-215382212:-	0.515594	0	Up	FB-PB.2954.101	FB-PB.2954.47,FB-PB.2954.164,FB-PB.2954.76,FB-PB.2954.123,FB-PB.2954.63,FB-PB.2954.167,FB-PB.2954.69,FB-PB.2954.171,FB-PB.2954.1,FB-PB.2954.39,FB-PB.2954.126,FB-PB.2954.79,FB-PB.2954.119,FB-PB.2954.88,FB-PB.2954.29,FB-PB.2954.109,FB-PB.2954.2,FB-PB.2954.116,FB-PB.2954.17,FB-PB.2954.129,FB-PB.2954.105,FB-PB.2954.120,FB-PB.2954.142,FB-PB.2954.114,FB-PB.2954.107,FB-PB.2954.31,FB-PB.2954.153,FB-PB.29…
chr2	FB-PB.2954	FN1	SE	FB-PB.2954;SE:chr2:215379317-215380811:215381080-215382212:-	0.515594	0	Up	FB-PB.2954.98	FB-PB.2954.47,FB-PB.2954.164,FB-PB.2954.76,FB-PB.2954.123,FB-PB.2954.63,FB-PB.2954.167,FB-PB.2954.69,FB-PB.2954.171,FB-PB.2954.1,FB-PB.2954.39,FB-PB.2954.126,FB-PB.2954.79,FB-PB.2954.119,FB-PB.2954.88,FB-PB.2954.29,FB-PB.2954.109,FB-PB.2954.2,FB-PB.2954.116,FB-PB.2954.17,FB-PB.2954.129,FB-PB.2954.105,FB-PB.2954.120,FB-PB.2954.142,FB-PB.2954.114,FB-PB.2954.107,FB-PB.2954.31,FB-PB.2954.153,FB-PB.29…
chr2	FB-PB.2954	FN1	SE	FB-PB.2954;SE:chr2:215379317-215380811:215381080-215382212:-	0.515594	0	Up	FB-PB.2954.93	FB-PB.2954.47,FB-PB.2954.164,FB-PB.2954.76,FB-PB.2954.123,FB-PB.2954.63,FB-PB.2954.167,FB-PB.2954.69,FB-PB.2954.171,FB-PB.2954.1,FB-PB.2954.39,FB-PB.2954.126,FB-PB.2954.79,FB-PB.2954.119,FB-PB.2954.88,FB-PB.2954.29,FB-PB.2954.109,FB-PB.2954.2,FB-PB.2954.116,FB-PB.2954.17,FB-PB.2954.129,FB-PB.2954.105,FB-PB.2954.120,FB-PB.2954.142,FB-PB.2954.114,FB-PB.2954.107,FB-PB.2954.31,FB-PB.2954.153,FB-PB.29…
chr2	FB-PB.2954	FN1	SE	FB-PB.2954;SE:chr2:215379317-215380811:215381080-215382212:-	0.515594	0	Up	FB-PB.2954.95	FB-PB.2954.47,FB-PB.2954.164,FB-PB.2954.76,FB-PB.2954.123,FB-PB.2954.63,FB-PB.2954.167,FB-PB.2954.69,FB-PB.2954.171,FB-PB.2954.1,FB-PB.2954.39,FB-PB.2954.126,FB-PB.2954.79,FB-PB.2954.119,FB-PB.2954.88,FB-PB.2954.29,FB-PB.2954.109,FB-PB.2954.2,FB-PB.2954.116,FB-PB.2954.17,FB-PB.2954.129,FB-PB.2954.105,FB-PB.2954.120,FB-PB.2954.142,FB-PB.2954.114,FB-PB.2954.107,FB-PB.2954.31,FB-PB.2954.153,FB-PB.29…
chr2	FB-PB.2954	FN1	SE	FB-PB.2954;SE:chr2:215379317-215380811:215381080-215382212:-	0.515594	0	Up	FB-PB.2954.91	FB-PB.2954.47,FB-PB.2954.164,FB-PB.2954.76,FB-PB.2954.123,FB-PB.2954.63,FB-PB.2954.167,FB-PB.2954.69,FB-PB.2954.171,FB-PB.2954.1,FB-PB.2954.39,FB-PB.2954.126,FB-PB.2954.79,FB-PB.2954.119,FB-PB.2954.88,FB-PB.2954.29,FB-PB.2954.109,FB-PB.2954.2,FB-PB.2954.116,FB-PB.2954.17,FB-PB.2954.129,FB-PB.2954.105,FB-PB.2954.120,FB-PB.2954.142,FB-PB.2954.114,FB-PB.2954.107,FB-PB.2954.31,FB-PB.2954.153,FB-PB.29…
chr2	FB-PB.2954	FN1	SE	FB-PB.2954;SE:chr2:215379317-215380811:215381080-215382212:-	0.515594	0	Up	FB-PB.2954.90	FB-PB.2954.47,FB-PB.2954.164,FB-PB.2954.76,FB-PB.2954.123,FB-PB.2954.63,FB-PB.2954.167,FB-PB.2954.69,FB-PB.2954.171,FB-PB.2954.1,FB-PB.2954.39,FB-PB.2954.126,FB-PB.2954.79,FB-PB.2954.119,FB-PB.2954.88,FB-PB.2954.29,FB-PB.2954.109,FB-PB.2954.2,FB-PB.2954.116,FB-PB.2954.17,FB-PB.2954.129,FB-PB.2954.105,FB-PB.2954.120,FB-PB.2954.142,FB-PB.2954.114,FB-PB.2954.107,FB-PB.2954.31,FB-PB.2954.153,FB-PB.29…
chr2	FB-PB.2954	FN1	SE	FB-PB.2954;SE:chr2:215379317-215380811:215381080-215382212:-	0.515594	0	Up	FB-PB.2954.97	FB-PB.2954.47,FB-PB.2954.164,FB-PB.2954.76,FB-PB.2954.123,FB-PB.2954.63,FB-PB.2954.167,FB-PB.2954.69,FB-PB.2954.171,FB-PB.2954.1,FB-PB.2954.39,FB-PB.2954.126,FB-PB.2954.79,FB-PB.2954.119,FB-PB.2954.88,FB-PB.2954.29,FB-PB.2954.109,FB-PB.2954.2,FB-PB.2954.116,FB-PB.2954.17,FB-PB.2954.129,FB-PB.2954.105,FB-PB.2954.120,FB-PB.2954.142,FB-PB.2954.114,FB-PB.2954.107,FB-PB.2954.31,FB-PB.2954.153,FB-PB.29…
chr2	FB-PB.2954	FN1	SE	FB-PB.2954;SE:chr2:215379317-215380811:215381080-215382212:-	0.515594	0	Up	FB-PB.2954.110	FB-PB.2954.47,FB-PB.2954.164,FB-PB.2954.76,FB-PB.2954.123,FB-PB.2954.63,FB-PB.2954.167,FB-PB.2954.69,FB-PB.2954.171,FB-PB.2954.1,FB-PB.2954.39,FB-PB.2954.126,FB-PB.2954.79,FB-PB.2954.119,FB-PB.2954.88,FB-PB.2954.29,FB-PB.2954.109,FB-PB.2954.2,FB-PB.2954.116,FB-PB.2954.17,FB-PB.2954.129,FB-PB.2954.105,FB-PB.2954.120,FB-PB.2954.142,FB-PB.2954.114,FB-PB.2954.107,FB-PB.2954.31,FB-PB.2954.153,FB-PB.29…
chr2	FB-PB.2954	FN1	SE	FB-PB.2954;SE:chr2:215379317-215380811:215381080-215382212:-	0.515594	0	Up	FB-PB.2954.116	FB-PB.2954.47,FB-PB.2954.164,FB-PB.2954.76,FB-PB.2954.123,FB-PB.2954.63,FB-PB.2954.167,FB-PB.2954.69,FB-PB.2954.171,FB-PB.2954.1,FB-PB.2954.39,FB-PB.2954.126,FB-PB.2954.79,FB-PB.2954.119,FB-PB.2954.88,FB-PB.2954.29,FB-PB.2954.109,FB-PB.2954.2,FB-PB.2954.116,FB-PB.2954.17,FB-PB.2954.129,FB-PB.2954.105,FB-PB.2954.120,FB-PB.2954.142,FB-PB.2954.114,FB-PB.2954.107,FB-PB.2954.31,FB-PB.2954.153,FB-PB.29…
chr2	FB-PB.2954	FN1	SE	FB-PB.2954;SE:chr2:215379317-215380811:215381080-215382212:-	0.515594	0	Up	FB-PB.2954.114	FB-PB.2954.47,FB-PB.2954.164,FB-PB.2954.76,FB-PB.2954.123,FB-PB.2954.63,FB-PB.2954.167,FB-PB.2954.69,FB-PB.2954.171,FB-PB.2954.1,FB-PB.2954.39,FB-PB.2954.126,FB-PB.2954.79,FB-PB.2954.119,FB-PB.2954.88,FB-PB.2954.29,FB-PB.2954.109,FB-PB.2954.2,FB-PB.2954.116,FB-PB.2954.17,FB-PB.2954.129,FB-PB.2954.105,FB-PB.2954.120,FB-PB.2954.142,FB-PB.2954.114,FB-PB.2954.107,FB-PB.2954.31,FB-PB.2954.153,FB-PB.29…
chr2	FB-PB.2954	FN1	SE	FB-PB.2954;SE:chr2:215379317-215380811:215381080-215382212:-	0.515594	0	Up	FB-PB.2954.113	FB-PB.2954.47,FB-PB.2954.164,FB-PB.2954.76,FB-PB.2954.123,FB-PB.2954.63,FB-PB.2954.167,FB-PB.2954.69,FB-PB.2954.171,FB-PB.2954.1,FB-PB.2954.39,FB-PB.2954.126,FB-PB.2954.79,FB-PB.2954.119,FB-PB.2954.88,FB-PB.2954.29,FB-PB.2954.109,FB-PB.2954.2,FB-PB.2954.116,FB-PB.2954.17,FB-PB.2954.129,FB-PB.2954.105,FB-PB.2954.120,FB-PB.2954.142,FB-PB.2954.114,FB-PB.2954.107,FB-PB.2954.31,FB-PB.2954.153,FB-PB.29…
chr2	FB-PB.2954	FN1	SE	FB-PB.2954;SE:chr2:215379317-215380811:215381080-215382212:-	0.515594	0	Up	FB-PB.2954.112	FB-PB.2954.47,FB-PB.2954.164,FB-PB.2954.76,FB-PB.2954.123,FB-PB.2954.63,FB-PB.2954.167,FB-PB.2954.69,FB-PB.2954.171,FB-PB.2954.1,FB-PB.2954.39,FB-PB.2954.126,FB-PB.2954.79,FB-PB.2954.119,FB-PB.2954.88,FB-PB.2954.29,FB-PB.2954.109,FB-PB.2954.2,FB-PB.2954.116,FB-PB.2954.17,FB-PB.2954.129,FB-PB.2954.105,FB-PB.2954.120,FB-PB.2954.142,FB-PB.2954.114,FB-PB.2954.107,FB-PB.2954.31,FB-PB.2954.153,FB-PB.29…
chr2	FB-PB.2954	FN1	SE	FB-PB.2954;SE:chr2:215379317-215380811:215381080-215382212:-	0.515594	0	Up	FB-PB.2954.107	FB-PB.2954.47,FB-PB.2954.164,FB-PB.2954.76,FB-PB.2954.123,FB-PB.2954.63,FB-PB.2954.167,FB-PB.2954.69,FB-PB.2954.171,FB-PB.2954.1,FB-PB.2954.39,FB-PB.2954.126,FB-PB.2954.79,FB-PB.2954.119,FB-PB.2954.88,FB-PB.2954.29,FB-PB.2954.109,FB-PB.2954.2,FB-PB.2954.116,FB-PB.2954.17,FB-PB.2954.129,FB-PB.2954.105,FB-PB.2954.120,FB-PB.2954.142,FB-PB.2954.114,FB-PB.2954.107,FB-PB.2954.31,FB-PB.2954.153,FB-PB.29…
chr2	FB-PB.2954	FN1	SE	FB-PB.2954;SE:chr2:215379317-215380811:215381080-215382212:-	0.515594	0	Up	FB-PB.2954.106	FB-PB.2954.47,FB-PB.2954.164,FB-PB.2954.76,FB-PB.2954.123,FB-PB.2954.63,FB-PB.2954.167,FB-PB.2954.69,FB-PB.2954.171,FB-PB.2954.1,FB-PB.2954.39,FB-PB.2954.126,FB-PB.2954.79,FB-PB.2954.119,FB-PB.2954.88,FB-PB.2954.29,FB-PB.2954.109,FB-PB.2954.2,FB-PB.2954.116,FB-PB.2954.17,FB-PB.2954.129,FB-PB.2954.105,FB-PB.2954.120,FB-PB.2954.142,FB-PB.2954.114,FB-PB.2954.107,FB-PB.2954.31,FB-PB.2954.153,FB-PB.29…
chr2	FB-PB.2954	FN1	SE	FB-PB.2954;SE:chr2:215379317-215380811:215381080-215382212:-	0.515594	0	Up	FB-PB.2954.105	FB-PB.2954.47,FB-PB.2954.164,FB-PB.2954.76,FB-PB.2954.123,FB-PB.2954.63,FB-PB.2954.167,FB-PB.2954.69,FB-PB.2954.171,FB-PB.2954.1,FB-PB.2954.39,FB-PB.2954.126,FB-PB.2954.79,FB-PB.2954.119,FB-PB.2954.88,FB-PB.2954.29,FB-PB.2954.109,FB-PB.2954.2,FB-PB.2954.116,FB-PB.2954.17,FB-PB.2954.129,FB-PB.2954.105,FB-PB.2954.120,FB-PB.2954.142,FB-PB.2954.114,FB-PB.2954.107,FB-PB.2954.31,FB-PB.2954.153,FB-PB.29…
chr2	FB-PB.2954	FN1	SE	FB-PB.2954;SE:chr2:215379317-215380811:215381080-215382212:-	0.515594	0	Up	FB-PB.2954.103	FB-PB.2954.47,FB-PB.2954.164,FB-PB.2954.76,FB-PB.2954.123,FB-PB.2954.63,FB-PB.2954.167,FB-PB.2954.69,FB-PB.2954.171,FB-PB.2954.1,FB-PB.2954.39,FB-PB.2954.126,FB-PB.2954.79,FB-PB.2954.119,FB-PB.2954.88,FB-PB.2954.29,FB-PB.2954.109,FB-PB.2954.2,FB-PB.2954.116,FB-PB.2954.17,FB-PB.2954.129,FB-PB.2954.105,FB-PB.2954.120,FB-PB.2954.142,FB-PB.2954.114,FB-PB.2954.107,FB-PB.2954.31,FB-PB.2954.153,FB-PB.29…
chr2	FB-PB.2954	FN1	SE	FB-PB.2954;SE:chr2:215379317-215380811:215381080-215382212:-	0.515594	0	Up	FB-PB.2954.104	FB-PB.2954.47,FB-PB.2954.164,FB-PB.2954.76,FB-PB.2954.123,FB-PB.2954.63,FB-PB.2954.167,FB-PB.2954.69,FB-PB.2954.171,FB-PB.2954.1,FB-PB.2954.39,FB-PB.2954.126,FB-PB.2954.79,FB-PB.2954.119,FB-PB.2954.88,FB-PB.2954.29,FB-PB.2954.109,FB-PB.2954.2,FB-PB.2954.116,FB-PB.2954.17,FB-PB.2954.129,FB-PB.2954.105,FB-PB.2954.120,FB-PB.2954.142,FB-PB.2954.114,FB-PB.2954.107,FB-PB.2954.31,FB-PB.2954.153,FB-PB.29…
chr2	FB-PB.2954	FN1	SE	FB-PB.2954;SE:chr2:215379317-215380811:215381080-215382212:-	0.515594	0	Up	FB-PB.2954.102	FB-PB.2954.47,FB-PB.2954.164,FB-PB.2954.76,FB-PB.2954.123,FB-PB.2954.63,FB-PB.2954.167,FB-PB.2954.69,FB-PB.2954.171,FB-PB.2954.1,FB-PB.2954.39,FB-PB.2954.126,FB-PB.2954.79,FB-PB.2954.119,FB-PB.2954.88,FB-PB.2954.29,FB-PB.2954.109,FB-PB.2954.2,FB-PB.2954.116,FB-PB.2954.17,FB-PB.2954.129,FB-PB.2954.105,FB-PB.2954.120,FB-PB.2954.142,FB-PB.2954.114,FB-PB.2954.107,FB-PB.2954.31,FB-PB.2954.153,FB-PB.29…
chr2	FB-PB.2954	FN1	SE	FB-PB.2954;SE:chr2:215379317-215380811:215381080-215382212:-	0.515594	0	Up	FB-PB.2954.85	FB-PB.2954.47,FB-PB.2954.164,FB-PB.2954.76,FB-PB.2954.123,FB-PB.2954.63,FB-PB.2954.167,FB-PB.2954.69,FB-PB.2954.171,FB-PB.2954.1,FB-PB.2954.39,FB-PB.2954.126,FB-PB.2954.79,FB-PB.2954.119,FB-PB.2954.88,FB-PB.2954.29,FB-PB.2954.109,FB-PB.2954.2,FB-PB.2954.116,FB-PB.2954.17,FB-PB.2954.129,FB-PB.2954.105,FB-PB.2954.120,FB-PB.2954.142,FB-PB.2954.114,FB-PB.2954.107,FB-PB.2954.31,FB-PB.2954.153,FB-PB.29…
chr2	FB-PB.2954	FN1	SE	FB-PB.2954;SE:chr2:215379317-215380811:215381080-215382212:-	0.515594	0	Up	FB-PB.2954.162	FB-PB.2954.47,FB-PB.2954.164,FB-PB.2954.76,FB-PB.2954.123,FB-PB.2954.63,FB-PB.2954.167,FB-PB.2954.69,FB-PB.2954.171,FB-PB.2954.1,FB-PB.2954.39,FB-PB.2954.126,FB-PB.2954.79,FB-PB.2954.119,FB-PB.2954.88,FB-PB.2954.29,FB-PB.2954.109,FB-PB.2954.2,FB-PB.2954.116,FB-PB.2954.17,FB-PB.2954.129,FB-PB.2954.105,FB-PB.2954.120,FB-PB.2954.142,FB-PB.2954.114,FB-PB.2954.107,FB-PB.2954.31,FB-PB.2954.153,FB-PB.29…
chr2	FB-PB.2954	FN1	SE	FB-PB.2954;SE:chr2:215379317-215380811:215381080-215382212:-	0.515594	0	Up	FB-PB.2954.156	FB-PB.2954.47,FB-PB.2954.164,FB-PB.2954.76,FB-PB.2954.123,FB-PB.2954.63,FB-PB.2954.167,FB-PB.2954.69,FB-PB.2954.171,FB-PB.2954.1,FB-PB.2954.39,FB-PB.2954.126,FB-PB.2954.79,FB-PB.2954.119,FB-PB.2954.88,FB-PB.2954.29,FB-PB.2954.109,FB-PB.2954.2,FB-PB.2954.116,FB-PB.2954.17,FB-PB.2954.129,FB-PB.2954.105,FB-PB.2954.120,FB-PB.2954.142,FB-PB.2954.114,FB-PB.2954.107,FB-PB.2954.31,FB-PB.2954.153,FB-PB.29…
chr2	FB-PB.2954	FN1	SE	FB-PB.2954;SE:chr2:215379317-215380811:215381080-215382212:-	0.515594	0	Up	FB-PB.2954.160	FB-PB.2954.47,FB-PB.2954.164,FB-PB.2954.76,FB-PB.2954.123,FB-PB.2954.63,FB-PB.2954.167,FB-PB.2954.69,FB-PB.2954.171,FB-PB.2954.1,FB-PB.2954.39,FB-PB.2954.126,FB-PB.2954.79,FB-PB.2954.119,FB-PB.2954.88,FB-PB.2954.29,FB-PB.2954.109,FB-PB.2954.2,FB-PB.2954.116,FB-PB.2954.17,FB-PB.2954.129,FB-PB.2954.105,FB-PB.2954.120,FB-PB.2954.142,FB-PB.2954.114,FB-PB.2954.107,FB-PB.2954.31,FB-PB.2954.153,FB-PB.29…
chr2	FB-PB.2954	FN1	SE	FB-PB.2954;SE:chr2:215379317-215380811:215381080-215382212:-	0.515594	0	Up	FB-PB.2954.161	FB-PB.2954.47,FB-PB.2954.164,FB-PB.2954.76,FB-PB.2954.123,FB-PB.2954.63,FB-PB.2954.167,FB-PB.2954.69,FB-PB.2954.171,FB-PB.2954.1,FB-PB.2954.39,FB-PB.2954.126,FB-PB.2954.79,FB-PB.2954.119,FB-PB.2954.88,FB-PB.2954.29,FB-PB.2954.109,FB-PB.2954.2,FB-PB.2954.116,FB-PB.2954.17,FB-PB.2954.129,FB-PB.2954.105,FB-PB.2954.120,FB-PB.2954.142,FB-PB.2954.114,FB-PB.2954.107,FB-PB.2954.31,FB-PB.2954.153,FB-PB.29…
chr2	FB-PB.2954	FN1	SE	FB-PB.2954;SE:chr2:215379317-215380811:215381080-215382212:-	0.515594	0	Up	FB-PB.2954.157	FB-PB.2954.47,FB-PB.2954.164,FB-PB.2954.76,FB-PB.2954.123,FB-PB.2954.63,FB-PB.2954.167,FB-PB.2954.69,FB-PB.2954.171,FB-PB.2954.1,FB-PB.2954.39,FB-PB.2954.126,FB-PB.2954.79,FB-PB.2954.119,FB-PB.2954.88,FB-PB.2954.29,FB-PB.2954.109,FB-PB.2954.2,FB-PB.2954.116,FB-PB.2954.17,FB-PB.2954.129,FB-PB.2954.105,FB-PB.2954.120,FB-PB.2954.142,FB-PB.2954.114,FB-PB.2954.107,FB-PB.2954.31,FB-PB.2954.153,FB-PB.29…
chr2	FB-PB.2954	FN1	SE	FB-PB.2954;SE:chr2:215379317-215380811:215381080-215382212:-	0.515594	0	Up	FB-PB.2954.158	FB-PB.2954.47,FB-PB.2954.164,FB-PB.2954.76,FB-PB.2954.123,FB-PB.2954.63,FB-PB.2954.167,FB-PB.2954.69,FB-PB.2954.171,FB-PB.2954.1,FB-PB.2954.39,FB-PB.2954.126,FB-PB.2954.79,FB-PB.2954.119,FB-PB.2954.88,FB-PB.2954.29,FB-PB.2954.109,FB-PB.2954.2,FB-PB.2954.116,FB-PB.2954.17,FB-PB.2954.129,FB-PB.2954.105,FB-PB.2954.120,FB-PB.2954.142,FB-PB.2954.114,FB-PB.2954.107,FB-PB.2954.31,FB-PB.2954.153,FB-PB.29…
chr2	FB-PB.2954	FN1	SE	FB-PB.2954;SE:chr2:215379317-215380811:215381080-215382212:-	0.515594	0	Up	FB-PB.2954.151	FB-PB.2954.47,FB-PB.2954.164,FB-PB.2954.76,FB-PB.2954.123,FB-PB.2954.63,FB-PB.2954.167,FB-PB.2954.69,FB-PB.2954.171,FB-PB.2954.1,FB-PB.2954.39,FB-PB.2954.126,FB-PB.2954.79,FB-PB.2954.119,FB-PB.2954.88,FB-PB.2954.29,FB-PB.2954.109,FB-PB.2954.2,FB-PB.2954.116,FB-PB.2954.17,FB-PB.2954.129,FB-PB.2954.105,FB-PB.2954.120,FB-PB.2954.142,FB-PB.2954.114,FB-PB.2954.107,FB-PB.2954.31,FB-PB.2954.153,FB-PB.29…
chr2	FB-PB.2954	FN1	SE	FB-PB.2954;SE:chr2:215379317-215380811:215381080-215382212:-	0.515594	0	Up	FB-PB.2954.108	FB-PB.2954.47,FB-PB.2954.164,FB-PB.2954.76,FB-PB.2954.123,FB-PB.2954.63,FB-PB.2954.167,FB-PB.2954.69,FB-PB.2954.171,FB-PB.2954.1,FB-PB.2954.39,FB-PB.2954.126,FB-PB.2954.79,FB-PB.2954.119,FB-PB.2954.88,FB-PB.2954.29,FB-PB.2954.109,FB-PB.2954.2,FB-PB.2954.116,FB-PB.2954.17,FB-PB.2954.129,FB-PB.2954.105,FB-PB.2954.120,FB-PB.2954.142,FB-PB.2954.114,FB-PB.2954.107,FB-PB.2954.31,FB-PB.2954.153,FB-PB.29…
chr2	FB-PB.2954	FN1	SE	FB-PB.2954;SE:chr2:215379317-215380811:215381080-215382212:-	0.515594	0	Up	FB-PB.2954.154	FB-PB.2954.47,FB-PB.2954.164,FB-PB.2954.76,FB-PB.2954.123,FB-PB.2954.63,FB-PB.2954.167,FB-PB.2954.69,FB-PB.2954.171,FB-PB.2954.1,FB-PB.2954.39,FB-PB.2954.126,FB-PB.2954.79,FB-PB.2954.119,FB-PB.2954.88,FB-PB.2954.29,FB-PB.2954.109,FB-PB.2954.2,FB-PB.2954.116,FB-PB.2954.17,FB-PB.2954.129,FB-PB.2954.105,FB-PB.2954.120,FB-PB.2954.142,FB-PB.2954.114,FB-PB.2954.107,FB-PB.2954.31,FB-PB.2954.153,FB-PB.29…
chr2	FB-PB.2954	FN1	SE	FB-PB.2954;SE:chr2:215379317-215380811:215381080-215382212:-	0.515594	0	Up	FB-PB.2954.31	FB-PB.2954.47,FB-PB.2954.164,FB-PB.2954.76,FB-PB.2954.123,FB-PB.2954.63,FB-PB.2954.167,FB-PB.2954.69,FB-PB.2954.171,FB-PB.2954.1,FB-PB.2954.39,FB-PB.2954.126,FB-PB.2954.79,FB-PB.2954.119,FB-PB.2954.88,FB-PB.2954.29,FB-PB.2954.109,FB-PB.2954.2,FB-PB.2954.116,FB-PB.2954.17,FB-PB.2954.129,FB-PB.2954.105,FB-PB.2954.120,FB-PB.2954.142,FB-PB.2954.114,FB-PB.2954.107,FB-PB.2954.31,FB-PB.2954.153,FB-PB.29…
chr2	FB-PB.2954	FN1	SE	FB-PB.2954;SE:chr2:215379317-215380811:215381080-215382212:-	0.515594	0	Up	FB-PB.2954.171	FB-PB.2954.47,FB-PB.2954.164,FB-PB.2954.76,FB-PB.2954.123,FB-PB.2954.63,FB-PB.2954.167,FB-PB.2954.69,FB-PB.2954.171,FB-PB.2954.1,FB-PB.2954.39,FB-PB.2954.126,FB-PB.2954.79,FB-PB.2954.119,FB-PB.2954.88,FB-PB.2954.29,FB-PB.2954.109,FB-PB.2954.2,FB-PB.2954.116,FB-PB.2954.17,FB-PB.2954.129,FB-PB.2954.105,FB-PB.2954.120,FB-PB.2954.142,FB-PB.2954.114,FB-PB.2954.107,FB-PB.2954.31,FB-PB.2954.153,FB-PB.29…
chr2	FB-PB.2954	FN1	SE	FB-PB.2954;SE:chr2:215379317-215380811:215381080-215382212:-	0.515594	0	Up	FB-PB.2954.170	FB-PB.2954.47,FB-PB.2954.164,FB-PB.2954.76,FB-PB.2954.123,FB-PB.2954.63,FB-PB.2954.167,FB-PB.2954.69,FB-PB.2954.171,FB-PB.2954.1,FB-PB.2954.39,FB-PB.2954.126,FB-PB.2954.79,FB-PB.2954.119,FB-PB.2954.88,FB-PB.2954.29,FB-PB.2954.109,FB-PB.2954.2,FB-PB.2954.116,FB-PB.2954.17,FB-PB.2954.129,FB-PB.2954.105,FB-PB.2954.120,FB-PB.2954.142,FB-PB.2954.114,FB-PB.2954.107,FB-PB.2954.31,FB-PB.2954.153,FB-PB.29…
chr2	FB-PB.2954	FN1	SE	FB-PB.2954;SE:chr2:215379317-215380811:215381080-215382212:-	0.515594	0	Up	FB-PB.2954.166	FB-PB.2954.47,FB-PB.2954.164,FB-PB.2954.76,FB-PB.2954.123,FB-PB.2954.63,FB-PB.2954.167,FB-PB.2954.69,FB-PB.2954.171,FB-PB.2954.1,FB-PB.2954.39,FB-PB.2954.126,FB-PB.2954.79,FB-PB.2954.119,FB-PB.2954.88,FB-PB.2954.29,FB-PB.2954.109,FB-PB.2954.2,FB-PB.2954.116,FB-PB.2954.17,FB-PB.2954.129,FB-PB.2954.105,FB-PB.2954.120,FB-PB.2954.142,FB-PB.2954.114,FB-PB.2954.107,FB-PB.2954.31,FB-PB.2954.153,FB-PB.29…
chr2	FB-PB.2954	FN1	SE	FB-PB.2954;SE:chr2:215379317-215380811:215381080-215382212:-	0.515594	0	Up	FB-PB.2954.168	FB-PB.2954.47,FB-PB.2954.164,FB-PB.2954.76,FB-PB.2954.123,FB-PB.2954.63,FB-PB.2954.167,FB-PB.2954.69,FB-PB.2954.171,FB-PB.2954.1,FB-PB.2954.39,FB-PB.2954.126,FB-PB.2954.79,FB-PB.2954.119,FB-PB.2954.88,FB-PB.2954.29,FB-PB.2954.109,FB-PB.2954.2,FB-PB.2954.116,FB-PB.2954.17,FB-PB.2954.129,FB-PB.2954.105,FB-PB.2954.120,FB-PB.2954.142,FB-PB.2954.114,FB-PB.2954.107,FB-PB.2954.31,FB-PB.2954.153,FB-PB.29…
chr2	FB-PB.2954	FN1	SE	FB-PB.2954;SE:chr2:215379317-215380811:215381080-215382212:-	0.515594	0	Up	FB-PB.2954.36	FB-PB.2954.47,FB-PB.2954.164,FB-PB.2954.76,FB-PB.2954.123,FB-PB.2954.63,FB-PB.2954.167,FB-PB.2954.69,FB-PB.2954.171,FB-PB.2954.1,FB-PB.2954.39,FB-PB.2954.126,FB-PB.2954.79,FB-PB.2954.119,FB-PB.2954.88,FB-PB.2954.29,FB-PB.2954.109,FB-PB.2954.2,FB-PB.2954.116,FB-PB.2954.17,FB-PB.2954.129,FB-PB.2954.105,FB-PB.2954.120,FB-PB.2954.142,FB-PB.2954.114,FB-PB.2954.107,FB-PB.2954.31,FB-PB.2954.153,FB-PB.29…
chr2	FB-PB.2954	FN1	SE	FB-PB.2954;SE:chr2:215379317-215380811:215381080-215382212:-	0.515594	0	Up	FB-PB.2954.172	FB-PB.2954.47,FB-PB.2954.164,FB-PB.2954.76,FB-PB.2954.123,FB-PB.2954.63,FB-PB.2954.167,FB-PB.2954.69,FB-PB.2954.171,FB-PB.2954.1,FB-PB.2954.39,FB-PB.2954.126,FB-PB.2954.79,FB-PB.2954.119,FB-PB.2954.88,FB-PB.2954.29,FB-PB.2954.109,FB-PB.2954.2,FB-PB.2954.116,FB-PB.2954.17,FB-PB.2954.129,FB-PB.2954.105,FB-PB.2954.120,FB-PB.2954.142,FB-PB.2954.114,FB-PB.2954.107,FB-PB.2954.31,FB-PB.2954.153,FB-PB.29…
chr2	FB-PB.2954	FN1	SE	FB-PB.2954;SE:chr2:215379317-215380811:215381080-215382212:-	0.515594	0	Up	FB-PB.2954.175	FB-PB.2954.47,FB-PB.2954.164,FB-PB.2954.76,FB-PB.2954.123,FB-PB.2954.63,FB-PB.2954.167,FB-PB.2954.69,FB-PB.2954.171,FB-PB.2954.1,FB-PB.2954.39,FB-PB.2954.126,FB-PB.2954.79,FB-PB.2954.119,FB-PB.2954.88,FB-PB.2954.29,FB-PB.2954.109,FB-PB.2954.2,FB-PB.2954.116,FB-PB.2954.17,FB-PB.2954.129,FB-PB.2954.105,FB-PB.2954.120,FB-PB.2954.142,FB-PB.2954.114,FB-PB.2954.107,FB-PB.2954.31,FB-PB.2954.153,FB-PB.29…
chr5	FB-PB.4037	PAM	SE	FB-PB.4037;SE:chr5:103019843-103025131:103025334-103028185:+	-0.343383	0.0474525	Down	FB-PB.4037.12	FB-PB.4037.15,FB-PB.4037.12,FB-PB.4037.18
chr6	FB-PB.4303	SNX14	SE	FB-PB.4303;SE:chr6:85536924-85538838:85538864-85541985:-	-0.336566	0.00799201	Down	FB-PB.4303.1	FB-PB.4303.1,FB-PB.4303.3,FB-PB.4303.2,FB-PB.4303.5,FB-PB.4303.4
chr6	FB-PB.4303	SNX14	SE	FB-PB.4303;SE:chr6:85536924-85538838:85538864-85541985:-	-0.336566	0.00799201	Down	FB-PB.4303.4	FB-PB.4303.1,FB-PB.4303.3,FB-PB.4303.2,FB-PB.4303.5,FB-PB.4303.4
chr6	FB-PB.4303	SNX14	SE	FB-PB.4303;SE:chr6:85536924-85538838:85538864-85541985:-	-0.336566	0.00799201	Down	FB-PB.4303.5	FB-PB.4303.1,FB-PB.4303.3,FB-PB.4303.2,FB-PB.4303.5,FB-PB.4303.4
chr3	FB-PB.3307	FBLN2	SE	FB-PB.3307;SE:chr3:13619831-13621775:13621915-13626445:+	-0.298393	0.000499501	Down	FB-PB.3307.1	FB-PB.3307.1,FB-PB.3307.2
chr17	FB-PB.2238	SRSF1	RI	FB-PB.2238;RI:chr17:58003496:58005600-58005801:58005973:-	-0.294031	0.00699301	Down	FB-PB.2238.4	FB-PB.2238.5,FB-PB.2238.4
chr12	FB-PB.1369	CAMKK2	SE	FB-PB.1369;SE:chr12:121240869-121244573:121244615-121245140:-	-0.275053	0.038961	Down	FB-PB.1369.3	FB-PB.1369.1,FB-PB.1369.2,FB-PB.1369.4,FB-PB.1369.3
chr12	FB-PB.1369	CAMKK2	SE	FB-PB.1369;SE:chr12:121240869-121244573:121244615-121245140:-	-0.275053	0.038961	Down	FB-PB.1369.1	FB-PB.1369.1,FB-PB.1369.2,FB-PB.1369.4,FB-PB.1369.3
chr7	FB-PB.4587	ARPC1B	SE	FB-PB.4587;SE:chr7:99374781-99377338:99377455-99385702:+	-0.258628	0.014985	Down	FB-PB.4587.7	FB-PB.4587.8,FB-PB.4587.2,FB-PB.4587.4,FB-PB.4587.7,FB-PB.4587.3,FB-PB.4587.9,FB-PB.4587.1
chr7	FB-PB.4587	ARPC1B	SE	FB-PB.4587;SE:chr7:99374781-99377338:99377455-99385702:+	-0.258628	0.014985	Down	FB-PB.4587.8	FB-PB.4587.8,FB-PB.4587.2,FB-PB.4587.4,FB-PB.4587.7,FB-PB.4587.3,FB-PB.4587.9,FB-PB.4587.1
chr2	FB-PB.2676	SRSF7	RI	FB-PB.2676;RI:chr2:38748579:38748653-38749529:38749705:-	-0.225408	0.011988	Down	FB-PB.2676.1	FB-PB.2676.2,FB-PB.2676.1
chr2	FB-PB.2954	FN1	RI	FB-PB.2954;RI:chr2:215371909:215372015-215372109:215372375:-	-0.223955	0.0474525	Down	FB-PB.2954.1	FB-PB.2954.47,FB-PB.2954.164,FB-PB.2954.76,FB-PB.2954.63,FB-PB.2954.167,FB-PB.2954.69,FB-PB.2954.171,FB-PB.2954.1,FB-PB.2954.126,FB-PB.2954.119,FB-PB.2954.109,FB-PB.2954.2,FB-PB.2954.116,FB-PB.2954.129,FB-PB.2954.105,FB-PB.2954.120,FB-PB.2954.142,FB-PB.2954.114,FB-PB.2954.107,FB-PB.2954.31,FB-PB.2954.153,FB-PB.2954.138,FB-PB.2954.149,FB-PB.2954.13,FB-PB.2954.118,FB-PB.2954.147,FB-PB.2954.61,FB-PB…
chr2	FB-PB.2954	FN1	RI	FB-PB.2954;RI:chr2:215371909:215372015-215372109:215372375:-	-0.223955	0.0474525	Down	FB-PB.2954.8	FB-PB.2954.47,FB-PB.2954.164,FB-PB.2954.76,FB-PB.2954.63,FB-PB.2954.167,FB-PB.2954.69,FB-PB.2954.171,FB-PB.2954.1,FB-PB.2954.126,FB-PB.2954.119,FB-PB.2954.109,FB-PB.2954.2,FB-PB.2954.116,FB-PB.2954.129,FB-PB.2954.105,FB-PB.2954.120,FB-PB.2954.142,FB-PB.2954.114,FB-PB.2954.107,FB-PB.2954.31,FB-PB.2954.153,FB-PB.2954.138,FB-PB.2954.149,FB-PB.2954.13,FB-PB.2954.118,FB-PB.2954.147,FB-PB.2954.61,FB-PB…
chr2	FB-PB.2954	FN1	RI	FB-PB.2954;RI:chr2:215371909:215372015-215372109:215372375:-	-0.223955	0.0474525	Down	FB-PB.2954.9	FB-PB.2954.47,FB-PB.2954.164,FB-PB.2954.76,FB-PB.2954.63,FB-PB.2954.167,FB-PB.2954.69,FB-PB.2954.171,FB-PB.2954.1,FB-PB.2954.126,FB-PB.2954.119,FB-PB.2954.109,FB-PB.2954.2,FB-PB.2954.116,FB-PB.2954.129,FB-PB.2954.105,FB-PB.2954.120,FB-PB.2954.142,FB-PB.2954.114,FB-PB.2954.107,FB-PB.2954.31,FB-PB.2954.153,FB-PB.2954.138,FB-PB.2954.149,FB-PB.2954.13,FB-PB.2954.118,FB-PB.2954.147,FB-PB.2954.61,FB-PB…
chr2	FB-PB.2954	FN1	RI	FB-PB.2954;RI:chr2:215371909:215372015-215372109:215372375:-	-0.223955	0.0474525	Down	FB-PB.2954.76	FB-PB.2954.47,FB-PB.2954.164,FB-PB.2954.76,FB-PB.2954.63,FB-PB.2954.167,FB-PB.2954.69,FB-PB.2954.171,FB-PB.2954.1,FB-PB.2954.126,FB-PB.2954.119,FB-PB.2954.109,FB-PB.2954.2,FB-PB.2954.116,FB-PB.2954.129,FB-PB.2954.105,FB-PB.2954.120,FB-PB.2954.142,FB-PB.2954.114,FB-PB.2954.107,FB-PB.2954.31,FB-PB.2954.153,FB-PB.2954.138,FB-PB.2954.149,FB-PB.2954.13,FB-PB.2954.118,FB-PB.2954.147,FB-PB.2954.61,FB-PB…
chr2	FB-PB.2954	FN1	RI	FB-PB.2954;RI:chr2:215371909:215372015-215372109:215372375:-	-0.223955	0.0474525	Down	FB-PB.2954.73	FB-PB.2954.47,FB-PB.2954.164,FB-PB.2954.76,FB-PB.2954.63,FB-PB.2954.167,FB-PB.2954.69,FB-PB.2954.171,FB-PB.2954.1,FB-PB.2954.126,FB-PB.2954.119,FB-PB.2954.109,FB-PB.2954.2,FB-PB.2954.116,FB-PB.2954.129,FB-PB.2954.105,FB-PB.2954.120,FB-PB.2954.142,FB-PB.2954.114,FB-PB.2954.107,FB-PB.2954.31,FB-PB.2954.153,FB-PB.2954.138,FB-PB.2954.149,FB-PB.2954.13,FB-PB.2954.118,FB-PB.2954.147,FB-PB.2954.61,FB-PB…
chr2	FB-PB.2954	FN1	RI	FB-PB.2954;RI:chr2:215371909:215372015-215372109:215372375:-	-0.223955	0.0474525	Down	FB-PB.2954.75	FB-PB.2954.47,FB-PB.2954.164,FB-PB.2954.76,FB-PB.2954.63,FB-PB.2954.167,FB-PB.2954.69,FB-PB.2954.171,FB-PB.2954.1,FB-PB.2954.126,FB-PB.2954.119,FB-PB.2954.109,FB-PB.2954.2,FB-PB.2954.116,FB-PB.2954.129,FB-PB.2954.105,FB-PB.2954.120,FB-PB.2954.142,FB-PB.2954.114,FB-PB.2954.107,FB-PB.2954.31,FB-PB.2954.153,FB-PB.2954.138,FB-PB.2954.149,FB-PB.2954.13,FB-PB.2954.118,FB-PB.2954.147,FB-PB.2954.61,FB-PB…
chr2	FB-PB.2954	FN1	RI	FB-PB.2954;RI:chr2:215371909:215372015-215372109:215372375:-	-0.223955	0.0474525	Down	FB-PB.2954.66	FB-PB.2954.47,FB-PB.2954.164,FB-PB.2954.76,FB-PB.2954.63,FB-PB.2954.167,FB-PB.2954.69,FB-PB.2954.171,FB-PB.2954.1,FB-PB.2954.126,FB-PB.2954.119,FB-PB.2954.109,FB-PB.2954.2,FB-PB.2954.116,FB-PB.2954.129,FB-PB.2954.105,FB-PB.2954.120,FB-PB.2954.142,FB-PB.2954.114,FB-PB.2954.107,FB-PB.2954.31,FB-PB.2954.153,FB-PB.2954.138,FB-PB.2954.149,FB-PB.2954.13,FB-PB.2954.118,FB-PB.2954.147,FB-PB.2954.61,FB-PB…
chr2	FB-PB.2954	FN1	RI	FB-PB.2954;RI:chr2:215371909:215372015-215372109:215372375:-	-0.223955	0.0474525	Down	FB-PB.2954.61	FB-PB.2954.47,FB-PB.2954.164,FB-PB.2954.76,FB-PB.2954.63,FB-PB.2954.167,FB-PB.2954.69,FB-PB.2954.171,FB-PB.2954.1,FB-PB.2954.126,FB-PB.2954.119,FB-PB.2954.109,FB-PB.2954.2,FB-PB.2954.116,FB-PB.2954.129,FB-PB.2954.105,FB-PB.2954.120,FB-PB.2954.142,FB-PB.2954.114,FB-PB.2954.107,FB-PB.2954.31,FB-PB.2954.153,FB-PB.2954.138,FB-PB.2954.149,FB-PB.2954.13,FB-PB.2954.118,FB-PB.2954.147,FB-PB.2954.61,FB-PB…
chr2	FB-PB.2954	FN1	RI	FB-PB.2954;RI:chr2:215371909:215372015-215372109:215372375:-	-0.223955	0.0474525	Down	FB-PB.2954.54	FB-PB.2954.47,FB-PB.2954.164,FB-PB.2954.76,FB-PB.2954.63,FB-PB.2954.167,FB-PB.2954.69,FB-PB.2954.171,FB-PB.2954.1,FB-PB.2954.126,FB-PB.2954.119,FB-PB.2954.109,FB-PB.2954.2,FB-PB.2954.116,FB-PB.2954.129,FB-PB.2954.105,FB-PB.2954.120,FB-PB.2954.142,FB-PB.2954.114,FB-PB.2954.107,FB-PB.2954.31,FB-PB.2954.153,FB-PB.2954.138,FB-PB.2954.149,FB-PB.2954.13,FB-PB.2954.118,FB-PB.2954.147,FB-PB.2954.61,FB-PB…
chr2	FB-PB.2954	FN1	RI	FB-PB.2954;RI:chr2:215371909:215372015-215372109:215372375:-	-0.223955	0.0474525	Down	FB-PB.2954.51	FB-PB.2954.47,FB-PB.2954.164,FB-PB.2954.76,FB-PB.2954.63,FB-PB.2954.167,FB-PB.2954.69,FB-PB.2954.171,FB-PB.2954.1,FB-PB.2954.126,FB-PB.2954.119,FB-PB.2954.109,FB-PB.2954.2,FB-PB.2954.116,FB-PB.2954.129,FB-PB.2954.105,FB-PB.2954.120,FB-PB.2954.142,FB-PB.2954.114,FB-PB.2954.107,FB-PB.2954.31,FB-PB.2954.153,FB-PB.2954.138,FB-PB.2954.149,FB-PB.2954.13,FB-PB.2954.118,FB-PB.2954.147,FB-PB.2954.61,FB-PB…
chr2	FB-PB.2954	FN1	RI	FB-PB.2954;RI:chr2:215371909:215372015-215372109:215372375:-	-0.223955	0.0474525	Down	FB-PB.2954.49	FB-PB.2954.47,FB-PB.2954.164,FB-PB.2954.76,FB-PB.2954.63,FB-PB.2954.167,FB-PB.2954.69,FB-PB.2954.171,FB-PB.2954.1,FB-PB.2954.126,FB-PB.2954.119,FB-PB.2954.109,FB-PB.2954.2,FB-PB.2954.116,FB-PB.2954.129,FB-PB.2954.105,FB-PB.2954.120,FB-PB.2954.142,FB-PB.2954.114,FB-PB.2954.107,FB-PB.2954.31,FB-PB.2954.153,FB-PB.2954.138,FB-PB.2954.149,FB-PB.2954.13,FB-PB.2954.118,FB-PB.2954.147,FB-PB.2954.61,FB-PB…
chr2	FB-PB.2954	FN1	RI	FB-PB.2954;RI:chr2:215371909:215372015-215372109:215372375:-	-0.223955	0.0474525	Down	FB-PB.2954.41	FB-PB.2954.47,FB-PB.2954.164,FB-PB.2954.76,FB-PB.2954.63,FB-PB.2954.167,FB-PB.2954.69,FB-PB.2954.171,FB-PB.2954.1,FB-PB.2954.126,FB-PB.2954.119,FB-PB.2954.109,FB-PB.2954.2,FB-PB.2954.116,FB-PB.2954.129,FB-PB.2954.105,FB-PB.2954.120,FB-PB.2954.142,FB-PB.2954.114,FB-PB.2954.107,FB-PB.2954.31,FB-PB.2954.153,FB-PB.2954.138,FB-PB.2954.149,FB-PB.2954.13,FB-PB.2954.118,FB-PB.2954.147,FB-PB.2954.61,FB-PB…
chr2	FB-PB.2954	FN1	RI	FB-PB.2954;RI:chr2:215371909:215372015-215372109:215372375:-	-0.223955	0.0474525	Down	FB-PB.2954.46	FB-PB.2954.47,FB-PB.2954.164,FB-PB.2954.76,FB-PB.2954.63,FB-PB.2954.167,FB-PB.2954.69,FB-PB.2954.171,FB-PB.2954.1,FB-PB.2954.126,FB-PB.2954.119,FB-PB.2954.109,FB-PB.2954.2,FB-PB.2954.116,FB-PB.2954.129,FB-PB.2954.105,FB-PB.2954.120,FB-PB.2954.142,FB-PB.2954.114,FB-PB.2954.107,FB-PB.2954.31,FB-PB.2954.153,FB-PB.2954.138,FB-PB.2954.149,FB-PB.2954.13,FB-PB.2954.118,FB-PB.2954.147,FB-PB.2954.61,FB-PB…
chr2	FB-PB.2954	FN1	RI	FB-PB.2954;RI:chr2:215371909:215372015-215372109:215372375:-	-0.223955	0.0474525	Down	FB-PB.2954.35	FB-PB.2954.47,FB-PB.2954.164,FB-PB.2954.76,FB-PB.2954.63,FB-PB.2954.167,FB-PB.2954.69,FB-PB.2954.171,FB-PB.2954.1,FB-PB.2954.126,FB-PB.2954.119,FB-PB.2954.109,FB-PB.2954.2,FB-PB.2954.116,FB-PB.2954.129,FB-PB.2954.105,FB-PB.2954.120,FB-PB.2954.142,FB-PB.2954.114,FB-PB.2954.107,FB-PB.2954.31,FB-PB.2954.153,FB-PB.2954.138,FB-PB.2954.149,FB-PB.2954.13,FB-PB.2954.118,FB-PB.2954.147,FB-PB.2954.61,FB-PB…
chr2	FB-PB.2954	FN1	RI	FB-PB.2954;RI:chr2:215371909:215372015-215372109:215372375:-	-0.223955	0.0474525	Down	FB-PB.2954.144	FB-PB.2954.47,FB-PB.2954.164,FB-PB.2954.76,FB-PB.2954.63,FB-PB.2954.167,FB-PB.2954.69,FB-PB.2954.171,FB-PB.2954.1,FB-PB.2954.126,FB-PB.2954.119,FB-PB.2954.109,FB-PB.2954.2,FB-PB.2954.116,FB-PB.2954.129,FB-PB.2954.105,FB-PB.2954.120,FB-PB.2954.142,FB-PB.2954.114,FB-PB.2954.107,FB-PB.2954.31,FB-PB.2954.153,FB-PB.2954.138,FB-PB.2954.149,FB-PB.2954.13,FB-PB.2954.118,FB-PB.2954.147,FB-PB.2954.61,FB-PB…
chr2	FB-PB.2954	FN1	RI	FB-PB.2954;RI:chr2:215371909:215372015-215372109:215372375:-	-0.223955	0.0474525	Down	FB-PB.2954.142	FB-PB.2954.47,FB-PB.2954.164,FB-PB.2954.76,FB-PB.2954.63,FB-PB.2954.167,FB-PB.2954.69,FB-PB.2954.171,FB-PB.2954.1,FB-PB.2954.126,FB-PB.2954.119,FB-PB.2954.109,FB-PB.2954.2,FB-PB.2954.116,FB-PB.2954.129,FB-PB.2954.105,FB-PB.2954.120,FB-PB.2954.142,FB-PB.2954.114,FB-PB.2954.107,FB-PB.2954.31,FB-PB.2954.153,FB-PB.2954.138,FB-PB.2954.149,FB-PB.2954.13,FB-PB.2954.118,FB-PB.2954.147,FB-PB.2954.61,FB-PB…
chr2	FB-PB.2954	FN1	RI	FB-PB.2954;RI:chr2:215371909:215372015-215372109:215372375:-	-0.223955	0.0474525	Down	FB-PB.2954.125	FB-PB.2954.47,FB-PB.2954.164,FB-PB.2954.76,FB-PB.2954.63,FB-PB.2954.167,FB-PB.2954.69,FB-PB.2954.171,FB-PB.2954.1,FB-PB.2954.126,FB-PB.2954.119,FB-PB.2954.109,FB-PB.2954.2,FB-PB.2954.116,FB-PB.2954.129,FB-PB.2954.105,FB-PB.2954.120,FB-PB.2954.142,FB-PB.2954.114,FB-PB.2954.107,FB-PB.2954.31,FB-PB.2954.153,FB-PB.2954.138,FB-PB.2954.149,FB-PB.2954.13,FB-PB.2954.118,FB-PB.2954.147,FB-PB.2954.61,FB-PB…
chr2	FB-PB.2954	FN1	RI	FB-PB.2954;RI:chr2:215371909:215372015-215372109:215372375:-	-0.223955	0.0474525	Down	FB-PB.2954.118	FB-PB.2954.47,FB-PB.2954.164,FB-PB.2954.76,FB-PB.2954.63,FB-PB.2954.167,FB-PB.2954.69,FB-PB.2954.171,FB-PB.2954.1,FB-PB.2954.126,FB-PB.2954.119,FB-PB.2954.109,FB-PB.2954.2,FB-PB.2954.116,FB-PB.2954.129,FB-PB.2954.105,FB-PB.2954.120,FB-PB.2954.142,FB-PB.2954.114,FB-PB.2954.107,FB-PB.2954.31,FB-PB.2954.153,FB-PB.2954.138,FB-PB.2954.149,FB-PB.2954.13,FB-PB.2954.118,FB-PB.2954.147,FB-PB.2954.61,FB-PB…
chr2	FB-PB.2954	FN1	RI	FB-PB.2954;RI:chr2:215371909:215372015-215372109:215372375:-	-0.223955	0.0474525	Down	FB-PB.2954.91	FB-PB.2954.47,FB-PB.2954.164,FB-PB.2954.76,FB-PB.2954.63,FB-PB.2954.167,FB-PB.2954.69,FB-PB.2954.171,FB-PB.2954.1,FB-PB.2954.126,FB-PB.2954.119,FB-PB.2954.109,FB-PB.2954.2,FB-PB.2954.116,FB-PB.2954.129,FB-PB.2954.105,FB-PB.2954.120,FB-PB.2954.142,FB-PB.2954.114,FB-PB.2954.107,FB-PB.2954.31,FB-PB.2954.153,FB-PB.2954.138,FB-PB.2954.149,FB-PB.2954.13,FB-PB.2954.118,FB-PB.2954.147,FB-PB.2954.61,FB-PB…
chr2	FB-PB.2954	FN1	RI	FB-PB.2954;RI:chr2:215371909:215372015-215372109:215372375:-	-0.223955	0.0474525	Down	FB-PB.2954.104	FB-PB.2954.47,FB-PB.2954.164,FB-PB.2954.76,FB-PB.2954.63,FB-PB.2954.167,FB-PB.2954.69,FB-PB.2954.171,FB-PB.2954.1,FB-PB.2954.126,FB-PB.2954.119,FB-PB.2954.109,FB-PB.2954.2,FB-PB.2954.116,FB-PB.2954.129,FB-PB.2954.105,FB-PB.2954.120,FB-PB.2954.142,FB-PB.2954.114,FB-PB.2954.107,FB-PB.2954.31,FB-PB.2954.153,FB-PB.2954.138,FB-PB.2954.149,FB-PB.2954.13,FB-PB.2954.118,FB-PB.2954.147,FB-PB.2954.61,FB-PB…
chr2	FB-PB.2954	FN1	RI	FB-PB.2954;RI:chr2:215371909:215372015-215372109:215372375:-	-0.223955	0.0474525	Down	FB-PB.2954.16	FB-PB.2954.47,FB-PB.2954.164,FB-PB.2954.76,FB-PB.2954.63,FB-PB.2954.167,FB-PB.2954.69,FB-PB.2954.171,FB-PB.2954.1,FB-PB.2954.126,FB-PB.2954.119,FB-PB.2954.109,FB-PB.2954.2,FB-PB.2954.116,FB-PB.2954.129,FB-PB.2954.105,FB-PB.2954.120,FB-PB.2954.142,FB-PB.2954.114,FB-PB.2954.107,FB-PB.2954.31,FB-PB.2954.153,FB-PB.2954.138,FB-PB.2954.149,FB-PB.2954.13,FB-PB.2954.118,FB-PB.2954.147,FB-PB.2954.61,FB-PB…
chr2	FB-PB.2954	FN1	RI	FB-PB.2954;RI:chr2:215371909:215372015-215372109:215372375:-	-0.223955	0.0474525	Down	FB-PB.2954.165	FB-PB.2954.47,FB-PB.2954.164,FB-PB.2954.76,FB-PB.2954.63,FB-PB.2954.167,FB-PB.2954.69,FB-PB.2954.171,FB-PB.2954.1,FB-PB.2954.126,FB-PB.2954.119,FB-PB.2954.109,FB-PB.2954.2,FB-PB.2954.116,FB-PB.2954.129,FB-PB.2954.105,FB-PB.2954.120,FB-PB.2954.142,FB-PB.2954.114,FB-PB.2954.107,FB-PB.2954.31,FB-PB.2954.153,FB-PB.2954.138,FB-PB.2954.149,FB-PB.2954.13,FB-PB.2954.118,FB-PB.2954.147,FB-PB.2954.61,FB-PB…
chr2	FB-PB.2954	FN1	RI	FB-PB.2954;RI:chr2:215371909:215372015-215372109:215372375:-	-0.223955	0.0474525	Down	FB-PB.2954.162	FB-PB.2954.47,FB-PB.2954.164,FB-PB.2954.76,FB-PB.2954.63,FB-PB.2954.167,FB-PB.2954.69,FB-PB.2954.171,FB-PB.2954.1,FB-PB.2954.126,FB-PB.2954.119,FB-PB.2954.109,FB-PB.2954.2,FB-PB.2954.116,FB-PB.2954.129,FB-PB.2954.105,FB-PB.2954.120,FB-PB.2954.142,FB-PB.2954.114,FB-PB.2954.107,FB-PB.2954.31,FB-PB.2954.153,FB-PB.2954.138,FB-PB.2954.149,FB-PB.2954.13,FB-PB.2954.118,FB-PB.2954.147,FB-PB.2954.61,FB-PB…
chr2	FB-PB.2954	FN1	RI	FB-PB.2954;RI:chr2:215371909:215372015-215372109:215372375:-	-0.223955	0.0474525	Down	FB-PB.2954.156	FB-PB.2954.47,FB-PB.2954.164,FB-PB.2954.76,FB-PB.2954.63,FB-PB.2954.167,FB-PB.2954.69,FB-PB.2954.171,FB-PB.2954.1,FB-PB.2954.126,FB-PB.2954.119,FB-PB.2954.109,FB-PB.2954.2,FB-PB.2954.116,FB-PB.2954.129,FB-PB.2954.105,FB-PB.2954.120,FB-PB.2954.142,FB-PB.2954.114,FB-PB.2954.107,FB-PB.2954.31,FB-PB.2954.153,FB-PB.2954.138,FB-PB.2954.149,FB-PB.2954.13,FB-PB.2954.118,FB-PB.2954.147,FB-PB.2954.61,FB-PB…
chr2	FB-PB.2954	FN1	RI	FB-PB.2954;RI:chr2:215371909:215372015-215372109:215372375:-	-0.223955	0.0474525	Down	FB-PB.2954.157	FB-PB.2954.47,FB-PB.2954.164,FB-PB.2954.76,FB-PB.2954.63,FB-PB.2954.167,FB-PB.2954.69,FB-PB.2954.171,FB-PB.2954.1,FB-PB.2954.126,FB-PB.2954.119,FB-PB.2954.109,FB-PB.2954.2,FB-PB.2954.116,FB-PB.2954.129,FB-PB.2954.105,FB-PB.2954.120,FB-PB.2954.142,FB-PB.2954.114,FB-PB.2954.107,FB-PB.2954.31,FB-PB.2954.153,FB-PB.2954.138,FB-PB.2954.149,FB-PB.2954.13,FB-PB.2954.118,FB-PB.2954.147,FB-PB.2954.61,FB-PB…
chr2	FB-PB.2954	FN1	RI	FB-PB.2954;RI:chr2:215371909:215372015-215372109:215372375:-	-0.223955	0.0474525	Down	FB-PB.2954.31	FB-PB.2954.47,FB-PB.2954.164,FB-PB.2954.76,FB-PB.2954.63,FB-PB.2954.167,FB-PB.2954.69,FB-PB.2954.171,FB-PB.2954.1,FB-PB.2954.126,FB-PB.2954.119,FB-PB.2954.109,FB-PB.2954.2,FB-PB.2954.116,FB-PB.2954.129,FB-PB.2954.105,FB-PB.2954.120,FB-PB.2954.142,FB-PB.2954.114,FB-PB.2954.107,FB-PB.2954.31,FB-PB.2954.153,FB-PB.2954.138,FB-PB.2954.149,FB-PB.2954.13,FB-PB.2954.118,FB-PB.2954.147,FB-PB.2954.61,FB-PB…
chr2	FB-PB.2954	FN1	RI	FB-PB.2954;RI:chr2:215371909:215372015-215372109:215372375:-	-0.223955	0.0474525	Down	FB-PB.2954.169	FB-PB.2954.47,FB-PB.2954.164,FB-PB.2954.76,FB-PB.2954.63,FB-PB.2954.167,FB-PB.2954.69,FB-PB.2954.171,FB-PB.2954.1,FB-PB.2954.126,FB-PB.2954.119,FB-PB.2954.109,FB-PB.2954.2,FB-PB.2954.116,FB-PB.2954.129,FB-PB.2954.105,FB-PB.2954.120,FB-PB.2954.142,FB-PB.2954.114,FB-PB.2954.107,FB-PB.2954.31,FB-PB.2954.153,FB-PB.2954.138,FB-PB.2954.149,FB-PB.2954.13,FB-PB.2954.118,FB-PB.2954.147,FB-PB.2954.61,FB-PB…
chr2	FB-PB.2954	FN1	RI	FB-PB.2954;RI:chr2:215371909:215372015-215372109:215372375:-	-0.223955	0.0474525	Down	FB-PB.2954.167	FB-PB.2954.47,FB-PB.2954.164,FB-PB.2954.76,FB-PB.2954.63,FB-PB.2954.167,FB-PB.2954.69,FB-PB.2954.171,FB-PB.2954.1,FB-PB.2954.126,FB-PB.2954.119,FB-PB.2954.109,FB-PB.2954.2,FB-PB.2954.116,FB-PB.2954.129,FB-PB.2954.105,FB-PB.2954.120,FB-PB.2954.142,FB-PB.2954.114,FB-PB.2954.107,FB-PB.2954.31,FB-PB.2954.153,FB-PB.2954.138,FB-PB.2954.149,FB-PB.2954.13,FB-PB.2954.118,FB-PB.2954.147,FB-PB.2954.61,FB-PB…
chr22	FB-PB.3259	RANGAP1	A5	FB-PB.3259;A5:chr22:41281082-41285544:41281082-41285986:-	-0.207505	0.0404595	Down	FB-PB.3259.2	FB-PB.3259.1,FB-PB.3259.2
chr17	FB-PB.2296	CANT1	RI	FB-PB.2296;RI:chr17:78996992:78997644-78997840:78997963:-	-0.203534	0.037962	Down	FB-PB.2296.1	FB-PB.2296.2,FB-PB.2296.1
chr1	FB-PB.368	COPA	RI	FB-PB.368;RI:chr1:160289138:160289152-160289164:160290216:-	-0.200991	0.0254745	Down	FB-PB.368.1	FB-PB.368.3,FB-PB.368.2,FB-PB.368.1
chr1	FB-PB.368	COPA	RI	FB-PB.368;RI:chr1:160289138:160289152-160289164:160290216:-	-0.200991	0.0254745	Down	FB-PB.368.2	FB-PB.368.3,FB-PB.368.2,FB-PB.368.1
chr12	FB-PB.1309	TXNRD1	A5	FB-PB.1309;A5:chr12:104287346-104288931:104287109-104288931:+	-0.20013	0.041958	Down	FB-PB.1309.1	FB-PB.1309.1,FB-PB.1309.2
chr6	FB-PB.4304	NT5E	SE	FB-PB.4304;SE:chr6:85489599-85490508:85490657-85491977:+	-0.191876	0.0244755	Down	FB-PB.4304.2	FB-PB.4304.2,FB-PB.4304.5,FB-PB.4304.7,FB-PB.4304.8,FB-PB.4304.6
chr6	FB-PB.4304	NT5E	SE	FB-PB.4304;SE:chr6:85489599-85490508:85490657-85491977:+	-0.191876	0.0244755	Down	FB-PB.4304.5	FB-PB.4304.2,FB-PB.4304.5,FB-PB.4304.7,FB-PB.4304.8,FB-PB.4304.6
chr6	FB-PB.4304	NT5E	SE	FB-PB.4304;SE:chr6:85489599-85490508:85490657-85491977:+	-0.191876	0.0244755	Down	FB-PB.4304.7	FB-PB.4304.2,FB-PB.4304.5,FB-PB.4304.7,FB-PB.4304.8,FB-PB.4304.6
chr6	FB-PB.4304	NT5E	SE	FB-PB.4304;SE:chr6:85489599-85490508:85490657-85491977:+	-0.191876	0.0244755	Down	FB-PB.4304.8	FB-PB.4304.2,FB-PB.4304.5,FB-PB.4304.7,FB-PB.4304.8,FB-PB.4304.6
chr13	FB-PB.1425	HSPH1	A5	FB-PB.1425;A5:chr13:31158863-31161476:31158863-31161982:-	-0.183252	0.0224775	Down	FB-PB.1425.1	FB-PB.1425.1,FB-PB.1425.4,FB-PB.1425.6,FB-PB.1425.5
chr13	FB-PB.1425	HSPH1	A5	FB-PB.1425;A5:chr13:31158863-31161476:31158863-31161982:-	-0.183252	0.0224775	Down	FB-PB.1425.5	FB-PB.1425.1,FB-PB.1425.4,FB-PB.1425.6,FB-PB.1425.5
chr13	FB-PB.1425	HSPH1	A5	FB-PB.1425;A5:chr13:31158863-31161476:31158863-31161982:-	-0.183252	0.0224775	Down	FB-PB.1425.6	FB-PB.1425.1,FB-PB.1425.4,FB-PB.1425.6,FB-PB.1425.5
chr1	FB-PB.28	CLSTN1	SE	FB-PB.28;SE:chr1:9755309-9756481:9756510-9773272:-	-0.170941	0.0174825	Down	FB-PB.28.1	FB-PB.28.3,FB-PB.28.2,FB-PB.28.1
chr1	FB-PB.28	CLSTN1	SE	FB-PB.28;SE:chr1:9755309-9756481:9756510-9773272:-	-0.170941	0.0174825	Down	FB-PB.28.3	FB-PB.28.3,FB-PB.28.2,FB-PB.28.1
chr9	FB-PB.5136	FNBP1	A3	FB-PB.5136;A3:chr9:129924026-129924960:129923996-129924960:-	-0.156627	0.0254745	Down	FB-PB.5136.2	FB-PB.5136.3,FB-PB.5136.2
chr1	FB-PB.420	GLUL	SE	FB-PB.420;SE:chr1:182388750-182390497:182390852-182391679:-	-0.153753	0.0114885	Down	FB-PB.420.2	FB-PB.420.3,FB-PB.420.2,FB-PB.420.1
chr9	FB-PB.5132	C9orf78	A5	FB-PB.5132;A5:chr9:129828252-129829205:129828252-129829236:-	-0.149045	0.042957	Down	FB-PB.5132.2	FB-PB.5132.1,FB-PB.5132.2
chr19	FB-PB.2441	TRIP10	SE	FB-PB.2441;SE:chr19:6744994-6746029:6746196-6746452:+	-0.148228	0.017982	Down	FB-PB.2441.2	FB-PB.2441.2,FB-PB.2441.1
chr10	FB-PB.672	P4HA1	SE	FB-PB.672;SE:chr10:73043957-73044981:73045051-73046925:-	-0.141969	0.0484515	Down	FB-PB.672.2	FB-PB.672.2,FB-PB.672.1
chr14	FB-PB.1531	HNRNPC	SE	FB-PB.1531;SE:chr14:21234229-21262601:21263829-21269298:-	-0.14179	0.027972	Down	FB-PB.1531.4	FB-PB.1531.6,FB-PB.1531.5,FB-PB.1531.4
chr2	FB-PB.2860	RBMS1	A5	FB-PB.2860;A5:chr2:160285044-160286969:160285044-160286978:-	-0.12602	0.047952	Down	FB-PB.2860.2	FB-PB.2860.3,FB-PB.2860.5,FB-PB.2860.2,FB-PB.2860.1,FB-PB.2860.8,FB-PB.2860.4,FB-PB.2860.9,FB-PB.2860.10,FB-PB.2860.6,FB-PB.2860.12,FB-PB.2860.7
chr2	FB-PB.2860	RBMS1	A5	FB-PB.2860;A5:chr2:160285044-160286969:160285044-160286978:-	-0.12602	0.047952	Down	FB-PB.2860.4	FB-PB.2860.3,FB-PB.2860.5,FB-PB.2860.2,FB-PB.2860.1,FB-PB.2860.8,FB-PB.2860.4,FB-PB.2860.9,FB-PB.2860.10,FB-PB.2860.6,FB-PB.2860.12,FB-PB.2860.7
chr2	FB-PB.2860	RBMS1	A5	FB-PB.2860;A5:chr2:160285044-160286969:160285044-160286978:-	-0.12602	0.047952	Down	FB-PB.2860.5	FB-PB.2860.3,FB-PB.2860.5,FB-PB.2860.2,FB-PB.2860.1,FB-PB.2860.8,FB-PB.2860.4,FB-PB.2860.9,FB-PB.2860.10,FB-PB.2860.6,FB-PB.2860.12,FB-PB.2860.7
chr2	FB-PB.2860	RBMS1	A5	FB-PB.2860;A5:chr2:160285044-160286969:160285044-160286978:-	-0.12602	0.047952	Down	FB-PB.2860.7	FB-PB.2860.3,FB-PB.2860.5,FB-PB.2860.2,FB-PB.2860.1,FB-PB.2860.8,FB-PB.2860.4,FB-PB.2860.9,FB-PB.2860.10,FB-PB.2860.6,FB-PB.2860.12,FB-PB.2860.7
chr2	FB-PB.2860	RBMS1	A5	FB-PB.2860;A5:chr2:160285044-160286969:160285044-160286978:-	-0.12602	0.047952	Down	FB-PB.2860.6	FB-PB.2860.3,FB-PB.2860.5,FB-PB.2860.2,FB-PB.2860.1,FB-PB.2860.8,FB-PB.2860.4,FB-PB.2860.9,FB-PB.2860.10,FB-PB.2860.6,FB-PB.2860.12,FB-PB.2860.7
chr2	FB-PB.2860	RBMS1	A5	FB-PB.2860;A5:chr2:160285044-160286969:160285044-160286978:-	-0.12602	0.047952	Down	FB-PB.2860.10	FB-PB.2860.3,FB-PB.2860.5,FB-PB.2860.2,FB-PB.2860.1,FB-PB.2860.8,FB-PB.2860.4,FB-PB.2860.9,FB-PB.2860.10,FB-PB.2860.6,FB-PB.2860.12,FB-PB.2860.7
chr2	FB-PB.2860	RBMS1	A5	FB-PB.2860;A5:chr2:160285044-160286969:160285044-160286978:-	-0.12602	0.047952	Down	FB-PB.2860.9	FB-PB.2860.3,FB-PB.2860.5,FB-PB.2860.2,FB-PB.2860.1,FB-PB.2860.8,FB-PB.2860.4,FB-PB.2860.9,FB-PB.2860.10,FB-PB.2860.6,FB-PB.2860.12,FB-PB.2860.7
chr11	FB-PB.936	GANAB	SE	FB-PB.936;SE:chr11:62633514-62634310:62634375-62634821:-	-0.116422	0.041958	Down	FB-PB.936.1	FB-PB.936.2,FB-PB.936.1
chr3	FB-PB.3623	EIF4G1	A3	FB-PB.3623;A3:chr3:184323241-184323405:184323241-184323408:+	-0.110998	0.0499501	Down	FB-PB.3623.6	FB-PB.3623.9,FB-PB.3623.5,FB-PB.3623.4,FB-PB.3623.7,FB-PB.3623.6,FB-PB.3623.1,FB-PB.3623.3,FB-PB.3623.8
chr3	FB-PB.3623	EIF4G1	A3	FB-PB.3623;A3:chr3:184323241-184323405:184323241-184323408:+	-0.110998	0.0499501	Down	FB-PB.3623.7	FB-PB.3623.9,FB-PB.3623.5,FB-PB.3623.4,FB-PB.3623.7,FB-PB.3623.6,FB-PB.3623.1,FB-PB.3623.3,FB-PB.3623.8
chr14	FB-PB.1531	HNRNPC	SE	FB-PB.1531;SE:chr14:21234229-21263311:21263336-21269298:-	-0.102825	0.038961	Down	FB-PB.1531.1	FB-PB.1531.6,FB-PB.1531.1,FB-PB.1531.3,FB-PB.1531.5
chr14	FB-PB.1531	HNRNPC	SE	FB-PB.1531;SE:chr14:21234229-21263311:21263336-21269298:-	-0.102825	0.038961	Down	FB-PB.1531.3	FB-PB.1531.6,FB-PB.1531.1,FB-PB.1531.3,FB-PB.1531.5
chr17	FB-PB.2152	ZNF207	SE	FB-PB.2152;SE:chr17:32365487-32366665:32366757-32367772:+	-0.0985568	0.043956	Down	FB-PB.2152.2	FB-PB.2152.1,FB-PB.2152.2

## Sheet: Table S5.3
Table S5.3 Significant isoform-switching events in keratinocytes between post-wound day 7 and normal skin.
isoforms	GeneName	KC_SK_tpm_isoform-KC_WK_tpm_isoform_dPSI	KC_SK_tpm_isoform-KC_WK_tpm_isoform_p-val	Sig
KC-PB.2713.2	ZNF341	-0.747151	0.00799201	Down
KC-PB.3597.3	KIF20A	-0.708734	0.00674326	Down
KC-PB.97.1	PTP4A2	-0.703957	0.000749251	Down
KC-PB.2904.3	GTSE1	-0.645822	0.00749251	Down
KC-PB.4107.2	AGPAT5	-0.537438	0.00974026	Down
KC-PB.1289.1	RCBTB1	-0.525057	0.010989	Down
KC-PB.4636.1	IL13RA1	-0.513613	0	Down
KC-PB.1910.2	SPECC1	-0.498173	0.0127373	Down
KC-PB.3780.4	TTK	-0.490189	0.0457043	Down
KC-PB.4549.2	MID1	-0.488808	0.024975	Down
KC-PB.2695.5	SEC23B	-0.483829	0.00624376	Down
KC-PB.3162.1	GOLIM4	-0.481716	0.00599401	Down
KC-PB.117.3	AKIRIN1	-0.470585	0.0044955	Down
KC-PB.598.1	P4HA1	-0.466496	0.013986	Down
KC-PB.3324.2	ENSG00000251095	-0.445726	0.0404595	Down
KC-PB.3296.3	EPGN	-0.44545	0.037962	Down
KC-PB.164.4	NFIA	-0.419066	0	Down
KC-PB.1974.1	EFTUD2	-0.406992	0.011988	Down
KC-PB.2422.1	GFPT1	-0.392048	0.010989	Down
KC-PB.348.5	MPZL1	-0.38011	0.013986	Down
KC-PB.4005.6	ARPC1B	-0.374816	0.011988	Down
KC-PB.2580.3	GTF3C3	-0.373297	0.02997	Down
KC-PB.3660.2	ERGIC1	-0.372167	0.00549451	Down
KC-PB.454.5	LBR	-0.366832	0.01998	Down
KC-PB.3721.1	FKBP5	-0.36505	0.00799201	Down
KC-PB.2079.2	RAB31	-0.361119	0.0234765	Down
KC-PB.2553.2	HNRNPA3	-0.359106	0	Down
KC-PB.4198.5	ASPH	-0.35279	0.013986	Down
KC-PB.3308.2	CCNI	-0.349686	0.00224775	Down
KC-PB.4195.1	RAB2A	-0.34907	0.0034965	Down
KC-PB.4262.3	FAM83A	-0.345042	0.0254745	Down
KC-PB.2402.1	PNPT1	-0.344091	0.0124875	Down
KC-PB.3677.1	EXOC2	-0.340064	0.024975	Down
KC-PB.3245.2	NCAPG	-0.33961	0.033966	Down
KC-PB.399.1	NEK7	-0.336406	0.014985	Down
KC-PB.1931.4	AP2B1	-0.333043	0.0244755	Down
KC-PB.4057.2	TMEM209	-0.331993	0.02997	Down
KC-PB.143.1	CMPK1	-0.318536	0.020979	Down
KC-PB.1851.1	GEMIN4	-0.314374	0.013986	Down
KC-PB.809.2	FAM111B	-0.310829	0.0224775	Down
KC-PB.2548.2	SP3	-0.301705	0.0024975	Down
KC-PB.3510.2	UTP15	-0.298905	0.036963	Down
KC-PB.3900.1	RNF216	-0.296106	0.018981	Down
KC-PB.3560.1	REEP5	-0.294575	0.00599401	Down
KC-PB.335.1	DCAF8	-0.29205	0.032967	Down
KC-PB.1936.1	DDX52	-0.291174	0.022977	Down
KC-PB.1800.3	AARS1	-0.287555	0.017982	Down
KC-PB.4285.1	AK3	-0.287474	0.00549451	Down
KC-PB.4179.3	HOOK3	-0.283262	0.0454545	Down
KC-PB.1330.1	ERCC5	-0.282108	0.0174825	Down
KC-PB.478.1	GGPS1	-0.280937	0.0174825	Down
KC-PB.3626.2	TCERG1	-0.278475	0.010989	Down
KC-PB.2154.2	SERPINB8	-0.278105	0.0154845	Down
KC-PB.1131.1	UBE2N	-0.278027	0.00999001	Down
KC-PB.2764.2	STX16	-0.27316	0.0354645	Down
KC-PB.3901.1	PMS2	-0.271352	0.0144855	Down
KC-PB.3691.2	NUP153	-0.271343	0.0114885	Down
KC-PB.3362.1	CCNA2	-0.270682	0.02997	Down
KC-PB.625.2	IFIT3	-0.270487	0.0304695	Down
KC-PB.2743.12	YWHAB	-0.268701	0.010989	Down
KC-PB.2017.2	METTL2A	-0.266234	0.0124875	Down
KC-PB.432.2	DTL	-0.265612	0.0304695	Down
KC-PB.2036.1	SOX9	-0.264496	0.0114885	Down
KC-PB.698.2	DENND10	-0.262066	0.0144855	Down
KC-PB.3308.3	CCNI	-0.261525	0.002997	Down
KC-PB.2231.1	ELL	-0.261428	0.041958	Down
KC-PB.3305.1	SCARB2	-0.259244	0.017982	Down
KC-PB.751.1	FAR1	-0.2584	0.0457043	Down
KC-PB.1978.1	NPEPPS	-0.257985	0.043956	Down
KC-PB.50.6	HP1BP3	-0.25771	0.041958	Down
KC-PB.367.1	KIAA0040	-0.256236	0.032967	Down
KC-PB.1543.1	EHD4	-0.256048	0.044955	Down
KC-PB.2896.2	TTLL12	-0.253429	0.00999001	Down
KC-PB.3912.1	TMEM106B	-0.253259	0.0144855	Down
KC-PB.2398.3	RTN4	-0.252133	0.00674326	Down
KC-PB.893.1	CEP57	-0.252038	0.045954	Down
KC-PB.1859.1	PAFAH1B1	-0.251792	0.023976	Down
KC-PB.3354.2	ELOVL6	-0.250466	0.0254745	Down
KC-PB.1726.1	EARS2	-0.24981	0.038961	Down
KC-PB.824.2	MTA2	-0.249407	0.025974	Down
KC-PB.4313.2	ACO1	-0.24845	0.0384615	Down
KC-PB.1666.3	FAM234A	-0.24748	0.0314685	Down
KC-PB.104.1	SFPQ	-0.247424	0.002997	Down
KC-PB.156.2	DHCR24	-0.246128	0.000999001	Down
KC-PB.1698.1	SNN	-0.245796	0.030969	Down
KC-PB.3126.1	COPB2	-0.245394	0.0234765	Down
KC-PB.4005.3	ARPC1B	-0.244416	0.033966	Down
KC-PB.3885.2	TMEM181	-0.244244	0.024975	Down
KC-PB.1644.2	FANCI	-0.243517	0.0494505	Down
KC-PB.3632.5	CSNK1A1	-0.243338	0.0104895	Down
KC-PB.3208.2	UBXN7	-0.242943	0.0194805	Down
KC-PB.4056.2	CALU	-0.24225	0.043956	Down
KC-PB.902.2	ALKBH8	-0.241187	0.0454545	Down
KC-PB.77.2	FAM76A	-0.240701	0.021978	Down
KC-PB.3287.2	REST	-0.238813	0.023976	Down
KC-PB.2104.3	DSC3	-0.238398	0.0104895	Down
KC-PB.4047.2	PTPRZ1	-0.237559	0.0104895	Down
KC-PB.3681.2	RIOK1	-0.236236	0.0474525	Down
KC-PB.102.2	AK2	-0.234268	0.0184815	Down
KC-PB.1717.2	METTL9	-0.233466	0.043956	Down
KC-PB.3969.4	ENSG00000290832	-0.232775	0.036963	Down
KC-PB.966.7	CCND2	-0.232444	0.0104895	Down
KC-PB.2928.3	XPC	-0.231872	0.0424575	Down
KC-PB.730.1	RRM1	-0.230423	0.024975	Down
KC-PB.854.1	CCND1	-0.228075	0.00499501	Down
KC-PB.913.2	DDX10	-0.228064	0.0434565	Down
KC-PB.4095.3	ABCF2	-0.2253	0.035964	Down
KC-PB.2388.3	EPAS1	-0.224305	0.0164835	Down
KC-PB.1970.1	UBTF	-0.2231	0.0247253	Down
KC-PB.1955.1	KAT2A	-0.22002	0.0334665	Down
KC-PB.217.4	ZNF644	-0.218287	0.0397103	Down
KC-PB.183.3	GNG12	-0.218259	0.00974026	Down
KC-PB.1446.4	ZFP36L1	-0.218034	0.003996	Down
KC-PB.2035.3	PRKAR1A	-0.218018	0.01998	Down
KC-PB.3765.1	ZNF451	-0.217134	0.044955	Down
KC-PB.4378.3	NCBP1	-0.216334	0.047952	Down
KC-PB.948.1	PUS3	-0.216106	0.045954	Down
KC-PB.2872.2	TMEM184B	-0.215385	0.045954	Down
KC-PB.112.2	MTF1	-0.213447	0.043956	Down
KC-PB.2444.2	PTCD3	-0.213357	0.0334665	Down
KC-PB.2106.2	DSG3	-0.213343	0.031968	Down
KC-PB.4378.1	NCBP1	-0.209142	0.047952	Down
KC-PB.103.2	ZMYM6	-0.208121	0.044955	Down
KC-PB.1863.2	UBE2G1	-0.206639	0.045954	Down
KC-PB.2326.1	RRM2	-0.205922	0.0364635	Down
KC-PB.3750.2	CD2AP	-0.205666	0.0344655	Down
KC-PB.3774.2	CD109	-0.205424	0.0134865	Down
KC-PB.1783.2	SLC12A4	-0.204095	0.035964	Down
KC-PB.1069.1	RNF41	-0.203452	0.047952	Down
KC-PB.1794.2	VPS4A	-0.201688	0.026973	Down
KC-PB.2569.1	NCKAP1	-0.201056	0.00949051	Down
KC-PB.4350.1	UBQLN1	-0.200311	0.0154845	Down
KC-PB.3733.3	MRPS10	-0.199635	0.0144855	Down
KC-PB.4043.7	CAV1	-0.198559	0.041958	Down
KC-PB.3882.1	SNX9	-0.198356	0.0374625	Down
KC-PB.3200.1	IL1RAP	-0.194928	0.0284715	Down
KC-PB.4176.2	SLC20A2	-0.193203	0.0472028	Down
KC-PB.2854.1	ASCC2	-0.192945	0.03996	Down
KC-PB.4641.3	LAMP2	-0.192704	0.03996	Down
KC-PB.2989.1	MAP4	-0.191381	0.0104895	Down
KC-PB.2582.5	SF3B1	-0.190862	0.0284715	Down
KC-PB.4364.3	BICD2	-0.190805	0.032967	Down
KC-PB.604.1	AP3M1	-0.189979	0.046953	Down
KC-PB.1478.2	GTF2A1	-0.186516	0.024975	Down
KC-PB.294.1	ANP32E	-0.183965	0.033966	Down
KC-PB.2003.2	SRSF1	-0.182271	0.0154845	Down
KC-PB.2488.1	DDX18	-0.181251	0.034965	Down
KC-PB.620.1	GLUD1	-0.18078	0.02997	Down
KC-PB.4426.1	HSPA5	-0.179788	0.0322178	Down
KC-PB.3940.1	FKBP9	-0.17705	0.0274725	Down
KC-PB.4595.1	SMC1A	-0.174489	0.043956	Down
KC-PB.3070.1	ATP6V1A	-0.172975	0.037962	Down
KC-PB.2157.1	CNDP2	-0.171804	0.0474525	Down
KC-PB.3484.1	MTREX	-0.171583	0.041958	Down
KC-PB.320.1	LMNA	-0.171393	0.020979	Down
KC-PB.2081.2	VAPA	-0.170365	0.0224775	Down
KC-PB.490.1	ZMYND11	-0.169641	0.041958	Down
KC-PB.3489.1	GPBP1	-0.168505	0.040959	Down
KC-PB.4577.2	UBA1	-0.167931	0.014985	Down
KC-PB.2203.2	ILF3	-0.16655	0.047952	Down
KC-PB.1946.5	TNS4	-0.166216	0.045954	Down
KC-PB.2666.2	CSNK2A1	-0.161895	0.045954	Down
KC-PB.2778.2	CXADR	-0.161434	0.00949051	Down
KC-PB.4342.1	ZFAND5	-0.159083	0.03996	Down
KC-PB.3488.1	PLK2	-0.156413	0.0457043	Down
KC-PB.1105.2	CNOT2	-0.153012	0.0307193	Down
KC-PB.236.1	PRPF38B	-0.150486	0.0499501	Down
KC-PB.1509.1	BAG5	-0.150397	0.0424575	Down
KC-PB.3002.2	RBM5	-0.14998	0.032967	Down
KC-PB.2060.3	SEPTIN9	-0.149599	0.046953	Down
KC-PB.4315.1	NFX1	-0.149248	0.0499501	Down
KC-PB.3586.1	HSPA4	-0.142336	0.0472028	Down
KC-PB.3199.2	CLDN1	-0.141263	0.0194805	Down
KC-PB.376.1	DHX9	-0.141049	0.0404595	Down
KC-PB.311.1	ADAR	-0.140824	0.0454545	Down
KC-PB.2259.2	ACTN4	-0.133106	0.022977	Down
KC-PB.1343.1	TFDP1	-0.13269	0.0484515	Down
KC-PB.987.1	STRAP	-0.132029	0.033966	Down
KC-PB.2225.1	TPM4	-0.123945	0.0164835	Down
KC-PB.771.1	CD59	-0.122693	0.0474525	Down
KC-PB.2881.1	ST13	-0.118621	0.042957	Down
KC-PB.3884.2	EZR	-0.103041	0.036963	Down
KC-PB.3532.1	RPS23	-0.0974953	0.0344655	Down
KC-PB.252.1	CAPZA1	-0.0878326	0.0464535	Down
KC-PB.252.2	CAPZA1	0.0878326	0.0464535	Up
KC-PB.3532.2	RPS23	0.0974953	0.0344655	Up
KC-PB.3884.1	EZR	0.103041	0.036963	Up
KC-PB.2881.2	ST13	0.118621	0.042957	Up
KC-PB.771.2	CD59	0.122693	0.0474525	Up
KC-PB.2225.2	TPM4	0.123945	0.0164835	Up
KC-PB.610.3	PRXL2A	0.125685	0.0494505	Up
KC-PB.987.2	STRAP	0.132029	0.033966	Up
KC-PB.1343.2	TFDP1	0.13269	0.0484515	Up
KC-PB.2259.10	ACTN4	0.133106	0.022977	Up
KC-PB.143.2	CMPK1	0.135099	0.041958	Up
KC-PB.2104.7	DSC3	0.140727	0.0437063	Up
KC-PB.311.2	ADAR	0.140824	0.0454545	Up
KC-PB.376.2	DHX9	0.141049	0.0404595	Up
KC-PB.3199.1	CLDN1	0.141263	0.0194805	Up
KC-PB.4315.2	NFX1	0.149248	0.0499501	Up
KC-PB.3002.1	RBM5	0.14998	0.032967	Up
KC-PB.1509.2	BAG5	0.150397	0.0424575	Up
KC-PB.236.2	PRPF38B	0.150486	0.0499501	Up
KC-PB.2060.2	SEPTIN9	0.158445	0.046953	Up
KC-PB.4342.2	ZFAND5	0.159083	0.03996	Up
KC-PB.2778.1	CXADR	0.161434	0.00949051	Up
KC-PB.2666.1	CSNK2A1	0.161895	0.045954	Up
KC-PB.4577.1	UBA1	0.167931	0.014985	Up
KC-PB.1880.3	EIF4A1	0.168351	0.032967	Up
KC-PB.3489.2	GPBP1	0.168505	0.040959	Up
KC-PB.490.2	ZMYND11	0.169641	0.041958	Up
KC-PB.3484.2	MTREX	0.171583	0.041958	Up
KC-PB.2157.2	CNDP2	0.171804	0.0474525	Up
KC-PB.3070.2	ATP6V1A	0.172975	0.037962	Up
KC-PB.620.2	GLUD1	0.173442	0.02997	Up
KC-PB.4595.2	SMC1A	0.174489	0.043956	Up
KC-PB.320.4	LMNA	0.176495	0.020979	Up
KC-PB.3940.2	FKBP9	0.17705	0.0274725	Up
KC-PB.2488.3	DDX18	0.181251	0.034965	Up
KC-PB.2003.1	SRSF1	0.182271	0.0154845	Up
KC-PB.143.3	CMPK1	0.183437	0.0352148	Up
KC-PB.294.2	ANP32E	0.183965	0.033966	Up
KC-PB.1978.4	NPEPPS	0.183974	0.044955	Up
KC-PB.854.5	CCND1	0.184637	0.00999001	Up
KC-PB.1478.1	GTF2A1	0.186516	0.024975	Up
KC-PB.604.2	AP3M1	0.189979	0.046953	Up
KC-PB.2989.2	MAP4	0.191381	0.0104895	Up
KC-PB.4364.1	BICD2	0.191582	0.032967	Up
KC-PB.2854.3	ASCC2	0.192945	0.03996	Up
KC-PB.2081.3	VAPA	0.193248	0.0224775	Up
KC-PB.3200.2	IL1RAP	0.194928	0.0284715	Up
KC-PB.2203.1	ILF3	0.195103	0.047952	Up
KC-PB.3882.2	SNX9	0.198356	0.0374625	Up
KC-PB.4056.4	CALU	0.199493	0.047952	Up
KC-PB.3733.1	MRPS10	0.199635	0.0144855	Up
KC-PB.4350.2	UBQLN1	0.200311	0.0154845	Up
KC-PB.2569.2	NCKAP1	0.201056	0.00949051	Up
KC-PB.1794.1	VPS4A	0.201688	0.026973	Up
KC-PB.3305.2	SCARB2	0.202984	0.0217283	Up
KC-PB.1069.2	RNF41	0.203452	0.047952	Up
KC-PB.1783.1	SLC12A4	0.204095	0.035964	Up
KC-PB.4176.1	SLC20A2	0.204968	0.0472028	Up
KC-PB.3774.1	CD109	0.205424	0.0134865	Up
KC-PB.3750.1	CD2AP	0.205666	0.0344655	Up
KC-PB.2326.2	RRM2	0.205922	0.0364635	Up
KC-PB.1863.1	UBE2G1	0.206639	0.045954	Up
KC-PB.103.1	ZMYM6	0.208121	0.044955	Up
KC-PB.2380.1	ZFP36L2	0.21062	0.044955	Up
KC-PB.1970.2	UBTF	0.211208	0.0247253	Up
KC-PB.2035.2	PRKAR1A	0.212464	0.01998	Up
KC-PB.2398.1	RTN4	0.213181	0.00674326	Up
KC-PB.2444.1	PTCD3	0.213357	0.0334665	Up
KC-PB.112.1	MTF1	0.213447	0.043956	Up
KC-PB.2872.1	TMEM184B	0.215385	0.045954	Up
KC-PB.1974.2	EFTUD2	0.216044	0.028638	Up
KC-PB.948.2	PUS3	0.216106	0.045954	Up
KC-PB.1955.2	KAT2A	0.22002	0.0334665	Up
KC-PB.2743.7	YWHAB	0.222657	0.0137363	Up
KC-PB.3721.2	FKBP5	0.227989	0.037962	Up
KC-PB.913.1	DDX10	0.228064	0.0434565	Up
KC-PB.3790.3	SYNCRIP	0.228516	0.0314685	Up
KC-PB.3586.3	HSPA4	0.229791	0.032967	Up
KC-PB.217.2	ZNF644	0.231023	0.0397103	Up
KC-PB.335.3	DCAF8	0.231236	0.0344655	Up
KC-PB.4095.2	ABCF2	0.231582	0.035964	Up
KC-PB.2580.1	GTF3C3	0.231854	0.0442058	Up
KC-PB.2928.1	XPC	0.231872	0.0424575	Up
KC-PB.3969.2	ENSG00000290832	0.232775	0.036963	Up
KC-PB.102.1	AK2	0.234268	0.0184815	Up
KC-PB.1974.3	EFTUD2	0.234542	0.028638	Up
KC-PB.1717.4	METTL9	0.236015	0.043956	Up
KC-PB.3681.3	RIOK1	0.236236	0.0474525	Up
KC-PB.4047.1	PTPRZ1	0.237559	0.0104895	Up
KC-PB.1105.3	CNOT2	0.238662	0.0164835	Up
KC-PB.77.1	FAM76A	0.240701	0.021978	Up
KC-PB.2582.2	SF3B1	0.240753	0.017982	Up
KC-PB.902.1	ALKBH8	0.241187	0.0454545	Up
KC-PB.1446.1	ZFP36L1	0.241478	0.003996	Up
KC-PB.3208.1	UBXN7	0.242943	0.0194805	Up
KC-PB.1644.1	FANCI	0.243517	0.0494505	Up
KC-PB.3885.1	TMEM181	0.244244	0.024975	Up
KC-PB.3287.3	REST	0.245019	0.023976	Up
KC-PB.3126.2	COPB2	0.245394	0.0234765	Up
KC-PB.1698.2	SNN	0.245796	0.030969	Up
KC-PB.156.1	DHCR24	0.246128	0.000999001	Up
KC-PB.2080.4	PPP4R1	0.246943	0.023976	Up
KC-PB.104.3	SFPQ	0.247426	0.002997	Up
KC-PB.183.1	GNG12	0.247558	0.00974026	Up
KC-PB.4198.6	ASPH	0.247796	0.0174825	Up
KC-PB.4313.1	ACO1	0.24845	0.0384615	Up
KC-PB.824.4	MTA2	0.249407	0.025974	Up
KC-PB.1726.2	EARS2	0.24981	0.038961	Up
KC-PB.3354.1	ELOVL6	0.250466	0.0254745	Up
KC-PB.893.2	CEP57	0.252038	0.045954	Up
KC-PB.3912.2	TMEM106B	0.253259	0.0144855	Up
KC-PB.2896.1	TTLL12	0.253429	0.00999001	Up
KC-PB.1543.2	EHD4	0.256048	0.044955	Up
KC-PB.367.2	KIAA0040	0.256236	0.032967	Up
KC-PB.2231.2	ELL	0.261428	0.041958	Up
KC-PB.698.3	DENND10	0.262066	0.0144855	Up
KC-PB.966.1	CCND2	0.263406	0.002997	Up
KC-PB.2036.2	SOX9	0.264496	0.0114885	Up
KC-PB.533.5	YME1L1	0.264555	0.03996	Up
KC-PB.432.1	DTL	0.265612	0.0304695	Up
KC-PB.2017.1	METTL2A	0.266234	0.0124875	Up
KC-PB.625.1	IFIT3	0.270487	0.0304695	Up
KC-PB.3362.2	CCNA2	0.270682	0.02997	Up
KC-PB.3691.1	NUP153	0.271343	0.0114885	Up
KC-PB.3901.2	PMS2	0.271352	0.0144855	Up
KC-PB.164.3	NFIA	0.272445	0.00124875	Up
KC-PB.2764.3	STX16	0.27316	0.0354645	Up
KC-PB.3488.2	PLK2	0.275645	0.020979	Up
KC-PB.1131.2	UBE2N	0.278027	0.00999001	Up
KC-PB.2154.1	SERPINB8	0.278105	0.0154845	Up
KC-PB.3626.1	TCERG1	0.278475	0.010989	Up
KC-PB.478.2	GGPS1	0.280937	0.0174825	Up
KC-PB.1330.2	ERCC5	0.282108	0.0174825	Up
KC-PB.4179.1	HOOK3	0.283262	0.0454545	Up
KC-PB.4285.2	AK3	0.287474	0.00549451	Up
KC-PB.730.5	RRM1	0.28813	0.0224775	Up
KC-PB.1936.2	DDX52	0.291174	0.022977	Up
KC-PB.175.2	AK4	0.292813	0.043956	Up
KC-PB.3560.2	REEP5	0.294575	0.00599401	Up
KC-PB.3900.2	RNF216	0.296106	0.018981	Up
KC-PB.1946.4	TNS4	0.296555	0	Up
KC-PB.2942.2	AZI2	0.296584	0.023976	Up
KC-PB.3510.1	UTP15	0.298905	0.036963	Up
KC-PB.4426.3	HSPA5	0.299506	0.0164835	Up
KC-PB.2548.1	SP3	0.301705	0.0024975	Up
KC-PB.1859.4	PAFAH1B1	0.304889	0.023976	Up
KC-PB.3765.2	ZNF451	0.309713	0.044955	Up
KC-PB.1851.2	GEMIN4	0.314374	0.013986	Up
KC-PB.809.3	FAM111B	0.314515	0.0224775	Up
KC-PB.1800.2	AARS1	0.335826	0.017982	Up
KC-PB.399.2	NEK7	0.336406	0.014985	Up
KC-PB.3677.2	EXOC2	0.340064	0.024975	Up
KC-PB.4262.1	FAM83A	0.341408	0.0254745	Up
KC-PB.2388.2	EPAS1	0.343569	0.00899101	Up
KC-PB.2402.2	PNPT1	0.344091	0.0124875	Up
KC-PB.3296.1	EPGN	0.345188	0.037962	Up
KC-PB.4195.2	RAB2A	0.34907	0.0034965	Up
KC-PB.751.2	FAR1	0.349076	0.0344655	Up
KC-PB.3245.3	NCAPG	0.351352	0.033966	Up
KC-PB.701.2	SEC23IP	0.352134	0.0499501	Up
KC-PB.2553.1	HNRNPA3	0.359106	0	Up
KC-PB.2079.1	RAB31	0.361119	0.0234765	Up
KC-PB.3632.9	CSNK1A1	0.363596	0.00599401	Up
KC-PB.3780.3	TTK	0.367318	0.0457043	Up
KC-PB.348.3	MPZL1	0.369477	0.013986	Up
KC-PB.3660.1	ERGIC1	0.372167	0.00549451	Up
KC-PB.1666.4	FAM234A	0.373932	0.0134865	Up
KC-PB.1931.2	AP2B1	0.378427	0.0244755	Up
KC-PB.2422.2	GFPT1	0.392048	0.010989	Up
KC-PB.4378.4	NCBP1	0.410472	0.027972	Up
KC-PB.2695.3	SEC23B	0.431156	0.00624376	Up
KC-PB.3324.1	ENSG00000251095	0.445726	0.0404595	Up
KC-PB.598.3	P4HA1	0.466496	0.013986	Up
KC-PB.117.2	AKIRIN1	0.470585	0.0044955	Up
KC-PB.3162.2	GOLIM4	0.481716	0.00599401	Up
KC-PB.4549.3	MID1	0.505417	0.024975	Up
KC-PB.1910.4	SPECC1	0.507013	0.0127373	Up
KC-PB.4636.2	IL13RA1	0.513613	0	Up
KC-PB.1289.2	RCBTB1	0.525057	0.010989	Up
KC-PB.4107.1	AGPAT5	0.537385	0.00974026	Up
KC-PB.4005.4	ARPC1B	0.559163	0	Up
KC-PB.3308.1	CCNI	0.611211	0	Up
KC-PB.3597.2	KIF20A	0.6238	0.00674326	Up
KC-PB.2904.1	GTSE1	0.645822	0.00749251	Up
KC-PB.2713.1	ZNF341	0.747151	0.00799201	Up
KC-PB.97.8	PTP4A2	0.751685	0.000749251	Up

## Sheet: Table S5.4
			Table S5.4 Significant alternative splicing events detected in keratinocytes.
seqname	gene_id	GeneName	AlternativeS	event_id	ΔPSI...WK...SK	P.val	Sig	alternative_transcripts	total_transcripts
chr16	KC-PB.1765	RSPRY1	A5	KC-PB.1765;A5:chr16:57187050-57204504:57186429-57204504:+	-0.660785	0.024975	Down	KC-PB.1765.1	KC-PB.1765.1,KC-PB.1765.3
chr3	KC-PB.3049	COL8A1	SE	KC-PB.3049;SE:chr3:99638664-99691399:99691568-99744897:+	-0.624136	0.0194805	Down	KC-PB.3049.2	KC-PB.3049.2,KC-PB.3049.5
chr7	KC-PB.4005	ARPC1B	SE	KC-PB.4005;SE:chr7:99374781-99377338:99377455-99385702:+	-0.604442	0	Down	KC-PB.4005.1	KC-PB.4005.6,KC-PB.4005.3,KC-PB.4005.4,KC-PB.4005.1
chr7	KC-PB.4005	ARPC1B	SE	KC-PB.4005;SE:chr7:99374781-99377338:99377455-99385702:+	-0.604442	0	Down	KC-PB.4005.3	KC-PB.4005.6,KC-PB.4005.3,KC-PB.4005.4,KC-PB.4005.1
chr7	KC-PB.4005	ARPC1B	SE	KC-PB.4005;SE:chr7:99374781-99377338:99377455-99385702:+	-0.604442	0	Down	KC-PB.4005.6	KC-PB.4005.6,KC-PB.4005.3,KC-PB.4005.4,KC-PB.4005.1
chr18	KC-PB.2093	RBBP8	AF	KC-PB.2093;AF:chr18:22933332:22933564-22936754:22933869:22934159-22936754:+	-0.604244	0.0344655	Down	KC-PB.2093.3	KC-PB.2093.3,KC-PB.2093.7
chr17	KC-PB.1931	AP2B1	A5	KC-PB.1931;A5:chr17:35587663-35594008:35587597-35594008:+	-0.54012	0.025974	Down	KC-PB.1931.6	KC-PB.1931.5,KC-PB.1931.6,KC-PB.1931.7
chr13	KC-PB.1289	RCBTB1	RI	KC-PB.1289;RI:chr13:49531948:49533070-49533086:49534262:-	-0.525057	0.00949051	Down	KC-PB.1289.1	KC-PB.1289.2,KC-PB.1289.1
chr5	KC-PB.3669	CANX	AF	KC-PB.3669;AF:chr5:179698935:179699049-179705679:179699053:179699102-179705679:+	-0.480097	0.00499501	Down	KC-PB.3669.1	KC-PB.3669.1,KC-PB.3669.14
chr1	KC-PB.117	AKIRIN1	RI	KC-PB.117;RI:chr1:39004045:39005298-39005308:39005323:+	-0.470585	0.0134865	Down	KC-PB.117.3	KC-PB.117.3,KC-PB.117.2
chr8	KC-PB.4262	FAM83A	AL	KC-PB.4262;AL:chr8:123194148-123199853:123200969:123194148-123207157:123209467:+	-0.396112	0	Down	KC-PB.4262.3	KC-PB.4262.3,KC-PB.4262.1
chr3	KC-PB.3170	ECT2	SE	KC-PB.3170;SE:chr3:172750857-172752150:172752472-172754509:+	-0.389846	0.016983	Down	KC-PB.3170.1	KC-PB.3170.1,KC-PB.3170.4,KC-PB.3170.3,KC-PB.3170.6,KC-PB.3170.2,KC-PB.3170.5
chr4	KC-PB.3296	EPGN	A5	KC-PB.3296;A5:chr4:74309182-74312185:74309155-74312185:+	-0.38259	0.030969	Down	KC-PB.3296.2	KC-PB.3296.2,KC-PB.3296.1,KC-PB.3296.3,KC-PB.3296.4
chr4	KC-PB.3296	EPGN	A5	KC-PB.3296;A5:chr4:74309182-74312185:74309155-74312185:+	-0.38259	0.030969	Down	KC-PB.3296.3	KC-PB.3296.2,KC-PB.3296.1,KC-PB.3296.3,KC-PB.3296.4
chr1	KC-PB.317	KHDC4	RI	KC-PB.317;RI:chr1:155921375:155921527-155921861:155921918:-	-0.29855	0.045954	Down	KC-PB.317.2	KC-PB.317.2,KC-PB.317.4
chr5	KC-PB.3560	REEP5	A5	KC-PB.3560;A5:chr5:112877981-112877990:112877981-112877992:-	-0.294575	0.00849151	Down	KC-PB.3560.1	KC-PB.3560.1,KC-PB.3560.2
chr2	KC-PB.2612	FN1	RI	KC-PB.2612;RI:chr2:215371909:215372015-215372109:215372375:-	-0.286585	0.0274725	Down	KC-PB.2612.2	KC-PB.2612.11,KC-PB.2612.2,KC-PB.2612.5,KC-PB.2612.9,KC-PB.2612.8,KC-PB.2612.6,KC-PB.2612.7
chr2	KC-PB.2612	FN1	RI	KC-PB.2612;RI:chr2:215371909:215372015-215372109:215372375:-	-0.286585	0.0274725	Down	KC-PB.2612.8	KC-PB.2612.11,KC-PB.2612.2,KC-PB.2612.5,KC-PB.2612.9,KC-PB.2612.8,KC-PB.2612.6,KC-PB.2612.7
chr1	KC-PB.188	SRSF11	A3	KC-PB.188;A3:chr1:70250503-70250608:70250503-70250611:+	-0.283771	0.017982	Down	KC-PB.188.4	KC-PB.188.2,KC-PB.188.4,KC-PB.188.1
chr18	KC-PB.2154	SERPINB8	A5	KC-PB.2154;A5:chr18:63970187-63978299:63970170-63978299:+	-0.278105	0.026973	Down	KC-PB.2154.2	KC-PB.2154.1,KC-PB.2154.2
chr10	KC-PB.698	DENND10	A3	KC-PB.698;A3:chr10:119104197-119107948:119104197-119107968:+	-0.262066	0.022977	Down	KC-PB.698.2	KC-PB.698.2,KC-PB.698.3
chr4	KC-PB.3287	REST	AF	KC-PB.3287;AF:chr4:56907908:56908213-56910630:56908951:56909039-56910630:+	-0.247592	0.046953	Down	KC-PB.3287.2	KC-PB.3287.2,KC-PB.3287.3
chr3	KC-PB.3126	COPB2	SE	KC-PB.3126;SE:chr3:139383435-139385004:139385200-139389548:-	-0.245394	0.0134865	Down	KC-PB.3126.1	KC-PB.3126.2,KC-PB.3126.1
chr5	KC-PB.3550	PAM	A3	KC-PB.3550;A3:chr5:103019843-103028182:103019843-103028185:+	-0.244648	0.046953	Down	KC-PB.3550.5	KC-PB.3550.3,KC-PB.3550.5
chr6	KC-PB.3681	RIOK1	A3	KC-PB.3681;A3:chr6:7393303-7395021:7393303-7395053:+	-0.236236	0.0499501	Down	KC-PB.3681.2	KC-PB.3681.3,KC-PB.3681.2
chr9	KC-PB.4327	EBLN3P	A5	KC-PB.4327;A5:chr9:37080536-37086668:37080038-37086668:+	-0.225273	0.0404595	Down	KC-PB.4327.2	KC-PB.4327.2,KC-PB.4327.3,KC-PB.4327.1
chr9	KC-PB.4327	EBLN3P	A5	KC-PB.4327;A5:chr9:37080536-37086668:37080038-37086668:+	-0.225273	0.0404595	Down	KC-PB.4327.1	KC-PB.4327.2,KC-PB.4327.3,KC-PB.4327.1
chr1	KC-PB.217	ZNF644	SE	KC-PB.217;SE:chr1:90982370-91020637:91021201-91021990:-	-0.218287	0.02997	Down	KC-PB.217.4	KC-PB.217.3,KC-PB.217.4,KC-PB.217.2
chr16	KC-PB.1771	CNOT1	A5	KC-PB.1771;A5:chr16:58534395-58536968:58534395-58536989:-	-0.216043	0.0314685	Down	KC-PB.1771.2	KC-PB.1771.2,KC-PB.1771.3
chr2	KC-PB.2444	PTCD3	RI	KC-PB.2444;RI:chr2:86123701:86123762-86124995:86125082:+	-0.213357	0.0294705	Down	KC-PB.2444.2	KC-PB.2444.1,KC-PB.2444.2
chr17	KC-PB.1970	UBTF	AF	KC-PB.1970;AF:chr17:44218296-44219445:44219502:44218296-44220740:44220940:-	-0.211208	0.023976	Down	KC-PB.1970.1	KC-PB.1970.2,KC-PB.1970.1,KC-PB.1970.3
chr17	KC-PB.1970	UBTF	AF	KC-PB.1970;AF:chr17:44218296-44219445:44219502:44218296-44220740:44220940:-	-0.211208	0.023976	Down	KC-PB.1970.3	KC-PB.1970.2,KC-PB.1970.1,KC-PB.1970.3
chr16	KC-PB.1794	VPS4A	RI	KC-PB.1794;RI:chr16:69321051:69321270-69322560:69322700:+	-0.201688	0.0294705	Down	KC-PB.1794.2	KC-PB.1794.1,KC-PB.1794.2
chr3	KC-PB.3200	IL1RAP	SE	KC-PB.3200;SE:chr3:190514219-190556130:190556216-190564289:+	-0.194928	0.028971	Down	KC-PB.3200.1	KC-PB.3200.2,KC-PB.3200.1
chr10	KC-PB.604	AP3M1	SE	KC-PB.604;SE:chr10:74138382-74138806:74138931-74150755:-	-0.189979	0.0404595	Down	KC-PB.604.1	KC-PB.604.1,KC-PB.604.2
chr1	KC-PB.37	EXOSC10	RI	KC-PB.37;RI:chr1:11080499:11080549-11080764:11080912:-	-0.18376	0.0414585	Down	KC-PB.37.2	KC-PB.37.2,KC-PB.37.1,KC-PB.37.4,KC-PB.37.3
chr14	KC-PB.1353	HNRNPC	SE	KC-PB.1353;SE:chr14:21234229-21262601:21263829-21269298:-	-0.169208	0.0224775	Down	KC-PB.1353.3	KC-PB.1353.6,KC-PB.1353.3
chr5	KC-PB.3489	GPBP1	SE	KC-PB.3489;SE:chr5:57236032-57237113:57237172-57246300:+	-0.168505	0.037962	Down	KC-PB.3489.1	KC-PB.3489.2,KC-PB.3489.1
chr8	KC-PB.4262	FAM83A	AL	KC-PB.4262;AL:chr8:123194148-123199853:123200969:123194148-123207157:123208981:+	-0.16595	0.046875	Down	KC-PB.4262.3	KC-PB.4262.3,KC-PB.4262.5,KC-PB.4262.2
chr9	KC-PB.4342	ZFAND5	SE	KC-PB.4342;SE:chr9:72360787-72363470:72363606-72364696:-	-0.159083	0.031968	Down	KC-PB.4342.1	KC-PB.4342.2,KC-PB.4342.1
chr12	KC-PB.1105	CNOT2	SE	KC-PB.1105;SE:chr12:70278274-70285400:70285586-70310895:+	-0.153012	0.027972	Down	KC-PB.1105.2	KC-PB.1105.2,KC-PB.1105.3,KC-PB.1105.1
chr2	KC-PB.2390	MCFD2	AF	KC-PB.2390;AF:chr2:46909177-46915723:46915795:46909177-46941572:46941721:-	-0.150268	0.0499501	Down	KC-PB.2390.1	KC-PB.2390.1,KC-PB.2390.2
chr14	KC-PB.1416	KTN1	SE	KC-PB.1416;SE:chr14:55661612-55663955:55664041-55667241:+	0.0953423	0.0444555	Up	KC-PB.1416.3	KC-PB.1416.3,KC-PB.1416.2
chr19	KC-PB.2203	ILF3	A3	KC-PB.2203;A3:chr19:10682704-10683125:10682704-10683137:+	0.152892	0.044955	Up	KC-PB.2203.1	KC-PB.2203.4,KC-PB.2203.3,KC-PB.2203.2,KC-PB.2203.1
chr19	KC-PB.2203	ILF3	A3	KC-PB.2203;A3:chr19:10682704-10683125:10682704-10683137:+	0.152892	0.044955	Up	KC-PB.2203.4	KC-PB.2203.4,KC-PB.2203.3,KC-PB.2203.2,KC-PB.2203.1
chr1	KC-PB.32	MFN2	A5	KC-PB.32;A5:chr1:12001554-12001769:12001553-12001769:+	0.15771	0.03996	Up	KC-PB.32.1	KC-PB.32.3,KC-PB.32.2,KC-PB.32.1,KC-PB.32.4
chr1	KC-PB.32	MFN2	A5	KC-PB.32;A5:chr1:12001554-12001769:12001553-12001769:+	0.15771	0.03996	Up	KC-PB.32.2	KC-PB.32.3,KC-PB.32.2,KC-PB.32.1,KC-PB.32.4
chr1	KC-PB.32	MFN2	A5	KC-PB.32;A5:chr1:12001554-12001769:12001553-12001769:+	0.15771	0.03996	Up	KC-PB.32.3	KC-PB.32.3,KC-PB.32.2,KC-PB.32.1,KC-PB.32.4
chrX	KC-PB.4577	UBA1	AF	KC-PB.4577;AF:chrX:47190845:47190950-47198803:47193829:47194024-47198803:+	0.167931	0.0414585	Up	KC-PB.4577.1	KC-PB.4577.2,KC-PB.4577.1
chr17	KC-PB.1946	TNS4	A5	KC-PB.1946;A5:chr17:40488969-40495987:40488969-40495988:-	0.169517	0.0324675	Up	KC-PB.1946.4	KC-PB.1946.9,KC-PB.1946.7,KC-PB.1946.4,KC-PB.1946.8,KC-PB.1946.6,KC-PB.1946.3
chr17	KC-PB.1946	TNS4	A5	KC-PB.1946;A5:chr17:40488969-40495987:40488969-40495988:-	0.169517	0.0324675	Up	KC-PB.1946.6	KC-PB.1946.9,KC-PB.1946.7,KC-PB.1946.4,KC-PB.1946.8,KC-PB.1946.6,KC-PB.1946.3
chr17	KC-PB.1946	TNS4	A5	KC-PB.1946;A5:chr17:40488969-40495987:40488969-40495988:-	0.169517	0.0324675	Up	KC-PB.1946.7	KC-PB.1946.9,KC-PB.1946.7,KC-PB.1946.4,KC-PB.1946.8,KC-PB.1946.6,KC-PB.1946.3
chr17	KC-PB.1946	TNS4	A5	KC-PB.1946;A5:chr17:40488969-40495987:40488969-40495988:-	0.169517	0.0324675	Up	KC-PB.1946.8	KC-PB.1946.9,KC-PB.1946.7,KC-PB.1946.4,KC-PB.1946.8,KC-PB.1946.6,KC-PB.1946.3
chr17	KC-PB.1946	TNS4	A5	KC-PB.1946;A5:chr17:40488969-40495987:40488969-40495988:-	0.169517	0.0324675	Up	KC-PB.1946.9	KC-PB.1946.9,KC-PB.1946.7,KC-PB.1946.4,KC-PB.1946.8,KC-PB.1946.6,KC-PB.1946.3
chr16	KC-PB.1771	CNOT1	A3	KC-PB.1771;A3:chr16:58574760-58575007:58574759-58575007:-	0.172527	0.0404595	Up	KC-PB.1771.3	KC-PB.1771.4,KC-PB.1771.2,KC-PB.1771.3
chr16	KC-PB.1771	CNOT1	A3	KC-PB.1771;A3:chr16:58574760-58575007:58574759-58575007:-	0.172527	0.0404595	Up	KC-PB.1771.4	KC-PB.1771.4,KC-PB.1771.2,KC-PB.1771.3
chr2	KC-PB.2531	RBMS1	SE	KC-PB.2531;SE:chr2:160281364-160282257:160282304-160284775:-	0.189356	0.02997	Up	KC-PB.2531.1	KC-PB.2531.3,KC-PB.2531.2,KC-PB.2531.6,KC-PB.2531.8,KC-PB.2531.1,KC-PB.2531.7
chr2	KC-PB.2531	RBMS1	SE	KC-PB.2531;SE:chr2:160281364-160282257:160282304-160284775:-	0.189356	0.02997	Up	KC-PB.2531.2	KC-PB.2531.3,KC-PB.2531.2,KC-PB.2531.6,KC-PB.2531.8,KC-PB.2531.1,KC-PB.2531.7
chr5	KC-PB.3485	IL6ST	A5	KC-PB.3485;A5:chr5:55968396-55969550:55968396-55969760:-	0.190075	0.036963	Up	KC-PB.3485.1	KC-PB.3485.3,KC-PB.3485.1
chr18	KC-PB.2081	VAPA	SE	KC-PB.2081;SE:chr18:9914335-9927096:9927254-9931810:+	0.193248	0.00999001	Up	KC-PB.2081.3	KC-PB.2081.2,KC-PB.2081.1,KC-PB.2081.3
chr1	KC-PB.50	HP1BP3	SE	KC-PB.50;SE:chr1:20779911-20780345:20780540-20787195:-	0.195281	0.00699301	Up	KC-PB.50.1	KC-PB.50.7,KC-PB.50.6,KC-PB.50.5,KC-PB.50.3,KC-PB.50.1,KC-PB.50.4
chr1	KC-PB.50	HP1BP3	SE	KC-PB.50;SE:chr1:20779911-20780345:20780540-20787195:-	0.195281	0.00699301	Up	KC-PB.50.3	KC-PB.50.7,KC-PB.50.6,KC-PB.50.5,KC-PB.50.3,KC-PB.50.1,KC-PB.50.4
chr1	KC-PB.50	HP1BP3	SE	KC-PB.50;SE:chr1:20779911-20780345:20780540-20787195:-	0.195281	0.00699301	Up	KC-PB.50.5	KC-PB.50.7,KC-PB.50.6,KC-PB.50.5,KC-PB.50.3,KC-PB.50.1,KC-PB.50.4
chr1	KC-PB.50	HP1BP3	SE	KC-PB.50;SE:chr1:20779911-20780345:20780540-20787195:-	0.195281	0.00699301	Up	KC-PB.50.7	KC-PB.50.7,KC-PB.50.6,KC-PB.50.5,KC-PB.50.3,KC-PB.50.1,KC-PB.50.4
chr2	KC-PB.2531	RBMS1	A5	KC-PB.2531;A5:chr2:160285044-160286969:160285044-160286978:-	0.231498	0.0204795	Up	KC-PB.2531.1	KC-PB.2531.3,KC-PB.2531.2,KC-PB.2531.6,KC-PB.2531.8,KC-PB.2531.1,KC-PB.2531.7
chr2	KC-PB.2531	RBMS1	A5	KC-PB.2531;A5:chr2:160285044-160286969:160285044-160286978:-	0.231498	0.0204795	Up	KC-PB.2531.2	KC-PB.2531.3,KC-PB.2531.2,KC-PB.2531.6,KC-PB.2531.8,KC-PB.2531.1,KC-PB.2531.7
chr2	KC-PB.2531	RBMS1	A5	KC-PB.2531;A5:chr2:160285044-160286969:160285044-160286978:-	0.231498	0.0204795	Up	KC-PB.2531.3	KC-PB.2531.3,KC-PB.2531.2,KC-PB.2531.6,KC-PB.2531.8,KC-PB.2531.1,KC-PB.2531.7
chr2	KC-PB.2531	RBMS1	A5	KC-PB.2531;A5:chr2:160285044-160286969:160285044-160286978:-	0.231498	0.0204795	Up	KC-PB.2531.7	KC-PB.2531.3,KC-PB.2531.2,KC-PB.2531.6,KC-PB.2531.8,KC-PB.2531.1,KC-PB.2531.7
chr2	KC-PB.2531	RBMS1	A5	KC-PB.2531;A5:chr2:160285044-160286969:160285044-160286978:-	0.231498	0.0204795	Up	KC-PB.2531.8	KC-PB.2531.3,KC-PB.2531.2,KC-PB.2531.6,KC-PB.2531.8,KC-PB.2531.1,KC-PB.2531.7
chr11	KC-PB.902	ALKBH8	A3	KC-PB.902;A3:chr11:107553978-107556766:107553973-107556766:-	0.241187	0.0474525	Up	KC-PB.902.1	KC-PB.902.1,KC-PB.902.2
chr16	KC-PB.1666	FAM234A	A3	KC-PB.1666;A3:chr16:259599-259969:259599-259996:+	0.24748	0.0304695	Up	KC-PB.1666.2	KC-PB.1666.3,KC-PB.1666.4,KC-PB.1666.2
chr16	KC-PB.1666	FAM234A	A3	KC-PB.1666;A3:chr16:259599-259969:259599-259996:+	0.24748	0.0304695	Up	KC-PB.1666.4	KC-PB.1666.3,KC-PB.1666.4,KC-PB.1666.2
chr14	KC-PB.1444	RDH11	RI	KC-PB.1444;RI:chr14:67677575:67678254-67678262:67678423:-	0.263702	0.032967	Up	KC-PB.1444.6	KC-PB.1444.6,KC-PB.1444.7
chr20	KC-PB.2749	ELMO2	SE	KC-PB.2749;SE:chr20:46394532-46398697:46398771-46406548:-	0.300904	0.0394605	Up	KC-PB.2749.1	KC-PB.2749.1,KC-PB.2749.3
chr8	KC-PB.4239	YWHAZ	AF	KC-PB.4239;AF:chr8:100948900-100951929:100952019:100948900-100953269:100953365:-	0.307937	0.0174825	Up	KC-PB.4239.1	KC-PB.4239.8,KC-PB.4239.9,KC-PB.4239.11,KC-PB.4239.1
chr8	KC-PB.4239	YWHAZ	AF	KC-PB.4239;AF:chr8:100948900-100951929:100952019:100948900-100953269:100953365:-	0.307937	0.0174825	Up	KC-PB.4239.8	KC-PB.4239.8,KC-PB.4239.9,KC-PB.4239.11,KC-PB.4239.1
chr8	KC-PB.4239	YWHAZ	AF	KC-PB.4239;AF:chr8:100948900-100951929:100952019:100948900-100953269:100953365:-	0.307937	0.0174825	Up	KC-PB.4239.11	KC-PB.4239.8,KC-PB.4239.9,KC-PB.4239.11,KC-PB.4239.1
chr11	KC-PB.809	FAM111B	SE	KC-PB.809;SE:chr11:59108712-59109540:59109706-59124179:+	0.310829	0.017982	Up	KC-PB.809.1	KC-PB.809.3,KC-PB.809.1,KC-PB.809.2
chr11	KC-PB.809	FAM111B	SE	KC-PB.809;SE:chr11:59108712-59109540:59109706-59124179:+	0.310829	0.017982	Up	KC-PB.809.3	KC-PB.809.3,KC-PB.809.1,KC-PB.809.2
chr17	KC-PB.1946	TNS4	A5	KC-PB.1946;A5:chr17:40476369-40476386:40476369-40476390:-	0.328889	0.012987	Up	KC-PB.1946.4	KC-PB.1946.4,KC-PB.1946.3
chr8	KC-PB.4239	YWHAZ	AF	KC-PB.4239;AF:chr8:100948900-100951929:100952044:100948900-100953269:100953365:-	0.329482	0.016317	Up	KC-PB.4239.4	KC-PB.4239.4,KC-PB.4239.9
chr7	KC-PB.3896	MRM2	A5	KC-PB.3896;A5:chr7:2238937-2239418:2238937-2239530:-	0.33315	0.0414585	Up	KC-PB.3896.1	KC-PB.3896.2,KC-PB.3896.1
chr8	KC-PB.4239	YWHAZ	AF	KC-PB.4239;AF:chr8:100948900-100951929:100952019:100948900-100952850:100952995:-	0.346245	0.016317	Up	KC-PB.4239.1	KC-PB.4239.8,KC-PB.4239.5,KC-PB.4239.11,KC-PB.4239.1
chr8	KC-PB.4239	YWHAZ	AF	KC-PB.4239;AF:chr8:100948900-100951929:100952019:100948900-100952850:100952995:-	0.346245	0.016317	Up	KC-PB.4239.8	KC-PB.4239.8,KC-PB.4239.5,KC-PB.4239.11,KC-PB.4239.1
chr8	KC-PB.4239	YWHAZ	AF	KC-PB.4239;AF:chr8:100948900-100951929:100952019:100948900-100952850:100952995:-	0.346245	0.016317	Up	KC-PB.4239.11	KC-PB.4239.8,KC-PB.4239.5,KC-PB.4239.11,KC-PB.4239.1
chr8	KC-PB.4239	YWHAZ	AF	KC-PB.4239;AF:chr8:100948900-100951929:100952044:100948900-100952850:100952995:-	0.423975	0.013986	Up	KC-PB.4239.4	KC-PB.4239.4,KC-PB.4239.5
chr6	KC-PB.3790	SYNCRIP	AF	KC-PB.3790;AF:chr6:85641451-85642797:85642924:85641451-85643750:85643867:-	0.432976	0.013986	Up	KC-PB.3790.7	KC-PB.3790.7,KC-PB.3790.2
chr6	KC-PB.3790	SYNCRIP	AF	KC-PB.3790;AF:chr6:85641451-85642797:85642935:85641451-85643750:85643867:-	0.439573	0.003996	Up	KC-PB.3790.3	KC-PB.3790.3,KC-PB.3790.2
chr2	KC-PB.2662	SEPTIN2	MX	KC-PB.2662;MX:chr2:241315982-241317499:241317599-241324216:241315982-241320203:241320287-241324216:+	0.497279	0	Up	KC-PB.2662.7	KC-PB.2662.7,KC-PB.2662.8
chr17	KC-PB.1910	SPECC1	SE	KC-PB.1910;SE:chr17:20156236-20204333:20205912-20227413:+	0.498173	0.036963	Up	KC-PB.1910.1	KC-PB.1910.4,KC-PB.1910.1,KC-PB.1910.2
chr17	KC-PB.1910	SPECC1	SE	KC-PB.1910;SE:chr17:20156236-20204333:20205912-20227413:+	0.498173	0.036963	Up	KC-PB.1910.4	KC-PB.1910.4,KC-PB.1910.1,KC-PB.1910.2
chr6	KC-PB.3791	NT5E	SE	KC-PB.3791;SE:chr6:85489599-85490508:85490657-85491977:+	0.623918	0.0194805	Up	KC-PB.3791.4	KC-PB.3791.3,KC-PB.3791.4
chr18	KC-PB.2093	RBBP8	AF	KC-PB.2093;AF:chr18:22933354:22933564-22936754:22933858:22934159-22936754:+	0.625236	0.0344655	Up	KC-PB.2093.4	KC-PB.2093.6,KC-PB.2093.4
