# Supplementary material
Source: Research Square preprint supplement (doi:10.21203/rs.3.rs-9917999/v1)
Supplement: Supplementary file 9 [file aea3d9bede3cea3cd1c1e6f0.xlsx]

## Sheet: Table S9.1
Table S9.1 Promoters detected in FB
promoterId	geneId	Gene.name	seqnames	start	strand	internalPromoter	promoterPosition	txId	SF.mean	SF.gene.mean	WF.mean	WF.gene.mean	SF.class	WF.class	SF1.apa.mean	SF2.apa.mean	SF3.apa.mean	SF4.apa.mean	SF5.apa.mean	WF1.apa.mean	WF2.apa.mean	WF3.apa.mean	WF4.apa.mean	WF5.apa.mean	SF1.gene.mean	SF2.gene.mean	SF3.gene.mean	SF4.gene.mean	SF5.gene.mean	WF1.gene.mean	WF2.gene.mean	WF3.gene.mean	WF4.gene.mean	WF5.gene.mean	apa.logFC	apa.AveExpr	apa.t	apa.P.Value	apa.adj.P.Val	apa.B	Sig_p0.05_FC1	promoterCount	PromoterState
1	ENSG00000000457	SCYL3	chr1	169893907	-	FALSE	1	FB-PB.397.1	3.34225	3.34225	3.45025	3.45025	Major	Major	3.18019	3.26684	3.66274	2.34943	4.25204	4.02226	3.09572	2.94676	3.54569	3.6408	3.18019	3.26684	3.66274	2.34943	4.25204	4.02226	3.09572	2.94676	3.54569	3.6408	0.107998	3.39625	0.310755	0.762672	0.867949	-6.90357	NonSig	1	Single-promoter
2	ENSG00000001036	FUCA2	chr6	143511717	-	FALSE	1	FB-PB.4382.1	6.58258	6.58258	6.60816	6.60816	Major	Major	6.86528	5.87042	7.13931	6.74822	6.28968	6.47938	6.59958	6.83702	6.28317	6.84162	6.86528	5.87042	7.13931	6.74822	6.28968	6.47938	6.59958	6.83702	6.28317	6.84162	0.0255737	6.59537	0.104819	0.918691	0.970197	-6.95016	NonSig	1	Single-promoter
3	ENSG00000001461	NIPAL3	chr1	24415795	+	FALSE	1	FB-PB.64.1,FB-PB.64.2,FB-PB.64.3	3.1031	3.1031	3.00929	3.00929	Major	Major	2.6727	2.75493	3.18199	3.73212	3.17378	3.28001	2.67627	3.20184	2.66422	3.2241	2.6727	2.75493	3.18199	3.73212	3.17378	3.28001	2.67627	3.20184	2.66422	3.2241	-0.0938182	3.0562	-0.404964	0.694438	0.823988	-6.86716	NonSig	1	Single-promoter
4	ENSG00000001630	CYP51A1	chr7	92128915	-	TRUE	3	FB-PB.4569.3	5.76612	12.2213	6.04159	13.0549	NA	NA	5.7513	6.27928	5.01815	5.64831	6.13356	5.58002	6.29728	6.30898	5.8743	6.14739	10.9892	14.8841	10.878	12.5423	11.813	13.1292	12.316	13.5306	12.8762	13.4223	0.275473	5.90386	1.08362	0.305165	0.497146	-6.35019	NonSig	3	Multiple-promoter
5	ENSG00000001630	CYP51A1	chr7	92134474	-	FALSE	2	FB-PB.4569.1,FB-PB.4569.4	4.97551	12.2213	4.72526	13.0549	Minor	Minor	5.23792	6.33172	4.93595	4.28044	4.09154	4.11587	4.96325	4.98041	4.3377	5.22907	10.9892	14.8841	10.878	12.5423	11.813	13.1292	12.316	13.5306	12.8762	13.4223	-0.250253	4.85039	-0.592654	0.567198	0.730533	-6.76735	NonSig	3	Multiple-promoter
6	ENSG00000001630	CYP51A1	chr7	92134775	-	FALSE	1	FB-PB.4569.2	1.47969	12.2213	2.28801	13.0549	Minor	Minor	0	2.27306	0.923938	2.6136	1.58785	3.43334	1.05547	2.24119	2.66422	2.04584	10.9892	14.8841	10.878	12.5423	11.813	13.1292	12.316	13.5306	12.8762	13.4223	0.808322	1.88385	1.42811	0.185176	0.359525	-5.94516	NonSig	3	Multiple-promoter
7	ENSG00000001631	KRIT1	chr7	92245928	-	FALSE	1	FB-PB.4571.1,FB-PB.4571.2,FB-PB.4571.3	1.75656	1.75656	2.80118	2.80118	Major	Major	1.48133	2.94647	0	3.35283	1.00217	4.36497	2.08243	4.18175	0	3.37677	1.48133	2.94647	0	3.35283	1.00217	4.36497	2.08243	4.18175	0	3.37677	1.04462	2.27887	1.11521	0.292072	0.48467	-6.31648	NonSig	1	Single-promoter
8	ENSG00000002834	LASP1	chr17	38870058	+	FALSE	1	FB-PB.2167.2	7.88461	7.88461	8.13222	8.13222	Major	Major	7.74319	7.97232	7.79268	8.08402	7.83086	8.1058	8.02732	8.52579	7.87555	8.12667	7.74319	7.97232	7.79268	8.08402	7.83086	8.1058	8.02732	8.52579	7.87555	8.12667	0.247611	8.00842	1.72524	0.11667	0.266982	-5.53973	NonSig	1	Single-promoter
9	ENSG00000003056	M6PR	chr12	8949667	-	FALSE	1	FB-PB.1105.1,FB-PB.1105.2	4.90008	4.90008	5.08247	5.08247	Major	Major	5.20325	5.11032	4.43547	4.61784	5.13349	5.40564	5.3916	5.01409	5.22127	4.37975	5.20325	5.11032	4.43547	4.61784	5.13349	5.40564	5.3916	5.01409	5.22127	4.37975	0.182395	4.99127	0.757127	0.467266	0.647594	-6.65147	NonSig	1	Single-promoter
10	ENSG00000003096	KLHL13	chrX	118116800	-	FALSE	1	FB-PB.5359.1	1.60625	1.60625	0.857406	0.857406	Major	Major	0	2.94647	1.88435	3.20045	0	0	0	2.24119	0	2.04584	0	2.94647	1.88435	3.20045	0	0	0	2.24119	0	2.04584	-0.748847	1.23183	-0.935195	0.372762	0.56089	-6.49821	NonSig	1	Single-promoter
11	ENSG00000003393	ALS2	chr2	201780965	-	FALSE	1	FB-PB.2943.1,FB-PB.2943.2	3.10364	3.10364	3.46368	3.46368	Major	Major	2.6727	2.75493	3.66274	3.83923	2.58858	2.68841	3.80124	3.41852	3.8954	3.51481	2.6727	2.75493	3.66274	3.83923	2.58858	2.68841	3.80124	3.41852	3.8954	3.51481	0.360041	3.28366	1.10919	0.294532	0.486988	-6.32296	NonSig	1	Single-promoter
12	ENSG00000003402	CFLAR	chr2	201116168	+	FALSE	1	FB-PB.2929.1,FB-PB.2929.2	4.40443	4.40443	4.71519	4.71519	Major	Major	4.1719	4.26371	4.60463	4.11976	4.86217	4.87378	4.4962	4.54641	4.84609	4.81348	4.1719	4.26371	4.60463	4.11976	4.86217	4.87378	4.4962	4.54641	4.84609	4.81348	0.31076	4.55981	1.79738	0.103948	0.250318	-5.43504	NonSig	1	Single-promoter
13	ENSG00000003436	TFPI	chr2	187554463	-	FALSE	1	FB-PB.2901.2,FB-PB.2901.3,FB-PB.2901.1,FB-PB.2901.4,FB-PB.2901.5,FB-PB.2901.6,FB-PB.2901.7	7.60759	7.60759	7.57351	7.57351	Major	Major	7.56351	6.82183	7.53094	8.06207	8.0596	7.16677	7.62402	8.02904	7.50345	7.54429	7.56351	6.82183	7.53094	8.06207	8.0596	7.16677	7.62402	8.02904	7.50345	7.54429	-0.0340782	7.59055	-0.131667	0.897984	0.9571	-6.94669	NonSig	1	Single-promoter
14	ENSG00000003756	RBM5	chr3	50088924	+	FALSE	1	FB-PB.3410.1,FB-PB.3410.2	5.72259	5.72259	5.36507	5.36507	Major	Major	5.91021	5.84659	6.01586	5.58816	5.25215	5.07365	5.63017	5.23009	5.34012	5.55133	5.91021	5.84659	6.01586	5.58816	5.25215	5.07365	5.63017	5.23009	5.34012	5.55133	-0.35752	5.54383	-1.99655	0.0751948	0.206023	-5.13582	NonSig	1	Single-promoter
15	ENSG00000004455	AK2	chr1	33036893	-	FALSE	1	FB-PB.96.1,FB-PB.96.2,FB-PB.96.3	5.02437	5.02437	5.20895	5.20895	Major	Major	4.1719	5.39951	5.05755	5.20328	5.28963	4.97717	4.80529	5.69206	5.30158	5.26865	4.1719	5.39951	5.05755	5.20328	5.28963	4.97717	4.80529	5.69206	5.30158	5.26865	0.184578	5.11666	0.709658	0.4949	0.669089	-6.68754	NonSig	1	Single-promoter
16	ENSG00000004478	FKBP4	chr12	2794993	+	FALSE	1	FB-PB.1092.1	4.91078	4.91078	4.8764	4.8764	Major	Major	5.7271	5.29773	4.2438	5.03323	4.25204	4.9264	4.68948	5.047	4.41194	5.30716	5.7271	5.29773	4.2438	5.03323	4.25204	4.9264	4.68948	5.047	4.41194	5.30716	-0.0343842	4.89359	-0.109347	0.915194	0.967025	-6.94963	NonSig	1	Single-promoter
17	ENSG00000004487	KDM1A	chr1	23019477	+	FALSE	1	FB-PB.58.1	4.59963	4.59963	4.98372	4.98372	Major	Major	4.43354	4.69586	4.84879	4.55638	4.46357	5.16408	4.91249	5.07917	4.84609	4.91673	4.43354	4.69586	4.84879	4.55638	4.46357	5.16408	4.91249	5.07917	4.84609	4.91673	0.384085	4.79167	3.0862	0.0121601	0.0632712	-3.35433	NonSig	1	Single-promoter
18	ENSG00000004534	RBM6	chr3	49940040	+	FALSE	1	FB-PB.3409.1,FB-PB.3409.2	4.08179	4.08179	4.18553	4.18553	Major	Major	4.6027	4.84763	2.6744	4.03217	4.25204	4.36497	4.80529	4.12123	3.99538	3.6408	4.6027	4.84763	2.6744	4.03217	4.25204	4.36497	4.80529	4.12123	3.99538	3.6408	0.103745	4.13366	0.259758	0.800571	0.892276	-6.91936	NonSig	1	Single-promoter
19	ENSG00000004660	CAMKK1	chr17	3892997	-	FALSE	1	FB-PB.2081.1	2.29242	2.29242	1.06633	1.06633	Major	Major	1.48133	2.27306	2.6744	3.03005	2.00325	1.6683	0	0.803701	0	2.85963	1.48133	2.27306	2.6744	3.03005	2.00325	1.6683	0	0.803701	0	2.85963	-1.22609	1.67937	-2.1813	0.0554023	0.168831	-4.84715	NonSig	1	Single-promoter
20	ENSG00000004700	RECQL	chr12	21501612	-	TRUE	1	FB-PB.1127.2,FB-PB.1127.1,FB-PB.1127.5,FB-PB.1127.4,FB-PB.1127.6,FB-PB.1127.7,FB-PB.1127.12,FB-PB.1127.9,FB-PB.1127.8,FB-PB.1127.10	5.84537	5.84537	6.18542	6.18542	NA	NA	6.367	5.55464	5.86855	5.78855	5.64811	5.87597	5.80731	6.74976	6.60139	5.89265	6.367	5.55464	5.86855	5.78855	5.64811	5.87597	5.80731	6.74976	6.60139	5.89265	0.340046	6.01539	1.40577	0.191523	0.366778	-5.97374	NonSig	1	Single-promoter
21	ENSG00000004766	VPS50	chr7	93232366	+	FALSE	1	FB-PB.4574.1	3.55404	3.55404	3.55393	3.55393	Major	Major	3.03003	3.84972	4.10024	3.61643	3.17378	3.92216	3.80124	2.63669	3.54569	3.8639	3.03003	3.84972	4.10024	3.61643	3.17378	3.92216	3.80124	2.63669	3.54569	3.8639	-0.000103386	3.55399	-0.000346478	0.999731	1	-6.95617	NonSig	1	Single-promoter
22	ENSG00000004866	ST7	chr7	116953501	+	FALSE	1	FB-PB.4628.1	3.69343	3.69343	4.37569	4.37569	Major	Major	3.18019	3.94257	4.80316	2.8368	3.70444	4.81916	3.80124	4.49963	4.17667	4.58177	3.18019	3.94257	4.80316	2.8368	3.70444	4.81916	3.80124	4.49963	4.17667	4.58177	0.682263	4.03456	1.8937	0.0889556	0.228244	-5.29209	NonSig	1	Single-promoter
23	ENSG00000004975	DVL2	chr17	7234507	-	FALSE	1	FB-PB.2098.1,FB-PB.2098.2	4.49112	4.49112	3.77499	3.77499	Major	Major	4.70536	4.69586	3.94079	4.35453	4.75906	3.69835	3.09572	3.51577	4.3377	4.22742	4.70536	4.69586	3.94079	4.35453	4.75906	3.69835	3.09572	3.51577	4.3377	4.22742	-0.716128	4.13306	-2.66877	0.0244663	0.100647	-4.05233	NonSig	1	Single-promoter
24	ENSG00000005020	SKAP2	chr7	26864590	-	FALSE	1	FB-PB.4473.1,FB-PB.4473.2	4.46574	4.46574	4.9198	4.9198	Major	Major	3.9389	4.7988	4.89303	3.93892	4.75906	5.6125	5.19327	4.7197	4.84609	4.22742	3.9389	4.7988	4.89303	3.93892	4.75906	5.6125	5.19327	4.7197	4.84609	4.22742	0.454053	4.69277	1.49683	0.166779	0.336826	-5.85546	NonSig	1	Single-promoter
25	ENSG00000005156	LIG3	chr17	34980512	+	FALSE	1	FB-PB.2155.1	3.13728	3.13728	3.65683	3.65683	Major	Major	2.6727	2.75493	3.4423	3.49064	3.32583	3.92216	3.80124	3.41852	4.08887	3.05334	2.6727	2.75493	3.4423	3.49064	3.32583	3.92216	3.80124	3.41852	4.08887	3.05334	0.519546	3.39705	2.07537	0.0660391	0.187889	-5.01381	NonSig	1	Single-promoter
27	ENSG00000005206	SPPL2B	chr19	2328670	+	FALSE	1	FB-PB.2418.1	5.39314	5.39314	4.49872	4.49872	Major	Major	6.03374	4.94061	5.43204	5.4258	5.13349	5.16408	5.1501	3.69256	4.25943	4.22742	6.03374	4.94061	5.43204	5.4258	5.13349	5.16408	5.1501	3.69256	4.25943	4.22742	-0.89442	4.94593	-2.75516	0.0211595	0.0920123	-3.90849	NonSig	1	Single-promoter
28	ENSG00000005238	ATOSB	chr9	35111479	-	FALSE	1	FB-PB.4971.1	1.519	1.519	1.44196	1.44196	Major	Major	0	2.53402	2.45587	1.01725	1.58785	2.42137	0	1.69453	1.04808	2.04584	0	2.53402	2.45587	1.01725	1.58785	2.42137	0	1.69453	1.04808	2.04584	-0.0770345	1.48048	-0.130771	0.898674	0.957315	-6.94682	NonSig	1	Single-promoter
30	ENSG00000005801	ZNF195	chr11	3379181	-	FALSE	1	FB-PB.824.1,FB-PB.824.3,FB-PB.824.2	3.10855	3.10855	3.16081	3.16081	Major	Major	3.44047	2.53402	3.55673	3.20045	2.81107	3.28001	3.68509	2.80004	2.3981	3.6408	3.44047	2.53402	3.55673	3.20045	2.81107	3.28001	3.68509	2.80004	2.3981	3.6408	0.0522572	3.13468	0.174054	0.865462	0.934662	-6.93961	NonSig	1	Single-promoter
31	ENSG00000005812	FBXL3	chr13	77027164	-	FALSE	1	FB-PB.1490.1,FB-PB.1490.2	5.3051	5.3051	4.41862	4.41862	Major	Major	4.89108	5.55464	5.54725	5.31883	5.21367	4.43928	4.19017	4.34943	4.41194	4.70228	4.89108	5.55464	5.54725	5.31883	5.21367	4.43928	4.19017	4.34943	4.41194	4.70228	-0.886475	4.86186	-5.50347	0.000308336	0.0061738	0.427439	NonSig	1	Single-promoter
32	ENSG00000005893	LAMP2	chrX	120449084	-	TRUE	2	FB-PB.5362.2	8.18907	15.0294	8.40159	15.1206	NA	NA	8.04186	8.30953	8.184	8.32881	8.08113	8.4672	8.22745	8.45705	8.30375	8.55249	14.7178	15.3147	14.5992	15.1442	15.3708	14.7983	14.7445	15.3764	15.0268	15.6572	0.212521	8.29533	1.84235	0.096679	0.240063	-5.36874	NonSig	2	Multiple-promoter
33	ENSG00000005893	LAMP2	chrX	120469315	-	FALSE	1	FB-PB.5362.1,FB-PB.5362.3,FB-PB.5362.4,FB-PB.5362.5,FB-PB.5362.6,FB-PB.5362.7	6.8403	15.0294	6.71905	15.1206	Minor	Minor	6.67598	7.00521	6.41523	6.81535	7.28971	6.33113	6.51705	6.91931	6.72303	7.10475	14.7178	15.3147	14.5992	15.1442	15.3708	14.7983	14.7445	15.3764	15.0268	15.6572	-0.121244	6.77967	-0.592772	0.567122	0.730533	-6.76728	NonSig	2	Multiple-promoter
34	ENSG00000006007	GDE1	chr16	19522094	-	FALSE	1	FB-PB.1931.2,FB-PB.1931.1	6.16679	6.16679	5.79089	5.79089	Major	Major	6.67598	6.20626	6.27183	5.58816	6.09173	5.6125	5.86183	5.71272	5.90032	5.8671	6.67598	6.20626	6.27183	5.58816	6.09173	5.6125	5.86183	5.71272	5.90032	5.8671	-0.375898	5.97884	-1.98747	0.0763228	0.207662	-5.14974	NonSig	1	Single-promoter
35	ENSG00000006125	AP2B1	chr17	35587283	+	FALSE	1	FB-PB.2160.1,FB-PB.2160.2,FB-PB.2160.3,FB-PB.2160.4	6.26422	13.0534	6.32727	14.0647	Major	Major	6.01387	5.74713	6.33733	6.60379	6.619	6.16587	6.21589	6.77944	6.09317	6.38199	11.8124	12.7551	13.4108	13.9484	13.3404	14.3939	14.049	15.3385	13.2117	13.3305	0.063049	6.29575	0.299429	0.771036	0.873044	-6.90732	NonSig	3	Multiple-promoter
36	ENSG00000006125	AP2B1	chr17	35587496	+	FALSE	2	FB-PB.2160.5	1.21639	13.0534	1.98127	14.0647	Minor	Minor	0	1.54436	0.923938	2.0258	1.58785	3.10843	2.08243	2.63669	1.04808	1.03072	11.8124	12.7551	13.4108	13.9484	13.3404	14.3939	14.049	15.3385	13.2117	13.3305	0.764879	1.59883	1.50844	0.163832	0.333105	-5.84004	NonSig	3	Multiple-promoter
37	ENSG00000006125	AP2B1	chr17	35624509	+	TRUE	3	FB-PB.2160.6	5.57279	13.0534	5.75615	14.0647	NA	NA	5.79852	5.46358	6.14951	5.31883	5.13349	5.11957	5.75065	5.92234	6.07043	5.91776	11.8124	12.7551	13.4108	13.9484	13.3404	14.3939	14.049	15.3385	13.2117	13.3305	0.183363	5.66447	0.75927	0.466043	0.646356	-6.64979	NonSig	3	Multiple-promoter
38	ENSG00000006194	ZNF263	chr16	3283503	+	FALSE	1	FB-PB.1903.2,FB-PB.1903.1,FB-PB.1903.3	4.79623	4.79623	3.91229	3.91229	Major	Major	5.13131	4.52623	5.37079	4.55638	4.39645	3.57192	3.90873	3.51577	4.25943	4.30559	5.13131	4.52623	5.37079	4.55638	4.39645	3.57192	3.90873	3.51577	4.25943	4.30559	-0.883941	4.35426	-3.57117	0.00548128	0.0371281	-2.54567	NonSig	1	Single-promoter
39	ENSG00000006282	SPATA20	chr17	50547189	+	FALSE	1	FB-PB.2227.1	0.400651	0.400651	0.418685	0.418685	Major	Major	0	0	0	0	2.00325	2.09343	0	0	0	0	0	0	0	0	2.00325	2.09343	0	0	0	0	0.0180349	0.409668	0.0335342	0.97394	1	-6.95556	NonSig	1	Single-promoter
40	ENSG00000006451	RALA	chr7	39623581	+	FALSE	1	FB-PB.4502.1	6.04232	6.04232	6.66614	6.66614	Major	Major	6.52975	6.14895	5.70447	6.30064	5.5278	6.46166	6.78029	6.70922	6.78021	6.59932	6.52975	6.14895	5.70447	6.30064	5.5278	6.46166	6.78029	6.70922	6.78021	6.59932	0.623818	6.35423	3.12754	0.0113525	0.0600257	-3.28506	NonSig	1	Single-promoter
41	ENSG00000006468	ETV1	chr7	13989668	-	FALSE	1	FB-PB.4453.2,FB-PB.4453.1	1.39222	1.39222	2.09744	2.09744	Major	Major	0	1.54436	0.923938	3.49064	1.00217	2.68841	2.40969	1.69453	1.64871	2.04584	0	1.54436	0.923938	3.49064	1.00217	2.68841	2.40969	1.69453	1.64871	2.04584	0.705216	1.74483	1.23861	0.245109	0.430627	-6.17784	NonSig	1	Single-promoter
42	ENSG00000006534	ALDH3B1	chr11	68010305	+	FALSE	1	FB-PB.972.1	3.97492	3.97492	3.44419	3.44419	Major	Major	4.02082	3.40377	4.2438	4.03217	4.17402	3.57192	3.80124	2.80004	4.41194	2.63581	4.02082	3.40377	4.2438	4.03217	4.17402	3.57192	3.80124	2.80004	4.41194	2.63581	-0.530727	3.70955	-1.55648	0.152124	0.316359	-5.7755	NonSig	1	Single-promoter
43	ENSG00000006576	PHTF2	chr7	77798848	+	FALSE	1	FB-PB.4548.1,FB-PB.4548.2	3.84307	3.84307	4.83845	4.83845	Major	Major	4.02082	3.26684	3.66274	3.93892	4.32605	4.81916	4.85989	4.54641	4.54987	5.4169	4.02082	3.26684	3.66274	3.93892	4.32605	4.81916	4.85989	4.54641	4.54987	5.4169	0.995372	4.34076	4.22644	0.00194868	0.0190873	-1.48308	NonSig	1	Single-promoter
44	ENSG00000006652	IFRD1	chr7	112450460	+	FALSE	1	FB-PB.4621.1	8.33042	8.33042	7.34442	7.34442	Major	Major	8.15049	8.41861	8.184	8.65626	8.24273	7.31229	7.41201	7.28614	7.4516	7.26007	8.15049	8.41861	8.184	8.65626	8.24273	7.31229	7.41201	7.28614	7.4516	7.26007	-0.985998	7.83742	-7.78074	1.9794e-05	0.00110095	3.26203	NonSig	1	Single-promoter
45	ENSG00000006695	COX10	chr17	14069515	+	FALSE	1	FB-PB.2111.1	3.50044	3.50044	3.90244	3.90244	Major	Major	3.31619	3.40377	3.94079	3.03005	3.81138	4.36497	2.90118	3.60687	4.25943	4.37975	3.31619	3.40377	3.94079	3.03005	3.81138	4.36497	2.90118	3.60687	4.25943	4.37975	0.402004	3.70144	1.26865	0.234656	0.420192	-6.14249	NonSig	1	Single-promoter
46	ENSG00000006715	VPS41	chr7	38909210	-	FALSE	1	FB-PB.4503.1,FB-PB.4503.2,FB-PB.4503.3	2.93638	2.93638	3.89169	3.89169	Major	Major	0	3.11553	4.02271	3.83923	3.70444	3.92216	3.90873	2.63669	4.84609	4.14476	0	3.11553	4.02271	3.83923	3.70444	3.92216	3.90873	2.63669	4.84609	4.14476	0.955306	3.41403	1.248	0.241802	0.427531	-6.16686	NonSig	1	Single-promoter
47	ENSG00000006744	ELAC2	chr17	13018018	-	FALSE	1	FB-PB.2109.1	4.79257	4.79257	5.07779	5.07779	Major	Major	4.37244	4.84763	5.33916	4.94005	4.46357	5.44224	5.01228	5.17161	4.84609	4.91673	4.37244	4.84763	5.33916	4.94005	4.46357	5.44224	5.01228	5.17161	4.84609	4.91673	0.285218	4.93518	1.38328	0.198102	0.376019	-6.00222	NonSig	1	Single-promoter
48	ENSG00000006831	ADIPOR2	chr12	1690992	+	FALSE	1	FB-PB.1090.1,FB-PB.1090.2,FB-PB.1090.3,FB-PB.1090.4	4.27438	4.27438	3.88219	3.88219	Major	Major	4.24189	4.58502	3.66274	4.35453	4.52771	3.57192	4.35129	4.59173	3.67191	3.2241	4.24189	4.58502	3.66274	4.35453	4.52771	3.57192	4.35129	4.59173	3.67191	3.2241	-0.392188	4.07828	-1.34769	0.208899	0.388911	-6.04666	NonSig	1	Single-promoter
49	ENSG00000007168	PAFAH1B1	chr17	2593629	+	FALSE	1	FB-PB.2085.1,FB-PB.2085.2,FB-PB.2085.3	6.84684	6.84684	6.34497	6.34497	Major	Major	7.19138	6.99441	6.77573	6.33765	6.93504	6.51418	6.72253	6.0084	6.83521	5.64453	7.19138	6.99441	6.77573	6.33765	6.93504	6.51418	6.72253	6.0084	6.83521	5.64453	-0.50187	6.59591	-1.93262	0.0834907	0.219837	-5.23337	NonSig	1	Single-promoter
50	ENSG00000007384	RHBDF1	chr16	72613	-	FALSE	1	FB-PB.1880.1,FB-PB.1880.2	5.32703	5.32703	4.50011	4.50011	Major	Major	5.84424	4.7988	5.70447	4.89111	5.39655	4.36497	5.01228	3.85003	5.04584	4.22742	5.84424	4.7988	5.70447	4.89111	5.39655	4.36497	5.01228	3.85003	5.04584	4.22742	-0.826923	4.91357	-2.76078	0.0209603	0.0917572	-3.89909	NonSig	1	Single-promoter
51	ENSG00000007541	PIGQ	chr16	569963	+	FALSE	1	FB-PB.1885.1	1.56767	1.56767	2.3018	2.3018	Major	Major	3.03003	0	2.19823	1.60792	1.00217	3.57192	1.65846	1.9936	3.25432	1.03072	3.03003	0	2.19823	1.60792	1.00217	3.57192	1.65846	1.9936	3.25432	1.03072	0.734137	1.93474	1.12574	0.287806	0.480454	-6.30508	NonSig	1	Single-promoter
52	ENSG00000007923	DNAJC11	chr1	6701829	-	FALSE	1	FB-PB.18.1,FB-PB.18.2,FB-PB.18.3	3.87208	3.87208	4.57327	4.57327	Major	Major	4.02082	3.11553	4.10024	4.11976	4.00406	4.97717	4.10232	4.63566	4.3377	4.81348	4.02082	3.11553	4.10024	4.11976	4.00406	4.97717	4.10232	4.63566	4.3377	4.81348	0.701187	4.22267	2.88628	0.0169803	0.0793901	-3.68932	NonSig	1	Single-promoter
53	ENSG00000008130	NADK	chr1	1778424	-	FALSE	1	FB-PB.6.1	3.89871	3.89871	3.85058	3.85058	Major	Major	4.43354	2.94647	4.84879	3.93892	3.32583	4.20377	3.26711	3.92276	3.99538	3.8639	4.43354	2.94647	4.84879	3.93892	3.32583	4.20377	3.26711	3.92276	3.99538	3.8639	-0.0481284	3.87465	-0.133547	0.896536	0.956102	-6.94642	NonSig	1	Single-promoter
54	ENSG00000008256	CYTH3	chr7	6272652	-	FALSE	1	FB-PB.4440.1	5.60782	5.60782	5.61294	5.61294	Major	Major	5.7751	5.11032	5.99571	5.4258	5.73217	5.73557	6.06139	5.23009	5.55195	5.48568	5.7751	5.11032	5.99571	5.4258	5.73217	5.73557	6.06139	5.23009	5.55195	5.48568	0.00511513	5.61038	0.0245269	0.980938	1	-6.95585	NonSig	1	Single-promoter
55	ENSG00000008283	CYB561	chr17	63446306	-	FALSE	1	FB-PB.2256.1,FB-PB.2256.2	2.35016	2.35016	2.5872	2.5872	Major	Major	3.9389	1.95424	0.923938	1.60792	3.32583	2.68841	2.67627	2.63669	2.88882	2.04584	3.9389	1.95424	0.923938	1.60792	3.32583	2.68841	2.67627	2.63669	2.88882	2.04584	0.237039	2.46868	0.443783	0.667098	0.805515	-6.84945	NonSig	1	Single-promoter
56	ENSG00000008311	AASS	chr7	122144300	-	FALSE	1	FB-PB.4634.1	3.78296	3.78296	2.56163	2.56163	Major	Major	2.45422	3.11553	4.84879	4.49218	4.00406	3.28001	2.40969	1.9936	2.07153	3.05334	2.45422	3.11553	4.84879	4.49218	4.00406	3.28001	2.40969	1.9936	2.07153	3.05334	-1.22132	3.1723	-2.56099	0.0293288	0.113027	-4.23092	NonSig	1	Single-promoter
58	ENSG00000008405	CRY1	chr12	107093549	-	FALSE	1	FB-PB.1319.1	6.30688	6.30688	6.18975	6.18975	Major	Major	7.04243	7.06839	5.4908	5.84104	6.09173	6.29156	5.96506	6.37527	6.30282	6.01404	7.04243	7.06839	5.4908	5.84104	6.09173	6.29156	5.96506	6.37527	6.30282	6.01404	-0.117131	6.24831	-0.371595	0.718317	0.839858	-6.88112	NonSig	1	Single-promoter
59	ENSG00000008513	ST3GAL1	chr8	133571915	-	FALSE	1	FB-PB.4910.2,FB-PB.4910.1	4.90645	4.90645	5.39207	5.39207	Major	Major	4.54849	5.11032	4.55042	5.31883	5.0042	5.67534	5.10561	5.3136	5.22127	5.64453	4.54849	5.11032	4.55042	5.31883	5.0042	5.67534	5.10561	5.3136	5.22127	5.64453	0.485619	5.14926	2.47586	0.0338417	0.122148	-4.37109	NonSig	1	Single-promoter
60	ENSG00000008838	MED24	chr17	40054408	-	FALSE	1	FB-PB.2172.1,FB-PB.2172.2	4.32624	4.32624	4.67339	4.67339	Major	Major	3.55488	4.18988	4.43547	4.9874	4.46357	4.87378	4.4962	4.7197	4.08887	5.18838	3.55488	4.18988	4.43547	4.9874	4.46357	4.87378	4.4962	4.7197	4.08887	5.18838	0.347149	4.49981	1.21641	0.253078	0.440714	-6.20358	NonSig	1	Single-promoter
61	ENSG00000008853	RHOBTB2	chr8	22999937	+	FALSE	1	FB-PB.4742.1	4.1723	4.1723	3.88044	3.88044	Major	Major	4.09833	3.11553	4.80316	4.84044	4.00406	3.43334	4.10232	4.40125	4.41194	3.05334	4.09833	3.11553	4.80316	4.84044	4.00406	3.43334	4.10232	4.40125	4.41194	3.05334	-0.291864	4.02637	-0.74476	0.474369	0.653137	-6.66107	NonSig	1	Single-promoter
62	ENSG00000008952	SEC62	chr3	169966807	+	FALSE	1	FB-PB.3595.4,FB-PB.3595.3,FB-PB.3595.2,FB-PB.3595.1,FB-PB.3595.5	6.30116	6.30116	6.20936	6.20936	Major	Major	6.01387	6.14895	6.32123	6.54172	6.48002	6.05207	6.0845	6.12087	6.15932	6.63003	6.01387	6.14895	6.32123	6.54172	6.48002	6.05207	6.0845	6.12087	6.15932	6.63003	-0.0917989	6.25526	-0.577038	0.577279	0.735777	-6.77701	NonSig	1	Single-promoter
63	ENSG00000009307	CSDE1	chr1	114725268	-	TRUE	6	FB-PB.284.7	7.88186	47.349	8.36579	49.2069	NA	NA	7.26045	8.02635	8.18845	8.02285	7.91121	8.65823	8.13639	8.40088	8.15496	8.47848	45.9784	47.782	47.8414	47.9829	47.1606	49.5316	48.4484	49.5473	48.3146	50.1925	0.483927	8.12382	2.49341	0.0328582	0.120297	-4.34227	NonSig	6	Multiple-promoter
64	ENSG00000009307	CSDE1	chr1	114730557	-	TRUE	5	FB-PB.284.6	8.89787	47.349	8.89036	49.2069	NA	NA	8.89722	8.99676	8.76285	8.82538	9.00714	8.77761	8.80561	8.98866	8.88556	8.99437	45.9784	47.782	47.8414	47.9829	47.1606	49.5316	48.4484	49.5473	48.3146	50.1925	-0.0075091	8.89412	-0.0711681	0.944734	0.986908	-6.9534	NonSig	6	Multiple-promoter
65	ENSG00000009307	CSDE1	chr1	114734107	-	TRUE	4	FB-PB.284.18	8.13722	47.349	8.47565	49.2069	NA	NA	7.78482	8.23806	8.02908	8.43507	8.19908	8.46276	8.62036	8.57174	8.15496	8.56843	45.9784	47.782	47.8414	47.9829	47.1606	49.5316	48.4484	49.5473	48.3146	50.1925	0.338426	8.30644	2.20782	0.0530101	0.163153	-4.805	NonSig	6	Multiple-promoter
66	ENSG00000009307	CSDE1	chr1	114739829	-	TRUE	3	FB-PB.284.13	8.25949	47.349	8.67366	49.2069	NA	NA	8.13678	8.40644	8.24927	8.45626	8.04871	8.53655	8.65936	8.64612	8.52897	8.99732	45.9784	47.782	47.8414	47.9829	47.1606	49.5316	48.4484	49.5473	48.3146	50.1925	0.414171	8.46658	3.03101	0.0133312	0.0672223	-3.44685	NonSig	6	Multiple-promoter
67	ENSG00000009307	CSDE1	chr1	114750086	-	TRUE	2	FB-PB.284.10,FB-PB.284.17	8.37944	47.349	8.65444	49.2069	NA	NA	8.35383	8.44662	8.33995	8.3516	8.4052	8.70793	8.50518	8.83461	8.5902	8.63429	45.9784	47.782	47.8414	47.9829	47.1606	49.5316	48.4484	49.5473	48.3146	50.1925	0.275002	8.51694	2.68491	0.0238112	0.0991305	-4.02549	NonSig	6	Multiple-promoter
68	ENSG00000009307	CSDE1	chr1	114758000	-	FALSE	1	FB-PB.284.1,FB-PB.284.2,FB-PB.284.3,FB-PB.284.4,FB-PB.284.5,FB-PB.284.9,FB-PB.284.8,FB-PB.284.11,FB-PB.284.12,FB-PB.284.14,FB-PB.284.15	5.79315	47.349	6.14697	49.2069	Minor	Minor	5.54528	5.66776	6.27183	5.89169	5.58921	6.38852	5.72146	6.10533	5.99997	6.51956	45.9784	47.782	47.8414	47.9829	47.1606	49.5316	48.4484	49.5473	48.3146	50.1925	0.353814	5.97006	1.78287	0.106399	0.253572	-5.45627	NonSig	6	Multiple-promoter
69	ENSG00000009335	UBE3C	chr7	157183992	+	FALSE	1	FB-PB.4698.1	5.54515	5.54515	5.46553	5.46553	Major	Major	6.72568	5.4319	5.67943	4.49218	5.39655	5.44224	4.80529	5.99159	5.41424	5.6743	6.72568	5.4319	5.67943	4.49218	5.39655	5.44224	4.80529	5.99159	5.41424	5.6743	-0.0796159	5.50534	-0.20796	0.839633	0.920964	-6.93255	NonSig	1	Single-promoter
71	ENSG00000009844	VTA1	chr6	142147231	+	FALSE	1	FB-PB.4376.1,FB-PB.4376.2	5.63433	5.63433	6.07035	6.07035	Major	Major	4.89108	5.89386	5.89054	5.4258	6.07036	6.23008	5.66125	6.43864	5.51874	6.50306	4.89108	5.89386	5.89054	5.4258	6.07036	6.23008	5.66125	6.43864	5.51874	6.50306	0.436025	5.85234	1.53697	0.156787	0.322972	-5.80186	NonSig	1	Single-promoter
73	ENSG00000010165	METTL13	chr1	171781696	+	FALSE	1	FB-PB.402.1	3.96672	3.96672	3.59289	3.59289	Major	Major	4.30864	4.52623	3.94079	3.73212	3.32583	3.28001	3.42029	3.992	3.8954	3.37677	4.30864	4.52623	3.94079	3.73212	3.32583	3.28001	3.42029	3.992	3.8954	3.37677	-0.37383	3.77981	-1.4897	0.16861	0.339648	-5.86488	NonSig	1	Single-promoter
74	ENSG00000010244	ZNF207	chr17	32350152	+	FALSE	1	FB-PB.2152.1,FB-PB.2152.2	7.45082	7.45082	8.02658	8.02658	Major	Major	6.51569	8.02104	7.2022	7.67798	7.83721	7.89752	8.02134	8.22511	7.60189	8.38705	6.51569	8.02104	7.2022	7.67798	7.83721	7.89752	8.02134	8.22511	7.60189	8.38705	0.57576	7.7387	1.98371	0.0767951	0.20808	-5.15551	NonSig	1	Single-promoter
75	ENSG00000010361	FUZ	chr19	49813292	-	FALSE	1	FB-PB.2580.1	2.55115	2.55115	3.06247	3.06247	Major	Major	0.922984	3.11553	3.55673	2.34943	2.81107	2.68841	3.42029	2.80004	2.88882	3.51481	0.922984	3.11553	3.55673	2.34943	2.81107	2.68841	3.42029	2.80004	2.88882	3.51481	0.511325	2.80681	1.13485	0.284154	0.474965	-6.29515	NonSig	1	Single-promoter
76	ENSG00000010404	IDS	chrX	149505340	-	FALSE	1	FB-PB.5384.1	6.39053	6.39053	5.05064	5.05064	Major	Major	6.9721	6.52427	6.44526	6.09988	5.91115	5.24918	4.80529	4.98041	5.30158	4.91673	6.9721	6.52427	6.44526	6.09988	5.91115	5.24918	4.80529	4.98041	5.30158	4.91673	-1.33989	5.72058	-6.41965	9.45522e-05	0.00301183	1.65254	DownReg	1	Single-promoter
77	ENSG00000011007	ELOA	chr1	23743455	+	FALSE	1	FB-PB.61.1	4.30875	4.30875	4.76975	4.76975	Major	Major	4.24189	4.89487	3.66274	4.49218	4.25204	5.28991	3.80124	5.39254	4.17667	5.18838	4.24189	4.89487	3.66274	4.49218	4.25204	5.28991	3.80124	5.39254	4.17667	5.18838	0.461004	4.53925	1.27738	0.231688	0.41621	-6.1321	NonSig	1	Single-promoter
78	ENSG00000011028	MRC2	chr17	62627684	+	FALSE	1	FB-PB.2255.1,FB-PB.2255.2	6.91692	21.2634	6.21838	19.3087	Minor	Minor	6.98236	6.79718	7.19338	6.87949	6.73222	6.38852	6.51705	5.99159	6.18072	6.01404	22.2328	21.1137	21.6392	20.5458	20.7856	19.2375	20.2798	18.8159	19.5603	18.6498	-0.698541	6.56765	-4.71578	0.000935171	0.0123928	-0.723581	NonSig	3	Multiple-promoter
79	ENSG00000011028	MRC2	chr17	62677325	+	TRUE	2	FB-PB.2255.3	7.08472	21.2634	6.70383	19.3087	NA	NA	7.31017	7.15824	7.1666	6.7619	7.02667	6.47938	7.19558	6.6136	6.58544	6.64515	22.2328	21.1137	21.6392	20.5458	20.7856	19.2375	20.2798	18.8159	19.5603	18.6498	-0.380888	6.89427	-2.27529	0.0473666	0.15162	-4.69705	NonSig	3	Multiple-promoter
80	ENSG00000011028	MRC2	chr17	62689731	+	TRUE	3	FB-PB.2255.4	7.26175	21.2634	6.38645	19.3087	NA	NA	7.94027	7.15824	7.27922	6.90437	7.02667	6.36964	6.56713	6.21074	6.79416	5.99056	22.2328	21.1137	21.6392	20.5458	20.7856	19.2375	20.2798	18.8159	19.5603	18.6498	-0.875306	6.8241	-3.86799	0.00340778	0.0276073	-2.05873	NonSig	3	Multiple-promoter
81	ENSG00000011198	ABHD5	chr3	43690975	+	FALSE	1	FB-PB.3371.1	3.48809	3.48809	1.60463	1.60463	Major	Major	4.70536	4.0298	2.86414	3.03005	2.81107	0	0	3.31424	3.08311	1.62578	4.70536	4.0298	2.86414	3.03005	2.81107	0	0	3.31424	3.08311	1.62578	-1.88346	2.54636	-2.52451	0.0311842	0.116221	-4.29109	NonSig	1	Single-promoter
82	ENSG00000011275	RNF216	chr7	5781679	-	FALSE	1	FB-PB.4436.1,FB-PB.4436.2,FB-PB.4436.3	4.53625	4.53625	4.45427	4.45427	Major	Major	3.66089	4.26371	5.05755	4.94005	4.75906	3.92216	3.68509	4.7197	4.67574	5.26865	3.66089	4.26371	5.05755	4.94005	4.75906	3.92216	3.68509	4.7197	4.67574	5.26865	-0.0819847	4.49526	-0.225117	0.826638	0.912844	-6.9285	NonSig	1	Single-promoter
83	ENSG00000011304	PTBP1	chr19	797415	+	FALSE	1	FB-PB.2412.3,FB-PB.2412.2,FB-PB.2412.1	7.22401	7.22401	7.61857	7.61857	Major	Major	7.1001	6.91643	7.09266	7.5887	7.42216	7.83695	7.66292	7.82597	7.47776	7.28923	7.1001	6.91643	7.09266	7.5887	7.42216	7.83695	7.66292	7.82597	7.47776	7.28923	0.394554	7.42129	2.30224	0.0452798	0.147278	-4.65366	NonSig	1	Single-promoter
84	ENSG00000011376	LARS2	chr3	45388542	+	FALSE	1	FB-PB.3378.1	2.84168	2.84168	3.45724	3.45724	Major	Major	3.31619	2.75493	3.94079	1.60792	2.58858	3.28001	3.42029	3.77344	4.17667	2.63581	3.31619	2.75493	3.94079	1.60792	2.58858	3.28001	3.42029	3.77344	4.17667	2.63581	0.615563	3.14946	1.41193	0.189757	0.364982	-5.9659	NonSig	1	Single-promoter
85	ENSG00000011454	RABGAP1	chr9	122941022	+	FALSE	1	FB-PB.5096.1	1.52244	1.52244	1.62972	1.62972	Major	Major	0	2.75493	0.923938	1.60792	2.3254	0	2.40969	2.63669	2.07153	1.03072	0	2.75493	0.923938	1.60792	2.3254	0	2.40969	2.63669	2.07153	1.03072	0.107287	1.57608	0.166842	0.870979	0.93826	-6.94096	NonSig	1	Single-promoter
86	ENSG00000011523	CEP68	chr2	65056435	+	FALSE	1	FB-PB.2731.1	0.988996	0.988996	1.07989	1.07989	Major	Major	0	0	0.923938	1.01725	3.00379	1.6683	2.08243	0	1.64871	0	0	0	0.923938	1.01725	3.00379	1.6683	2.08243	0	1.64871	0	0.090893	1.03444	0.138914	0.892408	0.952972	-6.94562	NonSig	1	Single-promoter
87	ENSG00000012061	ERCC1	chr19	45423916	-	FALSE	1	FB-PB.2560.1,FB-PB.2560.2	4.86276	4.86276	4.99322	4.99322	Major	Major	4.09833	3.94257	4.89303	5.49296	5.88691	5.51277	4.85989	4.67829	4.99844	4.91673	4.09833	3.94257	4.89303	5.49296	5.88691	5.51277	4.85989	4.67829	4.99844	4.91673	0.130466	4.92799	0.342946	0.739078	0.852164	-6.89218	NonSig	1	Single-promoter
88	ENSG00000012174	MBTPS2	chrX	21839629	+	FALSE	1	FB-PB.5259.1	4.255	4.255	4.33827	4.33827	Major	Major	4.49216	2.75493	4.93595	4.28044	4.81154	4.43928	3.90873	4.34943	4.61418	4.37975	4.49216	2.75493	4.93595	4.28044	4.81154	4.43928	3.90873	4.34943	4.61418	4.37975	0.0832706	4.29664	0.21632	0.833295	0.916577	-6.93062	NonSig	1	Single-promoter
89	ENSG00000012822	CALCOCO1	chr12	53727451	-	FALSE	1	FB-PB.1193.1	4.00026	4.00026	3.35752	3.35752	Major	Major	3.31619	3.94257	3.85393	4.49218	4.39645	3.69835	3.26711	3.41852	2.88882	3.51481	3.31619	3.94257	3.85393	4.49218	4.39645	3.69835	3.26711	3.41852	2.88882	3.51481	-0.642739	3.67889	-2.61177	0.0269278	0.106461	-4.14691	NonSig	1	Single-promoter
90	ENSG00000012983	MAP4K5	chr14	50532596	-	FALSE	1	FB-PB.1582.1	3.50769	3.50769	3.72384	3.72384	Major	Major	1.88288	4.58502	2.86414	4.20234	4.00406	3.92216	2.90118	3.60687	3.54569	4.64328	1.88288	4.58502	2.86414	4.20234	4.00406	3.92216	2.90118	3.60687	3.54569	4.64328	0.216151	3.61576	0.40683	0.693112	0.822664	-6.86634	NonSig	1	Single-promoter
91	ENSG00000013016	EHD3	chr2	31233953	+	FALSE	1	FB-PB.2653.1,FB-PB.2653.2	2.27541	2.27541	3.75444	3.75444	Major	Major	2.6727	2.53402	3.55673	2.6136	0	3.28001	3.55876	4.18175	3.78798	3.96372	2.6727	2.53402	3.55673	2.6136	0	3.28001	3.55876	4.18175	3.78798	3.96372	1.47903	3.01493	2.58108	0.0283545	0.110211	-4.19772	NonSig	1	Single-promoter
92	ENSG00000013288	MAN2B2	chr4	6575174	+	FALSE	1	FB-PB.3678.1	5.16936	5.16936	4.64153	4.64153	Major	Major	4.75408	5.06973	5.37079	5.03323	5.61896	4.7033	4.4962	4.83725	4.41194	4.75895	4.75408	5.06973	5.37079	5.03323	5.61896	4.7033	4.4962	4.83725	4.41194	4.75895	-0.527828	4.90544	-2.96973	0.0147671	0.0720519	-3.54955	NonSig	1	Single-promoter
93	ENSG00000013297	CLDN11	chr3	170418868	+	FALSE	1	FB-PB.3599.1	4.61515	4.61515	2.9437	2.9437	Major	Major	4.80121	4.18988	4.60463	4.61784	4.86217	3.28001	3.26711	2.45245	3.08311	2.63581	4.80121	4.18988	4.60463	4.61784	4.86217	3.28001	3.26711	2.45245	3.08311	2.63581	-1.67145	3.77942	-8.04295	1.49924e-05	0.00103053	3.54581	DownReg	1	Single-promoter
94	ENSG00000013374	NUB1	chr7	151341770	+	FALSE	1	FB-PB.4691.1,FB-PB.4691.2	3.99228	3.99228	3.2113	3.2113	Major	Major	4.43354	3.26684	3.66274	3.83923	4.75906	2.91365	2.08243	3.51577	3.78798	3.75666	4.43354	3.26684	3.66274	3.83923	4.75906	2.91365	2.08243	3.51577	3.78798	3.75666	-0.780987	3.60179	-1.98082	0.0771601	0.208924	-5.15994	NonSig	1	Single-promoter
95	ENSG00000013375	PGM3	chr6	83193265	-	FALSE	1	FB-PB.4296.1,FB-PB.4296.2,FB-PB.4296.3	3.1457	3.1457	5.21952	5.21952	Major	Major	2.6727	3.40377	3.0318	3.61643	3.00379	5.58002	4.91249	6.12087	4.3377	5.14651	2.6727	3.40377	3.0318	3.61643	3.00379	5.58002	4.91249	6.12087	4.3377	5.14651	2.07382	4.18261	6.34824	0.000103265	0.00306398	1.56134	UpReg	1	Single-promoter
96	ENSG00000013441	CLK1	chr2	200864690	-	FALSE	1	FB-PB.2927.1	10.0312	10.0312	9.67165	9.67165	Major	Major	9.35558	10.283	9.61036	10.6943	10.2126	9.5068	9.75081	9.74176	9.33524	10.0236	9.35558	10.283	9.61036	10.6943	10.2126	9.5068	9.75081	9.74176	9.33524	10.0236	-0.359505	9.8514	-1.37716	0.199922	0.377673	-6.00991	NonSig	1	Single-promoter
97	ENSG00000013523	ANGEL1	chr14	76812882	-	FALSE	1	FB-PB.1661.1	3.45408	3.45408	3.38375	3.38375	Major	Major	3.85205	2.27306	3.94079	3.20045	4.00406	3.57192	3.55876	2.94676	3.78798	3.05334	3.85205	2.27306	3.94079	3.20045	4.00406	3.57192	3.55876	2.94676	3.78798	3.05334	-0.0703296	3.41892	-0.202842	0.84352	0.923418	-6.9337	NonSig	1	Single-promoter
98	ENSG00000013561	RNF14	chr5	141969111	+	FALSE	1	FB-PB.4121.1	3.75421	3.75421	3.0105	3.0105	Major	Major	3.03003	3.40377	4.65688	4.35453	3.32583	2.91365	3.42029	3.41852	2.66422	2.63581	3.03003	3.40377	4.65688	4.35453	3.32583	2.91365	3.42029	3.41852	2.66422	2.63581	-0.74371	3.38235	-2.17415	0.0560652	0.170027	-4.85849	NonSig	1	Single-promoter
99	ENSG00000013573	DDX11	chr12	31073869	+	FALSE	1	FB-PB.1145.1	2.11688	2.11688	2.20988	2.20988	Major	Major	1.48133	2.75493	4.02271	0	2.3254	2.91365	3.42029	2.63669	1.04808	1.03072	1.48133	2.75493	4.02271	0	2.3254	2.91365	3.42029	2.63669	1.04808	1.03072	0.0930096	2.16338	0.121247	0.906012	0.961642	-6.94813	NonSig	1	Single-promoter
100	ENSG00000013619	MAMLD1	chrX	150363280	+	FALSE	1	FB-PB.5383.1	2.66689	2.66689	1.56103	1.56103	Major	Major	2.45422	3.26684	2.6744	2.6136	2.3254	1.6683	0	1.69453	2.07153	2.37077	2.45422	3.26684	2.6744	2.6136	2.3254	1.6683	0	1.69453	2.07153	2.37077	-1.10586	2.11396	-2.67104	0.0243733	0.100624	-4.04856	NonSig	1	Single-promoter
101	ENSG00000013810	TACC3	chr4	1721519	+	FALSE	1	FB-PB.3667.1	0.296526	0.296526	3.1131	3.1131	Major	Major	0	0	1.48263	0	0	3.43334	2.08243	3.07993	2.66422	4.30559	0	0	1.48263	0	0	3.43334	2.08243	3.07993	2.66422	4.30559	2.81658	1.70481	6.32511	0.000106271	0.00307202	1.53165	UpReg	1	Single-promoter
102	ENSG00000014123	UFL1	chr6	96521841	+	FALSE	1	FB-PB.4316.1	4.72664	4.72664	4.62055	4.62055	Major	Major	5.30485	4.18988	4.55042	4.94005	4.64802	5.11957	4.10232	4.67829	3.8954	5.30716	5.30485	4.18988	4.55042	4.94005	4.64802	5.11957	4.10232	4.67829	3.8954	5.30716	-0.106094	4.6736	-0.334171	0.745482	0.856791	-6.89539	NonSig	1	Single-promoter
103	ENSG00000014164	ZC3H3	chr8	143541444	-	FALSE	1	FB-PB.4920.1	0	0	0	0	Inactive	Inactive	0	0	0	0	0	0	0	0	0	0	0	0	0	0	0	0	0	0	0	0	0	0	0	1	1	-6.95617	NonSig	1	Single-promoter
104	ENSG00000014641	MDH1	chr2	63588963	+	FALSE	1	FB-PB.2726.1	6.25336	6.25336	6.24495	6.24495	Major	Major	6.68857	6.22486	6.22067	5.78855	6.34413	5.97921	6.17341	6.80852	6.15932	6.1043	6.68857	6.22486	6.22067	5.78855	6.34413	5.97921	6.17341	6.80852	6.15932	6.1043	-0.00840333	6.24916	-0.0407111	0.968366	0.997911	-6.95527	NonSig	1	Single-promoter
105	ENSG00000014824	SLC30A9	chr4	41990521	+	FALSE	1	FB-PB.3710.1,FB-PB.3710.2,FB-PB.3710.3	5.45549	5.45549	5.80626	5.80626	Major	Major	5.16773	5.58376	5.27374	5.78855	5.46367	6.05207	5.56594	5.67111	5.61617	6.126	5.16773	5.58376	5.27374	5.78855	5.46367	6.05207	5.56594	5.67111	5.61617	6.126	0.350767	5.63087	2.05016	0.068845	0.192805	-5.05303	NonSig	1	Single-promoter
106	ENSG00000014919	COX15	chr10	99732112	-	FALSE	1	FB-PB.742.1	2.94133	2.94133	2.76069	2.76069	Major	Major	3.85205	4.58502	4.2438	2.0258	0	2.68841	3.09572	2.24119	3.40734	2.37077	3.85205	4.58502	4.2438	2.0258	0	2.68841	3.09572	2.24119	3.40734	2.37077	-0.180645	2.85101	-0.221528	0.829352	0.914295	-6.92938	NonSig	1	Single-promoter
107	ENSG00000015171	ZMYND11	chr10	134922	+	FALSE	1	FB-PB.558.1,FB-PB.558.2	2.22953	6.44783	2.2536	5.92613	Minor	Minor	0	2.94647	2.6744	3.93892	1.58785	0	1.65846	3.07993	2.88882	3.6408	4.30864	6.88903	7.27903	7.77815	5.9843	2.68841	4.75418	7.75822	7.14825	7.28159	0.0240721	2.24156	0.0279863	0.97825	1	-6.95575	NonSig	2	Multiple-promoter
108	ENSG00000015171	ZMYND11	chr10	135474	+	FALSE	2	FB-PB.558.3,FB-PB.558.4,FB-PB.558.5	4.2183	6.44783	3.67253	5.92613	Major	Major	4.30864	3.94257	4.60463	3.83923	4.39645	2.68841	3.09572	4.67829	4.25943	3.6408	4.30864	6.88903	7.27903	7.77815	5.9843	2.68841	4.75418	7.75822	7.14825	7.28159	-0.545774	3.94542	-1.47895	0.171406	0.343874	-5.87905	NonSig	2	Multiple-promoter
109	ENSG00000015475	BID	chr22	17774456	-	FALSE	1	FB-PB.3187.1	2.84498	2.84498	3.78937	3.78937	Major	Major	3.66089	2.75493	2.45587	2.34943	3.00379	3.69835	3.26711	4.49963	3.25432	4.22742	3.66089	2.75493	2.45587	2.34943	3.00379	3.69835	3.26711	4.49963	3.25432	4.22742	0.944385	3.31717	2.89369	0.0167709	0.0786928	-3.67692	NonSig	1	Single-promoter
110	ENSG00000015479	MATR3	chr5	139293691	+	FALSE	1	FB-PB.4109.2,FB-PB.4109.3,FB-PB.4109.4,FB-PB.4109.5,FB-PB.4109.6,FB-PB.4109.7,FB-PB.4109.8,FB-PB.4109.9,FB-PB.4109.10,FB-PB.4109.11,FB-PB.4109.12,FB-PB.4109.13	6.42476	6.42476	6.06148	6.06148	Major	Major	6.7855	6.10945	6.30495	6.46017	6.46372	5.67534	6.10725	6.34912	5.92589	6.24981	6.7855	6.10945	6.30495	6.46017	6.46372	5.67534	6.10725	6.34912	5.92589	6.24981	-0.363274	6.24312	-2.09881	0.0635284	0.183789	-4.97718	NonSig	1	Single-promoter
111	ENSG00000015676	NUDCD3	chr7	44490636	-	FALSE	1	FB-PB.4513.1	5.54598	5.54598	5.1693	5.1693	Major	Major	5.82156	5.11032	5.5193	5.81504	5.46367	4.97717	5.66125	4.98041	5.26198	4.96571	5.82156	5.11032	5.5193	5.81504	5.46367	4.97717	5.66125	4.98041	5.26198	4.96571	-0.376672	5.35764	-1.9495	0.0812196	0.216328	-5.20773	NonSig	1	Single-promoter
112	ENSG00000017260	ATP2C1	chr3	130894074	+	FALSE	1	FB-PB.3528.1,FB-PB.3528.2,FB-PB.3528.3	5.61787	5.61787	5.33636	5.33636	Major	Major	5.86656	6.10945	4.93595	5.58816	5.58921	5.07365	5.72146	4.91061	5.70744	5.26865	5.86656	6.10945	4.93595	5.58816	5.58921	5.07365	5.72146	4.91061	5.70744	5.26865	-0.281506	5.47711	-1.12575	0.287804	0.480454	-6.30507	NonSig	1	Single-promoter
113	ENSG00000017797	RALBP1	chr18	9475600	+	FALSE	1	FB-PB.2324.1	2.21064	2.21064	2.34857	2.34857	Major	Major	3.03003	2.53402	0	2.0258	3.46337	2.42137	3.26711	2.80004	3.25432	0	3.03003	2.53402	0	2.0258	3.46337	2.42137	3.26711	2.80004	3.25432	0	0.137924	2.27961	0.174852	0.864852	0.934662	-6.93946	NonSig	1	Single-promoter
114	ENSG00000018189	RUFY3	chr4	70721908	+	FALSE	1	FB-PB.3739.1	4.82329	4.82329	4.31685	4.31685	Major	Major	3.66089	5.52492	5.54725	4.425	4.95839	3.43334	4.42556	4.49963	5.26198	3.96372	3.66089	5.52492	5.54725	4.425	4.95839	3.43334	4.42556	4.49963	5.26198	3.96372	-0.506444	4.57007	-1.15702	0.275421	0.466941	-6.27072	NonSig	1	Single-promoter
115	ENSG00000018408	WWTR1	chr3	149658028	-	FALSE	1	FB-PB.3566.1,FB-PB.3566.2,FB-PB.3566.3,FB-PB.3566.4	7.28507	7.28507	6.65643	6.65643	Major	Major	7.68156	7.04763	6.94288	7.37394	7.37935	6.40716	7.01491	6.34912	7.02459	6.48638	7.68156	7.04763	6.94288	7.37394	7.37935	6.40716	7.01491	6.34912	7.02459	6.48638	-0.628641	6.97075	-3.10578	0.0117705	0.0618186	-3.32152	NonSig	1	Single-promoter
116	ENSG00000018510	AGPS	chr2	177392773	+	FALSE	1	FB-PB.2886.1,FB-PB.2886.2	5.09329	5.09329	5.45115	5.45115	Major	Major	4.70536	5.29773	5.57467	4.425	5.46367	5.47794	6.03791	4.87439	4.99844	5.8671	4.70536	5.29773	5.57467	4.425	5.46367	5.47794	6.03791	4.87439	4.99844	5.8671	0.357867	5.27222	1.1667	0.271674	0.461897	-6.25995	NonSig	1	Single-promoter
117	ENSG00000019144	PHLDB1	chr11	118607618	+	FALSE	1	FB-PB.1050.1,FB-PB.1050.2	5.70867	5.70867	5.17954	5.17954	Major	Major	5.82156	5.89386	5.4908	5.84104	5.49609	4.36497	5.63017	5.11065	5.92589	4.86603	5.82156	5.89386	5.4908	5.84104	5.49609	4.36497	5.63017	5.11065	5.92589	4.86603	-0.52913	5.44411	-1.89257	0.0891196	0.228273	-5.29379	NonSig	1	Single-promoter
118	ENSG00000019549	SNAI2	chr8	48921429	-	FALSE	1	FB-PB.4791.1	8.5864	8.5864	8.45311	8.45311	Major	Major	8.4714	8.4663	8.83265	9.02291	8.13875	8.00541	8.49228	9.02834	8.37971	8.35982	8.4714	8.4663	8.83265	9.02291	8.13875	8.00541	8.49228	9.02834	8.37971	8.35982	-0.13329	8.51976	-0.592655	0.567198	0.730533	-6.76735	NonSig	1	Single-promoter
119	ENSG00000020129	NCDN	chr1	35557790	+	TRUE	1	FB-PB.106.1,FB-PB.106.2	3.19046	3.19046	4.37154	4.37154	NA	NA	4.37244	2.75493	3.66274	2.8368	2.3254	4.28662	4.19017	4.45128	4.54987	4.37975	4.37244	2.75493	3.66274	2.8368	2.3254	4.28662	4.19017	4.45128	4.54987	4.37975	1.18107	3.781	3.36263	0.00770027	0.0460523	-2.89201	UpReg	1	Single-promoter
121	ENSG00000020577	SAMD4A	chr14	54566124	+	FALSE	1	FB-PB.1600.1	5.00802	5.00802	4.22224	4.22224	Major	Major	5.65196	4.98495	4.65688	4.78793	4.95839	4.11587	4.35129	4.23984	4.25943	4.14476	5.65196	4.98495	4.65688	4.78793	4.95839	4.11587	4.35129	4.23984	4.25943	4.14476	-0.785785	4.61513	-4.27674	0.00180419	0.0183466	-1.40353	NonSig	1	Single-promoter
122	ENSG00000020922	MRE11	chr11	94493853	-	FALSE	1	FB-PB.1007.1,FB-PB.1007.2,FB-PB.1007.3	1.78132	1.78132	2.80903	2.80903	Major	Major	1.88288	1.95424	2.45587	2.6136	0	3.81459	1.65846	2.63669	2.07153	3.8639	1.88288	1.95424	2.45587	2.6136	0	3.81459	1.65846	2.63669	2.07153	3.8639	1.02772	2.29517	1.71498	0.11859	0.269979	-5.55443	NonSig	1	Single-promoter
123	ENSG00000021574	SPAST	chr2	32063954	+	FALSE	1	FB-PB.2657.1	4.37972	4.37972	3.99288	3.99288	Major	Major	4.49216	4.18988	4.84879	4.55638	3.81138	3.81459	4.19017	3.85003	3.40734	4.70228	4.49216	4.18988	4.84879	4.55638	3.81138	3.81459	4.19017	3.85003	3.40734	4.70228	-0.386835	4.1863	-1.43197	0.1841	0.358501	-5.9402	NonSig	1	Single-promoter
124	ENSG00000021776	AQR	chr15	34969782	-	FALSE	1	FB-PB.1720.1,FB-PB.1720.2	4.17566	4.17566	3.4773	3.4773	Major	Major	5.13131	4.33395	3.66274	3.93892	3.81138	3.10843	3.55876	3.77344	2.88882	4.05708	5.13131	4.33395	3.66274	3.93892	3.81138	3.10843	3.55876	3.77344	2.88882	4.05708	-0.698359	3.82648	-2.16413	0.0570069	0.171283	-4.87436	NonSig	1	Single-promoter
125	ENSG00000022840	RNF10	chr12	120534352	+	FALSE	1	FB-PB.1365.1,FB-PB.1365.3,FB-PB.1365.2,FB-PB.1365.4,FB-PB.1365.5	6.9982	6.9982	6.52651	6.52651	Major	Major	7.29379	7.02658	6.81075	7.02271	6.83719	6.38852	6.58344	6.33586	6.82166	6.50306	7.29379	7.02658	6.81075	7.02271	6.83719	6.38852	6.58344	6.33586	6.82166	6.50306	-0.471693	6.76236	-3.33849	0.0080116	0.0472021	-2.93227	NonSig	1	Single-promoter
126	ENSG00000023041	ZDHHC6	chr10	112446947	-	FALSE	1	FB-PB.778.1	4.03944	4.03944	4.29948	4.29948	Major	Major	4.70536	3.26684	3.94079	4.03217	4.25204	4.43928	4.10232	4.34943	4.08887	4.51753	4.70536	3.26684	3.94079	4.03217	4.25204	4.43928	4.10232	4.34943	4.08887	4.51753	0.260046	4.16946	1.06259	0.314135	0.506702	-6.37223	NonSig	1	Single-promoter
127	ENSG00000023228	NDUFS1	chr2	206159478	-	FALSE	1	FB-PB.2944.2	3.63779	3.63779	4.52475	4.52475	Major	Major	3.55488	3.84972	3.66274	3.03005	4.09154	4.57732	4.27298	3.92276	5.09174	4.75895	3.55488	3.84972	3.66274	3.03005	4.09154	4.57732	4.27298	3.92276	5.09174	4.75895	0.886962	4.08127	3.41078	0.00711616	0.0438383	-2.81179	NonSig	1	Single-promoter
128	ENSG00000023318	ERP44	chr9	100099022	-	FALSE	1	FB-PB.5041.1	6.56553	6.56553	6.01285	6.01285	Major	Major	6.87632	6.75939	6.35325	6.47685	6.36183	5.47794	6.10725	6.28159	6.13761	6.05987	6.87632	6.75939	6.35325	6.47685	6.36183	5.47794	6.10725	6.28159	6.13761	6.05987	-0.552677	6.28919	-3.02961	0.0133623	0.0672922	-3.44919	NonSig	1	Single-promoter
130	ENSG00000023902	PLEKHO1	chr1	150150150	+	FALSE	1	FB-PB.326.1	3.02799	3.02799	3.52036	3.52036	Major	Major	3.31619	3.11553	2.6744	3.03005	3.00379	4.11587	3.68509	3.20184	3.54569	3.05334	3.31619	3.11553	2.6744	3.03005	3.00379	4.11587	3.68509	3.20184	3.54569	3.05334	0.492372	3.27418	2.29426	0.045888	0.148143	-4.66652	NonSig	1	Single-promoter
131	ENSG00000023909	GCLM	chr1	93909399	-	FALSE	1	FB-PB.242.1	2.80178	2.80178	3.14724	3.14724	Major	Major	3.85205	2.75493	2.19823	3.20045	2.00325	2.68841	3.26711	1.9936	3.40734	4.37975	3.85205	2.75493	2.19823	3.20045	2.00325	2.68841	3.26711	1.9936	3.40734	4.37975	0.345461	2.97451	0.713562	0.49259	0.668271	-6.68465	NonSig	1	Single-promoter
132	ENSG00000024422	EHD2	chr19	47713422	+	FALSE	1	FB-PB.2574.1,FB-PB.2574.2	6.44302	6.44302	6.72874	6.72874	Major	Major	6.54367	6.22486	6.57312	6.42621	6.44723	6.72197	6.91531	6.49935	6.86195	6.64515	6.54367	6.22486	6.57312	6.42621	6.44723	6.72197	6.91531	6.49935	6.86195	6.64515	0.285726	6.58588	2.30304	0.0452192	0.147278	-4.65237	NonSig	1	Single-promoter
133	ENSG00000024526	DEPDC1	chr1	68497082	-	FALSE	1	FB-PB.190.1	0	0	2.84316	2.84316	Inactive	Major	0	0	0	0	0	3.10843	2.67627	3.92276	1.64871	2.85963	0	0	0	0	0	3.10843	2.67627	3.92276	1.64871	2.85963	2.84316	1.42158	8.19401	1.28148e-05	0.000990887	3.70575	UpReg	1	Single-promoter
134	ENSG00000025293	PHF20	chr20	35772017	+	FALSE	1	FB-PB.3074.1	3.6235	3.6235	3.29601	3.29601	Major	Major	4.09833	3.64391	3.31801	3.35283	3.70444	2.91365	3.42029	2.63669	3.54569	3.96372	4.09833	3.64391	3.31801	3.35283	3.70444	2.91365	3.42029	2.63669	3.54569	3.96372	-0.327498	3.45976	-1.23253	0.247272	0.432892	-6.18493	NonSig	1	Single-promoter
135	ENSG00000025708	TYMP	chr22	50530025	-	FALSE	1	FB-PB.3287.1	3.0173	3.0173	3.72257	3.72257	Major	Major	2.45422	3.26684	3.94079	2.6136	2.81107	3.10843	3.80124	2.80004	4.67574	4.22742	2.45422	3.26684	3.94079	2.6136	2.81107	3.10843	3.80124	2.80004	4.67574	4.22742	0.705271	3.36994	1.7186	0.11791	0.268785	-5.54925	NonSig	1	Single-promoter
136	ENSG00000025796	SEC63	chr6	107958323	-	FALSE	1	FB-PB.4329.1,FB-PB.4329.2,FB-PB.4329.4,FB-PB.4329.5,FB-PB.4329.3,FB-PB.4329.6	6.42692	6.42692	6.35018	6.35018	Major	Major	6.52975	5.89386	6.73985	6.55749	6.41368	6.36964	6.48267	6.42619	6.22258	6.24981	6.52975	5.89386	6.73985	6.55749	6.41368	6.36964	6.48267	6.42619	6.22258	6.24981	-0.0767466	6.38855	-0.468518	0.649938	0.794527	-6.83737	NonSig	1	Single-promoter
137	ENSG00000025800	KPNA6	chr1	32108041	+	FALSE	1	FB-PB.89.1,FB-PB.89.2	4.74918	4.74918	5.5488	5.5488	Major	Major	3.9389	4.18988	4.97764	5.4258	5.21367	5.87597	5.31551	5.17161	5.41424	5.9667	3.9389	4.18988	4.97764	5.4258	5.21367	5.87597	5.31551	5.17161	5.41424	5.9667	0.799627	5.14899	2.53547	0.0306151	0.115115	-4.27304	NonSig	1	Single-promoter
138	ENSG00000026025	VIM	chr10	17229282	+	FALSE	1	FB-PB.585.1	11.789	23.8703	11.847	24.0081	Minor	Minor	11.7497	11.5465	11.9404	12.1613	11.5474	11.5123	11.9326	12.1553	11.8648	11.7699	23.7474	23.3184	24.1553	24.6698	23.4605	23.3639	24.165	24.5204	24.0065	23.9845	0.0579534	11.818	0.342961	0.739067	0.852164	-6.89217	NonSig	2	Multiple-promoter
139	ENSG00000026025	VIM	chr10	17230093	+	TRUE	2	FB-PB.585.2	12.0812	23.8703	12.1611	24.0081	NA	NA	11.9977	11.772	12.2149	12.5085	11.9131	11.8516	12.2323	12.365	12.1417	12.2147	23.7474	23.3184	24.1553	24.6698	23.4605	23.3639	24.165	24.5204	24.0065	23.9845	0.0798173	12.1212	0.480887	0.641437	0.789554	-6.83109	NonSig	2	Multiple-promoter
140	ENSG00000026508	CD44	chr11	35139174	+	FALSE	1	FB-PB.895.1,FB-PB.895.2	10.6052	10.6052	9.72441	9.72441	Major	Major	10.8585	10.5969	10.1211	11.056	10.3934	9.75975	9.9385	9.55562	10.0267	9.34148	10.8585	10.5969	10.1211	11.056	10.3934	9.75975	9.9385	9.55562	10.0267	9.34148	-0.880758	10.1648	-4.21697	0.00197722	0.0191751	-1.49808	NonSig	1	Single-promoter
142	ENSG00000027697	IFNGR1	chr6	137219408	-	FALSE	1	FB-PB.4374.1	6.68562	6.68562	6.04995	6.04995	Major	Major	6.76187	6.34878	6.87832	6.73441	6.70473	6.12142	5.72146	5.97459	6.24306	6.18924	6.76187	6.34878	6.87832	6.73441	6.70473	6.12142	5.72146	5.97459	6.24306	6.18924	-0.63567	6.36779	-4.32784	0.00166899	0.0175783	-1.32306	NonSig	1	Single-promoter
143	ENSG00000028116	VRK2	chr2	58046631	+	FALSE	1	FB-PB.2716.1,FB-PB.2716.2	3.56568	3.56568	4.23071	4.23071	Major	Major	2.6727	3.84972	3.55673	3.35283	4.39645	4.02226	4.00877	4.05806	4.61418	4.45028	2.6727	3.84972	3.55673	3.35283	4.39645	4.02226	4.00877	4.05806	4.61418	4.45028	0.665028	3.8982	2.23484	0.0506752	0.15884	-4.76188	NonSig	1	Single-promoter
144	ENSG00000028137	TNFRSF1B	chr1	12166985	+	FALSE	1	FB-PB.35.2,FB-PB.35.1,FB-PB.35.3	4.57973	4.57973	4.26115	4.26115	Major	Major	4.89108	2.94647	4.43547	5.86659	4.75906	4.50995	4.68948	3.69256	4.54987	3.8639	4.89108	2.94647	4.43547	5.86659	4.75906	4.50995	4.68948	3.69256	4.54987	3.8639	-0.318583	4.42044	-0.665551	0.521468	0.692111	-6.71916	NonSig	1	Single-promoter
145	ENSG00000028203	VEZT	chr12	95217806	+	FALSE	1	FB-PB.1286.1,FB-PB.1286.3	3.93291	3.93291	3.65664	3.65664	Major	Major	4.24189	4.18988	3.94079	3.20045	4.09154	4.02226	3.09572	4.12123	2.66422	4.37975	4.24189	4.18988	3.94079	3.20045	4.09154	4.02226	3.09572	4.12123	2.66422	4.37975	-0.276271	3.79477	-0.769292	0.460348	0.641602	-6.64189	NonSig	1	Single-promoter
146	ENSG00000028277	POU2F2	chr19	42132440	-	FALSE	1	FB-PB.2554.1	1.0783	1.0783	0.485897	0.485897	Major	Major	1.48133	0	1.88435	2.0258	0	0	0	0.803701	0	1.62578	1.48133	0	1.88435	2.0258	0	0	0	0.803701	0	1.62578	-0.592399	0.782096	-1.15028	0.278054	0.468765	-6.27819	NonSig	1	Single-promoter
147	ENSG00000029363	BCLAF1	chr6	136289846	-	FALSE	1	FB-PB.4372.1,FB-PB.4372.2,FB-PB.4372.4,FB-PB.4372.3	5.80753	5.80753	6.244	6.244	Major	Major	5.48882	5.66776	5.84622	5.96448	6.07036	6.02819	6.23667	6.60257	5.67766	6.67491	5.48882	5.66776	5.84622	5.96448	6.07036	6.02819	6.23667	6.60257	5.67766	6.67491	0.436473	6.02576	2.05292	0.0685331	0.192207	-5.04875	NonSig	1	Single-promoter
148	ENSG00000029364	SLC39A9	chr14	69398692	+	FALSE	1	FB-PB.1638.1,FB-PB.1638.2	5.67126	5.67126	6.01902	6.01902	Major	Major	5.99373	5.96199	5.89054	4.89111	5.61896	5.79338	6.29728	6.22519	5.76523	6.01404	5.99373	5.96199	5.89054	4.89111	5.61896	5.79338	6.29728	6.22519	5.76523	6.01404	0.347762	5.84514	1.51093	0.163206	0.33235	-5.83672	NonSig	1	Single-promoter
149	ENSG00000029725	RABEP1	chr17	5282285	+	FALSE	1	FB-PB.2093.1	5.54115	5.54115	5.2782	5.2782	Major	Major	6.35126	4.98495	5.8005	5.35537	5.21367	5.6125	5.59841	5.17161	5.09174	4.91673	6.35126	4.98495	5.8005	5.35537	5.21367	5.6125	5.59841	5.17161	5.09174	4.91673	-0.262953	5.40967	-0.971829	0.355138	0.54337	-6.46332	NonSig	1	Single-promoter
150	ENSG00000030066	NUP160	chr11	47848329	-	FALSE	1	FB-PB.916.1	4.03994	4.03994	4.45418	4.45418	Major	Major	3.66089	3.84972	4.55042	3.49064	4.64802	4.11587	4.19017	4.59173	4.61418	4.75895	3.66089	3.84972	4.55042	3.49064	4.64802	4.11587	4.19017	4.59173	4.61418	4.75895	0.414242	4.24706	1.59247	0.143842	0.303798	-5.72637	NonSig	1	Single-promoter
151	ENSG00000031698	SARS1	chr1	109213918	+	FALSE	1	FB-PB.262.1,FB-PB.262.2	3.02689	3.02689	3.02141	3.02141	Major	Major	2.45422	3.11553	1.88435	4.35453	3.32583	2.91365	2.90118	2.45245	3.08311	3.75666	2.45422	3.11553	1.88435	4.35453	3.32583	2.91365	2.90118	2.45245	3.08311	3.75666	-0.00548068	3.02415	-0.0125224	0.990267	1	-6.95609	NonSig	1	Single-promoter
152	ENSG00000031823	RANBP3	chr19	5978110	-	FALSE	1	FB-PB.2437.2,FB-PB.2437.1	4.37099	4.37099	4.80572	4.80572	Major	Major	3.44047	4.33395	4.2438	5.07766	4.75906	5.58002	4.4962	4.54641	4.25943	5.14651	3.44047	4.33395	4.2438	5.07766	4.75906	5.58002	4.4962	4.54641	4.25943	5.14651	0.434726	4.58835	1.24858	0.241597	0.427531	-6.16617	NonSig	1	Single-promoter
153	ENSG00000032444	PNPLA6	chr19	7535717	+	FALSE	1	FB-PB.2444.1	2.9822	2.9822	4.24616	4.24616	Major	Major	1.88288	3.11553	3.55673	3.03005	3.32583	4.43928	3.80124	4.29567	4.54987	4.14476	1.88288	3.11553	3.55673	3.03005	3.32583	4.43928	3.80124	4.29567	4.54987	4.14476	1.26396	3.61418	4.16406	0.00214505	0.0203988	-1.58215	UpReg	1	Single-promoter
154	ENSG00000032742	IFT88	chr13	20567138	+	FALSE	1	FB-PB.1401.1	1.67401	1.67401	2.45254	2.45254	Major	Major	0	0.969653	2.19823	2.6136	2.58858	2.68841	2.08243	3.20184	2.66422	1.62578	0	0.969653	2.19823	2.6136	2.58858	2.68841	2.08243	3.20184	2.66422	1.62578	0.778525	2.06327	1.44149	0.181464	0.355664	-5.92791	NonSig	1	Single-promoter
155	ENSG00000033050	ABCF2	chr7	151227213	-	FALSE	1	FB-PB.4692.1	3.88255	3.88255	5.07624	5.07624	Major	Major	4.37244	3.84972	3.66274	3.93892	3.58894	4.7033	4.68948	5.20114	5.30158	5.48568	4.37244	3.84972	3.66274	3.93892	3.58894	4.7033	4.68948	5.20114	5.30158	5.48568	1.19368	4.4794	5.60525	0.000268875	0.00572529	0.569536	UpReg	1	Single-promoter
156	ENSG00000033100	CHPF2	chr7	151232483	+	FALSE	1	FB-PB.4690.1,FB-PB.4690.2	4.7819	4.7819	5.52569	5.52569	Major	Major	4.89108	4.52623	4.89303	4.425	5.17414	5.51277	5.66125	5.73309	5.34012	5.38124	4.89108	4.52623	4.89303	4.425	5.17414	5.51277	5.66125	5.73309	5.34012	5.38124	0.743798	5.15379	4.44517	0.00139762	0.0157806	-1.1396	NonSig	1	Single-promoter
157	ENSG00000033170	FUT8	chr14	65412789	+	FALSE	1	FB-PB.1628.1	4.64255	4.64255	3.30636	3.30636	Major	Major	5.16773	3.84972	4.55042	5.31883	4.32605	3.57192	2.90118	3.69256	3.99538	2.37077	5.16773	3.84972	4.55042	5.31883	4.32605	3.57192	2.90118	3.69256	3.99538	2.37077	-1.33619	3.97446	-3.54667	0.00570321	0.0381095	-2.5862	DownReg	1	Single-promoter
158	ENSG00000033178	UBA6	chr4	67701148	-	FALSE	1	FB-PB.3734.2,FB-PB.3734.3	2.15462	2.15462	3.17652	3.17652	Major	Major	0.922984	1.95424	1.88435	3.20045	2.81107	3.28001	3.09572	3.20184	2.66422	3.6408	0.922984	1.95424	1.88435	3.20045	2.81107	3.28001	3.09572	3.20184	2.66422	3.6408	1.0219	2.66557	2.54951	0.0299004	0.114293	-4.24987	NonSig	1	Single-promoter
159	ENSG00000033627	ATP6V0A1	chr17	42458880	+	FALSE	1	FB-PB.2188.1,FB-PB.2188.2	4.83768	4.83768	3.57222	3.57222	Major	Major	5.7751	4.7988	4.2438	5.45977	3.91094	4.02226	2.40969	4.05806	3.40734	3.96372	5.7751	4.7988	4.2438	5.45977	3.91094	4.02226	2.40969	4.05806	3.40734	3.96372	-1.26547	4.20495	-2.87196	0.0173929	0.0805503	-3.7133	NonSig	1	Single-promoter
160	ENSG00000033800	PIAS1	chr15	68054294	+	FALSE	1	FB-PB.1825.1,FB-PB.1825.2	5.43205	5.43205	5.29164	5.29164	Major	Major	4.75408	5.4319	5.65394	5.58816	5.73217	4.9264	5.3916	5.39254	5.26198	5.48568	4.75408	5.4319	5.65394	5.58816	5.73217	4.9264	5.3916	5.39254	5.26198	5.48568	-0.140411	5.36185	-0.687243	0.508296	0.680856	-6.70384	NonSig	1	Single-promoter
161	ENSG00000034152	MAP2K3	chr17	21284711	+	FALSE	1	FB-PB.2132.1	6.79311	6.79311	6.30164	6.30164	Major	Major	6.94088	7.22446	5.75328	7.10013	6.94681	6.42556	6.48267	6.38817	6.39722	5.81459	6.94088	7.22446	5.75328	7.10013	6.94681	6.42556	6.48267	6.38817	6.39722	5.81459	-0.491472	6.54738	-1.74615	0.112843	0.262491	-5.50961	NonSig	1	Single-promoter
162	ENSG00000034677	RNF19A	chr8	100309996	-	FALSE	1	FB-PB.4863.1	5.83426	5.83426	5.02868	5.02868	Major	Major	6.48715	5.36638	5.75328	5.91636	5.64811	4.9264	5.59841	4.45128	4.89868	5.26865	6.48715	5.36638	5.75328	5.91636	5.64811	4.9264	5.59841	4.45128	4.89868	5.26865	-0.805571	5.43147	-3.0944	0.0119955	0.0626278	-3.34061	NonSig	1	Single-promoter
163	ENSG00000034693	PEX3	chr6	143450809	+	FALSE	1	FB-PB.4380.1	4.28313	4.28313	4.53942	4.53942	Major	Major	2.8624	5.33246	4.84879	4.28044	4.09154	4.20377	3.80124	4.49963	5.17937	5.01308	2.8624	5.33246	4.84879	4.28044	4.09154	4.20377	3.80124	4.49963	5.17937	5.01308	0.25629	4.41127	0.56253	0.586733	0.743932	-6.78576	NonSig	1	Single-promoter
164	ENSG00000035403	VCL	chr10	73998116	+	FALSE	1	FB-PB.683.4,FB-PB.683.3,FB-PB.683.2	8.20562	41.1765	8.55628	44.9411	Major	Major	8.77566	8.20095	8.03896	7.71361	8.29894	8.62279	8.75609	8.58581	8.5862	8.23052	41.8357	41.1402	41.6149	38.265	43.0266	44.7741	45.6228	46.1426	43.2704	44.8956	0.350657	8.38095	1.77019	0.108586	0.256617	-5.47476	NonSig	6	Multiple-promoter
165	ENSG00000035403	VCL	chr10	74083375	+	TRUE	2	FB-PB.683.5	6.79252	41.1765	7.47626	44.9411	NA	NA	6.63755	6.9615	6.86728	6.57309	6.92316	7.50627	7.50058	7.77286	7.2838	7.3178	41.8357	41.1402	41.6149	38.265	43.0266	44.7741	45.6228	46.1426	43.2704	44.8956	0.683746	7.13439	4.95053	0.00066563	0.00991612	-0.371085	NonSig	6	Multiple-promoter
166	ENSG00000035403	VCL	chr10	74095810	+	TRUE	3	FB-PB.683.6	5.89175	41.1765	6.89628	44.9411	NA	NA	5.79852	5.79772	5.97528	5.52539	6.36183	6.95513	6.79437	6.98871	6.50292	7.2403	41.8357	41.1402	41.6149	38.265	43.0266	44.7741	45.6228	46.1426	43.2704	44.8956	1.00454	6.39402	5.30465	0.000404593	0.00727153	0.145483	UpReg	6	Multiple-promoter
167	ENSG00000035403	VCL	chr10	74103895	+	TRUE	4	FB-PB.683.7	7.0107	41.1765	7.77184	44.9411	NA	NA	7.23494	6.97256	7.2455	6.6189	6.98158	7.53197	7.90932	8.05758	7.35139	8.00893	41.8357	41.1402	41.6149	38.265	43.0266	44.7741	45.6228	46.1426	43.2704	44.8956	0.761143	7.39127	4.07427	0.00246529	0.0224628	-1.72561	NonSig	6	Multiple-promoter
168	ENSG00000035403	VCL	chr10	74109112	+	TRUE	5	FB-PB.683.8	6.70415	41.1765	7.14544	44.9411	NA	NA	6.83162	6.6535	6.98436	5.73408	7.31719	7.24136	7.38434	7.2583	6.79416	7.04902	41.8357	41.1402	41.6149	38.265	43.0266	44.7741	45.6228	46.1426	43.2704	44.8956	0.441285	6.92479	1.60351	0.141383	0.300563	-5.71116	NonSig	6	Multiple-promoter
169	ENSG00000035403	VCL	chr10	74114263	+	TRUE	6	FB-PB.683.9	6.57174	41.1765	7.095	44.9411	NA	NA	6.55746	6.554	6.50349	6.09988	7.14386	6.91662	7.27809	7.47935	6.75191	7.04902	41.8357	41.1402	41.6149	38.265	43.0266	44.7741	45.6228	46.1426	43.2704	44.8956	0.523259	6.83337	2.4725	0.034033	0.122572	-4.37659	NonSig	6	Multiple-promoter
171	ENSG00000035681	NSMAF	chr8	58659828	-	FALSE	1	FB-PB.4805.1	4.79078	4.79078	4.50709	4.50709	Major	Major	5.51733	4.26371	4.93595	4.84044	4.39645	4.76239	4.91249	4.49963	4.84609	3.51481	5.51733	4.26371	4.93595	4.84044	4.39645	4.76239	4.91249	4.49963	4.84609	3.51481	-0.28369	4.64893	-0.87721	0.401929	0.589103	-6.55114	NonSig	1	Single-promoter
173	ENSG00000035862	TIMP2	chr17	78870995	-	TRUE	3	FB-PB.2295.2	9.92848	29.9711	8.95832	27.3092	NA	NA	9.66358	9.7795	10.0037	10.0841	10.1115	8.6188	9.2911	8.9081	9.26186	8.71171	29.3868	29.375	30.1754	30.4726	30.446	26.4656	28.2746	26.7383	28.2851	26.7824	-0.970165	9.4434	-5.59423	0.000272875	0.00577904	0.554217	NonSig	3	Multiple-promoter
174	ENSG00000035862	TIMP2	chr17	78873921	-	TRUE	2	FB-PB.2295.1	10.1686	29.9711	9.3839	27.3092	NA	NA	10.0079	10.0075	10.1769	10.3346	10.3161	9.14264	9.71238	9.23881	9.66434	9.16136	29.3868	29.375	30.1754	30.4726	30.446	26.4656	28.2746	26.7383	28.2851	26.7824	-0.784706	9.77626	-4.96189	0.000654902	0.00983106	-0.354231	NonSig	3	Multiple-promoter
175	ENSG00000035862	TIMP2	chr17	78925133	-	FALSE	1	FB-PB.2295.4	9.87405	29.9711	8.96697	27.3092	Minor	Minor	9.71525	9.58799	9.9948	10.0539	10.0184	8.70416	9.2711	8.59139	9.3589	8.9093	29.3868	29.375	30.1754	30.4726	30.446	26.4656	28.2746	26.7383	28.2851	26.7824	-0.907078	9.42051	-4.90871	0.000706788	0.0102184	-0.433309	NonSig	3	Multiple-promoter
176	ENSG00000035928	RFC1	chr4	39366370	-	FALSE	1	FB-PB.3701.1	3.99829	3.99829	4.20538	4.20538	Major	Major	4.37244	2.75493	4.43547	4.03217	4.39645	3.92216	4.19017	4.18175	4.67574	4.05708	4.37244	2.75493	4.43547	4.03217	4.39645	3.92216	4.19017	4.18175	4.67574	4.05708	0.207088	4.10184	0.634378	0.540751	0.709057	-6.7404	NonSig	1	Single-promoter
177	ENSG00000036054	TBC1D23	chr3	100260995	+	FALSE	1	FB-PB.3463.1,FB-PB.3463.2,FB-PB.3463.3	5.63008	5.63008	6.42173	6.42173	Major	Major	5.13131	5.33246	5.40174	6.37373	5.91115	6.46166	6.01403	6.67804	5.76523	7.18966	5.13131	5.33246	5.40174	6.37373	5.91115	6.46166	6.01403	6.67804	5.76523	7.18966	0.791647	6.0259	2.46681	0.0343599	0.123055	-4.38593	NonSig	1	Single-promoter
178	ENSG00000036549	ZZZ3	chr1	77682658	-	FALSE	2	FB-PB.201.1	0	4.0434	0	4.11659	Inactive	Inactive	0	0	0	0	0	0	0	0	0	0	3.66089	4.18988	4.43547	3.83923	4.09154	3.81459	4.27298	4.34943	4.08887	4.05708	0	0	0	1	1	-6.95617	NonSig	2	Multiple-promoter
179	ENSG00000036549	ZZZ3	chr1	77683450	-	FALSE	1	FB-PB.201.2,FB-PB.201.3	4.0434	4.0434	4.11659	4.11659	Major	Major	3.66089	4.18988	4.43547	3.83923	4.09154	3.81459	4.27298	4.34943	4.08887	4.05708	3.66089	4.18988	4.43547	3.83923	4.09154	3.81459	4.27298	4.34943	4.08887	4.05708	0.073189	4.07999	0.421314	0.682863	0.815186	-6.85989	NonSig	2	Multiple-promoter
180	ENSG00000037474	NSUN2	chr5	6633066	-	FALSE	1	FB-PB.3899.1,FB-PB.3899.2	4.78501	4.78501	5.39189	5.39189	Major	Major	3.18019	5.87042	4.65688	5.35537	4.86217	5.73557	5.3916	5.17161	4.84609	5.81459	3.18019	5.87042	4.65688	5.35537	4.86217	5.73557	5.3916	5.17161	4.84609	5.81459	0.606884	5.08845	1.33541	0.212739	0.393933	-6.06181	NonSig	1	Single-promoter
181	ENSG00000037749	MFAP3	chr5	154038945	+	FALSE	1	FB-PB.4147.1,FB-PB.4147.2	2.52594	2.52594	2.89097	2.89097	Major	Major	4.43354	2.27306	3.31801	1.01725	1.58785	3.57192	2.90118	2.94676	2.66422	2.37077	4.43354	2.27306	3.31801	1.01725	1.58785	3.57192	2.90118	2.94676	2.66422	2.37077	0.365029	2.70846	0.612977	0.554226	0.720457	-6.75444	NonSig	1	Single-promoter
182	ENSG00000037965	HOXC8	chr12	54008989	+	FALSE	1	FB-PB.1191.1,FB-PB.1191.3,FB-PB.1191.2	4.38599	4.38599	4.16713	4.16713	Major	Major	3.31619	4.11206	5.46172	4.78793	4.25204	4.43928	4.27298	4.34943	4.54987	3.2241	3.31619	4.11206	5.46172	4.78793	4.25204	4.43928	4.27298	4.34943	4.54987	3.2241	-0.218856	4.27656	-0.541806	0.60038	0.754854	-6.7979	NonSig	1	Single-promoter
183	ENSG00000038210	PI4K2B	chr4	25234010	+	FALSE	1	FB-PB.3690.1	1.59115	1.59115	2.59185	2.59185	Major	Major	0	2.94647	2.19823	0	2.81107	2.42137	2.90118	1.69453	2.88882	3.05334	0	2.94647	2.19823	0	2.81107	2.42137	2.90118	1.69453	2.88882	3.05334	1.0007	2.0915	1.53236	0.157906	0.324424	-5.80806	NonSig	1	Single-promoter
184	ENSG00000038358	EDC4	chr16	67873069	+	FALSE	1	FB-PB.2013.1	3.54139	3.54139	3.88384	3.88384	Major	Major	3.66089	3.75048	3.0318	3.35283	3.91094	4.11587	3.80124	3.85003	3.8954	3.75666	3.66089	3.75048	3.0318	3.35283	3.91094	4.11587	3.80124	3.85003	3.8954	3.75666	0.342453	3.71261	1.93376	0.0833352	0.219574	-5.23164	NonSig	1	Single-promoter
185	ENSG00000038532	CLEC16A	chr16	10944559	+	FALSE	1	FB-PB.1914.1	4.90426	4.90426	4.70091	4.70091	Major	Major	4.09833	5.74713	5.23989	4.78793	4.64802	4.76239	4.85989	4.18175	4.73479	4.96571	4.09833	5.74713	5.23989	4.78793	4.64802	4.76239	4.85989	4.18175	4.73479	4.96571	-0.203351	4.80258	-0.68496	0.509672	0.681767	-6.70547	NonSig	1	Single-promoter
186	ENSG00000039123	MTREX	chr5	55307986	+	FALSE	1	FB-PB.3957.1,FB-PB.3957.2	4.70384	4.70384	4.92325	4.92325	Major	Major	3.66089	5.82236	4.31056	4.67679	5.0486	4.87378	4.4962	5.14145	5.09174	5.01308	3.66089	5.82236	4.31056	4.67679	5.0486	4.87378	4.4962	5.14145	5.09174	5.01308	0.21941	4.81354	0.612272	0.554673	0.720799	-6.75489	NonSig	1	Single-promoter
188	ENSG00000039523	RIPOR1	chr16	67528814	+	FALSE	1	FB-PB.2009.1	2.71202	2.71202	2.40949	2.40949	Major	Major	3.03003	2.27306	3.31801	2.6136	2.3254	3.69835	1.05547	1.9936	2.66422	2.63581	3.03003	2.27306	3.31801	2.6136	2.3254	3.69835	1.05547	1.9936	2.66422	2.63581	-0.302527	2.56076	-0.675405	0.515459	0.687162	-6.71226	NonSig	1	Single-promoter
189	ENSG00000039560	RAI14	chr5	34656256	+	FALSE	1	FB-PB.3916.1,FB-PB.3916.2,FB-PB.3916.3,FB-PB.3916.4,FB-PB.3916.6	2.63182	7.07902	3.56361	9.87981	Minor	Minor	3.18019	3.11553	0.923938	2.6136	3.32583	2.91365	3.42029	4.18175	3.54569	3.75666	6.93982	7.96316	5.02417	6.81593	8.65199	9.10125	9.41005	10.8598	9.76826	10.2597	0.93179	3.09771	2.03965	0.070049	0.194785	-5.06934	NonSig	2	Multiple-promoter
190	ENSG00000039560	RAI14	chr5	34823338	+	TRUE	2	FB-PB.3916.7	4.4472	7.07902	6.31621	9.87981	NA	NA	3.75963	4.84763	4.10024	4.20234	5.32616	6.1876	5.98975	6.67804	6.22258	6.50306	6.93982	7.96316	5.02417	6.81593	8.65199	9.10125	9.41005	10.8598	9.76826	10.2597	1.86901	5.3817	6.35304	0.000102653	0.00306398	1.5675	UpReg	2	Multiple-promoter
191	ENSG00000040341	STAU2	chr8	73746889	-	FALSE	1	FB-PB.4824.1,FB-PB.4824.2	3.24591	3.24591	3.78228	3.78228	Major	Major	2.6727	3.75048	2.86414	3.61643	3.32583	3.57192	3.55876	3.992	4.41194	3.37677	2.6727	3.75048	2.86414	3.61643	3.32583	3.57192	3.55876	3.992	4.41194	3.37677	0.536362	3.5141	1.97892	0.0774016	0.209144	-5.16286	NonSig	1	Single-promoter
192	ENSG00000041357	PSMA4	chr15	78540440	+	FALSE	1	FB-PB.1849.1	6.19904	6.19904	6.96125	6.96125	Major	Major	5.39977	6.12934	6.43032	6.58852	6.44723	6.89037	6.73719	7.55565	6.58544	7.03761	5.39977	6.12934	6.43032	6.58852	6.44723	6.89037	6.73719	7.55565	6.58544	7.03761	0.762216	6.58014	2.90103	0.0165661	0.0779181	-3.66464	NonSig	1	Single-promoter
193	ENSG00000041802	LSG1	chr3	194672191	-	FALSE	1	FB-PB.3645.1,FB-PB.3645.2,FB-PB.3645.3	4.68523	4.68523	4.73756	4.73756	Major	Major	3.66089	5.11032	5.09591	5.16261	4.39645	4.9264	4.68948	4.59173	4.61418	4.86603	3.66089	5.11032	5.09591	5.16261	4.39645	4.9264	4.68948	4.59173	4.61418	4.86603	0.0523285	4.7114	0.181553	0.859734	0.932568	-6.93816	NonSig	1	Single-promoter
194	ENSG00000041982	TNC	chr9	115118216	-	FALSE	1	FB-PB.5078.1	5.60982	5.60982	8.68327	8.68327	Major	Major	5.82156	4.98495	6.25497	5.55712	5.4305	8.38967	8.63999	8.94567	8.55377	8.88722	5.82156	4.98495	6.25497	5.55712	5.4305	8.38967	8.63999	8.94567	8.55377	8.88722	3.07345	7.14654	13.2566	1.84724e-07	9.75197e-05	7.87398	UpReg	1	Single-promoter
196	ENSG00000042286	AIFM2	chr10	70132825	-	FALSE	1	FB-PB.664.1	2.5831	2.5831	1.63656	1.63656	Major	Major	3.03003	2.27306	2.6744	2.34943	2.58858	2.09343	1.05547	0	2.3981	2.63581	3.03003	2.27306	2.6744	2.34943	2.58858	2.09343	1.05547	0	2.3981	2.63581	-0.946537	2.10983	-1.99973	0.0748029	0.205524	-5.13093	NonSig	1	Single-promoter
197	ENSG00000042429	MED17	chr11	93784290	+	FALSE	1	FB-PB.1003.1,FB-PB.1003.2	3.1569	3.1569	2.82745	2.82745	Major	Major	3.03003	3.94257	3.31801	3.49064	2.00325	1.6683	2.67627	3.31424	3.25432	3.2241	3.03003	3.94257	3.31801	3.49064	2.00325	1.6683	2.67627	3.31424	3.25432	3.2241	-0.329454	2.99217	-0.782689	0.452806	0.635714	-6.63119	NonSig	1	Single-promoter
198	ENSG00000042445	RETSAT	chr2	85354533	-	FALSE	1	FB-PB.2759.1	5.4862	5.4862	4.60763	4.60763	Major	Major	5.62602	5.46358	5.33916	5.78855	5.21367	4.87378	4.80529	4.7197	4.41194	4.22742	5.62602	5.46358	5.33916	5.78855	5.21367	4.87378	4.80529	4.7197	4.41194	4.22742	-0.878571	5.04691	-5.15511	0.000498157	0.00841285	-0.0704057	NonSig	1	Single-promoter
199	ENSG00000043093	DCUN1D1	chr3	182980514	-	FALSE	1	FB-PB.3618.1,FB-PB.3618.2	3.91663	3.91663	4.56462	4.56462	Major	Major	4.65494	3.40377	3.31801	4.20234	4.00406	4.57732	4.62789	4.23984	4.73479	4.64328	4.65494	3.40377	3.31801	4.20234	4.00406	4.57732	4.62789	4.23984	4.73479	4.64328	0.647999	4.24062	2.51694	0.0315837	0.117294	-4.30356	NonSig	1	Single-promoter
200	ENSG00000044090	CUL7	chr6	43053866	-	FALSE	1	FB-PB.4254.1	3.24735	3.24735	3.63166	3.63166	Major	Major	3.03003	2.94647	3.31801	3.61643	3.32583	3.10843	4.00877	3.92276	4.48255	2.63581	3.03003	2.94647	3.31801	3.61643	3.32583	3.10843	4.00877	3.92276	4.48255	2.63581	0.384311	3.43951	1.14598	0.279742	0.469794	-6.28293	NonSig	1	Single-promoter
201	ENSG00000044115	CTNNA1	chr5	138753446	+	FALSE	1	FB-PB.4108.1,FB-PB.4108.2	6.38533	6.38533	6.666	6.666	Major	Major	6.85415	6.27928	6.09374	6.39143	6.30806	6.40716	6.76606	6.80852	6.5198	6.82844	6.85415	6.27928	6.09374	6.39143	6.30806	6.40716	6.76606	6.80852	6.5198	6.82844	0.280665	6.52566	1.7038	0.120715	0.272758	-5.5704	NonSig	1	Single-promoter
202	ENSG00000044574	HSPA5	chr9	125241343	-	FALSE	1	FB-PB.5100.1	7.93967	7.93967	8.11925	8.11925	Major	Major	7.88665	8.15318	7.75122	8.12163	7.78568	8.06531	8.03327	8.43235	7.97686	8.08848	7.88665	8.15318	7.75122	8.12163	7.78568	8.06531	8.03327	8.43235	7.97686	8.08848	0.179581	8.02946	1.30699	0.221851	0.404284	-6.09651	NonSig	1	Single-promoter
203	ENSG00000046647	GEMIN8	chrX	14029916	-	FALSE	1	FB-PB.5255.1	3.82275	3.82275	3.17736	3.17736	Major	Major	4.02082	3.52883	4.02271	2.8368	4.70461	3.43334	3.42029	3.31424	3.08311	2.63581	4.02082	3.52883	4.02271	2.8368	4.70461	3.43334	3.42029	3.31424	3.08311	2.63581	-0.645395	3.50006	-1.97712	0.0776302	0.209329	-5.16561	NonSig	1	Single-promoter
204	ENSG00000046653	GPM6B	chrX	13938852	-	FALSE	1	FB-PB.5249.1,FB-PB.5249.6,FB-PB.5249.5,FB-PB.5249.3,FB-PB.5249.2	4.13425	4.13425	3.83305	3.83305	Major	Major	3.75963	4.52623	4.70731	3.03005	4.64802	3.92216	4.35129	3.77344	4.48255	2.63581	3.75963	4.52623	4.70731	3.03005	4.64802	3.92216	4.35129	3.77344	4.48255	2.63581	-0.301196	3.98365	-0.699489	0.50095	0.674244	-6.69499	NonSig	1	Single-promoter
205	ENSG00000047188	YTHDC2	chr5	113513705	+	FALSE	1	FB-PB.4055.1	3.77672	3.77672	3.21808	3.21808	Major	Major	2.45422	3.64391	4.65688	3.73212	4.39645	3.10843	1.65846	3.92276	4.17667	3.2241	2.45422	3.64391	4.65688	3.73212	4.39645	3.10843	1.65846	3.92276	4.17667	3.2241	-0.558633	3.4974	-1.03342	0.3269	0.517992	-6.40221	NonSig	1	Single-promoter
206	ENSG00000047315	POLR2B	chr4	56978883	+	FALSE	1	FB-PB.3732.1	6.37234	6.37234	6.74738	6.74738	Major	Major	5.82156	6.50917	6.39999	6.6189	6.51208	6.79454	6.15169	6.82759	6.79416	7.1689	5.82156	6.50917	6.39999	6.6189	6.51208	6.79454	6.15169	6.82759	6.79416	7.1689	0.375035	6.55986	1.72548	0.116624	0.266982	-5.53937	NonSig	1	Single-promoter
207	ENSG00000047621	FERRY3	chr12	4538508	-	TRUE	1	FB-PB.1095.1,FB-PB.1095.2	4.50006	4.50006	5.36437	5.36437	NA	NA	4.43354	4.58502	4.55042	4.11976	4.81154	5.28991	5.63017	5.25847	5.41424	5.22907	4.43354	4.58502	4.55042	4.11976	4.81154	5.28991	5.63017	5.25847	5.41424	5.22907	0.864318	4.93221	5.72283	0.000229948	0.00500941	0.731788	NonSig	1	Single-promoter
208	ENSG00000047634	SCML1	chrX	17737488	+	FALSE	1	FB-PB.5254.1,FB-PB.5254.2	2.1506	2.1506	0.78337	0.78337	Major	Major	0	3.40377	2.6744	2.34943	2.3254	0	2.08243	0.803701	0	1.03072	0	3.40377	2.6744	2.34943	2.3254	0	2.08243	0.803701	0	1.03072	-1.36723	1.46698	-2.14396	0.0589485	0.174685	-4.90622	NonSig	1	Single-promoter
209	ENSG00000047849	MAP4	chr3	48088891	-	FALSE	1	FB-PB.3394.1,FB-PB.3394.2,FB-PB.3394.3	7.92526	7.92526	8.15635	8.15635	Major	Major	8.02211	7.82156	8.00409	7.93502	7.84352	8.12844	8.16919	8.04948	8.37971	8.05492	8.02211	7.82156	8.00409	7.93502	7.84352	8.12844	8.16919	8.04948	8.37971	8.05492	0.231089	8.04081	2.11182	0.062175	0.181262	-4.95679	NonSig	1	Single-promoter
210	ENSG00000048052	HDAC9	chr7	18509277	+	FALSE	1	FB-PB.4456.1	0.390847	0.390847	1.87586	1.87586	Major	Major	0	1.95424	0	0	0	0	3.09572	1.9936	2.66422	1.62578	0	1.95424	0	0	0	0	3.09572	1.9936	2.66422	1.62578	1.48502	1.13336	2.42518	0.0368484	0.128559	-4.45407	NonSig	1	Single-promoter
211	ENSG00000048140	TSPAN17	chr5	176647483	+	FALSE	1	FB-PB.4173.1	3.05821	3.05821	4.46839	4.46839	Major	Major	2.8624	2.94647	3.18199	2.8368	3.46337	4.20377	4.00877	4.63566	4.73479	4.75895	2.8624	2.94647	3.18199	2.8368	3.46337	4.20377	4.00877	4.63566	4.73479	4.75895	1.41018	3.7633	7.16411	3.91528e-05	0.00164947	2.56224	UpReg	1	Single-promoter
213	ENSG00000048342	CC2D2A	chr4	15479214	+	FALSE	1	FB-PB.3685.1	4.33822	4.33822	3.46291	3.46291	Major	Major	4.89108	4.40093	3.66274	3.73212	5.0042	4.28662	3.09572	3.77344	3.78798	2.37077	4.89108	4.40093	3.66274	3.73212	5.0042	4.28662	3.09572	3.77344	3.78798	2.37077	-0.875309	3.90056	-2.14651	0.0587001	0.174232	-4.90221	NonSig	1	Single-promoter
214	ENSG00000048405	ZNF800	chr7	127392708	-	FALSE	1	FB-PB.4635.1	5.28426	5.28426	4.65048	4.65048	Major	Major	4.934	5.984	5.09591	5.64831	4.75906	5.32953	4.4962	5.2863	4.17667	3.96372	4.934	5.984	5.09591	5.64831	4.75906	5.32953	4.4962	5.2863	4.17667	3.96372	-0.633772	4.96737	-1.84241	0.0966684	0.240063	-5.36864	NonSig	1	Single-promoter
215	ENSG00000048471	SNX29	chr16	11976754	+	FALSE	1	FB-PB.1922.1	4.43523	4.43523	3.73882	3.73882	Major	Major	4.54849	4.74825	3.66274	4.35453	4.86217	3.81459	3.90873	3.77344	4.3377	2.85963	4.54849	4.74825	3.66274	4.35453	4.86217	3.81459	3.90873	3.77344	4.3377	2.85963	-0.696414	4.08703	-2.27024	0.0477675	0.152157	-4.70515	NonSig	1	Single-promoter
216	ENSG00000048544	MRPS10	chr6	42217865	-	FALSE	1	FB-PB.4244.1	1.45535	1.45535	2.74452	2.74452	Major	Major	2.19665	0	1.88435	1.60792	1.58785	3.10843	2.40969	2.94676	2.3981	2.85963	2.19665	0	1.88435	1.60792	1.58785	3.10843	2.40969	2.94676	2.3981	2.85963	1.28917	2.09994	3.36911	0.00761884	0.0457831	-2.8812	UpReg	1	Single-promoter
217	ENSG00000048649	RSF1	chr11	77820741	-	FALSE	1	FB-PB.993.1	6.07406	6.07406	5.84121	5.84121	Major	Major	6.367	5.66776	5.8005	6.44329	6.09173	6.16587	6.03791	5.3404	5.82079	5.84108	6.367	5.66776	5.8005	6.44329	6.09173	6.16587	6.03791	5.3404	5.82079	5.84108	-0.232845	5.95763	-1.11621	0.291666	0.48442	-6.31541	NonSig	1	Single-promoter
218	ENSG00000048740	CELF2	chr10	11017892	+	FALSE	1	FB-PB.574.1,FB-PB.574.2,FB-PB.574.3,FB-PB.574.4	5.08533	9.26891	4.92058	8.40273	Major	Major	4.84684	5.06973	4.89303	5.52539	5.09167	4.87378	5.1501	4.7197	5.04584	4.81348	9.21929	9.59595	8.74696	9.36462	9.41772	9.23874	8.95134	7.92154	8.71776	7.18426	-0.164752	5.00296	-1.04732	0.320768	0.512542	-6.388	NonSig	2	Multiple-promoter
219	ENSG00000048740	CELF2	chr10	11165048	+	FALSE	2	FB-PB.574.5,FB-PB.574.6	4.18357	9.26891	3.48215	8.40273	Minor	Minor	4.37244	4.52623	3.85393	3.83923	4.32605	4.36497	3.80124	3.20184	3.67191	2.37077	9.21929	9.59595	8.74696	9.36462	9.41772	9.23874	8.95134	7.92154	8.71776	7.18426	-0.701427	3.83286	-2.04268	0.069699	0.193949	-5.06462	NonSig	2	Multiple-promoter
220	ENSG00000048828	FAM120A	chr9	93561189	+	FALSE	1	FB-PB.5025.1	5.55337	5.55337	6.09641	6.09641	Major	Major	5.33719	5.29773	5.33916	5.61855	6.1742	5.84896	6.25716	6.0084	6.13761	6.2299	5.33719	5.29773	5.33916	5.61855	6.1742	5.84896	6.25716	6.0084	6.13761	6.2299	0.543039	5.82489	2.89002	0.0168742	0.0790829	-3.68306	NonSig	1	Single-promoter
221	ENSG00000048991	R3HDM1	chr2	135531479	+	FALSE	1	FB-PB.2830.1	3.62921	3.62921	4.54953	4.54953	Major	Major	4.54849	3.11553	3.94079	2.8368	3.70444	4.9264	4.35129	4.75996	4.84609	3.8639	4.54849	3.11553	3.94079	2.8368	3.70444	4.9264	4.35129	4.75996	4.84609	3.8639	0.92032	4.08937	2.68411	0.0238435	0.0991305	-4.02683	NonSig	1	Single-promoter
222	ENSG00000049130	KITLG	chr12	88580471	-	FALSE	1	FB-PB.1273.1,FB-PB.1273.2	7.12633	7.12633	6.95301	6.95301	Major	Major	6.91968	6.66717	7.47383	7.26289	7.30809	6.61381	6.76606	7.33359	6.86195	7.18966	6.91968	6.66717	7.47383	7.26289	7.30809	6.61381	6.76606	7.33359	6.86195	7.18966	-0.173316	7.03967	-0.861521	0.410089	0.59641	-6.56497	NonSig	1	Single-promoter
223	ENSG00000049323	LTBP1	chr2	33134388	+	FALSE	1	FB-PB.2662.1,FB-PB.2662.2	2.08055	39.3845	0.418735	35.6181	Minor	Minor	3.18019	1.54436	2.6744	0	3.00379	1.06295	0	0	0	1.03072	39.7412	38.9085	40.2296	36.9087	41.1345	34.8136	34.8291	35.0461	36.4282	36.9732	-1.66181	1.24964	-2.77902	0.0203279	0.0898925	-3.86865	NonSig	6	Multiple-promoter
224	ENSG00000049323	LTBP1	chr2	33134518	+	TRUE	2	FB-PB.2662.3,FB-PB.2662.4,FB-PB.2662.9,FB-PB.2662.6,FB-PB.2662.7,FB-PB.2662.5,FB-PB.2662.10,FB-PB.2662.13,FB-PB.2662.14,FB-PB.2662.15,FB-PB.2662.12,FB-PB.2662.11,FB-PB.2662.16,FB-PB.2662.19,FB-PB.2662.18,FB-PB.2662.17	7.41494	39.3845	6.78217	35.6181	NA	NA	7.73714	7.16789	7.3444	7.24352	7.58174	6.56486	6.80832	6.60257	7.35139	6.58372	39.7412	38.9085	40.2296	36.9087	41.1345	34.8136	34.8291	35.0461	36.4282	36.9732	-0.632767	7.09856	-3.35046	0.00785557	0.046563	-2.91229	NonSig	6	Multiple-promoter
225	ENSG00000049323	LTBP1	chr2	33186871	+	TRUE	3	FB-PB.2662.20	7.64785	39.3845	7.33641	35.6181	NA	NA	7.22633	7.79068	7.71471	7.52596	7.9816	6.85008	7.32735	7.32019	7.56169	7.62273	39.7412	38.9085	40.2296	36.9087	41.1345	34.8136	34.8291	35.0461	36.4282	36.9732	-0.311446	7.49213	-1.62278	0.137181	0.294185	-5.68449	NonSig	6	Multiple-promoter
226	ENSG00000049323	LTBP1	chr2	33280038	+	TRUE	4	FB-PB.2662.22	7.6521	39.3845	7.26229	35.6181	NA	NA	7.28553	7.62546	7.8777	7.50171	7.9701	7.05304	7.08534	7.28614	7.47776	7.40917	39.7412	38.9085	40.2296	36.9087	41.1345	34.8136	34.8291	35.0461	36.4282	36.9732	-0.389811	7.45719	-2.39197	0.0389602	0.132736	-4.50823	NonSig	6	Multiple-promoter
227	ENSG00000049323	LTBP1	chr2	33301572	+	TRUE	5	FB-PB.2662.23	7.20443	39.3845	6.93192	35.6181	NA	NA	7.38168	7.27889	7.07356	7.27247	7.01553	6.53127	6.91531	6.87418	7.1492	7.18966	39.7412	38.9085	40.2296	36.9087	41.1345	34.8136	34.8291	35.0461	36.4282	36.9732	-0.272505	7.06818	-1.79094	0.105029	0.251856	-5.44448	NonSig	6	Multiple-promoter
228	ENSG00000049323	LTBP1	chr2	33309516	+	TRUE	6	FB-PB.2662.24	7.38463	39.3845	6.88653	35.6181	NA	NA	6.93032	7.50123	7.54488	7.365	7.58174	6.75143	6.69276	6.96307	6.88819	7.13718	39.7412	38.9085	40.2296	36.9087	41.1345	34.8136	34.8291	35.0461	36.4282	36.9732	-0.498105	7.13558	-3.16853	0.0106061	0.0572378	-3.21641	NonSig	6	Multiple-promoter
230	ENSG00000050130	JKAMP	chr14	59484516	+	FALSE	1	FB-PB.1614.1	2.86791	2.86791	4.04721	4.04721	Major	Major	0.922984	2.27306	3.94079	2.6136	4.58912	3.43334	4.62789	3.69256	4.17667	4.30559	0.922984	2.27306	3.94079	2.6136	4.58912	3.43334	4.62789	3.69256	4.17667	4.30559	1.1793	3.45756	1.87639	0.0914929	0.231869	-5.31804	NonSig	1	Single-promoter
231	ENSG00000050165	DKK3	chr11	12008616	-	TRUE	2	FB-PB.860.2	7.27124	10.5868	6.58654	9.22419	NA	NA	7.4424	7.35687	7.44441	7.49353	6.619	6.1876	6.86281	6.13624	7.07116	6.67491	11.202	10.1118	10.8867	11.5257	9.20758	7.25055	10.2831	9.21617	10.3255	9.04568	-0.684702	6.92889	-2.82343	0.0188677	0.0855597	-3.79447	NonSig	2	Multiple-promoter
232	ENSG00000050165	DKK3	chr11	12009338	-	FALSE	1	FB-PB.860.1	3.31552	10.5868	2.63765	9.22419	Minor	Minor	3.75963	2.75493	3.4423	4.03217	2.58858	1.06295	3.42029	3.07993	3.25432	2.37077	11.202	10.1118	10.8867	11.5257	9.20758	7.25055	10.2831	9.21617	10.3255	9.04568	-0.67787	2.97659	-1.41283	0.1895	0.364686	-5.96475	NonSig	2	Multiple-promoter
233	ENSG00000050405	LIMA1	chr12	50222646	-	TRUE	2	FB-PB.1179.1,FB-PB.1179.3,FB-PB.1179.4	7.62578	13.3614	7.65149	12.1993	NA	NA	7.73714	7.6043	7.41437	7.76884	7.60423	7.4976	7.73041	7.74806	7.56982	7.71156	13.4146	12.83	13.1434	13.6605	13.7582	12.2009	12.7427	11.9298	12.184	11.939	0.0257131	7.63863	0.226294	0.825749	0.912376	-6.92821	NonSig	2	Multiple-promoter
234	ENSG00000050405	LIMA1	chr12	50283546	-	FALSE	1	FB-PB.1179.2	5.73558	13.3614	4.54779	12.1993	Minor	Minor	5.67745	5.22566	5.72908	5.89169	6.15402	4.7033	5.01228	4.18175	4.61418	4.22742	13.4146	12.83	13.1434	13.6605	13.7582	12.2009	12.7427	11.9298	12.184	11.939	-1.18779	5.14168	-5.47136	0.000322045	0.00627747	0.382296	DownReg	2	Multiple-promoter
235	ENSG00000050820	BCAR1	chr16	75265981	-	FALSE	1	FB-PB.2042.1	3.01308	3.01308	3.199	3.199	Major	Major	4.09833	2.27306	3.85393	2.8368	2.00325	2.68841	3.26711	3.31424	3.67191	3.05334	4.09833	2.27306	3.85393	2.8368	2.00325	2.68841	3.26711	3.31424	3.67191	3.05334	0.185929	3.10604	0.443708	0.66715	0.805515	-6.84949	NonSig	1	Single-promoter
236	ENSG00000051009	FHIP1B	chr11	6234645	-	FALSE	1	FB-PB.832.1	4.19022	4.19022	3.92565	3.92565	Major	Major	3.18019	4.74825	4.49409	4.35453	4.17402	3.57192	3.68509	3.51577	4.54987	4.30559	3.18019	4.74825	4.49409	4.35453	4.17402	3.57192	3.68509	3.51577	4.54987	4.30559	-0.264568	4.05793	-0.814447	0.435253	0.618992	-6.60518	NonSig	1	Single-promoter
237	ENSG00000052723	SIKE1	chr1	114780663	-	FALSE	1	FB-PB.287.1	3.03502	3.03502	3.05612	3.05612	Major	Major	3.03003	3.52883	2.6744	3.61643	2.3254	2.68841	1.65846	3.92276	3.25432	3.75666	3.03003	3.52883	2.6744	3.61643	2.3254	2.68841	1.65846	3.92276	3.25432	3.75666	0.0211032	3.04557	0.0472053	0.963323	0.994808	-6.95495	NonSig	1	Single-promoter
238	ENSG00000052749	RRP12	chr10	97401340	-	FALSE	1	FB-PB.732.1	1.49665	1.49665	1.23526	1.23526	Major	Major	0	2.27306	1.88435	0	3.32583	1.6683	1.65846	0.803701	0	2.04584	0	2.27306	1.88435	0	3.32583	1.6683	1.65846	0.803701	0	2.04584	-0.261387	1.36595	-0.376458	0.714816	0.837957	-6.87916	NonSig	1	Single-promoter
240	ENSG00000052841	TTC17	chr11	43358936	+	FALSE	1	FB-PB.901.1,FB-PB.901.2	4.21667	4.21667	4.09337	4.09337	Major	Major	4.80121	3.64391	4.75603	4.55638	3.32583	4.28662	4.00877	3.85003	4.17667	4.14476	4.80121	3.64391	4.75603	4.55638	3.32583	4.28662	4.00877	3.85003	4.17667	4.14476	-0.123301	4.15502	-0.409392	0.691294	0.821342	-6.86521	NonSig	1	Single-promoter
241	ENSG00000053770	AP5M1	chr14	57268906	+	FALSE	1	FB-PB.1608.1,FB-PB.1608.2,FB-PB.1608.3	4.6011	4.6011	5.24573	5.24573	Major	Major	5.43007	4.33395	5.20522	4.03217	4.00406	5.24918	4.91249	5.3136	5.48474	5.26865	5.43007	4.33395	5.20522	4.03217	4.00406	5.24918	4.91249	5.3136	5.48474	5.26865	0.644636	4.92341	2.14333	0.05901	0.174685	-4.90722	NonSig	1	Single-promoter
242	ENSG00000054118	THRAP3	chr1	36224434	+	FALSE	1	FB-PB.114.5	5.19936	5.19936	5.86308	5.86308	Major	Major	5.09395	4.58502	5.23989	5.31883	5.75914	5.73557	5.42819	6.13624	5.70744	6.30795	5.09395	4.58502	5.23989	5.31883	5.75914	5.73557	5.42819	6.13624	5.70744	6.30795	0.663714	5.53122	2.73925	0.0217325	0.0933641	-3.93501	NonSig	1	Single-promoter
243	ENSG00000054267	ARID4B	chr1	235328168	-	FALSE	1	FB-PB.531.1	5.33515	5.33515	4.94405	4.94405	Major	Major	5.13131	5.89386	5.13327	5.12076	5.39655	4.76239	5.31551	4.54641	4.94942	5.14651	5.13131	5.89386	5.13327	5.12076	5.39655	4.76239	5.31551	4.54641	4.94942	5.14651	-0.391101	5.1396	-1.91533	0.0858791	0.224435	-5.25953	NonSig	1	Single-promoter
244	ENSG00000054523	KIF1B	chr1	10210568	+	FALSE	1	FB-PB.29.1,FB-PB.29.2,FB-PB.29.3	4.57211	4.57211	4.06186	4.06186	Major	Major	4.1719	4.26371	4.31056	5.20328	4.91108	3.69835	3.90873	4.40125	3.99538	4.30559	4.1719	4.26371	4.31056	5.20328	4.91108	3.69835	3.90873	4.40125	3.99538	4.30559	-0.510243	4.31698	-2.14321	0.0590218	0.174685	-4.90741	NonSig	1	Single-promoter
245	ENSG00000054983	GALC	chr14	87993182	-	FALSE	1	FB-PB.1672.1	4.94127	4.94127	4.76431	4.76431	Major	Major	4.70536	5.06973	5.60158	5.07766	4.25204	4.76239	4.00877	4.7197	4.94942	5.38124	4.70536	5.06973	5.60158	5.07766	4.25204	4.76239	4.00877	4.7197	4.94942	5.38124	-0.176968	4.85279	-0.586688	0.571038	0.732569	-6.77107	NonSig	1	Single-promoter
246	ENSG00000055044	NOP58	chr2	202265759	+	FALSE	1	FB-PB.2939.1	6.92222	6.92222	6.76349	6.76349	Major	Major	6.82023	7.27889	6.69057	7.02271	6.79871	6.79454	6.12964	7.39878	6.37883	7.11564	6.82023	7.27889	6.69057	7.02271	6.79871	6.79454	6.12964	7.39878	6.37883	7.11564	-0.158737	6.84285	-0.638259	0.538328	0.706826	-6.73781	NonSig	1	Single-promoter
247	ENSG00000055070	SZRD1	chr1	16367233	+	FALSE	1	FB-PB.43.1,FB-PB.43.2	4.96202	4.96202	5.61076	5.61076	Major	Major	4.6027	4.74825	4.43547	5.73408	5.28963	5.76476	5.53271	5.84959	5.67766	5.22907	4.6027	4.74825	4.43547	5.73408	5.28963	5.76476	5.53271	5.84959	5.67766	5.22907	0.648735	5.28639	2.52625	0.0310932	0.11614	-4.28823	NonSig	1	Single-promoter
248	ENSG00000055130	CUL1	chr7	148698869	+	FALSE	1	FB-PB.4684.1,FB-PB.4684.2,FB-PB.4684.3,FB-PB.4684.4	3.89267	3.89267	3.90643	3.90643	Major	Major	4.54849	4.0298	3.7615	4.11976	3.00379	3.69835	3.80124	3.992	4.17667	3.8639	4.54849	4.0298	3.7615	4.11976	3.00379	3.69835	3.80124	3.992	4.17667	3.8639	0.013763	3.89955	0.052733	0.959033	0.992155	-6.95465	NonSig	1	Single-promoter
249	ENSG00000055147	FAM114A2	chr5	154038914	-	FALSE	1	FB-PB.4146.1	2.52268	2.52268	2.89662	2.89662	Major	Major	0	2.75493	3.55673	3.49064	2.81107	2.68841	2.40969	3.60687	3.40734	2.37077	0	2.75493	3.55673	3.49064	2.81107	2.68841	2.40969	3.60687	3.40734	2.37077	0.373941	2.70965	0.577137	0.577215	0.735777	-6.77695	NonSig	1	Single-promoter
250	ENSG00000055163	CYFIP2	chr5	157266089	+	FALSE	1	FB-PB.4149.1	1.75017	1.75017	2.0127	2.0127	Major	Major	0	2.27306	2.86414	2.0258	1.58785	1.6683	2.67627	0	3.08311	2.63581	0	2.27306	2.86414	2.0258	1.58785	1.6683	2.67627	0	3.08311	2.63581	0.262527	1.88143	0.386444	0.707649	0.833855	-6.87505	NonSig	1	Single-promoter
251	ENSG00000055211	GINM1	chr6	149566399	+	FALSE	1	FB-PB.4395.1	6.34578	6.34578	5.8751	5.8751	Major	Major	6.84293	5.66776	6.55946	6.09988	6.55888	6.07556	5.53271	5.81179	6.34132	5.61413	6.84293	5.66776	6.55946	6.09988	6.55888	6.07556	5.53271	5.81179	6.34132	5.61413	-0.470677	6.11044	-1.8859	0.0900906	0.229502	-5.30379	NonSig	1	Single-promoter
252	ENSG00000055332	EIF2AK2	chr2	37157202	-	FALSE	1	FB-PB.2665.1	1.6512	1.6512	2.68768	2.68768	Major	Major	0	0	3.31801	2.34943	2.58858	2.42137	2.67627	2.45245	2.66422	3.2241	0	0	3.31801	2.34943	2.58858	2.42137	2.67627	2.45245	2.66422	3.2241	1.03648	2.16944	1.5853	0.145459	0.305724	-5.73621	NonSig	1	Single-promoter
253	ENSG00000055483	USP36	chr17	78840795	-	FALSE	1	FB-PB.2294.1	5.36512	5.36512	4.26157	4.26157	Major	Major	5.88855	4.98495	4.97764	5.64831	5.32616	4.50995	4.56355	4.18175	4.08887	3.96372	5.88855	4.98495	4.97764	5.64831	5.32616	4.50995	4.56355	4.18175	4.08887	3.96372	-1.10355	4.81334	-5.1192	0.000523932	0.00866146	-0.122751	DownReg	1	Single-promoter
254	ENSG00000055732	MCOLN3	chr1	85048494	-	FALSE	1	FB-PB.212.1	2.79696	2.79696	0.823474	0.823474	Major	Major	3.55488	2.53402	1.88435	3.20045	2.81107	0	0	0	2.07153	2.04584	3.55488	2.53402	1.88435	3.20045	2.81107	0	0	0	2.07153	2.04584	-1.97348	1.81021	-3.66705	0.00469577	0.033451	-2.38751	DownReg	1	Single-promoter
255	ENSG00000056097	ZFR	chr5	32444714	-	FALSE	1	FB-PB.3914.1,FB-PB.3914.2,FB-PB.3914.3,FB-PB.3914.5	5.28751	5.28751	5.02726	5.02726	Major	Major	5.43007	5.33246	4.93595	5.52539	5.21367	4.87378	5.01228	5.51521	5.09174	4.64328	5.43007	5.33246	4.93595	5.52539	5.21367	4.87378	5.01228	5.51521	5.09174	4.64328	-0.260253	5.15738	-1.41965	0.187558	0.362533	-5.95602	NonSig	1	Single-promoter
256	ENSG00000056972	TRAF3IP2	chr6	111605959	-	FALSE	1	FB-PB.4346.1	5.59096	5.59096	5.91857	5.91857	Major	Major	4.80121	5.93963	5.46172	5.94062	5.81161	5.79338	5.98975	6.12087	5.84779	5.84108	4.80121	5.93963	5.46172	5.94062	5.81161	5.79338	5.98975	6.12087	5.84779	5.84108	0.327616	5.75477	1.46927	0.173957	0.347381	-5.89175	NonSig	1	Single-promoter
258	ENSG00000057019	DCBLD2	chr3	98812452	-	TRUE	2	FB-PB.3458.1	5.50983	11.6359	6.97835	13.8855	NA	NA	5.05559	5.6947	5.46172	5.84104	5.49609	6.95513	7.33701	7.27229	6.22258	7.10475	11.8055	12.1732	11.3952	11.3982	11.4072	13.8455	14.4338	14.032	13.2233	13.8929	1.46852	6.24409	6.20541	0.000123419	0.00335804	1.37679	UpReg	2	Multiple-promoter
259	ENSG00000057019	DCBLD2	chr3	98901694	-	FALSE	1	FB-PB.3458.4,FB-PB.3458.5,FB-PB.3458.6,FB-PB.3458.7,FB-PB.3458.8,FB-PB.3458.11	6.12604	11.6359	6.90715	13.8855	Major	Minor	6.74991	6.47849	5.93353	5.55712	5.91115	6.89037	7.09675	6.75972	7.00073	6.78816	11.8055	12.1732	11.3952	11.3982	11.4072	13.8455	14.4338	14.032	13.2233	13.8929	0.781107	6.51659	3.50958	0.00605715	0.0396192	-2.64764	NonSig	2	Multiple-promoter
260	ENSG00000057252	SOAT1	chr1	179293771	+	FALSE	1	FB-PB.414.1,FB-PB.414.2,FB-PB.414.3,FB-PB.414.4,FB-PB.414.5	4.18735	4.18735	4.73199	4.73199	Major	Major	4.37244	3.94257	4.02271	4.425	4.17402	5.24918	4.35129	4.87439	4.73479	4.45028	4.37244	3.94257	4.02271	4.425	4.17402	5.24918	4.35129	4.87439	4.73479	4.45028	0.544638	4.45967	2.85147	0.0180007	0.0829725	-3.74758	NonSig	1	Single-promoter
261	ENSG00000057663	ATG5	chr6	106325630	-	FALSE	1	FB-PB.4327.1	4.25971	4.25971	4.21185	4.21185	Major	Major	5.13131	4.0298	4.49409	3.93892	3.70444	3.92216	3.90873	4.34943	4.17667	4.70228	5.13131	4.0298	4.49409	3.93892	3.70444	3.92216	3.90873	4.34943	4.17667	4.70228	-0.0478586	4.23578	-0.169759	0.868747	0.936898	-6.94042	NonSig	1	Single-promoter
262	ENSG00000057704	TMCC3	chr12	94650594	-	FALSE	1	FB-PB.1287.1,FB-PB.1287.2	2.33094	2.33094	1.44165	1.44165	Major	Major	3.03003	2.94647	2.6744	0	3.00379	2.09343	3.42029	1.69453	0	0	3.03003	2.94647	2.6744	0	3.00379	2.09343	3.42029	1.69453	0	0	-0.889287	1.88629	-1.09899	0.298741	0.490027	-6.33389	NonSig	1	Single-promoter
263	ENSG00000058056	USP13	chr3	179653073	+	FALSE	1	FB-PB.3613.1	4.56793	4.56793	5.24577	5.24577	Major	Major	4.54849	3.40377	4.84879	4.67679	5.36178	5.11957	5.01228	5.20114	5.70744	5.18838	4.54849	3.40377	4.84879	4.67679	5.36178	5.11957	5.01228	5.20114	5.70744	5.18838	0.67784	4.90685	2.07462	0.0661216	0.187889	-5.01498	NonSig	1	Single-promoter
264	ENSG00000058063	ATP11B	chr3	182793490	+	FALSE	1	FB-PB.3617.1	3.94463	3.94463	3.60561	3.60561	Major	Major	3.75963	3.94257	3.66274	4.03217	4.32605	3.92216	4.27298	3.20184	3.25432	3.37677	3.75963	3.94257	3.66274	4.03217	4.32605	3.92216	4.27298	3.20184	3.25432	3.37677	-0.33902	3.77512	-1.43485	0.183299	0.357474	-5.93648	NonSig	1	Single-promoter
265	ENSG00000058091	CDK14	chr7	90596423	+	FALSE	1	FB-PB.4565.5	5.29461	5.29461	5.8641	5.8641	Major	Major	4.30864	5.1498	5.77708	5.61855	5.61896	5.51277	5.46388	5.97459	6.02384	6.34544	4.30864	5.1498	5.77708	5.61855	5.61896	5.51277	5.46388	5.97459	6.02384	6.34544	0.569498	5.57936	1.88823	0.0897509	0.228935	-5.30031	NonSig	1	Single-promoter
266	ENSG00000058262	SEC61A1	chr3	128052440	+	FALSE	1	FB-PB.3518.1,FB-PB.3518.2	6.9146	6.9146	8.30398	8.30398	Major	Major	6.55746	6.6397	6.90017	7.29146	7.18421	8.57002	7.90932	8.43546	8.01309	8.59202	6.55746	6.6397	6.90017	7.29146	7.18421	8.57002	7.90932	8.43546	8.01309	8.59202	1.38938	7.60929	6.75295	6.31903e-05	0.00227137	2.06895	UpReg	1	Single-promoter
267	ENSG00000058600	POLR3E	chr16	22297423	+	FALSE	1	FB-PB.1947.1	5.27396	5.27396	4.75538	4.75538	Major	Major	5.48882	5.52492	4.49409	5.64831	5.21367	4.87378	4.56355	4.59173	4.73479	5.01308	5.48882	5.52492	4.49409	5.64831	5.21367	4.87378	4.56355	4.59173	4.73479	5.01308	-0.51858	5.01467	-2.32576	0.0435324	0.143328	-4.61569	NonSig	1	Single-promoter
268	ENSG00000058668	ATP2B4	chr1	203626800	+	FALSE	1	FB-PB.456.1,FB-PB.456.2,FB-PB.456.3,FB-PB.456.5,FB-PB.456.4,FB-PB.456.6	6.67117	13.1001	6.08802	12.2732	Major	Minor	6.85415	7.10901	6.86728	6.07817	6.44723	5.87597	5.86183	6.30898	5.97569	6.41763	12.9459	14.0925	13.4267	12.434	12.6013	11.456	11.9915	12.4755	12.2785	13.1644	-0.583148	6.3796	-2.70089	0.0231802	0.0974465	-3.99892	NonSig	2	Multiple-promoter
269	ENSG00000058668	ATP2B4	chr1	203700314	+	TRUE	2	FB-PB.456.7	6.42891	13.1001	6.18514	12.2732	NA	NA	6.09175	6.98352	6.55946	6.3558	6.15402	5.58002	6.12964	6.1665	6.30282	6.74673	12.9459	14.0925	13.4267	12.434	12.6013	11.456	11.9915	12.4755	12.2785	13.1644	-0.243769	6.30703	-1.00675	0.338914	0.529662	-6.42904	NonSig	2	Multiple-promoter
271	ENSG00000058673	ZC3H11A	chr1	203795636	+	FALSE	1	FB-PB.459.1	3.80133	3.80133	3.01859	3.01859	Major	Major	3.18019	3.94257	3.94079	4.03217	3.91094	3.57192	3.26711	2.80004	3.08311	2.37077	3.18019	3.94257	3.94079	4.03217	3.91094	3.57192	3.26711	2.80004	3.08311	2.37077	-0.78274	3.40996	-3.11047	0.0116792	0.0615042	-3.31368	NonSig	1	Single-promoter
272	ENSG00000058729	RIOK2	chr5	97183242	-	FALSE	1	FB-PB.4034.1	3.38068	3.38068	3.04789	3.04789	Major	Major	2.19665	4.11206	4.10024	3.49064	3.00379	1.6683	4.00877	3.85003	2.07153	3.6408	2.19665	4.11206	4.10024	3.49064	3.00379	1.6683	4.00877	3.85003	2.07153	3.6408	-0.332789	3.21428	-0.590867	0.568346	0.73137	-6.76847	NonSig	1	Single-promoter
273	ENSG00000058804	NDC1	chr1	53838329	-	FALSE	1	FB-PB.157.1	2.952	2.952	3.51173	3.51173	Major	Major	4.70536	2.53402	3.31801	3.20045	1.00217	2.91365	3.68509	3.77344	3.54569	3.6408	4.70536	2.53402	3.31801	3.20045	1.00217	2.91365	3.68509	3.77344	3.54569	3.6408	0.559728	3.23187	0.972369	0.354882	0.54337	-6.4628	NonSig	1	Single-promoter
274	ENSG00000059122	FLYWCH1	chr16	2911994	+	FALSE	1	FB-PB.1900.1	3.22149	3.22149	2.0395	2.0395	Major	Major	3.18019	3.11553	4.02271	3.20045	2.58858	2.42137	2.40969	1.69453	3.67191	0	3.18019	3.11553	4.02271	3.20045	2.58858	2.42137	2.40969	1.69453	3.67191	0	-1.18199	2.6305	-1.98407	0.0767502	0.20808	-5.15496	NonSig	1	Single-promoter
275	ENSG00000059145	UNKL	chr16	1379680	-	FALSE	1	FB-PB.1887.1	0.20345	0.20345	1.01844	1.01844	Inactive	Major	0	0	0	1.01725	0	1.06295	1.65846	0	0	2.37077	0	0	0	1.01725	0	1.06295	1.65846	0	0	2.37077	0.814988	0.610944	1.72493	0.116728	0.266982	-5.54017	NonSig	1	Single-promoter
276	ENSG00000059573	ALDH18A1	chr10	95656843	-	FALSE	1	FB-PB.728.2,FB-PB.728.1	4.67971	4.67971	6.04461	6.04461	Major	Major	4.09833	4.40093	4.75603	4.89111	5.25215	6.05207	5.96506	6.36225	5.92589	5.91776	4.09833	4.40093	4.75603	4.89111	5.25215	6.05207	5.96506	6.36225	5.92589	5.91776	1.3649	5.36216	6.32236	0.000106635	0.00307202	1.52812	UpReg	1	Single-promoter
277	ENSG00000059758	CDK17	chr12	96400562	-	FALSE	1	FB-PB.1295.3,FB-PB.1295.1,FB-PB.1295.2	5.58128	5.58128	5.58727	5.58727	Major	Major	6.23593	5.84659	5.13327	5.55712	5.13349	5.54679	5.53271	5.88642	5.51874	5.4517	6.23593	5.84659	5.13327	5.55712	5.13349	5.54679	5.53271	5.88642	5.51874	5.4517	0.00599067	5.58428	0.026728	0.979228	1	-6.95578	NonSig	1	Single-promoter
278	ENSG00000059804	SLC2A3	chr12	7936187	-	FALSE	1	FB-PB.1104.1,FB-PB.1104.2,FB-PB.1104.3	9.56756	9.56756	8.30644	8.30644	Major	Major	9.69823	9.08597	9.02632	10.2498	9.77747	7.72258	8.6164	8.59696	8.36577	8.23052	9.69823	9.08597	9.02632	10.2498	9.77747	7.72258	8.6164	8.59696	8.36577	8.23052	-1.26111	8.937	-4.63913	0.00104678	0.0133159	-0.840387	DownReg	1	Single-promoter
279	ENSG00000060069	CTDP1	chr18	79679803	+	FALSE	1	FB-PB.2406.1	0	0	0	0	Inactive	Inactive	0	0	0	0	0	0	0	0	0	0	0	0	0	0	0	0	0	0	0	0	0	0	0	1	1	-6.95617	NonSig	1	Single-promoter
280	ENSG00000060138	YBX3	chr12	10723325	-	FALSE	1	FB-PB.1107.1,FB-PB.1107.2	8.04232	8.04232	7.72959	7.72959	Major	Major	7.6941	8.19153	7.75122	8.49363	8.08113	7.66953	7.59212	7.84948	7.86897	7.66783	7.6941	8.19153	7.75122	8.49363	8.08113	7.66953	7.59212	7.84948	7.86897	7.66783	-0.312735	7.88595	-1.86088	0.0938222	0.235487	-5.34119	NonSig	1	Single-promoter
281	ENSG00000060749	QSER1	chr11	32893117	+	FALSE	1	FB-PB.885.1	4.10281	4.10281	4.21683	4.21683	Major	Major	4.02082	4.11206	4.49409	3.49064	4.39645	4.76239	4.35129	4.18175	4.41194	3.37677	4.02082	4.11206	4.49409	3.49064	4.39645	4.76239	4.35129	4.18175	4.41194	3.37677	0.114019	4.15982	0.408066	0.692235	0.822121	-6.8658	NonSig	1	Single-promoter
282	ENSG00000060982	BCAT1	chr12	24903130	-	FALSE	2	FB-PB.1131.2,FB-PB.1131.3	0	3.56405	2.25394	6.99714	Inactive	Minor	0	0	0	0	0	3.28001	1.65846	2.63669	1.64871	2.04584	4.49216	2.27306	3.7615	4.11976	3.17378	8.0424	5.84863	7.51108	5.98642	7.59717	2.25394	1.12697	7.51754	2.635e-05	0.00130683	2.96902	UpReg	2	Multiple-promoter
283	ENSG00000060982	BCAT1	chr12	24949135	-	FALSE	1	FB-PB.1131.4,FB-PB.1131.1,FB-PB.1131.5	3.56405	3.56405	4.7432	6.99714	Major	Major	4.49216	2.27306	3.7615	4.11976	3.17378	4.76239	4.19017	4.87439	4.3377	5.55133	4.49216	2.27306	3.7615	4.11976	3.17378	8.0424	5.84863	7.51108	5.98642	7.59717	1.17915	4.15363	2.76093	0.0209551	0.0917572	-3.89885	NonSig	2	Multiple-promoter
284	ENSG00000061273	HDAC7	chr12	47789917	-	TRUE	2	FB-PB.1164.2	6.72666	11.378	6.7386	10.7207	NA	NA	6.26983	6.91643	6.85615	7.11086	6.48002	6.80862	6.64692	7.02219	6.46854	6.74673	11.1609	11.1801	11.7921	11.4654	11.2916	11.3859	11.2748	9.96895	11.3672	9.60635	0.0119421	6.73263	0.0645336	0.949878	0.988089	-6.9539	NonSig	2	Multiple-promoter
285	ENSG00000061273	HDAC7	chr12	47819886	-	FALSE	1	FB-PB.1164.1	4.65136	11.378	3.98206	10.7207	Minor	Minor	4.89108	4.26371	4.93595	4.35453	4.81154	4.57732	4.62789	2.94676	4.89868	2.85963	11.1609	11.1801	11.7921	11.4654	11.2916	11.3859	11.2748	9.96895	11.3672	9.60635	-0.669306	4.31671	-1.53625	0.156961	0.323159	-5.80283	NonSig	2	Multiple-promoter
286	ENSG00000061676	NCKAP1	chr2	183038321	-	FALSE	1	FB-PB.2898.1,FB-PB.2898.2	6.19966	6.19966	6.25188	6.25188	Major	Major	6.07267	6.53921	5.82354	6.18356	6.37932	5.87597	6.44745	6.42619	6.34132	6.16847	6.07267	6.53921	5.82354	6.18356	6.37932	5.87597	6.44745	6.42619	6.34132	6.16847	0.0522158	6.22577	0.302555	0.768724	0.872245	-6.9063	NonSig	1	Single-promoter
287	ENSG00000061936	SFSWAP	chr12	131711079	+	FALSE	1	FB-PB.1389.1	4.18595	4.18595	3.95776	3.95776	Major	Major	4.75408	4.18988	3.55673	4.425	4.00406	3.57192	3.68509	4.75996	3.25432	4.51753	4.75408	4.18988	3.55673	4.425	4.00406	3.57192	3.68509	4.75996	3.25432	4.51753	-0.228188	4.07186	-0.682701	0.511037	0.682986	-6.70708	NonSig	1	Single-promoter
289	ENSG00000062194	GPBP1	chr5	57173829	+	FALSE	1	FB-PB.3961.1	3.36618	9.46997	3.63676	8.98215	Minor	Minor	3.03003	3.52883	3.31801	3.49064	3.46337	3.57192	3.55876	3.20184	3.54569	4.30559	8.87426	9.89448	9.04709	10.0003	9.53373	8.97756	9.3094	8.37344	8.8858	9.36454	0.270583	3.50147	1.32016	0.217587	0.399925	-6.08049	NonSig	2	Multiple-promoter
290	ENSG00000062194	GPBP1	chr5	57174059	+	FALSE	2	FB-PB.3961.2,FB-PB.3961.4,FB-PB.3961.3,FB-PB.3961.5,FB-PB.3961.6	6.10379	9.46997	5.34539	8.98215	Major	Major	5.84424	6.36565	5.72908	6.50965	6.07036	5.40564	5.75065	5.17161	5.34012	5.05894	8.87426	9.89448	9.04709	10.0003	9.53373	8.97756	9.3094	8.37344	8.8858	9.36454	-0.758404	5.72459	-3.89886	0.00324549	0.0268266	-2.00859	NonSig	2	Multiple-promoter
291	ENSG00000062485	CS	chr12	56300364	-	FALSE	1	FB-PB.1204.1	7.10492	7.10492	7.50424	7.50424	Major	Major	7.07156	7.40661	6.85615	6.8284	7.36186	7.50627	7.64749	7.55565	7.50345	7.30834	7.07156	7.40661	6.85615	6.8284	7.36186	7.50627	7.64749	7.55565	7.50345	7.30834	0.399323	7.30458	2.65866	0.024886	0.101841	-4.06913	NonSig	1	Single-promoter
292	ENSG00000062598	ELMO2	chr20	46406617	-	FALSE	1	FB-PB.3100.1,FB-PB.3100.3,FB-PB.3100.2	1.56319	1.56319	1.58435	1.58435	Major	Major	0.922984	1.54436	0.923938	2.8368	1.58785	2.91365	1.05547	1.31681	0	2.63581	0.922984	1.54436	0.923938	2.8368	1.58785	2.91365	1.05547	1.31681	0	2.63581	0.0211614	1.57377	0.0357469	0.972221	0.99916	-6.95548	NonSig	1	Single-promoter
293	ENSG00000062650	WAPL	chr10	86521794	-	FALSE	1	FB-PB.693.1,FB-PB.693.2,FB-PB.693.3,FB-PB.693.4,FB-PB.693.5,FB-PB.693.6	5.46224	5.46224	5.31251	5.31251	Major	Major	5.7751	5.46358	4.93595	5.70606	5.4305	4.97717	5.72146	5.11065	5.30158	5.4517	5.7751	5.46358	4.93595	5.70606	5.4305	4.97717	5.72146	5.11065	5.30158	5.4517	-0.149726	5.38737	-0.748092	0.472448	0.651321	-6.65849	NonSig	1	Single-promoter
294	ENSG00000062725	APPBP2	chr17	60526231	-	FALSE	1	FB-PB.2251.1,FB-PB.2251.3,FB-PB.2251.2	5.22649	5.22649	5.09647	5.09647	Major	Major	4.80121	5.26215	5.95456	5.52539	4.58912	4.7033	4.91249	5.07917	5.51874	5.26865	4.80121	5.26215	5.95456	5.52539	4.58912	4.7033	4.91249	5.07917	5.51874	5.26865	-0.130014	5.16148	-0.475263	0.645296	0.791859	-6.83396	NonSig	1	Single-promoter
295	ENSG00000063046	EIF4B	chr12	53006278	+	FALSE	1	FB-PB.1186.1,FB-PB.1186.2	7.42761	24.9659	6.60897	23.457	Minor	Minor	8.19086	7.26097	7.3681	7.0564	7.26169	6.86363	7.05055	6.47537	6.73754	5.91776	25.413	25.2236	24.5749	24.5849	25.033	23.605	23.7056	23.6211	23.5558	22.7973	-0.818636	7.01829	-3.03821	0.0131721	0.0670237	-3.43478	NonSig	3	Multiple-promoter
296	ENSG00000063046	EIF4B	chr12	53020007	+	TRUE	2	FB-PB.1186.3	8.97808	24.9659	8.64669	23.457	NA	NA	8.84476	9.09611	8.90735	8.98259	9.05961	8.51524	8.59241	8.81325	8.71275	8.5998	25.413	25.2236	24.5749	24.5849	25.033	23.605	23.7056	23.6211	23.5558	22.7973	-0.331393	8.81239	-3.07046	0.0124831	0.064269	-3.38073	NonSig	3	Multiple-promoter
297	ENSG00000063046	EIF4B	chr12	53028163	+	TRUE	3	FB-PB.1186.4	8.5602	24.9659	8.2013	23.457	NA	NA	8.37735	8.86656	8.29944	8.54595	8.71168	8.22613	8.06266	8.33245	8.10547	8.27977	25.413	25.2236	24.5749	24.5849	25.033	23.605	23.7056	23.6211	23.5558	22.7973	-0.3589	8.38075	-2.61056	0.0269829	0.106572	-4.14893	NonSig	3	Multiple-promoter
298	ENSG00000063322	MED29	chr19	39391381	+	FALSE	1	FB-PB.2539.1,FB-PB.2539.2,FB-PB.2539.3	5.63127	5.63127	4.74399	4.74399	Major	Major	5.36882	5.58376	5.65394	6.22365	5.32616	5.24918	4.42556	3.85003	5.13622	5.05894	5.36882	5.58376	5.65394	6.22365	5.32616	5.24918	4.42556	3.85003	5.13622	5.05894	-0.887281	5.18763	-2.98666	0.0143555	0.0706592	-3.52119	NonSig	1	Single-promoter
299	ENSG00000063660	GPC1	chr2	240435690	+	FALSE	1	FB-PB.3009.1,FB-PB.3009.2	4.18966	4.18966	5.03523	5.03523	Major	Major	5.51733	4.46494	3.7615	3.20045	4.00406	5.16408	5.0597	5.20114	4.48255	5.26865	5.51733	4.46494	3.7615	3.20045	4.00406	5.16408	5.0597	5.20114	4.48255	5.26865	0.845569	4.61244	2.17028	0.0564266	0.170324	-4.86462	NonSig	1	Single-promoter
301	ENSG00000064102	INTS13	chr12	26938309	-	FALSE	1	FB-PB.1136.2,FB-PB.1136.1	3.22228	3.22228	3.93246	3.93246	Major	Major	1.88288	3.84972	4.1738	3.61643	2.58858	4.02226	4.27298	3.51577	3.54569	4.30559	1.88288	3.84972	4.1738	3.61643	2.58858	4.02226	4.27298	3.51577	3.54569	4.30559	0.710177	3.57737	1.65012	0.131412	0.285559	-5.64634	NonSig	1	Single-promoter
302	ENSG00000064115	TM7SF3	chr12	27014437	-	FALSE	1	FB-PB.1138.1,FB-PB.1138.2	3.1573	3.1573	3.42552	3.42552	Major	Major	4.54849	3.94257	1.48263	2.34943	3.46337	3.43334	4.00877	3.41852	3.40734	2.85963	4.54849	3.94257	1.48263	2.34943	3.46337	3.43334	4.00877	3.41852	3.40734	2.85963	0.268224	3.29141	0.497031	0.630424	0.780658	-6.82265	NonSig	1	Single-promoter
304	ENSG00000064419	TNPO3	chr7	129000484	-	TRUE	2	FB-PB.4643.4	5.1164	9.89847	5.49966	10.5782	NA	NA	4.54849	5.72115	5.4908	4.425	5.39655	5.87597	5.23517	5.88642	4.94942	5.55133	8.98203	10.8315	10.6605	8.91718	10.1012	10.8024	10.3853	11.2531	10.0856	10.3648	0.383267	5.30803	1.25284	0.24011	0.42568	-6.16117	NonSig	2	Multiple-promoter
305	ENSG00000064419	TNPO3	chr7	129055126	-	FALSE	1	FB-PB.4643.3,FB-PB.4643.1	4.78207	9.89847	5.07858	10.5782	Minor	Minor	4.43354	5.11032	5.16969	4.49218	4.70461	4.9264	5.1501	5.36671	5.13622	4.81348	8.98203	10.8315	10.6605	8.91718	10.1012	10.8024	10.3853	11.2531	10.0856	10.3648	0.296513	4.93033	1.58519	0.145484	0.305724	-5.73636	NonSig	2	Multiple-promoter
306	ENSG00000064607	SUGP2	chr19	19033515	-	FALSE	1	FB-PB.2497.1,FB-PB.2497.2,FB-PB.2497.3	1.70804	1.70804	2.15321	2.15321	Major	Major	0.922984	0.969653	3.0318	2.6136	1.00217	2.42137	1.05547	1.9936	2.07153	3.2241	0.922984	0.969653	3.0318	2.6136	1.00217	2.42137	1.05547	1.9936	2.07153	3.2241	0.445173	1.93063	0.829462	0.427116	0.611191	-6.59257	NonSig	1	Single-promoter
307	ENSG00000064652	SNX24	chr5	122845570	+	FALSE	1	FB-PB.4067.1	0	0	1.89101	1.89101	Inactive	Major	0	0	0	0	0	3.28001	2.08243	1.69453	2.3981	0	0	0	0	0	0	3.28001	2.08243	1.69453	2.3981	0	1.89101	0.945507	3.76415	0.00401933	0.0302809	-2.22815	UpReg	1	Single-promoter
308	ENSG00000064763	FAR2	chr12	29149274	+	FALSE	1	FB-PB.1142.1	1.69794	1.69794	1.72255	1.72255	Major	Major	3.03003	0	2.45587	0	3.00379	0	2.40969	3.31424	2.88882	0	3.03003	0	2.45587	0	3.00379	0	2.40969	3.31424	2.88882	0	0.0246114	1.71024	0.0266725	0.979271	1	-6.95579	NonSig	1	Single-promoter
309	ENSG00000064933	PMS1	chr2	189784504	+	FALSE	1	FB-PB.2906.1	2.877	2.877	1.83352	1.83352	Major	Major	3.66089	2.27306	3.66274	3.20045	1.58785	2.91365	1.65846	2.94676	1.64871	0	3.66089	2.27306	3.66274	3.20045	1.58785	2.91365	1.65846	2.94676	1.64871	0	-1.04348	2.35526	-1.66405	0.128558	0.281391	-5.62676	NonSig	1	Single-promoter
310	ENSG00000065029	ZNF76	chr6	35259714	+	FALSE	1	FB-PB.4227.1	2.00349	2.00349	2.23509	2.23509	Major	Major	2.45422	2.75493	2.19823	1.60792	1.00217	2.68841	2.08243	1.69453	2.66422	2.04584	2.45422	2.75493	2.19823	1.60792	1.00217	2.68841	2.08243	1.69453	2.66422	2.04584	0.231593	2.11929	0.665704	0.521375	0.692111	-6.71906	NonSig	1	Single-promoter
311	ENSG00000065135	GNAI3	chr1	109548606	+	FALSE	1	FB-PB.264.1,FB-PB.264.2,FB-PB.264.3	6.54111	6.54111	6.60284	6.60284	Major	Major	5.93155	7.12891	6.55946	6.40893	6.67672	6.209	6.58344	7.10266	6.5198	6.59932	5.93155	7.12891	6.55946	6.40893	6.67672	6.209	6.58344	7.10266	6.5198	6.59932	0.0617332	6.57198	0.259887	0.800475	0.892276	-6.91933	NonSig	1	Single-promoter
312	ENSG00000065150	IPO5	chr13	97976561	+	FALSE	1	FB-PB.1506.1,FB-PB.1506.2,FB-PB.1506.3,FB-PB.1506.4	6.53543	6.53543	7.24019	7.24019	Major	Major	6.41324	6.68071	6.33733	6.81535	6.43055	6.91662	6.99064	7.5326	7.36079	7.40029	6.41324	6.68071	6.33733	6.81535	6.43055	6.91662	6.99064	7.5326	7.36079	7.40029	0.704756	6.88781	4.3113	0.00171154	0.0178646	-1.34907	NonSig	1	Single-promoter
313	ENSG00000065183	WDR3	chr1	117929737	+	FALSE	1	FB-PB.291.1,FB-PB.291.2,FB-PB.291.3	3.02337	3.02337	2.04895	2.04895	Major	Major	3.55488	1.95424	3.18199	2.8368	3.58894	2.68841	2.08243	2.80004	1.04808	1.62578	3.55488	1.95424	3.18199	2.8368	3.58894	2.68841	2.08243	2.80004	1.04808	1.62578	-0.974423	2.53616	-2.33838	0.0426216	0.141867	-4.59526	NonSig	1	Single-promoter
314	ENSG00000065243	PKN2	chr1	88684249	+	FALSE	1	FB-PB.222.1,FB-PB.222.2,FB-PB.222.5,FB-PB.222.4,FB-PB.222.3	7.03035	7.03035	6.20784	6.20784	Major	Major	7.61057	6.79718	7.1666	6.6189	6.9585	6.33113	6.25716	6.33586	6.92669	5.18838	7.61057	6.79718	7.1666	6.6189	6.9585	6.33113	6.25716	6.33586	6.92669	5.18838	-0.822506	6.6191	-2.6177	0.0266605	0.105832	-4.13709	NonSig	1	Single-promoter
317	ENSG00000065308	TRAM2	chr6	52577039	-	FALSE	1	FB-PB.4267.1,FB-PB.4267.3,FB-PB.4267.4,FB-PB.4267.8	5.89166	5.89166	5.95902	5.95902	Major	Major	6.07267	5.61231	5.93353	6.16309	5.67668	5.67534	6.31693	6.45099	5.48474	5.8671	6.07267	5.61231	5.93353	6.16309	5.67668	5.67534	6.31693	6.45099	5.48474	5.8671	0.0673624	5.92534	0.314149	0.760171	0.867313	-6.90242	NonSig	1	Single-promoter
318	ENSG00000065457	ADAT1	chr16	75623281	-	TRUE	1	FB-PB.2046.1,FB-PB.2046.2	3.781	3.781	4.84815	4.84815	NA	NA	2.45422	4.26371	4.1738	3.83923	4.17402	5.58002	5.10561	4.49963	4.99844	4.05708	2.45422	4.26371	4.1738	3.83923	4.17402	5.58002	5.10561	4.49963	4.99844	4.05708	1.06716	4.31458	2.65324	0.0251138	0.10234	-4.07813	NonSig	1	Single-promoter
319	ENSG00000065491	TBC1D22B	chr6	37257772	+	FALSE	1	FB-PB.4238.1	3.28892	3.28892	3.70608	3.70608	Major	Major	3.18019	3.40377	3.18199	3.35283	3.32583	3.28001	4.00877	3.60687	3.40734	4.22742	3.18019	3.40377	3.18199	3.35283	3.32583	3.28001	4.00877	3.60687	3.40734	4.22742	0.417159	3.4975	2.18918	0.0546813	0.167313	-4.83465	NonSig	1	Single-promoter
320	ENSG00000065833	ME1	chr6	83431003	-	FALSE	1	FB-PB.4298.1	3.92799	3.92799	3.70241	3.70241	Major	Major	3.66089	2.75493	4.49409	4.20234	4.52771	4.43928	4.00877	3.41852	2.88882	3.75666	3.66089	2.75493	4.49409	4.20234	4.52771	4.43928	4.00877	3.41852	2.88882	3.75666	-0.225581	3.8152	-0.567679	0.583368	0.741368	-6.78268	NonSig	1	Single-promoter
321	ENSG00000065923	SLC9A7	chrX	46759166	-	FALSE	1	FB-PB.5281.1	1.11281	1.11281	2.18144	2.18144	Major	Major	3.03003	2.53402	0	0	0	3.10843	2.40969	1.69453	1.64871	2.04584	3.03003	2.53402	0	0	0	3.10843	2.40969	1.69453	1.64871	2.04584	1.06863	1.64713	1.57036	0.14888	0.31153	-5.75663	NonSig	1	Single-promoter
322	ENSG00000065978	YBX1	chr1	42682427	+	FALSE	1	FB-PB.125.1	9.31091	9.31091	9.1449	9.1449	Major	Major	9.60503	9.4326	9.33773	9.18905	8.99017	8.93036	9.15582	9.60756	9.21856	8.81221	9.60503	9.4326	9.33773	9.18905	8.99017	8.93036	9.15582	9.60756	9.21856	8.81221	-0.166013	9.22791	-0.920277	0.380117	0.568049	-6.5121	NonSig	1	Single-promoter
323	ENSG00000065989	PDE4A	chr19	10430813	+	FALSE	1	FB-PB.2454.1	4.03802	4.03802	2.81552	2.81552	Major	Major	2.19665	3.84972	4.60463	4.89111	4.64802	2.42137	2.67627	3.20184	3.40734	2.37077	2.19665	3.84972	4.60463	4.89111	4.64802	2.42137	2.67627	3.20184	3.40734	2.37077	-1.22251	3.42677	-2.45779	0.0348849	0.124254	-4.40072	NonSig	1	Single-promoter
324	ENSG00000066027	PPP2R5A	chr1	212285507	+	FALSE	1	FB-PB.480.1	4.78848	4.78848	4.42631	4.42631	Major	Major	4.70536	4.84763	4.49409	4.89111	5.0042	3.69835	4.42556	4.59173	4.54987	4.86603	4.70536	4.84763	4.49409	4.89111	5.0042	3.69835	4.42556	4.59173	4.54987	4.86603	-0.36217	4.60739	-1.68624	0.124125	0.276425	-5.59539	NonSig	1	Single-promoter
325	ENSG00000066135	KDM4A	chr1	43650149	+	FALSE	1	FB-PB.131.1,FB-PB.131.2,FB-PB.131.3	4.07313	4.07313	3.84148	3.84148	Major	Major	4.02082	3.64391	4.43547	4.35453	3.91094	4.76239	4.00877	2.80004	3.99538	3.6408	4.02082	3.64391	4.43547	4.35453	3.91094	4.76239	4.00877	2.80004	3.99538	3.6408	-0.231657	3.9573	-0.697739	0.501996	0.674955	-6.69626	NonSig	1	Single-promoter
326	ENSG00000066422	ZBTB11	chr3	101677132	-	FALSE	1	FB-PB.3467.1	5.43748	5.43748	4.77601	4.77601	Major	Major	5.70249	6.31445	4.80316	5.07766	5.28963	4.02226	5.10561	4.63566	5.41424	4.70228	5.70249	6.31445	4.80316	5.07766	5.28963	4.02226	5.10561	4.63566	5.41424	4.70228	-0.661466	5.10674	-1.9722	0.0782582	0.210588	-5.17313	NonSig	1	Single-promoter
327	ENSG00000066455	GOLGA5	chr14	92794334	+	FALSE	1	FB-PB.1684.1,FB-PB.1684.2	3.38108	3.38108	3.91632	3.91632	Major	Major	1.48133	3.84972	4.31056	3.35283	3.91094	4.28662	4.4962	3.85003	3.8954	3.05334	1.48133	3.84972	4.31056	3.35283	3.91094	4.28662	4.4962	3.85003	3.8954	3.05334	0.535244	3.6487	1.03496	0.326216	0.517874	-6.40064	NonSig	1	Single-promoter
328	ENSG00000066654	THUMPD1	chr16	20741824	-	FALSE	1	FB-PB.1932.2,FB-PB.1932.1	5.07439	5.07439	4.89184	4.89184	Major	Major	3.85205	5.77264	5.46172	5.28133	5.0042	5.20726	4.68948	5.01409	4.84609	4.70228	3.85205	5.77264	5.46172	5.28133	5.0042	5.20726	4.68948	5.01409	4.84609	4.70228	-0.182549	4.98311	-0.557903	0.589765	0.746109	-6.7885	NonSig	1	Single-promoter
329	ENSG00000066739	ATG2B	chr14	96363377	-	FALSE	1	FB-PB.1689.1	4.79915	4.79915	4.57371	4.57371	Major	Major	5.36882	4.46494	4.31056	5.52539	4.32605	4.81916	4.74855	3.92276	4.73479	4.64328	5.36882	4.46494	4.31056	5.52539	4.32605	4.81916	4.74855	3.92276	4.73479	4.64328	-0.225444	4.68643	-0.750517	0.471054	0.650314	-6.65662	NonSig	1	Single-promoter
330	ENSG00000066777	ARFGEF1	chr8	67227172	-	FALSE	1	FB-PB.4818.1	5.49086	5.49086	5.80071	5.80071	Major	Major	5.51733	5.6947	5.30682	5.20328	5.73217	5.79338	5.59841	6.04144	5.67766	5.89265	5.51733	5.6947	5.30682	5.20328	5.73217	5.79338	5.59841	6.04144	5.67766	5.89265	0.309846	5.64578	2.09927	0.0634809	0.183789	-4.97647	NonSig	1	Single-promoter
331	ENSG00000066827	ZFAT	chr8	134713098	-	FALSE	1	FB-PB.4912.1	0.490844	0.490844	0.86041	0.86041	Major	Major	2.45422	0	0	0	0	0	2.67627	0	0	1.62578	2.45422	0	0	0	0	0	2.67627	0	0	1.62578	0.369566	0.675627	0.541579	0.600531	0.754854	-6.79803	NonSig	1	Single-promoter
332	ENSG00000067048	DDX3Y	chrY	12904823	+	FALSE	1	FB-PB.5397.1,FB-PB.5397.2,FB-PB.5397.3	5.30826	5.30826	5.58362	5.58362	Major	Major	7.43495	7.84581	1.88435	8.37404	1.00217	7.12235	7.08534	3.20184	6.75191	3.75666	7.43495	7.84581	1.88435	8.37404	1.00217	7.12235	7.08534	3.20184	6.75191	3.75666	0.275355	5.44594	0.165746	0.871817	0.938401	-6.94116	NonSig	1	Single-promoter
333	ENSG00000067064	IDI1	chr10	1048948	-	FALSE	1	FB-PB.562.1,FB-PB.562.2	3.08728	3.08728	3.67768	3.67768	Major	Major	0	4.6415	3.85393	3.03005	3.91094	2.91365	3.90873	4.40125	3.78798	3.37677	0	4.6415	3.85393	3.03005	3.91094	2.91365	3.90873	4.40125	3.78798	3.37677	0.590393	3.38248	0.752938	0.469665	0.649408	-6.65474	NonSig	1	Single-promoter
334	ENSG00000067066	SP100	chr2	230416201	+	FALSE	1	FB-PB.2984.1,FB-PB.2984.2,FB-PB.2984.3	4.60193	4.60193	4.23037	4.23037	Major	Major	4.70536	4.0298	4.89303	4.73343	4.64802	4.64169	3.42029	3.69256	5.09174	4.30559	4.70536	4.0298	4.89303	4.73343	4.64802	4.64169	3.42029	3.69256	5.09174	4.30559	-0.371555	4.41615	-1.15107	0.277745	0.46855	-6.27732	NonSig	1	Single-promoter
335	ENSG00000067082	KLF6	chr10	3785209	-	TRUE	1	FB-PB.565.2,FB-PB.565.1,FB-PB.565.3,FB-PB.565.4,FB-PB.565.6	9.16306	9.16306	9.14958	9.14958	NA	NA	9.49109	8.93313	8.75088	9.47096	9.16923	8.9559	9.34473	9.22988	9.17658	9.04083	9.49109	8.93313	8.75088	9.47096	9.16923	8.9559	9.34473	9.22988	9.17658	9.04083	-0.0134733	9.15632	-0.0786533	0.938934	0.982749	-6.95279	NonSig	1	Single-promoter
336	ENSG00000067177	PHKA1	chrX	72714284	-	FALSE	1	FB-PB.5313.1	3.15454	3.15454	2.13412	2.13412	Major	Major	4.89108	2.53402	3.31801	2.0258	3.00379	3.43334	2.40969	0.803701	2.3981	1.62578	4.89108	2.53402	3.31801	2.0258	3.00379	3.43334	2.40969	0.803701	2.3981	1.62578	-1.02042	2.64433	-1.6829	0.124784	0.277313	-5.60013	NonSig	1	Single-promoter
337	ENSG00000067191	CACNB1	chr17	39197667	-	FALSE	1	FB-PB.2165.1	4.26357	4.26357	3.15163	3.15163	Major	Major	3.75963	5.11032	3.31801	4.73343	4.39645	2.68841	3.68509	1.9936	4.3377	3.05334	3.75963	5.11032	3.31801	4.73343	4.39645	2.68841	3.68509	1.9936	4.3377	3.05334	-1.11194	3.7076	-2.30679	0.044936	0.146716	-4.64631	NonSig	1	Single-promoter
338	ENSG00000067248	DHX29	chr5	55307679	-	FALSE	1	FB-PB.3956.1	3.49908	3.49908	3.4965	3.4965	Major	Major	3.44047	2.94647	3.31801	3.61643	4.17402	3.57192	3.26711	4.23984	2.88882	3.51481	3.44047	2.94647	3.31801	3.61643	4.17402	3.57192	3.26711	4.23984	2.88882	3.51481	-0.00257802	3.49779	-0.00896598	0.993031	1	-6.95613	NonSig	1	Single-promoter
339	ENSG00000067334	DNTTIP2	chr1	93879184	-	FALSE	1	FB-PB.241.1	5.02109	5.02109	4.7219	4.7219	Major	Major	5.59961	5.02796	4.10024	5.78855	4.58912	4.97717	5.10561	4.40125	4.25943	4.86603	5.59961	5.02796	4.10024	5.78855	4.58912	4.97717	5.10561	4.40125	4.25943	4.86603	-0.299195	4.8715	-0.891084	0.394809	0.581281	-6.53874	NonSig	1	Single-promoter
340	ENSG00000067369	TP53BP1	chr15	43493156	-	FALSE	1	FB-PB.1758.1	2.87183	2.87183	2.29096	2.29096	Major	Major	4.30864	2.53402	1.48263	3.03005	3.00379	2.09343	2.67627	2.24119	2.3981	2.04584	4.30864	2.53402	1.48263	3.03005	3.00379	2.09343	2.67627	2.24119	2.3981	2.04584	-0.580864	2.5814	-1.32355	0.2165	0.3988	-6.07634	NonSig	1	Single-promoter
341	ENSG00000067596	DHX8	chr17	43483955	+	FALSE	1	FB-PB.2201.1	4.39551	4.39551	4.92857	4.92857	Major	Major	4.09833	4.6415	3.55673	4.67679	5.0042	5.28991	4.62789	4.94593	4.67574	5.10339	4.09833	4.6415	3.55673	4.67679	5.0042	5.28991	4.62789	4.94593	4.67574	5.10339	0.533061	4.66204	1.94137	0.0823061	0.218311	-5.22009	NonSig	1	Single-promoter
342	ENSG00000067704	IARS2	chr1	220094123	+	FALSE	1	FB-PB.493.1,FB-PB.493.2	4.83264	4.83264	5.05246	5.05246	Major	Major	5.43007	4.89487	5.05755	3.73212	5.0486	5.36809	4.74855	5.07917	5.48474	4.58177	5.43007	4.89487	5.05755	3.73212	5.0486	5.36809	4.74855	5.07917	5.48474	4.58177	0.219821	4.94255	0.685736	0.509205	0.681595	-6.70492	NonSig	1	Single-promoter
343	ENSG00000067798	NAV3	chr12	78199383	+	FALSE	1	FB-PB.1263.1	5.24357	5.24357	4.47445	4.47445	Major	Major	4.43354	4.98495	5.23989	5.64831	5.91115	4.76239	4.27298	4.40125	4.17667	4.75895	4.43354	4.98495	5.23989	5.64831	5.91115	4.76239	4.27298	4.40125	4.17667	4.75895	-0.769119	4.85901	-2.79083	0.019929	0.0886287	-3.84895	NonSig	1	Single-promoter
344	ENSG00000067955	CBFB	chr16	67029152	+	FALSE	1	FB-PB.2008.1,FB-PB.2008.2,FB-PB.2008.3	5.03244	5.03244	5.80636	5.80636	Major	Major	4.84684	5.6947	5.16969	4.9874	4.46357	5.84896	5.46388	6.08962	5.92589	5.70347	4.84684	5.6947	5.16969	4.9874	4.46357	5.84896	5.46388	6.08962	5.92589	5.70347	0.773921	5.4194	3.41915	0.00701944	0.0435161	-2.79787	NonSig	1	Single-promoter
345	ENSG00000068097	HEATR6	chr17	60078921	-	FALSE	1	FB-PB.2246.1	3.19354	3.19354	2.31382	2.31382	Major	Major	2.8624	3.26684	3.7615	2.6136	3.46337	3.43334	3.42029	2.63669	1.04808	1.03072	2.8624	3.26684	3.7615	2.6136	3.46337	3.43334	3.42029	2.63669	1.04808	1.03072	-0.879718	2.75368	-1.64044	0.13343	0.28835	-5.65989	NonSig	1	Single-promoter
346	ENSG00000068305	MEF2A	chr15	99565916	+	FALSE	1	FB-PB.1877.1,FB-PB.1877.2,FB-PB.1877.3	5.92938	5.92938	4.98407	4.98407	Major	Major	6.59806	5.52492	5.60158	6.52577	5.39655	4.50995	5.3916	4.75996	4.67574	5.58307	6.59806	5.52492	5.60158	6.52577	5.39655	4.50995	5.3916	4.75996	4.67574	5.58307	-0.945312	5.45672	-2.95953	0.0150212	0.0727479	-3.56665	NonSig	1	Single-promoter
347	ENSG00000068323	TFE3	chrX	49043351	-	FALSE	1	FB-PB.5287.1	6.07142	6.07142	5.56549	5.56549	Major	Major	6.21868	5.91693	5.95456	6.26266	6.00427	5.51277	5.96506	5.62826	5.34012	5.38124	6.21868	5.91693	5.95456	6.26266	6.00427	5.51277	5.96506	5.62826	5.34012	5.38124	-0.505928	5.81845	-3.38939	0.00736966	0.0448032	-2.8474	NonSig	1	Single-promoter
348	ENSG00000068366	ACSL4	chrX	109663268	-	TRUE	2	FB-PB.5350.4	5.74339	10.616	7.28791	13.6099	NA	NA	5.23792	5.77264	5.72908	6.30064	5.67668	7.18848	7.06224	7.84948	7.21288	7.12645	10.3692	9.41655	10.5779	11.5435	11.1728	13.48	12.8696	14.4849	13.2602	13.9549	1.54451	6.51565	7.0046	4.70318e-05	0.00188031	2.37348	UpReg	2	Multiple-promoter
349	ENSG00000068366	ACSL4	chrX	109733294	-	FALSE	1	FB-PB.5350.3,FB-PB.5350.1,FB-PB.5350.2	4.87259	10.616	6.32201	13.6099	Minor	Minor	5.13131	3.64391	4.84879	5.24283	5.49609	6.29156	5.80731	6.6354	6.04732	6.82844	10.3692	9.41655	10.5779	11.5435	11.1728	13.48	12.8696	14.4849	13.2602	13.9549	1.44942	5.5973	4.10063	0.00236634	0.0218567	-1.6834	UpReg	2	Multiple-promoter
350	ENSG00000068400	GRIPAP1	chrX	49002261	-	FALSE	1	FB-PB.5285.1	2.92885	2.92885	2.41733	2.41733	Major	Major	2.8624	3.26684	2.6744	2.8368	3.00379	2.42137	2.08243	1.69453	2.66422	3.2241	2.8624	3.26684	2.6744	2.8368	3.00379	2.42137	2.08243	1.69453	2.66422	3.2241	-0.511514	2.67309	-1.90238	0.0877085	0.226101	-5.27904	NonSig	1	Single-promoter
351	ENSG00000068654	POLR1A	chr2	86105878	-	FALSE	1	FB-PB.2766.1	2.31008	2.31008	3.07776	3.07776	Major	Major	2.19665	3.26684	3.7615	0	2.3254	3.43334	2.40969	2.94676	3.54569	3.05334	2.19665	3.26684	3.7615	0	2.3254	3.43334	2.40969	2.94676	3.54569	3.05334	0.767686	2.69392	1.22519	0.2499	0.436517	-6.19343	NonSig	1	Single-promoter
353	ENSG00000068784	SRBD1	chr2	45611267	-	FALSE	1	FB-PB.2694.1	1.44221	1.44221	2.09726	2.09726	Major	Major	0	2.27306	0	2.34943	2.58858	2.09343	3.26711	3.07993	0	2.04584	0	2.27306	0	2.34943	2.58858	2.09343	3.26711	3.07993	0	2.04584	0.655049	1.76974	0.857835	0.412022	0.597306	-6.56819	NonSig	1	Single-promoter
354	ENSG00000068796	KIF2A	chr5	62306463	+	FALSE	1	FB-PB.3964.1	6.01821	6.01821	5.84176	5.84176	Major	Major	6.42833	5.87042	6.18553	5.64831	5.95846	5.90248	6.0845	5.69206	6.22258	5.30716	6.42833	5.87042	6.18553	5.64831	5.95846	5.90248	6.0845	5.69206	6.22258	5.30716	-0.176452	5.92998	-0.839199	0.421894	0.605932	-6.58428	NonSig	1	Single-promoter
355	ENSG00000068885	IFT80	chr3	160399239	-	FALSE	1	FB-PB.3590.3,FB-PB.3590.2	1.86343	1.86343	2.26157	2.26157	Major	Major	0	3.40377	1.88435	2.0258	2.00325	2.91365	2.40969	1.69453	2.66422	1.62578	0	3.40377	1.88435	2.0258	2.00325	2.91365	2.40969	1.69453	2.66422	1.62578	0.398141	2.0625	0.714358	0.492119	0.668271	-6.68406	NonSig	1	Single-promoter
357	ENSG00000069248	NUP133	chr1	229508361	-	FALSE	1	FB-PB.522.1,FB-PB.522.2	3.71306	3.71306	2.85787	2.85787	Major	Major	3.85205	4.18988	3.31801	3.61643	3.58894	1.06295	3.90873	3.69256	3.25432	2.37077	3.85205	4.18988	3.31801	3.61643	3.58894	1.06295	3.90873	3.69256	3.25432	2.37077	-0.855193	3.28546	-1.70131	0.121195	0.273198	-5.57397	NonSig	1	Single-promoter
359	ENSG00000069329	VPS35	chr16	46678968	-	TRUE	2	FB-PB.1974.6	6.27856	7.99173	6.51777	9.27853	NA	NA	5.67745	6.22486	6.46004	6.63386	6.3966	6.51418	6.17341	6.8924	6.37883	6.63003	8.35014	8.1791	6.46004	10.5728	6.3966	9.20259	8.84968	10.2066	8.45036	9.68337	0.239211	6.39817	1.1634	0.272949	0.463551	-6.26363	NonSig	2	Multiple-promoter
360	ENSG00000069329	VPS35	chr16	46689178	-	FALSE	1	FB-PB.1974.2,FB-PB.1974.4	1.71317	7.99173	2.76076	9.27853	Minor	Minor	2.6727	1.95424	0	3.93892	0	2.68841	2.67627	3.31424	2.07153	3.05334	8.35014	8.1791	6.46004	10.5728	6.3966	9.20259	8.84968	10.2066	8.45036	9.68337	1.04759	2.23696	1.42632	0.18568	0.360147	-5.94747	NonSig	2	Multiple-promoter
361	ENSG00000069345	DNAJA2	chr16	46973671	-	FALSE	1	FB-PB.1975.1,FB-PB.1975.2	6.97408	6.97408	6.93642	6.93642	Major	Major	6.65047	7.26996	6.79917	7.20398	6.94681	6.76595	6.95347	6.8924	7.12733	6.94294	6.65047	7.26996	6.79917	7.20398	6.94681	6.76595	6.95347	6.8924	7.12733	6.94294	-0.0376639	6.95525	-0.254044	0.804855	0.895858	-6.92096	NonSig	1	Single-promoter
362	ENSG00000069702	TGFBR3	chr1	91886151	-	FALSE	1	FB-PB.231.1,FB-PB.231.3	5.79134	5.79134	4.73363	4.73363	Major	Major	5.67745	5.06973	5.75328	5.55712	6.89912	4.36497	4.4962	4.7197	5.22127	4.86603	5.67745	5.06973	5.75328	5.55712	6.89912	4.36497	4.4962	4.7197	5.22127	4.86603	-1.0577	5.26249	-3.30309	0.00849177	0.0491444	-2.99135	DownReg	1	Single-promoter
363	ENSG00000069869	NEDD4	chr15	55993583	-	FALSE	1	FB-PB.1782.1	3.9449	3.9449	4.66569	4.66569	Major	Major	4.49216	3.84972	3.7615	4.03217	3.58894	4.64169	4.91249	4.7197	4.08887	4.96571	4.49216	3.84972	3.7615	4.03217	3.58894	4.64169	4.91249	4.7197	4.08887	4.96571	0.720795	4.3053	3.29135	0.00865753	0.0498094	-3.01095	NonSig	1	Single-promoter
364	ENSG00000069956	MAPK6	chr15	52019231	+	FALSE	1	FB-PB.1776.1,FB-PB.1776.2	3.55076	8.80776	3.90147	9.13685	Minor	Minor	3.31619	3.75048	4.02271	3.49064	3.17378	3.92216	4.00877	3.85003	3.08311	4.64328	9.38886	10.0822	8.33327	7.77108	8.46341	9.17134	9.20204	9.21674	8.26248	9.83167	0.350711	3.72612	1.24969	0.241208	0.427047	-6.16487	NonSig	2	Multiple-promoter
365	ENSG00000069956	MAPK6	chr15	52019952	+	FALSE	2	FB-PB.1776.4,FB-PB.1776.5	5.257	8.80776	5.23538	9.13685	Major	Major	6.07267	6.33172	4.31056	4.28044	5.28963	5.24918	5.19327	5.36671	5.17937	5.18838	9.38886	10.0822	8.33327	7.77108	8.46341	9.17134	9.20204	9.21674	8.26248	9.83167	-0.0216227	5.24619	-0.0536342	0.958333	0.992155	-6.9546	NonSig	2	Multiple-promoter
366	ENSG00000069966	GNB5	chr15	52179980	-	FALSE	1	FB-PB.1777.1,FB-PB.1777.2	3.94335	3.94335	2.99176	2.99176	Major	Major	4.30864	4.18988	4.02271	3.73212	3.46337	3.10843	2.40969	3.60687	3.78798	2.04584	4.30864	4.18988	4.02271	3.73212	3.46337	3.10843	2.40969	3.60687	3.78798	2.04584	-0.951585	3.46755	-2.72156	0.0223884	0.0951385	-3.96449	NonSig	1	Single-promoter
367	ENSG00000069974	RAB27A	chr15	55289838	-	FALSE	1	FB-PB.1781.1	1.0316	1.0316	3.56859	3.56859	Major	Major	0	1.54436	0	2.0258	1.58785	3.28001	2.90118	4.05806	4.08887	3.51481	0	1.54436	0	2.0258	1.58785	3.28001	2.90118	4.05806	4.08887	3.51481	2.53699	2.30009	5.59007	0.000274398	0.00578006	0.54844	UpReg	1	Single-promoter
368	ENSG00000070018	LRP6	chr12	12267031	-	FALSE	1	FB-PB.1112.1	5.69216	5.69216	5.31393	5.31393	Major	Major	5.45974	5.6947	5.33916	5.73408	6.2331	5.44224	5.23517	4.94593	5.67766	5.26865	5.45974	5.6947	5.33916	5.73408	6.2331	5.44224	5.23517	4.94593	5.67766	5.26865	-0.378227	5.50304	-1.89956	0.0881122	0.226633	-5.28328	NonSig	1	Single-promoter
369	ENSG00000070061	ELP1	chr9	108934093	-	FALSE	1	FB-PB.5056.1,FB-PB.5056.2,FB-PB.5056.3	1.16324	1.16324	0.263362	0.263362	Major	Major	1.88288	0	0	1.60792	2.3254	0	0	1.31681	0	0	1.88288	0	0	1.60792	2.3254	0	0	1.31681	0	0	-0.899876	0.7133	-1.74515	0.113023	0.262491	-5.51105	NonSig	1	Single-promoter
370	ENSG00000070214	SLC44A1	chr9	105244607	+	FALSE	1	FB-PB.5054.2,FB-PB.5054.1,FB-PB.5054.3,FB-PB.5054.4,FB-PB.5054.5,FB-PB.5054.6	4.87401	4.87401	4.1346	4.1346	Major	Major	4.97568	5.02796	4.65688	4.61784	5.09167	3.81459	4.91249	4.40125	3.78798	3.75666	4.97568	5.02796	4.65688	4.61784	5.09167	3.81459	4.91249	4.40125	3.78798	3.75666	-0.739412	4.5043	-3.03452	0.0132532	0.0672223	-3.44095	NonSig	1	Single-promoter
371	ENSG00000070269	TMEM260	chr14	56579798	+	FALSE	1	FB-PB.1607.3,FB-PB.1607.2,FB-PB.1607.5	2.13254	2.13254	1.02917	1.02917	Major	Major	3.85205	2.27306	0.923938	2.0258	1.58785	1.6683	0	0.803701	1.04808	1.62578	3.85205	2.27306	0.923938	2.0258	1.58785	1.6683	0	0.803701	1.04808	1.62578	-1.10337	1.58086	-2.06608	0.0670603	0.189706	-5.02828	NonSig	1	Single-promoter
372	ENSG00000070367	EXOC5	chr14	57268548	-	FALSE	2	FB-PB.1609.4	0.493659	3.97667	0.986075	5.47331	Minor	Minor	0	1.54436	0.923938	0	0	0	1.65846	2.24119	0	1.03072	3.55488	5.87831	3.95574	3.49064	3.00379	4.20377	6.22201	6.74082	3.78798	6.41196	0.492416	0.739867	0.967659	0.357112	0.545484	-6.46735	NonSig	2	Multiple-promoter
373	ENSG00000070367	EXOC5	chr14	57268872	-	FALSE	1	FB-PB.1609.1,FB-PB.1609.2,FB-PB.1609.3	3.48301	3.97667	4.48723	5.47331	Major	Major	3.55488	4.33395	3.0318	3.49064	3.00379	4.20377	4.56355	4.49963	3.78798	5.38124	3.55488	5.87831	3.95574	3.49064	3.00379	4.20377	6.22201	6.74082	3.78798	6.41196	1.00422	3.98512	2.97487	0.014641	0.071794	-3.54094	NonSig	2	Multiple-promoter
374	ENSG00000070413	DGCR2	chr22	19122412	-	FALSE	1	FB-PB.3188.1	4.52641	4.52641	3.85942	3.85942	Major	Major	4.97568	5.06973	4.55042	4.03217	4.00406	3.69835	3.80124	3.60687	4.54987	3.6408	4.97568	5.06973	4.55042	4.03217	4.00406	3.69835	3.80124	3.60687	4.54987	3.6408	-0.666988	4.19292	-2.41934	0.0372116	0.129481	-4.46361	NonSig	1	Single-promoter
375	ENSG00000070423	RNF126	chr19	663214	-	FALSE	1	FB-PB.2410.1	4.36959	4.36959	4.19426	4.19426	Major	Major	4.934	4.58502	3.66274	4.49218	4.17402	4.28662	3.55876	4.63566	3.78798	4.70228	4.934	4.58502	3.66274	4.49218	4.17402	4.28662	3.55876	4.63566	3.78798	4.70228	-0.175335	4.28193	-0.586886	0.57091	0.732569	-6.77095	NonSig	1	Single-promoter
376	ENSG00000070718	AP3M2	chr8	42153036	+	FALSE	1	FB-PB.4781.1,FB-PB.4781.2	1.67401	1.67401	2.41448	2.41448	Major	Major	0	2.27306	1.48263	2.0258	2.58858	2.68841	2.67627	2.80004	1.04808	2.85963	0	2.27306	1.48263	2.0258	2.58858	2.68841	2.67627	2.80004	1.04808	2.85963	0.74047	2.04425	1.39734	0.193967	0.370532	-5.98445	NonSig	1	Single-promoter
377	ENSG00000070756	PABPC1	chr8	100715588	-	TRUE	4	FB-PB.4866.13	9.87006	39.5714	10.3893	40.2778	NA	NA	9.57991	10.1074	9.40991	10.184	10.0691	10.3532	10.2986	10.4532	10.1606	10.681	39.5737	40.5456	37.9267	40.1659	39.6453	40.0314	40.0096	40.7875	39.5262	41.0343	0.519264	10.1297	2.7979	0.0196936	0.0878812	-3.83713	NonSig	4	Multiple-promoter
378	ENSG00000070756	PABPC1	chr8	100717848	-	TRUE	3	FB-PB.4866.12	9.7376	39.5714	10.0676	40.2778	NA	NA	9.60337	9.97076	9.40228	9.95907	9.75252	9.85615	9.99752	10.3816	9.78449	10.3181	39.5737	40.5456	37.9267	40.1659	39.6453	40.0314	40.0096	40.7875	39.5262	41.0343	0.329987	9.90259	1.9189	0.0853797	0.223459	-5.25412	NonSig	4	Multiple-promoter
379	ENSG00000070756	PABPC1	chr8	100718128	-	TRUE	2	FB-PB.4866.11	9.70588	39.5714	10.0207	40.2778	NA	NA	9.65238	9.88854	9.2992	9.91843	9.77086	9.9143	9.88356	10.1494	9.80185	10.3542	39.5737	40.5456	37.9267	40.1659	39.6453	40.0314	40.0096	40.7875	39.5262	41.0343	0.314793	9.86328	1.92638	0.0843454	0.22164	-5.24282	NonSig	4	Multiple-promoter
380	ENSG00000070756	PABPC1	chr8	100722088	-	TRUE	1	FB-PB.4866.1,FB-PB.4866.2,FB-PB.4866.4,FB-PB.4866.10,FB-PB.4866.9,FB-PB.4866.5,FB-PB.4866.6,FB-PB.4866.8,FB-PB.4866.7,FB-PB.4866.14,FB-PB.4866.16,FB-PB.4866.15	10.2579	39.5714	9.80021	40.2778	NA	NA	10.738	10.5789	9.81535	10.1044	10.0528	9.90777	9.82987	9.80325	9.77924	9.68095	39.5737	40.5456	37.9267	40.1659	39.6453	40.0314	40.0096	40.7875	39.5262	41.0343	-0.457692	10.0291	-2.49549	0.0327432	0.120008	-4.33884	NonSig	4	Multiple-promoter
381	ENSG00000070882	OSBPL3	chr7	24980191	-	FALSE	1	FB-PB.4470.1,FB-PB.4470.2	0.296526	0.296526	1.9112	1.9112	Major	Major	0	0	1.48263	0	0	1.6683	2.40969	3.07993	2.3981	0	0	0	1.48263	0	0	1.6683	2.40969	3.07993	2.3981	0	1.61468	1.10386	2.87865	0.0171989	0.0803136	-3.7021	NonSig	1	Single-promoter
382	ENSG00000070950	RAD18	chr3	8963474	-	FALSE	1	FB-PB.3293.1,FB-PB.3293.2	1.52105	1.52105	3.943	3.943	Major	Major	0	3.40377	2.19823	0	2.00325	3.57192	3.42029	4.49963	4.25943	3.96372	0	3.40377	2.19823	0	2.00325	3.57192	3.42029	4.49963	4.25943	3.96372	2.42195	2.73202	3.76544	0.00401108	0.0302802	-2.22604	UpReg	1	Single-promoter
383	ENSG00000071189	SNX13	chr7	17940478	-	FALSE	1	FB-PB.4455.1	4.4083	4.4083	3.55254	3.55254	Major	Major	4.30864	4.89487	4.43547	3.93892	4.46357	3.92216	3.55876	2.80004	3.25432	4.22742	4.30864	4.89487	4.43547	3.93892	4.46357	3.92216	3.55876	2.80004	3.25432	4.22742	-0.855757	3.98042	-3.03311	0.0132845	0.0672223	-3.44332	NonSig	1	Single-promoter
384	ENSG00000071205	ARHGAP10	chr4	147732079	+	FALSE	1	FB-PB.3862.1	5.73359	5.73359	4.33471	4.33471	Major	Major	6.25298	4.7988	5.60158	5.98794	6.02664	4.28662	3.68509	4.79912	4.25943	4.64328	6.25298	4.7988	5.60158	5.98794	6.02664	4.28662	3.68509	4.79912	4.25943	4.64328	-1.39888	5.03415	-4.57173	0.00115668	0.014162	-0.94377	DownReg	1	Single-promoter
385	ENSG00000071242	RPS6KA2	chr6	166419916	-	TRUE	5	FB-PB.4421.7	4.12761	23.0946	2.77439	19.706	NA	NA	4.89108	2.75493	4.1738	4.49218	4.32605	3.10843	1.65846	2.80004	2.66422	3.6408	25.6769	20.5164	23.6093	22.4326	23.238	19.3129	19.29	20.2412	20.6457	19.0401	-1.35322	3.451	-2.97241	0.0147013	0.0719045	-3.54506	NonSig	5	Multiple-promoter
386	ENSG00000071242	RPS6KA2	chr6	166459501	-	TRUE	4	FB-PB.4421.6	5.62775	23.0946	5.0208	19.706	NA	NA	5.7271	5.22566	5.37079	5.78855	6.02664	5.11957	5.31551	5.2863	5.51874	3.8639	25.6769	20.5164	23.6093	22.4326	23.238	19.3129	19.29	20.2412	20.6457	19.0401	-0.606946	5.32428	-1.93088	0.0837278	0.220313	-5.236	NonSig	5	Multiple-promoter
387	ENSG00000071242	RPS6KA2	chr6	166498592	-	TRUE	3	FB-PB.4421.5	4.47134	23.0946	3.70029	19.706	NA	NA	5.33719	4.11206	4.60463	3.83923	4.46357	3.57192	3.55876	4.05806	3.67191	3.6408	25.6769	20.5164	23.6093	22.4326	23.238	19.3129	19.29	20.2412	20.6457	19.0401	-0.771046	4.08581	-2.93558	0.0156351	0.0750431	-3.60677	NonSig	5	Multiple-promoter
388	ENSG00000071242	RPS6KA2	chr6	166531303	-	TRUE	2	FB-PB.4421.4	4.72844	23.0946	4.33632	19.706	NA	NA	4.70536	4.89487	4.80316	4.28044	4.95839	3.69835	4.74855	4.67829	4.17667	4.37975	25.6769	20.5164	23.6093	22.4326	23.238	19.3129	19.29	20.2412	20.6457	19.0401	-0.392121	4.53238	-1.75632	0.111024	0.259852	-5.4949	NonSig	5	Multiple-promoter
389	ENSG00000071242	RPS6KA2	chr6	166627231	-	FALSE	1	FB-PB.4421.1,FB-PB.4421.8	4.13949	23.0946	3.87418	19.706	Minor	Minor	5.01619	3.52883	4.65688	4.03217	3.46337	3.81459	4.00877	3.41852	4.61418	3.51481	25.6769	20.5164	23.6093	22.4326	23.238	19.3129	19.29	20.2412	20.6457	19.0401	-0.265315	4.00683	-0.752526	0.469901	0.649408	-6.65506	NonSig	5	Multiple-promoter
390	ENSG00000071243	ING3	chr7	120950779	+	FALSE	1	FB-PB.4629.1	4.24951	4.24951	4.25771	4.25771	Major	Major	4.65494	4.11206	4.65688	3.73212	4.09154	4.28662	4.19017	3.85003	4.25943	4.70228	4.65494	4.11206	4.65688	3.73212	4.09154	4.28662	4.19017	3.85003	4.25943	4.70228	0.0081951	4.25361	0.0366681	0.971506	0.998918	-6.95544	NonSig	1	Single-promoter
391	ENSG00000071537	SEL1L	chr14	81533851	-	FALSE	1	FB-PB.1667.1,FB-PB.1667.2	6.87306	6.87306	7.13283	7.13283	Major	Major	6.82023	6.92783	6.84493	6.99981	6.77248	7.53197	6.97836	7.10266	6.91397	7.13718	6.82023	6.92783	6.84493	6.99981	6.77248	7.53197	6.97836	7.10266	6.91397	7.13718	0.25977	7.00294	1.90232	0.0877166	0.226101	-5.27912	NonSig	1	Single-promoter
392	ENSG00000071794	HLTF	chr3	149086528	-	FALSE	1	FB-PB.3564.1,FB-PB.3564.2	3.51007	3.51007	3.46879	3.46879	Major	Major	3.18019	3.52883	3.7615	3.61643	3.46337	2.91365	2.67627	3.51577	3.78798	4.45028	3.18019	3.52883	3.7615	3.61643	3.46337	2.91365	2.67627	3.51577	3.78798	4.45028	-0.0412766	3.48943	-0.130937	0.898546	0.957315	-6.9468	NonSig	1	Single-promoter
393	ENSG00000071894	CPSF1	chr8	144409335	-	FALSE	1	FB-PB.4925.1	4.38438	4.38438	4.58628	4.58628	Major	Major	4.54849	4.52623	3.31801	4.94005	4.58912	5.73557	4.00877	3.60687	4.99844	4.58177	4.54849	4.52623	3.31801	4.94005	4.58912	5.73557	4.00877	3.60687	4.99844	4.58177	0.201905	4.48533	0.464842	0.652476	0.796138	-6.8392	NonSig	1	Single-promoter
394	ENSG00000071967	CYBRD1	chr2	171522455	+	FALSE	1	FB-PB.2869.1,FB-PB.2869.2,FB-PB.2869.3	9.31767	9.31767	7.31604	7.31604	Major	Major	9.39067	8.85466	9.55637	9.50389	9.28278	7.45345	7.43016	7.20826	7.68658	6.80171	9.39067	8.85466	9.55637	9.50389	9.28278	7.45345	7.43016	7.20826	7.68658	6.80171	-2.00164	8.31685	-10.0929	2.12065e-06	0.000437301	5.51555	DownReg	1	Single-promoter
395	ENSG00000072041	SLC6A15	chr12	84912794	-	FALSE	1	FB-PB.1267.1	1.24796	1.24796	2.35244	2.35244	Major	Major	0	1.54436	1.88435	0	2.81107	1.6683	2.08243	3.992	1.64871	2.37077	0	1.54436	1.88435	0	2.81107	1.6683	2.08243	3.992	1.64871	2.37077	1.10449	1.8002	1.70926	0.119673	0.2715	-5.56261	NonSig	1	Single-promoter
396	ENSG00000072042	RDH11	chr14	67695770	-	FALSE	1	FB-PB.1632.1,FB-PB.1632.4,FB-PB.1632.6,FB-PB.1632.7	5.59581	5.59581	6.02295	6.02295	Major	Major	5.51733	5.96199	5.43204	5.39102	5.67668	5.82144	6.31693	5.92234	5.76523	6.28883	5.51733	5.96199	5.43204	5.39102	5.67668	5.82144	6.31693	5.92234	5.76523	6.28883	0.427142	5.80938	2.54877	0.0299377	0.114323	-4.25109	NonSig	1	Single-promoter
397	ENSG00000072110	ACTN1	chr14	68890266	-	TRUE	2	FB-PB.1635.10	7.40875	14.6589	8.39922	16.8107	NA	NA	7.51487	7.47038	6.91096	7.29146	7.85607	8.4221	8.16378	8.62448	8.29886	8.4869	15.0084	15.0387	13.6748	14.2203	15.3522	17.0369	16.4818	17.0443	16.5681	16.9226	0.990477	7.90399	5.4727	0.00032146	0.00627747	0.384184	NonSig	2	Multiple-promoter
398	ENSG00000072110	ACTN1	chr14	68979335	-	FALSE	1	FB-PB.1635.1,FB-PB.1635.2,FB-PB.1635.3,FB-PB.1635.4,FB-PB.1635.5,FB-PB.1635.9,FB-PB.1635.7,FB-PB.1635.6,FB-PB.1635.8,FB-PB.1635.11,FB-PB.1635.12	7.25014	14.6589	8.4115	16.8107	Minor	Major	7.49351	7.56833	6.76387	6.92883	7.49616	8.6148	8.31799	8.41984	8.26921	8.43566	15.0084	15.0387	13.6748	14.2203	15.3522	17.0369	16.4818	17.0443	16.5681	16.9226	1.16136	7.83082	6.29507	0.000110318	0.00315492	1.49297	UpReg	2	Multiple-promoter
399	ENSG00000072134	EPN2	chr17	19237410	+	FALSE	1	FB-PB.2126.1	4.36946	4.36946	4.3523	4.3523	Major	Major	3.85205	4.69586	4.80316	4.49218	4.00406	4.20377	4.85989	3.85003	4.08887	4.75895	3.85205	4.69586	4.80316	4.49218	4.00406	4.20377	4.85989	3.85003	4.08887	4.75895	-0.0171613	4.36088	-0.0650884	0.949448	0.988089	-6.95386	NonSig	1	Single-promoter
400	ENSG00000072210	ALDH3A2	chr17	19648752	+	FALSE	1	FB-PB.2131.1,FB-PB.2131.2,FB-PB.2131.4,FB-PB.2131.3	6.46864	6.46864	4.73077	4.73077	Major	Major	6.63755	6.86991	6.44526	6.40893	5.98155	4.7033	4.91249	4.59173	5.30158	4.14476	6.63755	6.86991	6.44526	6.40893	5.98155	4.7033	4.91249	4.59173	5.30158	4.14476	-1.73786	5.5997	-7.34961	3.17501e-05	0.00148091	2.77769	DownReg	1	Single-promoter
401	ENSG00000072274	TFRC	chr3	196055249	-	TRUE	2	FB-PB.3650.3	6.37379	11.3269	6.79563	12.2136	NA	NA	6.73785	6.3988	6.09374	6.52577	6.1128	6.90356	6.48267	7.31344	6.3602	6.91827	11.9758	11.8624	10.4043	11.4169	10.975	12.5478	11.2312	13.5096	11.3096	12.4696	0.421836	6.58471	1.99594	0.0752699	0.206085	-5.13675	NonSig	2	Multiple-promoter
402	ENSG00000072274	TFRC	chr3	196082090	-	FALSE	1	FB-PB.3650.2	4.95307	11.3269	5.41794	12.2136	Minor	Minor	5.23792	5.46358	4.31056	4.89111	4.86217	5.64426	4.74855	6.19615	4.94942	5.55133	11.9758	11.8624	10.4043	11.4169	10.975	12.5478	11.2312	13.5096	11.3096	12.4696	0.464876	5.1855	1.50044	0.165859	0.335456	-5.85068	NonSig	2	Multiple-promoter
403	ENSG00000072310	SREBF1	chr17	17836986	-	FALSE	1	FB-PB.2117.1	4.52925	4.52925	3.99863	3.99863	Major	Major	4.89108	4.6415	4.2438	4.61784	4.25204	4.02226	4.19017	3.992	4.41194	3.37677	4.89108	4.6415	4.2438	4.61784	4.25204	4.02226	4.19017	3.992	4.41194	3.37677	-0.530625	4.26394	-2.48816	0.0331493	0.120691	-4.35089	NonSig	1	Single-promoter
404	ENSG00000072364	AFF4	chr5	132963615	-	FALSE	1	FB-PB.4090.1	8.07558	8.07558	7.61667	7.61667	Major	Major	8.38896	8.40644	7.51688	8.08402	7.9816	7.83007	7.80187	7.50326	7.738	7.21013	8.38896	8.40644	7.51688	8.08402	7.9816	7.83007	7.80187	7.50326	7.738	7.21013	-0.458913	7.84612	-2.26213	0.0484192	0.153431	-4.71818	NonSig	1	Single-promoter
405	ENSG00000072401	UBE2D1	chr10	58334997	+	FALSE	1	FB-PB.647.1	5.25463	5.25463	5.47716	5.47716	Major	Major	5.33719	5.82236	4.43547	5.86659	4.81154	5.28991	5.35406	5.77298	5.55195	5.4169	5.33719	5.82236	4.43547	5.86659	4.81154	5.28991	5.35406	5.77298	5.55195	5.4169	0.22253	5.36589	0.788763	0.449413	0.632472	-6.62629	NonSig	1	Single-promoter
406	ENSG00000072415	PALS1	chr14	67241389	+	FALSE	1	FB-PB.1629.1	4.02978	4.02978	4.32466	4.32466	Major	Major	3.85205	4.52623	4.2438	3.35283	4.17402	4.11587	4.74855	4.18175	3.99538	4.58177	3.85205	4.52623	4.2438	3.35283	4.17402	4.11587	4.74855	4.18175	3.99538	4.58177	0.294879	4.17722	1.21648	0.25305	0.440714	-6.20349	NonSig	1	Single-promoter
407	ENSG00000072501	SMC1A	chrX	53422654	-	FALSE	1	FB-PB.5293.1,FB-PB.5293.2	4.08613	4.08613	5.03353	5.03353	Major	Major	3.31619	3.75048	4.49409	4.61784	4.25204	4.9264	4.96325	5.11065	4.89868	5.26865	3.31619	3.75048	4.49409	4.61784	4.25204	4.9264	4.96325	5.11065	4.89868	5.26865	0.947398	4.55983	3.83144	0.00361107	0.0283098	-2.11824	NonSig	1	Single-promoter
408	ENSG00000072571	HMMR	chr5	163460638	+	FALSE	1	FB-PB.4157.1	0.481054	0.481054	3.42325	3.42325	Major	Major	1.48133	0	0.923938	0	0	3.92216	2.40969	3.77344	3.25432	3.75666	1.48133	0	0.923938	0	0	3.92216	2.40969	3.77344	3.25432	3.75666	2.9422	1.95215	7.56201	2.50935e-05	0.00130683	3.01912	UpReg	1	Single-promoter
409	ENSG00000072609	CHFR	chr12	132887623	-	FALSE	1	FB-PB.1393.1	1.70442	1.70442	2.3182	2.3182	Major	Major	3.66089	0	0.923938	2.34943	1.58785	2.09343	3.09572	1.69453	2.07153	2.63581	3.66089	0	0.923938	2.34943	1.58785	2.09343	3.09572	1.69453	2.07153	2.63581	0.613782	2.01131	0.990404	0.346438	0.536593	-6.44521	NonSig	1	Single-promoter
412	ENSG00000072778	ACADVL	chr17	7219949	+	FALSE	1	FB-PB.2097.1	5.55541	5.55541	6.07142	6.07142	Major	Major	5.62602	5.26215	6.25497	5.45977	5.17414	6.14382	5.93994	5.84959	6.02384	6.39992	5.62602	5.26215	6.25497	5.45977	5.17414	6.14382	5.93994	5.84959	6.02384	6.39992	0.51601	5.81342	2.40605	0.0380506	0.131459	-4.48529	NonSig	1	Single-promoter
413	ENSG00000072786	STK10	chr5	172188224	-	FALSE	1	FB-PB.4163.1	5.27643	5.27643	5.67981	5.67981	Major	Major	5.51733	4.94061	4.80316	5.16261	5.95846	5.79338	5.3916	5.69206	5.70744	5.81459	5.51733	4.94061	4.80316	5.16261	5.95846	5.79338	5.3916	5.69206	5.70744	5.81459	0.403382	5.47812	1.82269	0.0997968	0.244955	-5.39783	NonSig	1	Single-promoter
414	ENSG00000072803	FBXW11	chr5	172006650	-	FALSE	1	FB-PB.4161.1,FB-PB.4161.2,FB-PB.4161.3,FB-PB.4161.4	4.61801	4.61801	4.87	4.87	Major	Major	5.20325	4.18988	4.37437	4.73343	4.58912	4.20377	4.85989	5.17161	4.84609	5.26865	5.20325	4.18988	4.37437	4.73343	4.58912	4.20377	4.85989	5.17161	4.84609	5.26865	0.251992	4.744	1.01363	0.335785	0.527538	-6.42218	NonSig	1	Single-promoter
415	ENSG00000072849	DERL2	chr17	5486189	-	FALSE	1	FB-PB.2094.1	4.84567	4.84567	5.1451	5.1451	Major	Major	4.37244	4.6415	5.30682	4.73343	5.17414	5.28991	4.80529	5.20114	4.84609	5.58307	4.37244	4.6415	5.30682	4.73343	5.17414	5.28991	4.80529	5.20114	4.84609	5.58307	0.299434	4.99539	1.33504	0.212853	0.393933	-6.06225	NonSig	1	Single-promoter
416	ENSG00000072958	AP1M1	chr19	16197912	+	FALSE	1	FB-PB.2482.1,FB-PB.2482.2	2.96804	2.96804	4.08001	4.08001	Major	Major	1.48133	2.75493	3.85393	3.93892	2.81107	4.02226	3.80124	4.18175	4.3377	4.05708	1.48133	2.75493	3.85393	3.93892	2.81107	4.02226	3.80124	4.18175	4.3377	4.05708	1.11197	3.52402	2.60454	0.0272576	0.107332	-4.1589	NonSig	1	Single-promoter
417	ENSG00000073008	PVR	chr19	44643833	+	FALSE	1	FB-PB.2556.1	3.77402	3.77402	3.76819	3.76819	Major	Major	4.24189	4.40093	3.0318	3.73212	3.46337	3.92216	3.26711	3.69256	3.99538	3.96372	4.24189	4.40093	3.0318	3.73212	3.46337	3.92216	3.26711	3.69256	3.99538	3.96372	-0.005838	3.77111	-0.0211813	0.983538	1	-6.95593	NonSig	1	Single-promoter
418	ENSG00000073060	SCARB1	chr12	124863950	-	FALSE	1	FB-PB.1387.3,FB-PB.1387.1,FB-PB.1387.2	5.13057	5.13057	4.49821	4.49821	Major	Major	5.20325	4.89487	4.80316	4.84044	5.91115	4.64169	4.80529	4.18175	4.99844	3.8639	5.20325	4.89487	4.80316	4.84044	5.91115	4.64169	4.80529	4.18175	4.99844	3.8639	-0.63236	4.81439	-2.23483	0.0506764	0.15884	-4.7619	NonSig	1	Single-promoter
419	ENSG00000073111	MCM2	chr3	127598410	+	FALSE	1	FB-PB.3515.1	2.12192	2.12192	4.71719	4.71719	Major	Major	0	2.53402	2.45587	3.61643	2.00325	4.97717	4.27298	5.11065	4.25943	4.96571	0	2.53402	2.45587	3.61643	2.00325	4.97717	4.27298	5.11065	4.25943	4.96571	2.59527	3.41955	4.50798	0.00127198	0.0150289	-1.04213	UpReg	1	Single-promoter
420	ENSG00000073584	SMARCE1	chr17	40647842	-	FALSE	1	FB-PB.2175.1,FB-PB.2175.2	4.22792	4.22792	4.93234	4.93234	Major	Major	3.03003	3.64391	4.97764	4.35453	5.13349	5.20726	4.42556	5.07917	5.13622	4.81348	3.03003	3.64391	4.97764	4.35453	5.13349	5.20726	4.42556	5.07917	5.13622	4.81348	0.704421	4.58013	1.77299	0.1081	0.255913	-5.47069	NonSig	1	Single-promoter
421	ENSG00000073711	PPP2R3A	chr3	135965675	+	FALSE	1	FB-PB.3538.1	2.05914	2.05914	2.093	2.093	Major	Major	0	2.94647	2.6744	2.34943	2.3254	1.06295	2.08243	1.69453	3.25432	2.37077	0	2.94647	2.6744	2.34943	2.3254	1.06295	2.08243	1.69453	3.25432	2.37077	0.0338628	2.07607	0.0570961	0.955647	0.99042	-6.95439	NonSig	1	Single-promoter
422	ENSG00000073712	FERMT2	chr14	52951054	-	FALSE	1	FB-PB.1593.1	6.1261	6.1261	6.42071	6.42071	Major	Major	7.06191	5.29773	5.93353	6.20375	6.13356	6.89037	6.21589	6.10533	6.15932	6.73265	7.06191	5.29773	5.93353	6.20375	6.13356	6.89037	6.21589	6.10533	6.15932	6.73265	0.294615	6.2734	0.945991	0.367503	0.557444	-6.48804	NonSig	1	Single-promoter
423	ENSG00000073792	IGF2BP2	chr3	185658615	-	TRUE	3	FB-PB.3632.5	3.92101	10.6912	4.39159	13.4424	NA	NA	4.02082	4.0298	4.10024	4.28044	3.17378	3.81459	4.74855	4.54641	5.09174	3.75666	7.33701	12.1818	12.0355	11.5909	10.3107	12.5957	13.5059	14.3381	14.086	12.6863	0.470576	4.1563	1.51546	0.162075	0.330219	-5.8307	NonSig	3	Multiple-promoter
424	ENSG00000073792	IGF2BP2	chr3	185689418	-	TRUE	2	FB-PB.3632.10	4.26604	10.6912	4.74596	13.4424	NA	NA	3.31619	4.74825	4.1738	4.28044	4.81154	4.20377	4.74855	5.3404	4.73479	4.70228	7.33701	12.1818	12.0355	11.5909	10.3107	12.5957	13.5059	14.3381	14.086	12.6863	0.479913	4.506	1.55528	0.152408	0.316613	-5.77713	NonSig	3	Multiple-promoter
425	ENSG00000073792	IGF2BP2	chr3	185825035	-	FALSE	1	FB-PB.3632.1,FB-PB.3632.3,FB-PB.3632.2,FB-PB.3632.6,FB-PB.3632.8,FB-PB.3632.11	2.50414	10.6912	4.30484	13.4424	Minor	Minor	0	3.40377	3.7615	3.03005	2.3254	4.57732	4.00877	4.45128	4.25943	4.22742	7.33701	12.1818	12.0355	11.5909	10.3107	12.5957	13.5059	14.3381	14.086	12.6863	1.8007	3.40449	2.87692	0.0172487	0.0803323	-3.70499	NonSig	3	Multiple-promoter
426	ENSG00000073969	NSF	chr17	46590735	+	FALSE	1	FB-PB.5211.1	0.780459	0.780459	1.21513	1.21513	Major	Major	1.88288	0	0	1.01725	1.00217	0	2.90118	0.803701	0	2.37077	1.88288	0	0	1.01725	1.00217	0	2.90118	0.803701	0	2.37077	0.434673	0.997795	0.670538	0.518422	0.689938	-6.71568	NonSig	1	Single-promoter
427	ENSG00000074356	NCBP3	chr17	3846246	-	FALSE	1	FB-PB.2080.1	4.67452	4.67452	5.08185	5.08185	Major	Major	3.85205	5.18823	4.80316	4.94005	4.58912	5.28991	4.96325	5.25847	4.41194	5.48568	3.85205	5.18823	4.80316	4.94005	4.58912	5.28991	4.96325	5.25847	4.41194	5.48568	0.407331	4.87819	1.4373	0.18262	0.35686	-5.93332	NonSig	1	Single-promoter
428	ENSG00000074410	CA12	chr15	63382049	-	FALSE	1	FB-PB.1810.2,FB-PB.1810.1	4.17168	4.17168	4.91005	4.91005	Major	Major	4.6027	5.77264	3.31801	3.83923	3.32583	5.11957	5.0597	4.94593	4.41194	5.01308	4.6027	5.77264	3.31801	3.83923	3.32583	5.11957	5.0597	4.94593	4.41194	5.01308	0.738365	4.54086	1.64395	0.132694	0.287394	-5.65497	NonSig	1	Single-promoter
429	ENSG00000074416	MGLL	chr3	127822514	-	FALSE	2	FB-PB.3517.1	3.87397	8.6008	3.95931	8.20009	Minor	Minor	4.24189	3.52883	4.65688	3.61643	3.32583	4.50995	4.00877	3.41852	4.48255	3.37677	9.47981	8.05506	9.41291	8.40436	7.65188	8.62582	9.15887	7.53975	8.15447	7.52153	0.0853401	3.91664	0.257183	0.802501	0.893746	-6.92009	NonSig	2	Multiple-promoter
430	ENSG00000074416	MGLL	chr3	127823185	-	FALSE	1	FB-PB.3517.2	4.72683	8.6008	4.24078	8.20009	Major	Major	5.23792	4.52623	4.75603	4.78793	4.32605	4.11587	5.1501	4.12123	3.67191	4.14476	9.47981	8.05506	9.41291	8.40436	7.65188	8.62582	9.15887	7.53975	8.15447	7.52153	-0.486054	4.4838	-1.75152	0.111878	0.261383	-5.50184	NonSig	2	Multiple-promoter
431	ENSG00000074527	NTN4	chr12	95790696	-	FALSE	1	FB-PB.1289.1	4.47132	4.47132	3.77719	3.77719	Major	Major	5.86656	3.84972	3.7615	4.11976	4.75906	4.64169	3.90873	2.24119	4.3377	3.75666	5.86656	3.84972	3.7615	4.11976	4.75906	4.64169	3.90873	2.24119	4.3377	3.75666	-0.694127	4.12426	-1.31318	0.219837	0.402331	-6.08899	NonSig	1	Single-promoter
432	ENSG00000074582	BCS1L	chr2	218659723	+	FALSE	1	FB-PB.2965.1	2.73009	2.73009	2.97358	2.97358	Major	Major	2.45422	3.94257	3.4423	0	3.81138	3.10843	2.67627	2.94676	3.08311	3.05334	2.45422	3.94257	3.4423	0	3.81138	3.10843	2.67627	2.94676	3.08311	3.05334	0.243488	2.85184	0.358777	0.727577	0.84536	-6.88617	NonSig	1	Single-promoter
433	ENSG00000074603	DPP8	chr15	65517687	-	FALSE	1	FB-PB.1815.1	3.1772	3.1772	3.73418	3.73418	Major	Major	4.09833	2.94647	3.31801	2.34943	3.17378	4.02226	4.00877	3.07993	3.25432	4.30559	4.09833	2.94647	3.31801	2.34943	3.17378	4.02226	4.00877	3.07993	3.25432	4.30559	0.556972	3.45569	1.58888	0.144649	0.304651	-5.7313	NonSig	1	Single-promoter
434	ENSG00000074695	LMAN1	chr18	59359261	-	FALSE	1	FB-PB.2386.1,FB-PB.2386.2,FB-PB.2386.3	4.6968	4.6968	6.1146	6.1146	Major	Major	3.75963	5.22566	5.16969	4.28044	5.0486	6.27135	5.91437	6.45099	5.44992	6.48638	3.75963	5.22566	5.16969	4.28044	5.0486	6.27135	5.91437	6.45099	5.44992	6.48638	1.4178	5.4057	4.27997	0.00179533	0.018318	-1.39844	UpReg	1	Single-promoter
435	ENSG00000074696	HACD3	chr15	65530480	+	FALSE	1	FB-PB.1816.2	4.84888	4.84888	6.03659	6.03659	Major	Major	4.97568	5.29773	5.01815	4.55638	4.39645	6.35051	5.96506	6.1814	5.92589	5.7601	4.97568	5.29773	5.01815	4.55638	4.39645	6.35051	5.96506	6.1814	5.92589	5.7601	1.18771	5.44274	6.01502	0.000157175	0.00399877	1.12632	UpReg	1	Single-promoter
436	ENSG00000074800	ENO1	chr1	8878690	-	FALSE	1	FB-PB.21.1	8.18614	8.18614	9.37009	9.37009	Major	Major	8.0901	8.52378	7.89955	8.07308	8.34417	9.61496	9.21199	9.48683	9.11402	9.42266	8.0901	8.52378	7.89955	8.07308	8.34417	9.61496	9.21199	9.48683	9.11402	9.42266	1.18395	8.77811	7.52722	2.60709e-05	0.00130683	2.97994	UpReg	1	Single-promoter
438	ENSG00000075223	SEMA3C	chr7	80919051	-	FALSE	1	FB-PB.4555.1	7.32202	7.32202	7.1433	7.1433	Major	Major	7.24349	7.59718	7.32838	6.86689	7.57417	7.17767	7.1193	7.60068	6.96418	6.85468	7.24349	7.59718	7.32838	6.86689	7.57417	7.17767	7.1193	7.60068	6.96418	6.85468	-0.178717	7.23266	-0.941661	0.369606	0.559384	-6.49213	NonSig	1	Single-promoter
439	ENSG00000075415	SLC25A3	chr12	98593650	+	FALSE	1	FB-PB.1296.1	6.60042	6.60042	6.9722	6.9722	Major	Major	7.13731	6.41509	6.22067	6.81535	6.41368	6.75143	7.13045	7.08692	6.90114	6.99105	7.13731	6.41509	6.22067	6.81535	6.41368	6.75143	7.13045	7.08692	6.90114	6.99105	0.371781	6.78631	2.00468	0.074197	0.204146	-5.12332	NonSig	1	Single-promoter
440	ENSG00000075420	FNDC3B	chr3	172039578	+	FALSE	1	FB-PB.3604.1,FB-PB.3604.2,FB-PB.3604.3,FB-PB.3604.4	5.92536	8.42206	5.9094	9.72753	Major	Major	6.18354	6.02704	5.86855	5.78855	5.75914	5.79338	5.59841	6.1814	5.84779	6.126	9.21357	6.02704	9.96878	8.13798	8.76294	9.3653	9.2835	10.3632	9.63577	9.9899	-0.0159666	5.91738	-0.10597	0.917801	0.969519	-6.95003	NonSig	2	Multiple-promoter
441	ENSG00000075420	FNDC3B	chr3	172040531	+	FALSE	2	FB-PB.3604.5,FB-PB.3604.6	2.4967	8.42206	3.81813	9.72753	Minor	Minor	3.03003	0	4.10024	2.34943	3.00379	3.57192	3.68509	4.18175	3.78798	3.8639	9.21357	6.02704	9.96878	8.13798	8.76294	9.3653	9.2835	10.3632	9.63577	9.9899	1.32143	3.15741	2.06521	0.0671564	0.18984	-5.02963	NonSig	2	Multiple-promoter
442	ENSG00000075539	FRYL	chr4	48780286	-	FALSE	1	FB-PB.3717.1	4.39561	4.39561	3.81529	3.81529	Major	Major	5.01619	4.0298	3.85393	4.11976	4.95839	2.68841	4.27298	4.18175	4.17667	3.75666	5.01619	4.0298	3.85393	4.11976	4.95839	2.68841	4.27298	4.18175	4.17667	3.75666	-0.580322	4.10545	-1.60099	0.14194	0.301421	-5.71464	NonSig	1	Single-promoter
443	ENSG00000075651	PLD1	chr3	171810568	-	FALSE	1	FB-PB.3600.1	3.97102	3.97102	4.34128	4.34128	Major	Major	4.89108	4.0298	2.6744	3.73212	4.52771	4.11587	4.35129	4.45128	4.3377	4.45028	4.89108	4.0298	2.6744	3.73212	4.52771	4.11587	4.35129	4.45128	4.3377	4.45028	0.370262	4.15615	1.0182	0.333717	0.525524	-6.41759	NonSig	1	Single-promoter
444	ENSG00000075790	BCAP29	chr7	107580215	+	FALSE	1	FB-PB.4610.1,FB-PB.4610.2,FB-PB.4610.3,FB-PB.4610.4	2.67456	2.67456	3.9935	3.9935	Major	Major	2.8624	3.11553	2.45587	2.6136	2.3254	2.91365	3.80124	4.34943	4.67574	4.22742	2.8624	3.11553	2.45587	2.6136	2.3254	2.91365	3.80124	4.34943	4.67574	4.22742	1.31894	3.33403	4.12894	0.00226474	0.021097	-1.63815	UpReg	1	Single-promoter
445	ENSG00000075856	SART3	chr12	108561172	-	FALSE	1	FB-PB.1324.1,FB-PB.1324.2	5.04165	5.04165	4.89043	4.89043	Major	Major	5.9733	5.06973	4.60463	4.55638	5.0042	4.9264	4.35129	4.49963	5.09174	5.58307	5.9733	5.06973	4.60463	4.55638	5.0042	4.9264	4.35129	4.49963	5.09174	5.58307	-0.151222	4.96604	-0.472576	0.647144	0.79309	-6.83532	NonSig	1	Single-promoter
446	ENSG00000075945	KIFAP3	chr1	170074652	-	FALSE	1	FB-PB.400.2,FB-PB.400.1	3.56161	3.56161	4.89695	4.89695	Major	Major	2.6727	3.40377	4.1738	3.03005	4.52771	5.02622	4.96325	5.047	4.48255	4.96571	2.6727	3.40377	4.1738	3.03005	4.52771	5.02622	4.96325	5.047	4.48255	4.96571	1.33534	4.22928	3.89271	0.00327715	0.0270313	-2.01857	UpReg	1	Single-promoter
447	ENSG00000075975	MKRN2	chr3	12557076	+	FALSE	1	FB-PB.3306.1,FB-PB.3306.2	4.84183	4.84183	4.35188	4.35188	Major	Major	4.70536	4.94061	5.01815	4.84044	4.70461	4.28662	4.00877	4.05806	4.25943	5.14651	4.70536	4.94061	5.01815	4.84044	4.70461	4.28662	4.00877	4.05806	4.25943	5.14651	-0.489955	4.59686	-2.27443	0.0474349	0.151632	-4.69843	NonSig	1	Single-promoter
448	ENSG00000076003	MCM6	chr2	135876429	-	FALSE	1	FB-PB.2832.1,FB-PB.2832.2	4.69269	4.69269	6.16811	6.16811	Major	Major	5.16773	4.52623	5.40174	4.55638	3.81138	6.1876	5.86183	6.6354	5.84779	6.30795	5.16773	4.52623	5.40174	4.55638	3.81138	6.1876	5.86183	6.6354	5.84779	6.30795	1.47542	5.4304	4.89521	0.000720642	0.0103424	-0.453441	UpReg	1	Single-promoter
449	ENSG00000076043	REXO2	chr11	114439467	+	FALSE	1	FB-PB.1042.1	5.85097	5.85097	5.75409	5.75409	Major	Major	5.9733	5.52492	6.369	5.52539	5.86224	5.47794	5.83483	6.05768	5.34012	6.05987	5.9733	5.52492	6.369	5.52539	5.86224	5.47794	5.83483	6.05768	5.34012	6.05987	-0.0968826	5.80253	-0.447929	0.664207	0.803447	-6.84747	NonSig	1	Single-promoter
450	ENSG00000076053	RBM7	chr11	114400668	+	FALSE	1	FB-PB.1040.1	4.81388	4.81388	4.64986	4.64986	Major	Major	4.24189	5.33246	4.43547	4.73343	5.32616	4.50995	5.1501	4.94593	4.3377	4.30559	4.24189	5.33246	4.43547	4.73343	5.32616	4.50995	5.1501	4.94593	4.3377	4.30559	-0.164025	4.73187	-0.603463	0.560278	0.72518	-6.76053	NonSig	1	Single-promoter
451	ENSG00000076108	BAZ2A	chr12	56636376	-	FALSE	1	FB-PB.1208.1	3.86431	3.86431	2.56816	2.56816	Major	Major	4.89108	3.40377	3.31801	4.11976	3.58894	2.91365	2.40969	1.9936	2.66422	2.85963	4.89108	3.40377	3.31801	4.11976	3.58894	2.91365	2.40969	1.9936	2.66422	2.85963	-1.29616	3.21623	-4.03975	0.00260152	0.0234316	-1.78103	DownReg	1	Single-promoter
452	ENSG00000076201	PTPN23	chr3	47381011	+	FALSE	1	FB-PB.3389.1	2.68055	2.68055	3.67248	3.67248	Major	Major	3.31619	2.27306	3.0318	1.60792	3.17378	4.11587	3.80124	3.69256	2.88882	3.8639	3.31619	2.27306	3.0318	1.60792	3.17378	4.11587	3.80124	3.69256	2.88882	3.8639	0.991926	3.17651	2.73706	0.0218127	0.0935667	-3.93866	NonSig	1	Single-promoter
453	ENSG00000076242	MLH1	chr3	36993773	+	FALSE	1	FB-PB.3359.1	3.50556	3.50556	3.63111	3.63111	Major	Major	3.18019	3.52883	3.7615	3.35283	3.70444	4.20377	4.10232	3.20184	3.78798	2.85963	3.18019	3.52883	3.7615	3.35283	3.70444	4.20377	4.10232	3.20184	3.78798	2.85963	0.125548	3.56833	0.460962	0.655158	0.798085	-6.84112	NonSig	1	Single-promoter
454	ENSG00000076321	KLHL20	chr1	173714937	+	TRUE	1	FB-PB.404.1,FB-PB.404.2,FB-PB.404.3,FB-PB.404.4,FB-PB.404.5	4.15964	4.15964	3.6671	3.6671	NA	NA	3.18019	4.33395	4.75603	3.93892	4.58912	4.02226	3.42029	3.77344	3.8954	3.2241	3.18019	4.33395	4.75603	3.93892	4.58912	4.02226	3.42029	3.77344	3.8954	3.2241	-0.492543	3.91337	-1.6196	0.137867	0.295051	-5.6889	NonSig	1	Single-promoter
455	ENSG00000076382	SPAG5	chr17	28599039	-	FALSE	1	FB-PB.2140.1,FB-PB.2140.2	2.72822	2.72822	4.93716	4.93716	Major	Major	3.18019	2.94647	2.6744	2.8368	2.00325	5.02622	4.19017	5.17161	4.84609	5.4517	3.18019	2.94647	2.6744	2.8368	2.00325	5.02622	4.19017	5.17161	4.84609	5.4517	2.20894	3.83269	7.89609	1.75015e-05	0.00108583	3.38785	UpReg	1	Single-promoter
456	ENSG00000076513	ANKRD13A	chr12	109999433	+	FALSE	1	FB-PB.1335.1	4.81761	4.81761	4.94809	4.94809	Major	Major	4.65494	4.94061	4.89303	4.78793	4.81154	5.51277	4.42556	5.20114	4.89868	4.70228	4.65494	4.94061	4.89303	4.78793	4.81154	5.51277	4.42556	5.20114	4.89868	4.70228	0.130479	4.88285	0.65476	0.528096	0.6976	-6.72662	NonSig	1	Single-promoter
457	ENSG00000076650	GPATCH1	chr19	33081179	+	FALSE	1	FB-PB.2515.1	1.75485	1.75485	2.38384	2.38384	Major	Major	0	2.27306	1.88435	2.6136	2.00325	3.43334	2.08243	1.69453	3.08311	1.62578	0	2.27306	1.88435	2.6136	2.00325	3.43334	2.08243	1.69453	3.08311	1.62578	0.628986	2.06935	1.15468	0.276334	0.467481	-6.27332	NonSig	1	Single-promoter
458	ENSG00000076685	NT5C2	chr10	103193308	-	FALSE	1	FB-PB.763.1,FB-PB.763.2	4.60349	4.60349	5.04042	5.04042	Major	Major	4.49216	4.84763	4.60463	4.425	4.64802	5.24918	5.53271	4.7197	4.73479	4.96571	4.49216	4.84763	4.60463	4.425	4.64802	5.24918	5.53271	4.7197	4.73479	4.96571	0.43693	4.82195	2.4259	0.036804	0.128519	-4.4529	NonSig	1	Single-promoter
459	ENSG00000076928	ARHGEF1	chr19	41883197	+	FALSE	1	FB-PB.2548.1	2.79965	2.79965	3.37735	3.37735	Major	Major	2.19665	2.27306	2.86414	3.49064	3.17378	3.10843	2.67627	3.20184	4.25943	3.6408	2.19665	2.27306	2.86414	3.49064	3.17378	3.10843	2.67627	3.20184	4.25943	3.6408	0.577698	3.0885	1.66092	0.129194	0.282469	-5.63117	NonSig	1	Single-promoter
460	ENSG00000076984	MAP2K7	chr19	7903875	+	FALSE	1	FB-PB.2446.1,FB-PB.2446.2,FB-PB.2446.4	4.54911	4.54911	3.72544	3.72544	Major	Major	4.97568	4.84763	4.55042	4.11976	4.25204	4.28662	3.90873	3.20184	4.17667	3.05334	4.97568	4.84763	4.55042	4.11976	4.25204	4.28662	3.90873	3.20184	4.17667	3.05334	-0.823666	4.13727	-2.84283	0.0182634	0.0836912	-3.76203	NonSig	1	Single-promoter
461	ENSG00000077097	TOP2B	chr3	25664913	-	FALSE	1	FB-PB.3333.1	5.39563	5.39563	5.56911	5.56911	Major	Major	5.39977	4.98495	5.75328	5.28133	5.55883	5.67534	5.53271	5.23009	5.79328	5.61413	5.39977	4.98495	5.75328	5.28133	5.55883	5.67534	5.53271	5.23009	5.79328	5.61413	0.173479	5.48237	1.0154	0.334981	0.526879	-6.4204	NonSig	1	Single-promoter
462	ENSG00000077232	DNAJC10	chr2	182716243	+	FALSE	1	FB-PB.2896.1,FB-PB.2896.2,FB-PB.2896.5,FB-PB.2896.3,FB-PB.2896.4,FB-PB.2896.7,FB-PB.2896.6	5.44536	5.44536	6.04203	6.04203	Major	Major	4.80121	5.26215	5.67943	5.98794	5.49609	5.64426	6.0845	6.2395	6.13761	6.1043	4.80121	5.26215	5.67943	5.98794	5.49609	5.64426	6.0845	6.2395	6.13761	6.1043	0.59667	5.7437	2.66842	0.0244809	0.100647	-4.05292	NonSig	1	Single-promoter
463	ENSG00000077235	GTF3C1	chr16	27549909	-	FALSE	1	FB-PB.1956.1,FB-PB.1956.2,FB-PB.1956.3	6.3372	6.3372	6.28144	6.28144	Major	Major	6.55746	6.16831	6.01586	6.69217	6.25221	6.59768	5.98975	6.30898	6.09317	6.41763	6.55746	6.16831	6.01586	6.69217	6.25221	6.59768	5.98975	6.30898	6.09317	6.41763	-0.0557586	6.30932	-0.317966	0.757363	0.865607	-6.90111	NonSig	1	Single-promoter
464	ENSG00000077238	IL4R	chr16	27313909	+	FALSE	1	FB-PB.1957.1	3.09785	3.09785	2.1318	2.1318	Major	Major	3.18019	3.11553	3.18199	3.20045	2.81107	2.09343	1.05547	2.80004	2.66422	2.04584	3.18019	3.11553	3.18199	3.20045	2.81107	2.09343	1.05547	2.80004	2.66422	2.04584	-0.966046	2.61482	-3.19181	0.0102047	0.0556078	-3.17743	NonSig	1	Single-promoter
465	ENSG00000077254	USP33	chr1	77759850	-	FALSE	1	FB-PB.207.3,FB-PB.207.2,FB-PB.207.1,FB-PB.207.4,FB-PB.207.5,FB-PB.207.7,FB-PB.207.6,FB-PB.207.8,FB-PB.207.9	5.2485	5.2485	5.05696	5.05696	Major	Major	5.62602	5.22566	5.09591	5.12076	5.17414	5.11957	5.3916	4.98041	4.41194	5.38124	5.62602	5.22566	5.09591	5.12076	5.17414	5.11957	5.3916	4.98041	4.41194	5.38124	-0.191543	5.15273	-0.930198	0.375214	0.562855	-6.50288	NonSig	1	Single-promoter
466	ENSG00000077380	DYNC1I2	chr2	171687475	+	FALSE	1	FB-PB.2871.1	5.30689	11.0069	5.58403	11.7603	Minor	Minor	5.20325	4.98495	5.43204	5.35537	5.55883	5.58002	5.59841	5.25847	5.61617	5.8671	10.8029	10.2827	11.4874	11.1704	11.291	12.0056	11.7932	11.2501	11.6161	12.1365	0.277143	5.44546	1.80342	0.102943	0.249038	-5.42618	NonSig	2	Multiple-promoter
467	ENSG00000077380	DYNC1I2	chr2	171687733	+	FALSE	2	FB-PB.2871.2	5.69998	11.0069	6.17628	11.7603	Major	Major	5.59961	5.29773	6.05533	5.81504	5.73217	6.42556	6.19481	5.99159	5.99997	6.26945	10.8029	10.2827	11.4874	11.1704	11.291	12.0056	11.7932	11.2501	11.6161	12.1365	0.4763	5.93813	2.93338	0.0156928	0.0751395	-3.61046	NonSig	2	Multiple-promoter
468	ENSG00000077549	CAPZB	chr1	19452190	-	FALSE	2	FB-PB.49.2	0.20345	6.91462	1.50178	8.60186	Inactive	Minor	0	0	0	1.01725	0	2.42137	0	1.9936	1.04808	2.04584	7.00266	6.4312	6.85615	7.51059	6.77248	9.49789	6.97836	9.14247	8.54302	8.84756	1.29833	0.852614	2.87796	0.0172188	0.0803136	-3.70326	NonSig	2	Multiple-promoter
469	ENSG00000077549	CAPZB	chr1	19485497	-	FALSE	1	FB-PB.49.1	6.71117	6.91462	7.10008	8.60186	Major	Major	7.00266	6.4312	6.85615	6.49334	6.77248	7.07652	6.97836	7.14887	7.49494	6.80171	7.00266	6.4312	6.85615	7.51059	6.77248	9.49789	6.97836	9.14247	8.54302	8.84756	0.388911	6.90562	2.30613	0.0449862	0.146758	-4.64739	NonSig	2	Multiple-promoter
470	ENSG00000077684	JADE1	chr4	128809795	+	FALSE	1	FB-PB.3840.1	3.79049	3.99394	2.61184	2.82294	Major	Major	4.75408	3.52883	4.2438	2.8368	3.58894	2.68841	3.09572	2.24119	2.3981	2.63581	4.75408	3.52883	4.2438	3.85405	3.58894	2.68841	4.15119	2.24119	2.3981	2.63581	-1.17865	3.20117	-3.46669	0.00649521	0.0414467	-2.71883	DownReg	2	Multiple-promoter
471	ENSG00000077684	JADE1	chr4	128811298	+	FALSE	2	FB-PB.3840.2	0.20345	3.99394	0.211094	2.82294	Inactive	Inactive	0	0	0	1.01725	0	0	1.05547	0	0	0	4.75408	3.52883	4.2438	3.85405	3.58894	2.68841	4.15119	2.24119	2.3981	2.63581	0.00764465	0.207272	0.0270886	0.978947	1	-6.95577	NonSig	2	Multiple-promoter
472	ENSG00000077713	SLC25A43	chrX	119399349	+	FALSE	1	FB-PB.5360.1	4.00645	4.00645	3.80084	3.80084	Major	Major	4.02082	3.64391	4.2438	4.03217	4.09154	2.42137	3.90873	4.45128	3.99538	4.22742	4.02082	3.64391	4.2438	4.03217	4.09154	2.42137	3.90873	4.45128	3.99538	4.22742	-0.205613	3.90364	-0.586219	0.57134	0.732569	-6.77136	NonSig	1	Single-promoter
473	ENSG00000077782	FGFR1	chr8	38468635	-	FALSE	1	FB-PB.4776.1,FB-PB.4776.2,FB-PB.4776.3	6.08653	6.08653	5.09952	5.09952	Major	Major	5.39977	6.14895	6.27183	6.54172	6.07036	4.64169	5.35406	5.14145	5.09174	5.26865	5.39977	6.14895	6.27183	6.54172	6.07036	4.64169	5.35406	5.14145	5.09174	5.26865	-0.98701	5.59302	-4.39593	0.00150531	0.0164743	-1.21636	NonSig	1	Single-promoter
474	ENSG00000078043	PIAS2	chr18	46917514	-	FALSE	1	FB-PB.2367.1,FB-PB.2367.2,FB-PB.2367.3,FB-PB.2367.4	5.05231	5.05231	4.14881	4.14881	Major	Major	5.65196	4.98495	4.10024	5.16261	5.36178	4.02226	4.19017	3.992	4.48255	4.05708	5.65196	4.98495	4.10024	5.16261	5.36178	4.02226	4.19017	3.992	4.48255	4.05708	-0.903495	4.60056	-3.36343	0.00769007	0.0460523	-2.89066	NonSig	1	Single-promoter
475	ENSG00000078098	FAP	chr2	162243445	-	FALSE	1	FB-PB.2862.1,FB-PB.2862.2,FB-PB.2862.3	5.73567	5.73567	7.52018	7.52018	Major	Major	5.09395	5.52492	5.89054	6.14233	6.02664	7.4263	7.55123	7.95294	6.75191	7.91853	5.09395	5.52492	5.89054	6.14233	6.02664	7.4263	7.55123	7.95294	6.75191	7.91853	1.78451	6.62793	6.3959	9.73578e-05	0.00301416	1.62229	UpReg	1	Single-promoter
476	ENSG00000078124	ACER3	chr11	76860934	+	FALSE	1	FB-PB.994.1	4.27764	4.27764	4.25584	4.25584	Major	Major	4.65494	4.26371	3.94079	4.61784	3.91094	4.02226	3.90873	4.34943	3.8954	5.10339	4.65494	4.26371	3.94079	4.61784	3.91094	4.02226	3.90873	4.34943	3.8954	5.10339	-0.0218005	4.26674	-0.0812114	0.936953	0.981808	-6.95257	NonSig	1	Single-promoter
477	ENSG00000078140	UBE2K	chr4	39698125	+	FALSE	1	FB-PB.3706.2,FB-PB.3706.1	5.18521	5.18521	6.12036	6.12036	Major	Major	4.43354	5.58376	5.46172	5.35537	5.09167	5.95409	6.21589	6.05768	6.04732	6.32682	4.43354	5.58376	5.46172	5.35537	5.09167	5.95409	6.21589	6.05768	6.04732	6.32682	0.935145	5.65279	4.34091	0.00163617	0.0173257	-1.30253	NonSig	1	Single-promoter
478	ENSG00000078142	PIK3C3	chr18	41955187	+	FALSE	1	FB-PB.2365.1,FB-PB.2365.2	4.04722	4.04722	3.90966	3.90966	Major	Major	4.02082	3.84972	4.65688	4.11976	3.58894	4.81916	3.26711	4.54641	2.3981	4.51753	4.02082	3.84972	4.65688	4.11976	3.58894	4.81916	3.26711	4.54641	2.3981	4.51753	-0.137561	3.97844	-0.297247	0.772651	0.873916	-6.90802	NonSig	1	Single-promoter
479	ENSG00000078246	TULP3	chr12	2890896	+	FALSE	1	FB-PB.1093.1,FB-PB.1093.2	3.96896	8.58418	3.95507	8.36809	Minor	Minor	3.44047	3.84972	4.10024	4.20234	4.25204	3.57192	4.27298	4.29567	3.40734	4.22742	7.98895	9.49002	8.34404	8.14126	8.95664	8.08187	8.28175	9.52577	7.49621	8.45483	-0.0138911	3.96201	-0.0580939	0.954873	0.989995	-6.95433	NonSig	2	Multiple-promoter
480	ENSG00000078246	TULP3	chr12	2931119	+	TRUE	2	FB-PB.1093.3	4.61522	8.58418	4.41302	8.36809	NA	NA	4.54849	5.6403	4.2438	3.93892	4.70461	4.50995	4.00877	5.23009	4.08887	4.22742	7.98895	9.49002	8.34404	8.14126	8.95664	8.08187	8.28175	9.52577	7.49621	8.45483	-0.202204	4.51412	-0.588128	0.57011	0.732569	-6.77018	NonSig	2	Multiple-promoter
481	ENSG00000078269	SYNJ2	chr6	157981807	+	FALSE	1	FB-PB.4413.1	4.72995	4.72995	4.5478	4.5478	Major	Major	6.01387	4.69586	4.60463	3.93892	4.39645	4.76239	4.74855	3.85003	4.67574	4.70228	6.01387	4.69586	4.60463	3.93892	4.39645	4.76239	4.74855	3.85003	4.67574	4.70228	-0.182149	4.63887	-0.497544	0.630076	0.780658	-6.82238	NonSig	1	Single-promoter
482	ENSG00000078304	PPP2R5C	chr14	101809803	+	FALSE	1	FB-PB.1696.1,FB-PB.1696.2,FB-PB.1696.3	7.07648	7.07648	7.22155	7.22155	Major	Major	6.96177	6.61169	7.02469	7.48531	7.29893	7.17767	6.97836	7.51507	7.03637	7.40029	6.96177	6.61169	7.02469	7.48531	7.29893	7.17767	6.97836	7.51507	7.03637	7.40029	0.145072	7.14901	0.772078	0.458772	0.640253	-6.63968	NonSig	1	Single-promoter
483	ENSG00000078369	GNB1	chr1	1817853	-	TRUE	2	FB-PB.9.1	8.67132	14.8587	9.02104	15.0524	NA	NA	8.67171	8.65305	8.67689	8.69242	8.66254	8.94956	9.00954	9.25474	9.0073	8.88404	15.007	14.5927	14.9654	14.9742	14.7543	14.5621	15.1168	15.3444	15.1449	15.0938	0.349713	8.84618	3.35191	0.00783691	0.0465227	-2.90988	NonSig	2	Multiple-promoter
484	ENSG00000078369	GNB1	chr1	1890852	-	FALSE	1	FB-PB.9.2	6.18739	14.8587	6.03134	15.0524	Minor	Minor	6.33533	5.93963	6.28848	6.28178	6.09173	5.6125	6.10725	6.08962	6.13761	6.20971	15.007	14.5927	14.9654	14.9742	14.7543	14.5621	15.1168	15.3444	15.1449	15.0938	-0.156055	6.10936	-1.05765	0.31627	0.508889	-6.37735	NonSig	2	Multiple-promoter
485	ENSG00000078618	NRDC	chr1	51878748	-	FALSE	1	FB-PB.149.1,FB-PB.149.2,FB-PB.149.4,FB-PB.149.3,FB-PB.149.5	6.31891	6.31891	6.82774	6.82774	Major	Major	6.63755	6.59749	6.46004	5.96448	5.935	6.75143	6.46516	6.82759	7.00073	7.09377	6.63755	6.59749	6.46004	5.96448	5.935	6.75143	6.46516	6.82759	7.00073	7.09377	0.508828	6.57332	2.63381	0.0259479	0.104164	-4.11038	NonSig	1	Single-promoter
486	ENSG00000078674	PCM1	chr8	17922834	+	FALSE	1	FB-PB.4727.1	5.88873	5.88873	5.18113	5.18113	Major	Major	5.7751	6.02704	6.03573	5.55712	6.04866	5.51277	4.96325	5.3136	4.73479	5.38124	5.7751	6.02704	6.03573	5.55712	6.04866	5.51277	4.96325	5.3136	4.73479	5.38124	-0.707598	5.53493	-3.90393	0.00321959	0.0267604	-2.00036	NonSig	1	Single-promoter
487	ENSG00000078747	ITCH	chr20	34363276	+	FALSE	1	FB-PB.3067.1	4.9625	4.9625	5.34579	5.34579	Major	Major	4.37244	4.6415	5.33916	4.84044	5.61896	5.64426	5.3916	5.14145	4.79152	5.7601	4.37244	4.6415	5.33916	4.84044	5.61896	5.64426	5.3916	5.14145	4.79152	5.7601	0.383285	5.15414	1.38328	0.198102	0.376019	-6.00222	NonSig	1	Single-promoter
488	ENSG00000078902	TOLLIP	chr11	1309632	-	FALSE	1	FB-PB.820.1	4.39305	4.39305	4.02313	4.02313	Major	Major	4.02082	4.18988	5.13327	4.03217	4.58912	4.36497	4.27298	3.20184	4.41194	3.8639	4.02082	4.18988	5.13327	4.03217	4.58912	4.36497	4.27298	3.20184	4.41194	3.8639	-0.369926	4.20809	-1.24452	0.243022	0.42862	-6.17093	NonSig	1	Single-promoter
489	ENSG00000079102	RUNX1T1	chr8	92062824	-	FALSE	1	FB-PB.4843.2,FB-PB.4843.1	4.81401	4.81401	3.63971	3.63971	Major	Major	5.59961	4.33395	4.70731	4.425	5.0042	2.91365	4.00877	2.63669	4.67574	3.96372	5.59961	4.33395	4.70731	4.425	5.0042	2.91365	4.00877	2.63669	4.67574	3.96372	-1.1743	4.22686	-2.8408	0.0183258	0.0838009	-3.76543	NonSig	1	Single-promoter
490	ENSG00000079150	FKBP7	chr2	178478598	-	FALSE	1	FB-PB.2890.1	5.81826	5.81826	5.98822	5.98822	Major	Major	5.5727	4.98495	6.54567	6.46017	5.5278	6.09868	5.91437	6.51119	5.99997	5.4169	5.5727	4.98495	6.54567	6.46017	5.5278	6.09868	5.91437	6.51119	5.99997	5.4169	0.169965	5.90324	0.51691	0.616992	0.769375	-6.81191	NonSig	1	Single-promoter
491	ENSG00000079156	OSBPL6	chr2	178194506	+	FALSE	1	FB-PB.2889.1	0.589293	0.589293	1.07837	1.07837	Major	Major	0	2.94647	0	0	0	0	0	1.69453	2.07153	1.62578	0	2.94647	0	0	0	0	0	1.69453	2.07153	1.62578	0.489075	0.833831	0.716255	0.491	0.667732	-6.68265	NonSig	1	Single-promoter
492	ENSG00000079246	XRCC5	chr2	216109390	+	FALSE	1	FB-PB.2957.1,FB-PB.2957.2	6.32892	6.32892	6.7314	6.7314	Major	Major	6.73785	5.74713	6.65247	6.01104	6.49614	6.79454	6.80832	6.83702	6.41539	6.80171	6.73785	5.74713	6.65247	6.01104	6.49614	6.79454	6.80832	6.83702	6.41539	6.80171	0.402472	6.53016	1.92236	0.0848997	0.222947	-5.24889	NonSig	1	Single-promoter
493	ENSG00000079785	DDX1	chr2	15591838	+	FALSE	1	FB-PB.2627.1	4.28858	4.28858	5.55251	5.55251	Major	Major	3.44047	4.52623	4.31056	4.03217	5.13349	5.24918	5.3916	5.75317	5.17937	6.18924	3.44047	4.52623	4.31056	4.03217	5.13349	5.24918	5.3916	5.75317	5.17937	6.18924	1.26393	4.92055	3.95217	0.00298401	0.025416	-1.92222	UpReg	1	Single-promoter
494	ENSG00000079805	DNM2	chr19	10718091	+	FALSE	1	FB-PB.2458.1	5.62534	5.62534	5.83816	5.83816	Major	Major	4.97568	5.74713	5.86855	5.91636	5.61896	5.58002	6.06139	5.53854	5.951	6.05987	4.97568	5.74713	5.86855	5.91636	5.61896	5.58002	6.06139	5.53854	5.951	6.05987	0.212829	5.73175	1.02461	0.330835	0.522455	-6.41114	NonSig	1	Single-promoter
495	ENSG00000079819	EPB41L2	chr6	131063245	-	FALSE	1	FB-PB.4363.1	5.23391	5.23391	5.82236	5.82236	Major	Major	4.24189	5.06973	4.97764	5.78855	6.09173	5.6125	5.23517	6.1665	5.84779	6.24981	4.24189	5.06973	4.97764	5.78855	6.09173	5.6125	5.23517	6.1665	5.84779	6.24981	0.588448	5.52813	1.6615	0.129075	0.282365	-5.63034	NonSig	1	Single-promoter
496	ENSG00000079931	MOXD1	chr6	132401482	-	FALSE	1	FB-PB.4366.1	4.83201	4.83201	4.36444	4.36444	Major	Major	5.99373	5.33246	4.80316	4.11976	3.91094	4.11587	5.10561	4.23984	4.84609	3.51481	5.99373	5.33246	4.80316	4.11976	3.91094	4.11587	5.10561	4.23984	4.84609	3.51481	-0.467564	4.59823	-1.05122	0.319065	0.511745	-6.38399	NonSig	1	Single-promoter
497	ENSG00000079950	STX7	chr6	132513116	-	FALSE	1	FB-PB.4367.1,FB-PB.4367.2,FB-PB.4367.3	4.11929	4.11929	3.33498	3.33498	Major	Major	4.54849	3.84972	3.7615	3.73212	4.70461	3.57192	3.09572	2.94676	3.54569	3.51481	4.54849	3.84972	3.7615	3.73212	4.70461	3.57192	3.09572	2.94676	3.54569	3.51481	-0.784307	3.72713	-3.23894	0.0094395	0.0523111	-3.09857	NonSig	1	Single-promoter
498	ENSG00000080200	CRYBG3	chr3	97821990	+	FALSE	1	FB-PB.3456.1	5.74989	5.74989	4.67271	4.67271	Major	Major	6.35126	5.4319	5.70447	5.55712	5.70469	4.50995	4.56355	4.49963	5.34012	4.45028	6.35126	5.4319	5.70447	5.55712	5.70469	4.50995	4.56355	4.49963	5.34012	4.45028	-1.07718	5.2113	-4.7099	0.00094327	0.0124018	-0.732516	DownReg	1	Single-promoter
499	ENSG00000080345	RIF1	chr2	151409922	+	FALSE	1	FB-PB.2847.1	5.05234	5.05234	5.00441	5.00441	Major	Major	3.44047	5.29773	5.70447	5.35537	5.46367	4.7033	5.01228	4.94593	5.30158	5.05894	3.44047	5.29773	5.70447	5.35537	5.46367	4.7033	5.01228	4.94593	5.30158	5.05894	-0.0479353	5.02838	-0.121521	0.9058	0.961642	-6.9481	NonSig	1	Single-promoter
501	ENSG00000080546	SESN1	chr6	109094841	-	FALSE	1	FB-PB.4335.1	3.93167	3.93167	3.72016	3.72016	Major	Major	3.66089	4.0298	3.85393	4.78793	3.32583	2.68841	4.42556	4.05806	3.78798	3.6408	3.66089	4.0298	3.85393	4.78793	3.32583	2.68841	4.42556	4.05806	3.78798	3.6408	-0.211512	3.82592	-0.590772	0.568408	0.73137	-6.76853	NonSig	1	Single-promoter
502	ENSG00000080561	MID2	chrX	107826079	+	FALSE	1	FB-PB.5348.1	2.16059	2.16059	2.67716	2.67716	Major	Major	4.24189	2.75493	2.19823	1.60792	0	3.43334	2.67627	2.24119	2.66422	2.37077	4.24189	2.75493	2.19823	1.60792	0	3.43334	2.67627	2.24119	2.66422	2.37077	0.516564	2.41888	0.771252	0.459239	0.640328	-6.64034	NonSig	1	Single-promoter
503	ENSG00000080802	CNOT4	chr7	135510112	-	FALSE	1	FB-PB.4669.1,FB-PB.4669.2,FB-PB.4669.3	5.19132	5.19132	4.37829	4.37829	Major	Major	4.1719	5.58376	5.57467	5.16261	5.46367	4.11587	4.42556	4.29567	3.99538	5.05894	4.1719	5.58376	5.57467	5.16261	5.46367	4.11587	4.42556	4.29567	3.99538	5.05894	-0.813038	4.7848	-2.62754	0.0262232	0.104851	-4.12078	NonSig	1	Single-promoter
504	ENSG00000080815	PSEN1	chr14	73136455	+	FALSE	1	FB-PB.1645.1,FB-PB.1645.2	4.33941	4.33941	3.86596	3.86596	Major	Major	3.9389	4.58502	4.37437	4.9874	3.81138	3.92216	3.09572	4.12123	4.54987	3.6408	3.9389	4.58502	4.37437	4.9874	3.81138	3.92216	3.09572	4.12123	4.54987	3.6408	-0.473456	4.10268	-1.53089	0.158267	0.324994	-5.81004	NonSig	1	Single-promoter
505	ENSG00000080822	CLDND1	chr3	98522922	-	FALSE	1	FB-PB.3455.1	1.56324	1.56324	3.22568	3.22568	Major	Major	0	1.95424	0.923938	2.34943	2.58858	2.68841	3.26711	2.63669	3.8954	3.6408	0	1.95424	0.923938	2.34943	2.58858	2.68841	3.26711	2.63669	3.8954	3.6408	1.66244	2.39446	3.28329	0.00877327	0.0502153	-3.02442	NonSig	1	Single-promoter
506	ENSG00000080824	HSP90AA1	chr14	102087147	-	FALSE	1	FB-PB.1700.1,FB-PB.1700.2	6.0104	6.0104	6.11976	6.11976	Major	Major	5.13131	6.3988	5.65394	6.73441	6.13356	6.05207	6.21589	6.40095	5.58442	6.34544	5.13131	6.3988	5.65394	6.73441	6.13356	6.05207	6.21589	6.40095	5.58442	6.34544	0.109352	6.06508	0.359968	0.726714	0.845137	-6.88571	NonSig	1	Single-promoter
507	ENSG00000080845	DLGAP4	chr20	36461468	+	FALSE	1	FB-PB.3078.1	3.87893	12.8166	3.08547	11.2435	Minor	Minor	4.6027	4.52623	2.86414	3.49064	3.91094	3.10843	3.68509	2.80004	3.78798	2.04584	14.3133	13.5683	11.5473	12.2391	12.4151	11.2973	12.051	10.5827	12.7373	9.54925	-0.793453	3.4822	-1.86402	0.093346	0.234743	-5.33651	NonSig	2	Multiple-promoter
508	ENSG00000080845	DLGAP4	chr20	36461788	+	FALSE	2	FB-PB.3078.2,FB-PB.3078.3	8.9377	12.8166	8.15804	11.2435	Major	Major	9.71062	9.04206	8.68321	8.74846	8.50417	8.18892	8.36594	7.78266	8.94927	7.50341	14.3133	13.5683	11.5473	12.2391	12.4151	11.2973	12.051	10.5827	12.7373	9.54925	-0.779664	8.54787	-2.50141	0.0324192	0.119378	-4.32912	NonSig	2	Multiple-promoter
509	ENSG00000081014	AP4E1	chr15	50908692	+	FALSE	1	FB-PB.1771.1	3.07117	3.07117	3.78184	3.78184	Major	Major	3.31619	2.75493	3.7615	2.34943	3.17378	4.64169	3.68509	3.77344	2.66422	4.14476	3.31619	2.75493	3.7615	2.34943	3.17378	4.64169	3.68509	3.77344	2.66422	4.14476	0.710673	3.4265	1.86089	0.0938215	0.235487	-5.34118	NonSig	1	Single-promoter
510	ENSG00000081087	OSTM1	chr6	108074741	-	FALSE	1	FB-PB.4331.1,FB-PB.4331.2,FB-PB.4331.3	3.86298	3.86298	3.93439	3.93439	Major	Major	2.45422	4.33395	4.43547	3.83923	4.25204	3.28001	4.62789	4.45128	4.25943	3.05334	2.45422	4.33395	4.43547	3.83923	4.25204	3.28001	4.62789	4.45128	4.25943	3.05334	0.0714091	3.89869	0.157133	0.878417	0.94214	-6.94267	NonSig	1	Single-promoter
511	ENSG00000081177	EXD2	chr14	69191498	+	FALSE	1	FB-PB.1637.1	3.06044	3.06044	1.79678	1.79678	Major	Major	4.1719	2.27306	3.18199	2.34943	3.32583	0	2.08243	2.80004	1.04808	3.05334	4.1719	2.27306	3.18199	2.34943	3.32583	0	2.08243	2.80004	1.04808	3.05334	-1.26366	2.42861	-2.04749	0.0691493	0.193014	-5.05717	NonSig	1	Single-promoter
512	ENSG00000081277	PKP1	chr1	201283506	+	FALSE	1	FB-PB.447.1	6.05814	6.05814	5.73321	5.73321	Major	Major	6.28649	8.70035	5.27374	3.61643	6.41368	6.35051	4.35129	4.45128	6.30282	7.21013	6.28649	8.70035	5.27374	3.61643	6.41368	6.35051	4.35129	4.45128	6.30282	7.21013	-0.324931	5.89567	-0.351654	0.732743	0.849282	-6.88891	NonSig	1	Single-promoter
513	ENSG00000081377	CDC14B	chr9	96566893	-	FALSE	1	FB-PB.5032.1	2.94248	2.94248	1.22336	1.22336	Major	Major	0	2.94647	4.10024	4.20234	3.46337	2.09343	1.65846	1.31681	1.04808	0	0	2.94647	4.10024	4.20234	3.46337	2.09343	1.65846	1.31681	1.04808	0	-1.71913	2.08292	-2.20299	0.0534383	0.164342	-4.81269	NonSig	1	Single-promoter
514	ENSG00000081386	ZNF510	chr9	96778082	-	FALSE	1	FB-PB.5034.1	2.27662	2.27662	1.38197	1.38197	Major	Major	0	2.94647	1.48263	3.49064	3.46337	2.42137	2.40969	0	1.04808	1.03072	0	2.94647	1.48263	3.49064	3.46337	2.42137	2.40969	0	1.04808	1.03072	-0.89465	1.8293	-1.18434	0.264955	0.454308	-6.24015	NonSig	1	Single-promoter
515	ENSG00000081721	DUSP12	chr1	161749786	+	FALSE	1	FB-PB.372.1	3.20277	3.20277	2.85452	2.85452	Major	Major	4.75408	2.94647	4.37437	3.93892	0	2.91365	3.55876	2.63669	1.64871	3.51481	4.75408	2.94647	4.37437	3.93892	0	2.91365	3.55876	2.63669	1.64871	3.51481	-0.348244	3.02865	-0.409286	0.69137	0.821342	-6.86526	NonSig	1	Single-promoter
516	ENSG00000081760	AACS	chr12	125065400	+	FALSE	1	FB-PB.1388.1	5.31106	5.31106	5.03271	5.03271	Major	Major	4.934	5.84659	5.05755	5.39102	5.32616	4.50995	5.42819	5.11065	4.84609	5.26865	4.934	5.84659	5.05755	5.39102	5.32616	4.50995	5.42819	5.11065	4.84609	5.26865	-0.278356	5.17189	-1.23771	0.245429	0.430627	-6.17889	NonSig	1	Single-promoter
519	ENSG00000082153	BZW1	chr2	200810559	+	FALSE	1	FB-PB.2928.1	0	13.0971	0.858854	17.7845	Inactive	Minor	0	0	0	0	0	0	1.65846	0	0	2.63581	12.9975	14.1057	11.7981	13.4919	13.0921	16.9627	18.0916	17.3889	16.0966	20.3826	0.858854	0.429427	1.68564	0.124243	0.276425	-5.59624	NonSig	4	Multiple-promoter
520	ENSG00000082153	BZW1	chr2	200811566	+	FALSE	2	FB-PB.2928.2	0.693902	13.0971	3.12985	17.7845	Minor	Minor	0.922984	1.54436	0	0	1.00217	3.43334	2.90118	3.20184	2.88882	3.2241	12.9975	14.1057	11.7981	13.4919	13.0921	16.9627	18.0916	17.3889	16.0966	20.3826	2.43595	1.91188	7.96487	1.62736e-05	0.00106266	3.46214	UpReg	4	Multiple-promoter
521	ENSG00000082153	BZW1	chr2	200811910	+	FALSE	3	FB-PB.2928.3,FB-PB.2928.4,FB-PB.2928.5	4.80531	13.0971	5.55252	17.7845	Minor	Minor	4.6027	4.84763	4.49409	5.61855	4.46357	5.58002	5.49871	5.73309	5.13622	5.81459	12.9975	14.1057	11.7981	13.4919	13.0921	16.9627	18.0916	17.3889	16.0966	20.3826	0.747216	5.17892	3.11048	0.0116789	0.0615042	-3.31365	NonSig	4	Multiple-promoter
522	ENSG00000082153	BZW1	chr2	200818057	+	TRUE	4	FB-PB.3488.1	7.59786	13.0971	8.24324	17.7845	NA	NA	7.47182	7.71373	7.30401	7.87335	7.62637	7.9493	8.03327	8.45399	8.07152	8.70811	12.9975	14.1057	11.7981	13.4919	13.0921	16.9627	18.0916	17.3889	16.0966	20.3826	0.645382	7.92055	3.53951	0.00576986	0.0383158	-2.59806	NonSig	4	Multiple-promoter
523	ENSG00000082212	ME2	chr18	50879167	+	FALSE	1	FB-PB.2379.1	3.00945	3.00945	3.30762	3.30762	Major	Major	2.19665	4.0298	3.0318	3.20045	2.58858	3.43334	2.67627	2.94676	3.25432	4.22742	2.19665	4.0298	3.0318	3.20045	2.58858	3.43334	2.67627	2.94676	3.25432	4.22742	0.298165	3.15854	0.77942	0.454638	0.636851	-6.63382	NonSig	1	Single-promoter
524	ENSG00000082213	C5orf22	chr5	31532301	+	FALSE	1	FB-PB.3911.1	3.62684	3.62684	3.13182	3.13182	Major	Major	3.18019	3.11553	4.1738	3.49064	4.17402	3.92216	1.65846	3.77344	2.66422	3.6408	3.18019	3.11553	4.1738	3.49064	4.17402	3.92216	1.65846	3.77344	2.66422	3.6408	-0.49502	3.37933	-1.08722	0.30365	0.495916	-6.34639	NonSig	1	Single-promoter
525	ENSG00000082258	CCNT2	chr2	134918834	+	FALSE	1	FB-PB.2827.1	4.25414	4.25414	3.77735	3.77735	Major	Major	4.09833	4.18988	4.10024	4.35453	4.52771	4.11587	4.10232	3.77344	3.25432	3.6408	4.09833	4.18988	4.10024	4.35453	4.52771	4.11587	4.10232	3.77344	3.25432	3.6408	-0.476788	4.01574	-2.55656	0.0295482	0.113278	-4.23824	NonSig	1	Single-promoter
526	ENSG00000082397	EPB41L3	chr18	5544074	-	FALSE	1	FB-PB.2318.1	4.69321	4.69321	4.46915	4.46915	Major	Major	4.84684	4.18988	4.80316	5.16261	4.46357	4.76239	3.90873	4.98041	4.17667	4.51753	4.84684	4.18988	4.80316	5.16261	4.46357	4.76239	3.90873	4.98041	4.17667	4.51753	-0.224064	4.58118	-0.895924	0.392345	0.579471	-6.53437	NonSig	1	Single-promoter
527	ENSG00000082516	GEMIN5	chr5	154938211	-	FALSE	1	FB-PB.4148.1,FB-PB.4148.2,FB-PB.4148.3	4.84867	4.84867	4.06678	4.06678	Major	Major	4.6027	5.33246	5.628	4.03217	4.64802	3.81459	4.62789	3.51577	4.41194	3.96372	4.6027	5.33246	5.628	4.03217	4.64802	3.81459	4.62789	3.51577	4.41194	3.96372	-0.781889	4.45773	-2.36753	0.0405898	0.136668	-4.54798	NonSig	1	Single-promoter
528	ENSG00000082641	NFE2L1	chr17	48048336	+	FALSE	1	FB-PB.2219.1,FB-PB.2219.2,FB-PB.2219.3,FB-PB.2219.4	5.44819	10.9031	5.53118	10.5237	Minor	Major	5.01619	5.1498	6.03573	5.67747	5.36178	5.6125	5.10561	5.64984	5.73663	5.55133	10.4463	10.4823	11.4065	11.1704	11.0099	10.2542	10.3815	9.5726	11.7123	10.6978	0.0829868	5.48969	0.385459	0.708355	0.833935	-6.87546	NonSig	2	Multiple-promoter
529	ENSG00000082641	NFE2L1	chr17	48048781	+	FALSE	2	FB-PB.2219.5	5.45488	10.9031	4.99251	10.5237	Major	Minor	5.43007	5.33246	5.37079	5.49296	5.64811	4.64169	5.2759	3.92276	5.97569	5.14651	10.4463	10.4823	11.4065	11.1704	11.0099	10.2542	10.3815	9.5726	11.7123	10.6978	-0.462366	5.22369	-1.40574	0.191534	0.366778	-5.97379	NonSig	2	Multiple-promoter
530	ENSG00000082701	GSK3B	chr3	120094447	-	FALSE	1	FB-PB.3492.1,FB-PB.3492.2	7.19343	7.19343	7.31647	7.31647	Major	Major	7.30201	7.53144	6.77573	7.365	6.99299	7.63833	6.99064	7.30666	6.96418	7.68255	7.30201	7.53144	6.77573	7.365	6.99299	7.63833	6.99064	7.30666	6.96418	7.68255	0.123042	7.25495	0.59549	0.565378	0.729828	-6.76558	NonSig	1	Single-promoter
531	ENSG00000082805	ERC1	chr12	991223	+	FALSE	1	FB-PB.1087.1,FB-PB.1087.2,FB-PB.1087.3	4.55183	4.55183	4.65282	4.65282	Major	Major	4.97568	4.6415	5.01815	4.11976	4.00406	4.57732	4.4962	4.7197	4.41194	5.05894	4.97568	4.6415	5.01815	4.11976	4.00406	4.57732	4.4962	4.7197	4.41194	5.05894	0.100992	4.60233	0.427705	0.678362	0.812478	-6.85697	NonSig	1	Single-promoter
532	ENSG00000082898	XPO1	chr2	61495490	-	TRUE	2	FB-PB.2721.6	6.74828	15.0303	7.24947	15.4567	NA	NA	6.67598	6.68071	6.94288	7.01131	6.43055	7.11103	7.00283	7.39878	7.12733	7.60738	15.6159	14.9096	15.175	15.0734	14.3774	15.4336	15.5335	15.6699	15.6479	14.9987	0.501183	6.99888	3.05204	0.012872	0.0659248	-3.4116	NonSig	2	Multiple-promoter
533	ENSG00000082898	XPO1	chr2	61538271	-	FALSE	1	FB-PB.2721.1,FB-PB.2721.2,FB-PB.2721.3	8.28198	15.0303	8.20725	15.4567	Major	Major	8.93996	8.22887	8.23215	8.06207	7.94683	8.32254	8.53065	8.2711	8.5206	7.39135	15.6159	14.9096	15.175	15.0734	14.3774	15.4336	15.5335	15.6699	15.6479	14.9987	-0.0747295	8.24461	-0.282824	0.783355	0.880866	-6.91256	NonSig	2	Multiple-promoter
534	ENSG00000082996	RNF13	chr3	149812726	+	FALSE	1	FB-PB.3568.1,FB-PB.3568.2,FB-PB.3568.3,FB-PB.3568.4,FB-PB.3568.5	5.07478	5.07478	4.44089	4.44089	Major	Major	4.84684	4.98495	5.20522	5.4258	4.91108	4.43928	4.62789	4.29567	4.61418	4.22742	4.84684	4.98495	5.20522	5.4258	4.91108	4.43928	4.62789	4.29567	4.61418	4.22742	-0.633892	4.75783	-4.21778	0.00197477	0.0191751	-1.4968	NonSig	1	Single-promoter
535	ENSG00000083093	PALB2	chr16	23641310	-	FALSE	1	FB-PB.1953.1	1.16812	1.16812	1.29508	1.29508	Major	Major	2.6727	0.969653	2.19823	0	0	1.06295	0	1.9936	1.04808	2.37077	2.6727	0.969653	2.19823	0	0	1.06295	0	1.9936	1.04808	2.37077	0.126965	1.2316	0.198952	0.846477	0.925621	-6.93455	NonSig	1	Single-promoter
536	ENSG00000083099	LYRM2	chr6	89638747	-	FALSE	1	FB-PB.4314.1	3.35939	3.35939	4.13303	4.13303	Major	Major	3.44047	3.11553	3.94079	2.8368	3.46337	4.02226	4.00877	4.12123	3.99538	4.51753	3.44047	3.11553	3.94079	2.8368	3.46337	4.02226	4.00877	4.12123	3.99538	4.51753	0.773643	3.74621	3.66493	0.00471175	0.0335039	-2.39099	NonSig	1	Single-promoter
537	ENSG00000083123	BCKDHB	chr6	80106671	+	FALSE	1	FB-PB.4294.1	3.79877	3.79877	2.87776	2.87776	Major	Major	3.55488	4.33395	3.94079	3.35283	3.81138	3.69835	1.65846	3.31424	3.67191	2.04584	3.55488	4.33395	3.94079	3.35283	3.81138	3.69835	1.65846	3.31424	3.67191	2.04584	-0.921003	3.33826	-2.1395	0.0593861	0.175339	-4.91325	NonSig	1	Single-promoter
538	ENSG00000083223	TUT7	chr9	86354462	-	FALSE	1	FB-PB.5019.1,FB-PB.5019.2,FB-PB.5019.3,FB-PB.5019.4,FB-PB.5019.5	4.01326	4.01326	4.37546	4.37546	Major	Major	4.37244	4.40093	3.55673	3.73212	4.00406	4.76239	4.35129	3.77344	4.17667	4.81348	4.37244	4.40093	3.55673	3.73212	4.00406	4.76239	4.35129	3.77344	4.17667	4.81348	0.362196	4.19436	1.44849	0.179547	0.353678	-5.91884	NonSig	1	Single-promoter
539	ENSG00000083290	ULK2	chr17	19867933	-	FALSE	1	FB-PB.2129.1,FB-PB.2129.2	2.3161	2.3161	1.58259	1.58259	Major	Major	3.75963	2.75493	2.45587	1.60792	1.00217	0	2.90118	1.31681	2.66422	1.03072	3.75963	2.75493	2.45587	1.60792	1.00217	0	2.90118	1.31681	2.66422	1.03072	-0.733516	1.94935	-1.10575	0.295946	0.487874	-6.32665	NonSig	1	Single-promoter
540	ENSG00000083312	TNPO1	chr5	72816681	+	FALSE	1	FB-PB.3985.2	4.76837	17.7718	5.03368	19.2219	Minor	Minor	4.24189	5.02796	4.49409	5.31883	4.75906	4.76239	5.23517	5.11065	4.79152	5.26865	19.8964	17.0756	16.4383	18.5711	16.8774	19.7477	18.6307	19.5572	18.7697	19.4043	0.26531	4.90102	1.2151	0.253554	0.44113	-6.20508	NonSig	4	Multiple-promoter
541	ENSG00000083312	TNPO1	chr5	72816796	+	FALSE	2	FB-PB.3985.3	0.534539	17.7718	0.422206	19.2219	Minor	Minor	2.6727	0	0	0	0	1.06295	0	0	1.04808	0	19.8964	17.0756	16.4383	18.5711	16.8774	19.7477	18.6307	19.5572	18.7697	19.4043	-0.112333	0.478372	-0.203973	0.842661	0.922735	-6.93345	NonSig	4	Multiple-promoter
542	ENSG00000083312	TNPO1	chr5	72848144	+	FALSE	3	FB-PB.3985.4,FB-PB.3985.6	4.9823	17.7718	5.54125	19.2219	Minor	Minor	5.51733	4.33395	4.70731	5.64831	4.70461	5.67534	5.31551	5.84959	5.22127	5.64453	19.8964	17.0756	16.4383	18.5711	16.8774	19.7477	18.6307	19.5572	18.7697	19.4043	0.558945	5.26177	2.05738	0.0680306	0.191208	-5.04182	NonSig	4	Multiple-promoter
543	ENSG00000083312	TNPO1	chr5	72882511	+	TRUE	4	FB-PB.3985.8	7.48657	17.7718	8.22478	19.2219	NA	NA	7.46452	7.71373	7.23694	7.60397	7.4137	8.24697	8.08002	8.59696	7.70885	8.49108	19.8964	17.0756	16.4383	18.5711	16.8774	19.7477	18.6307	19.5572	18.7697	19.4043	0.738202	7.85567	4.00409	0.00275062	0.0242724	-1.83841	NonSig	4	Multiple-promoter
544	ENSG00000083444	PLOD1	chr1	11934717	+	FALSE	1	FB-PB.33.1	5.78823	5.78823	7.01847	7.01847	Major	Major	6.48715	5.61231	5.93353	5.61855	5.28963	7.06483	7.32735	7.11823	6.83521	6.74673	6.48715	5.61231	5.93353	5.61855	5.28963	7.06483	7.32735	7.11823	6.83521	6.74673	1.23024	6.40335	5.4549	0.000329324	0.00634613	0.359101	UpReg	1	Single-promoter
545	ENSG00000083520	DIS3	chr13	72781955	-	FALSE	1	FB-PB.1481.1,FB-PB.1481.2,FB-PB.1481.3	5.08028	5.08028	5.28319	5.28319	Major	Major	4.75408	5.6403	5.8005	4.20234	5.0042	5.28991	5.10561	5.41792	5.22127	5.38124	4.75408	5.6403	5.8005	4.20234	5.0042	5.28991	5.10561	5.41792	5.22127	5.38124	0.202907	5.18174	0.708	0.495883	0.669599	-6.68876	NonSig	1	Single-promoter
546	ENSG00000083642	PDS5B	chr13	32586517	+	FALSE	1	FB-PB.1429.1	4.2956	4.2956	3.81824	3.81824	Major	Major	3.44047	4.18988	4.70731	4.67679	4.46357	3.57192	3.90873	4.18175	3.78798	3.6408	3.44047	4.18988	4.70731	4.67679	4.46357	3.57192	3.90873	4.18175	3.78798	3.6408	-0.477366	4.05692	-1.90403	0.0874736	0.226101	-5.27656	NonSig	1	Single-promoter
547	ENSG00000083720	OXCT1	chr5	41870440	-	FALSE	1	FB-PB.3937.1	4.28667	4.28667	4.39317	4.39317	Major	Major	3.44047	4.46494	4.43547	4.84044	4.25204	4.57732	3.68509	4.45128	4.54987	4.70228	3.44047	4.46494	4.43547	4.84044	4.25204	4.57732	3.68509	4.45128	4.54987	4.70228	0.106497	4.33992	0.375635	0.715408	0.837957	-6.87949	NonSig	1	Single-promoter
550	ENSG00000083896	YTHDC1	chr4	68350072	-	FALSE	1	FB-PB.5166.1	0	0	0	0	Inactive	Inactive	0	0	0	0	0	0	0	0	0	0	0	0	0	0	0	0	0	0	0	0	0	0	0	1	1	-6.95617	NonSig	1	Single-promoter
551	ENSG00000084073	ZMPSTE24	chr1	40258070	+	FALSE	1	FB-PB.120.1,FB-PB.120.2	4.45338	4.45338	5.07322	5.07322	Major	Major	4.30864	4.40093	4.60463	4.425	4.52771	5.11957	5.2759	5.25847	4.89868	4.81348	4.30864	4.40093	4.60463	4.425	4.52771	5.11957	5.2759	5.25847	4.89868	4.81348	0.619839	4.7633	4.73714	0.000906392	0.0121504	-0.691188	NonSig	1	Single-promoter
552	ENSG00000084090	STARD7	chr2	96195445	-	TRUE	2	FB-PB.2777.4	6.91949	12.864	6.60087	12.4682	NA	NA	7.35824	7.01593	6.63954	6.96475	6.619	6.98023	6.37431	6.6675	6.3222	6.6601	14.1554	12.7886	12.1013	13.1278	12.1468	12.9841	11.7284	12.7884	12.143	12.6972	-0.318624	6.76018	-1.70445	0.120592	0.272636	-5.56948	NonSig	2	Multiple-promoter
553	ENSG00000084090	STARD7	chr2	96208824	-	FALSE	1	FB-PB.2777.3,FB-PB.2777.2,FB-PB.2777.1	5.94449	12.864	5.86735	12.4682	Minor	Minor	6.79717	5.77264	5.46172	6.16309	5.5278	6.00391	5.35406	6.12087	5.82079	6.03714	14.1554	12.7886	12.1013	13.1278	12.1468	12.9841	11.7284	12.7884	12.143	12.6972	-0.0771325	5.90592	-0.28323	0.783053	0.880866	-6.91244	NonSig	2	Multiple-promoter
554	ENSG00000084093	REST	chr4	56907898	+	FALSE	1	FB-PB.3731.1,FB-PB.3731.2	6.2585	6.2585	5.06576	5.06576	Major	Major	7.40475	6.6397	6.05533	5.86659	5.32616	4.76239	5.1501	5.11065	5.92589	4.37975	7.40475	6.6397	6.05533	5.86659	5.32616	4.76239	5.1501	5.11065	5.92589	4.37975	-1.19275	5.66213	-2.90668	0.01641	0.077463	-3.65517	NonSig	1	Single-promoter
555	ENSG00000084234	APLP2	chr11	130069894	+	FALSE	1	FB-PB.1077.4,FB-PB.1077.5,FB-PB.1077.1,FB-PB.1077.2,FB-PB.1077.3,FB-PB.1077.6	8.10457	16.6796	8.14967	16.7315	Minor	Minor	8.19968	7.98329	8.2017	8.08945	8.04871	7.97451	8.22745	8.33578	8.11662	8.094	16.7035	16.5515	16.8434	16.7347	16.5648	16.4461	16.921	17.0704	16.5816	16.6385	0.0451064	8.12712	0.40764	0.692538	0.822231	-6.86599	NonSig	2	Multiple-promoter
556	ENSG00000084234	APLP2	chr11	130109469	+	TRUE	2	FB-PB.1077.8	8.57499	16.6796	8.58186	16.7315	NA	NA	8.50381	8.56817	8.64167	8.64523	8.51608	8.47164	8.69358	8.73463	8.46501	8.54445	16.7035	16.5515	16.8434	16.7347	16.5648	16.4461	16.921	17.0704	16.5816	16.6385	0.00686963	8.57843	0.0656816	0.948988	0.988089	-6.95381	NonSig	2	Multiple-promoter
557	ENSG00000084463	WBP11	chr12	14803505	-	FALSE	1	FB-PB.1117.1,FB-PB.1117.2	5.29176	5.29176	5.54237	5.54237	Major	Major	4.84684	5.49458	5.09591	5.52539	5.49609	5.51277	5.59841	5.93997	4.84609	5.81459	4.84684	5.49458	5.09591	5.52539	5.49609	5.51277	5.59841	5.93997	4.84609	5.81459	0.250603	5.41706	1.08387	0.305062	0.497146	-6.34993	NonSig	1	Single-promoter
558	ENSG00000084636	COL16A1	chr1	31704017	-	FALSE	1	FB-PB.85.1	6.24539	6.24539	5.71847	5.71847	Major	Major	6.93032	5.984	6.33733	5.76158	6.21373	5.84896	5.46388	5.67111	5.82079	5.7876	6.93032	5.984	6.33733	5.76158	6.21373	5.84896	5.46388	5.67111	5.82079	5.7876	-0.526921	5.98193	-2.49885	0.0325589	0.119668	-4.33332	NonSig	1	Single-promoter
559	ENSG00000084652	TXLNA	chr1	32179682	+	FALSE	1	FB-PB.92.1	2.98826	8.645	2.95045	8.70926	Minor	Minor	3.44047	3.26684	3.0318	2.6136	2.58858	2.09343	3.26711	2.63669	3.8954	2.85963	9.35068	8.56457	8.85534	8.40215	8.05224	8.16899	8.92836	8.34941	9.47982	8.61973	-0.0378042	2.96935	-0.114517	0.911203	0.964543	-6.949	NonSig	2	Multiple-promoter
560	ENSG00000084652	TXLNA	chr1	32180052	+	TRUE	2	FB-PB.92.2	5.65674	8.645	5.75881	8.70926	NA	NA	5.91021	5.29773	5.82354	5.78855	5.46367	6.07556	5.66125	5.71272	5.58442	5.7601	9.35068	8.56457	8.85534	8.40215	8.05224	8.16899	8.92836	8.34941	9.47982	8.61973	0.102068	5.70778	0.644586	0.534391	0.70378	-6.73355	NonSig	2	Multiple-promoter
561	ENSG00000084733	RAB10	chr2	26034084	+	FALSE	1	FB-PB.2638.1,FB-PB.2638.2,FB-PB.2638.3,FB-PB.2638.4,FB-PB.2638.5,FB-PB.2638.6,FB-PB.2638.7,FB-PB.2638.8	6.83412	6.83412	6.76662	6.76662	Major	Major	6.63755	7.67366	6.47467	6.57309	6.81165	6.42556	6.91531	7.08692	6.61717	6.78816	6.63755	7.67366	6.47467	6.57309	6.81165	6.42556	6.91531	7.08692	6.61717	6.78816	-0.067499	6.80037	-0.280063	0.78541	0.882741	-6.91341	NonSig	1	Single-promoter
562	ENSG00000084754	HADHA	chr2	26244721	-	FALSE	1	FB-PB.2640.1,FB-PB.2640.2	6.28445	6.28445	6.16786	6.16786	Major	Major	6.12917	6.31445	6.05533	6.50965	6.41368	5.76476	5.96506	6.5576	5.84779	6.70406	6.12917	6.31445	6.05533	6.50965	6.41368	5.76476	5.96506	6.5576	5.84779	6.70406	-0.116596	6.22616	-0.55033	0.594746	0.749989	-6.79295	NonSig	1	Single-promoter
563	ENSG00000084774	CAD	chr2	27217401	+	FALSE	1	FB-PB.2643.1	4.85021	4.85021	5.11696	5.11696	Major	Major	5.5727	4.6415	5.30682	4.20234	4.52771	5.40564	4.96325	4.59173	5.70744	4.91673	5.5727	4.6415	5.30682	4.20234	4.52771	5.40564	4.96325	4.59173	5.70744	4.91673	0.266745	4.98359	0.868477	0.406457	0.593994	-6.55887	NonSig	1	Single-promoter
564	ENSG00000085063	CD59	chr11	33736445	-	FALSE	1	FB-PB.891.2,FB-PB.891.1	8.25129	8.25129	8.59627	8.59627	Major	Major	8.29743	8.28314	7.80431	8.3242	8.54736	8.77044	8.92244	8.65682	8.41624	8.21541	8.29743	8.28314	7.80431	8.3242	8.54736	8.77044	8.92244	8.65682	8.41624	8.21541	0.344982	8.42378	1.89094	0.0893558	0.228522	-5.29623	NonSig	1	Single-promoter
565	ENSG00000085117	CD82	chr11	44565653	+	FALSE	1	FB-PB.904.1	4.80323	4.80323	6.03822	6.03822	Major	Major	5.67745	5.66776	3.55673	5.20328	3.91094	6.42556	6.10725	5.60634	6.15932	5.89265	5.67745	5.66776	3.55673	5.20328	3.91094	6.42556	6.10725	5.60634	6.15932	5.89265	1.235	5.42073	2.81822	0.0190333	0.0861114	-3.80318	NonSig	1	Single-promoter
566	ENSG00000085274	MYNN	chr3	169772802	+	FALSE	1	FB-PB.3594.1,FB-PB.3594.2,FB-PB.3594.3	3.28452	3.28452	3.29019	3.29019	Major	Major	2.8624	3.64391	4.10024	3.49064	2.3254	2.91365	3.42029	3.85003	3.40734	2.85963	2.8624	3.64391	4.10024	3.49064	2.3254	2.91365	3.42029	3.85003	3.40734	2.85963	0.00567312	3.28735	0.0165956	0.987101	1	-6.95602	NonSig	1	Single-promoter
567	ENSG00000085365	SCAMP1	chr5	78360579	+	FALSE	1	FB-PB.4005.1,FB-PB.4005.2,FB-PB.4005.4,FB-PB.4005.3	5.61762	11.4384	5.66637	11.4786	Minor	Minor	5.51733	5.49458	5.84622	5.31883	5.91115	5.11957	5.69167	5.88642	5.55195	6.08226	10.4084	11.4115	12.1512	11.375	11.8462	11.3497	10.9676	12.0972	11.1364	11.8424	0.0487531	5.642	0.242106	0.813824	0.903276	-6.92418	NonSig	2	Multiple-promoter
568	ENSG00000085365	SCAMP1	chr5	78416580	+	TRUE	2	FB-PB.4005.5	5.82082	11.4384	5.81225	11.4786	NA	NA	4.89108	5.91693	6.30495	6.05614	5.935	6.23008	5.2759	6.21074	5.58442	5.7601	10.4084	11.4115	12.1512	11.375	11.8462	11.3497	10.9676	12.0972	11.1364	11.8424	-0.00857167	5.81653	-0.029362	0.977181	1	-6.9557	NonSig	2	Multiple-promoter
569	ENSG00000085377	PREP	chr6	105403102	-	FALSE	1	FB-PB.4324.1,FB-PB.4324.2	3.43644	3.43644	3.74717	3.74717	Major	Major	3.85205	3.64391	2.6744	3.20045	3.81138	4.11587	3.90873	3.20184	3.54569	3.96372	3.85205	3.64391	2.6744	3.20045	3.81138	4.11587	3.90873	3.20184	3.54569	3.96372	0.310733	3.5918	1.15708	0.275397	0.466941	-6.27065	NonSig	1	Single-promoter
570	ENSG00000085415	SEH1L	chr18	12948021	+	FALSE	1	FB-PB.2333.1	5.22398	5.22398	5.24409	5.24409	Major	Major	5.13131	6.04809	4.75603	4.78793	5.39655	5.20726	4.68948	5.95738	4.94942	5.4169	5.13131	6.04809	4.75603	4.78793	5.39655	5.20726	4.68948	5.95738	4.94942	5.4169	0.0201075	5.23403	0.0655881	0.94906	0.988089	-6.95382	NonSig	1	Single-promoter
571	ENSG00000085433	WDR47	chr1	109042113	-	FALSE	1	FB-PB.261.1	6.22245	6.22245	4.92418	4.92418	Major	Major	5.7513	7.51641	5.89054	6.42621	5.5278	4.81916	4.74855	5.14145	4.89868	5.01308	5.7513	7.51641	5.89054	6.42621	5.5278	4.81916	4.74855	5.14145	4.89868	5.01308	-1.29827	5.57332	-3.78307	0.00389987	0.029785	-2.1972	DownReg	1	Single-promoter
572	ENSG00000085449	WDFY1	chr2	223945309	-	FALSE	1	FB-PB.2973.1,FB-PB.2973.2	4.87965	4.87965	4.94401	4.94401	Major	Major	4.37244	4.98495	5.13327	4.73343	5.17414	5.32953	5.1501	4.75996	4.89868	4.58177	4.37244	4.98495	5.13327	4.73343	5.17414	5.32953	5.1501	4.75996	4.89868	4.58177	0.0643628	4.91183	0.317655	0.757592	0.865607	-6.90122	NonSig	1	Single-promoter
573	ENSG00000085491	SLC25A24	chr1	108200336	-	FALSE	1	FB-PB.259.4,FB-PB.259.3,FB-PB.259.1,FB-PB.259.2	3.92495	3.92495	4.42434	4.42434	Major	Major	2.19665	4.69586	3.94079	4.20234	4.58912	4.76239	4.4962	5.17161	4.17667	3.51481	2.19665	4.69586	3.94079	4.20234	4.58912	4.76239	4.4962	5.17161	4.17667	3.51481	0.499387	4.17464	1.00853	0.338101	0.529267	-6.42727	NonSig	1	Single-promoter
574	ENSG00000085644	ZNF213	chr16	3135122	+	FALSE	1	FB-PB.1901.1	2.70227	2.70227	2.18066	2.18066	Major	Major	4.09833	1.54436	3.0318	2.0258	2.81107	2.42137	1.65846	1.69453	3.08311	2.04584	4.09833	1.54436	3.0318	2.0258	2.81107	2.42137	1.65846	1.69453	3.08311	2.04584	-0.521608	2.44147	-1.09128	0.30195	0.493757	-6.34209	NonSig	1	Single-promoter
575	ENSG00000085719	CPNE3	chr8	86514438	+	FALSE	1	FB-PB.4835.1,FB-PB.4835.2	5.95483	5.95483	5.31463	5.31463	Major	Major	6.05334	5.89386	6.07466	6.16309	5.58921	5.02622	4.74855	5.46739	6.02384	5.30716	6.05334	5.89386	6.07466	6.16309	5.58921	5.02622	4.74855	5.46739	6.02384	5.30716	-0.640202	5.63473	-2.72639	0.0222075	0.0945748	-3.95644	NonSig	1	Single-promoter
576	ENSG00000085721	RRN3	chr16	15094290	-	FALSE	1	FB-PB.1925.1,FB-PB.5187.1	0.694093	0.694093	0.934607	0.934607	Major	Major	0	1.54436	0.923938	0	1.00217	0	0	1.9936	1.64871	1.03072	0	1.54436	0.923938	0	1.00217	0	0	1.9936	1.64871	1.03072	0.240514	0.81435	0.505307	0.624815	0.776277	-6.81823	NonSig	1	Single-promoter
577	ENSG00000085733	CTTN	chr11	70398529	+	FALSE	1	FB-PB.979.1,FB-PB.979.2,FB-PB.979.3	6.25966	6.25966	6.29129	6.29129	Major	Major	6.26983	5.82236	6.60006	6.14233	6.46372	6.23008	5.96506	6.34912	6.3602	6.552	6.26983	5.82236	6.60006	6.14233	6.46372	6.23008	5.96506	6.34912	6.3602	6.552	0.0316321	6.27548	0.180942	0.8602	0.932766	-6.93828	NonSig	1	Single-promoter
578	ENSG00000085832	EPS15	chr1	51519365	-	FALSE	1	FB-PB.148.2,FB-PB.148.1	6.14672	6.14672	5.27336	5.27336	Major	Major	6.67598	5.82236	6.22067	5.98794	6.02664	5.32953	5.35406	4.91061	5.22127	5.55133	6.67598	5.82236	6.22067	5.98794	6.02664	5.32953	5.35406	4.91061	5.22127	5.55133	-0.87336	5.71004	-4.67672	0.000990363	0.0128485	-0.782994	NonSig	1	Single-promoter
579	ENSG00000085872	CHERP	chr19	16542448	-	FALSE	1	FB-PB.2483.1	4.93248	4.93248	5.24247	5.24247	Major	Major	3.85205	4.69586	5.09591	5.45977	5.55883	5.47794	4.91249	4.83725	5.34012	5.64453	3.85205	4.69586	5.09591	5.45977	5.55883	5.47794	4.91249	4.83725	5.34012	5.64453	0.309981	5.08747	0.938712	0.371043	0.559672	-6.49491	NonSig	1	Single-promoter
580	ENSG00000085978	ATG16L1	chr2	233251660	+	FALSE	1	FB-PB.2994.1	3.99825	3.99825	3.63259	3.63259	Major	Major	3.9389	4.46494	3.55673	4.11976	3.91094	4.36497	3.09572	3.51577	3.54569	3.6408	3.9389	4.46494	3.55673	4.11976	3.91094	4.36497	3.09572	3.51577	3.54569	3.6408	-0.365666	3.81542	-1.4755	0.172311	0.345266	-5.88358	NonSig	1	Single-promoter
581	ENSG00000085999	RAD54L	chr1	46247739	+	FALSE	1	FB-PB.142.1	0	0	3.56075	3.56075	Inactive	Major	0	0	0	0	0	3.28001	3.90873	3.69256	3.54569	3.37677	0	0	0	0	0	3.28001	3.90873	3.69256	3.54569	3.37677	3.56075	1.78038	26.478	2.98878e-10	1.17101e-06	13.1052	UpReg	1	Single-promoter
582	ENSG00000086062	B4GALT1	chr9	33167186	-	FALSE	1	FB-PB.4962.1,FB-PB.4962.2	7.03182	7.03182	7.19716	7.19716	Major	Major	7.03259	7.01593	6.63954	7.59636	6.87466	7.73738	7.2477	7.2583	6.86195	6.88046	7.03259	7.01593	6.63954	7.59636	6.87466	7.73738	7.2477	7.2583	6.86195	6.88046	0.165338	7.11449	0.740648	0.476746	0.654704	-6.66423	NonSig	1	Single-promoter
583	ENSG00000086200	IPO11	chr5	62412763	+	FALSE	1	FB-PB.3965.1,FB-PB.3965.2	3.48104	3.48104	3.83674	3.83674	Major	Major	3.44047	3.84972	3.7615	2.34943	4.00406	4.02226	3.55876	4.05806	3.78798	3.75666	3.44047	3.84972	3.7615	2.34943	4.00406	4.02226	3.55876	4.05806	3.78798	3.75666	0.355708	3.65889	1.193	0.261701	0.451098	-6.23033	NonSig	1	Single-promoter
584	ENSG00000086232	EIF2AK1	chr7	6059225	-	FALSE	1	FB-PB.4438.1,FB-PB.4438.2,FB-PB.4438.3	5.08504	5.08504	5.53496	5.53496	Major	Major	3.75963	4.98495	5.30682	5.58816	5.78562	6.14382	5.42819	5.20114	5.44992	5.4517	3.75963	4.98495	5.30682	5.58816	5.78562	6.14382	5.42819	5.20114	5.44992	5.4517	0.449921	5.31	1.21912	0.252092	0.439953	-6.20045	NonSig	1	Single-promoter
585	ENSG00000086289	EPDR1	chr7	37920640	+	FALSE	1	FB-PB.4501.1	3.41408	3.41408	3.87828	3.87828	Major	Major	3.44047	3.11553	4.31056	3.03005	3.17378	4.11587	4.00877	4.63566	3.25432	3.37677	3.44047	3.11553	4.31056	3.03005	3.17378	4.11587	4.00877	4.63566	3.25432	3.37677	0.464199	3.64618	1.41485	0.188921	0.36391	-5.96216	NonSig	1	Single-promoter
586	ENSG00000086544	ITPKC	chr19	40717294	+	FALSE	1	FB-PB.2544.1	2.97389	2.97389	3.43683	3.43683	Major	Major	2.8624	4.58502	1.48263	2.6136	3.32583	3.81459	4.27298	2.63669	3.08311	3.37677	2.8624	4.58502	1.48263	2.6136	3.32583	3.81459	4.27298	2.63669	3.08311	3.37677	0.462933	3.20536	0.862022	0.409826	0.59625	-6.56453	NonSig	1	Single-promoter
587	ENSG00000086598	TMED2	chr12	123584538	+	FALSE	1	FB-PB.1379.1	8.37096	8.37096	9.09903	9.09903	Major	Major	7.89753	8.45846	8.52352	8.40488	8.57038	9.10603	8.8702	9.41931	8.96477	9.13483	7.89753	8.45846	8.52352	8.40488	8.57038	9.10603	8.8702	9.41931	8.96477	9.13483	0.728074	8.73499	4.4092	0.00147546	0.016284	-1.19565	NonSig	1	Single-promoter
588	ENSG00000086712	TXLNG	chrX	16786464	+	FALSE	1	FB-PB.5253.1	4.53074	4.53074	3.85727	3.85727	Major	Major	4.65494	4.98495	3.94079	4.425	4.64802	3.69835	4.10232	3.85003	3.67191	3.96372	4.65494	4.98495	3.94079	4.425	4.64802	3.69835	4.10232	3.85003	3.67191	3.96372	-0.67347	4.194	-3.45567	0.006613	0.0418574	-2.73714	NonSig	1	Single-promoter
589	ENSG00000086827	ZW10	chr11	113773708	-	FALSE	1	FB-PB.1037.1	3.8137	3.8137	3.05961	3.05961	Major	Major	4.37244	3.84972	3.31801	4.35453	3.17378	3.28001	1.65846	3.60687	2.88882	3.8639	4.37244	3.84972	3.31801	4.35453	3.17378	3.28001	1.65846	3.60687	2.88882	3.8639	-0.754084	3.43665	-1.74975	0.112195	0.261655	-5.5044	NonSig	1	Single-promoter
590	ENSG00000087053	MTMR2	chr11	95924112	-	FALSE	1	FB-PB.1010.2,FB-PB.1010.1,FB-PB.1010.3	5.67276	5.67276	6.37123	6.37123	Major	Major	6.52975	5.58376	5.95456	4.67679	5.61896	6.16587	6.31693	6.40095	6.50292	6.46949	6.52975	5.58376	5.95456	4.67679	5.61896	6.16587	6.31693	6.40095	6.50292	6.46949	0.698468	6.022	2.37083	0.0403665	0.136341	-4.54263	NonSig	1	Single-promoter
591	ENSG00000087087	SRRT	chr7	100875111	+	FALSE	1	FB-PB.4595.1,FB-PB.4595.2	6.52736	6.52736	6.45447	6.45447	Major	Major	5.99373	7.18699	6.38458	6.69217	6.37932	6.83639	6.44745	6.1665	6.80798	6.01404	5.99373	7.18699	6.38458	6.69217	6.37932	6.83639	6.44745	6.1665	6.80798	6.01404	-0.0728865	6.49091	-0.28896	0.778795	0.877906	-6.91066	NonSig	1	Single-promoter
592	ENSG00000087111	PIGS	chr17	28571512	-	FALSE	1	FB-PB.2137.1	4.20853	4.20853	4.30646	4.30646	Major	Major	5.13131	2.27306	4.75603	4.35453	4.52771	4.9264	3.42029	4.54641	4.25943	4.37975	5.13131	2.27306	4.75603	4.35453	4.52771	4.9264	3.42029	4.54641	4.25943	4.37975	0.0979306	4.25749	0.188503	0.854433	0.930166	-6.93676	NonSig	1	Single-promoter
593	ENSG00000087245	MMP2	chr16	55479287	+	FALSE	1	FB-PB.1989.1	11.0686	11.0686	10.2898	10.2898	Major	Major	11.2124	10.7928	11.2333	11.226	10.8785	10.1441	10.4708	9.96696	10.6653	10.2016	11.2124	10.7928	11.2333	11.226	10.8785	10.1441	10.4708	9.96696	10.6653	10.2016	-0.778842	10.6792	-4.64056	0.00104457	0.0133159	-0.838195	NonSig	1	Single-promoter
594	ENSG00000087263	OGFOD1	chr16	56451537	+	FALSE	1	FB-PB.1992.1,FB-PB.1992.2	4.94801	10.5288	5.48741	11.9338	Minor	Minor	4.54849	5.66776	4.65688	4.73343	5.13349	5.02622	5.80731	5.69206	5.17937	5.73206	10.2005	11.5143	10.5691	10.4675	9.89256	11.4147	12.1046	12.4418	11.5582	12.1497	0.539395	5.21771	2.12629	0.0607019	0.17815	-4.93406	NonSig	2	Multiple-promoter
595	ENSG00000087263	OGFOD1	chr16	56467968	+	TRUE	2	FB-PB.1992.3	5.58078	10.5288	6.4464	11.9338	NA	NA	5.65196	5.84659	5.91219	5.73408	4.75906	6.38852	6.29728	6.74976	6.37883	6.41763	10.2005	11.5143	10.5691	10.4675	9.89256	11.4147	12.1046	12.4418	11.5582	12.1497	0.865626	6.01359	3.87938	0.00334696	0.0272627	-2.04023	NonSig	2	Multiple-promoter
596	ENSG00000087303	NID2	chr14	52069066	-	FALSE	1	FB-PB.1589.1	5.06086	5.06086	6.2875	6.2875	Major	Major	4.89108	4.58502	5.05755	5.24283	5.5278	6.27135	6.21589	6.58026	6.22258	6.14739	4.89108	4.58502	5.05755	5.24283	5.5278	6.27135	6.21589	6.58026	6.22258	6.14739	1.22664	5.67418	6.69157	6.79889e-05	0.00236901	1.99339	UpReg	1	Single-promoter
597	ENSG00000087338	GMCL1	chr2	69829660	+	FALSE	1	FB-PB.2740.1,FB-PB.2740.2	0.867067	0.867067	1.93353	1.93353	Major	Major	1.48133	0.969653	1.88435	0	0	2.09343	2.90118	1.9936	1.64871	1.03072	1.48133	0.969653	1.88435	0	0	2.09343	2.90118	1.9936	1.64871	1.03072	1.06646	1.4003	2.33636	0.0427664	0.141867	-4.59853	NonSig	1	Single-promoter
598	ENSG00000087365	SF3B2	chr11	66052366	+	FALSE	1	FB-PB.961.1	6.33337	6.33337	6.47155	6.47155	Major	Major	5.79852	6.31445	6.46004	6.66331	6.43055	6.6766	6.59958	6.29535	6.28317	6.50306	5.79852	6.31445	6.46004	6.66331	6.43055	6.6766	6.59958	6.29535	6.28317	6.50306	0.138181	6.40246	0.791568	0.447852	0.631181	-6.62401	NonSig	1	Single-promoter
599	ENSG00000087460	GNAS	chr20	58889121	+	FALSE	1	FB-PB.3121.2,FB-PB.3121.1,FB-PB.3121.3	2.24052	11.8938	3.06456	13.0776	Minor	Minor	0	3.26684	0.923938	3.20045	3.81138	2.68841	2.67627	3.69256	2.88882	3.37677	9.40599	12.878	10.5143	13.1204	13.5504	12.9043	12.5631	13.6509	12.7891	13.4805	0.824042	2.65254	1.15243	0.27721	0.467949	-6.27581	NonSig	2	Multiple-promoter
600	ENSG00000087460	GNAS	chr20	58891678	+	FALSE	2	FB-PB.3121.12,FB-PB.3121.13,FB-PB.3121.14,FB-PB.3121.15,FB-PB.3121.16,FB-PB.3121.19,FB-PB.3121.20,FB-PB.3121.17,FB-PB.3121.18	9.6533	11.8938	10.013	13.0776	Major	Major	9.40599	9.61116	9.59035	9.91995	9.73904	10.2159	9.88685	9.95833	9.90024	10.1038	9.40599	12.878	10.5143	13.1204	13.5504	12.9043	12.5631	13.6509	12.7891	13.4805	0.359726	9.83316	2.75593	0.0211319	0.0919941	-3.90719	NonSig	2	Multiple-promoter
601	ENSG00000087470	DNM1L	chr12	32679255	+	FALSE	1	FB-PB.1152.1,FB-PB.1152.2	4.12401	4.12401	4.81794	4.81794	Major	Major	3.66089	4.89487	3.7615	3.83923	4.46357	5.20726	4.27298	4.98041	4.48255	5.14651	3.66089	4.89487	3.7615	3.83923	4.46357	5.20726	4.27298	4.98041	4.48255	5.14651	0.693932	4.47098	2.38896	0.0391577	0.133177	-4.51315	NonSig	1	Single-promoter
602	ENSG00000087502	ERGIC2	chr12	29381158	-	FALSE	1	FB-PB.1143.1	5.04543	5.04543	5.45894	5.45894	Major	Major	4.75408	5.06973	5.40174	4.78793	5.21367	5.20726	5.10561	5.75317	5.26198	5.9667	4.75408	5.06973	5.40174	4.78793	5.21367	5.20726	5.10561	5.75317	5.26198	5.9667	0.413514	5.25219	1.96279	0.079473	0.213271	-5.18749	NonSig	1	Single-promoter
603	ENSG00000087510	TFAP2C	chr20	56629278	+	FALSE	1	FB-PB.3117.1,FB-PB.3117.3,FB-PB.3117.2	5.32264	5.32264	4.55093	4.55093	Major	Major	5.45974	6.18741	5.54725	4.89111	4.52771	5.02622	4.74855	3.51577	5.70744	3.75666	5.45974	6.18741	5.54725	4.89111	4.52771	5.02622	4.74855	3.51577	5.70744	3.75666	-0.771718	4.93678	-1.66535	0.128294	0.28097	-5.62493	NonSig	1	Single-promoter
604	ENSG00000087903	RFX2	chr19	6110533	-	FALSE	1	FB-PB.2439.1,FB-PB.2439.2	3.57972	3.57972	3.08043	3.08043	Major	Major	3.75963	3.84972	3.7615	4.20234	2.3254	2.09343	3.26711	3.20184	3.08311	3.75666	3.75963	3.84972	3.7615	4.20234	2.3254	2.09343	3.26711	3.20184	3.08311	3.75666	-0.499287	3.33007	-1.25726	0.238575	0.424303	-6.15596	NonSig	1	Single-promoter
605	ENSG00000087995	METTL2A	chr17	62423892	+	FALSE	1	FB-PB.2253.1	3.54235	3.54235	2.29247	2.29247	Major	Major	4.6027	3.75048	2.86414	3.49064	3.00379	3.28001	1.65846	3.85003	1.04808	1.62578	4.6027	3.75048	2.86414	3.49064	3.00379	3.28001	1.65846	3.85003	1.04808	1.62578	-1.24988	2.91741	-2.17187	0.0562786	0.170138	-4.86211	NonSig	1	Single-promoter
606	ENSG00000088205	DDX18	chr2	117814701	+	FALSE	1	FB-PB.2809.1	5.17944	5.17944	5.51739	5.51739	Major	Major	5.43007	5.02796	5.40174	5.03323	5.0042	6.02819	4.80529	5.93997	5.58442	5.22907	5.43007	5.02796	5.40174	5.03323	5.0042	6.02819	4.80529	5.93997	5.58442	5.22907	0.337948	5.34841	1.394	0.194941	0.371849	-5.98868	NonSig	1	Single-promoter
607	ENSG00000088256	GNA11	chr19	3094603	+	FALSE	1	FB-PB.2421.1	5.62402	5.62402	6.14809	6.14809	Major	Major	5.09395	5.79772	5.40174	5.89169	5.935	6.00391	6.29728	6.30898	6.07043	6.05987	5.09395	5.79772	5.40174	5.89169	5.935	6.00391	6.29728	6.30898	6.07043	6.05987	0.524074	5.88606	2.8764	0.0172639	0.0803323	-3.70586	NonSig	1	Single-promoter
608	ENSG00000088325	TPX2	chr20	31739267	+	FALSE	1	FB-PB.3058.1,FB-PB.3058.3,FB-PB.3058.2,FB-PB.3058.5,FB-PB.3058.4,FB-PB.3058.6,FB-PB.3058.7	1.16398	1.16398	4.94357	4.94357	Major	Major	0	1.54436	0.923938	2.34943	1.00217	4.81916	4.42556	5.2863	4.99844	5.18838	0	1.54436	0.923938	2.34943	1.00217	4.81916	4.42556	5.2863	4.99844	5.18838	3.77959	3.05377	9.683	3.04958e-06	0.000568965	5.15402	UpReg	1	Single-promoter
609	ENSG00000088812	ATRN	chr20	3471039	+	FALSE	1	FB-PB.3028.1	4.89429	4.89429	4.64295	4.64295	Major	Major	5.20325	4.84763	5.33916	4.61784	4.46357	4.81916	4.74855	4.83725	4.84609	3.96372	5.20325	4.84763	5.33916	4.61784	4.46357	4.81916	4.74855	4.83725	4.84609	3.96372	-0.251338	4.76862	-1.06824	0.311705	0.504028	-6.36634	NonSig	1	Single-promoter
610	ENSG00000088832	FKBP1A	chr20	1393101	-	FALSE	1	FB-PB.3018.1	6.95429	6.95429	7.66252	7.66252	Major	Major	7.31017	6.18741	7.18451	6.97653	7.11283	7.74472	7.62402	7.67098	7.51192	7.76096	7.31017	6.18741	7.18451	6.97653	7.11283	7.74472	7.62402	7.67098	7.51192	7.76096	0.708229	7.30841	3.43442	0.00684641	0.0427819	-2.77246	NonSig	1	Single-promoter
611	ENSG00000088833	NSFL1C	chr20	1466848	-	FALSE	1	FB-PB.3020.1	5.17758	5.17758	5.28627	5.28627	Major	Major	5.20325	5.26215	5.20522	4.89111	5.32616	5.07365	5.10561	5.84959	4.41194	5.99056	5.20325	5.26215	5.20522	4.89111	5.32616	5.07365	5.10561	5.84959	4.41194	5.99056	0.108696	5.23192	0.380256	0.712086	0.836161	-6.87761	NonSig	1	Single-promoter
612	ENSG00000088854	DNAAF9	chr20	3407633	-	FALSE	1	FB-PB.3027.1	4.69895	4.69895	4.20995	4.20995	Major	Major	4.24189	4.46494	5.09591	4.9874	4.70461	4.02226	4.91249	3.20184	4.94942	3.96372	4.24189	4.46494	5.09591	4.9874	4.70461	4.02226	4.91249	3.20184	4.94942	3.96372	-0.489001	4.45445	-1.41766	0.188125	0.36309	-5.95858	NonSig	1	Single-promoter
613	ENSG00000088888	MAVS	chr20	3846834	+	FALSE	1	FB-PB.3033.1,FB-PB.3033.2	3.34243	3.34243	3.16746	3.16746	Major	Major	3.03003	2.94647	4.43547	2.8368	3.46337	3.43334	3.42029	2.45245	3.8954	2.63581	3.03003	2.94647	4.43547	2.8368	3.46337	3.43334	3.42029	2.45245	3.8954	2.63581	-0.17497	3.25494	-0.466257	0.651498	0.795193	-6.8385	NonSig	1	Single-promoter
614	ENSG00000088930	XRN2	chr20	21303324	+	FALSE	1	FB-PB.3046.1,FB-PB.3046.2,FB-PB.3046.3	5.71784	5.71784	6.66089	6.66089	Major	Major	5.30485	5.91693	5.20522	6.20375	5.95846	6.42556	6.64692	6.85572	6.43332	6.94294	5.30485	5.91693	5.20522	6.20375	5.95846	6.42556	6.64692	6.85572	6.43332	6.94294	0.94305	6.18937	4.25409	0.0018678	0.0187008	-1.43931	NonSig	1	Single-promoter
616	ENSG00000089154	GCN1	chr12	120194706	-	FALSE	1	FB-PB.1361.1	2.25301	2.25301	3.65664	3.65664	Major	Major	0	3.40377	3.4423	1.60792	2.81107	3.43334	4.19017	2.94676	3.40734	4.30559	0	3.40377	3.4423	1.60792	2.81107	3.43334	4.19017	2.94676	3.40734	4.30559	1.40363	2.95483	2.16262	0.0571499	0.171562	-4.87675	NonSig	1	Single-promoter
617	ENSG00000089159	PXN	chr12	120265773	-	FALSE	1	FB-PB.1363.1,FB-PB.1363.4,FB-PB.1363.2,FB-PB.1363.3,FB-PB.1363.6	5.06906	5.06906	5.10975	5.10975	Major	Major	4.65494	4.11206	5.27374	5.49296	5.81161	5.73557	5.0597	4.67829	4.84609	5.22907	4.65494	4.11206	5.27374	5.49296	5.81161	5.73557	5.0597	4.67829	4.84609	5.22907	0.0406836	5.0894	0.120803	0.906354	0.961642	-6.94819	NonSig	1	Single-promoter
618	ENSG00000089177	KIF16B	chr20	16573442	-	FALSE	1	FB-PB.3039.1	2.77679	2.77679	3.17779	3.17779	Major	Major	3.18019	0	3.7615	3.61643	3.32583	3.10843	3.09572	2.63669	3.40734	3.6408	3.18019	0	3.7615	3.61643	3.32583	3.10843	3.09572	2.63669	3.40734	3.6408	0.401004	2.97729	0.601397	0.561597	0.725944	-6.76185	NonSig	1	Single-promoter
619	ENSG00000089220	PEBP1	chr12	118136097	+	FALSE	1	FB-PB.1356.1	7.47959	7.47959	6.66774	6.66774	Major	Major	7.26886	7.62546	7.80431	7.3287	7.37063	7.05304	6.78029	6.58026	6.61717	6.30795	7.26886	7.62546	7.80431	7.3287	7.37063	7.05304	6.78029	6.58026	6.61717	6.30795	-0.81185	7.07367	-4.78489	0.000845407	0.0115204	-0.618995	NonSig	1	Single-promoter
620	ENSG00000089234	BRAP	chr12	111685979	-	FALSE	1	FB-PB.1343.1,FB-PB.1343.2	3.85741	3.85741	3.77221	3.77221	Major	Major	3.66089	4.52623	4.31056	3.20045	3.58894	3.81459	4.10232	4.40125	2.3981	4.14476	3.66089	4.52623	4.31056	3.20045	3.58894	3.81459	4.10232	4.40125	2.3981	4.14476	-0.085206	3.81481	-0.210455	0.837741	0.919661	-6.93198	NonSig	1	Single-promoter
622	ENSG00000089597	GANAB	chr11	62633047	-	TRUE	2	FB-PB.936.4	6.01344	11.4434	6.85329	13.4171	NA	NA	5.88855	6.29697	5.91219	5.98794	5.98155	6.89037	6.67764	7.24418	6.69357	6.76067	10.7354	11.8219	11.2514	11.722	11.6862	13.26	13.0331	14.0999	12.9767	13.7158	0.839846	6.43336	5.76022	0.000218878	0.00490036	0.782967	NonSig	2	Multiple-promoter
623	ENSG00000089597	GANAB	chr11	62646605	-	FALSE	1	FB-PB.936.2,FB-PB.936.1	5.42994	11.4434	6.56382	13.4171	Minor	Minor	4.84684	5.52492	5.33916	5.73408	5.70469	6.36964	6.35544	6.85572	6.28317	6.95512	10.7354	11.8219	11.2514	11.722	11.6862	13.26	13.0331	14.0999	12.9767	13.7158	1.13388	5.99688	5.27107	0.000423824	0.00749554	0.0972899	UpReg	2	Multiple-promoter
624	ENSG00000089682	RBM41	chrX	107118822	-	FALSE	1	FB-PB.5346.1	2.43318	2.43318	2.52954	2.52954	Major	Major	2.6727	1.95424	2.86414	2.34943	2.3254	2.68841	1.65846	1.9936	3.08311	3.2241	2.6727	1.95424	2.86414	2.34943	2.3254	2.68841	1.65846	1.9936	3.08311	3.2241	0.0963558	2.48136	0.295738	0.773769	0.874676	-6.90851	NonSig	1	Single-promoter
625	ENSG00000089818	NECAP1	chr12	8082275	+	FALSE	1	FB-PB.1106.1	5.03071	5.03071	4.66537	4.66537	Major	Major	5.27178	4.94061	4.60463	4.84044	5.49609	4.64169	4.42556	4.91061	4.89868	4.45028	5.27178	4.94061	4.60463	4.84044	5.49609	4.64169	4.42556	4.91061	4.89868	4.45028	-0.365345	4.84804	-1.88118	0.0907832	0.230967	-5.31086	NonSig	1	Single-promoter
626	ENSG00000089902	RCOR1	chr14	102592655	+	FALSE	1	FB-PB.1701.1	4.96938	4.96938	4.27303	4.27303	Major	Major	5.16773	5.49458	4.80316	4.73343	4.64802	4.28662	4.56355	4.23984	3.8954	4.37975	5.16773	5.49458	4.80316	4.73343	4.64802	4.28662	4.56355	4.23984	3.8954	4.37975	-0.696351	4.62121	-3.54254	0.0057415	0.0382571	-2.59303	NonSig	1	Single-promoter
627	ENSG00000089916	GPATCH2L	chr14	76151905	+	FALSE	1	FB-PB.1662.1	4.57478	4.57478	4.46831	4.46831	Major	Major	4.1719	4.84763	4.37437	4.61784	4.86217	4.43928	4.4962	4.79912	4.54987	4.05708	4.1719	4.84763	4.37437	4.61784	4.86217	4.43928	4.4962	4.79912	4.54987	4.05708	-0.106471	4.52155	-0.571333	0.580987	0.73906	-6.78047	NonSig	1	Single-promoter
628	ENSG00000090006	LTBP4	chr19	40597211	+	FALSE	1	FB-PB.2543.1	1.58567	1.58567	0.961537	0.961537	Major	Major	2.8624	0	2.45587	1.60792	1.00217	0	2.08243	1.69453	0	1.03072	2.8624	0	2.45587	1.60792	1.00217	0	2.08243	1.69453	0	1.03072	-0.624134	1.2736	-1.01193	0.336553	0.52808	-6.42387	NonSig	1	Single-promoter
629	ENSG00000090060	PAPOLA	chr14	96502393	+	FALSE	1	FB-PB.1688.1,FB-PB.1688.2,FB-PB.1688.4,FB-PB.1688.3,FB-PB.1688.5,FB-PB.1688.6,FB-PB.1688.7	6.06382	6.06382	6.00925	6.00925	Major	Major	6.35126	6.34878	5.95456	5.70606	5.95846	6.1876	5.80731	6.08962	5.79328	6.16847	6.35126	6.34878	5.95456	5.70606	5.95846	6.1876	5.80731	6.08962	5.79328	6.16847	-0.0545685	6.03654	-0.331586	0.747373	0.857705	-6.89632	NonSig	1	Single-promoter
631	ENSG00000090316	MAEA	chr4	1289897	+	FALSE	1	FB-PB.3665.1	4.53491	4.53491	4.74269	4.74269	Major	Major	4.30864	4.7988	4.49409	4.425	4.64802	5.6125	4.19017	4.23984	4.48255	5.18838	4.30864	4.7988	4.49409	4.425	4.64802	5.6125	4.19017	4.23984	4.48255	5.18838	0.20778	4.6388	0.73446	0.480337	0.657568	-6.66895	NonSig	1	Single-promoter
632	ENSG00000090376	IRAK3	chr12	66189171	+	FALSE	1	FB-PB.1238.1,FB-PB.1238.2	4.36418	4.36418	4.36983	4.36983	Major	Major	4.09833	3.84972	4.55042	4.61784	4.70461	3.69835	4.4962	4.63566	4.79152	4.22742	4.09833	3.84972	4.55042	4.61784	4.70461	3.69835	4.4962	4.63566	4.79152	4.22742	0.00564563	4.36701	0.0227701	0.982303	1	-6.95589	NonSig	1	Single-promoter
633	ENSG00000090612	ZNF268	chr12	133181492	+	FALSE	1	FB-PB.1396.1	3.28344	3.28344	2.0592	2.0592	Major	Major	4.75408	4.0298	3.4423	1.01725	3.17378	2.68841	1.05547	0.803701	2.88882	2.85963	4.75408	4.0298	3.4423	1.01725	3.17378	2.68841	1.05547	0.803701	2.88882	2.85963	-1.22424	2.67132	-1.69888	0.121662	0.273949	-5.57742	NonSig	1	Single-promoter
634	ENSG00000090686	USP48	chr1	21783149	-	FALSE	1	FB-PB.59.1,FB-PB.59.2	4.79171	4.79171	5.14375	5.14375	Major	Major	3.55488	5.1498	5.46172	4.78793	5.0042	4.64169	5.0597	5.25847	5.41424	5.34468	3.55488	5.1498	5.46172	4.78793	5.0042	4.64169	5.0597	5.25847	5.41424	5.34468	0.352049	4.96773	1.04275	0.322775	0.514078	-6.39269	NonSig	1	Single-promoter
635	ENSG00000090776	EFNB1	chrX	68828991	+	FALSE	1	FB-PB.5308.1,FB-PB.5308.3,FB-PB.5308.2,FB-PB.5308.4	5.57879	5.57879	5.03298	5.03298	Major	Major	5.62602	6.34878	5.67943	5.28133	4.95839	4.87378	4.85989	5.46739	4.73479	5.22907	5.62602	6.34878	5.67943	5.28133	4.95839	4.87378	4.85989	5.46739	4.73479	5.22907	-0.545808	5.30589	-2.08759	0.0647188	0.185492	-4.99473	NonSig	1	Single-promoter
636	ENSG00000090861	AARS1	chr16	70289537	-	FALSE	1	FB-PB.2027.1,FB-PB.2027.2	2.84066	2.84066	2.8338	2.8338	Major	Major	4.02082	2.27306	3.55673	2.34943	2.00325	2.68841	2.90118	2.63669	3.08311	2.85963	4.02082	2.27306	3.55673	2.34943	2.00325	2.68841	2.90118	2.63669	3.08311	2.85963	-0.00685516	2.83723	-0.0179501	0.986049	1	-6.956	NonSig	1	Single-promoter
637	ENSG00000090863	GLG1	chr16	74493124	-	TRUE	2	FB-PB.2038.4	7.22903	13.1471	7.40865	13.1121	NA	NA	7.09065	7.26996	7.30401	7.16334	7.31719	7.40792	7.32735	7.50918	7.69404	7.10475	13.144	12.6363	13.4166	13.1513	13.3876	12.6152	13.3414	13.2012	13.4307	12.9718	0.179618	7.31884	1.37159	0.201593	0.379865	-6.0169	NonSig	2	Multiple-promoter
638	ENSG00000090863	GLG1	chr16	74607114	-	FALSE	1	FB-PB.2038.1,FB-PB.2038.2,FB-PB.2038.3,FB-PB.2038.5,FB-PB.2038.6	5.91812	13.1471	5.70341	13.1121	Minor	Minor	6.05334	5.36638	6.11257	5.98794	6.07036	5.20726	6.01403	5.69206	5.73663	5.8671	13.144	12.6363	13.4166	13.1513	13.3876	12.6152	13.3414	13.2012	13.4307	12.9718	-0.214703	5.81077	-1.08185	0.305916	0.497811	-6.35207	NonSig	2	Multiple-promoter
639	ENSG00000090889	KIF4A	chrX	70290056	+	FALSE	1	FB-PB.5309.1,FB-PB.5309.2	0	0	2.35881	2.35881	Inactive	Major	0	0	0	0	0	2.91365	1.65846	3.31424	1.04808	2.85963	0	0	0	0	0	2.91365	1.65846	3.31424	1.04808	2.85963	2.35881	1.17941	5.86254	0.000191421	0.00449095	0.921977	UpReg	1	Single-promoter
641	ENSG00000091073	DTX2	chr7	76461701	+	FALSE	1	FB-PB.4547.1	1.01968	1.01968	1.29942	1.29942	Major	Major	0	0	1.48263	2.6136	1.00217	1.6683	1.05547	1.69453	1.04808	1.03072	0	0	1.48263	2.6136	1.00217	1.6683	1.05547	1.69453	1.04808	1.03072	0.279742	1.15955	0.582361	0.573832	0.733771	-6.77374	NonSig	1	Single-promoter
642	ENSG00000091129	NRCAM	chr7	108456496	-	FALSE	1	FB-PB.4614.1	0.816221	0.816221	0.820233	0.820233	Major	Major	1.88288	0	2.19823	0	0	0	0	2.45245	1.64871	0	1.88288	0	2.19823	0	0	0	0	2.45245	1.64871	0	0.00401193	0.818227	0.00601839	0.995322	1	-6.95616	NonSig	1	Single-promoter
643	ENSG00000091136	LAMB1	chr7	108003190	-	FALSE	1	FB-PB.4613.1	4.83596	4.83596	5.80988	5.80988	Major	Major	4.89108	5.06973	4.37437	4.84044	5.0042	5.70577	5.77926	5.84959	5.67766	6.03714	4.89108	5.06973	4.37437	4.84044	5.0042	5.70577	5.77926	5.84959	5.67766	6.03714	0.97392	5.32292	6.34699	0.000103425	0.00306398	1.55974	NonSig	1	Single-promoter
644	ENSG00000091140	DLD	chr7	107891149	+	FALSE	1	FB-PB.4616.1,FB-PB.4616.2	4.63817	4.63817	5.38889	5.38889	Major	Major	5.5727	4.74825	5.13327	4.03217	3.70444	5.28991	5.2759	5.51521	5.51874	5.34468	5.5727	4.74825	5.13327	4.03217	3.70444	5.28991	5.2759	5.51521	5.51874	5.34468	0.75072	5.01353	2.27039	0.047756	0.152157	-4.70492	NonSig	1	Single-promoter
645	ENSG00000091317	CMTM6	chr3	32502827	-	FALSE	1	FB-PB.3350.1,FB-PB.3350.2	5.86207	5.86207	5.77796	5.77796	Major	Major	6.12917	5.66776	6.07466	5.73408	5.70469	5.58002	6.01403	6.1665	5.48474	5.64453	6.12917	5.66776	6.07466	5.73408	5.70469	5.58002	6.01403	6.1665	5.48474	5.64453	-0.0841093	5.82002	-0.482361	0.640428	0.789056	-6.83033	NonSig	1	Single-promoter
646	ENSG00000091436	MAP3K20	chr2	173075836	+	FALSE	1	FB-PB.2876.1,FB-PB.2876.2,FB-PB.2876.3,FB-PB.2876.4	6.06646	6.06646	5.50518	5.50518	Major	Major	6.45804	6.06883	5.91219	5.86659	6.02664	5.51277	5.49871	5.53854	5.30158	5.6743	6.45804	6.06883	5.91219	5.86659	6.02664	5.51277	5.49871	5.53854	5.30158	5.6743	-0.561279	5.78582	-3.99866	0.00277411	0.0243672	-1.84716	NonSig	1	Single-promoter
648	ENSG00000091542	ALKBH5	chr17	18183479	+	FALSE	1	FB-PB.2123.1,FB-PB.2123.2,FB-PB.2123.3,FB-PB.2123.4	7.14241	7.14241	6.51497	6.51497	Major	Major	7.1646	7.119	7.13931	7.45195	6.83719	6.53127	6.67764	6.6675	6.46854	6.2299	7.1646	7.119	7.13931	7.45195	6.83719	6.53127	6.67764	6.6675	6.46854	6.2299	-0.627438	6.82869	-4.31866	0.00169249	0.0177779	-1.3375	NonSig	1	Single-promoter
649	ENSG00000091844	RGS17	chr6	153131240	-	FALSE	1	FB-PB.4402.2	1.04216	1.04216	2.32903	2.32903	Major	Major	0	2.75493	2.45587	0	0	3.28001	2.67627	2.80004	2.88882	0	0	2.75493	2.45587	0	0	3.28001	2.67627	2.80004	2.88882	0	1.28687	1.68559	1.60357	0.141369	0.300563	-5.71108	NonSig	1	Single-promoter
651	ENSG00000091986	CCDC80	chr3	112641143	-	FALSE	1	FB-PB.3479.1,FB-PB.3479.2,FB-PB.3479.8,FB-PB.3479.4	10.1061	10.1061	9.05521	9.05521	Major	Major	9.59336	9.87388	10.2318	10.4511	10.3805	8.78832	9.07735	9.61306	8.95859	8.83875	9.59336	9.87388	10.2318	10.4511	10.3805	8.78832	9.07735	9.61306	8.95859	8.83875	-1.0509	9.58066	-4.79376	0.000834568	0.011433	-0.605619	DownReg	1	Single-promoter
652	ENSG00000092068	SLC7A8	chr14	23154380	-	FALSE	1	FB-PB.1541.1	1.99102	1.99102	2.23211	2.23211	Major	Major	0.922984	2.75493	0.923938	2.34943	3.00379	1.06295	1.65846	3.31424	2.07153	3.05334	0.922984	2.75493	0.923938	2.34943	3.00379	1.06295	1.65846	3.31424	2.07153	3.05334	0.24109	2.11156	0.422484	0.682038	0.814801	-6.85936	NonSig	1	Single-promoter
653	ENSG00000092108	SCFD1	chr14	30622304	+	FALSE	1	FB-PB.1557.1	4.01282	4.01282	4.30548	4.30548	Major	Major	3.75963	3.52883	3.7615	4.425	4.58912	4.57732	4.27298	3.92276	3.99538	4.75895	3.75963	3.52883	3.7615	4.425	4.58912	4.57732	4.27298	3.92276	3.99538	4.75895	0.292662	4.15915	1.14174	0.281417	0.472	-6.28759	NonSig	1	Single-promoter
654	ENSG00000092140	G2E3	chr14	30559158	+	FALSE	1	FB-PB.1553.1	3.7214	3.7214	4.2708	4.2708	Major	Major	2.45422	4.84763	3.7615	3.83923	3.70444	4.43928	4.10232	4.05806	3.99538	4.75895	2.45422	4.84763	3.7615	3.83923	3.70444	4.43928	4.10232	4.05806	3.99538	4.75895	0.549394	3.9961	1.43682	0.182753	0.356942	-5.93394	NonSig	1	Single-promoter
655	ENSG00000092199	HNRNPC	chr14	21269457	-	FALSE	1	FB-PB.1531.1,FB-PB.1531.3,FB-PB.1531.5,FB-PB.1531.6,FB-PB.1531.4	10.124	10.124	10.353	10.353	Major	Major	9.95812	10.3513	9.54601	10.4405	10.324	10.4906	10.3268	10.5148	10.1029	10.3299	9.95812	10.3513	9.54601	10.4405	10.324	10.4906	10.3268	10.5148	10.1029	10.3299	0.229017	10.2385	1.21862	0.252274	0.440075	-6.20103	NonSig	1	Single-promoter
656	ENSG00000092201	SUPT16H	chr14	21384048	-	FALSE	1	FB-PB.1533.1,FB-PB.1533.2,FB-PB.1533.3,FB-PB.1533.4,FB-PB.1533.5	4.42674	4.42674	5.19241	5.19241	Major	Major	3.66089	4.58502	5.23989	4.55638	4.09154	4.81916	5.53271	5.44287	4.89868	5.26865	3.66089	4.58502	5.23989	4.55638	4.09154	4.81916	5.53271	5.44287	4.89868	5.26865	0.765672	4.80958	2.64915	0.0252872	0.102562	-4.08492	NonSig	1	Single-promoter
657	ENSG00000092203	TOX4	chr14	21477224	+	FALSE	1	FB-PB.1534.1,FB-PB.1534.2	4.02916	4.02916	3.81567	3.81567	Major	Major	4.37244	4.18988	3.31801	4.35453	3.91094	4.11587	4.27298	4.05806	3.40734	3.2241	4.37244	4.18988	3.31801	4.35453	3.91094	4.11587	4.27298	4.05806	3.40734	3.2241	-0.213489	3.92241	-0.771915	0.458864	0.640253	-6.63981	NonSig	1	Single-promoter
658	ENSG00000092439	TRPM7	chr15	50686832	-	FALSE	1	FB-PB.1769.1	3.85457	3.85457	3.42379	3.42379	Major	Major	3.9389	3.75048	3.31801	4.35453	3.91094	3.69835	3.42029	3.69256	3.67191	2.63581	3.9389	3.75048	3.31801	4.35453	3.91094	3.69835	3.42029	3.69256	3.67191	2.63581	-0.430785	3.63918	-1.67934	0.125489	0.278248	-5.60517	NonSig	1	Single-promoter
659	ENSG00000092820	EZR	chr6	158818235	-	TRUE	2	FB-PB.4416.2	7.43644	11.6094	6.53966	10.0791	NA	NA	7.31017	8.50106	6.86728	7.31948	7.18421	6.61381	6.70772	6.2395	6.56931	6.56794	11.2491	13.4417	10.53	11.9373	10.8887	10.1857	11.059	9.55374	9.65242	9.94471	-0.896785	6.98805	-3.21428	0.00983226	0.054105	-3.13983	NonSig	2	Multiple-promoter
660	ENSG00000092820	EZR	chr6	158819364	-	FALSE	1	FB-PB.4416.1	4.17291	11.6094	3.53947	10.0791	Minor	Minor	3.9389	4.94061	3.66274	4.61784	3.70444	3.57192	4.35129	3.31424	3.08311	3.37677	11.2491	13.4417	10.53	11.9373	10.8887	10.1857	11.059	9.55374	9.65242	9.94471	-0.633442	3.85619	-1.97719	0.0776204	0.209329	-5.16549	NonSig	2	Multiple-promoter
661	ENSG00000092964	DPYSL2	chr8	26577926	+	FALSE	1	FB-PB.4756.2,FB-PB.4756.1,FB-PB.4756.3,FB-PB.4756.4	8.13743	8.13743	7.72408	7.72408	Major	Major	7.86463	7.92759	8.46977	8.33339	8.09178	7.54043	7.80883	7.67098	7.88861	7.71156	7.86463	7.92759	8.46977	8.33339	8.09178	7.54043	7.80883	7.67098	7.88861	7.71156	-0.413352	7.93076	-2.7985	0.0196739	0.0878812	-3.83613	NonSig	1	Single-promoter
662	ENSG00000093000	NUP50	chr22	45163985	+	FALSE	1	FB-PB.3272.1,FB-PB.3272.2,FB-PB.3272.3	5.25237	5.25237	6.14032	6.14032	Major	Major	5.20325	6.36565	5.05755	4.9874	4.64802	6.59768	5.93994	6.1814	5.90032	6.08226	5.20325	6.36565	5.05755	4.9874	4.64802	6.59768	5.93994	6.1814	5.90032	6.08226	0.887946	5.69635	2.91851	0.0160882	0.0764643	-3.63536	NonSig	1	Single-promoter
664	ENSG00000093167	LRRFIP2	chr3	37176319	-	FALSE	1	FB-PB.3363.1,FB-PB.3363.2,FB-PB.3363.3	5.73261	5.73261	5.89444	5.89444	Major	Major	5.82156	6.41509	5.57467	5.94062	4.91108	6.02819	5.91437	5.93997	5.64724	5.94244	5.82156	6.41509	5.57467	5.94062	4.91108	6.02819	5.91437	5.93997	5.64724	5.94244	0.161836	5.81352	0.649476	0.53136	0.701439	-6.73023	NonSig	1	Single-promoter
665	ENSG00000093183	SEC22C	chr3	42581980	-	FALSE	1	FB-PB.3369.1,FB-PB.3369.2	4.52268	4.52268	4.38593	4.38593	Major	Major	3.75963	4.69586	5.20522	4.425	4.52771	4.36497	4.00877	4.12123	4.67574	4.75895	3.75963	4.69586	5.20522	4.425	4.52771	4.36497	4.00877	4.12123	4.67574	4.75895	-0.136749	4.45431	-0.51162	0.620553	0.772094	-6.81481	NonSig	1	Single-promoter
666	ENSG00000094631	HDAC6	chrX	48802030	+	FALSE	1	FB-PB.5283.1	0	0	0.700545	0.700545	Inactive	Major	0	0	0	0	0	1.6683	0	0.803701	0	1.03072	0	0	0	0	0	1.6683	0	0.803701	0	1.03072	0.700545	0.350273	2.29708	0.0456723	0.147888	-4.66198	NonSig	1	Single-promoter
667	ENSG00000094880	CDC23	chr5	138213323	-	FALSE	1	FB-PB.4104.1	2.8659	2.8659	3.59088	3.59088	Major	Major	0	3.11553	3.7615	3.20045	4.25204	3.92216	4.00877	4.40125	2.3981	3.2241	0	3.11553	3.7615	3.20045	4.25204	3.92216	4.00877	4.40125	2.3981	3.2241	0.724975	3.22839	0.953303	0.363972	0.553723	-6.4811	NonSig	1	Single-promoter
668	ENSG00000094975	SUCO	chr1	172533142	+	FALSE	1	FB-PB.403.1	4.74553	4.74553	4.12573	4.12573	Major	Major	4.89108	4.6415	4.55042	4.94005	4.70461	4.36497	4.35129	3.60687	3.78798	4.51753	4.89108	4.6415	4.55042	4.94005	4.70461	4.36497	4.35129	3.60687	3.78798	4.51753	-0.619807	4.43563	-3.13102	0.0112872	0.0597609	-3.27924	NonSig	1	Single-promoter
669	ENSG00000095002	MSH2	chr2	47403102	+	FALSE	1	FB-PB.2703.1	3.46868	3.46868	3.00246	3.00246	Major	Major	4.02082	2.75493	3.66274	3.20045	3.70444	0	4.19017	3.77344	3.67191	3.37677	4.02082	2.75493	3.66274	3.20045	3.70444	0	4.19017	3.77344	3.67191	3.37677	-0.466219	3.23557	-0.637114	0.539042	0.707527	-6.73857	NonSig	1	Single-promoter
670	ENSG00000095261	PSMD5	chr9	120842927	-	FALSE	1	FB-PB.5084.1,FB-PB.5084.2,FB-PB.5084.3	3.38439	3.38439	3.88787	3.88787	Major	Major	1.48133	3.64391	4.49409	3.83923	3.46337	4.02226	3.90873	3.20184	4.54987	3.75666	1.48133	3.64391	4.49409	3.83923	3.46337	4.02226	3.90873	3.20184	4.54987	3.75666	0.503486	3.63613	0.982766	0.349996	0.539498	-6.45269	NonSig	1	Single-promoter
671	ENSG00000095303	PTGS1	chr9	122371021	+	FALSE	1	FB-PB.5091.1	3.06043	3.06043	3.31478	3.31478	Major	Major	3.31619	3.75048	3.0318	3.20045	2.00325	4.11587	3.26711	1.9936	4.3377	2.85963	3.31619	3.75048	3.0318	3.20045	2.00325	4.11587	3.26711	1.9936	4.3377	2.85963	0.254348	3.18761	0.52945	0.608595	0.761327	-6.80493	NonSig	1	Single-promoter
672	ENSG00000095319	NUP188	chr9	128947704	+	FALSE	1	FB-PB.5125.1	3.77872	8.37673	5.00393	10.8562	Minor	Minor	3.66089	4.18988	2.19823	5.03323	3.81138	4.76239	4.85989	4.98041	4.54987	5.8671	9.17821	8.88574	6.57259	8.97216	8.27495	10.6114	10.7743	11.3686	10.3151	11.2118	1.22521	4.39133	2.5588	0.0294373	0.113027	-4.23455	NonSig	2	Multiple-promoter
673	ENSG00000095319	NUP188	chr9	128988083	+	TRUE	2	FB-PB.5125.2	4.59801	8.37673	5.85228	10.8562	NA	NA	5.51733	4.69586	4.37437	3.93892	4.46357	5.84896	5.91437	6.38817	5.76523	5.34468	9.17821	8.88574	6.57259	8.97216	8.27495	10.6114	10.7743	11.3686	10.3151	11.2118	1.25427	5.22515	4.23305	0.00192901	0.0190375	-1.4726	UpReg	2	Multiple-promoter
674	ENSG00000095564	BTAF1	chr10	91923778	+	FALSE	1	FB-PB.713.1,FB-PB.713.2,FB-PB.713.3	4.76534	4.76534	4.34023	4.34023	Major	Major	5.05559	5.58376	3.85393	4.11976	5.21367	4.64169	4.19017	4.63566	4.08887	4.14476	5.05559	5.58376	3.85393	4.11976	5.21367	4.64169	4.19017	4.63566	4.08887	4.14476	-0.425115	4.55279	-1.26695	0.235236	0.421039	-6.1445	NonSig	1	Single-promoter
675	ENSG00000095574	IKZF5	chr10	123008812	-	FALSE	1	FB-PB.800.2	4.41735	4.41735	4.01703	4.01703	Major	Major	4.09833	5.36638	3.31801	4.84044	4.46357	4.36497	4.10232	4.49963	3.25432	3.8639	4.09833	5.36638	3.31801	4.84044	4.46357	4.36497	4.10232	4.49963	3.25432	3.8639	-0.400318	4.21719	-1.03916	0.324357	0.515759	-6.39636	NonSig	1	Single-promoter
676	ENSG00000095787	WAC	chr10	28533244	+	FALSE	1	FB-PB.601.4	6.98355	6.98355	6.23618	6.23618	Major	Major	7.03259	6.95037	6.95336	7.26289	6.71854	6.27135	6.10725	6.49935	6.24306	6.05987	7.03259	6.95037	6.95336	7.26289	6.71854	6.27135	6.10725	6.49935	6.24306	6.05987	-0.747373	6.60986	-5.43556	0.000338106	0.00639209	0.331789	NonSig	1	Single-promoter
677	ENSG00000096060	FKBP5	chr6	35619141	-	TRUE	2	FB-PB.4230.2	6.5523	11.1934	6.275	10.7934	NA	NA	6.26983	6.56864	6.81075	6.30064	6.81165	6.58136	6.39295	5.83081	6.24306	6.32682	10.6423	10.6807	11.8289	11.1411	11.6738	10.9463	11.1982	9.88887	11.0892	10.8443	-0.277304	6.41365	-1.54705	0.154361	0.319655	-5.78826	NonSig	2	Multiple-promoter
678	ENSG00000096060	FKBP5	chr6	35688915	-	FALSE	1	FB-PB.4230.1,FB-PB.4230.3,FB-PB.4230.4,FB-PB.4230.5	4.64105	11.1934	4.51839	10.7934	Minor	Minor	4.37244	4.11206	5.01815	4.84044	4.86217	4.36497	4.80529	4.05806	4.84609	4.51753	10.6423	10.6807	11.8289	11.1411	11.6738	10.9463	11.1982	9.88887	11.0892	10.8443	-0.122663	4.57972	-0.549564	0.595251	0.750328	-6.7934	NonSig	2	Multiple-promoter
679	ENSG00000096063	SRPK1	chr6	35891013	-	TRUE	2	FB-PB.4233.2	5.05646	8.61236	5.78136	10.3639	NA	NA	5.45974	5.58376	4.97764	4.73343	4.52771	6.09868	5.56594	5.62826	5.64724	5.9667	8.63994	9.22767	7.84177	8.57266	8.77974	10.8611	10.0621	10.0795	9.54264	11.2739	0.724906	5.41891	3.18702	0.010286	0.0558182	-3.18546	NonSig	2	Multiple-promoter
680	ENSG00000096063	SRPK1	chr6	35921098	-	FALSE	1	FB-PB.4233.1,FB-PB.4233.3	3.5559	8.61236	4.58249	10.3639	Minor	Minor	3.18019	3.64391	2.86414	3.83923	4.25204	4.76239	4.4962	4.45128	3.8954	5.30716	8.63994	9.22767	7.84177	8.57266	8.77974	10.8611	10.0621	10.0795	9.54264	11.2739	1.02659	4.06919	3.21805	0.00977107	0.053844	-3.13351	NonSig	2	Multiple-promoter
681	ENSG00000096401	CDC5L	chr6	44387710	+	FALSE	1	FB-PB.4256.1,FB-PB.4256.2	4.41867	4.41867	4.25618	4.25618	Major	Major	3.44047	4.52623	4.55042	4.61784	4.95839	4.7033	3.80124	4.40125	3.99538	4.37975	3.44047	4.52623	4.55042	4.61784	4.95839	4.7033	3.80124	4.40125	3.99538	4.37975	-0.162485	4.33743	-0.559923	0.58844	0.745155	-6.78731	NonSig	1	Single-promoter
682	ENSG00000096433	ITPR3	chr6	33621382	+	FALSE	1	FB-PB.4222.1	4.46767	4.46767	3.58537	3.58537	Major	Major	5.09395	4.58502	4.49409	3.83923	4.32605	3.10843	4.10232	3.07993	4.25943	3.37677	5.09395	4.58502	4.49409	3.83923	4.32605	3.10843	4.10232	3.07993	4.25943	3.37677	-0.882291	4.02652	-2.87236	0.0173811	0.0805503	-3.71262	NonSig	1	Single-promoter
683	ENSG00000096696	DSP	chr6	7541547	+	FALSE	1	FB-PB.4194.1	7.76644	7.76644	7.46074	7.46074	Major	Major	9.25972	10.1687	6.6265	4.94005	7.83721	8.15073	7.27809	5.81179	8.03674	8.02635	9.25972	10.1687	6.6265	4.94005	7.83721	8.15073	7.27809	5.81179	8.03674	8.02635	-0.305703	7.61359	-0.323028	0.753644	0.862568	-6.89936	NonSig	1	Single-promoter
684	ENSG00000096872	IFT74	chr9	26956429	+	FALSE	1	FB-PB.4958.1	3.69986	3.69986	3.22921	3.22921	Major	Major	3.85205	3.26684	3.85393	3.20045	4.32605	3.69835	3.55876	2.94676	2.88882	3.05334	3.85205	3.26684	3.85393	3.20045	4.32605	3.69835	3.55876	2.94676	2.88882	3.05334	-0.470655	3.46453	-1.81063	0.101756	0.247392	-5.4156	NonSig	1	Single-promoter
685	ENSG00000097033	SH3GLB1	chr1	86704829	+	FALSE	1	FB-PB.216.1	7.14567	7.14567	7.23582	7.23582	Major	Major	7.34239	6.61169	7.45182	7.08932	7.23313	7.24136	7.32735	7.20826	7.19197	7.21013	7.34239	6.61169	7.45182	7.08932	7.23313	7.24136	7.32735	7.20826	7.19197	7.21013	0.090145	7.19074	0.559032	0.589024	0.745654	-6.78784	NonSig	1	Single-promoter
686	ENSG00000099194	SCD	chr10	100347110	+	FALSE	1	FB-PB.749.1,FB-PB.749.2,FB-PB.749.3,FB-PB.749.4,FB-PB.749.6,FB-PB.749.5,FB-PB.749.7,FB-PB.749.9,FB-PB.749.8	5.85493	16.2648	6.05103	17.1878	Minor	Minor	5.84424	6.24323	4.80316	5.39102	6.99299	6.27135	6.23667	5.62826	6.41539	5.70347	16.6355	16.9428	13.4602	15.064	19.2213	17.8273	16.8145	16.4459	17.993	16.8583	0.196103	5.95298	0.514587	0.618555	0.770409	-6.81319	NonSig	3	Multiple-promoter
687	ENSG00000099194	SCD	chr10	100348294	+	TRUE	2	FB-PB.749.10	4.52782	16.2648	4.84527	17.1878	NA	NA	5.01619	4.33395	3.85393	3.93892	5.49609	4.81916	4.68948	4.75996	5.09174	4.86603	16.6355	16.9428	13.4602	15.064	19.2213	17.8273	16.8145	16.4459	17.993	16.8583	0.317455	4.68654	1.02483	0.330735	0.522455	-6.41091	NonSig	3	Multiple-promoter
688	ENSG00000099194	SCD	chr10	100356747	+	TRUE	3	FB-PB.749.11	5.88204	16.2648	6.29149	17.1878	NA	NA	5.7751	6.36565	4.80316	5.73408	6.73222	6.73678	5.88834	6.05768	6.48583	6.28883	16.6355	16.9428	13.4602	15.064	19.2213	17.8273	16.8145	16.4459	17.993	16.8583	0.40945	6.08677	1.19758	0.259997	0.449148	-6.22513	NonSig	3	Multiple-promoter
690	ENSG00000099250	NRP1	chr10	33334648	-	FALSE	1	FB-PB.615.1,FB-PB.615.3,FB-PB.615.2,FB-PB.615.4,FB-PB.615.5	8.15692	8.15692	7.77962	7.77962	Major	Major	8.44197	7.9219	7.97351	7.99994	8.44727	7.51489	7.84987	8.04134	7.90798	7.58404	8.44197	7.9219	7.97351	7.99994	8.44727	7.51489	7.84987	8.04134	7.90798	7.58404	-0.377295	7.96827	-2.27263	0.0475771	0.151856	-4.70131	NonSig	1	Single-promoter
691	ENSG00000099284	MACROH2A2	chr10	70052841	+	FALSE	1	FB-PB.666.1	3.08772	3.08772	3.96137	3.96137	Major	Major	3.31619	3.64391	3.31801	2.34943	2.81107	4.28662	3.90873	4.05806	4.17667	3.37677	3.31619	3.64391	3.31801	2.34943	2.81107	4.28662	3.90873	4.05806	4.17667	3.37677	0.873648	3.52455	3.25082	0.00925601	0.0516596	-3.07869	NonSig	1	Single-promoter
692	ENSG00000099290	WASHC2A	chr10	50067926	+	FALSE	1	FB-PB.637.2,FB-PB.637.1,FB-PB.637.3	4.10342	4.10342	4.40314	4.40314	Major	Major	4.75408	3.94257	3.7615	4.35453	3.70444	5.07365	3.90873	4.54641	4.84609	3.6408	4.75408	3.94257	3.7615	4.35453	3.70444	5.07365	3.90873	4.54641	4.84609	3.6408	0.299714	4.25328	0.933052	0.373812	0.561578	-6.50022	NonSig	1	Single-promoter
693	ENSG00000099622	CIRBP	chr19	1269332	+	FALSE	1	FB-PB.2415.1	7.54918	7.54918	7.06585	7.06585	Major	Major	7.50066	7.39022	7.64528	7.26289	7.94683	7.39863	6.72253	6.93697	6.86195	7.40917	7.50066	7.39022	7.64528	7.26289	7.94683	7.39863	6.72253	6.93697	6.86195	7.40917	-0.483328	7.30751	-2.54277	0.0302417	0.11448	-4.261	NonSig	1	Single-promoter
694	ENSG00000099810	MTAP	chr9	21802610	+	FALSE	1	FB-PB.4956.1	5.00934	5.00934	5.2111	5.2111	Major	Major	4.43354	5.22566	5.33916	4.61784	5.4305	5.58002	4.62789	5.36671	5.13622	5.34468	4.43354	5.22566	5.33916	4.61784	5.4305	5.58002	4.62789	5.36671	5.13622	5.34468	0.201759	5.11022	0.798685	0.443907	0.627201	-6.6182	NonSig	1	Single-promoter
695	ENSG00000099817	POLR2E	chr19	1095382	-	FALSE	1	FB-PB.2413.1,FB-PB.2413.2,FB-PB.2413.3	4.59881	4.59881	5.23487	5.23487	Major	Major	4.02082	4.52623	5.30682	4.49218	4.64802	5.6125	5.3916	5.25847	4.89868	5.01308	4.02082	4.52623	5.30682	4.49218	4.64802	5.6125	5.3916	5.25847	4.89868	5.01308	0.636052	4.91684	2.6591	0.0248675	0.101841	-4.0684	NonSig	1	Single-promoter
696	ENSG00000099821	POLRMT	chr19	625183	-	FALSE	1	FB-PB.2408.1	3.98005	3.98005	4.14559	4.14559	Major	Major	3.55488	4.69586	3.94079	4.11976	3.58894	3.81459	4.42556	3.92276	4.25943	4.30559	3.55488	4.69586	3.94079	4.11976	3.58894	3.81459	4.42556	3.92276	4.25943	4.30559	0.165543	4.06282	0.702716	0.499025	0.672577	-6.69263	NonSig	1	Single-promoter
697	ENSG00000099917	MED15	chr22	20507611	+	FALSE	1	FB-PB.3192.1,FB-PB.3192.2	5.65014	5.65014	5.5353	5.5353	Major	Major	5.33719	5.55464	5.82354	5.91636	5.61896	5.07365	5.49871	5.88642	5.09174	6.126	5.33719	5.55464	5.82354	5.91636	5.61896	5.07365	5.49871	5.88642	5.09174	6.126	-0.114834	5.59272	-0.497127	0.630359	0.780658	-6.8226	NonSig	1	Single-promoter
698	ENSG00000099940	SNAP29	chr22	20859018	+	FALSE	1	FB-PB.3194.1	4.75651	4.75651	4.65482	4.65482	Major	Major	5.39977	5.02796	4.75603	4.20234	4.39645	4.64169	4.35129	4.87439	5.26198	4.14476	5.39977	5.02796	4.75603	4.20234	4.39645	4.64169	4.35129	4.87439	5.26198	4.14476	-0.101686	4.70566	-0.362765	0.724691	0.844515	-6.88462	NonSig	1	Single-promoter
699	ENSG00000099942	CRKL	chr22	20917411	+	FALSE	1	FB-PB.3195.1,FB-PB.3195.2	6.49327	6.49327	6.04551	6.04551	Major	Major	6.55746	7.39844	6.11257	6.22365	6.1742	5.90248	6.06139	6.37527	6.04732	5.84108	6.55746	7.39844	6.11257	6.22365	6.1742	5.90248	6.06139	6.37527	6.04732	5.84108	-0.447757	6.26939	-1.78876	0.105399	0.252199	-5.44767	NonSig	1	Single-promoter
700	ENSG00000099949	LZTR1	chr22	20981989	+	FALSE	1	FB-PB.3196.1,FB-PB.3196.2	4.20771	4.20771	4.73702	4.73702	Major	Major	3.55488	3.84972	4.93595	3.93892	4.75906	4.87378	4.62789	4.87439	4.79152	4.51753	3.55488	3.84972	4.93595	3.93892	4.75906	4.87378	4.62789	4.87439	4.79152	4.51753	0.529312	4.47236	1.95859	0.0800219	0.21445	-5.1939	NonSig	1	Single-promoter
701	ENSG00000099968	BCL2L13	chr22	17638737	+	FALSE	1	FB-PB.3190.1,FB-PB.3190.2	3.65329	3.65329	3.54067	3.54067	Major	Major	3.9389	3.40377	4.1738	3.93892	2.81107	3.43334	3.09572	3.07993	4.3377	3.75666	3.9389	3.40377	4.1738	3.93892	2.81107	3.43334	3.09572	3.07993	4.3377	3.75666	-0.112625	3.59698	-0.348564	0.734988	0.850193	-6.89008	NonSig	1	Single-promoter
702	ENSG00000099991	CABIN1	chr22	24011360	+	FALSE	1	FB-PB.3206.1,FB-PB.3206.2	3.43382	3.43382	3.23632	3.23632	Major	Major	2.6727	2.94647	4.1738	4.20234	3.17378	2.68841	1.05547	4.12123	4.25943	4.05708	2.6727	2.94647	4.1738	4.20234	3.17378	2.68841	1.05547	4.12123	4.25943	4.05708	-0.197492	3.33507	-0.308641	0.764231	0.86863	-6.90428	NonSig	1	Single-promoter
703	ENSG00000099995	SF3A1	chr22	30356894	-	FALSE	1	FB-PB.3220.1,FB-PB.3220.2	5.16217	5.16217	5.10394	5.10394	Major	Major	4.43354	5.26215	5.33916	5.96448	4.81154	4.76239	5.2759	5.2863	5.09174	5.10339	4.43354	5.26215	5.33916	5.96448	4.81154	4.76239	5.2759	5.2863	5.09174	5.10339	-0.0582282	5.13306	-0.218174	0.831891	0.915547	-6.93018	NonSig	1	Single-promoter
704	ENSG00000100003	SEC14L2	chr22	30397019	+	FALSE	1	FB-PB.3219.1	2.59782	2.59782	3.73518	3.73518	Major	Major	3.66089	2.27306	2.86414	1.01725	3.17378	4.02226	2.08243	3.51577	5.09174	3.96372	3.66089	2.27306	2.86414	1.01725	3.17378	4.02226	2.08243	3.51577	5.09174	3.96372	1.13736	3.1665	1.84396	0.096427	0.240026	-5.36635	NonSig	1	Single-promoter
705	ENSG00000100030	MAPK1	chr22	21867657	-	FALSE	1	FB-PB.3199.1,FB-PB.3199.2,FB-PB.3199.3	5.6567	5.6567	5.76056	5.76056	Major	Major	6.26983	5.39951	5.4908	5.76158	5.36178	5.64426	5.35406	6.1665	6.02384	5.61413	6.26983	5.39951	5.4908	5.76158	5.36178	5.64426	5.35406	6.1665	6.02384	5.61413	0.103858	5.70863	0.466507	0.651326	0.795193	-6.83837	NonSig	1	Single-promoter
706	ENSG00000100034	PPM1F	chr22	21952858	-	FALSE	1	FB-PB.3202.1	1.17403	1.17403	2.37226	2.37226	Major	Major	0	0	2.6744	1.60792	1.58785	2.09343	3.55876	1.69453	2.88882	1.62578	0	0	2.6744	1.60792	1.58785	2.09343	3.55876	1.69453	2.88882	1.62578	1.19823	1.77315	2.0289	0.0712999	0.197842	-5.08597	NonSig	1	Single-promoter
707	ENSG00000100036	SLC35E4	chr22	30635761	+	FALSE	1	FB-PB.3221.1,FB-PB.3221.3	4.01544	4.01544	3.33343	3.33343	Major	Major	4.24189	4.74825	4.2438	4.03217	2.81107	3.81459	3.26711	2.63669	3.8954	3.05334	4.24189	4.74825	4.2438	4.03217	2.81107	3.81459	3.26711	2.63669	3.8954	3.05334	-0.682009	3.67443	-1.8096	0.101925	0.247424	-5.41711	NonSig	1	Single-promoter
708	ENSG00000100100	PIK3IP1	chr22	31292470	-	FALSE	1	FB-PB.3225.1	5.30658	5.30658	3.87428	3.87428	Major	Major	5.13131	4.7988	5.4908	5.64831	5.46367	4.50995	4.10232	2.80004	3.99538	3.96372	5.13131	4.7988	5.4908	5.64831	5.46367	4.50995	4.10232	2.80004	3.99538	3.96372	-1.4323	4.59043	-4.63526	0.00105277	0.0133487	-0.846298	DownReg	1	Single-promoter
709	ENSG00000100106	TRIOBP	chr22	37746307	+	FALSE	1	FB-PB.3235.1,FB-PB.3235.2	4.56557	4.56557	3.97689	3.97689	Major	Major	4.02082	4.46494	4.80316	4.67679	4.86217	2.42137	4.74855	4.59173	3.8954	4.22742	4.02082	4.46494	4.80316	4.67679	4.86217	2.42137	4.74855	4.59173	3.8954	4.22742	-0.588682	4.27123	-1.41856	0.187867	0.36295	-5.95741	NonSig	1	Single-promoter
710	ENSG00000100109	TFIP11	chr22	26512476	-	FALSE	1	FB-PB.3205.1	3.40017	3.40017	3.50637	3.50637	Major	Major	3.44047	3.64391	3.18199	3.03005	3.70444	3.57192	3.55876	3.92276	3.25432	3.2241	3.44047	3.64391	3.18199	3.03005	3.70444	3.57192	3.55876	3.92276	3.25432	3.2241	0.106198	3.45327	0.565233	0.584965	0.742738	-6.78414	NonSig	1	Single-promoter
712	ENSG00000100227	POLDIP3	chr22	42614887	-	FALSE	1	FB-PB.3266.1	4.95039	4.95039	4.59114	4.59114	Major	Major	5.09395	4.94061	4.80316	5.58816	4.32605	5.11957	4.10232	4.67829	4.99844	4.05708	5.09395	4.94061	4.80316	5.58816	4.32605	5.11957	4.10232	4.67829	4.99844	4.05708	-0.359244	4.77076	-1.24172	0.244009	0.429407	-6.17421	NonSig	1	Single-promoter
713	ENSG00000100234	TIMP3	chr22	32801705	+	FALSE	1	FB-PB.3234.3,FB-PB.3234.2,FB-PB.3234.1	8.93918	8.93918	7.08766	7.08766	Major	Major	9.29719	8.39416	9.14996	8.56948	9.2851	7.17767	7.43016	6.81808	7.32281	6.68956	9.29719	8.39416	9.14996	8.56948	9.2851	7.17767	7.43016	6.81808	7.32281	6.68956	-1.85152	8.01342	-7.87595	1.78801e-05	0.00108583	3.36599	DownReg	1	Single-promoter
714	ENSG00000100239	PPP6R2	chr22	50343319	+	FALSE	1	FB-PB.3283.3,FB-PB.3283.2,FB-PB.3283.4	3.59207	3.59207	3.17523	3.17523	Major	Major	4.65494	3.84972	4.10024	3.03005	2.3254	3.10843	3.26711	2.45245	3.40734	3.6408	4.65494	3.84972	4.10024	3.03005	2.3254	3.10843	3.26711	2.45245	3.40734	3.6408	-0.416843	3.38365	-0.974736	0.353765	0.542769	-6.4605	NonSig	1	Single-promoter
715	ENSG00000100242	SUN2	chr22	38756026	-	FALSE	1	FB-PB.3241.1,FB-PB.3241.2	4.44462	4.44462	3.54431	3.54431	Major	Major	4.1719	4.46494	4.84879	4.73343	4.00406	3.43334	4.42556	2.45245	3.8954	3.51481	4.1719	4.46494	4.84879	4.73343	4.00406	3.43334	4.42556	2.45245	3.8954	3.51481	-0.900312	3.99447	-2.62687	0.0262528	0.104851	-4.1219	NonSig	1	Single-promoter
716	ENSG00000100243	CYB5R3	chr22	42649370	-	FALSE	1	FB-PB.3267.1	6.64784	6.64784	6.27242	6.27242	Major	Major	6.50149	6.24323	7.1115	6.72047	6.6625	6.54816	5.93994	6.36225	6.56931	5.94244	6.50149	6.24323	7.1115	6.72047	6.6625	6.54816	5.93994	6.36225	6.56931	5.94244	-0.375419	6.46013	-1.85448	0.0947992	0.23718	-5.35071	NonSig	1	Single-promoter
717	ENSG00000100266	PACSIN2	chr22	43015149	-	FALSE	1	FB-PB.3269.2,FB-PB.3269.3	5.88175	5.88175	5.59969	5.59969	Major	Major	5.36882	6.00568	5.93353	5.98794	6.1128	6.12142	5.0597	5.64984	5.58442	5.58307	5.36882	6.00568	5.93353	5.98794	6.1128	6.12142	5.0597	5.64984	5.58442	5.58307	-0.282063	5.74072	-1.31772	0.218371	0.400927	-6.08346	NonSig	1	Single-promoter
718	ENSG00000100280	AP1B1	chr22	29388560	-	FALSE	1	FB-PB.3213.1	4.56733	4.56733	5.42064	5.42064	Major	Major	4.30864	4.26371	4.65688	5.35537	4.25204	5.47794	5.42819	5.07917	5.73663	5.38124	4.30864	4.26371	4.65688	5.35537	4.25204	5.47794	5.42819	5.07917	5.73663	5.38124	0.853306	4.99398	3.67032	0.00467111	0.033451	-2.38212	NonSig	1	Single-promoter
719	ENSG00000100296	THOC5	chr22	29553736	-	FALSE	1	FB-PB.3215.1	3.09026	3.09026	3.49918	3.49918	Major	Major	3.66089	2.53402	3.31801	2.34943	3.58894	4.11587	3.42029	3.31424	2.88882	3.75666	3.66089	2.53402	3.31801	2.34943	3.58894	4.11587	3.42029	3.31424	2.88882	3.75666	0.408919	3.29472	1.25687	0.238712	0.424352	-6.15643	NonSig	1	Single-promoter
720	ENSG00000100304	TTLL12	chr22	43187114	-	FALSE	1	FB-PB.3274.1	1.27287	1.27287	2.38225	2.38225	Major	Major	2.6727	0	2.6744	1.01725	0	1.6683	2.08243	2.63669	2.66422	2.85963	2.6727	0	2.6744	1.01725	0	1.6683	2.08243	2.63669	2.66422	2.85963	1.10938	1.82756	1.87116	0.0922726	0.232791	-5.32586	NonSig	1	Single-promoter
721	ENSG00000100324	TAB1	chr22	39399754	+	FALSE	1	FB-PB.3244.1,FB-PB.3244.3	1.00384	1.00384	1.46932	1.46932	Major	Major	0.922984	0	1.48263	2.6136	0	0	1.65846	1.9936	1.64871	2.04584	0.922984	0	1.48263	2.6136	0	0	1.65846	1.9936	1.64871	2.04584	0.465482	1.23658	0.810903	0.43719	0.620844	-6.60813	NonSig	1	Single-promoter
722	ENSG00000100325	ASCC2	chr22	29838274	-	FALSE	1	FB-PB.3217.1,FB-PB.3217.2,FB-PB.3217.3	3.76541	3.76541	4.69689	4.69689	Major	Major	4.70536	3.40377	4.10024	2.6136	4.00406	4.76239	4.56355	4.67829	4.61418	4.86603	4.70536	3.40377	4.10024	2.6136	4.00406	4.76239	4.56355	4.67829	4.61418	4.86603	0.931482	4.23115	2.74388	0.0215641	0.0929478	-3.92728	NonSig	1	Single-promoter
723	ENSG00000100330	MTMR3	chr22	30019923	+	FALSE	1	FB-PB.3218.1	4.52764	4.52764	3.6357	3.6357	Major	Major	5.36882	4.84763	4.75603	4.20234	3.46337	3.81459	3.80124	4.29567	3.40734	2.85963	5.36882	4.84763	4.75603	4.20234	3.46337	3.81459	3.80124	4.29567	3.40734	2.85963	-0.891941	4.08167	-2.35167	0.0416834	0.139229	-4.57373	NonSig	1	Single-promoter
724	ENSG00000100335	MIEF1	chr22	39502268	+	FALSE	1	FB-PB.3245.1,FB-PB.3245.2,FB-PB.3245.3	2.91356	2.91356	4.19651	4.19651	Major	Major	4.30864	2.27306	2.86414	4.11976	1.00217	4.50995	4.19017	3.85003	4.67574	3.75666	4.30864	2.27306	2.86414	4.11976	1.00217	4.50995	4.19017	3.85003	4.67574	3.75666	1.28296	3.55503	2.17596	0.055897	0.170027	-4.85563	NonSig	1	Single-promoter
725	ENSG00000100344	PNPLA3	chr22	43923761	+	FALSE	1	FB-PB.3271.2,FB-PB.3271.3	0.308871	0.308871	0.422206	0.422206	Major	Major	0	1.54436	0	0	0	1.06295	0	0	1.04808	0	0	1.54436	0	0	0	1.06295	0	0	1.04808	0	0.113334	0.365539	0.299031	0.771331	0.873044	-6.90745	NonSig	1	Single-promoter
726	ENSG00000100345	MYH9	chr22	36294109	-	TRUE	3	FB-PB.3233.2	7.03772	21.7081	7.82319	24.2784	NA	NA	7.35034	6.9615	7.01471	6.67781	7.18421	8.09434	7.56773	7.82597	7.56169	8.0662	22.4772	22.0262	21.8424	19.8175	22.3773	24.8547	24.0126	24.3013	23.9236	24.2998	0.785469	7.43045	4.58048	0.00114174	0.0140671	-0.930317	NonSig	3	Multiple-promoter
727	ENSG00000100345	MYH9	chr22	36295009	-	TRUE	2	FB-PB.3233.3	7.43061	21.7081	8.43054	24.2784	NA	NA	7.54978	7.73335	7.37592	6.74822	7.74578	8.66599	8.37064	8.39769	8.31346	8.40492	22.4772	22.0262	21.8424	19.8175	22.3773	24.8547	24.0126	24.3013	23.9236	24.2998	0.99993	7.93058	5.06806	0.000563124	0.00911702	-0.197599	NonSig	3	Multiple-promoter
728	ENSG00000100345	MYH9	chr22	36387966	-	FALSE	1	FB-PB.3233.1,FB-PB.3233.4	7.23979	21.7081	8.02467	24.2784	Minor	Minor	7.57712	7.33135	7.45182	6.39143	7.44725	8.09434	8.07426	8.07763	8.04843	7.82871	22.4772	22.0262	21.8424	19.8175	22.3773	24.8547	24.0126	24.3013	23.9236	24.2998	0.784881	7.63223	3.56024	0.00557914	0.0376232	-2.56374	NonSig	3	Multiple-promoter
729	ENSG00000100348	TXN2	chr22	36481629	-	FALSE	1	FB-PB.3236.1	5.95743	5.95743	5.99664	5.99664	Major	Major	6.54367	5.66776	6.11257	5.81504	5.64811	6.12142	5.98975	6.13624	5.97569	5.7601	6.54367	5.66776	6.11257	5.81504	5.64811	6.12142	5.98975	6.13624	5.97569	5.7601	0.0392133	5.97704	0.209048	0.838808	0.920574	-6.9323	NonSig	1	Single-promoter
730	ENSG00000100354	TNRC6B	chr22	40044771	+	FALSE	1	FB-PB.3247.1	4.66925	9.45886	3.52085	8.72876	Minor	Minor	5.30485	4.7988	4.97764	3.93892	4.32605	3.57192	3.42029	3.20184	3.8954	3.51481	8.62105	9.90911	10.0352	9.39869	9.33025	8.736	8.77435	8.34329	9.30964	8.48052	-1.1484	4.09505	-4.4308	0.00142818	0.0160114	-1.16197	DownReg	2	Multiple-promoter
731	ENSG00000100354	TNRC6B	chr22	40177925	+	FALSE	2	FB-PB.3247.2,FB-PB.3247.3	4.78961	9.45886	5.20791	8.72876	Major	Major	3.31619	5.11032	5.05755	5.45977	5.0042	5.16408	5.35406	5.14145	5.41424	4.96571	8.62105	9.90911	10.0352	9.39869	9.33025	8.736	8.77435	8.34329	9.30964	8.48052	0.4183	4.99876	1.15091	0.277805	0.46855	-6.27749	NonSig	2	Multiple-promoter
733	ENSG00000100359	SGSM3	chr22	40370616	+	FALSE	1	FB-PB.3250.1	2.3727	2.3727	3.1075	3.1075	Major	Major	2.45422	2.27306	2.19823	2.34943	2.58858	4.28662	2.90118	3.41852	2.07153	2.85963	2.45422	2.27306	2.19823	2.34943	2.58858	4.28662	2.90118	3.41852	2.07153	2.85963	0.734793	2.7401	2.09313	0.0641287	0.184883	-4.98607	NonSig	1	Single-promoter
734	ENSG00000100376	FAM118A	chr22	45309930	+	FALSE	1	FB-PB.3273.1	3.12982	3.12982	3.17987	3.17987	Major	Major	2.19665	2.94647	3.66274	4.03217	2.81107	3.10843	3.90873	2.94676	2.07153	3.8639	2.19665	2.94647	3.66274	4.03217	2.81107	3.10843	3.90873	2.94676	2.07153	3.8639	0.0500485	3.15485	0.114303	0.911368	0.964543	-6.94903	NonSig	1	Single-promoter
735	ENSG00000100380	ST13	chr22	40856646	-	FALSE	1	FB-PB.3255.1,FB-PB.3255.2,FB-PB.3255.3	8.37459	8.37459	8.2592	8.2592	Major	Major	8.13218	8.5572	8.26619	8.53803	8.37936	8.27768	8.45286	8.22511	8.18173	8.15862	8.13218	8.5572	8.26619	8.53803	8.37936	8.27768	8.45286	8.22511	8.18173	8.15862	-0.115392	8.31689	-0.931915	0.37437	0.562131	-6.50128	NonSig	1	Single-promoter
736	ENSG00000100393	EP300	chr22	41092593	+	FALSE	1	FB-PB.3256.1	6.99606	6.99606	6.27873	6.27873	Major	Major	7.27722	7.22446	6.7875	6.84135	6.84979	6.51418	6.35544	6.51119	6.07043	5.94244	7.27722	7.22446	6.7875	6.84135	6.84979	6.51418	6.35544	6.51119	6.07043	5.94244	-0.717327	6.6374	-4.27368	0.00181266	0.0183466	-1.40837	NonSig	1	Single-promoter
737	ENSG00000100395	L3MBTL2	chr22	41205310	+	FALSE	1	FB-PB.3258.1	3.2684	3.2684	3.96447	3.96447	Major	Major	1.88288	3.11553	4.02271	3.61643	3.70444	3.81459	3.80124	3.41852	4.3377	4.45028	1.88288	3.11553	4.02271	3.61643	3.70444	3.81459	3.80124	3.41852	4.3377	4.45028	0.696071	3.61643	1.76089	0.110214	0.258574	-5.48826	NonSig	1	Single-promoter
738	ENSG00000100401	RANGAP1	chr22	41286197	-	FALSE	1	FB-PB.3259.1,FB-PB.3259.2	4.78464	4.78464	5.73126	5.73126	Major	Major	5.36882	5.02796	4.65688	4.28044	4.58912	5.40564	5.83483	6.07374	6.28317	5.05894	5.36882	5.02796	4.65688	4.28044	4.58912	5.40564	5.83483	6.07374	6.28317	5.05894	0.946621	5.25795	3.37137	0.00759062	0.0457539	-2.87743	NonSig	1	Single-promoter
739	ENSG00000100413	POLR3H	chr22	41544470	-	FALSE	1	FB-PB.3261.1,FB-PB.3261.2	5.2115	5.2115	5.19006	5.19006	Major	Major	5.70249	4.89487	5.33916	5.16261	4.95839	5.64426	5.0597	5.20114	4.89868	5.14651	5.70249	4.89487	5.33916	5.16261	4.95839	5.64426	5.0597	5.20114	4.89868	5.14651	-0.0214429	5.20078	-0.109512	0.915067	0.967025	-6.94961	NonSig	1	Single-promoter
740	ENSG00000100422	CERK	chr22	46738244	-	FALSE	1	FB-PB.3279.1	3.13224	3.13224	3.29432	3.29432	Major	Major	3.55488	1.54436	4.55042	3.20045	2.81107	3.10843	3.68509	2.63669	2.3981	4.64328	3.55488	1.54436	4.55042	3.20045	2.81107	3.10843	3.68509	2.63669	2.3981	4.64328	0.162081	3.21328	0.27568	0.788674	0.884411	-6.91473	NonSig	1	Single-promoter
741	ENSG00000100504	PYGL	chr14	50944503	-	FALSE	1	FB-PB.1587.1	3.92235	3.92235	4.41949	4.41949	Major	Major	3.66089	4.40093	4.1738	4.20234	3.17378	4.50995	3.90873	4.94593	4.67574	4.05708	3.66089	4.40093	4.1738	4.20234	3.17378	4.50995	3.90873	4.94593	4.67574	4.05708	0.497141	4.17092	1.75079	0.11201	0.261534	-5.5029	NonSig	1	Single-promoter
742	ENSG00000100522	GNPNAT1	chr14	52791510	-	FALSE	1	FB-PB.1592.3	2.42385	2.42385	3.96925	3.96925	Major	Major	2.8624	1.95424	0	3.83923	3.46337	4.02226	4.10232	3.992	4.08887	3.6408	2.8624	1.95424	0	3.83923	3.46337	4.02226	4.10232	3.992	4.08887	3.6408	1.5454	3.19655	2.42353	0.0369503	0.128686	-4.45676	NonSig	1	Single-promoter
744	ENSG00000100523	DDHD1	chr14	53153299	-	FALSE	1	FB-PB.1595.1	5.65717	5.65717	4.68143	4.68143	Major	Major	5.48882	5.984	5.60158	5.4258	5.78562	5.16408	4.68948	5.01409	4.89868	3.6408	5.48882	5.984	5.60158	5.4258	5.78562	5.16408	4.68948	5.01409	4.89868	3.6408	-0.97574	5.1693	-3.49167	0.00623619	0.0403191	-2.67735	NonSig	1	Single-promoter
745	ENSG00000100528	CNIH1	chr14	54441366	-	FALSE	1	FB-PB.1597.1	8.06798	8.06798	8.24469	8.24469	Major	Major	8.32993	8.17248	8.02908	7.87335	7.93505	8.30277	8.5598	8.24652	8.57008	7.54429	8.32993	8.17248	8.02908	7.87335	7.93505	8.30277	8.5598	8.24652	8.57008	7.54429	0.176711	8.15634	0.856234	0.412864	0.598004	-6.56958	NonSig	1	Single-promoter
746	ENSG00000100568	VTI1B	chr14	67674630	-	FALSE	1	FB-PB.1631.1,FB-PB.1631.2,FB-PB.1631.3	4.79296	4.79296	5.14315	5.14315	Major	Major	4.1719	4.89487	4.93595	4.78793	5.17414	5.02622	5.23517	5.17161	5.17937	5.10339	4.1719	4.89487	4.93595	4.78793	5.17414	5.02622	5.23517	5.17161	5.17937	5.10339	0.350194	4.96805	1.95179	0.0809162	0.215813	-5.20425	NonSig	1	Single-promoter
747	ENSG00000100599	RIN3	chr14	92513630	+	FALSE	1	FB-PB.1679.1,FB-PB.1679.2	2.78256	2.78256	3.04762	3.04762	Major	Major	0.922984	3.64391	3.18199	3.35283	2.81107	3.81459	3.09572	1.31681	3.25432	3.75666	0.922984	3.64391	3.18199	3.35283	2.81107	3.81459	3.09572	1.31681	3.25432	3.75666	0.265063	2.91509	0.431497	0.675698	0.810795	-6.85523	NonSig	1	Single-promoter
748	ENSG00000100614	PPM1A	chr14	60249221	+	FALSE	1	FB-PB.1617.1,FB-PB.1617.2	5.29241	5.29241	4.75242	4.75242	Major	Major	5.16773	5.55464	5.54725	5.28133	4.91108	4.7033	5.2759	4.54641	5.09174	4.14476	5.16773	5.55464	5.54725	5.28133	4.91108	4.7033	5.2759	4.54641	5.09174	4.14476	-0.539985	5.02242	-2.33245	0.043047	0.142256	-4.60485	NonSig	1	Single-promoter
749	ENSG00000100644	HIF1A	chr14	61695518	+	FALSE	1	FB-PB.1624.1,FB-PB.1624.2,FB-PB.1624.3	6.67606	14.8204	8.3641	18.539	Minor	Minor	6.45804	7.26996	6.03573	6.49334	7.12325	8.1058	8.27845	8.64074	8.5206	8.27492	14.4347	15.8526	13.6149	14.737	15.463	18.2275	18.1978	19.274	18.3481	18.6474	1.68804	7.52008	6.9501	5.0106e-05	0.00195839	2.30824	UpReg	2	Multiple-promoter
750	ENSG00000100644	HIF1A	chr14	61720538	+	TRUE	2	FB-PB.1624.5	8.14436	14.8204	10.1749	18.539	NA	NA	7.97664	8.58267	7.57913	8.24363	8.33971	10.1217	9.91935	10.6333	9.82751	10.3725	14.4347	15.8526	13.6149	14.737	15.463	18.2275	18.1978	19.274	18.3481	18.6474	2.03052	9.15962	9.03007	5.58948e-06	0.000663624	4.5463	UpReg	2	Multiple-promoter
751	ENSG00000100647	SUSD6	chr14	69611596	+	FALSE	1	FB-PB.1643.1	4.88894	4.88894	5.0685	5.0685	Major	Major	5.16773	4.7988	4.02271	5.28133	5.17414	5.47794	5.53271	4.98041	5.04584	4.30559	5.16773	4.7988	4.02271	5.28133	5.17414	5.47794	5.53271	4.98041	5.04584	4.30559	0.179559	4.97872	0.587819	0.570309	0.732569	-6.77037	NonSig	1	Single-promoter
752	ENSG00000100664	EIF5	chr14	103334192	+	TRUE	1	FB-PB.1704.1,FB-PB.1704.2,FB-PB.1704.3,FB-PB.1704.4,FB-PB.1704.5,FB-PB.1704.6	7.9421	7.9421	7.79872	7.79872	NA	NA	7.8023	7.90469	7.937	8.04539	8.02113	7.98074	7.72307	7.97449	7.46037	7.85495	7.8023	7.90469	7.937	8.04539	8.02113	7.98074	7.72307	7.97449	7.46037	7.85495	-0.143378	7.87041	-1.09996	0.29834	0.489909	-6.33286	NonSig	1	Single-promoter
753	ENSG00000100697	DICER1	chr14	95157572	-	FALSE	1	FB-PB.1683.1	3.52528	3.52528	2.80491	2.80491	Major	Major	3.66089	4.0298	3.4423	3.03005	3.46337	3.10843	3.42029	1.31681	2.66422	3.51481	3.66089	4.0298	3.4423	3.03005	3.46337	3.10843	3.42029	1.31681	2.66422	3.51481	-0.720369	3.1651	-1.77712	0.107387	0.255147	-5.46467	NonSig	1	Single-promoter
754	ENSG00000100714	MTHFD1	chr14	64388353	+	FALSE	1	FB-PB.1625.1	4.10596	4.10596	5.32564	5.32564	Major	Major	3.03003	4.33395	4.37437	4.20234	4.58912	4.7033	5.59841	5.60634	5.04584	5.6743	3.03003	4.33395	4.37437	4.20234	4.58912	4.7033	5.59841	5.60634	5.04584	5.6743	1.21968	4.7158	3.80911	0.0037415	0.0288637	-2.15466	UpReg	1	Single-promoter
755	ENSG00000100722	ZC3H14	chr14	88563012	+	FALSE	1	FB-PB.1673.1,FB-PB.1673.2,FB-PB.1673.3,FB-PB.1673.4,FB-PB.1673.6,FB-PB.1673.5	3.55933	3.55933	3.68891	3.68891	Major	Major	2.45422	4.26371	4.1738	3.20045	3.70444	3.81459	3.80124	3.41852	3.8954	3.51481	2.45422	4.26371	4.1738	3.20045	3.70444	3.81459	3.80124	3.41852	3.8954	3.51481	0.129589	3.62412	0.39249	0.703324	0.830007	-6.87251	NonSig	1	Single-promoter
756	ENSG00000100726	TELO2	chr16	1493558	+	FALSE	1	FB-PB.1889.1	1.2074	1.2074	1.73905	1.73905	Major	Major	0	2.94647	1.48263	1.60792	0	2.09343	1.05547	2.45245	1.04808	2.04584	0	2.94647	1.48263	1.60792	0	2.09343	1.05547	2.45245	1.04808	2.04584	0.531651	1.47323	0.916147	0.382171	0.570201	-6.51591	NonSig	1	Single-promoter
757	ENSG00000100811	YY1	chr14	100239140	+	FALSE	1	FB-PB.1691.1	6.6377	6.6377	6.50171	6.50171	Major	Major	5.84424	7.15824	6.16763	7.19393	6.82448	6.29156	6.69276	6.73973	6.02384	6.76067	5.84424	7.15824	6.16763	7.19393	6.82448	6.29156	6.69276	6.73973	6.02384	6.76067	-0.135992	6.56971	-0.460608	0.655403	0.798085	-6.8413	NonSig	1	Single-promoter
758	ENSG00000100813	ACIN1	chr14	23095148	-	FALSE	1	FB-PB.1540.1,FB-PB.1540.2,FB-PB.1540.3	3.86137	3.86137	4.14562	4.14562	Major	Major	4.43354	4.11206	3.55673	3.20045	4.00406	4.64169	4.19017	3.77344	3.8954	4.22742	4.43354	4.11206	3.55673	3.20045	4.00406	4.64169	4.19017	3.77344	3.8954	4.22742	0.284255	4.0035	1.10565	0.295987	0.487874	-6.32676	NonSig	1	Single-promoter
759	ENSG00000100836	PABPN1	chr14	23321974	+	TRUE	1	FB-PB.1543.2	7.25913	7.25913	7.41884	7.41884	NA	NA	7.11883	7.41474	7.18451	7.57327	7.0043	7.4976	7.1742	7.60621	7.17074	7.64546	7.11883	7.41474	7.18451	7.57327	7.0043	7.4976	7.1742	7.60621	7.17074	7.64546	0.159711	7.33899	1.00097	0.34156	0.531888	-6.43478	NonSig	1	Single-promoter
760	ENSG00000100852	ARHGAP5	chr14	32076933	+	FALSE	1	FB-PB.1565.1	1.31553	6.08425	1.24216	5.59671	Minor	Minor	3.03003	1.54436	0	0	2.00325	2.09343	0	0	2.07153	2.04584	6.96893	6.84209	4.75603	4.67679	7.17739	6.38005	4.19017	4.18175	6.48347	6.74812	-0.0733685	1.27884	-0.102357	0.920594	0.971019	-6.95044	NonSig	2	Multiple-promoter
761	ENSG00000100852	ARHGAP5	chr14	32077296	+	FALSE	2	FB-PB.1565.2,FB-PB.1565.3,FB-PB.1565.4	4.76872	6.08425	4.35455	5.59671	Major	Major	3.9389	5.29773	4.75603	4.67679	5.17414	4.28662	4.19017	4.18175	4.41194	4.70228	6.96893	6.84209	4.75603	4.67679	7.17739	6.38005	4.19017	4.18175	6.48347	6.74812	-0.414166	4.56164	-1.64741	0.131974	0.286151	-5.65013	NonSig	2	Multiple-promoter
762	ENSG00000100902	PSMA6	chr14	35292382	+	FALSE	1	FB-PB.1569.1	6.20807	6.20807	6.81616	6.81616	Major	Major	5.36882	6.4629	6.72768	5.89169	6.58925	6.64555	6.53394	7.31344	6.63278	6.95512	5.36882	6.4629	6.72768	5.89169	6.58925	6.64555	6.53394	7.31344	6.63278	6.95512	0.608096	6.51212	2.16932	0.0565168	0.170333	-4.86614	NonSig	1	Single-promoter
763	ENSG00000100906	NFKBIA	chr14	35404749	-	FALSE	1	FB-PB.1567.1	11.5831	11.5831	10.8612	10.8612	Major	Major	11.5911	11.4754	10.8045	12.221	11.8233	10.7016	10.959	10.8963	10.9203	10.829	11.5911	11.4754	10.8045	12.221	11.8233	10.7016	10.959	10.8963	10.9203	10.829	-0.721837	11.2221	-3.08748	0.0121344	0.0632215	-3.3522	NonSig	1	Single-promoter
764	ENSG00000100934	SEC23A	chr14	39103233	-	FALSE	1	FB-PB.1568.1,FB-PB.1568.2,FB-PB.1568.3,FB-PB.1568.4	5.19051	5.19051	6.23575	6.23575	Major	Major	5.54528	4.40093	5.65394	4.73343	5.61896	5.87597	6.06139	6.81808	5.79328	6.63003	5.54528	4.40093	5.65394	4.73343	5.61896	5.87597	6.06139	6.81808	5.79328	6.63003	1.04524	5.71313	3.30376	0.00848244	0.0491444	-2.99023	UpReg	1	Single-promoter
765	ENSG00000100941	PNN	chr14	39175203	+	FALSE	1	FB-PB.1571.1	7.19566	7.19566	7.1612	7.1612	Major	Major	7.54287	7.24283	7.04444	7.0564	7.09177	7.32214	7.09675	7.02219	7.00073	7.36421	7.54287	7.24283	7.04444	7.0564	7.09177	7.32214	7.09675	7.02219	7.00073	7.36421	-0.034457	7.17843	-0.244896	0.811725	0.901968	-6.92344	NonSig	1	Single-promoter
766	ENSG00000100968	NFATC4	chr14	24368180	+	FALSE	1	FB-PB.1549.1,FB-PB.1549.2	5.87553	5.87553	4.80841	4.80841	Major	Major	6.21868	5.91693	5.97528	5.94062	5.32616	4.43928	5.2759	5.23009	5.34012	3.75666	6.21868	5.91693	5.97528	5.94062	5.32616	4.43928	5.2759	5.23009	5.34012	3.75666	-1.06712	5.34197	-3.27152	0.00894529	0.0506989	-3.0441	NonSig	1	Single-promoter
767	ENSG00000100982	PCIF1	chr20	45934694	+	FALSE	1	FB-PB.3101.1	4.87901	4.87901	4.52228	4.52228	Major	Major	4.1719	4.52623	5.05755	5.24283	5.39655	4.36497	4.4962	4.40125	4.89868	4.45028	4.1719	4.52623	5.05755	5.24283	5.39655	4.36497	4.4962	4.40125	4.89868	4.45028	-0.356733	4.70064	-1.46005	0.176417	0.350509	-5.90379	NonSig	1	Single-promoter
768	ENSG00000100991	TRPC4AP	chr20	35092806	-	FALSE	1	FB-PB.3069.1,FB-PB.3069.2	4.79155	4.79155	4.9871	4.9871	Major	Major	5.05559	4.69586	3.85393	4.73343	5.61896	4.87378	4.68948	5.51521	4.54987	5.30716	5.05559	4.69586	3.85393	4.73343	5.61896	4.87378	4.68948	5.51521	4.54987	5.30716	0.195544	4.88933	0.603914	0.55999	0.725063	-6.76025	NonSig	1	Single-promoter
769	ENSG00000100994	PYGB	chr20	25248072	+	FALSE	1	FB-PB.3049.1,FB-PB.3049.2,FB-PB.3049.3,FB-PB.3049.4,FB-PB.3049.5	5.12482	5.12482	5.33172	5.33172	Major	Major	5.7271	6.16831	4.97764	4.425	4.32605	5.6125	5.69167	4.94593	5.76523	4.64328	5.7271	6.16831	4.97764	4.425	4.32605	5.6125	5.69167	4.94593	5.76523	4.64328	0.206904	5.22827	0.51827	0.616079	0.768481	-6.81116	NonSig	1	Single-promoter
771	ENSG00000101003	GINS1	chr20	25407686	+	FALSE	1	FB-PB.3052.1	1.55628	1.55628	3.77231	3.77231	Major	Major	0	1.54436	1.88435	2.34943	2.00325	3.43334	3.90873	4.40125	3.25432	3.8639	0	1.54436	1.88435	2.34943	2.00325	3.43334	3.90873	4.40125	3.25432	3.8639	2.21603	2.66429	5.19154	0.000473403	0.0081709	-0.0175159	UpReg	1	Single-promoter
772	ENSG00000101040	ZMYND8	chr20	47319053	-	FALSE	2	FB-PB.3105.1	2.28901	5.83004	3.09014	7.01505	Minor	Minor	2.8624	1.54436	2.19823	2.8368	2.00325	4.02226	3.26711	2.63669	2.88882	2.63581	5.31662	5.29484	5.64053	6.56892	6.3293	7.83686	7.6184	6.05521	6.78422	6.78057	0.801131	2.68957	2.33535	0.0428389	0.141867	-4.60017	NonSig	2	Multiple-promoter
773	ENSG00000101040	ZMYND8	chr20	47356746	-	FALSE	1	FB-PB.3105.4	3.54103	5.83004	3.92491	7.01505	Major	Major	2.45422	3.75048	3.4423	3.73212	4.32605	3.81459	4.35129	3.41852	3.8954	4.14476	5.31662	5.29484	5.64053	6.56892	6.3293	7.83686	7.6184	6.05521	6.78422	6.78057	0.383879	3.73297	1.16993	0.270433	0.460877	-6.25633	NonSig	2	Multiple-promoter
774	ENSG00000101079	NDRG3	chr20	36746102	-	FALSE	1	FB-PB.3076.1	4.32382	4.32382	3.90745	3.90745	Major	Major	3.75963	4.11206	4.55042	4.73343	4.46357	4.50995	3.55876	3.51577	4.08887	3.8639	3.75963	4.11206	4.55042	4.73343	4.46357	4.50995	3.55876	3.51577	4.08887	3.8639	-0.416373	4.11563	-1.68581	0.124209	0.276425	-5.59599	NonSig	1	Single-promoter
775	ENSG00000101152	DNAJC5	chr20	63895138	+	FALSE	1	FB-PB.3128.1,FB-PB.3128.2	1.03204	1.03204	2.53928	2.53928	Major	Major	1.48133	2.75493	0.923938	0	0	2.42137	2.67627	3.31424	1.64871	2.63581	1.48133	2.75493	0.923938	0	0	2.42137	2.67627	3.31424	1.64871	2.63581	1.50724	1.78566	2.79621	0.0197499	0.0880057	-3.83996	NonSig	1	Single-promoter
776	ENSG00000101161	PRPF6	chr20	63981133	+	FALSE	1	FB-PB.3129.1	5.51093	5.51093	5.03611	5.03611	Major	Major	6.01387	5.36638	5.67943	5.24283	5.25215	5.32953	4.91249	4.94593	4.84609	5.14651	6.01387	5.36638	5.67943	5.24283	5.25215	5.32953	4.91249	4.94593	4.84609	5.14651	-0.474818	5.27352	-2.62734	0.0262319	0.104851	-4.12111	NonSig	1	Single-promoter
777	ENSG00000101182	PSMA7	chr20	62143389	-	FALSE	1	FB-PB.3124.1	7.2845	7.2845	7.92317	7.92317	Major	Major	6.99255	7.24283	7.54488	7.26289	7.37935	7.9301	7.67058	8.04948	7.7452	8.22047	6.99255	7.24283	7.54488	7.26289	7.37935	7.9301	7.67058	8.04948	7.7452	8.22047	0.638667	7.60383	4.22846	0.00194264	0.0190759	-1.47987	NonSig	1	Single-promoter
778	ENSG00000101191	DIDO1	chr20	62937914	-	FALSE	1	FB-PB.3130.1	4.05354	4.05354	4.29339	4.29339	Major	Major	4.84684	3.40377	4.1738	3.83923	4.00406	4.36497	3.80124	4.54641	3.99538	4.75895	4.84684	3.40377	4.1738	3.83923	4.00406	4.36497	3.80124	4.54641	3.99538	4.75895	0.239847	4.17347	0.847167	0.417654	0.602491	-6.57744	NonSig	1	Single-promoter
779	ENSG00000101194	SLC17A9	chr20	62952702	+	FALSE	1	FB-PB.3126.1,FB-PB.3126.2,FB-PB.3126.3	1.94661	2.1314	3.50699	5.42572	Major	Major	1.88288	0.969653	2.45587	2.8368	1.58785	4.11587	2.67627	3.31424	3.67191	3.75666	1.88288	0.969653	3.37981	2.8368	1.58785	4.11587	5.35253	6.11428	5.74344	5.8025	1.56038	2.7268	4.06894	0.00248583	0.0225974	-1.73417	UpReg	2	Multiple-promoter
780	ENSG00000101194	SLC17A9	chr20	62953037	+	FALSE	2	FB-PB.3126.4	0.184788	2.1314	1.91873	5.42572	Inactive	Minor	0	0	0.923938	0	0	0	2.67627	2.80004	2.07153	2.04584	1.88288	0.969653	3.37981	2.8368	1.58785	4.11587	5.35253	6.11428	5.74344	5.8025	1.73395	1.05176	3.47558	0.00640175	0.0410508	-2.70406	UpReg	2	Multiple-promoter
781	ENSG00000101199	ARFGAP1	chr20	63272819	+	FALSE	1	FB-PB.3127.1	4.78002	4.78002	5.75485	5.75485	Major	Major	4.24189	4.7988	4.65688	5.39102	4.81154	6.38852	5.91437	5.01409	5.61617	5.84108	4.24189	4.7988	4.65688	5.39102	4.81154	6.38852	5.91437	5.01409	5.61617	5.84108	0.974823	5.26744	3.48866	0.00626689	0.0404509	-2.68236	NonSig	1	Single-promoter
782	ENSG00000101224	CDC25B	chr20	3795781	+	FALSE	1	FB-PB.3029.1,FB-PB.3029.2	4.05255	4.05255	5.04996	5.62939	Major	Major	3.31619	4.52623	4.43547	4.28044	3.70444	5.44224	4.62789	5.07917	5.51874	4.58177	3.31619	4.52623	4.43547	4.28044	3.70444	7.53567	4.62789	5.88288	5.51874	4.58177	0.997409	4.55126	3.41154	0.00710732	0.0438383	-2.81053	NonSig	2	Multiple-promoter
783	ENSG00000101224	CDC25B	chr20	3796825	+	FALSE	2	FB-PB.3029.3	0	4.05255	0.579426	5.62939	Inactive	Minor	0	0	0	0	0	2.09343	0	0.803701	0	0	3.31619	4.52623	4.43547	4.28044	3.70444	7.53567	4.62789	5.88288	5.51874	4.58177	0.579426	0.289713	1.50597	0.164455	0.333749	-5.84332	NonSig	2	Multiple-promoter
784	ENSG00000101236	RNF24	chr20	4015572	-	FALSE	1	FB-PB.3032.2,FB-PB.3032.3,FB-PB.3032.1	4.1789	4.1789	4.44858	4.44858	Major	Major	3.31619	5.11032	4.10024	4.55638	3.81138	3.69835	4.27298	5.01409	4.61418	4.64328	3.31619	5.11032	4.10024	4.55638	3.81138	3.69835	4.27298	5.01409	4.61418	4.64328	0.269675	4.31374	0.753477	0.469356	0.649408	-6.65432	NonSig	1	Single-promoter
785	ENSG00000101266	CSNK2A1	chr20	543811	-	FALSE	1	FB-PB.3016.1,FB-PB.3016.2	4.70072	4.70072	5.39108	5.39108	Major	Major	3.9389	3.94257	5.37079	4.49218	5.75914	5.82144	5.3916	5.3136	4.61418	5.81459	3.9389	3.94257	5.37079	4.49218	5.75914	5.82144	5.3916	5.3136	4.61418	5.81459	0.690365	5.0459	1.7022	0.121024	0.27314	-5.57269	NonSig	1	Single-promoter
786	ENSG00000101294	HM13	chr20	31514449	+	FALSE	1	FB-PB.3056.1	6.42606	6.42606	6.83296	6.83296	Major	Major	6.66328	6.12934	6.22067	6.42621	6.69079	6.82258	6.96597	6.93697	6.67861	6.76067	6.66328	6.12934	6.22067	6.42621	6.69079	6.82258	6.96597	6.93697	6.67861	6.76067	0.406901	6.62951	2.82661	0.0187673	0.0854008	-3.78916	NonSig	1	Single-promoter
787	ENSG00000101310	SEC23B	chr20	18507564	+	FALSE	1	FB-PB.3043.1	3.32221	3.32221	3.96384	3.96384	Major	Major	4.49216	2.27306	3.18199	3.20045	3.46337	3.10843	4.35129	4.12123	3.78798	4.45028	4.49216	2.27306	3.18199	3.20045	3.46337	3.10843	4.35129	4.12123	3.78798	4.45028	0.641635	3.64302	1.59099	0.144174	0.304022	-5.7284	NonSig	1	Single-promoter
788	ENSG00000101337	TM9SF4	chr20	32109722	+	FALSE	1	FB-PB.3060.1,FB-PB.3060.2	4.27782	4.27782	4.56125	4.56125	Major	Major	4.37244	3.52883	3.66274	4.73343	5.09167	5.24918	4.56355	4.23984	3.78798	4.96571	4.37244	3.52883	3.66274	4.73343	5.09167	5.24918	4.56355	4.23984	3.78798	4.96571	0.283426	4.41954	0.757701	0.466938	0.647369	-6.65102	NonSig	1	Single-promoter
789	ENSG00000101346	POFUT1	chr20	32207872	+	FALSE	1	FB-PB.3061.1	4.16403	4.16403	4.5221	4.5221	Major	Major	5.45974	3.40377	3.66274	4.20234	4.09154	4.57732	4.4962	4.75996	5.13622	3.6408	5.45974	3.40377	3.66274	4.20234	4.09154	4.57732	4.4962	4.75996	5.13622	3.6408	0.358072	4.34306	0.884351	0.398253	0.585008	-6.54478	NonSig	1	Single-promoter
790	ENSG00000101347	SAMHD1	chr20	36951714	-	FALSE	1	FB-PB.3079.1,FB-PB.3079.2,FB-PB.3079.3	7.01901	7.01901	5.72572	5.72572	Major	Major	7.20019	6.3988	7.41437	7.01131	7.07039	5.20726	6.01403	5.73309	6.48583	5.18838	7.20019	6.3988	7.41437	7.01131	7.07039	5.20726	6.01403	5.73309	6.48583	5.18838	-1.29329	6.37236	-4.4938	0.00129926	0.0151387	-1.0641	DownReg	1	Single-promoter
791	ENSG00000101350	KIF3B	chr20	32277664	+	FALSE	1	FB-PB.3066.1	1.90371	1.90371	2.19723	2.19723	Major	Major	1.88288	0.969653	1.88435	1.60792	3.17378	0	2.90118	2.63669	2.07153	3.37677	1.88288	0.969653	1.88435	1.60792	3.17378	0	2.90118	2.63669	2.07153	3.37677	0.293518	2.05047	0.460719	0.655326	0.798085	-6.84124	NonSig	1	Single-promoter
792	ENSG00000101361	NOP56	chr20	2652659	+	FALSE	1	FB-PB.3022.1	6.83088	6.83088	6.55534	6.55534	Major	Major	7.36609	6.69412	7.41437	6.52577	6.15402	7.0171	6.41134	6.75972	6.37883	6.20971	7.36609	6.69412	7.41437	6.52577	6.15402	7.0171	6.41134	6.75972	6.37883	6.20971	-0.275534	6.69311	-1.00197	0.341102	0.531386	-6.43379	NonSig	1	Single-promoter
793	ENSG00000101407	TTI1	chr20	38033442	-	FALSE	1	FB-PB.3084.1	2.18172	2.18172	2.57777	2.57777	Major	Major	0.922984	0.969653	3.66274	2.34943	3.00379	2.42137	2.40969	2.80004	2.3981	2.85963	0.922984	0.969653	3.66274	2.34943	3.00379	2.42137	2.40969	2.80004	2.3981	2.85963	0.396045	2.37974	0.767753	0.461219	0.64191	-6.64311	NonSig	1	Single-promoter
794	ENSG00000101413	RPRD1B	chr20	38033529	+	FALSE	1	FB-PB.3081.1	4.79949	4.79949	4.80112	4.80112	Major	Major	4.24189	5.1498	4.70731	4.94005	4.95839	4.97717	4.80529	5.047	4.25943	4.91673	4.24189	5.1498	4.70731	4.94005	4.95839	4.97717	4.80529	5.047	4.25943	4.91673	0.00163626	4.80031	0.0077412	0.993983	1	-6.95614	NonSig	1	Single-promoter
795	ENSG00000101447	FAM83D	chr20	38926413	+	FALSE	1	FB-PB.3083.1	1.66372	1.66372	3.51684	3.51684	Major	Major	2.45422	1.95424	1.88435	2.0258	0	3.57192	3.26711	3.85003	3.25432	3.6408	2.45422	1.95424	1.88435	2.0258	0	3.57192	3.26711	3.85003	3.25432	3.6408	1.85312	2.59028	4.47011	0.00134621	0.0154775	-1.10082	UpReg	1	Single-promoter
796	ENSG00000101452	DHX35	chr20	38962360	+	FALSE	1	FB-PB.3085.1	2.15617	2.15617	2.74682	2.74682	Major	Major	3.03003	2.27306	2.86414	2.6136	0	3.57192	2.40969	2.45245	2.66422	2.63581	3.03003	2.27306	2.86414	2.6136	0	3.57192	2.40969	2.45245	2.66422	2.63581	0.590652	2.45149	1.07358	0.309422	0.501164	-6.36075	NonSig	1	Single-promoter
797	ENSG00000101557	USP14	chr18	158539	+	FALSE	1	FB-PB.2313.1,FB-PB.2313.2,FB-PB.2313.3,FB-PB.2313.4	5.53328	5.53328	5.7938	5.7938	Major	Major	5.7271	5.79772	5.37079	5.55712	5.21367	6.05207	5.31551	5.92234	5.73663	5.94244	5.7271	5.79772	5.37079	5.55712	5.21367	6.05207	5.31551	5.92234	5.73663	5.94244	0.260516	5.66354	1.46516	0.17505	0.348499	-5.89712	NonSig	1	Single-promoter
798	ENSG00000101558	VAPA	chr18	9914029	+	FALSE	1	FB-PB.2327.1,FB-PB.2327.2,FB-PB.2327.3,FB-PB.2327.4	7.0728	7.0728	6.98619	6.98619	Major	Major	7.17358	7.19645	7.02469	7.13208	6.83719	6.92957	7.08534	7.32019	6.79416	6.80171	7.17358	7.19645	7.02469	7.13208	6.83719	6.92957	7.08534	7.32019	6.79416	6.80171	-0.0866028	7.0295	-0.622063	0.548482	0.716556	-6.74853	NonSig	1	Single-promoter
799	ENSG00000101577	LPIN2	chr18	3013166	-	FALSE	1	FB-PB.2317.1	2.55812	2.55812	2.48237	2.48237	Major	Major	3.03003	0	3.55673	3.03005	3.17378	2.42137	3.09572	2.45245	2.07153	2.37077	3.03003	0	3.55673	3.03005	3.17378	2.42137	3.09572	2.45245	2.07153	2.37077	-0.0757491	2.52024	-0.122562	0.904998	0.961642	-6.94796	NonSig	1	Single-promoter
800	ENSG00000101596	SMCHD1	chr18	2655653	+	FALSE	1	FB-PB.2315.1	4.56854	4.56854	4.40581	4.40581	Major	Major	4.54849	4.11206	4.97764	4.67679	4.52771	3.57192	5.19327	4.54641	4.3377	4.37975	4.54849	4.11206	4.97764	4.67679	4.52771	3.57192	5.19327	4.54641	4.3377	4.37975	-0.162726	4.48717	-0.574949	0.578635	0.737266	-6.77828	NonSig	1	Single-promoter
801	ENSG00000101654	RNMT	chr18	13726693	+	FALSE	1	FB-PB.2336.2,FB-PB.2336.3	4.34152	4.34152	4.91873	4.91873	Major	Major	3.85205	4.58502	4.60463	4.20234	4.46357	4.28662	5.42819	4.91061	4.48255	5.48568	3.85205	4.58502	4.60463	4.20234	4.46357	4.28662	5.42819	4.91061	4.48255	5.48568	0.577211	4.63013	2.12869	0.0604608	0.177575	-4.93028	NonSig	1	Single-promoter
802	ENSG00000101751	POLI	chr18	54269523	+	FALSE	1	FB-PB.2380.1	4.52242	4.52242	3.42933	3.42933	Major	Major	4.49216	4.11206	4.60463	4.49218	4.91108	2.42137	3.42029	3.992	4.08887	3.2241	4.49216	4.11206	4.60463	4.49218	4.91108	2.42137	3.42029	3.992	4.08887	3.2241	-1.0931	3.97587	-3.50602	0.0060923	0.0397165	-2.65354	DownReg	1	Single-promoter
803	ENSG00000101782	RIOK3	chr18	23453280	+	FALSE	1	FB-PB.2342.1,FB-PB.2342.2,FB-PB.2342.3	5.96408	5.96408	5.64944	5.64944	Major	Major	5.48882	6.26137	6.23792	5.61855	6.21373	5.36809	5.53271	6.13624	5.79328	5.4169	5.48882	6.26137	6.23792	5.61855	6.21373	5.36809	5.53271	6.13624	5.79328	5.4169	-0.314634	5.80676	-1.42934	0.184834	0.359215	-5.94358	NonSig	1	Single-promoter
804	ENSG00000101868	POLA1	chrX	24693918	+	FALSE	1	FB-PB.5262.1	3.2343	3.2343	3.42811	3.42811	Major	Major	2.6727	3.11553	3.4423	3.03005	3.91094	4.11587	2.40969	3.69256	3.54569	3.37677	2.6727	3.11553	3.4423	3.03005	3.91094	4.11587	2.40969	3.69256	3.54569	3.37677	0.193811	3.33121	0.581482	0.574401	0.734019	-6.77428	NonSig	1	Single-promoter
805	ENSG00000101871	MID1	chrX	10620584	-	FALSE	1	FB-PB.5246.2,FB-PB.5246.1	4.45501	4.45501	3.13189	3.13189	Major	Major	4.24189	4.26371	4.37437	5.39102	4.00406	3.10843	3.42029	3.60687	2.66422	2.85963	4.24189	4.26371	4.37437	5.39102	4.00406	3.10843	3.42029	3.60687	2.66422	2.85963	-1.32312	3.79345	-4.62661	0.00106632	0.0134335	-0.859539	DownReg	1	Single-promoter
806	ENSG00000101888	NXT2	chrX	109536845	+	FALSE	1	FB-PB.5351.1	1.82081	1.82081	1.89318	1.89318	Major	Major	1.88288	1.95424	2.45587	0	2.81107	2.09343	1.65846	1.69453	1.64871	2.37077	1.88288	1.95424	2.45587	0	2.81107	2.09343	1.65846	1.69453	1.64871	2.37077	0.0723711	1.857	0.153163	0.881461	0.94463	-6.94335	NonSig	1	Single-promoter
807	ENSG00000101935	AMMECR1	chrX	110318092	-	FALSE	1	FB-PB.5352.1,FB-PB.5352.2	4.13785	4.13785	4.37158	4.37158	Major	Major	4.6027	5.06973	4.1738	3.83923	3.00379	4.7033	4.10232	4.40125	5.13622	3.51481	4.6027	5.06973	4.1738	3.83923	3.00379	4.7033	4.10232	4.40125	5.13622	3.51481	0.233732	4.25472	0.560711	0.587924	0.744742	-6.78684	NonSig	1	Single-promoter
808	ENSG00000101972	STAG2	chrX	123961717	+	FALSE	1	FB-PB.5367.1,FB-PB.5367.2	4.52425	4.52425	4.40844	4.40844	Major	Major	3.9389	4.18988	4.89303	4.78793	4.81154	4.50995	4.42556	4.45128	4.79152	3.8639	3.9389	4.18988	4.89303	4.78793	4.81154	4.50995	4.42556	4.45128	4.79152	3.8639	-0.115811	4.46635	-0.481725	0.640864	0.789302	-6.83065	NonSig	1	Single-promoter
809	ENSG00000101986	ABCD1	chrX	153724855	+	FALSE	1	FB-PB.5388.1	0.902277	0.902277	2.06366	2.06366	Major	Major	1.48133	0	0	3.03005	0	2.42137	1.05547	1.31681	2.88882	2.63581	1.48133	0	0	3.03005	0	2.42137	1.05547	1.31681	2.88882	2.63581	1.16138	1.48297	1.77604	0.107572	0.255256	-5.46624	NonSig	1	Single-promoter
810	ENSG00000102024	PLS3	chrX	115561128	+	FALSE	1	FB-PB.5356.1,FB-PB.5356.3,FB-PB.5356.2	7.25559	10.7542	7.25042	12.0774	Major	Major	6.72568	7.09896	7.12083	7.37394	7.95851	7.05304	7.02689	7.39878	6.84864	7.92473	11.6597	11.0415	9.5767	9.72336	11.7699	11.4923	12.1325	12.3792	10.844	13.5389	-0.00516947	7.253	-0.0191442	0.985121	1	-6.95597	NonSig	2	Multiple-promoter
811	ENSG00000102024	PLS3	chrX	115593507	+	FALSE	2	FB-PB.5356.4,FB-PB.5356.5	3.49865	10.7542	4.82696	12.0774	Minor	Minor	4.934	3.94257	2.45587	2.34943	3.81138	4.43928	5.10561	4.98041	3.99538	5.61413	11.6597	11.0415	9.5767	9.72336	11.7699	11.4923	12.1325	12.3792	10.844	13.5389	1.32831	4.16281	2.54292	0.0302339	0.11448	-4.26075	NonSig	2	Multiple-promoter
812	ENSG00000102038	SMARCA1	chrX	129523520	-	FALSE	1	FB-PB.5368.1	5.69566	5.69566	5.51715	5.51715	Major	Major	5.59961	5.77264	5.86855	5.64831	5.58921	5.02622	5.31551	5.90449	5.55195	5.7876	5.59961	5.77264	5.86855	5.64831	5.58921	5.02622	5.31551	5.90449	5.55195	5.7876	-0.17851	5.60641	-1.0102	0.337343	0.528979	-6.42561	NonSig	1	Single-promoter
813	ENSG00000102144	PGK1	chrX	78104246	+	FALSE	1	FB-PB.5327.1	7.26654	7.26654	7.94432	7.94432	Major	Major	7.32637	7.59002	6.92168	7.02271	7.47192	7.79512	7.91578	8.3089	7.66398	8.03785	7.32637	7.59002	6.92168	7.02271	7.47192	7.79512	7.91578	8.3089	7.66398	8.03785	0.677783	7.60543	3.8166	0.0036972	0.0286278	-2.14244	NonSig	1	Single-promoter
814	ENSG00000102158	MAGT1	chrX	77895435	-	FALSE	1	FB-PB.5325.1,FB-PB.5325.3	6.48017	6.48017	6.85769	6.85769	Major	Major	5.7271	6.26137	6.86728	6.9409	6.6042	7.00491	6.35544	6.8464	6.70838	7.37331	5.7271	6.26137	6.86728	6.9409	6.6042	7.00491	6.35544	6.8464	6.70838	7.37331	0.377518	6.66893	1.39966	0.193292	0.369604	-5.98151	NonSig	1	Single-promoter
815	ENSG00000102181	CD99L2	chrX	150898622	-	FALSE	1	FB-PB.5387.1	5.12294	5.12294	4.65549	4.65549	Major	Major	5.36882	5.06973	5.43204	4.28044	5.46367	4.50995	4.68948	4.67829	4.94942	4.45028	5.36882	5.06973	5.43204	4.28044	5.46367	4.50995	4.68948	4.67829	4.94942	4.45028	-0.467453	4.88921	-1.98976	0.0760377	0.207501	-5.14625	NonSig	1	Single-promoter
816	ENSG00000102225	CDK16	chrX	47218720	+	FALSE	1	FB-PB.5280.1	4.58411	4.58411	4.99661	4.99661	Major	Major	4.43354	4.98495	4.31056	4.28044	4.91108	5.11957	4.4962	5.01409	5.34012	5.01308	4.43354	4.98495	4.31056	4.28044	4.91108	5.11957	4.4962	5.01409	5.34012	5.01308	0.4125	4.79036	1.99315	0.0756151	0.206886	-5.14104	NonSig	1	Single-promoter
817	ENSG00000102226	USP11	chrX	47233009	+	FALSE	1	FB-PB.5282.1,FB-PB.5282.2	6.19495	8.26152	5.88251	7.48788	Major	Major	6.88728	5.84659	6.03573	6.01104	6.1941	5.70577	5.80731	6.10533	5.58442	6.20971	9.91731	7.80083	6.95967	8.84784	7.78195	7.37407	5.80731	8.34652	7.65595	8.25555	-0.31244	6.03873	-1.44019	0.181822	0.355664	-5.92959	NonSig	2	Multiple-promoter
818	ENSG00000102226	USP11	chrX	47233421	+	FALSE	2	FB-PB.5282.3	2.06657	8.26152	1.60537	7.48788	Minor	Minor	3.03003	1.95424	0.923938	2.8368	1.58785	1.6683	0	2.24119	2.07153	2.04584	9.91731	7.80083	6.95967	8.84784	7.78195	7.37407	5.80731	8.34652	7.65595	8.25555	-0.461199	1.83597	-0.873582	0.403806	0.59056	-6.55436	NonSig	2	Multiple-promoter
819	ENSG00000102241	HTATSF1	chrX	136497234	+	FALSE	1	FB-PB.5379.1,FB-PB.5379.2	2.52807	8.07957	2.1974	7.66197	Minor	Minor	1.48133	0.969653	3.66274	3.35283	3.17378	2.68841	0	1.9936	2.66422	3.6408	6.28254	6.36916	9.15354	9.55658	9.03602	8.42398	5.1501	7.57769	8.24864	8.90944	-0.330663	2.36274	-0.439416	0.670149	0.80789	-6.85152	NonSig	2	Multiple-promoter
820	ENSG00000102241	HTATSF1	chrX	136497571	+	TRUE	2	FB-PB.5379.3	5.5515	8.07957	5.46457	7.66197	NA	NA	4.80121	5.39951	5.4908	6.20375	5.86224	5.73557	5.1501	5.58409	5.58442	5.26865	6.28254	6.36916	9.15354	9.55658	9.03602	8.42398	5.1501	7.57769	8.24864	8.90944	-0.0869349	5.50803	-0.343082	0.738979	0.852164	-6.89213	NonSig	2	Multiple-promoter
821	ENSG00000102302	FGD1	chrX	54495479	-	FALSE	1	FB-PB.5298.1	3.10465	3.10465	2.88222	2.88222	Major	Major	4.09833	3.26684	3.31801	2.8368	2.00325	4.20377	1.65846	3.51577	3.40734	1.62578	4.09833	3.26684	3.31801	2.8368	2.00325	4.20377	1.65846	3.51577	3.40734	1.62578	-0.222422	2.99344	-0.383414	0.70982	0.834657	-6.87631	NonSig	1	Single-promoter
822	ENSG00000102390	PBDC1	chrX	76173044	+	FALSE	1	FB-PB.5324.1	2.22682	2.22682	2.91933	2.91933	Major	Major	3.31619	0	2.19823	3.61643	2.00325	2.68841	2.67627	3.60687	3.25432	2.37077	3.31619	0	2.19823	3.61643	2.00325	2.68841	2.67627	3.60687	3.25432	2.37077	0.692506	2.57307	1.1085	0.294816	0.486988	-6.32371	NonSig	1	Single-promoter
823	ENSG00000102401	ARMCX3	chrX	101623145	+	FALSE	1	FB-PB.5338.1,FB-PB.5338.2,FB-PB.5338.3,FB-PB.5338.4,FB-PB.5338.5	5.94044	5.94044	5.8954	5.8954	Major	Major	5.91021	5.87042	5.57467	5.91636	6.43055	5.76476	5.98975	5.73309	6.2018	5.7876	5.91021	5.87042	5.57467	5.91636	6.43055	5.76476	5.98975	5.73309	6.2018	5.7876	-0.0450421	5.91792	-0.259552	0.800726	0.892276	-6.91942	NonSig	1	Single-promoter
824	ENSG00000102471	NDFIP2	chr13	79481364	+	FALSE	1	FB-PB.1492.1	4.47016	4.47016	4.03126	4.03126	Major	Major	3.44047	5.46358	5.01815	4.03217	4.39645	3.81459	4.19017	4.49963	3.78798	3.8639	3.44047	5.46358	5.01815	4.03217	4.39645	3.81459	4.19017	4.49963	3.78798	3.8639	-0.438908	4.25071	-1.21658	0.253015	0.440714	-6.20338	NonSig	1	Single-promoter
825	ENSG00000102531	FNDC3A	chr13	48975927	+	FALSE	1	FB-PB.1467.1	5.53019	11.4633	4.756	10.7061	Minor	Minor	5.13131	5.26215	6.05533	5.70606	5.49609	4.36497	5.2759	4.54641	4.94942	4.64328	10.7573	10.8745	12.5871	11.8691	11.2283	10.3932	10.9061	10.5548	11.0426	10.6338	-0.774189	5.14309	-3.40045	0.00723745	0.0443201	-2.82899	NonSig	2	Multiple-promoter
826	ENSG00000102531	FNDC3A	chr13	49186061	+	TRUE	2	FB-PB.1467.2	5.93307	11.4633	5.9501	10.7061	NA	NA	5.62602	5.61231	6.53174	6.16309	5.73217	6.02819	5.63017	6.0084	6.09317	5.99056	10.7573	10.8745	12.5871	11.8691	11.2283	10.3932	10.9061	10.5548	11.0426	10.6338	0.017031	5.94158	0.0847595	0.934205	0.979751	-6.95224	NonSig	2	Multiple-promoter
827	ENSG00000102547	CAB39L	chr13	49444063	-	FALSE	1	FB-PB.1465.1	2.93742	2.93742	3.02813	3.02813	Major	Major	2.8624	2.94647	2.6744	3.03005	3.17378	3.10843	3.09572	2.80004	3.08311	3.05334	2.8624	2.94647	2.6744	3.03005	3.17378	3.10843	3.09572	2.80004	3.08311	3.05334	0.0907088	2.98277	0.71303	0.492904	0.668466	-6.68504	NonSig	1	Single-promoter
828	ENSG00000102554	KLF5	chr13	73059005	+	FALSE	1	FB-PB.1484.1	5.66475	5.66475	5.09621	5.09621	Major	Major	5.45974	7.13875	4.89303	5.61855	5.21367	5.58002	4.74855	4.59173	5.41424	5.14651	5.45974	7.13875	4.89303	5.61855	5.21367	5.58002	4.74855	4.59173	5.41424	5.14651	-0.568542	5.38048	-1.40417	0.191987	0.367466	-5.97578	NonSig	1	Single-promoter
829	ENSG00000102580	DNAJC3	chr13	95677145	+	FALSE	1	FB-PB.1503.1,FB-PB.1503.2	6.32004	6.32004	6.41901	6.41901	Major	Major	6.33533	6.36565	5.628	6.40893	6.86228	6.38852	6.27736	6.51119	6.24306	6.67491	6.33533	6.36565	5.628	6.40893	6.86228	6.38852	6.27736	6.51119	6.24306	6.67491	0.0989695	6.36952	0.463108	0.653674	0.797218	-6.84006	NonSig	1	Single-promoter
830	ENSG00000102699	PARP4	chr13	24469993	-	TRUE	2	FB-PB.1407.2	5.00236	8.30394	5.10168	8.32204	NA	NA	5.48882	4.69586	4.97764	4.89111	4.95839	5.51277	4.96325	4.83725	5.09174	5.10339	9.58716	7.81139	8.91842	7.24053	7.96219	7.93415	8.38354	8.15149	7.98055	9.16047	0.0993167	5.05202	0.547865	0.596373	0.751314	-6.79439	NonSig	2	Multiple-promoter
831	ENSG00000102699	PARP4	chr13	24512762	-	FALSE	1	FB-PB.1407.1	3.30157	8.30394	3.22036	8.32204	Minor	Minor	4.09833	3.11553	3.94079	2.34943	3.00379	2.42137	3.42029	3.31424	2.88882	4.05708	9.58716	7.81139	8.91842	7.24053	7.96219	7.93415	8.38354	8.15149	7.98055	9.16047	-0.081213	3.26097	-0.204772	0.842054	0.922586	-6.93327	NonSig	2	Multiple-promoter
832	ENSG00000102753	KPNA3	chr13	49792698	-	FALSE	1	FB-PB.1468.1,FB-PB.1468.3,FB-PB.1468.2,FB-PB.1468.4	4.63727	4.63727	5.46672	5.46672	Major	Major	4.80121	4.84763	4.97764	4.03217	4.52771	5.44224	5.72146	5.25847	5.17937	5.73206	4.80121	4.84763	4.97764	4.03217	4.52771	5.44224	5.72146	5.25847	5.17937	5.73206	0.829448	5.052	4.03644	0.002615	0.0234599	-1.78635	NonSig	1	Single-promoter
833	ENSG00000102763	VWA8	chr13	41691436	-	FALSE	1	FB-PB.1446.1	3.66974	3.66974	4.90498	4.90498	Major	Major	2.45422	4.18988	3.7615	4.03217	3.91094	5.11957	4.27298	5.73309	4.48255	4.91673	2.45422	4.18988	3.7615	4.03217	3.91094	5.11957	4.27298	5.73309	4.48255	4.91673	1.23524	4.28736	3.25407	0.00920654	0.051604	-3.07327	NonSig	1	Single-promoter
834	ENSG00000102786	INTS6	chr13	51453031	-	FALSE	1	FB-PB.1470.1	7.04268	7.04268	6.17432	6.17432	Major	Major	7.49351	7.61844	6.03573	7.14257	6.92316	6.31148	6.17341	6.33586	6.26326	5.7876	7.49351	7.61844	6.03573	7.14257	6.92316	6.31148	6.17341	6.33586	6.26326	5.7876	-0.868361	6.6085	-3.0324	0.0133002	0.0672223	-3.44451	NonSig	1	Single-promoter
835	ENSG00000102802	MEDAG	chr13	30906260	+	FALSE	1	FB-PB.1424.1	6.46859	6.46859	6.37214	6.37214	Major	Major	6.18354	6.36565	5.65394	7.79569	6.34413	5.64426	6.46516	7.14127	6.3602	6.24981	6.18354	6.36565	5.65394	7.79569	6.34413	5.64426	6.46516	7.14127	6.3602	6.24981	-0.096449	6.42037	-0.239797	0.815563	0.904436	-6.92479	NonSig	1	Single-promoter
836	ENSG00000102858	MGRN1	chr16	4624827	+	FALSE	1	FB-PB.1912.1	3.86572	3.86572	4.2234	4.2234	Major	Major	4.54849	3.26684	3.31801	3.49064	4.70461	3.92216	4.42556	3.992	4.54987	4.22742	4.54849	3.26684	3.31801	3.49064	4.70461	3.92216	4.42556	3.992	4.54987	4.22742	0.357685	4.04456	1.11792	0.29097	0.484085	-6.31356	NonSig	1	Single-promoter
837	ENSG00000102901	CENPT	chr16	67833914	-	FALSE	1	FB-PB.2014.1	4.82545	4.82545	4.59233	4.59233	Major	Major	4.84684	4.84763	5.01815	5.16261	4.25204	5.07365	4.4962	3.85003	4.67574	4.86603	4.84684	4.84763	5.01815	5.16261	4.25204	5.07365	4.4962	3.85003	4.67574	4.86603	-0.233121	4.70889	-0.919012	0.380745	0.568723	-6.51327	NonSig	1	Single-promoter
838	ENSG00000102908	NFAT5	chr16	69565966	+	FALSE	1	FB-PB.2026.1	6.5989	6.5989	6.04952	6.04952	Major	Major	6.99255	7.53144	5.99571	6.20375	6.27107	6.14382	6.21589	6.07374	6.39722	5.4169	6.99255	7.53144	5.99571	6.20375	6.27107	6.14382	6.21589	6.07374	6.39722	5.4169	-0.549387	6.32421	-1.73519	0.114835	0.264661	-5.52542	NonSig	1	Single-promoter
839	ENSG00000102910	LONP2	chr16	48244276	+	FALSE	1	FB-PB.1979.1,FB-PB.1979.2,FB-PB.1979.3,FB-PB.1979.4	4.81403	4.81403	4.40423	4.40423	Major	Major	5.70249	4.46494	4.65688	4.03217	5.21367	4.76239	4.42556	3.992	4.25943	4.58177	5.70249	4.46494	4.65688	4.03217	5.21367	4.76239	4.42556	3.992	4.25943	4.58177	-0.409799	4.60913	-1.3376	0.212048	0.393373	-6.05911	NonSig	1	Single-promoter
840	ENSG00000102974	CTCF	chr16	67611006	+	FALSE	1	FB-PB.2012.1	6.14111	6.14111	6.22948	6.22948	Major	Major	6.01387	6.06883	6.13116	6.33765	6.15402	6.33113	6.42951	6.0084	6.07043	6.30795	6.01387	6.06883	6.13116	6.33765	6.15402	6.33113	6.42951	6.0084	6.07043	6.30795	0.088376	6.18529	0.708657	0.495494	0.669518	-6.68827	NonSig	1	Single-promoter
841	ENSG00000103018	CYB5B	chr16	69424620	+	FALSE	1	FB-PB.2024.1	5.79899	5.79899	6.14314	6.14314	Major	Major	6.12917	6.26137	6.18553	4.89111	5.5278	6.209	5.96506	6.19615	6.26326	6.08226	6.12917	6.26137	6.18553	4.89111	5.5278	6.209	5.96506	6.19615	6.26326	6.08226	0.344148	5.97107	1.32568	0.215822	0.398032	-6.07375	NonSig	1	Single-promoter
842	ENSG00000103037	SETD6	chr16	58515500	+	FALSE	1	FB-PB.2001.1	0.717787	0.717787	1.2293	1.2293	Major	Major	0	0	0	0	3.58894	1.06295	2.40969	0	1.04808	1.62578	0	0	0	0	3.58894	1.06295	2.40969	0	1.04808	1.62578	0.511512	0.973544	0.677116	0.51442	0.686011	-6.71105	NonSig	1	Single-promoter
843	ENSG00000103042	SLC38A7	chr16	58684743	-	FALSE	1	FB-PB.2000.1	0.572828	0.572828	3.687	3.687	Major	Major	0	0	2.86414	0	0	3.57192	3.26711	3.60687	3.40734	4.58177	0	0	2.86414	0	0	3.57192	3.26711	3.60687	3.40734	4.58177	3.11418	2.12992	5.43869	0.000336666	0.00639209	0.33622	UpReg	1	Single-promoter
844	ENSG00000103043	VAC14	chr16	70801170	-	FALSE	1	FB-PB.2030.1,FB-PB.2030.3	3.57728	3.57728	4.06364	4.06364	Major	Major	3.55488	4.40093	4.31056	4.03217	1.58785	4.36497	4.10232	4.12123	4.08887	3.6408	3.55488	4.40093	4.31056	4.03217	1.58785	4.36497	4.10232	4.12123	4.08887	3.6408	0.486356	3.82046	0.98303	0.349872	0.539498	-6.45243	NonSig	1	Single-promoter
845	ENSG00000103047	TANGO6	chr16	68843534	+	FALSE	1	FB-PB.2021.1	2.68904	2.68904	3.15614	3.15614	Major	Major	3.66089	2.27306	2.6744	2.0258	2.81107	2.42137	3.42029	2.63669	3.54569	3.75666	3.66089	2.27306	2.6744	2.0258	2.81107	2.42137	3.42029	2.63669	3.54569	3.75666	0.467096	2.92259	1.28626	0.228699	0.414386	-6.12148	NonSig	1	Single-promoter
846	ENSG00000103051	COG4	chr16	70523548	-	FALSE	1	FB-PB.2029.1,FB-PB.2029.2	3.17521	3.17521	3.95586	3.95586	Major	Major	2.6727	3.75048	3.4423	2.8368	3.17378	4.28662	4.19017	3.992	3.08311	4.22742	2.6727	3.75048	3.4423	2.8368	3.17378	4.28662	4.19017	3.992	3.08311	4.22742	0.780651	3.56554	2.72959	0.0220884	0.0941702	-3.95111	NonSig	1	Single-promoter
847	ENSG00000103061	SLC7A6OS	chr16	68310965	-	FALSE	1	FB-PB.2020.1	2.86397	2.86397	3.19092	3.19092	Major	Major	2.19665	3.52883	2.86414	2.0258	3.70444	3.43334	3.55876	2.24119	2.66422	4.05708	2.19665	3.52883	2.86414	2.0258	3.70444	3.43334	3.55876	2.24119	2.66422	4.05708	0.326945	3.02744	0.74436	0.474599	0.653137	-6.66137	NonSig	1	Single-promoter
848	ENSG00000103064	SLC7A6	chr16	68264528	+	FALSE	1	FB-PB.2019.1	1.00048	1.00048	1.98965	1.98965	Major	Major	0	1.54436	2.45587	0	1.00217	0	3.80124	2.45245	1.64871	2.04584	0	1.54436	2.45587	0	1.00217	0	3.80124	2.45245	1.64871	2.04584	0.98917	1.49506	1.38454	0.197726	0.375698	-6.00063	NonSig	1	Single-promoter
849	ENSG00000103066	PLA2G15	chr16	68245373	+	FALSE	1	FB-PB.2017.1	4.09023	4.09023	4.0012	4.0012	Major	Major	5.48882	4.11206	3.55673	4.11976	3.17378	4.20377	4.42556	3.77344	4.54987	3.05334	5.48882	4.11206	3.55673	4.11976	3.17378	4.20377	4.42556	3.77344	4.54987	3.05334	-0.0890337	4.04571	-0.199806	0.845828	0.925621	-6.93436	NonSig	1	Single-promoter
850	ENSG00000103091	WDR59	chr16	74985120	-	FALSE	1	FB-PB.2040.1	3.92588	3.92588	3.55675	3.55675	Major	Major	3.03003	4.11206	4.37437	3.93892	4.17402	3.28001	3.80124	3.51577	3.67191	3.51481	3.03003	4.11206	4.37437	3.93892	4.17402	3.28001	3.80124	3.51577	3.67191	3.51481	-0.369131	3.74131	-1.5057	0.164525	0.333749	-5.84369	NonSig	1	Single-promoter
851	ENSG00000103126	AXIN1	chr16	352404	-	FALSE	1	FB-PB.1886.1	1.40751	1.40751	0.629829	0.629829	Major	Major	1.88288	1.95424	0	3.20045	0	1.06295	1.05547	0	0	1.03072	1.88288	1.95424	0	3.20045	0	1.06295	1.05547	0	0	1.03072	-0.777683	1.01867	-1.25165	0.240524	0.42622	-6.16256	NonSig	1	Single-promoter
852	ENSG00000103148	NPRL3	chr16	138692	-	TRUE	1	FB-PB.1881.1,FB-PB.1881.4,FB-PB.1881.3	3.4432	3.4432	3.38789	3.38789	NA	NA	4.30864	3.84972	3.85393	3.20045	2.00325	3.57192	3.68509	2.45245	4.17667	3.05334	4.30864	3.84972	3.85393	3.20045	2.00325	3.57192	3.68509	2.45245	4.17667	3.05334	-0.0553043	3.41555	-0.119269	0.907537	0.961642	-6.94839	NonSig	1	Single-promoter
853	ENSG00000103160	HSDL1	chr16	84145168	-	FALSE	1	FB-PB.2050.1	2.39986	2.39986	2.00849	2.00849	Major	Major	1.48133	2.27306	2.45587	3.20045	2.58858	1.06295	2.40969	2.45245	2.07153	2.04584	1.48133	2.27306	2.45587	3.20045	2.58858	1.06295	2.40969	2.45245	2.07153	2.04584	-0.391367	2.20417	-1.10762	0.295179	0.487362	-6.32465	NonSig	1	Single-promoter
854	ENSG00000103194	USP10	chr16	84700004	+	FALSE	1	FB-PB.2053.2,FB-PB.2053.3,FB-PB.2053.1	5.89482	5.89482	6.00798	6.00798	Major	Major	5.16773	6.89336	5.09591	6.18356	6.13356	5.73557	5.88834	6.40095	5.76523	6.24981	5.16773	6.89336	5.09591	6.18356	6.13356	5.73557	5.88834	6.40095	5.76523	6.24981	0.113158	5.9514	0.32761	0.750284	0.860543	-6.89774	NonSig	1	Single-promoter
855	ENSG00000103196	CRISPLD2	chr16	84819981	+	FALSE	1	FB-PB.2055.1	7.23322	7.23322	8.02119	8.02119	Major	Major	7.26886	7.15824	7.22833	7.61155	6.89912	8.3565	7.8566	8.02078	8.03674	7.83532	7.26886	7.15824	7.22833	7.61155	6.89912	8.3565	7.8566	8.02078	8.03674	7.83532	0.787967	7.6272	4.90299	0.000712619	0.0102649	-0.44183	NonSig	1	Single-promoter
856	ENSG00000103197	TSC2	chr16	2047994	+	FALSE	1	FB-PB.1893.1	3.50206	3.50206	1.95209	1.95209	Major	Major	3.44047	3.64391	3.7615	3.49064	3.17378	2.09343	3.26711	1.31681	3.08311	0	3.44047	3.64391	3.7615	3.49064	3.17378	2.09343	3.26711	1.31681	3.08311	0	-1.54997	2.72708	-2.74142	0.0216534	0.0931264	-3.93139	NonSig	1	Single-promoter
857	ENSG00000103249	CLCN7	chr16	1475040	-	FALSE	1	FB-PB.1902.1	3.84026	3.84026	3.39477	3.39477	Major	Major	4.65494	2.94647	4.2438	3.03005	4.32605	3.28001	3.42029	3.41852	3.99538	2.85963	4.65494	2.94647	4.2438	3.03005	4.32605	3.28001	3.42029	3.41852	3.99538	2.85963	-0.445497	3.61751	-1.18688	0.263996	0.453723	-6.23727	NonSig	1	Single-promoter
858	ENSG00000103257	SLC7A5	chr16	87869505	-	FALSE	1	FB-PB.2060.1	6.2475	6.2475	6.44762	6.44762	Major	Major	7.63679	7.09896	4.2438	6.52577	5.73217	6.27135	6.59958	6.99715	6.50292	5.8671	7.63679	7.09896	4.2438	6.52577	5.73217	6.27135	6.59958	6.99715	6.50292	5.8671	0.200118	6.34756	0.3479	0.735471	0.850197	-6.89033	NonSig	1	Single-promoter
859	ENSG00000103264	FBXO31	chr16	87383757	-	FALSE	1	FB-PB.2057.1,FB-PB.2057.2	4.98689	4.98689	3.89176	3.89176	Major	Major	4.97568	5.84659	4.65688	5.20328	4.25204	3.81459	4.10232	3.41852	4.48255	3.6408	4.97568	5.84659	4.65688	5.20328	4.25204	3.81459	4.10232	3.41852	4.48255	3.6408	-1.09514	4.43933	-3.5252	0.00590538	0.0388862	-2.62175	DownReg	1	Single-promoter
860	ENSG00000103275	UBE2I	chr16	1309644	+	FALSE	1	FB-PB.1888.1	4.91834	4.91834	5.19574	5.19574	Major	Major	4.6027	4.40093	5.37079	4.89111	5.32616	5.40564	5.01228	5.23009	4.94942	5.38124	4.6027	4.40093	5.37079	4.89111	5.32616	5.40564	5.01228	5.23009	4.94942	5.38124	0.2774	5.05704	1.29566	0.225572	0.409732	-6.11019	NonSig	1	Single-promoter
861	ENSG00000103335	PIEZO1	chr16	88723939	-	FALSE	1	FB-PB.2066.1	4.3771	4.3771	5.46546	5.46546	Major	Major	3.55488	4.58502	4.49409	4.78793	4.46357	5.07365	5.1501	5.81179	5.64724	5.64453	3.55488	4.58502	4.49409	4.78793	4.46357	5.07365	5.1501	5.81179	5.64724	5.64453	1.08837	4.92128	4.30056	0.00173979	0.018033	-1.36598	UpReg	1	Single-promoter
863	ENSG00000103342	GSPT1	chr16	11915950	-	FALSE	1	FB-PB.1920.1,FB-PB.1920.3	6.8371	6.8371	6.96228	6.96228	Major	Major	7.47182	7.56833	5.97528	6.49334	6.67672	6.75143	7.13045	6.97167	6.87513	7.08271	7.47182	7.56833	5.97528	6.49334	6.67672	6.75143	7.13045	6.97167	6.87513	7.08271	0.12518	6.89969	0.421905	0.682447	0.814942	-6.85962	NonSig	1	Single-promoter
864	ENSG00000103351	CLUAP1	chr16	3501004	+	FALSE	1	FB-PB.1905.1	3.19155	3.19155	2.65434	2.65434	Major	Major	3.55488	3.11553	3.7615	3.20045	2.3254	2.09343	2.67627	3.20184	3.25432	2.04584	3.55488	3.11553	3.7615	3.20045	2.3254	2.09343	2.67627	3.20184	3.25432	2.04584	-0.537213	2.92294	-1.58533	0.145453	0.305724	-5.73617	NonSig	1	Single-promoter
865	ENSG00000103353	UBFD1	chr16	23557650	+	FALSE	1	FB-PB.1949.1	1.60741	1.60741	2.96978	2.96978	Major	Major	0	2.27306	0.923938	2.8368	2.00325	2.91365	2.67627	3.07993	2.66422	3.51481	0	2.27306	0.923938	2.8368	2.00325	2.91365	2.67627	3.07993	2.66422	3.51481	1.36237	2.28859	2.75421	0.0211931	0.0920562	-3.91006	NonSig	1	Single-promoter
866	ENSG00000103356	EARS2	chr16	23557374	-	FALSE	1	FB-PB.1948.1,FB-PB.1948.2,FB-PB.1948.3	2.50051	2.50051	2.80501	2.80501	Major	Major	2.8624	3.11553	3.18199	1.01725	2.3254	4.20377	2.67627	2.63669	1.64871	2.85963	2.8624	3.11553	3.18199	1.01725	2.3254	4.20377	2.67627	2.63669	1.64871	2.85963	0.3045	2.65276	0.573324	0.579691	0.737892	-6.77927	NonSig	1	Single-promoter
867	ENSG00000103365	GGA2	chr16	23510493	-	FALSE	1	FB-PB.1946.1,FB-PB.1946.2	4.7577	4.7577	4.58091	4.58091	Major	Major	5.79852	3.52883	5.05755	4.94005	4.46357	4.36497	5.01228	4.40125	4.67574	4.45028	5.79852	3.52883	5.05755	4.94005	4.46357	4.36497	5.01228	4.40125	4.67574	4.45028	-0.176799	4.66931	-0.477112	0.644026	0.791623	-6.83302	NonSig	1	Single-promoter
868	ENSG00000103381	CPPED1	chr16	12803869	-	FALSE	1	FB-PB.1921.1,FB-PB.1921.2	3.57469	3.57469	3.82692	3.82692	Major	Major	3.31619	3.11553	3.31801	4.03217	4.09154	4.11587	3.90873	3.41852	4.17667	3.51481	3.31619	3.11553	3.31801	4.03217	4.09154	4.11587	3.90873	3.41852	4.17667	3.51481	0.252232	3.70081	1.01359	0.335804	0.527538	-6.42222	NonSig	1	Single-promoter
869	ENSG00000103423	DNAJA3	chr16	4425868	+	FALSE	1	FB-PB.1907.2	0	0	0	0	Inactive	Inactive	0	0	0	0	0	0	0	0	0	0	0	0	0	0	0	0	0	0	0	0	0	0	0	1	1	-6.95617	NonSig	1	Single-promoter
870	ENSG00000103479	RBL2	chr16	53434460	+	FALSE	1	FB-PB.1985.1,FB-PB.1985.2,FB-PB.1985.3	4.89741	4.89741	3.96651	3.96651	Major	Major	5.16773	5.06973	5.37079	4.11976	4.75906	3.69835	3.90873	3.51577	4.25943	4.45028	5.16773	5.06973	5.37079	4.11976	4.75906	3.69835	3.90873	3.51577	4.25943	4.45028	-0.9309	4.43196	-3.45706	0.00659797	0.0418298	-2.73482	NonSig	1	Single-promoter
871	ENSG00000103494	RPGRIP1L	chr16	53703862	-	FALSE	1	FB-PB.1987.1	1.47877	1.47877	3.5296	3.5296	Major	Major	0	0	2.45587	2.34943	2.58858	3.57192	3.68509	3.60687	3.40734	3.37677	0	0	2.45587	2.34943	2.58858	3.57192	3.68509	3.60687	3.40734	3.37677	2.05082	2.50419	3.64011	0.00490377	0.0343088	-2.43186	UpReg	1	Single-promoter
872	ENSG00000103496	STX4	chr16	31033561	+	FALSE	1	FB-PB.1971.1	4.93137	4.93137	4.90351	4.90351	Major	Major	5.01619	4.84763	4.84879	4.94005	5.0042	4.97717	5.35406	4.45128	5.09174	4.64328	5.01619	4.84763	4.84879	4.94005	5.0042	4.97717	5.35406	4.45128	5.09174	4.64328	-0.0278682	4.91744	-0.160112	0.876133	0.940894	-6.94216	NonSig	1	Single-promoter
873	ENSG00000103544	VPS35L	chr16	19555720	+	FALSE	1	FB-PB.1933.1	3.49806	3.49806	3.85795	3.85795	Major	Major	4.02082	3.11553	3.31801	4.03217	3.00379	3.43334	4.4962	3.85003	3.99538	3.51481	4.02082	3.11553	3.31801	4.03217	3.00379	3.43334	4.4962	3.85003	3.99538	3.51481	0.359888	3.67801	1.27967	0.230913	0.415928	-6.12937	NonSig	1	Single-promoter
874	ENSG00000103549	RNF40	chr16	30762309	+	FALSE	1	FB-PB.1966.1,FB-PB.1966.2	5.02514	5.02514	4.64707	4.64707	Major	Major	4.80121	4.69586	5.46172	5.35537	4.81154	4.81916	4.85989	4.23984	4.61418	4.70228	4.80121	4.69586	5.46172	5.35537	4.81154	4.81916	4.85989	4.23984	4.61418	4.70228	-0.378072	4.8361	-1.91579	0.0858141	0.224435	-5.25882	NonSig	1	Single-promoter
875	ENSG00000103642	LACTB	chr15	63121830	+	FALSE	1	FB-PB.1805.1	5.55051	5.55051	5.38388	5.38388	Major	Major	5.30485	6.16831	4.37437	6.40893	5.49609	5.24918	5.77926	5.44287	5.30158	5.14651	5.30485	6.16831	4.37437	6.40893	5.49609	5.24918	5.77926	5.44287	5.30158	5.14651	-0.166631	5.46719	-0.470851	0.648331	0.7938	-6.83619	NonSig	1	Single-promoter
876	ENSG00000103769	RAB11A	chr15	65869466	+	FALSE	1	FB-PB.1817.1	8.07709	8.07709	7.97707	7.97707	Major	Major	8.00711	8.28314	8.12494	7.91067	8.0596	8.01759	7.95392	7.92223	7.97686	8.01476	8.00711	8.28314	8.12494	7.91067	8.0596	8.01759	7.95392	7.92223	7.97686	8.01476	-0.10002	8.02708	-0.950375	0.365384	0.554658	-6.48389	NonSig	1	Single-promoter
877	ENSG00000103855	CD276	chr15	73684236	+	FALSE	1	FB-PB.1836.1,FB-PB.1836.2,FB-PB.1836.3	3.18984	3.49871	3.55268	3.96916	Major	Major	1.88288	3.94257	3.18199	3.35283	3.58894	3.10843	3.80124	3.20184	3.78798	3.8639	1.88288	5.48692	3.18199	3.35283	3.58894	3.10843	5.88367	3.20184	3.78798	3.8639	0.362837	3.37126	0.994311	0.344628	0.534754	-6.44136	NonSig	2	Multiple-promoter
878	ENSG00000103855	CD276	chr15	73684487	+	FALSE	2	FB-PB.1836.4	0.308871	3.49871	0.416486	3.96916	Minor	Minor	0	1.54436	0	0	0	0	2.08243	0	0	0	1.88288	5.48692	3.18199	3.35283	3.58894	3.10843	5.88367	3.20184	3.78798	3.8639	0.107614	0.362679	0.222908	0.828308	0.914172	-6.92904	NonSig	2	Multiple-promoter
879	ENSG00000103888	CEMIP	chr15	80779370	+	FALSE	1	FB-PB.1855.1	0.522719	0.522719	4.07244	4.07244	Major	Major	0	0	0	2.6136	0	3.10843	4.27298	4.91061	4.84609	3.2241	0	0	0	2.6136	0	3.10843	4.27298	4.91061	4.84609	3.2241	3.54972	2.29758	5.89856	0.000182662	0.00441771	0.970544	UpReg	1	Single-promoter
881	ENSG00000103966	EHD4	chr15	41972576	-	FALSE	1	FB-PB.1742.1,FB-PB.1742.2	6.24625	6.24625	5.56243	5.56243	Major	Major	6.01387	6.26137	5.97528	6.6189	6.36183	5.6125	5.83483	5.01409	5.73663	5.61413	6.01387	6.26137	5.97528	6.6189	6.36183	5.6125	5.83483	5.01409	5.73663	5.61413	-0.683817	5.90434	-3.57956	0.00540731	0.0368449	-2.53179	NonSig	1	Single-promoter
883	ENSG00000103995	CEP152	chr15	48811079	-	FALSE	1	FB-PB.1764.1	0.58032	0.58032	3.64762	3.64762	Major	Major	0	0	1.88435	1.01725	0	4.02226	3.80124	3.31424	2.3981	4.70228	0	0	1.88435	1.01725	0	4.02226	3.80124	3.31424	2.3981	4.70228	3.06731	2.11397	6.09913	0.000141169	0.00373716	1.23761	UpReg	1	Single-promoter
884	ENSG00000104133	SPG11	chr15	44663663	-	FALSE	1	FB-PB.1762.1	3.86855	3.86855	3.56518	3.56518	Major	Major	4.09833	4.11206	4.60463	4.20234	2.3254	3.69835	3.80124	3.31424	3.78798	3.2241	4.09833	4.11206	4.60463	4.20234	2.3254	3.69835	3.80124	3.31424	3.78798	3.2241	-0.303368	3.71687	-0.777609	0.455656	0.63782	-6.63527	NonSig	1	Single-promoter
885	ENSG00000104142	VPS18	chr15	40894436	+	FALSE	1	FB-PB.1736.1	4.18893	4.18893	3.87063	3.87063	Major	Major	4.70536	4.11206	4.31056	3.49064	4.32605	4.02226	4.85989	3.07993	4.3377	3.05334	4.70536	4.11206	4.31056	3.49064	4.32605	4.02226	4.85989	3.07993	4.3377	3.05334	-0.318309	4.02978	-0.832389	0.425541	0.609606	-6.59008	NonSig	1	Single-promoter
886	ENSG00000104164	BLOC1S6	chr15	45587265	+	FALSE	1	FB-PB.1766.1,FB-PB.1766.2,FB-PB.1766.3,FB-PB.1766.4	5.86302	5.86302	6.16594	6.16594	Major	Major	6.26983	5.66776	5.57467	5.89169	5.91115	6.14382	5.96506	6.30898	6.22258	6.18924	6.26983	5.66776	5.57467	5.89169	5.91115	6.14382	5.96506	6.30898	6.22258	6.18924	0.302913	6.01448	2.02258	0.0720455	0.199205	-5.09573	NonSig	2	Multiple-promoter
887	ENSG00000104164	BLOC1S6	chr15	45587587	+	FALSE	2	FB-PB.1766.5	0	5.86302	0	6.16594	Inactive	Inactive	0	0	0	0	0	0	0	0	0	0	6.26983	5.66776	5.57467	5.89169	5.91115	6.14382	5.96506	6.30898	6.22258	6.18924	0	0	0	1	1	-6.95617	NonSig	2	Multiple-promoter
888	ENSG00000104205	SGK3	chr8	66712764	+	FALSE	1	FB-PB.4815.1	0.37687	0.37687	1.15955	1.15955	Major	Major	0	0	1.88435	0	0	2.09343	1.65846	0	0	2.04584	0	0	1.88435	0	0	2.09343	1.65846	0	0	2.04584	0.782676	0.768208	1.38482	0.197643	0.375698	-6.00028	NonSig	1	Single-promoter
889	ENSG00000104218	CSPP1	chr8	67064390	+	FALSE	1	FB-PB.4817.1	2.61306	2.61306	3.46853	3.46853	Major	Major	0.922984	3.11553	2.86414	2.8368	3.32583	4.20377	3.09572	3.20184	3.78798	3.05334	0.922984	3.11553	2.86414	2.8368	3.32583	4.20377	3.09572	3.20184	3.78798	3.05334	0.855474	3.04079	1.88038	0.0909019	0.230969	-5.31207	NonSig	1	Single-promoter
890	ENSG00000104228	TRIM35	chr8	27311312	-	FALSE	1	FB-PB.4757.1,FB-PB.4757.2,FB-PB.4757.3,FB-PB.4757.4,FB-PB.4757.5	4.93996	4.93996	4.2029	4.2029	Major	Major	5.65196	4.6415	4.70731	4.78793	4.91108	4.11587	3.90873	4.49963	3.78798	4.70228	5.65196	4.6415	4.70731	4.78793	4.91108	4.11587	3.90873	4.49963	3.78798	4.70228	-0.737058	4.57143	-2.98097	0.0144925	0.0711551	-3.53072	NonSig	1	Single-promoter
891	ENSG00000104312	RIPK2	chr8	89757793	+	FALSE	1	FB-PB.4841.1,FB-PB.4841.3	6.34962	6.34962	6.81978	6.81978	Major	Major	6.28649	6.82183	5.16969	7.0564	6.41368	6.6766	6.84938	7.11046	6.56931	6.89317	6.28649	6.82183	5.16969	7.0564	6.41368	6.6766	6.84938	7.11046	6.56931	6.89317	0.470167	6.5847	1.4588	0.176754	0.350821	-5.90543	NonSig	1	Single-promoter
892	ENSG00000104320	NBN	chr8	89984667	-	FALSE	1	FB-PB.4837.1,FB-PB.4837.2,FB-PB.4837.3	3.87298	3.87298	4.22849	4.22849	Major	Major	3.66089	3.26684	4.49409	4.03217	3.91094	4.20377	4.27298	4.34943	4.08887	4.22742	3.66089	3.26684	4.49409	4.03217	3.91094	4.20377	4.27298	4.34943	4.08887	4.22742	0.355507	4.05074	1.70098	0.121259	0.273198	-5.57444	NonSig	1	Single-promoter
893	ENSG00000104343	UBE2W	chr8	73878862	-	FALSE	1	FB-PB.4827.1,FB-PB.4827.2	3.35474	3.35474	3.72282	3.72282	Major	Major	3.75963	3.52883	1.48263	4.67679	3.32583	3.57192	3.42029	3.85003	3.25432	4.51753	3.75963	3.52883	1.48263	4.67679	3.32583	3.57192	3.42029	3.85003	3.25432	4.51753	0.368075	3.53878	0.699109	0.501177	0.674317	-6.69527	NonSig	1	Single-promoter
894	ENSG00000104356	POP1	chr8	98117316	+	FALSE	1	FB-PB.4859.1	0.184597	0.184597	1.71388	1.71388	Inactive	Major	0.922984	0	0	0	0	2.68841	1.65846	0.803701	1.04808	2.37077	0.922984	0	0	0	0	2.68841	1.65846	0.803701	1.04808	2.37077	1.52929	0.94924	3.98162	0.00284919	0.0246324	-1.87465	UpReg	1	Single-promoter
895	ENSG00000104361	NIPAL2	chr8	98294191	-	FALSE	1	FB-PB.4858.1	4.28862	4.28862	3.02494	3.02494	Major	Major	4.70536	4.33395	4.10024	4.49218	3.81138	2.91365	2.08243	3.07993	3.67191	3.37677	4.70536	4.33395	4.10024	4.49218	3.81138	2.91365	2.08243	3.07993	3.67191	3.37677	-1.26369	3.65678	-4.25161	0.00187491	0.0187008	-1.44323	DownReg	1	Single-promoter
896	ENSG00000104365	IKBKB	chr8	42271318	+	FALSE	1	FB-PB.4784.1,FB-PB.4784.2	2.99366	2.99366	2.30375	2.30375	Major	Major	2.6727	3.26684	2.86414	3.83923	2.3254	3.10843	1.65846	3.07993	3.67191	0	2.6727	3.26684	2.86414	3.83923	2.3254	3.10843	1.65846	3.07993	3.67191	0	-0.689912	2.6487	-1.04555	0.321543	0.513367	-6.38982	NonSig	1	Single-promoter
897	ENSG00000104368	PLAT	chr8	42207676	-	FALSE	1	FB-PB.4782.2,FB-PB.4782.1	4.3963	4.3963	4.02783	4.02783	Major	Major	5.23792	3.94257	3.4423	4.35453	5.0042	3.81459	4.19017	4.49963	3.40734	4.22742	5.23792	3.94257	3.4423	4.35453	5.0042	3.81459	4.19017	4.49963	3.40734	4.22742	-0.368471	4.21207	-1.02276	0.331663	0.523341	-6.413	NonSig	1	Single-promoter
898	ENSG00000104375	STK3	chr8	98825682	-	FALSE	1	FB-PB.4860.1	5.93307	5.93307	5.46406	5.46406	Major	Major	5.36882	6.22486	5.5193	6.31926	6.2331	5.44224	5.35406	5.44287	5.37765	5.70347	5.36882	6.22486	5.5193	6.31926	6.2331	5.44224	5.35406	5.44287	5.37765	5.70347	-0.46901	5.69856	-2.21238	0.0526089	0.162557	-4.79773	NonSig	1	Single-promoter
899	ENSG00000104388	RAB2A	chr8	60516939	+	FALSE	1	FB-PB.4807.1,FB-PB.4807.2,FB-PB.4807.4,FB-PB.4807.3	6.96641	6.96641	7.45908	7.45908	Major	Major	6.50149	7.12891	7.12083	6.91665	7.16418	7.11103	7.43016	7.87261	7.2437	7.63792	6.50149	7.12891	7.12083	6.91665	7.16418	7.11103	7.43016	7.87261	7.2437	7.63792	0.492673	7.21275	2.59535	0.0276819	0.108566	-4.17411	NonSig	1	Single-promoter
900	ENSG00000104408	EIF3E	chr8	108248719	-	FALSE	1	FB-PB.4883.1	9.30304	9.30304	9.19093	9.19093	Major	Major	8.91071	9.45049	9.18597	9.54798	9.42007	8.73399	9.17478	9.22809	9.14971	9.66806	8.91071	9.45049	9.18597	9.54798	9.42007	8.73399	9.17478	9.22809	9.14971	9.66806	-0.112118	9.24699	-0.582711	0.573606	0.733771	-6.77353	NonSig	1	Single-promoter
901	ENSG00000104419	NDRG1	chr8	133297256	-	FALSE	1	FB-PB.4909.1	8.23819	8.23819	7.95685	7.95685	Major	Major	8.09484	8.32686	7.53793	8.75531	8.476	7.95564	7.73772	7.46115	8.2028	8.42695	8.09484	8.32686	7.53793	8.75531	8.476	7.95564	7.73772	7.46115	8.2028	8.42695	-0.281337	8.09752	-1.08678	0.303835	0.496011	-6.34685	NonSig	1	Single-promoter
902	ENSG00000104427	ZC2HC1A	chr8	78666062	+	FALSE	1	FB-PB.4830.1,FB-PB.4830.2,FB-PB.4830.3	4.52136	4.52136	4.22232	4.22232	Major	Major	3.75963	4.74825	5.01815	4.03217	5.0486	4.36497	4.74855	3.69256	3.78798	4.51753	3.75963	4.74825	5.01815	4.03217	5.0486	4.36497	4.74855	3.69256	3.78798	4.51753	-0.299044	4.37184	-0.93685	0.371952	0.560719	-6.49666	NonSig	1	Single-promoter
903	ENSG00000104442	ARMC1	chr8	65634208	-	FALSE	1	FB-PB.4813.1,FB-PB.4813.2	4.28308	4.28308	4.66447	4.66447	Major	Major	4.37244	3.94257	4.60463	4.03217	4.46357	4.7033	5.01228	4.18175	4.41194	5.01308	4.37244	3.94257	4.60463	4.03217	4.46357	4.7033	5.01228	4.18175	4.41194	5.01308	0.381394	4.47377	1.8231	0.0997315	0.244955	-5.39723	NonSig	1	Single-promoter
904	ENSG00000104490	NCALD	chr8	102124261	-	FALSE	1	FB-PB.4870.1	1.10517	1.10517	2.90204	2.90204	Major	Major	0	0	0	3.20045	2.3254	3.57192	3.68509	1.9936	2.88882	2.37077	0	0	0	3.20045	2.3254	3.57192	3.68509	1.9936	2.88882	2.37077	1.79687	2.0036	2.54422	0.030168	0.11448	-4.25861	NonSig	1	Single-promoter
905	ENSG00000104517	UBR5	chr8	102412728	-	FALSE	1	FB-PB.4871.1	5.50924	5.50924	5.57227	5.57227	Major	Major	5.51733	5.87042	5.13327	5.89169	5.13349	5.70577	5.96506	5.44287	5.26198	5.48568	5.51733	5.87042	5.13327	5.89169	5.13349	5.70577	5.96506	5.44287	5.26198	5.48568	0.0630321	5.54076	0.303003	0.768393	0.872122	-6.90615	NonSig	1	Single-promoter
906	ENSG00000104549	SQLE	chr8	124998506	+	FALSE	1	FB-PB.4896.1	5.32082	5.32082	5.79669	5.79669	Major	Major	5.16773	6.53921	4.84879	4.61784	5.4305	5.58002	5.3916	5.83081	6.26326	5.91776	5.16773	6.53921	4.84879	4.61784	5.4305	5.58002	5.3916	5.83081	6.26326	5.91776	0.475873	5.55875	1.37368	0.200964	0.379094	-6.01428	NonSig	1	Single-promoter
907	ENSG00000104611	SH2D4A	chr8	19314000	+	FALSE	1	FB-PB.4732.1	0.895616	0.895616	1.16033	1.16033	Major	Major	0	0.969653	1.48263	2.0258	0	2.09343	2.08243	0	0	1.62578	0	0.969653	1.48263	2.0258	0	2.09343	2.08243	0	0	1.62578	0.264712	1.02797	0.455802	0.658734	0.80056	-6.84366	NonSig	1	Single-promoter
908	ENSG00000104626	ERI1	chr8	9002911	+	FALSE	1	FB-PB.4710.1	3.89577	3.89577	4.02016	4.02016	Major	Major	3.66089	3.75048	4.2438	3.73212	4.09154	4.28662	3.09572	4.67829	3.8954	4.14476	3.66089	3.75048	4.2438	3.73212	4.09154	4.28662	3.09572	4.67829	3.8954	4.14476	0.124392	3.95796	0.448733	0.663647	0.803266	-6.84709	NonSig	1	Single-promoter
909	ENSG00000104635	SLC39A14	chr8	22367278	+	FALSE	1	FB-PB.4736.1	5.24281	5.24281	6.06122	6.06122	Major	Major	4.80121	5.84659	3.66274	6.54172	5.36178	5.95409	5.98975	5.97459	6.02384	6.36383	4.80121	5.84659	3.66274	6.54172	5.36178	5.95409	5.98975	5.97459	6.02384	6.36383	0.818412	5.65201	1.77753	0.107315	0.255147	-5.46407	NonSig	1	Single-promoter
910	ENSG00000104643	MTMR9	chr8	11284819	+	FALSE	1	FB-PB.4717.1	3.87604	3.87604	4.42954	4.42954	Major	Major	3.85205	3.75048	3.4423	3.93892	4.39645	4.50995	4.56355	4.59173	4.3377	4.14476	3.85205	3.75048	3.4423	3.93892	4.39645	4.50995	4.56355	4.59173	4.3377	4.14476	0.553498	4.15279	3.02293	0.013512	0.067959	-3.46039	NonSig	1	Single-promoter
911	ENSG00000104689	TNFRSF10A	chr8	23225098	-	FALSE	1	FB-PB.4744.2,FB-PB.4744.1	2.24934	2.24934	3.05798	3.05798	Major	Major	2.19665	4.11206	0	2.34943	2.58858	3.28001	3.09572	3.20184	2.07153	3.6408	2.19665	4.11206	0	2.34943	2.58858	3.28001	3.09572	3.20184	2.07153	3.6408	0.808636	2.65366	1.23504	0.246375	0.431707	-6.182	NonSig	1	Single-promoter
912	ENSG00000104738	MCM4	chr8	47960938	+	FALSE	1	FB-PB.4788.1,FB-PB.4788.2,FB-PB.4788.3	1.64543	1.64543	3.45296	3.45296	Major	Major	1.88288	2.27306	1.48263	0	2.58858	3.43334	3.42029	2.94676	3.40734	4.05708	1.88288	2.27306	1.48263	0	2.58858	3.43334	3.42029	2.94676	3.40734	4.05708	1.80753	2.5492	3.99603	0.00278554	0.0243672	-1.8514	UpReg	1	Single-promoter
913	ENSG00000104756	KCTD9	chr8	25458426	-	FALSE	1	FB-PB.4750.2,FB-PB.4750.1,FB-PB.4750.3	5.07406	5.07406	5.11727	5.11727	Major	Major	5.36882	5.39951	4.80316	4.84044	4.95839	4.64169	5.10561	4.75996	5.97569	5.10339	5.36882	5.39951	4.80316	4.84044	4.95839	4.64169	5.10561	4.75996	5.97569	5.10339	0.043205	5.09567	0.166521	0.871224	0.93826	-6.94102	NonSig	1	Single-promoter
914	ENSG00000104765	BNIP3L	chr8	26383051	+	FALSE	1	FB-PB.4753.1,FB-PB.4753.2,FB-PB.4753.3	6.90431	6.90431	6.55086	6.55086	Major	Major	7.02269	6.66717	7.00467	6.96475	6.86228	6.33113	6.53394	6.47537	6.58544	6.82844	7.02269	6.66717	7.00467	6.96475	6.86228	6.33113	6.53394	6.47537	6.58544	6.82844	-0.353448	6.72759	-2.73536	0.0218752	0.0935667	-3.9415	NonSig	1	Single-promoter
915	ENSG00000104774	MAN2B1	chr19	12666736	-	FALSE	1	FB-PB.2468.1	5.14712	5.14712	4.97027	4.97027	Major	Major	5.43007	4.7988	5.40174	5.24283	4.86217	4.36497	5.49871	4.75996	5.58442	4.64328	5.43007	4.7988	5.40174	5.24283	4.86217	4.36497	5.49871	4.75996	5.58442	4.64328	-0.176853	5.05869	-0.660305	0.524684	0.694995	-6.7228	NonSig	1	Single-promoter
916	ENSG00000104812	GYS1	chr19	48993316	-	FALSE	1	FB-PB.2579.1	3.92423	3.92423	4.10228	4.10228	Major	Major	3.85205	3.75048	4.43547	4.11976	3.46337	4.50995	3.90873	4.40125	4.17667	3.51481	3.85205	3.75048	4.43547	4.11976	3.46337	4.50995	3.90873	4.40125	4.17667	3.51481	0.178058	4.01326	0.742566	0.475636	0.653796	-6.66275	NonSig	1	Single-promoter
917	ENSG00000104825	NFKBIB	chr19	38900001	+	FALSE	1	FB-PB.2537.1	3.57964	3.57964	3.99313	3.99313	Major	Major	3.18019	3.94257	3.66274	3.93892	3.17378	3.92216	4.10232	3.77344	3.78798	4.37975	3.18019	3.94257	3.66274	3.93892	3.17378	3.92216	4.10232	3.77344	3.78798	4.37975	0.41349	3.78639	1.99076	0.075912	0.207408	-5.1447	NonSig	1	Single-promoter
918	ENSG00000104853	CLPTM1	chr19	44955381	+	FALSE	1	FB-PB.2558.1	5.16909	5.16909	4.55789	4.55789	Major	Major	4.84684	4.74825	5.5193	5.20328	5.5278	4.76239	4.80529	4.94593	4.41194	3.8639	4.84684	4.74825	5.5193	5.20328	5.5278	4.76239	4.80529	4.94593	4.41194	3.8639	-0.611202	4.86349	-2.46169	0.0346568	0.123666	-4.39432	NonSig	1	Single-promoter
919	ENSG00000104866	PPP1R37	chr19	45093147	+	FALSE	1	FB-PB.2561.2	4.14433	4.14433	3.93998	3.93998	Major	Major	5.16773	3.94257	3.7615	3.93892	3.91094	4.76239	4.00877	3.41852	3.99538	3.51481	5.16773	3.94257	3.7615	3.93892	3.91094	4.76239	4.00877	3.41852	3.99538	3.51481	-0.204356	4.04215	-0.613212	0.554077	0.720457	-6.75428	NonSig	1	Single-promoter
920	ENSG00000104936	DMPK	chr19	45782490	-	FALSE	1	FB-PB.2563.1	4.70337	4.70337	3.9581	3.9581	Major	Major	4.84684	5.39951	3.94079	5.07766	4.25204	3.57192	3.09572	3.60687	5.13622	4.37975	4.84684	5.39951	3.94079	5.07766	4.25204	3.57192	3.09572	3.60687	5.13622	4.37975	-0.745271	4.33073	-1.77732	0.107351	0.255147	-5.46437	NonSig	1	Single-promoter
921	ENSG00000104998	IL27RA	chr19	14031777	+	FALSE	1	FB-PB.2473.1,FB-PB.2473.2	1.31377	1.31377	0.582946	0.582946	Major	Major	0.922984	1.95424	2.6744	1.01725	0	1.06295	0	0.803701	1.04808	0	0.922984	1.95424	2.6744	1.01725	0	1.06295	0	0.803701	1.04808	0	-0.730828	0.94836	-1.51027	0.163372	0.332515	-5.8376	NonSig	1	Single-promoter
922	ENSG00000105137	SYDE1	chr19	15107368	+	FALSE	1	FB-PB.2476.1,FB-PB.2476.2	3.71582	3.71582	3.70708	3.70708	Major	Major	2.45422	3.11553	4.80316	4.03217	4.17402	3.69835	3.68509	3.51577	4.25943	3.37677	2.45422	3.11553	4.80316	4.03217	4.17402	3.69835	3.68509	3.51577	4.25943	3.37677	-0.00873814	3.71145	-0.0211352	0.983573	1	-6.95593	NonSig	1	Single-promoter
923	ENSG00000105186	ANKRD27	chr19	32675180	-	FALSE	1	FB-PB.2513.1,FB-PB.2513.2	3.93431	3.93431	3.00197	3.00197	Major	Major	4.1719	3.52883	3.4423	4.35453	4.17402	3.28001	4.19017	3.51577	2.3981	1.62578	4.1719	3.52883	3.4423	4.35453	4.17402	3.28001	4.19017	3.51577	2.3981	1.62578	-0.93235	3.46814	-2.05907	0.0678412	0.19095	-5.03919	NonSig	1	Single-promoter
924	ENSG00000105221	AKT2	chr19	40285361	-	FALSE	1	FB-PB.2541.1,FB-PB.2541.2	4.44662	4.44662	4.29919	4.29919	Major	Major	3.03003	4.26371	4.93595	5.35537	4.64802	4.02226	4.27298	4.18175	4.79152	4.22742	3.03003	4.26371	4.93595	5.35537	4.64802	4.02226	4.27298	4.18175	4.79152	4.22742	-0.147432	4.3729	-0.376062	0.7151	0.837957	-6.87932	NonSig	1	Single-promoter
925	ENSG00000105229	PIAS4	chr19	4007740	+	FALSE	1	FB-PB.2428.1	2.44914	2.44914	3.10721	3.10721	Major	Major	1.48133	1.54436	2.86414	3.03005	3.32583	3.69835	2.90118	2.80004	3.08311	3.05334	1.48133	1.54436	2.86414	3.03005	3.32583	3.69835	2.90118	2.80004	3.08311	3.05334	0.658064	2.77817	1.66979	0.127396	0.28023	-5.61866	NonSig	1	Single-promoter
926	ENSG00000105270	CLIP3	chr19	36032864	-	FALSE	1	FB-PB.2523.1	5.98077	5.98077	4.67572	4.67572	Major	Major	6.33533	5.79772	6.54567	5.49296	5.73217	4.97717	4.62789	4.59173	6.3222	2.85963	6.33533	5.79772	6.54567	5.49296	5.73217	4.97717	4.62789	4.59173	6.3222	2.85963	-1.30505	5.32825	-2.39707	0.0386285	0.132412	-4.49993	NonSig	1	Single-promoter
927	ENSG00000105281	SLC1A5	chr19	46788594	-	FALSE	1	FB-PB.2566.1	6.22006	6.22006	6.09759	6.09759	Major	Major	6.14752	6.41509	5.95456	6.40893	6.1742	6.25087	5.83483	5.99159	6.26326	6.14739	6.14752	6.41509	5.95456	6.40893	6.1742	6.25087	5.83483	5.99159	6.26326	6.14739	-0.122472	6.15882	-0.876892	0.402094	0.589103	-6.55143	NonSig	1	Single-promoter
928	ENSG00000105323	HNRNPUL1	chr19	41262546	+	FALSE	1	FB-PB.2546.1	1.8374	34.2174	1.87633	32.2277	Minor	Minor	0	2.27306	1.88435	2.0258	3.00379	2.09343	2.67627	2.24119	0	2.37077	33.6236	33.2116	34.9549	35.3002	33.9966	30.0272	33.7	33.9238	31.0714	32.4159	0.038931	1.85687	0.0609449	0.952661	0.989011	-6.95414	NonSig	6	Multiple-promoter
929	ENSG00000105323	HNRNPUL1	chr19	41264422	+	FALSE	2	FB-PB.2546.2,FB-PB.2546.3,FB-PB.2546.4,FB-PB.2546.5,FB-PB.2546.6	6.91619	34.2174	6.28337	32.2277	Minor	Minor	7.14646	6.56864	7.26246	6.69217	6.91119	6.12142	6.33631	6.6136	6.26326	6.08226	33.6236	33.2116	34.9549	35.3002	33.9966	30.0272	33.7	33.9238	31.0714	32.4159	-0.632817	6.59978	-3.68616	0.00455374	0.0330399	-2.35607	NonSig	6	Multiple-promoter
930	ENSG00000105323	HNRNPUL1	chr19	41265086	+	FALSE	3	FB-PB.2546.8	2.86806	34.2174	2.11457	32.2277	Minor	Minor	3.18019	1.95424	2.45587	3.93892	2.81107	0	2.90118	2.63669	2.66422	2.37077	33.6236	33.2116	34.9549	35.3002	33.9966	30.0272	33.7	33.9238	31.0714	32.4159	-0.753486	2.49132	-1.28776	0.228198	0.413734	-6.11969	NonSig	6	Multiple-promoter
931	ENSG00000105323	HNRNPUL1	chr19	41292244	+	TRUE	4	FB-PB.2546.9	7.15556	34.2174	6.55959	32.2277	NA	NA	7.61057	7.08884	7.58588	7.04526	6.44723	6.36964	6.73719	6.80852	6.63278	6.24981	33.6236	33.2116	34.9549	35.3002	33.9966	30.0272	33.7	33.9238	31.0714	32.4159	-0.595969	6.85757	-2.53164	0.0308128	0.115464	-4.27935	NonSig	6	Multiple-promoter
932	ENSG00000105323	HNRNPUL1	chr19	41294359	+	TRUE	5	FB-PB.2546.10	7.7779	34.2174	7.65546	32.2277	NA	NA	8.0758	7.67366	8.00912	7.79569	7.33523	7.6618	7.45698	7.73297	7.78765	7.63792	33.6236	33.2116	34.9549	35.3002	33.9966	30.0272	33.7	33.9238	31.0714	32.4159	-0.122438	7.71668	-0.776756	0.456135	0.638036	-6.63595	NonSig	6	Multiple-promoter
933	ENSG00000105323	HNRNPUL1	chr19	41294609	+	TRUE	6	FB-PB.2546.11	7.66229	34.2174	7.73835	32.2277	NA	NA	7.61057	7.6532	7.75722	7.80232	7.48813	7.7809	7.59212	7.89085	7.7235	7.70436	33.6236	33.2116	34.9549	35.3002	33.9966	30.0272	33.7	33.9238	31.0714	32.4159	0.076058	7.70032	0.690395	0.506399	0.678779	-6.70157	NonSig	6	Multiple-promoter
934	ENSG00000105325	FZR1	chr19	3506319	+	FALSE	1	FB-PB.2426.1	3.65541	3.65541	4.14735	4.14735	Major	Major	3.75963	3.40377	4.10024	4.20234	2.81107	4.28662	4.91249	3.69256	3.78798	4.05708	3.75963	3.40377	4.10024	4.20234	2.81107	4.28662	4.91249	3.69256	3.78798	4.05708	0.491937	3.90138	1.54639	0.15452	0.319814	-5.78916	NonSig	1	Single-promoter
935	ENSG00000105355	PLIN3	chr19	4867667	-	FALSE	1	FB-PB.2434.1,FB-PB.2434.2	6.28109	6.28109	7.14679	7.14679	Major	Major	5.30485	6.70741	6.03573	7.22389	6.13356	7.36089	7.03877	7.23707	6.80798	7.28923	5.30485	6.70741	6.03573	7.22389	6.13356	7.36089	7.03877	7.23707	6.80798	7.28923	0.865699	6.71394	2.68088	0.0239732	0.0993937	-4.0322	NonSig	1	Single-promoter
936	ENSG00000105397	TYK2	chr19	10380539	-	FALSE	1	FB-PB.2453.1	3.95882	3.95882	4.3831	4.3831	Major	Major	2.45422	3.84972	4.02271	4.55638	4.91108	4.87378	3.68509	4.87439	4.17667	4.30559	2.45422	3.84972	4.02271	4.55638	4.91108	4.87378	3.68509	4.87439	4.17667	4.30559	0.424281	4.17096	0.951425	0.364877	0.554104	-6.48289	NonSig	1	Single-promoter
937	ENSG00000105402	NAPA	chr19	47515051	-	FALSE	1	FB-PB.2570.1	6.26519	6.26519	6.44023	6.44023	Major	Major	5.30485	6.78469	6.28848	6.60379	6.34413	6.209	6.33631	6.68851	6.3222	6.64515	5.30485	6.78469	6.28848	6.60379	6.34413	6.209	6.33631	6.68851	6.3222	6.64515	0.175042	6.35271	0.660367	0.524646	0.694995	-6.72276	NonSig	1	Single-promoter
938	ENSG00000105486	LIG1	chr19	48170343	-	FALSE	1	FB-PB.2573.1	2.10716	2.10716	5.24123	5.24123	Major	Major	3.18019	4.0298	0	0	3.32583	5.64426	4.96325	5.047	4.79152	5.7601	3.18019	4.0298	0	0	3.32583	5.64426	4.96325	5.047	4.79152	5.7601	3.13406	3.6742	3.80896	0.00374241	0.0288637	-2.15491	UpReg	1	Single-promoter
939	ENSG00000105514	RAB3D	chr19	11339647	-	FALSE	1	FB-PB.2465.1,FB-PB.2465.2	4.73084	4.73084	3.53643	3.53643	Major	Major	5.59961	5.33246	4.10024	4.61784	4.00406	3.69835	4.00877	3.07993	3.25432	3.6408	5.59961	5.33246	4.10024	4.61784	4.00406	3.69835	4.00877	3.07993	3.25432	3.6408	-1.19441	4.13364	-3.4958	0.0061945	0.0401158	-2.67051	DownReg	1	Single-promoter
940	ENSG00000105559	PLEKHA4	chr19	48868662	-	FALSE	1	FB-PB.2575.2,FB-PB.2575.1,FB-PB.2575.3,FB-PB.2575.4	3.84489	3.84489	2.76734	2.76734	Major	Major	4.49216	4.0298	3.7615	3.03005	3.91094	2.09343	2.67627	2.80004	3.40734	2.85963	4.49216	4.0298	3.7615	3.03005	3.91094	2.09343	2.67627	2.80004	3.40734	2.85963	-1.07755	3.30612	-3.55552	0.00562198	0.037782	-2.57155	DownReg	1	Single-promoter
941	ENSG00000105612	DNASE2	chr19	12881480	-	FALSE	1	FB-PB.2475.1	4.80254	4.80254	3.90532	3.90532	Major	Major	5.59961	3.84972	5.09591	4.55638	4.91108	3.92216	4.00877	3.992	4.08887	3.51481	5.59961	3.84972	5.09591	4.55638	4.91108	3.92216	4.00877	3.992	4.08887	3.51481	-0.897217	4.35393	-3.03322	0.0132821	0.0672223	-3.44314	NonSig	1	Single-promoter
942	ENSG00000105647	PIK3R2	chr19	18153163	+	FALSE	1	FB-PB.2491.1	4.13512	4.13512	4.3061	4.3061	Major	Major	3.9389	3.52883	4.84879	5.03323	3.32583	4.43928	4.10232	4.34943	4.67574	3.96372	3.9389	3.52883	4.84879	5.03323	3.32583	4.43928	4.10232	4.34943	4.67574	3.96372	0.170981	4.22061	0.492662	0.633395	0.783842	-6.82496	NonSig	1	Single-promoter
943	ENSG00000105656	ELL	chr19	18522069	-	FALSE	1	FB-PB.2494.1	6.04273	6.04273	5.79977	5.79977	Major	Major	5.27178	6.34878	5.60158	6.72047	6.27107	6.1876	5.19327	5.90449	5.92589	5.7876	5.27178	6.34878	5.60158	6.72047	6.27107	6.1876	5.19327	5.90449	5.92589	5.7876	-0.242967	5.92125	-0.814963	0.434972	0.618853	-6.60475	NonSig	1	Single-promoter
944	ENSG00000105708	ZNF14	chr19	19733109	-	FALSE	1	FB-PB.2499.1	2.07029	2.07029	1.53134	1.53134	Major	Major	2.45422	3.11553	0	1.60792	3.17378	1.6683	2.08243	0.803701	2.07153	1.03072	2.45422	3.11553	0	1.60792	3.17378	1.6683	2.08243	0.803701	2.07153	1.03072	-0.538952	1.80081	-0.900972	0.389788	0.577556	-6.5298	NonSig	1	Single-promoter
945	ENSG00000105726	ATP13A1	chr19	19663685	-	FALSE	1	FB-PB.2498.1,FB-PB.2498.2	4.19259	4.19259	4.84754	4.84754	Major	Major	3.9389	4.52623	3.7615	3.73212	5.0042	4.97717	4.80529	5.23009	4.25943	4.96571	3.9389	4.52623	3.7615	3.73212	5.0042	4.97717	4.80529	5.23009	4.25943	4.96571	0.654949	4.52006	2.29793	0.0456069	0.147798	-4.6606	NonSig	1	Single-promoter
946	ENSG00000105732	ZNF574	chr19	42076160	+	FALSE	1	FB-PB.2550.1	4.07739	4.07739	3.63587	3.63587	Major	Major	4.37244	4.33395	3.55673	4.11976	4.00406	2.68841	3.68509	4.29567	3.99538	3.51481	4.37244	4.33395	3.55673	4.11976	4.00406	2.68841	3.68509	4.29567	3.99538	3.51481	-0.44152	3.85663	-1.49115	0.168236	0.339243	-5.86297	NonSig	1	Single-promoter
947	ENSG00000105778	AVL9	chr7	32495521	+	FALSE	1	FB-PB.4487.1	3.96658	3.96658	4.28583	4.28583	Major	Major	5.05559	3.84972	4.02271	3.20045	3.70444	4.81916	3.42029	4.05806	4.54987	4.58177	5.05559	3.84972	4.02271	3.20045	3.70444	4.81916	3.42029	4.05806	4.54987	4.58177	0.319248	4.12621	0.860599	0.410572	0.596669	-6.56578	NonSig	1	Single-promoter
948	ENSG00000105793	GTPBP10	chr7	90346687	+	FALSE	1	FB-PB.4564.1	3.30695	3.30695	3.35828	3.35828	Major	Major	3.18019	3.26684	3.66274	2.6136	3.81138	3.57192	2.67627	3.77344	3.54569	3.2241	3.18019	3.26684	3.66274	2.6136	3.81138	3.57192	2.67627	3.77344	3.54569	3.2241	0.051332	3.33262	0.187054	0.855537	0.930593	-6.93705	NonSig	1	Single-promoter
949	ENSG00000105810	CDK6	chr7	92836573	-	FALSE	1	FB-PB.4572.1	4.7054	4.7054	5.12315	5.12315	Major	Major	4.70536	5.11032	3.94079	5.24283	4.52771	5.32953	5.19327	5.17161	4.61418	5.30716	4.70536	5.11032	3.94079	5.24283	4.52771	5.32953	5.19327	5.17161	4.61418	5.30716	0.417746	4.91428	1.61686	0.138459	0.295792	-5.6927	NonSig	1	Single-promoter
950	ENSG00000105835	NAMPT	chr7	106285146	-	FALSE	1	FB-PB.4608.1,FB-PB.4608.2,FB-PB.4608.3	10.3823	10.3823	10.6519	10.6519	Major	Major	9.86415	10.686	9.43631	11.3415	10.5836	10.629	10.6383	10.7541	10.7056	10.5324	9.86415	10.686	9.43631	11.3415	10.5836	10.629	10.6383	10.7541	10.7056	10.5324	0.269535	10.5171	0.845273	0.418659	0.603498	-6.57907	NonSig	1	Single-promoter
951	ENSG00000105849	POLR1F	chr7	19709042	-	FALSE	1	FB-PB.4458.1,FB-PB.4458.2	4.47252	4.47252	4.74905	4.74905	Major	Major	4.1719	4.26371	4.80316	4.03217	5.09167	4.36497	5.10561	5.20114	4.84609	4.22742	4.1719	4.26371	4.80316	4.03217	5.09167	4.36497	5.10561	5.20114	4.84609	4.22742	0.276524	4.61078	1.01751	0.334027	0.5258	-6.41828	NonSig	1	Single-promoter
952	ENSG00000105879	CBLL1	chr7	107744146	+	FALSE	1	FB-PB.4611.1	4.58865	4.58865	4.60579	4.60579	Major	Major	4.43354	5.22566	4.75603	3.93892	4.58912	4.9264	4.68948	4.87439	3.8954	4.64328	4.43354	5.22566	4.75603	3.93892	4.58912	4.9264	4.68948	4.87439	3.8954	4.64328	0.0171362	4.59722	0.0632912	0.950841	0.988089	-6.95398	NonSig	1	Single-promoter
953	ENSG00000105887	MTPN	chr7	135977360	-	FALSE	1	FB-PB.4671.2,FB-PB.4671.1	7.31585	7.31585	7.37	7.37	Major	Major	7.22633	7.59002	7.2022	7.34696	7.21376	7.32214	7.31763	7.5384	7.25383	7.41799	7.22633	7.59002	7.2022	7.34696	7.21376	7.32214	7.31763	7.5384	7.25383	7.41799	0.054146	7.34293	0.45577	0.658756	0.80056	-6.84367	NonSig	1	Single-promoter
954	ENSG00000105889	STEAP1B	chr7	22500240	-	FALSE	1	FB-PB.4461.1	0.200434	0.200434	0.422206	0.422206	Inactive	Major	0	0	0	0	1.00217	1.06295	0	0	1.04808	0	0	0	0	0	1.00217	1.06295	0	0	1.04808	0	0.221772	0.31132	0.7109	0.494165	0.668678	-6.68662	NonSig	1	Single-promoter
955	ENSG00000105939	ZC3HAV1	chr7	139109370	-	FALSE	1	FB-PB.4674.1	6.0737	6.0737	5.26314	5.26314	Major	Major	5.62602	6.24323	5.89054	6.33765	6.27107	4.87378	5.19327	5.84959	5.34012	5.05894	5.62602	6.24323	5.89054	6.33765	6.27107	4.87378	5.19327	5.84959	5.34012	5.05894	-0.810562	5.66842	-3.7751	0.00394971	0.0299729	-2.21023	NonSig	1	Single-promoter
956	ENSG00000105953	OGDH	chr7	44606569	+	FALSE	1	FB-PB.4517.1,FB-PB.4517.2	3.62014	9.32305	3.71031	9.35604	Minor	Minor	3.18019	4.0298	3.18199	4.11976	3.58894	3.69835	3.80124	3.51577	3.8954	3.6408	9.43318	10.1191	8.45573	9.10716	9.50009	9.40413	9.11675	9.49036	9.23552	9.53344	0.090175	3.66522	0.425844	0.679671	0.812867	-6.85783	NonSig	2	Multiple-promoter
957	ENSG00000105953	OGDH	chr7	44696523	+	TRUE	2	FB-PB.4517.3	5.70291	9.32305	5.64573	9.35604	NA	NA	6.25298	6.08928	5.27374	4.9874	5.91115	5.70577	5.31551	5.97459	5.34012	5.89265	9.43318	10.1191	8.45573	9.10716	9.50009	9.40413	9.11675	9.49036	9.23552	9.53344	-0.0571852	5.67432	-0.211297	0.837102	0.919474	-6.93179	NonSig	2	Multiple-promoter
958	ENSG00000105971	CAV2	chr7	116499738	+	FALSE	1	FB-PB.4624.2,FB-PB.4624.3	6.07069	6.07069	6.21099	6.21099	Major	Major	6.84293	6.29697	5.84622	5.07766	6.28968	6.09868	6.31693	6.07374	6.2018	6.36383	6.84293	6.29697	5.84622	5.07766	6.28968	6.09868	6.31693	6.07374	6.2018	6.36383	0.1403	6.14084	0.487112	0.63718	0.786785	-6.82787	NonSig	1	Single-promoter
959	ENSG00000105974	CAV1	chr7	116525010	+	FALSE	1	FB-PB.4626.1	6.7523	21.6087	6.23385	20.0539	Minor	Minor	6.44326	6.85804	7.15756	6.39143	6.91119	5.24918	6.31693	6.7892	6.37883	6.43513	21.1991	21.7678	21.8031	21.4635	21.8099	18.5777	19.8484	21.0717	20.6666	20.1052	-0.518445	6.49307	-1.81163	0.101592	0.247383	-5.41413	NonSig	3	Multiple-promoter
960	ENSG00000105974	CAV1	chr7	116525099	+	FALSE	2	FB-PB.4626.2	5.33411	21.6087	4.49672	20.0539	Minor	Minor	5.30485	5.4319	4.80316	5.73408	5.39655	4.28662	4.27298	4.7197	4.89868	4.30559	21.1991	21.7678	21.8031	21.4635	21.8099	18.5777	19.8484	21.0717	20.6666	20.1052	-0.837393	4.91541	-4.1345	0.00224533	0.0210459	-1.62928	NonSig	3	Multiple-promoter
961	ENSG00000105974	CAV1	chr7	116526362	+	TRUE	3	FB-PB.4626.5,FB-PB.4626.4,FB-PB.4626.6,FB-PB.4626.3	9.5223	21.6087	9.32333	20.0539	NA	NA	9.45102	9.4779	9.84239	9.33802	9.50218	9.04189	9.25845	9.56275	9.38908	9.36449	21.1991	21.7678	21.8031	21.4635	21.8099	18.5777	19.8484	21.0717	20.6666	20.1052	-0.19897	9.42282	-1.41645	0.188466	0.363212	-5.96011	NonSig	3	Multiple-promoter
962	ENSG00000105983	LMBR1	chr7	156893173	-	FALSE	1	FB-PB.4699.1	4.18501	4.18501	3.67621	3.67621	Major	Major	4.54849	3.52883	3.94079	4.20234	4.70461	4.02226	3.80124	3.77344	3.40734	3.37677	4.54849	3.52883	3.94079	4.20234	4.70461	4.02226	3.80124	3.77344	3.40734	3.37677	-0.508798	3.93061	-2.11546	0.0618019	0.181047	-4.95109	NonSig	1	Single-promoter
963	ENSG00000105993	DNAJB6	chr7	157337017	+	FALSE	1	FB-PB.4700.1	6.86631	6.86631	7.08408	7.08408	Major	Major	6.77373	7.10901	6.33733	6.98822	7.12325	7.13358	7.1193	7.16395	7.00073	7.00283	6.77373	7.10901	6.33733	6.98822	7.12325	7.13358	7.1193	7.16395	7.00073	7.00283	0.217772	6.97519	1.33798	0.211928	0.393336	-6.05864	NonSig	1	Single-promoter
964	ENSG00000106009	BRAT1	chr7	2555524	-	FALSE	1	FB-PB.4432.1	2.58778	2.58778	2.778	2.778	Major	Major	2.6727	2.75493	2.6744	2.0258	2.81107	4.11587	2.40969	3.07993	1.64871	2.63581	2.6727	2.75493	2.6744	2.0258	2.81107	4.11587	2.40969	3.07993	1.64871	2.63581	0.190223	2.68289	0.470313	0.648701	0.794006	-6.83646	NonSig	1	Single-promoter
965	ENSG00000106034	CPED1	chr7	120988716	+	TRUE	1	FB-PB.4636.1,FB-PB.4636.2,FB-PB.4636.4,FB-PB.4636.5	6.99385	6.99385	5.60522	5.60522	NA	NA	6.6245	7.07865	7.23694	7.24352	6.78566	5.40564	5.80731	5.58409	5.99997	5.22907	6.6245	7.07865	7.23694	7.24352	6.78566	5.40564	5.80731	5.58409	5.99997	5.22907	-1.38864	6.29954	-7.28362	3.41927e-05	0.00153667	2.70154	DownReg	1	Single-promoter
966	ENSG00000106052	TAX1BP1	chr7	27740119	+	FALSE	1	FB-PB.4479.1,FB-PB.4479.2,FB-PB.4479.3,FB-PB.4479.4,FB-PB.4479.5	6.36038	6.36038	6.07266	6.07266	Major	Major	6.21868	5.96199	6.39999	6.67781	6.54345	6.05207	5.77926	6.29535	6.22258	6.01404	6.21868	5.96199	6.39999	6.67781	6.54345	6.05207	5.77926	6.29535	6.22258	6.01404	-0.287723	6.21652	-1.73397	0.115058	0.26502	-5.52718	NonSig	1	Single-promoter
967	ENSG00000106080	FKBP14	chr7	30026684	-	FALSE	1	FB-PB.4488.1,FB-PB.4488.3	4.95681	4.95681	5.73383	5.73383	Major	Major	3.75963	4.7988	4.49409	6.20375	5.5278	5.58002	5.66125	6.1665	5.64724	5.61413	3.75963	4.7988	4.49409	6.20375	5.5278	5.58002	5.66125	6.1665	5.64724	5.61413	0.777013	5.34532	1.90396	0.087484	0.226101	-5.27667	NonSig	1	Single-promoter
968	ENSG00000106144	CASP2	chr7	143288394	+	FALSE	1	FB-PB.4683.1,FB-PB.4683.2	2.51895	2.51895	2.66518	2.66518	Major	Major	3.85205	0	3.31801	2.6136	2.81107	3.10843	2.67627	2.24119	2.66422	2.63581	3.85205	0	3.31801	2.6136	2.81107	3.10843	2.67627	2.24119	2.66422	2.63581	0.146237	2.59206	0.232752	0.820872	0.908209	-6.9266	NonSig	1	Single-promoter
969	ENSG00000106244	PDAP1	chr7	99408592	-	FALSE	1	FB-PB.4585.1	5.56132	5.56132	6.51069	6.51069	Major	Major	5.7751	4.74825	5.97528	5.28133	6.02664	6.44372	6.29728	6.52293	6.58544	6.70406	5.7751	4.74825	5.97528	5.28133	6.02664	6.44372	6.29728	6.52293	6.58544	6.70406	0.949368	6.036	3.85496	0.00347886	0.0278167	-2.07994	NonSig	1	Single-promoter
970	ENSG00000106246	PTCD1	chr7	99438785	-	FALSE	1	FB-PB.4586.1	0.939305	0.939305	1.13274	1.13274	Major	Major	2.19665	0	1.48263	1.01725	0	2.68841	1.65846	1.31681	0	0	2.19665	0	1.48263	1.01725	0	2.68841	1.65846	1.31681	0	0	0.193431	1.03602	0.312702	0.761237	0.867528	-6.90291	NonSig	1	Single-promoter
971	ENSG00000106261	ZKSCAN1	chr7	100015598	+	FALSE	1	FB-PB.4593.1	5.71617	5.71617	5.24128	5.24128	Major	Major	6.28649	5.46358	6.01586	5.31883	5.49609	5.6125	5.2759	4.29567	5.79328	5.22907	6.28649	5.46358	6.01586	5.31883	5.49609	5.6125	5.2759	4.29567	5.79328	5.22907	-0.474884	5.47873	-1.56226	0.150765	0.313941	-5.76765	NonSig	1	Single-promoter
972	ENSG00000106346	USP42	chr7	6104915	+	FALSE	1	FB-PB.4439.1,FB-PB.4439.2	2.19093	2.19093	1.6498	1.6498	Major	Major	2.19665	2.27306	2.45587	2.0258	2.00325	1.6683	2.08243	2.45245	0	2.04584	2.19665	2.27306	2.45587	2.0258	2.00325	1.6683	2.08243	2.45245	0	2.04584	-0.541122	1.92036	-1.31624	0.218849	0.401428	-6.08527	NonSig	1	Single-promoter
973	ENSG00000106392	C1GALT1	chr7	7182565	+	FALSE	1	FB-PB.4445.1,FB-PB.4445.2	2.79393	2.79393	3.62882	3.62882	Major	Major	3.03003	1.95424	4.31056	2.34943	2.3254	3.57192	3.68509	3.992	3.25432	3.6408	3.03003	1.95424	4.31056	2.34943	2.3254	3.57192	3.68509	3.992	3.25432	3.6408	0.834893	3.21138	2.05469	0.0683325	0.191781	-5.04599	NonSig	1	Single-promoter
974	ENSG00000106443	PHF14	chr7	10973841	+	FALSE	1	FB-PB.4448.1	5.00299	5.00299	5.21818	5.21818	Major	Major	5.7271	4.84763	5.91219	3.93892	4.58912	5.47794	5.49871	5.2863	5.37765	4.45028	5.7271	4.84763	5.91219	3.93892	4.58912	5.47794	5.49871	5.2863	5.37765	4.45028	0.215183	5.11059	0.551912	0.593704	0.749417	-6.79203	NonSig	1	Single-promoter
975	ENSG00000106460	TMEM106B	chr7	12211327	+	FALSE	1	FB-PB.4449.1	5.54522	5.54522	5.06947	5.06947	Major	Major	5.70249	5.11032	5.67943	5.70606	5.5278	5.20726	5.93994	4.54641	5.13622	4.51753	5.70249	5.11032	5.67943	5.70606	5.5278	5.20726	5.93994	4.54641	5.13622	4.51753	-0.475748	5.30734	-1.7328	0.115273	0.265202	-5.52886	NonSig	1	Single-promoter
976	ENSG00000106477	CEP41	chr7	130441044	-	FALSE	1	FB-PB.4649.2,FB-PB.4649.1	1.91933	1.91933	2.37758	2.37758	Major	Major	0.922984	0.969653	2.6744	2.0258	3.00379	2.09343	2.08243	2.45245	2.88882	2.37077	0.922984	0.969653	2.6744	2.0258	3.00379	2.09343	2.08243	2.45245	2.88882	2.37077	0.458254	2.14845	1.08326	0.305319	0.497191	-6.35058	NonSig	1	Single-promoter
977	ENSG00000106554	CHCHD3	chr7	133082081	-	FALSE	1	FB-PB.4663.1	4.69999	4.69999	5.54798	5.54798	Major	Major	4.75408	5.02796	4.2438	5.07766	4.39645	5.64426	5.10561	5.53854	5.58442	5.8671	4.75408	5.02796	4.2438	5.07766	4.39645	5.64426	5.10561	5.53854	5.58442	5.8671	0.847994	5.12399	4.05751	0.00253049	0.0228972	-1.75251	NonSig	1	Single-promoter
978	ENSG00000106608	URGCP	chr7	43906625	-	FALSE	1	FB-PB.4507.1,FB-PB.4507.2	2.68006	2.68006	2.42867	2.42867	Major	Major	0.922984	3.11553	2.45587	3.73212	3.17378	0	3.26711	2.45245	3.78798	2.63581	0.922984	3.11553	2.45587	3.73212	3.17378	0	3.26711	2.45245	3.78798	2.63581	-0.251386	2.55436	-0.33595	0.744182	0.855547	-6.89475	NonSig	1	Single-promoter
979	ENSG00000106609	TMEM248	chr7	66921242	+	FALSE	1	FB-PB.4535.1	0.721165	0.721165	0.832991	0.832991	Major	Major	0	0	0	1.01725	2.58858	2.09343	0	0	2.07153	0	0	0	0	1.01725	2.58858	2.09343	0	0	2.07153	0	0.111826	0.777078	0.168356	0.86982	0.937281	-6.94068	NonSig	1	Single-promoter
980	ENSG00000106624	AEBP1	chr7	44104351	+	FALSE	1	FB-PB.4511.1	8.99794	8.99794	8.01697	8.01697	Major	Major	9.26183	8.7397	9.12468	8.79577	9.06772	7.91716	8.24294	7.93986	8.46501	7.5199	9.26183	8.7397	9.12468	8.79577	9.06772	7.91716	8.24294	7.93986	8.46501	7.5199	-0.980964	8.50746	-5.06949	0.000561992	0.00911702	-0.195511	NonSig	1	Single-promoter
981	ENSG00000106638	TBL2	chr7	73578579	-	FALSE	1	FB-PB.4539.1	2.58092	2.58092	3.68188	3.68188	Major	Major	3.03003	3.26684	2.6744	1.60792	2.3254	3.57192	3.68509	3.85003	3.54569	3.75666	3.03003	3.26684	2.6744	1.60792	2.3254	3.57192	3.68509	3.85003	3.54569	3.75666	1.10096	3.1314	3.86236	0.00343831	0.0276618	-2.06789	UpReg	1	Single-promoter
982	ENSG00000106723	SPIN1	chr9	88388404	+	FALSE	1	FB-PB.5016.1,FB-PB.5016.2,FB-PB.5016.3,FB-PB.5016.4	4.69477	4.69477	4.03544	4.03544	Major	Major	5.36882	4.0298	4.70731	4.55638	4.81154	3.81459	4.10232	3.77344	4.25943	4.22742	5.36882	4.0298	4.70731	4.55638	4.81154	3.81459	4.10232	3.77344	4.25943	4.22742	-0.659327	4.3651	-2.80405	0.0194914	0.0874614	-3.82686	NonSig	1	Single-promoter
984	ENSG00000106772	PRUNE2	chr9	76906139	-	FALSE	1	FB-PB.5006.1	2.05935	2.05935	3.52751	3.52751	Major	Major	0	1.95424	3.18199	2.34943	2.81107	4.11587	3.55876	3.85003	2.88882	3.2241	0	1.95424	3.18199	2.34943	2.81107	4.11587	3.55876	3.85003	2.88882	3.2241	1.46817	2.79343	2.6547	0.0250521	0.102244	-4.0757	NonSig	1	Single-promoter
985	ENSG00000106780	MEGF9	chr9	120714469	-	FALSE	1	FB-PB.5081.1	6.70951	6.70951	4.7519	4.7519	Major	Major	7.31017	7.84581	6.50349	5.73408	6.15402	4.9264	5.3916	4.05806	6.15932	3.2241	7.31017	7.84581	6.50349	5.73408	6.15402	4.9264	5.3916	4.05806	6.15932	3.2241	-1.95762	5.73071	-3.30395	0.00847975	0.0491444	-2.98991	DownReg	1	Single-promoter
986	ENSG00000106785	TRIM14	chr9	98119218	-	FALSE	1	FB-PB.5039.1	3.4851	3.4851	2.55556	2.55556	Major	Major	4.84684	3.64391	2.6744	2.34943	3.91094	2.42137	2.67627	2.80004	3.25432	1.62578	4.84684	3.64391	2.6744	2.34943	3.91094	2.42137	2.67627	2.80004	3.25432	1.62578	-0.929548	3.02033	-1.91244	0.0862841	0.224924	-5.26388	NonSig	1	Single-promoter
987	ENSG00000106799	TGFBR1	chr9	99105120	+	FALSE	1	FB-PB.5042.1	4.32591	4.32591	4.17319	4.17319	Major	Major	4.1719	4.18988	4.70731	4.55638	4.00406	3.92216	4.00877	4.29567	4.41194	4.22742	4.1719	4.18988	4.70731	4.55638	4.00406	3.92216	4.00877	4.29567	4.41194	4.22742	-0.152711	4.24955	-0.898197	0.391193	0.578811	-6.53231	NonSig	1	Single-promoter
988	ENSG00000106853	PTGR1	chr9	111599821	-	FALSE	1	FB-PB.5071.1	4.42382	4.42382	4.15277	4.15277	Major	Major	4.09833	4.11206	4.49409	5.16261	4.25204	4.28662	4.56355	3.92276	4.61418	3.37677	4.09833	4.11206	4.49409	5.16261	4.25204	4.28662	4.56355	3.92276	4.61418	3.37677	-0.271051	4.2883	-0.931717	0.374467	0.562131	-6.50146	NonSig	1	Single-promoter
989	ENSG00000106948	AKNA	chr9	114388041	-	FALSE	1	FB-PB.5077.1	3.64215	3.64215	1.75318	1.75318	Major	Major	4.54849	3.40377	3.4423	3.35283	3.46337	0	2.08243	2.24119	2.07153	2.37077	4.54849	3.40377	3.4423	3.35283	3.46337	0	2.08243	2.24119	2.07153	2.37077	-1.88897	2.69767	-4.07765	0.00245239	0.0223974	-1.72021	DownReg	1	Single-promoter
990	ENSG00000106991	ENG	chr9	127854688	-	FALSE	1	FB-PB.5111.1,FB-PB.5111.2	6.54183	6.54183	7.57406	7.57406	Major	Major	6.66328	5.61231	6.92168	6.33765	7.17423	7.75203	7.70826	7.67625	7.58595	7.14783	6.66328	5.61231	6.92168	6.33765	7.17423	7.75203	7.70826	7.67625	7.58595	7.14783	1.03223	7.05795	3.66974	0.00467549	0.033451	-2.38308	UpReg	1	Single-promoter
991	ENSG00000106992	AK1	chr9	127877675	-	FALSE	1	FB-PB.5112.1	3.06872	3.06872	3.89214	3.89214	Major	Major	4.24189	3.52883	3.7615	0	3.81138	4.11587	4.10232	3.60687	3.67191	3.96372	4.24189	3.52883	3.7615	0	3.81138	4.11587	4.10232	3.60687	3.67191	3.96372	0.823418	3.48043	1.1397	0.282226	0.472345	-6.28983	NonSig	1	Single-promoter
992	ENSG00000107021	TBC1D13	chr9	128787298	+	FALSE	1	FB-PB.5123.1	2.11143	2.11143	2.66811	2.66811	Major	Major	2.6727	2.94647	0	2.34943	2.58858	2.68841	3.68509	2.45245	2.88882	1.62578	2.6727	2.94647	0	2.34943	2.58858	2.68841	3.68509	2.45245	2.88882	1.62578	0.556674	2.38977	0.952087	0.364558	0.554049	-6.48226	NonSig	1	Single-promoter
994	ENSG00000107175	CREB3	chr9	35732646	+	FALSE	1	FB-PB.4973.1	5.55492	5.55492	5.00394	5.00394	Major	Major	5.7271	6.06883	5.57467	5.35537	5.0486	4.43928	5.01228	5.3404	5.41424	4.81348	5.7271	6.06883	5.57467	5.35537	5.0486	4.43928	5.01228	5.3404	5.41424	4.81348	-0.55098	5.27943	-2.26822	0.0479296	0.152302	-4.70841	NonSig	1	Single-promoter
996	ENSG00000107262	BAG1	chr9	33264722	-	FALSE	1	FB-PB.4964.1	6.45577	6.45577	6.01641	6.01641	Major	Major	6.66328	7.15824	6.09374	5.91636	6.44723	5.95409	5.98975	5.83081	6.5198	5.7876	6.66328	7.15824	6.09374	5.91636	6.44723	5.95409	5.98975	5.83081	6.5198	5.7876	-0.43936	6.23609	-1.76153	0.110101	0.258465	-5.48733	NonSig	1	Single-promoter
997	ENSG00000107341	UBE2R2	chr9	33817710	+	FALSE	1	FB-PB.4970.1	6.88479	6.88479	6.51799	6.51799	Major	Major	6.50149	7.17747	6.77573	7.13208	6.83719	6.35051	6.80832	6.80852	6.58544	6.03714	6.50149	7.17747	6.77573	7.13208	6.83719	6.35051	6.80832	6.80852	6.58544	6.03714	-0.366807	6.70139	-1.86709	0.0928832	0.23388	-5.33193	NonSig	1	Single-promoter
998	ENSG00000107372	ZFAND5	chr9	72365210	-	FALSE	1	FB-PB.5000.1	5.03116	5.03116	4.30756	4.30756	Major	Major	4.934	4.94061	5.30682	5.64831	4.32605	4.11587	5.2759	3.60687	4.08887	4.45028	4.934	4.94061	5.30682	5.64831	4.32605	4.11587	5.2759	3.60687	4.08887	4.45028	-0.723601	4.66936	-2.15624	0.0577591	0.172616	-4.88684	NonSig	1	Single-promoter
999	ENSG00000107443	CCNJ	chr10	96043560	+	FALSE	1	FB-PB.725.1	0.967199	0.967199	1.1776	1.1776	Major	Major	0.922984	0.969653	0.923938	1.01725	1.00217	1.06295	2.08243	1.69453	1.04808	0	0.922984	0.969653	0.923938	1.01725	1.00217	1.06295	2.08243	1.69453	1.04808	0	0.210399	1.0724	0.626394	0.545756	0.713709	-6.74569	NonSig	1	Single-promoter
1000	ENSG00000107554	DNMBP	chr10	100009887	-	FALSE	1	FB-PB.746.1	2.79671	2.79671	2.1633	2.1633	Major	Major	2.19665	2.27306	2.45587	3.73212	3.32583	2.68841	2.40969	1.69453	2.3981	1.62578	2.19665	2.27306	2.45587	3.73212	3.32583	2.68841	2.40969	1.69453	2.3981	1.62578	-0.633405	2.48	-1.78999	0.10519	0.252033	-5.44586	NonSig	1	Single-promoter
1001	ENSG00000107566	ERLIN1	chr10	100186029	-	FALSE	1	FB-PB.747.1	1.80117	1.80117	2.76491	2.76491	Major	Major	3.85205	0.969653	3.18199	0	1.00217	2.42137	2.90118	3.20184	3.25432	2.04584	3.85205	0.969653	3.18199	0	1.00217	2.42137	2.90118	3.20184	3.25432	2.04584	0.963739	2.28304	1.36126	0.204724	0.383862	-6.0298	NonSig	1	Single-promoter
1002	ENSG00000107581	EIF3A	chr10	119042696	-	TRUE	10	FB-PB.790.16,FB-PB.790.15,FB-PB.790.14,FB-PB.790.13,FB-PB.790.12	7.95069	75.66	8.16947	81.4083	NA	NA	8.19528	8.3651	7.75122	7.8155	7.62637	7.98695	8.32286	8.02904	8.31346	8.19502	73.3029	79.8278	72.4128	77.0322	75.7244	81.5004	81.0439	81.8029	79.3832	83.311	0.218772	8.06008	1.30255	0.223303	0.406351	-6.10188	NonSig	10	Multiple-promoter
1003	ENSG00000107581	EIF3A	chr10	119044101	-	TRUE	9	FB-PB.790.10	7.53929	75.66	7.92305	81.4083	NA	NA	7.41993	7.88142	7.14847	7.43497	7.81167	7.98695	8.0451	7.95294	7.80152	7.82871	73.3029	79.8278	72.4128	77.0322	75.7244	81.5004	81.0439	81.8029	79.3832	83.311	0.383754	7.73117	2.43439	0.0362829	0.127428	-4.43901	NonSig	10	Multiple-promoter
1004	ENSG00000107581	EIF3A	chr10	119049972	-	TRUE	8	FB-PB.790.11,FB-PB.790.9	7.25418	75.66	8.02469	81.4083	NA	NA	7.04243	7.77182	6.91096	7.1838	7.36186	8.17811	8.01534	8.01663	7.7235	8.18987	73.3029	79.8278	72.4128	77.0322	75.7244	81.5004	81.0439	81.8029	79.3832	83.311	0.770515	7.63943	4.29134	0.00176442	0.0181444	-1.38051	NonSig	10	Multiple-promoter
1005	ENSG00000107581	EIF3A	chr10	119050633	-	TRUE	7	FB-PB.790.8	7.98724	75.66	9.13337	81.4083	NA	NA	7.67525	8.53501	7.46653	8.10026	8.15914	9.13427	9.06288	8.92591	9.09724	9.44658	73.3029	79.8278	72.4128	77.0322	75.7244	81.5004	81.0439	81.8029	79.3832	83.311	1.14614	8.5603	5.49284	0.000312803	0.00622113	0.412511	UpReg	10	Multiple-promoter
1006	ENSG00000107581	EIF3A	chr10	119051267	-	TRUE	6	FB-PB.790.7	7.94984	75.66	8.91762	81.4083	NA	NA	7.04243	8.49341	7.94753	8.1322	8.1336	8.88787	8.83656	8.97803	8.61792	9.26772	73.3029	79.8278	72.4128	77.0322	75.7244	81.5004	81.0439	81.8029	79.3832	83.311	0.967784	8.43373	3.74857	0.00412058	0.030928	-2.25366	NonSig	10	Multiple-promoter
1007	ENSG00000107581	EIF3A	chr10	119056985	-	TRUE	5	FB-PB.790.6	7.37109	75.66	8.07858	81.4083	NA	NA	6.66328	7.92759	6.91096	7.73457	7.61902	8.12281	7.92221	8.34574	7.55351	8.44864	73.3029	79.8278	72.4128	77.0322	75.7244	81.5004	81.0439	81.8029	79.3832	83.311	0.707496	7.72483	2.50215	0.0323787	0.119341	-4.32789	NonSig	10	Multiple-promoter
1008	ENSG00000107581	EIF3A	chr10	119058110	-	TRUE	4	FB-PB.790.5	7.2481	75.66	7.81064	81.4083	NA	NA	6.61134	7.42282	7.06392	7.98835	7.15405	7.73738	7.89632	8.12463	7.37014	7.92473	73.3029	79.8278	72.4128	77.0322	75.7244	81.5004	81.0439	81.8029	79.3832	83.311	0.562543	7.52937	2.22438	0.0515668	0.160603	-4.77859	NonSig	10	Multiple-promoter
1009	ENSG00000107581	EIF3A	chr10	119059399	-	TRUE	3	FB-PB.790.4	7.89431	75.66	8.52748	81.4083	NA	NA	7.7127	8.54615	7.58588	7.85432	7.7725	8.54919	8.25318	8.59139	8.33747	8.90616	73.3029	79.8278	72.4128	77.0322	75.7244	81.5004	81.0439	81.8029	79.3832	83.311	0.633171	8.2109	3.07855	0.012316	0.0636712	-3.36716	NonSig	10	Multiple-promoter
1010	ENSG00000107581	EIF3A	chr10	119073577	-	TRUE	2	FB-PB.790.1	7.51933	75.66	7.56848	81.4083	NA	NA	7.85908	7.76548	7.05421	7.65617	7.26169	7.61447	7.4833	7.7126	7.52033	7.51167	73.3029	79.8278	72.4128	77.0322	75.7244	81.5004	81.0439	81.8029	79.3832	83.311	0.0491478	7.5439	0.288287	0.779295	0.877954	-6.91087	NonSig	10	Multiple-promoter
1011	ENSG00000107581	EIF3A	chr10	119080820	-	FALSE	1	FB-PB.790.2,FB-PB.790.3,FB-PB.790.19,FB-PB.790.20	6.94596	75.66	7.25488	81.4083	Minor	Minor	7.08114	7.119	6.57312	7.13208	6.82448	7.30237	7.20616	7.12595	7.04806	7.59186	73.3029	79.8278	72.4128	77.0322	75.7244	81.5004	81.0439	81.8029	79.3832	83.311	0.308917	7.10042	1.9571	0.0802167	0.214825	-5.19617	NonSig	10	Multiple-promoter
1012	ENSG00000107651	SEC23IP	chr10	119892710	+	FALSE	1	FB-PB.792.1,FB-PB.792.2,FB-PB.792.3	5.21421	5.21421	5.44759	5.44759	Major	Major	5.45974	4.98495	4.93595	5.16261	5.5278	5.79338	5.46388	5.39254	5.48474	5.10339	5.45974	4.98495	4.93595	5.16261	5.5278	5.79338	5.46388	5.39254	5.48474	5.10339	0.233375	5.3309	1.34877	0.208565	0.388879	-6.04532	NonSig	1	Single-promoter
1013	ENSG00000107669	ATE1	chr10	121928030	-	FALSE	2	FB-PB.794.1,FB-PB.794.3	2.3554	3.51894	2.93156	4.29718	Major	Major	1.48133	2.94647	2.6744	2.34943	2.3254	1.6683	3.09572	2.94676	3.08311	3.8639	1.48133	2.94647	4.55875	3.95734	4.65079	4.77673	4.15119	2.94676	5.74733	3.8639	0.576154	2.64348	1.42255	0.18674	0.361308	-5.9523	NonSig	2	Multiple-promoter
1014	ENSG00000107669	ATE1	chr10	121928463	-	FALSE	1	FB-PB.794.2	1.16353	3.51894	1.36562	4.29718	Minor	Minor	0	0	1.88435	1.60792	2.3254	3.10843	1.05547	0	2.66422	0	1.48133	2.94647	4.55875	3.95734	4.65079	4.77673	4.15119	2.94676	5.74733	3.8639	0.202092	1.26458	0.26853	0.79401	0.887823	-6.91684	NonSig	2	Multiple-promoter
1015	ENSG00000107758	PPP3CB	chr10	73495995	-	FALSE	1	FB-PB.677.1,FB-PB.677.2	3.52109	3.52109	3.59188	3.59188	Major	Major	3.03003	2.75493	3.7615	4.35453	3.70444	2.68841	4.10232	3.60687	4.3377	3.2241	3.03003	2.75493	3.7615	4.35453	3.70444	2.68841	4.10232	3.60687	4.3377	3.2241	0.0707927	3.55648	0.183141	0.858522	0.932238	-6.93784	NonSig	1	Single-promoter
1016	ENSG00000107771	CCSER2	chr10	84328604	+	FALSE	1	FB-PB.692.1	3.42742	3.42742	3.87284	3.87284	Major	Major	1.88288	4.18988	3.94079	4.11976	3.00379	3.92216	4.42556	3.60687	3.54569	3.8639	1.88288	4.18988	3.94079	4.11976	3.00379	3.92216	4.42556	3.60687	3.54569	3.8639	0.445417	3.65013	1.01907	0.333323	0.525114	-6.41671	NonSig	1	Single-promoter
1017	ENSG00000107779	BMPR1A	chr10	86756524	+	FALSE	1	FB-PB.694.1,FB-PB.694.2	4.57767	4.57767	3.85675	3.85675	Major	Major	4.65494	4.46494	5.16969	4.20234	4.39645	3.57192	3.80124	4.05806	4.3377	3.51481	4.65494	4.46494	5.16969	4.20234	4.39645	3.57192	3.80124	4.05806	4.3377	3.51481	-0.720924	4.21721	-3.21928	0.00975123	0.0538103	-3.13146	NonSig	1	Single-promoter
1019	ENSG00000107816	LZTS2	chr10	100997066	+	FALSE	1	FB-PB.752.1,FB-PB.752.3	0.83671	0.83671	1.24312	1.24312	Major	Major	2.19665	0.969653	0	1.01725	0	1.6683	1.65846	0	2.88882	0	2.19665	0.969653	0	1.01725	0	1.6683	1.65846	0	2.88882	0	0.406406	1.03991	0.639412	0.537609	0.706159	-6.73703	NonSig	1	Single-promoter
1020	ENSG00000107819	SFXN3	chr10	101031258	+	FALSE	1	FB-PB.755.1	4.04777	4.04777	2.53521	2.53521	Major	Major	4.43354	4.46494	4.43547	3.20045	3.70444	2.09343	2.67627	2.45245	3.08311	2.37077	4.43354	4.46494	4.43547	3.20045	3.70444	2.09343	2.67627	2.45245	3.08311	2.37077	-1.51256	3.29149	-5.1736	0.000485424	0.00831372	-0.0435373	DownReg	1	Single-promoter
1021	ENSG00000107854	TNKS2	chr10	91798411	+	FALSE	1	FB-PB.712.1,FB-PB.712.2	3.52843	3.52843	4.123	4.123	Major	Major	3.66089	3.11553	3.85393	3.20045	3.81138	4.11587	4.00877	4.05806	4.79152	3.6408	3.66089	3.11553	3.85393	3.20045	3.81138	4.11587	4.00877	4.05806	4.79152	3.6408	0.594569	3.82572	2.49115	0.0329833	0.120437	-4.34598	NonSig	1	Single-promoter
1022	ENSG00000107862	GBF1	chr10	102245532	+	FALSE	1	FB-PB.758.1,FB-PB.758.2,FB-PB.758.3	5.04858	5.04858	5.41308	5.41308	Major	Major	5.13131	5.52492	5.27374	4.35453	4.95839	5.84896	5.77926	5.25847	5.26198	4.91673	5.13131	5.52492	5.27374	4.35453	4.95839	5.84896	5.77926	5.25847	5.26198	4.91673	0.364501	5.23083	1.41987	0.187497	0.362533	-5.95574	NonSig	1	Single-promoter
1023	ENSG00000107882	SUFU	chr10	102503972	+	FALSE	1	FB-PB.759.2	5.30873	5.30873	4.17869	4.17869	Major	Major	5.84424	5.22566	5.30682	5.35537	4.81154	4.20377	4.4962	4.29567	5.26198	2.63581	5.84424	5.22566	5.30682	5.35537	4.81154	4.20377	4.4962	4.29567	5.26198	2.63581	-1.13004	4.74371	-2.63293	0.0259863	0.104211	-4.11183	NonSig	1	Single-promoter
1024	ENSG00000107897	ACBD5	chr10	27240812	-	FALSE	1	FB-PB.600.1	1.03986	1.03986	1.36474	1.36474	Major	Major	0.922984	2.27306	0	0	2.00325	1.06295	0	1.31681	2.3981	2.04584	0.922984	2.27306	0	0	2.00325	1.06295	0	1.31681	2.3981	2.04584	0.324881	1.2023	0.550879	0.594385	0.749774	-6.79263	NonSig	1	Single-promoter
1025	ENSG00000107937	GTPBP4	chr10	988456	+	FALSE	1	FB-PB.564.1	4.98059	4.98059	5.93238	5.93238	Major	Major	4.934	5.11032	4.93595	4.49218	5.4305	5.73557	6.25716	6.02501	5.41424	6.2299	4.934	5.11032	4.93595	4.49218	5.4305	5.73557	6.25716	6.02501	5.41424	6.2299	0.951785	5.45648	4.33084	0.0016614	0.0175455	-1.31835	NonSig	1	Single-promoter
1026	ENSG00000107938	EDRF1	chr10	125719709	+	FALSE	1	FB-PB.805.1	4.13653	4.13653	2.7521	2.7521	Major	Major	4.6027	4.18988	3.7615	3.73212	4.39645	2.09343	3.42029	2.94676	2.66422	2.63581	4.6027	4.18988	3.7615	3.73212	4.39645	2.09343	3.42029	2.94676	2.66422	2.63581	-1.38443	3.44432	-5.1677	0.000489448	0.00833765	-0.0521046	DownReg	1	Single-promoter
1027	ENSG00000107949	BCCIP	chr10	125823533	+	FALSE	1	FB-PB.807.1	6.28984	6.28984	6.97753	6.97753	Major	Major	5.84424	6.82183	5.99571	6.37373	6.41368	6.9424	6.83582	7.36655	6.88819	6.85468	5.84424	6.82183	5.99571	6.37373	6.41368	6.9424	6.83582	7.36655	6.88819	6.85468	0.687695	6.63368	3.41651	0.00704978	0.0436351	-2.80226	NonSig	1	Single-promoter
1028	ENSG00000107951	MTPAP	chr10	30349348	-	FALSE	1	FB-PB.608.1	4.91911	4.91911	5.17225	5.17225	Major	Major	4.49216	4.94061	5.27374	4.84044	5.0486	5.64426	5.10561	5.23009	4.73479	5.14651	4.49216	4.94061	5.27374	4.84044	5.0486	5.64426	5.10561	5.23009	4.73479	5.14651	0.253144	5.04568	1.27906	0.231119	0.41595	-6.13009	NonSig	1	Single-promoter
1029	ENSG00000107959	PITRM1	chr10	3172782	-	FALSE	1	FB-PB.563.1	3.5304	3.5304	4.12412	4.12412	Major	Major	3.18019	3.40377	3.0318	4.03217	4.00406	4.28662	3.42029	4.45128	3.54569	4.91673	3.18019	3.40377	3.0318	4.03217	4.00406	4.28662	3.42029	4.45128	3.54569	4.91673	0.59372	3.82726	1.78599	0.105868	0.252612	-5.45171	NonSig	1	Single-promoter
1030	ENSG00000107984	DKK1	chr10	52314281	+	FALSE	1	FB-PB.643.1	3.60158	3.60158	2.20171	2.20171	Major	Major	4.1719	4.18988	3.4423	3.03005	3.17378	2.09343	4.35129	3.51577	1.04808	0	4.1719	4.18988	3.4423	3.03005	3.17378	2.09343	4.35129	3.51577	1.04808	0	-1.39987	2.90165	-1.83184	0.0983338	0.242658	-5.3843	NonSig	1	Single-promoter
1031	ENSG00000108055	SMC3	chr10	110567695	+	FALSE	1	FB-PB.772.1,FB-PB.772.2	3.83117	3.83117	3.64954	3.64954	Major	Major	3.55488	3.75048	3.55673	4.11976	4.17402	2.91365	3.90873	3.77344	3.78798	3.8639	3.55488	3.75048	3.55673	4.11976	4.17402	2.91365	3.90873	3.77344	3.78798	3.8639	-0.181633	3.74036	-0.800337	0.442995	0.62659	-6.61685	NonSig	1	Single-promoter
1032	ENSG00000108061	SHOC2	chr10	110919543	+	FALSE	1	FB-PB.777.1,FB-PB.777.2	4.66239	4.66239	4.78815	4.78815	Major	Major	4.49216	4.11206	5.05755	4.89111	4.75906	4.43928	4.27298	5.07917	5.13622	5.01308	4.49216	4.11206	5.05755	4.89111	4.75906	4.43928	4.27298	5.07917	5.13622	5.01308	0.125758	4.72527	0.524052	0.612203	0.764864	-6.80795	NonSig	1	Single-promoter
1033	ENSG00000108091	CCDC6	chr10	59906551	-	FALSE	1	FB-PB.650.1,FB-PB.650.2,FB-PB.650.3	6.46156	6.46156	6.3592	6.3592	Major	Major	6.82023	7.32273	5.5193	6.6189	6.02664	6.61381	6.37431	6.05768	5.97569	6.77448	6.82023	7.32273	5.5193	6.6189	6.02664	6.61381	6.37431	6.05768	5.97569	6.77448	-0.102366	6.41038	-0.308371	0.76443	0.86863	-6.90437	NonSig	1	Single-promoter
1034	ENSG00000108094	CUL2	chr10	35090381	-	FALSE	2	FB-PB.616.2,FB-PB.616.1	4.93624	8.88988	4.65117	9.73925	Major	Minor	5.05559	4.69586	5.23989	4.55638	5.13349	5.02622	4.27298	4.67829	5.22127	4.05708	9.8568	8.95957	9.00139	7.90921	8.72243	10.539	9.18547	9.65871	10.4425	8.87056	-0.285077	4.79371	-1.14051	0.281905	0.472009	-6.28895	NonSig	2	Multiple-promoter
1035	ENSG00000108094	CUL2	chr10	35090613	-	FALSE	1	FB-PB.616.3	3.95364	8.88988	5.08809	9.73925	Minor	Major	4.80121	4.26371	3.7615	3.35283	3.58894	5.51277	4.91249	4.98041	5.22127	4.81348	9.8568	8.95957	9.00139	7.90921	8.72243	10.539	9.18547	9.65871	10.4425	8.87056	1.13445	4.52086	4.0824	0.00243432	0.0222843	-1.71259	UpReg	2	Multiple-promoter
1036	ENSG00000108239	TBC1D12	chr10	94402453	+	FALSE	1	FB-PB.721.1	4.28535	4.28535	3.09676	3.09676	Major	Major	5.36882	4.46494	3.55673	4.03217	4.00406	2.42137	2.90118	3.51577	2.88882	3.75666	5.36882	4.46494	3.55673	4.03217	4.00406	2.42137	2.90118	3.51577	2.88882	3.75666	-1.18859	3.69105	-3.23997	0.00942346	0.0523111	-3.09685	NonSig	1	Single-promoter
1037	ENSG00000108312	UBTF	chr17	44219498	-	FALSE	1	FB-PB.2197.1	1.68305	1.68305	3.09193	3.09193	Major	Major	0	1.54436	2.6744	1.60792	2.58858	3.28001	2.90118	2.80004	3.25432	3.2241	0	1.54436	2.6744	1.60792	2.58858	3.28001	2.90118	2.80004	3.25432	3.2241	1.40888	2.38749	3.06406	0.0126167	0.0647865	-3.39144	NonSig	1	Single-promoter
1038	ENSG00000108349	CASC3	chr17	40140318	+	FALSE	1	FB-PB.2171.1,FB-PB.2171.2	5.98428	5.98428	5.56854	5.56854	Major	Major	6.03374	5.79772	6.07466	6.01104	6.00427	5.97921	5.83483	5.01409	4.84609	6.16847	6.03374	5.79772	6.07466	6.01104	6.00427	5.97921	5.83483	5.01409	4.84609	6.16847	-0.415745	5.77641	-1.57791	0.147143	0.308621	-5.74632	NonSig	1	Single-promoter
1039	ENSG00000108395	TRIM37	chr17	59106757	-	FALSE	1	FB-PB.2241.1	3.79569	3.79569	3.9492	3.9492	Major	Major	3.66089	4.33395	3.66274	3.61643	3.70444	4.02226	3.90873	4.54641	2.88882	4.37975	3.66089	4.33395	3.66274	3.61643	3.70444	4.02226	3.90873	4.54641	2.88882	4.37975	0.153505	3.87244	0.503145	0.626277	0.777735	-6.81939	NonSig	1	Single-promoter
1040	ENSG00000108424	KPNB1	chr17	47649941	+	FALSE	1	FB-PB.2214.1,FB-PB.2214.2,FB-PB.2214.3,FB-PB.2214.4,FB-PB.2214.5	6.65432	27.8396	7.33513	30.6445	Minor	Minor	7.13731	6.99441	6.70305	6.20375	6.2331	7.54043	7.15249	7.47935	7.30344	7.19993	28.3113	28.8758	27.2681	27.8931	26.8496	30.7126	29.7534	32.0892	29.9721	30.6953	0.680806	6.99472	3.28004	0.00882041	0.0502302	-3.02985	NonSig	4	Multiple-promoter
1041	ENSG00000108424	KPNB1	chr17	47658562	+	TRUE	2	FB-PB.2214.7	6.69389	27.8396	7.45374	30.6445	NA	NA	6.68857	6.6397	6.71542	6.86689	6.55888	7.45345	7.28808	8.01247	7.03637	7.47831	28.3113	28.8758	27.2681	27.8931	26.8496	30.7126	29.7534	32.0892	29.9721	30.6953	0.759847	7.07381	4.29617	0.00175148	0.0181064	-1.3729	NonSig	4	Multiple-promoter
1042	ENSG00000108424	KPNB1	chr17	47668307	+	TRUE	3	FB-PB.2214.8	6.97095	27.8396	7.78886	30.6445	NA	NA	6.63755	7.31407	6.84493	7.23374	6.82448	7.79512	7.4833	8.11302	7.73077	7.82208	28.3113	28.8758	27.2681	27.8931	26.8496	30.7126	29.7534	32.0892	29.9721	30.6953	0.817905	7.3799	4.71297	0.00093904	0.0123928	-0.727858	NonSig	4	Multiple-promoter
1043	ENSG00000108424	KPNB1	chr17	47669810	+	TRUE	4	FB-PB.2214.9	7.5204	27.8396	8.06681	30.6445	NA	NA	7.8479	7.92759	7.00467	7.5887	7.23313	7.92364	7.82949	8.48434	7.90155	8.19502	28.3113	28.8758	27.2681	27.8931	26.8496	30.7126	29.7534	32.0892	29.9721	30.6953	0.546412	7.7936	2.54281	0.0302394	0.11448	-4.26093	NonSig	4	Multiple-promoter
1044	ENSG00000108433	GOSR2	chr17	46923138	+	FALSE	1	FB-PB.2209.1,FB-PB.2209.2	4.07034	4.07034	4.4855	4.4855	Major	Major	3.66089	4.40093	3.7615	4.20234	4.32605	4.87378	4.4962	4.12123	4.79152	4.14476	3.66089	4.40093	3.7615	4.20234	4.32605	4.87378	4.4962	4.12123	4.79152	4.14476	0.415158	4.27792	1.90846	0.0868449	0.225785	-5.26988	NonSig	1	Single-promoter
1045	ENSG00000108439	PNPO	chr17	47941590	+	FALSE	1	FB-PB.2216.1,FB-PB.2216.2	2.56052	2.56052	3.37749	3.37749	Major	Major	2.45422	2.94647	2.19823	3.20045	2.00325	3.57192	3.42029	2.94676	4.08887	2.85963	2.45422	2.94647	2.19823	3.20045	2.00325	3.57192	3.42029	2.94676	4.08887	2.85963	0.816971	2.96901	2.69516	0.0234047	0.0980843	-4.00845	NonSig	1	Single-promoter
1046	ENSG00000108443	RPS6KB1	chr17	59893126	+	FALSE	1	FB-PB.2248.1	4.70099	4.70099	4.26008	4.26008	Major	Major	4.02082	5.79772	4.43547	4.20234	5.0486	4.11587	4.19017	4.05806	4.79152	4.14476	4.02082	5.79772	4.43547	4.20234	5.0486	4.11587	4.19017	4.05806	4.79152	4.14476	-0.440912	4.48053	-1.32317	0.216624	0.398841	-6.07682	NonSig	1	Single-promoter
1047	ENSG00000108465	CDK5RAP3	chr17	47971128	+	FALSE	1	FB-PB.2217.1	5.92624	5.92624	5.55857	5.55857	Major	Major	6.63755	5.55464	6.16763	5.45977	5.81161	5.79338	5.31551	5.25847	5.58442	5.84108	6.63755	5.55464	6.16763	5.45977	5.81161	5.79338	5.31551	5.25847	5.58442	5.84108	-0.36767	5.74241	-1.51859	0.161295	0.329314	-5.82651	NonSig	1	Single-promoter
1048	ENSG00000108469	RECQL5	chr17	75667179	-	FALSE	1	FB-PB.2285.1	2.98802	2.98802	2.44348	2.44348	Major	Major	3.44047	3.52883	3.0318	2.6136	2.3254	2.91365	2.08243	2.45245	2.3981	2.37077	3.44047	3.52883	3.0318	2.6136	2.3254	2.91365	2.08243	2.45245	2.3981	2.37077	-0.544539	2.71575	-2.09097	0.0643584	0.185029	-4.98945	NonSig	1	Single-promoter
1049	ENSG00000108506	INTS2	chr17	61927982	-	FALSE	1	FB-PB.2254.1,FB-PB.2254.2	2.09623	2.09623	1.22793	1.22793	Major	Major	0	2.94647	3.18199	2.34943	2.00325	1.06295	0	1.9936	3.08311	0	0	2.94647	3.18199	2.34943	2.00325	1.06295	0	1.9936	3.08311	0	-0.868295	1.66208	-1.14886	0.27861	0.468927	-6.27975	NonSig	1	Single-promoter
1051	ENSG00000108582	CPD	chr17	30378924	+	FALSE	1	FB-PB.2146.1,FB-PB.2146.2,FB-PB.2146.3,FB-PB.2146.4	6.15068	6.15068	6.15905	6.15905	Major	Major	6.44326	6.02704	6.55946	5.96448	5.75914	6.209	6.03791	6.22519	6.26326	6.05987	6.44326	6.02704	6.55946	5.96448	5.75914	6.209	6.03791	6.22519	6.26326	6.05987	0.00836958	6.15486	0.0496313	0.96144	0.993387	-6.95483	NonSig	1	Single-promoter
1052	ENSG00000108588	CCDC47	chr17	63773590	-	FALSE	1	FB-PB.2258.1,FB-PB.2258.2	6.27057	6.27057	6.14619	6.14619	Major	Major	5.99373	6.59749	5.97528	6.46017	6.32621	6.42556	5.83483	6.37527	5.67766	6.41763	5.99373	6.59749	5.97528	6.46017	6.32621	6.42556	5.83483	6.37527	5.67766	6.41763	-0.124386	6.20838	-0.604274	0.55976	0.725005	-6.76002	NonSig	1	Single-promoter
1053	ENSG00000108592	FTSJ3	chr17	63827106	-	FALSE	1	FB-PB.2259.1	3.25196	3.25196	2.3429	2.3429	Major	Major	1.48133	4.11206	3.7615	3.20045	3.70444	1.6683	2.67627	3.07993	2.66422	1.62578	1.48133	4.11206	3.7615	3.20045	3.70444	1.6683	2.67627	3.07993	2.66422	1.62578	-0.909056	2.79743	-1.77572	0.107627	0.255256	-5.4667	NonSig	1	Single-promoter
1054	ENSG00000108654	DDX5	chr17	64506289	-	FALSE	1	FB-PB.2262.1,FB-PB.2262.2,FB-PB.2262.3,FB-PB.2262.4,FB-PB.2262.5	10.7679	10.7679	9.85997	9.85997	Major	Major	11.0584	11.0081	10.5869	10.7286	10.4576	9.81836	9.98836	9.78385	9.89702	9.81228	11.0584	11.0081	10.5869	10.7286	10.4576	9.81836	9.98836	9.78385	9.89702	9.81228	-0.907966	10.314	-6.39786	9.71232e-05	0.00301416	1.62478	NonSig	1	Single-promoter
1055	ENSG00000108669	CYTH1	chr17	78782297	-	FALSE	1	FB-PB.2293.1,FB-PB.2293.2	5.20999	5.20999	5.14914	5.14914	Major	Major	5.70249	5.1498	4.2438	6.14233	4.81154	5.67534	4.96325	4.40125	5.09174	5.61413	5.70249	5.1498	4.2438	6.14233	4.81154	5.67534	4.96325	4.40125	5.09174	5.61413	-0.0608482	5.17957	-0.159321	0.87674	0.940894	-6.9423	NonSig	1	Single-promoter
1056	ENSG00000108671	PSMD11	chr17	32444501	+	FALSE	1	FB-PB.2154.1,FB-PB.2154.2	4.96547	4.96547	6.14851	6.14851	Major	Major	4.70536	4.98495	4.93595	4.9874	5.21367	6.12142	5.66125	6.26769	5.67766	7.01452	4.70536	4.98495	4.93595	4.9874	5.21367	6.12142	5.66125	6.26769	5.67766	7.01452	1.18304	5.55699	4.66277	0.00101092	0.0130719	-0.804279	UpReg	1	Single-promoter
1057	ENSG00000108773	KAT2A	chr17	42121346	-	FALSE	1	FB-PB.2182.1	3.85863	3.85863	2.82765	2.82765	Major	Major	4.37244	3.52883	4.55042	3.03005	3.81138	2.68841	3.09572	2.24119	2.88882	3.2241	4.37244	3.52883	4.55042	3.03005	3.81138	2.68841	3.09572	2.24119	2.88882	3.2241	-1.03098	3.34314	-3.30792	0.00842462	0.0489728	-2.98329	DownReg	1	Single-promoter
1058	ENSG00000108821	COL1A1	chr17	50194449	-	TRUE	4	FB-PB.2225.5	12.5673	47.8289	13.1832	51.0713	NA	NA	12.973	12.3369	12.5313	12.177	12.8183	13.2157	13.3099	13.2407	12.97	13.1797	48.4889	47.1559	47.7087	46.4221	49.3689	51.4229	51.2235	51.1542	50.3346	51.2213	0.615899	12.8752	3.64683	0.004851	0.0340004	-2.42079	NonSig	4	Multiple-promoter
1059	ENSG00000108821	COL1A1	chr17	50195100	-	TRUE	3	FB-PB.2225.4	12.0882	47.8289	12.8737	51.0713	NA	NA	12.3475	12.0347	12.0556	11.6131	12.3902	12.8729	12.8986	12.9043	12.673	13.0195	48.4889	47.1559	47.7087	46.4221	49.3689	51.4229	51.2235	51.1542	50.3346	51.2213	0.785449	12.4809	4.8282	0.000793872	0.011069	-0.553792	NonSig	4	Multiple-promoter
1060	ENSG00000108821	COL1A1	chr17	50195948	-	TRUE	2	FB-PB.2225.14	12.1531	47.8289	12.9379	51.0713	NA	NA	12.2926	12.0198	12.0946	11.7871	12.5716	13.0458	13.0249	13.0067	12.7072	12.9049	48.4889	47.1559	47.7087	46.4221	49.3689	51.4229	51.2235	51.1542	50.3346	51.2213	0.784786	12.5455	4.91517	0.000700251	0.0101614	-0.423674	NonSig	4	Multiple-promoter
1061	ENSG00000108821	COL1A1	chr17	50201631	-	FALSE	1	FB-PB.2225.1,FB-PB.2225.2	11.0203	47.8289	12.0765	51.0713	Minor	Minor	10.8758	10.7644	11.0273	10.8448	11.5888	12.2885	11.99	12.0025	11.9845	12.1171	48.4889	47.1559	47.7087	46.4221	49.3689	51.4229	51.2235	51.1542	50.3346	51.2213	1.05625	11.5484	6.21692	0.000121647	0.00335804	1.39177	UpReg	4	Multiple-promoter
1062	ENSG00000108828	VAT1	chr17	43022380	-	FALSE	1	FB-PB.2194.1	7.25871	7.25871	6.0301	6.0301	Major	Major	7.33441	6.92783	7.45182	7.35601	7.22347	6.1876	6.29728	5.77298	6.34132	5.55133	7.33441	6.92783	7.45182	7.35601	7.22347	6.1876	6.29728	5.77298	6.34132	5.55133	-1.22861	6.6444	-6.57932	7.78183e-05	0.00260592	1.8539	DownReg	1	Single-promoter
1063	ENSG00000108829	LRRC59	chr17	50397400	-	FALSE	1	FB-PB.2228.1	6.19966	6.19966	7.93661	7.93661	Major	Major	6.23593	6.50917	6.20321	6.16309	5.88691	8.34688	7.7008	8.18871	7.50345	7.94319	6.23593	6.50917	6.20321	6.16309	5.88691	8.34688	7.7008	8.18871	7.50345	7.94319	1.73695	7.06813	9.19254	4.79154e-06	0.000629817	4.70133	UpReg	1	Single-promoter
1064	ENSG00000108840	HDAC5	chr17	44123640	-	FALSE	1	FB-PB.2196.2,FB-PB.2196.1	5.05446	5.05446	4.56856	4.56856	Major	Major	4.65494	5.18823	4.93595	5.78855	4.70461	4.81916	4.80529	4.12123	4.79152	4.30559	4.65494	5.18823	4.93595	5.78855	4.70461	4.81916	4.80529	4.12123	4.79152	4.30559	-0.4859	4.81151	-1.95657	0.0802863	0.214865	-5.19698	NonSig	1	Single-promoter
1065	ENSG00000108848	LUC7L3	chr17	50719570	+	FALSE	1	FB-PB.2234.1,FB-PB.2234.2,FB-PB.2234.4,FB-PB.2234.3,FB-PB.2234.5	7.62023	7.62023	7.16812	7.16812	Major	Major	7.42746	7.76548	7.58588	7.54981	7.7725	6.87707	7.3466	7.45503	6.95179	7.21013	7.42746	7.76548	7.58588	7.54981	7.7725	6.87707	7.3466	7.45503	6.95179	7.21013	-0.4521	7.39417	-3.07657	0.0123567	0.0637858	-3.37048	NonSig	1	Single-promoter
1067	ENSG00000108861	DUSP3	chr17	43778976	-	FALSE	1	FB-PB.2195.1,FB-PB.2195.2	4.88719	4.88719	4.85168	4.85168	Major	Major	4.89108	4.84763	4.60463	4.84044	5.25215	5.07365	5.0597	4.67829	3.8954	5.55133	4.89108	4.84763	4.60463	4.84044	5.25215	5.07365	5.0597	4.67829	3.8954	5.55133	-0.0355109	4.86943	-0.125033	0.903093	0.960456	-6.94762	NonSig	1	Single-promoter
1068	ENSG00000108883	EFTUD2	chr17	44899418	-	FALSE	1	FB-PB.2202.1	4.43807	4.43807	5.68142	5.68142	Major	Major	4.43354	4.11206	4.02271	4.61784	5.0042	5.76476	5.66125	5.83081	5.13622	6.01404	4.43354	4.11206	4.02271	4.61784	5.0042	5.76476	5.66125	5.83081	5.13622	6.01404	1.24334	5.05974	5.4323	0.000339612	0.00639209	0.327177	UpReg	1	Single-promoter
1069	ENSG00000108946	PRKAR1A	chr17	68512002	+	FALSE	1	FB-PB.2273.1	4.53648	16.9058	5.01158	18.065	Minor	Minor	3.44047	5.26215	4.55042	4.61784	4.81154	4.81916	4.80529	5.53854	4.79152	5.10339	15.5393	17.8191	17.1237	16.9563	17.0906	18.2585	17.636	18.817	18.1619	17.4515	0.475096	4.77403	1.49613	0.166958	0.337013	-5.85639	NonSig	3	Multiple-promoter
1070	ENSG00000108946	PRKAR1A	chr17	68512416	+	FALSE	2	FB-PB.2273.2,FB-PB.2273.4,FB-PB.2273.3,FB-PB.2273.5,FB-PB.2273.6	7.41704	16.9058	7.25929	18.065	Major	Major	7.252	7.22446	7.3681	7.72063	7.52001	7.25171	7.298	7.23707	7.12733	7.38236	15.5393	17.8191	17.1237	16.9563	17.0906	18.2585	17.636	18.817	18.1619	17.4515	-0.157748	7.33817	-1.24312	0.243516	0.428999	-6.17257	NonSig	3	Multiple-promoter
1071	ENSG00000108946	PRKAR1A	chr17	68512728	+	FALSE	3	FB-PB.2273.9,FB-PB.2273.8,FB-PB.2273.7	4.95229	16.9058	5.7941	18.065	Minor	Minor	4.84684	5.33246	5.20522	4.61784	4.75906	6.1876	5.53271	6.04144	6.24306	4.96571	15.5393	17.8191	17.1237	16.9563	17.0906	18.2585	17.636	18.817	18.1619	17.4515	0.841817	5.37319	3.13353	0.0112402	0.0596736	-3.27504	NonSig	3	Multiple-promoter
1072	ENSG00000108960	MMD	chr17	55421943	-	FALSE	1	FB-PB.2232.1	1.20712	1.20712	3.04567	3.04567	Major	Major	0	0.969653	2.45587	1.60792	1.00217	3.43334	3.55876	2.94676	1.64871	3.6408	0	0.969653	2.45587	1.60792	1.00217	3.43334	3.55876	2.94676	1.64871	3.6408	1.83855	2.1264	3.61	0.00514781	0.0356975	-2.48153	UpReg	1	Single-promoter
1073	ENSG00000109046	WSB1	chr17	27294080	+	FALSE	1	FB-PB.2134.1,FB-PB.2134.3,FB-PB.2134.2	7.89647	7.89647	6.80648	6.80648	Major	Major	7.41993	8.67351	7.7985	7.93502	7.65537	6.66116	6.94086	6.80852	6.78021	6.84162	7.41993	8.67351	7.7985	7.93502	7.65537	6.66116	6.94086	6.80852	6.78021	6.84162	-1.08999	7.35147	-5.02679	0.000597045	0.0093256	-0.258284	DownReg	1	Single-promoter
1074	ENSG00000109065	NAT9	chr17	74776386	-	FALSE	1	FB-PB.2280.1	2.50915	2.50915	1.54804	1.54804	Major	Major	3.85205	2.27306	1.48263	2.34943	2.58858	2.09343	1.05547	1.31681	1.64871	1.62578	3.85205	2.27306	1.48263	2.34943	2.58858	2.09343	1.05547	1.31681	1.64871	1.62578	-0.961107	2.02859	-2.42857	0.0366394	0.128287	-4.44853	NonSig	1	Single-promoter
1075	ENSG00000109066	TMEM104	chr17	74776497	+	FALSE	1	FB-PB.2278.1	2.4254	2.4254	3.70722	3.70722	Major	Major	1.88288	2.75493	2.45587	3.03005	2.00325	3.69835	3.80124	3.85003	3.54569	3.6408	1.88288	2.75493	2.45587	3.03005	2.00325	3.69835	3.80124	3.85003	3.54569	3.6408	1.28182	3.06631	5.74413	0.00022357	0.00497698	0.760965	UpReg	1	Single-promoter
1076	ENSG00000109079	TNFAIP1	chr17	28335724	+	FALSE	1	FB-PB.2135.1,FB-PB.2135.2	3.64666	3.64666	3.62061	3.62061	Major	Major	4.54849	4.6415	3.0318	3.20045	2.81107	3.57192	4.19017	3.41852	3.54569	3.37677	4.54849	4.6415	3.0318	3.20045	2.81107	3.57192	4.19017	3.41852	3.54569	3.37677	-0.0260491	3.63364	-0.0662074	0.94858	0.988089	-6.95378	NonSig	1	Single-promoter
1077	ENSG00000109089	CDR2L	chr17	74987632	+	FALSE	1	FB-PB.2279.1	2.37529	2.37529	3.90623	3.90623	Major	Major	1.88288	1.95424	2.19823	3.03005	2.81107	4.28662	4.00877	4.12123	2.66422	4.45028	1.88288	1.95424	2.19823	3.03005	2.81107	4.28662	4.00877	4.12123	2.66422	4.45028	1.53093	3.14076	4.12159	0.00229067	0.0212575	-1.64989	UpReg	1	Single-promoter
1078	ENSG00000109111	SUPT6H	chr17	28662212	+	FALSE	1	FB-PB.2139.1	5.26747	5.26747	5.0767	5.0767	Major	Major	5.33719	4.74825	5.16969	5.61855	5.46367	5.20726	5.01228	5.58409	4.61418	4.96571	5.33719	4.74825	5.16969	5.61855	5.46367	5.20726	5.01228	5.58409	4.61418	4.96571	-0.190766	5.17209	-0.876088	0.402509	0.589103	-6.55214	NonSig	1	Single-promoter
1079	ENSG00000109133	TMEM33	chr4	41935137	+	FALSE	1	FB-PB.3709.2,FB-PB.3709.1	6.37427	6.37427	6.19339	6.19339	Major	Major	7.31017	6.47849	6.30495	5.86659	5.91115	6.49689	6.17341	6.1814	6.22258	5.89265	7.31017	6.47849	6.30495	5.86659	5.91115	6.49689	6.17341	6.1814	6.22258	5.89265	-0.180885	6.28383	-0.671989	0.517537	0.689463	-6.71466	NonSig	1	Single-promoter
1080	ENSG00000109171	SLAIN2	chr4	48341469	+	FALSE	1	FB-PB.3716.1,FB-PB.3716.3	4.3447	4.3447	4.50792	4.50792	Major	Major	3.85205	4.84763	4.65688	3.83923	4.52771	4.81916	4.85989	4.49963	4.84609	3.51481	3.85205	4.84763	4.65688	3.83923	4.52771	4.81916	4.85989	4.49963	4.84609	3.51481	0.163218	4.42631	0.516237	0.617445	0.769672	-6.81228	NonSig	1	Single-promoter
1081	ENSG00000109184	DCUN1D4	chr4	51843131	+	FALSE	1	FB-PB.3718.1,FB-PB.3718.2	3.89443	3.89443	3.70344	3.70344	Major	Major	3.31619	3.26684	4.60463	4.28044	4.00406	4.11587	3.26711	3.992	4.08887	3.05334	3.31619	3.26684	4.60463	4.28044	4.00406	4.11587	3.26711	3.992	4.08887	3.05334	-0.190995	3.79894	-0.579676	0.57557	0.735273	-6.77539	NonSig	1	Single-promoter
1082	ENSG00000109270	LAMTOR3	chr4	99894430	-	FALSE	1	FB-PB.3795.1,FB-PB.3795.2	4.43736	4.43736	3.9763	3.9763	Major	Major	4.97568	4.6415	4.37437	3.49064	4.70461	2.68841	4.62789	4.7197	4.08887	3.75666	4.97568	4.6415	4.37437	3.49064	4.70461	2.68841	4.62789	4.7197	4.08887	3.75666	-0.461056	4.20683	-1.10118	0.297835	0.489687	-6.33155	NonSig	1	Single-promoter
1083	ENSG00000109320	NFKB1	chr4	102501326	+	FALSE	1	FB-PB.3804.1	5.83371	5.83371	5.69103	5.69103	Major	Major	6.30296	5.91693	4.31056	6.63386	6.00427	5.51277	5.56594	6.38817	5.04584	5.94244	6.30296	5.91693	4.31056	6.63386	6.00427	5.51277	5.56594	6.38817	5.04584	5.94244	-0.142683	5.76237	-0.331798	0.747218	0.857705	-6.89625	NonSig	1	Single-promoter
1084	ENSG00000109323	MANBA	chr4	102760982	-	FALSE	1	FB-PB.3802.1,FB-PB.3802.2	4.04877	4.04877	2.99874	2.99874	Major	Major	5.05559	4.18988	3.31801	4.35453	3.32583	4.02226	3.55876	2.24119	3.54569	1.62578	5.05559	4.18988	3.31801	4.35453	3.32583	4.02226	3.55876	2.24119	3.54569	1.62578	-1.05003	3.52375	-2.01372	0.0731032	0.201528	-5.1094	NonSig	1	Single-promoter
1085	ENSG00000109332	UBE2D3	chr4	102827208	-	TRUE	2	FB-PB.3803.2,FB-PB.3803.1,FB-PB.3803.4	8.7206	13.7723	8.68724	13.4809	NA	NA	8.52151	8.95837	8.31578	9.09222	8.71513	8.71542	8.83996	8.97162	8.48665	8.42257	13.6155	13.9863	12.6901	14.2955	14.274	14.1211	13.5294	14.2017	12.8243	12.7282	-0.0333595	8.70392	-0.182887	0.858716	0.932238	-6.93789	NonSig	2	Multiple-promoter
1086	ENSG00000109332	UBE2D3	chr4	102828064	-	FALSE	1	FB-PB.3803.3	5.05168	13.7723	4.7937	13.4809	Minor	Minor	5.09395	5.02796	4.37437	5.20328	5.55883	5.40564	4.68948	5.23009	4.3377	4.30559	13.6155	13.9863	12.6901	14.2955	14.274	14.1211	13.5294	14.2017	12.8243	12.7282	-0.257976	4.92269	-0.903676	0.388423	0.577111	-6.52734	NonSig	2	Multiple-promoter
1087	ENSG00000109381	ELF2	chr4	139177233	-	FALSE	1	FB-PB.3839.1	4.49745	4.49745	3.27918	3.27918	Major	Major	5.09395	4.74825	4.10024	4.73343	3.81138	3.57192	2.67627	3.20184	2.88882	4.05708	5.09395	4.74825	4.10024	4.73343	3.81138	3.57192	2.67627	3.20184	2.88882	4.05708	-1.21826	3.88832	-3.76574	0.00400913	0.0302802	-2.22554	DownReg	1	Single-promoter
1089	ENSG00000109436	TBC1D9	chr4	140756361	-	FALSE	1	FB-PB.3845.1	4.17385	4.17385	5.08448	5.08448	Major	Major	4.24189	3.94257	3.94079	4.28044	4.46357	5.28991	4.62789	4.98041	5.37765	5.14651	4.24189	3.94257	3.94079	4.28044	4.46357	5.28991	4.62789	4.98041	5.37765	5.14651	0.910626	4.62916	5.17287	0.000485922	0.00831372	-0.0446006	NonSig	1	Single-promoter
1090	ENSG00000109501	WFS1	chr4	6269852	+	FALSE	1	FB-PB.3677.1,FB-PB.3677.2	3.75041	3.75041	3.98523	3.98523	Major	Major	3.44047	4.46494	3.18199	3.49064	4.17402	3.81459	4.68948	4.49963	3.54569	3.37677	3.44047	4.46494	3.18199	3.49064	4.17402	3.81459	4.68948	4.49963	3.54569	3.37677	0.234819	3.86782	0.696561	0.5027	0.67567	-6.69712	NonSig	1	Single-promoter
1091	ENSG00000109586	GALNT7	chr4	173168764	+	FALSE	1	FB-PB.3886.1,FB-PB.3886.2,FB-PB.3886.3,FB-PB.3886.4	2.64955	2.64955	3.00841	3.00841	Major	Major	2.6727	2.75493	3.0318	3.20045	1.58785	2.91365	3.42029	3.77344	2.88882	2.04584	2.6727	2.75493	3.0318	3.20045	1.58785	2.91365	3.42029	3.77344	2.88882	2.04584	0.358861	2.82898	0.940268	0.370284	0.559384	-6.49344	NonSig	1	Single-promoter
1092	ENSG00000109606	DHX15	chr4	24584542	-	FALSE	1	FB-PB.3689.1	6.96223	6.96223	7.26618	7.26618	Major	Major	6.95136	7.70713	6.63954	6.66331	6.84979	7.32214	7.19558	7.27923	7.29365	7.2403	6.95136	7.70713	6.63954	6.66331	6.84979	7.32214	7.19558	7.27923	7.29365	7.2403	0.303955	7.1142	1.52222	0.160396	0.328506	-5.82166	NonSig	1	Single-promoter
1093	ENSG00000109680	TBC1D19	chr4	26584070	+	FALSE	1	FB-PB.3694.1	2.98031	2.98031	2.86244	2.86244	Major	Major	2.19665	3.75048	0.923938	3.93892	4.09154	1.6683	3.68509	2.80004	3.78798	2.37077	2.19665	3.75048	0.923938	3.93892	4.09154	1.6683	3.68509	2.80004	3.78798	2.37077	-0.11787	2.92137	-0.173736	0.865705	0.934662	-6.93968	NonSig	1	Single-promoter
1094	ENSG00000109686	SH3D19	chr4	151227965	-	FALSE	1	FB-PB.3861.1	4.24582	4.24582	3.18846	3.18846	Major	Major	2.8624	3.75048	4.43547	4.89111	5.28963	1.6683	3.42029	3.20184	3.78798	3.8639	2.8624	3.75048	4.43547	4.89111	5.28963	1.6683	3.42029	3.20184	3.78798	3.8639	-1.05735	3.71714	-1.94291	0.0820994	0.21793	-5.21775	NonSig	1	Single-promoter
1095	ENSG00000109762	SNX25	chr4	185210063	+	FALSE	1	FB-PB.3895.1	1.3535	1.3535	1.86032	1.86032	Major	Major	0	2.27306	1.88435	1.60792	1.00217	0	2.08243	1.69453	2.88882	2.63581	0	2.27306	1.88435	1.60792	1.00217	0	2.08243	1.69453	2.88882	2.63581	0.506818	1.60691	0.847628	0.417409	0.602361	-6.57704	NonSig	1	Single-promoter
1096	ENSG00000109805	NCAPG	chr4	17810974	+	FALSE	1	FB-PB.3686.2,FB-PB.3686.3	0.605397	0.605397	3.54746	3.54746	Major	Major	0	1.54436	1.48263	0	0	4.28662	2.08243	4.18175	3.54569	3.6408	0	1.54436	1.48263	0	0	4.28662	2.08243	4.18175	3.54569	3.6408	2.94206	2.07643	5.84815	0.000195047	0.00452187	0.902516	UpReg	1	Single-promoter
1097	ENSG00000109814	UGDH	chr4	39527566	-	FALSE	1	FB-PB.3702.1,FB-PB.3702.2,FB-PB.3702.3,FB-PB.3702.4,FB-PB.3702.5,FB-PB.3702.6	6.54079	6.54079	6.97823	6.97823	Major	Major	6.65047	5.84659	6.35325	6.7619	7.09177	6.6766	6.78029	7.38597	6.80798	7.2403	6.65047	5.84659	6.35325	6.7619	7.09177	6.6766	6.78029	7.38597	6.80798	7.2403	0.437434	6.75951	1.77046	0.108539	0.256617	-5.47436	NonSig	1	Single-promoter
1098	ENSG00000109906	ZBTB16	chr11	114059594	+	FALSE	1	FB-PB.1039.1,FB-PB.1039.3	6.78806	7.29424	3.48636	3.48636	Major	Major	7.36609	5.82236	7.23694	6.28178	7.23313	4.20377	4.62789	2.63669	4.3377	1.62578	8.28908	5.82236	7.23694	7.88969	7.23313	4.20377	4.62789	2.63669	4.3377	1.62578	-3.30169	5.13721	-5.42585	0.000342608	0.00639209	0.318061	DownReg	2	Multiple-promoter
1099	ENSG00000109906	ZBTB16	chr11	114059885	+	FALSE	2	FB-PB.1039.4	0.50618	7.29424	0	3.48636	Minor	Inactive	0.922984	0	0	1.60792	0	0	0	0	0	0	8.28908	5.82236	7.23694	7.88969	7.23313	4.20377	4.62789	2.63669	4.3377	1.62578	-0.50618	0.25309	-1.61713	0.138402	0.295792	-5.69233	NonSig	2	Multiple-promoter
1100	ENSG00000109920	FNBP4	chr11	47767314	-	FALSE	1	FB-PB.915.1	0	0	0	0	Inactive	Inactive	0	0	0	0	0	0	0	0	0	0	0	0	0	0	0	0	0	0	0	0	0	0	0	1	1	-6.95617	NonSig	1	Single-promoter
1101	ENSG00000110046	ATG2A	chr11	64917209	-	FALSE	1	FB-PB.949.1	4.69404	4.69404	4.54768	4.54768	Major	Major	4.70536	4.7988	4.89303	4.425	4.64802	4.57732	4.27298	4.59173	4.84609	4.45028	4.70536	4.7988	4.89303	4.425	4.64802	4.57732	4.27298	4.59173	4.84609	4.45028	-0.146361	4.62086	-1.02955	0.328625	0.520116	-6.40614	NonSig	1	Single-promoter
1102	ENSG00000110047	EHD1	chr11	64878621	-	FALSE	1	FB-PB.948.1,FB-PB.948.2	6.81687	6.81687	6.54536	6.54536	Major	Major	7.50066	6.92783	5.46172	7.31948	6.87466	6.72197	6.48267	6.71946	6.28317	6.51956	7.50066	6.92783	5.46172	7.31948	6.87466	6.72197	6.48267	6.71946	6.28317	6.51956	-0.271506	6.68112	-0.78026	0.454167	0.63658	-6.63314	NonSig	1	Single-promoter
1103	ENSG00000110060	PUS3	chr11	125903198	-	FALSE	1	FB-PB.1068.1,FB-PB.1068.2	1.02508	1.02508	1.57111	1.57111	Major	Major	0	0	0.923938	2.6136	1.58785	2.42137	0	1.31681	2.07153	2.04584	0	0	0.923938	2.6136	1.58785	2.42137	0	1.31681	2.07153	2.04584	0.546033	1.29809	0.895558	0.392531	0.579471	-6.5347	NonSig	1	Single-promoter
1104	ENSG00000110075	PPP6R3	chr11	68460732	+	FALSE	1	FB-PB.976.1,FB-PB.976.2,FB-PB.976.3	5.46224	5.46224	5.473	5.473	Major	Major	5.33719	5.29773	5.33916	5.84104	5.49609	5.24918	5.2759	5.93997	5.51874	5.38124	5.33719	5.29773	5.33916	5.84104	5.49609	5.24918	5.2759	5.93997	5.51874	5.38124	0.0107594	5.46762	0.0628013	0.951221	0.988089	-6.95402	NonSig	1	Single-promoter
1105	ENSG00000110092	CCND1	chr11	69641111	+	FALSE	1	FB-PB.978.1,FB-PB.978.5,FB-PB.978.3,FB-PB.978.2	6.07461	12.0901	6.31445	11.7545	Major	Major	6.35126	6.74657	5.54725	5.91636	5.81161	6.209	6.55063	6.1814	6.61717	6.01404	13.5862	13.1454	11.3478	11.1977	11.1734	12.085	12.4906	11.495	12.3824	10.3196	0.239836	6.19453	1.00916	0.337817	0.529267	-6.42665	NonSig	2	Multiple-promoter
1106	ENSG00000110092	CCND1	chr11	69648056	+	TRUE	2	FB-PB.978.6	6.01547	12.0901	5.44007	11.7545	NA	NA	7.23494	6.3988	5.8005	5.28133	5.36178	5.87597	5.93994	5.3136	5.76523	4.30559	13.5862	13.1454	11.3478	11.1977	11.1734	12.085	12.4906	11.495	12.3824	10.3196	-0.575402	5.72777	-1.29945	0.224321	0.407649	-6.10562	NonSig	2	Multiple-promoter
1108	ENSG00000110171	TRIM3	chr11	6473905	-	FALSE	1	FB-PB.835.1	3.97852	3.97852	3.2086	3.2086	Major	Major	4.70536	3.75048	3.94079	4.49218	3.00379	3.57192	3.55876	2.45245	3.08311	3.37677	4.70536	3.75048	3.94079	4.49218	3.00379	3.57192	3.55876	2.45245	3.08311	3.37677	-0.769921	3.59356	-2.22851	0.0512134	0.160011	-4.772	NonSig	1	Single-promoter
1109	ENSG00000110218	PANX1	chr11	94128876	+	FALSE	1	FB-PB.1005.1	5.21046	5.21046	5.62027	5.62027	Major	Major	5.27178	5.82236	3.66274	6.20375	5.09167	5.36809	5.59841	6.29535	4.99844	5.84108	5.27178	5.82236	3.66274	6.20375	5.09167	5.36809	5.59841	6.29535	4.99844	5.84108	0.409813	5.41537	0.903129	0.388699	0.577126	-6.52783	NonSig	1	Single-promoter
1110	ENSG00000110315	RNF141	chr11	10541187	-	FALSE	1	FB-PB.852.1,FB-PB.852.2	3.23624	3.23624	3.67092	3.67092	Major	Major	3.03003	4.11206	2.19823	2.8368	4.00406	4.28662	4.00877	3.92276	3.08311	3.05334	3.03003	4.11206	2.19823	2.8368	4.00406	4.28662	4.00877	3.92276	3.08311	3.05334	0.434685	3.45358	1.0483	0.320341	0.512542	-6.387	NonSig	1	Single-promoter
1111	ENSG00000110321	EIF4G2	chr11	10805976	-	TRUE	3	FB-PB.853.6	9.39951	29.1025	9.67737	28.9358	NA	NA	9.29924	10.0182	8.74183	9.60979	9.32851	9.74151	9.59658	9.88969	9.54568	9.61339	30.24	30.502	27.8633	28.7459	28.1613	29.3734	29.1873	28.9465	29.6379	27.534	0.277858	9.53844	1.27542	0.232352	0.416828	-6.13444	NonSig	3	Multiple-promoter
1112	ENSG00000110321	EIF4G2	chr11	10806880	-	TRUE	2	FB-PB.853.5	9.38405	29.1025	9.32235	28.9358	NA	NA	9.84881	9.80446	9.09658	9.12169	9.04872	9.36148	9.37081	9.2705	9.50386	9.10509	30.24	30.502	27.8633	28.7459	28.1613	29.3734	29.1873	28.9465	29.6379	27.534	-0.0617038	9.3532	-0.313574	0.760595	0.867528	-6.90262	NonSig	3	Multiple-promoter
1113	ENSG00000110321	EIF4G2	chr11	10808955	-	FALSE	1	FB-PB.853.1,FB-PB.853.3,FB-PB.853.2,FB-PB.853.4	10.3189	29.1025	9.93611	28.9358	Major	Major	11.092	10.6793	10.0249	10.0144	9.78405	10.2704	10.2199	9.78629	10.5884	8.81555	30.24	30.502	27.8633	28.7459	28.1613	29.3734	29.1873	28.9465	29.6379	27.534	-0.38283	10.1275	-1.03398	0.326651	0.517935	-6.40164	NonSig	3	Multiple-promoter
1114	ENSG00000110330	BIRC2	chr11	102347237	+	TRUE	1	FB-PB.1020.2,FB-PB.1020.3,FB-PB.1020.4	7.59881	7.59881	7.62537	7.62537	NA	NA	7.24349	7.71373	7.19338	7.87335	7.9701	7.51489	7.4833	7.88176	7.68658	7.56032	7.24349	7.71373	7.19338	7.87335	7.9701	7.51489	7.4833	7.88176	7.68658	7.56032	0.0265588	7.61209	0.144721	0.887944	0.949499	-6.94472	NonSig	1	Single-promoter
1115	ENSG00000110344	UBE4A	chr11	118359613	+	FALSE	1	FB-PB.1047.1	4.59266	4.59266	5.1762	5.1762	Major	Major	4.30864	4.0298	5.09591	4.61784	4.91108	5.28991	5.46388	5.39254	4.67574	5.05894	4.30864	4.0298	5.09591	4.61784	4.91108	5.28991	5.46388	5.39254	4.67574	5.05894	0.583549	4.88443	2.46217	0.0346291	0.123666	-4.39354	NonSig	1	Single-promoter
1116	ENSG00000110367	DDX6	chr11	118790948	-	FALSE	1	FB-PB.1049.1	4.12552	4.12552	3.8805	3.8805	Major	Major	3.66089	4.18988	4.37437	3.93892	4.46357	3.10843	4.27298	3.85003	3.25432	4.91673	3.66089	4.18988	4.37437	3.93892	4.46357	3.10843	4.27298	3.85003	3.25432	4.91673	-0.245028	4.00301	-0.711489	0.493816	0.668678	-6.68618	NonSig	1	Single-promoter
1117	ENSG00000110422	HIPK3	chr11	33257356	+	FALSE	1	FB-PB.887.1	6.20115	6.20115	5.79645	5.79645	Major	Major	6.41324	5.93963	6.47467	5.96448	6.21373	5.79338	5.93994	6.04144	5.90032	5.30716	6.41324	5.93963	6.47467	5.96448	6.21373	5.79338	5.93994	6.04144	5.90032	5.30716	-0.404701	5.9988	-2.27426	0.047448	0.151632	-4.6987	NonSig	1	Single-promoter
1118	ENSG00000110435	PDHX	chr11	34916651	+	FALSE	1	FB-PB.892.1	3.86072	3.86072	4.33176	4.33176	Major	Major	2.8624	4.58502	3.0318	4.11976	4.70461	4.11587	4.42556	4.18175	4.17667	4.75895	2.8624	4.58502	3.0318	4.11976	4.70461	4.11587	4.42556	4.18175	4.17667	4.75895	0.471045	4.09624	1.23797	0.245334	0.430627	-6.17858	NonSig	1	Single-promoter
1119	ENSG00000110583	NAA40	chr11	63939002	+	FALSE	1	FB-PB.943.1	2.01149	2.01149	2.19451	2.19451	Major	Major	1.48133	2.94647	2.45587	0	3.17378	2.68841	1.65846	1.69453	2.07153	2.85963	1.48133	2.94647	2.45587	0	3.17378	2.68841	1.65846	1.69453	2.07153	2.85963	0.183022	2.103	0.31269	0.761246	0.867528	-6.90292	NonSig	1	Single-promoter
1120	ENSG00000110660	SLC35F2	chr11	107859208	-	FALSE	1	FB-PB.1024.1,FB-PB.1024.2	4.16567	4.16567	3.59182	3.59182	Major	Major	4.65494	5.46358	3.18199	3.93892	3.58894	3.81459	2.40969	3.41852	4.08887	4.22742	4.65494	5.46358	3.18199	3.93892	3.58894	3.81459	2.40969	3.41852	4.08887	4.22742	-0.573857	3.87875	-1.18584	0.264389	0.453933	-6.23845	NonSig	1	Single-promoter
1121	ENSG00000110713	NUP98	chr11	3797528	-	FALSE	1	FB-PB.827.1	5.62159	5.62159	5.48368	5.48368	Major	Major	6.12917	5.66776	4.65688	6.22365	5.4305	5.28991	5.56594	5.67111	5.34012	5.55133	6.12917	5.66776	4.65688	6.22365	5.4305	5.28991	5.56594	5.67111	5.34012	5.55133	-0.137911	5.55264	-0.491935	0.633891	0.784207	-6.82534	NonSig	1	Single-promoter
1122	ENSG00000110717	NDUFS8	chr11	68030673	+	FALSE	1	FB-PB.973.1	4.24589	4.24589	5.73488	5.73488	Major	Major	4.70536	4.52623	3.7615	4.425	3.81138	5.97921	5.77926	5.53854	5.48474	5.89265	4.70536	4.52623	3.7615	4.425	3.81138	5.97921	5.77926	5.53854	5.48474	5.89265	1.48899	4.99039	6.89246	5.35972e-05	0.00205876	2.23881	UpReg	1	Single-promoter
1123	ENSG00000110768	GTF2H1	chr11	18322547	+	FALSE	1	FB-PB.868.1,FB-PB.868.2,FB-PB.868.3	5.52016	5.52016	5.36022	5.36022	Major	Major	4.6027	5.96199	5.65394	5.73408	5.64811	5.02622	5.42819	5.60634	5.55195	5.18838	4.6027	5.96199	5.65394	5.73408	5.64811	5.02622	5.42819	5.60634	5.55195	5.18838	-0.159944	5.44019	-0.629371	0.543887	0.71174	-6.74372	NonSig	1	Single-promoter
1125	ENSG00000110851	PRDM4	chr12	107761137	-	FALSE	1	FB-PB.1321.1,FB-PB.1321.2	4.10526	4.10526	3.8006	3.8006	Major	Major	4.37244	3.64391	4.55042	3.20045	4.75906	4.7033	3.90873	3.60687	3.40734	3.37677	4.37244	3.64391	4.55042	3.20045	4.75906	4.7033	3.90873	3.60687	3.40734	3.37677	-0.304653	3.95293	-0.843977	0.419348	0.603661	-6.58018	NonSig	1	Single-promoter
1126	ENSG00000110880	CORO1C	chr12	108731518	-	FALSE	1	FB-PB.1327.1,FB-PB.1327.2	5.52099	5.52099	6.10899	6.10899	Major	Major	5.7751	5.4319	5.20522	5.86659	5.32616	6.00391	5.80731	6.28159	5.67766	6.77448	5.7751	5.4319	5.20522	5.86659	5.32616	6.00391	5.80731	6.28159	5.67766	6.77448	0.587997	5.81499	2.5475	0.030002	0.114353	-4.2532	NonSig	1	Single-promoter
1127	ENSG00000110906	KCTD10	chr12	109477300	-	FALSE	1	FB-PB.1329.1	5.32465	5.32465	5.50963	5.50963	Major	Major	4.97568	4.89487	5.4908	5.73408	5.5278	5.90248	4.80529	5.97459	5.22127	5.64453	4.97568	4.89487	5.4908	5.73408	5.5278	5.90248	4.80529	5.97459	5.22127	5.64453	0.184984	5.41714	0.694651	0.503844	0.676512	-6.6985	NonSig	1	Single-promoter
1128	ENSG00000110911	SLC11A2	chr12	51026378	-	FALSE	1	FB-PB.1181.2,FB-PB.1181.3,FB-PB.1181.4	2.99052	2.99052	2.40713	2.40713	Major	Major	3.85205	1.54436	3.18199	3.20045	3.17378	3.28001	3.42029	1.69453	0	3.6408	3.85205	1.54436	3.18199	3.20045	3.17378	3.28001	3.42029	1.69453	0	3.6408	-0.583399	2.69883	-0.798098	0.444232	0.627433	-6.61868	NonSig	1	Single-promoter
1129	ENSG00000110917	MLEC	chr12	120687145	+	FALSE	1	FB-PB.1366.1,FB-PB.1366.2,FB-PB.1366.3	4.26391	4.26391	5.0613	5.0613	Major	Major	5.27178	3.11553	3.94079	4.9874	4.00406	4.87378	5.10561	5.047	5.09174	5.18838	5.27178	3.11553	3.94079	4.9874	4.00406	4.87378	5.10561	5.047	5.09174	5.18838	0.797392	4.66261	2.15508	0.0578704	0.172616	-4.88867	NonSig	1	Single-promoter
1130	ENSG00000110931	CAMKK2	chr12	121296753	-	FALSE	1	FB-PB.1369.2,FB-PB.1369.3,FB-PB.1369.4,FB-PB.1369.1	4.34485	4.34485	3.89495	3.89495	Major	Major	3.44047	4.58502	4.70731	4.9874	4.00406	4.28662	4.56355	3.07993	3.78798	3.75666	3.44047	4.58502	4.70731	4.9874	4.00406	4.28662	4.56355	3.07993	3.78798	3.75666	-0.449904	4.1199	-1.26602	0.235557	0.421041	-6.14561	NonSig	1	Single-promoter
1131	ENSG00000110987	BCL7A	chr12	122021946	+	FALSE	1	FB-PB.1374.1	3.86386	3.86386	4.22638	4.22638	Major	Major	0	4.26371	5.01815	5.03323	5.0042	4.36497	3.42029	4.12123	4.41194	4.81348	0	4.26371	5.01815	5.03323	5.0042	4.36497	3.42029	4.12123	4.41194	4.81348	0.362525	4.04512	0.392613	0.703237	0.830007	-6.87246	NonSig	1	Single-promoter
1132	ENSG00000111011	RSRC2	chr12	122526949	-	FALSE	1	FB-PB.1376.1	6.21303	6.21303	6.56644	6.56644	Major	Major	5.65196	5.87042	6.41523	6.74822	6.37932	6.29156	6.59958	6.6136	6.48583	6.84162	5.65196	5.87042	6.41523	6.74822	6.37932	6.29156	6.59958	6.6136	6.48583	6.84162	0.353405	6.38973	1.62473	0.136762	0.293608	-5.68178	NonSig	1	Single-promoter
1133	ENSG00000111142	METAP2	chr12	95474114	+	FALSE	1	FB-PB.1288.1	6.11586	6.11586	6.54215	6.54215	Major	Major	5.67745	6.44714	6.51769	6.09988	5.83715	6.66116	6.21589	6.47537	6.41539	6.94294	5.67745	6.44714	6.51769	6.09988	5.83715	6.66116	6.21589	6.47537	6.41539	6.94294	0.426291	6.329	2.05806	0.0679544	0.191131	-5.04076	NonSig	1	Single-promoter
1134	ENSG00000111145	ELK3	chr12	96194371	+	FALSE	1	FB-PB.1290.1,FB-PB.1290.2,FB-PB.1290.3,FB-PB.1290.4,FB-PB.1290.5,FB-PB.1290.6	7.66554	15.1252	7.90034	15.3641	Major	Major	8.06135	7.51641	7.36024	7.8155	7.57417	7.73738	8.01534	7.86801	8.36109	7.5199	15.8752	14.6254	14.7362	15.2333	15.1559	15.1545	15.5994	15.452	16.1764	14.4382	0.23481	7.78294	1.22179	0.251127	0.438465	-6.19737	NonSig	2	Multiple-promoter
1135	ENSG00000111145	ELK3	chr12	96223682	+	TRUE	2	FB-PB.1290.7	7.45966	15.1252	7.46373	15.3641	NA	NA	7.81383	7.10901	7.37592	7.4178	7.58174	7.41714	7.58403	7.58396	7.81527	6.91827	15.8752	14.6254	14.7362	15.2333	15.1559	15.1545	15.5994	15.452	16.1764	14.4382	0.00407475	7.4617	0.0209253	0.983737	1	-6.95594	NonSig	2	Multiple-promoter
1136	ENSG00000111206	FOXM1	chr12	2877077	-	FALSE	1	FB-PB.1094.1	1.15465	1.15465	3.8195	3.8195	Major	Major	2.8624	0.969653	0.923938	1.01725	0	4.02226	4.62789	4.18175	2.88882	3.37677	2.8624	0.969653	0.923938	1.01725	0	4.02226	4.62789	4.18175	2.88882	3.37677	2.66485	2.48707	5.134	0.000513142	0.00855529	-0.10116	UpReg	1	Single-promoter
1138	ENSG00000111269	CREBL2	chr12	12611845	+	FALSE	1	FB-PB.1114.1,FB-PB.1114.2	4.75414	4.75414	4.08326	4.08326	Major	Major	4.75408	5.11032	4.31056	4.89111	4.70461	4.11587	4.74855	3.992	3.25432	4.30559	4.75408	5.11032	4.31056	4.89111	4.70461	4.11587	4.74855	3.992	3.25432	4.30559	-0.670871	4.4187	-2.50269	0.0323492	0.119341	-4.327	NonSig	1	Single-promoter
1139	ENSG00000111271	ACAD10	chr12	111686076	+	FALSE	1	FB-PB.1342.1	2.5985	2.5985	1.5673	1.5673	Major	Major	4.49216	2.27306	2.19823	2.0258	2.00325	2.68841	1.05547	1.69453	2.3981	0	4.49216	2.27306	2.19823	2.0258	2.00325	2.68841	1.05547	1.69453	2.3981	0	-1.0312	2.0829	-1.64267	0.132961	0.287655	-5.65676	NonSig	1	Single-promoter
1140	ENSG00000111300	NAA25	chr12	112108784	-	FALSE	1	FB-PB.1346.1	3.23336	3.23336	4.17803	4.17803	Major	Major	3.18019	4.11206	3.94079	1.60792	3.32583	3.81459	3.80124	4.63566	3.99538	4.64328	3.18019	4.11206	3.94079	1.60792	3.32583	3.81459	3.80124	4.63566	3.99538	4.64328	0.944673	3.70569	2.09689	0.0637308	0.184007	-4.98019	NonSig	1	Single-promoter
1141	ENSG00000111358	GTF2H3	chr12	123633809	+	FALSE	1	FB-PB.1382.1,FB-PB.1382.2	3.19159	3.19159	4.00546	4.00546	Major	Major	2.6727	3.64391	4.02271	3.03005	2.58858	4.36497	3.42029	3.77344	4.08887	4.37975	2.6727	3.64391	4.02271	3.03005	2.58858	4.36497	3.42029	3.77344	4.08887	4.37975	0.813876	3.59853	2.56168	0.0292949	0.113027	-4.22979	NonSig	1	Single-promoter
1142	ENSG00000111371	SLC38A1	chr12	46204333	-	TRUE	4	FB-PB.1162.12	5.54956	21.0688	5.25314	19.4961	NA	NA	5.95257	6.44714	5.01815	5.28133	5.0486	6.27135	5.35406	4.83725	5.22127	4.58177	21.9291	25.6748	18.2371	20.1641	19.339	20.9133	20.5757	17.6063	20.5115	17.8737	-0.296417	5.40135	-0.782096	0.453137	0.635886	-6.63167	NonSig	4	Multiple-promoter
1143	ENSG00000111371	SLC38A1	chr12	46229210	-	TRUE	3	FB-PB.1162.11	5.2898	21.0688	4.71518	19.4961	NA	NA	5.13131	6.6397	4.60463	4.67679	5.39655	4.9264	5.10561	4.23984	4.99844	4.30559	21.9291	25.6748	18.2371	20.1641	19.339	20.9133	20.5757	17.6063	20.5115	17.8737	-0.574621	5.00249	-1.48817	0.169006	0.340095	-5.86691	NonSig	4	Multiple-promoter
1144	ENSG00000111371	SLC38A1	chr12	46239700	-	TRUE	2	FB-PB.1162.10	5.68956	21.0688	5.48958	19.4961	NA	NA	5.67745	6.69412	5.05755	5.58816	5.4305	5.79338	6.10725	5.11065	5.67766	4.75895	21.9291	25.6748	18.2371	20.1641	19.339	20.9133	20.5757	17.6063	20.5115	17.8737	-0.19998	5.58957	-0.57816	0.576552	0.735777	-6.77632	NonSig	4	Multiple-promoter
1145	ENSG00000111371	SLC38A1	chr12	46269114	-	FALSE	1	FB-PB.1162.8,FB-PB.1162.5,FB-PB.1162.3,FB-PB.1162.7,FB-PB.1162.2,FB-PB.1162.6,FB-PB.1162.13	4.53991	21.0688	4.03821	19.4961	Minor	Minor	5.16773	5.89386	3.55673	4.61784	3.46337	3.92216	4.00877	3.41852	4.61418	4.22742	21.9291	25.6748	18.2371	20.1641	19.339	20.9133	20.5757	17.6063	20.5115	17.8737	-0.501698	4.28906	-1.06363	0.313686	0.506187	-6.37114	NonSig	4	Multiple-promoter
1146	ENSG00000111424	VDR	chr12	47905025	-	FALSE	1	FB-PB.1166.2,FB-PB.1166.1	3.0876	3.0876	2.17444	2.17444	Major	Major	3.55488	2.94647	3.31801	3.03005	2.58858	3.10843	2.67627	1.9936	1.04808	2.04584	3.55488	2.94647	3.31801	3.03005	2.58858	3.10843	2.67627	1.9936	1.04808	2.04584	-0.913155	2.63102	-2.50607	0.0321661	0.118893	-4.32145	NonSig	1	Single-promoter
1147	ENSG00000111450	STX2	chr12	130839199	-	FALSE	1	FB-PB.1390.1,FB-PB.1390.2	3.75742	3.75742	4.04123	4.04123	Major	Major	3.03003	3.64391	4.2438	4.28044	3.58894	3.57192	4.10232	3.77344	4.17667	4.58177	3.03003	3.64391	4.2438	4.28044	3.58894	3.57192	4.10232	3.77344	4.17667	4.58177	0.283803	3.89932	1.01433	0.335468	0.527434	-6.42148	NonSig	1	Single-promoter
1148	ENSG00000111530	CAND1	chr12	67269357	+	FALSE	1	FB-PB.1241.1,FB-PB.1241.2,FB-PB.1241.3,FB-PB.1241.4,FB-PB.1241.5,FB-PB.1241.6	6.08256	6.08256	6.34244	6.34244	Major	Major	6.30296	6.38232	6.13116	5.89169	5.70469	6.09868	6.31693	6.08962	6.50292	6.70406	6.30296	6.38232	6.13116	5.89169	5.70469	6.09868	6.31693	6.08962	6.50292	6.70406	0.259876	6.2125	1.43648	0.182847	0.356948	-5.93438	NonSig	1	Single-promoter
1149	ENSG00000111540	RAB5B	chr12	55974083	+	FALSE	1	FB-PB.1198.1	2.35443	2.35443	2.24066	2.24066	Major	Major	2.45422	2.27306	1.88435	2.34943	2.81107	3.43334	2.67627	0.803701	2.66422	1.62578	2.45422	2.27306	1.88435	2.34943	2.81107	3.43334	2.67627	0.803701	2.66422	1.62578	-0.113765	2.29754	-0.251968	0.806412	0.896827	-6.92153	NonSig	1	Single-promoter
1151	ENSG00000111581	NUP107	chr12	68686983	+	FALSE	1	FB-PB.1242.1,FB-PB.1242.2,FB-PB.1242.3	4.14941	4.14941	4.74987	4.74987	Major	Major	3.03003	4.46494	4.60463	4.11976	4.52771	4.20377	4.96325	5.2863	4.48255	4.81348	3.03003	4.46494	4.60463	4.11976	4.52771	4.20377	4.96325	5.2863	4.48255	4.81348	0.600456	4.44964	1.82161	0.0999701	0.244955	-5.39941	NonSig	1	Single-promoter
1152	ENSG00000111596	CNOT2	chr12	70242882	+	FALSE	1	FB-PB.1251.1,FB-PB.1251.2,FB-PB.1251.4	5.02668	5.02668	5.21143	5.21143	Major	Major	4.84684	4.52623	4.89303	5.16261	5.70469	5.11957	4.91249	5.53854	5.17937	5.30716	4.84684	4.52623	4.89303	5.16261	5.70469	5.11957	4.91249	5.53854	5.17937	5.30716	0.184747	5.11905	0.832696	0.425377	0.609598	-6.58982	NonSig	1	Single-promoter
1153	ENSG00000111602	TIMELESS	chr12	56449426	-	FALSE	1	FB-PB.1207.1	0.701685	0.701685	2.98208	2.98208	Major	Major	0	0	1.48263	2.0258	0	3.28001	3.55876	2.94676	2.07153	3.05334	0	0	1.48263	2.0258	0	3.28001	3.55876	2.94676	2.07153	3.05334	2.28039	1.84188	4.84733	0.000772185	0.0109221	-0.525075	UpReg	1	Single-promoter
1155	ENSG00000111615	KRR1	chr12	75511633	-	FALSE	1	FB-PB.1256.1,FB-PB.1256.2,FB-PB.1256.3	5.5785	5.5785	5.34115	5.34115	Major	Major	5.09395	6.00568	5.09591	5.64831	6.04866	5.51277	5.3916	5.01409	5.30158	5.48568	5.09395	6.00568	5.09591	5.64831	6.04866	5.51277	5.3916	5.01409	5.30158	5.48568	-0.237357	5.45982	-1.05044	0.319402	0.511745	-6.38479	NonSig	1	Single-promoter
1156	ENSG00000111642	CHD4	chr12	6607451	-	FALSE	1	FB-PB.1099.1,FB-PB.1099.2	4.0015	4.0015	3.7416	3.7416	Major	Major	4.65494	4.33395	4.49409	2.6136	3.91094	4.50995	3.42029	3.92276	3.99538	2.85963	4.65494	4.33395	4.49409	2.6136	3.91094	4.50995	3.42029	3.92276	3.99538	2.85963	-0.259903	3.87155	-0.600715	0.562033	0.726268	-6.76228	NonSig	1	Single-promoter
1157	ENSG00000111667	USP5	chr12	6852135	+	FALSE	1	FB-PB.1098.2,FB-PB.1098.3	3.73319	3.73319	4.25895	4.25895	Major	Major	4.37244	3.52883	4.10024	3.49064	3.17378	3.69835	3.90873	4.23984	4.25943	5.18838	4.37244	3.52883	4.10024	3.49064	3.17378	3.69835	3.90873	4.23984	4.25943	5.18838	0.525762	3.99607	1.64423	0.132635	0.287394	-5.65458	NonSig	1	Single-promoter
1158	ENSG00000111670	GNPTAB	chr12	101830861	-	FALSE	1	FB-PB.1303.1	4.13236	4.13236	4.36649	4.36649	Major	Major	5.16773	4.11206	3.7615	3.61643	4.00406	4.20377	4.62789	4.12123	4.73479	4.14476	5.16773	4.11206	3.7615	3.61643	4.00406	4.20377	4.62789	4.12123	4.73479	4.14476	0.234131	4.24942	0.805942	0.439909	0.62335	-6.61223	NonSig	1	Single-promoter
1159	ENSG00000111711	GOLT1B	chr12	21501789	+	FALSE	1	FB-PB.1125.1,FB-PB.1125.2	5.26527	5.26527	6.54044	6.54044	Major	Major	4.09833	5.4319	5.37079	5.58816	5.83715	6.54816	6.39295	6.34912	6.69357	6.71843	4.09833	5.4319	5.37079	5.58816	5.83715	6.54816	6.39295	6.34912	6.69357	6.71843	1.27518	5.90286	4.27107	0.00181991	0.0183466	-1.41249	UpReg	1	Single-promoter
1161	ENSG00000111737	RAB35	chr12	120116753	-	FALSE	1	FB-PB.1360.1	5.21702	5.21702	4.93421	4.93421	Major	Major	5.23792	5.52492	5.01815	4.84044	5.46367	4.20377	5.23517	5.46739	4.89868	4.86603	5.23792	5.52492	5.01815	4.84044	5.46367	4.20377	5.23517	5.46739	4.89868	4.86603	-0.282811	5.07561	-1.15416	0.276535	0.467528	-6.27389	NonSig	1	Single-promoter
1162	ENSG00000111785	RIC8B	chr12	106774596	+	FALSE	1	FB-PB.1316.1	2.78918	2.78918	2.55389	2.55389	Major	Major	4.54849	3.52883	3.0318	2.8368	0	3.10843	2.40969	1.9936	2.3981	2.85963	4.54849	3.52883	3.0318	2.8368	0	3.10843	2.40969	1.9936	2.3981	2.85963	-0.235295	2.67154	-0.325974	0.751483	0.861414	-6.89832	NonSig	1	Single-promoter
1163	ENSG00000111790	FGFR1OP2	chr12	26938435	+	FALSE	1	FB-PB.1137.1,FB-PB.1137.2	6.14032	6.14032	5.3741	5.3741	Major	Major	6.14752	6.3988	6.25497	6.22365	5.67668	5.16408	5.49871	5.46739	5.8743	4.86603	6.14752	6.3988	6.25497	6.22365	5.67668	5.16408	5.49871	5.46739	5.8743	4.86603	-0.766224	5.75721	-3.63668	0.00493094	0.0344375	-2.43751	NonSig	1	Single-promoter
1165	ENSG00000111817	DSE	chr6	116370926	+	FALSE	1	FB-PB.4353.1	6.1213	11.8517	6.3479	12.3399	Major	Major	6.20121	6.12934	5.70447	6.28178	6.28968	6.61381	6.31693	6.49935	5.8743	6.43513	11.661	11.9998	11.4089	12.403	11.7858	12.642	11.8496	13.269	11.6109	12.3278	0.226606	6.2346	1.28571	0.228884	0.414386	-6.12214	NonSig	2	Multiple-promoter
1166	ENSG00000111817	DSE	chr6	116433344	+	TRUE	2	FB-PB.4353.2	5.7304	11.8517	5.99196	12.3399	NA	NA	5.45974	5.87042	5.70447	6.12126	5.49609	6.02819	5.53271	6.76961	5.73663	5.89265	11.661	11.9998	11.4089	12.403	11.7858	12.642	11.8496	13.269	11.6109	12.3278	0.261563	5.86118	1.08996	0.302504	0.494456	-6.34349	NonSig	2	Multiple-promoter
1167	ENSG00000111845	PAK1IP1	chr6	10694925	+	FALSE	1	FB-PB.4197.1	4.17329	4.17329	4.32051	4.32051	Major	Major	5.13131	4.26371	4.43547	4.03217	3.00379	4.02226	4.35129	4.34943	4.73479	4.14476	5.13131	4.26371	4.43547	4.03217	3.00379	4.02226	4.35129	4.34943	4.73479	4.14476	0.147214	4.2469	0.425395	0.679988	0.812997	-6.85803	NonSig	1	Single-promoter
1168	ENSG00000111860	CEP85L	chr6	118651642	-	FALSE	1	FB-PB.4357.1	4.77854	4.77854	4.09003	4.09003	Major	Major	4.97568	4.7988	5.27374	4.84044	4.00406	3.92216	4.4962	3.31424	4.41194	4.30559	4.97568	4.7988	5.27374	4.84044	4.00406	3.92216	4.4962	3.31424	4.41194	4.30559	-0.688514	4.43429	-2.36953	0.0404545	0.136521	-4.54474	NonSig	1	Single-promoter
1169	ENSG00000111880	RNGTT	chr6	88963618	-	FALSE	1	FB-PB.4312.1,FB-PB.4312.2	4.0567	4.0567	3.45483	3.45483	Major	Major	5.09395	3.64391	3.94079	3.35283	4.25204	3.10843	4.10232	4.12123	2.88882	3.05334	5.09395	3.64391	3.94079	3.35283	4.25204	3.10843	4.10232	4.12123	2.88882	3.05334	-0.601874	3.75576	-1.585	0.145527	0.305724	-5.73662	NonSig	1	Single-promoter
1170	ENSG00000111897	SERINC1	chr6	122456564	-	TRUE	2	FB-PB.4360.2	9.06273	17.5021	8.46087	16.5832	NA	NA	8.84476	8.89007	9.15224	9.27503	9.15153	8.03567	8.38001	9.0013	8.34697	8.54042	16.6528	17.3758	17.6473	17.9817	17.8528	15.8449	16.3339	17.3958	16.4185	16.923	-0.601852	8.7618	-3.25165	0.00924345	0.0516596	-3.07732	NonSig	2	Multiple-promoter
1171	ENSG00000111897	SERINC1	chr6	122471807	-	FALSE	1	FB-PB.4360.1,FB-PB.4360.3	8.43937	17.5021	8.12234	16.5832	Minor	Minor	7.80808	8.48572	8.4951	8.70664	8.70129	7.8092	7.95392	8.3945	8.07152	8.38255	16.6528	17.3758	17.6473	17.9817	17.8528	15.8449	16.3339	17.3958	16.4185	16.923	-0.317028	8.28085	-1.55235	0.153101	0.317717	-5.7811	NonSig	2	Multiple-promoter
1172	ENSG00000111911	HINT3	chr6	125956756	+	FALSE	1	FB-PB.4359.1	3.88565	3.88565	3.41425	3.41425	Major	Major	3.44047	3.75048	3.55673	4.35453	4.32605	2.91365	3.80124	2.94676	3.54569	3.8639	3.44047	3.75048	3.55673	4.35453	4.32605	2.91365	3.80124	2.94676	3.54569	3.8639	-0.471403	3.64995	-1.73672	0.114555	0.264482	-5.52321	NonSig	1	Single-promoter
1174	ENSG00000112031	MTRF1L	chr6	152995264	-	TRUE	2	FB-PB.4401.9	4.47317	8.85385	4.87887	9.67879	NA	NA	4.49216	5.18823	4.49409	4.28044	3.91094	4.81916	4.85989	5.36671	4.48255	4.86603	8.51298	10.258	7.8121	9.52327	8.16297	10.0264	9.9655	10.045	8.47793	9.87911	0.405697	4.67602	1.64834	0.131781	0.285986	-5.64883	NonSig	2	Multiple-promoter
1175	ENSG00000112031	MTRF1L	chr6	153002718	-	FALSE	1	FB-PB.4401.4,FB-PB.4401.7,FB-PB.4401.5,FB-PB.4401.8,FB-PB.4401.3,FB-PB.4401.6	4.38068	8.85385	4.79992	9.67879	Minor	Minor	4.02082	5.06973	3.31801	5.24283	4.25204	5.20726	5.10561	4.67829	3.99538	5.01308	8.51298	10.258	7.8121	9.52327	8.16297	10.0264	9.9655	10.045	8.47793	9.87911	0.419238	4.5903	1.07295	0.30969	0.501183	-6.36141	NonSig	2	Multiple-promoter
1176	ENSG00000112033	PPARD	chr6	35342548	+	FALSE	1	FB-PB.4231.1,FB-PB.4231.2	4.71226	4.71226	4.65666	4.65666	Major	Major	3.9389	4.74825	4.43547	5.73408	4.70461	4.81916	4.91249	4.75996	4.41194	4.37975	3.9389	4.74825	4.43547	5.73408	4.70461	4.81916	4.91249	4.75996	4.41194	4.37975	-0.055599	4.68446	-0.185622	0.856629	0.931121	-6.93734	NonSig	1	Single-promoter
1177	ENSG00000112062	MAPK14	chr6	36027808	+	FALSE	1	FB-PB.4232.1	5.09544	5.09544	5.17766	5.17766	Major	Major	4.6027	5.26215	4.75603	5.4258	5.4305	5.11957	5.23517	5.25847	5.26198	5.01308	4.6027	5.26215	4.75603	5.4258	5.4305	5.11957	5.23517	5.25847	5.26198	5.01308	0.0822201	5.13655	0.439502	0.670089	0.80789	-6.85148	NonSig	1	Single-promoter
1178	ENSG00000112078	KCTD20	chr6	36443000	+	FALSE	1	FB-PB.4235.1,FB-PB.4235.2,FB-PB.4235.3	3.81051	3.81051	3.72508	3.72508	Major	Major	4.80121	2.27306	4.02271	4.49218	3.46337	3.92216	3.55876	3.77344	3.40734	3.96372	4.80121	2.27306	4.02271	4.49218	3.46337	3.92216	3.55876	3.77344	3.40734	3.96372	-0.0854234	3.7678	-0.199259	0.846244	0.925621	-6.93448	NonSig	1	Single-promoter
1179	ENSG00000112079	STK38	chr6	36547456	-	FALSE	1	FB-PB.4236.1	5.1638	5.1638	4.11303	4.11303	Major	Major	5.43007	5.18823	5.09591	4.89111	5.21367	3.69835	4.19017	3.77344	4.84609	4.05708	5.43007	5.18823	5.09591	4.89111	5.21367	3.69835	4.19017	3.77344	4.84609	4.05708	-1.05077	4.63841	-4.75049	0.000888875	0.012009	-0.670963	DownReg	1	Single-promoter
1180	ENSG00000112118	MCM3	chr6	52284742	-	FALSE	1	FB-PB.4263.1	4.88185	4.88185	6.09466	6.09466	Major	Major	5.62602	3.84972	4.37437	5.16261	5.39655	6.02819	5.91437	6.38817	5.70744	6.43513	5.62602	3.84972	4.37437	5.16261	5.39655	6.02819	5.91437	6.38817	5.70744	6.43513	1.21281	5.48826	3.54598	0.00570962	0.0381095	-2.58735	UpReg	1	Single-promoter
1181	ENSG00000112186	CAP2	chr6	17393643	+	FALSE	1	FB-PB.4199.1	1.75177	1.75177	1.43916	1.43916	Major	Major	2.6727	0	0.923938	2.8368	2.3254	0	2.08243	1.69453	1.04808	2.37077	2.6727	0	0.923938	2.8368	2.3254	0	2.08243	1.69453	1.04808	2.37077	-0.312604	1.59546	-0.486126	0.637853	0.787369	-6.82838	NonSig	1	Single-promoter
1182	ENSG00000112200	ZNF451	chr6	57090076	+	FALSE	1	FB-PB.4275.1,FB-PB.4275.2,FB-PB.4275.3,FB-PB.4275.4,FB-PB.4275.5	4.02717	4.02717	4.02649	4.02649	Major	Major	3.9389	3.84972	4.89303	4.28044	3.17378	4.57732	3.80124	4.63566	3.25432	3.8639	3.9389	3.84972	4.89303	4.28044	3.17378	4.57732	3.80124	4.63566	3.25432	3.8639	-0.000685281	4.02683	-0.00189769	0.998525	1	-6.95617	NonSig	1	Single-promoter
1183	ENSG00000112208	BAG2	chr6	57172634	+	FALSE	1	FB-PB.4277.1	3.29942	3.29942	3.75512	3.75512	Major	Major	2.8624	3.26684	3.66274	2.6136	4.09154	2.91365	4.10232	4.34943	3.8954	3.51481	2.8624	3.26684	3.66274	2.6136	4.09154	2.91365	4.10232	4.34943	3.8954	3.51481	0.455699	3.52727	1.31553	0.219078	0.40152	-6.08613	NonSig	1	Single-promoter
1184	ENSG00000112210	RAB23	chr6	57222319	-	FALSE	1	FB-PB.4281.1,FB-PB.4281.2	4.49872	4.49872	5.25793	5.25793	Major	Major	4.80121	4.46494	4.43547	4.78793	4.00406	5.11957	5.66125	4.98041	5.22127	5.30716	4.80121	4.46494	4.43547	4.78793	4.00406	5.11957	5.66125	4.98041	5.22127	5.30716	0.759212	4.87833	3.98048	0.00285429	0.0246324	-1.87649	NonSig	1	Single-promoter
1185	ENSG00000112242	E2F3	chr6	20403545	+	FALSE	1	FB-PB.4205.1	3.04293	3.04293	3.88913	3.88913	Major	Major	3.55488	3.40377	3.31801	2.34943	2.58858	3.57192	4.74855	3.41852	4.48255	3.2241	3.55488	3.40377	3.31801	2.34943	2.58858	3.57192	4.74855	3.41852	4.48255	3.2241	0.846194	3.46603	2.31331	0.0444489	0.145247	-4.6358	NonSig	1	Single-promoter
1186	ENSG00000112245	PTP4A1	chr6	63572481	+	FALSE	1	FB-PB.4280.1,FB-PB.4280.2,FB-PB.4280.3	7.83746	7.83746	7.97578	7.97578	Major	Major	7.81383	8.40236	7.46653	8.1427	7.36186	8.24697	7.86996	8.12463	7.81527	7.82208	7.81383	8.40236	7.46653	8.1427	7.36186	8.24697	7.86996	8.12463	7.81527	7.82208	0.138326	7.90662	0.640304	0.537054	0.705862	-6.73643	NonSig	1	Single-promoter
1187	ENSG00000112249	ASCC3	chr6	100647453	-	FALSE	1	FB-PB.4320.1	4.50485	4.50485	5.38921	5.38921	Major	Major	4.97568	5.11032	4.1738	3.61643	4.64802	5.40564	5.42819	5.2863	5.51874	5.30716	4.97568	5.11032	4.1738	3.61643	4.64802	5.40564	5.42819	5.2863	5.51874	5.30716	0.884356	4.94703	3.28939	0.00868552	0.0498972	-3.01423	NonSig	1	Single-promoter
1188	ENSG00000112282	MED23	chr6	131628228	-	FALSE	1	FB-PB.4365.1	3.36276	3.36276	3.23525	3.23525	Major	Major	3.18019	2.94647	4.02271	3.49064	3.17378	3.92216	2.67627	2.94676	3.25432	3.37677	3.18019	2.94647	4.02271	3.49064	3.17378	3.92216	2.67627	2.94676	3.25432	3.37677	-0.127505	3.29901	-0.469031	0.649585	0.794527	-6.83711	NonSig	1	Single-promoter
1189	ENSG00000112290	WASF1	chr6	110179919	-	FALSE	1	FB-PB.4344.1	0.184788	0.184788	0.41576	0.41576	Inactive	Major	0	0	0.923938	0	0	0	0	0	1.04808	1.03072	0	0	0.923938	0	0	0	0	0	1.04808	1.03072	0.230972	0.300274	0.7675	0.461363	0.64191	-6.64331	NonSig	1	Single-promoter
1190	ENSG00000112339	HBS1L	chr6	135054819	-	FALSE	1	FB-PB.4370.1	4.77034	4.77034	5.19995	5.19995	Major	Major	3.44047	5.58376	5.33916	4.67679	4.81154	5.79338	4.96325	5.20114	4.73479	5.30716	3.44047	5.58376	5.33916	4.67679	4.81154	5.79338	4.96325	5.20114	4.73479	5.30716	0.429601	4.98515	1.10865	0.294753	0.486988	-6.32354	NonSig	1	Single-promoter
1191	ENSG00000112343	TRIM38	chr6	25962818	+	FALSE	1	FB-PB.4209.1	4.06574	4.06574	2.3204	2.3204	Major	Major	3.75963	4.0298	4.02271	4.425	4.09154	2.91365	2.40969	1.9936	3.25432	1.03072	3.75963	4.0298	4.02271	4.425	4.09154	2.91365	2.40969	1.9936	3.25432	1.03072	-1.74534	3.19307	-4.61606	0.00108309	0.0136011	-0.875703	DownReg	1	Single-promoter
1192	ENSG00000112365	ZBTB24	chr6	109483239	-	FALSE	1	FB-PB.4339.1	2.56113	2.56113	2.11813	2.11813	Major	Major	0	2.27306	3.85393	3.35283	3.32583	2.42137	2.90118	1.9936	1.64871	1.62578	0	2.27306	3.85393	3.35283	3.32583	2.42137	2.90118	1.9936	1.64871	1.62578	-0.442999	2.33963	-0.655538	0.527617	0.697437	-6.72609	NonSig	1	Single-promoter
1193	ENSG00000112367	FIG4	chr6	109691297	+	FALSE	1	FB-PB.4340.1	3.80304	3.80304	3.62629	3.62629	Major	Major	5.7513	3.40377	4.43547	2.6136	2.81107	2.91365	3.42029	3.60687	4.54987	3.6408	5.7513	3.40377	4.43547	2.6136	2.81107	2.91365	3.42029	3.60687	4.54987	3.6408	-0.176748	3.71467	-0.298891	0.771434	0.873044	-6.90749	NonSig	1	Single-promoter
1194	ENSG00000112419	PHACTR2	chr6	143677992	+	FALSE	1	FB-PB.4381.1	5.493	5.493	4.74943	4.74943	Major	Major	5.7271	5.26215	5.40174	5.67747	5.39655	4.64169	4.96325	4.59173	4.79152	4.75895	5.7271	5.26215	5.40174	5.67747	5.39655	4.64169	4.96325	4.59173	4.79152	4.75895	-0.743576	5.12121	-5.57829	0.000278768	0.00580964	0.532047	NonSig	1	Single-promoter
1195	ENSG00000112531	QKI	chr6	163415138	+	FALSE	1	FB-PB.4424.1	8.04715	8.04715	8.1872	8.1872	Major	Major	7.88665	8.17248	7.58588	8.31496	8.27578	7.9301	8.14191	8.49332	8.10547	8.26517	7.88665	8.17248	7.58588	8.31496	8.27578	7.9301	8.14191	8.49332	8.10547	8.26517	0.140045	8.11717	0.798893	0.443792	0.627201	-6.61803	NonSig	1	Single-promoter
1196	ENSG00000112640	PPP2R5D	chr6	42984589	+	FALSE	1	FB-PB.4249.1	4.86221	4.86221	4.6844	4.6844	Major	Major	4.43354	4.69586	5.27374	5.20328	4.70461	4.57732	4.80529	4.18175	5.34012	4.51753	4.43354	4.69586	5.27374	5.20328	4.70461	4.57732	4.80529	4.18175	5.34012	4.51753	-0.177804	4.7733	-0.723921	0.486491	0.663905	-6.67692	NonSig	1	Single-promoter
[truncated: 2,785 more rows]

## Sheet: Table S9.2
Table S9.2 Functional enrichment of Multi-Promoter genes in FBs (related to Fig. 5C)
State	ID	Description	GeneRatio	BgRatio	pvalue	p.adjust	qvalue	geneID	Count
[truncated: 84 more rows]

## Sheet: Table S9.3
Table S9.3 GO terms for shifted promoter genes in FBs (related Figure 5F)
[truncated: 125 more rows]

[truncated: 1 more sheets: Table S9.4]
