# Supplementary material
Source: Research Square preprint supplement (doi:10.21203/rs.3.rs-9917999/v1)
Supplement: Supplementary file 10 [file c10f6a9226ccab1acf9a9980.xlsx]

## Sheet: Table S1
Table S1. Donor information
Donors	Sex	Age (years)	Ethinity	Sample types	Cell isolation	Experiments
1	M	56	Caucasian	/	FB	PacBio Iso-Seq
2	F	39	Caucasian	/	KC	PacBio Iso-Seq
3	M	27	Caucasian	Skin	KC	RNA-seq, small RNA-seq
					FB
				Day 7 Wound	KC
					FB
4	M	33	Caucasian	Skin	KC
					FB
				Day 7 Wound	KC
					FB
5	F	36	Caucasian	Skin	KC
					FB
				Day 7 Wound	KC
					FB
6	M	25	Caucasian	Skin	KC
					FB
				Day 7 Wound	KC
					FB
7	F	38	Caucasian	Skin	KC
					FB
				Day 7 Wound	KC
					FB
8	M	36	Caucasian	Skin	/	Smart-seq2 scRNA-seq (PMID: 34536485.)
				Day 7 Wound	/
9	M	46	Caucasian	Skin	/
				Day 7 Wound	/
10	M	27	Caucasian	Skin	/
				Day 7 Wound	/
11	M	62	Caucasian	Skin	/
				Day 7 Wound	/
12	M	24	Caucasian	Skin	/	10X scRNA-seq (PMID: 39729995)
				Day 1 Wound	/
				Day 7 Wound	/
				Day 30 Wound	/
13	F	22	Caucasian	Skin	/
				Day 1 Wound	/
				Day 7 Wound	/
				Day 30 Wound	/
14	M	29	Caucasian	Skin	/
				Day 1 Wound	/
				Day 7 Wound	/
				Day 30 Wound	/
FB: Fibroblasts; KC: Keratinocytes; M: Male; F: Female
