# Supplementary material
Source: Research Square preprint supplement (doi:10.21203/rs.3.rs-9917999/v1)
Supplement: Supplementary file 11 [file c3aa27e652e2eee27b47ec86.xlsx]

## Sheet: Table S4.1
Table S4.1 GO enrichment analysis of genes associated with upregulated isoforms in fibroblasts.
ID	Description	GeneRatio	BgRatio	pvalue	p.adjust	qvalue	geneID	Count
GO:0000819	sister chromatid segregation	19/150	225/18870	1.84275e-14	4.91646e-11	4.12388e-11	RACGAP1/KIF2C/BUB1B/KNL1/KIF23/PRC1/SPAG5/TOP2A/LSM14A/NCAPH/TPX2/TACC3/NCAPG/TTK/CENPF/KIF4A/HNRNPU/KIF11/KIF18A	19
GO:0051656	establishment of organelle localization	19/150	469/18870	6.25238e-09	1.66813e-06	1.39922e-06	RACGAP1/KIF2C/HIF1A/KNL1/SPAG5/HGS/MAP1S/LRPPRC/XPO1/ITGA4/LMNA/SDAD1/ABCE1/KIFAP3/LMNB1/CENPF/HNRNPU/ITGB1/KIF18A	19
GO:0140694	non-membrane-bounded organelle assembly	17/150	408/18870	2.76478e-08	6.14704e-06	5.15608e-06	RACGAP1/KIF23/PRC1/CNOT1/USP10/SPAG5/PRKAR1A/LSM14A/EIF5B/TPX2/DHX30/CENPF/KIF4A/HNRNPU/ITGB1/KIF11/CAPRIN1	17
GO:0051983	regulation of chromosome segregation	10/150	131/18870	9.45212e-08	1.68122e-05	1.41019e-05	KIF2C/BUB1B/KNL1/NCAPH/TACC3/NCAPG/TTK/CDCA2/CENPF/HNRNPU	10
GO:0044772	mitotic cell cycle phase transition	16/150	470/18870	1.09191e-06	0.0001617	0.000135632	FOXM1/BCAT1/BUB1B/KNL1/RFWD3/ADAM17/RRM2/APP/EIF4G1/TACC3/CCNA2/TTK/INHBA/DTL/CENPF/ITGB1	16
GO:0007018	microtubule-based movement	15/150	420/18870	1.33611e-06	0.00016975	0.000142384	KIF2C/KTN1/HIF1A/KIF23/MAP1S/LRPPRC/APP/KIFAP3/KIF20A/DST/DNAAF5/KIF4A/HNRNPU/KIF11/KIF18A	15
GO:0022411	cellular component disassembly	16/150	497/18870	2.25412e-06	0.000261478	0.000219325	KIF2C/HIF1A/ADAM10/TOP2A/MAP1S/FAP/TPX2/ABCE1/MTRF1L/ASPH/VCP/ITGB1/ADD3/SWAP70/MICAL2/KIF18A	16
GO:0090068	positive regulation of cell cycle process	11/150	262/18870	8.14223e-06	0.000775838	0.000650766	RACGAP1/KIF23/SPAG5/ADAM17/RRM2/NCAPH/APP/EIF4G1/NCAPG/DTL/HNRNPU	11
GO:2001251	negative regulation of chromosome organization	7/150	94/18870	1.00083e-05	0.000920768	0.000772332	HNRNPC/BUB1B/KNL1/TOP2A/TTK/CENPF/HNRNPU	7
GO:0070828	heterochromatin organization	7/150	100/18870	1.50426e-05	0.00133779	0.00112212	HMGB1/UHRF1/DNMT1/LMNA/LMNB1/HP1BP3/HELLS	7
GO:0031503	protein-containing complex localization	9/150	188/18870	1.98172e-05	0.00170556	0.00143061	NUMB/ADAM10/XPO1/LMNA/SDAD1/ABCE1/LMNB1/HNRNPU/AP2A2	9
GO:0017015	regulation of transforming growth factor beta receptor signaling pathway	8/150	160/18870	4.25746e-05	0.00310184	0.0026018	THBS1/GLG1/ADAM17/LTBP1/FBN2/CD109/ENG/MEN1	8
GO:0007405	neuroblast proliferation	6/150	81/18870	4.53417e-05	0.00310184	0.0026018	RACGAP1/HIF1A/NUMB/PLXNB2/KIFAP3/ITGB1	6
GO:0031507	heterochromatin formation	6/150	91/18870	8.72543e-05	0.00517321	0.00433924	HMGB1/UHRF1/DNMT1/LMNA/LMNB1/HELLS	6
GO:0001666	response to hypoxia	10/150	298/18870	0.000138707	0.00786749	0.00659918	HSP90B1/HIF1A/THBS1/DDAH1/NPEPPS/ADAM17/LMNA/PLOD2/CCNA2/HP1BP3	10
GO:0071897	DNA biosynthetic process	8/150	194/18870	0.000163662	0.00845971	0.00709593	HNRNPC/USP10/CCNA2/DTL/CENPF/VCP/HNRNPU/MEN1	8
GO:0045814	negative regulation of gene expression, epigenetic	6/150	120/18870	0.000396019	0.0160088	0.013428	HMGB1/UHRF1/DNMT1/LMNA/LMNB1/HELLS	6
GO:0045936	negative regulation of phosphate metabolic process	10/150	376/18870	0.000866631	0.0243386	0.020415	PRKAR1A/EIF4G1/NNT/CD109/INHBA/ENG/HNRNPU/IPO7/SWAP70/MEN1	10
GO:0007409	axonogenesis	11/150	448/18870	0.000925262	0.0249091	0.0208935	APLP2/NUMB/USP33/MAP1S/ADAM17/ITGA4/APP/PLXNB2/ALCAM/ITGB1/EIF4G2	11
GO:0045727	positive regulation of translation	6/150	141/18870	0.000927187	0.0249091	0.0208935	THBS1/PLXNB2/EIF4G1/SYNCRIP/HNRNPU/EIF4G2	6
GO:0055001	muscle cell development	7/150	195/18870	0.000958566	0.0253213	0.0212393	ACTN1/PRKAR1A/LMNA/SGCB/ENG/HNRNPU/ITGB1	7
GO:0006898	receptor-mediated endocytosis	8/150	258/18870	0.00108592	0.0259682	0.0217819	NUMB/HGS/LDLR/ITGA4/SCARB2/HMMR/ITGB1/AP2A2	8
GO:0031331	positive regulation of cellular catabolic process	10/150	396/18870	0.00128014	0.0279953	0.0234822	HMGB1/HIF1A/CNOT1/PNPT1/RAB3GAP1/APP/NNT/SYNCRIP/HNRNPU/CAPRIN1	10
GO:0032963	collagen metabolic process	5/150	106/18870	0.0015798	0.0336225	0.0282022	HIF1A/FAP/INHBA/ENG/ITGB1	5
GO:0007229	integrin-mediated signaling pathway	5/150	111/18870	0.00193577	0.0385421	0.0323288	ITGBL1/ADAM10/ITGA4/DST/ITGB1	5
GO:0071900	regulation of protein serine/threonine kinase activity	8/150	285/18870	0.00203473	0.0402123	0.0337297	THBS1/CEMIP/PRKAR1A/HGS/ADAM17/CCNA2/IPO7/MEN1	8
GO:0042060	wound healing	10/150	423/18870	0.00208093	0.040823	0.0342419	HIF1A/THBS1/LMAN1/ADAM17/FAP/DCBLD2/DST/CD109/ITGB1/PAPSS2	10
GO:0016049	cell growth	11/150	497/18870	0.00210898	0.040987	0.0343795	ADAM10/ADAM17/ITGA4/APP/DCBLD2/ALCAM/EIF4G1/INHBA/TNC/ITGB1/EIF4G2	11
GO:0061351	neural precursor cell proliferation	6/150	166/18870	0.00213538	0.040987	0.0343795	RACGAP1/HIF1A/NUMB/PLXNB2/KIFAP3/ITGB1	6
GO:0034250	positive regulation of amide metabolic process	6/150	169/18870	0.0023359	0.0429806	0.0360518	THBS1/PLXNB2/EIF4G1/SYNCRIP/HNRNPU/EIF4G2	6

## Sheet: Table S4.2
Table S4.2 GO enrichment analysis of genes associated with downregulated isoforms in fibroblasts.
ID	Description	GeneRatio	BgRatio	pvalue	p.adjust	qvalue	geneID	Count
GO:0007178	transmembrane receptor protein serine/threonine kinase signaling pathway	11/99	410/18870	1.01166e-05	0.0138957	0.0115803	WIF1/BMP4/JUN/TGFBR3/LTBP4/WWTR1/RBPJ/FST/RGMB/LOX/GREM2	11
GO:0035051	cardiocyte differentiation	7/99	165/18870	2.60831e-05	0.0138957	0.0115803	TBX3/BMP4/MEF2A/TGFBR3/MAPK1/RBPJ/TBX18	7
GO:0030856	regulation of epithelial cell differentiation	7/99	171/18870	3.27973e-05	0.0138957	0.0115803	TBX3/BMP4/ZFP36L1/WWTR1/FST/CAV1/CCND1	7
GO:0001837	epithelial to mesenchymal transition	7/99	178/18870	4.23655e-05	0.0138957	0.0115803	PHLDB1/TBX3/BMP4/COL1A1/TGFBR3/WWTR1/RBPJ	7
GO:0060485	mesenchyme development	9/99	327/18870	5.56471e-05	0.0138957	0.0115803	PHLDB1/TBX3/BMP4/ZFP36L1/COL1A1/TGFBR3/MAPK1/WWTR1/RBPJ	9
GO:0048762	mesenchymal cell differentiation	8/99	262/18870	7.14598e-05	0.0138957	0.0115803	PHLDB1/TBX3/BMP4/COL1A1/TGFBR3/MAPK1/WWTR1/RBPJ	8
GO:0060828	regulation of canonical Wnt signaling pathway	8/99	262/18870	7.14598e-05	0.0138957	0.0115803	COL1A1/WWTR1/RBPJ/JADE1/G3BP1/TBX18/CAV1/RECK	8
GO:0030111	regulation of Wnt signaling pathway	9/99	338/18870	7.17458e-05	0.0138957	0.0115803	WIF1/COL1A1/WWTR1/RBPJ/JADE1/G3BP1/TBX18/CAV1/RECK	9
GO:0045598	regulation of fat cell differentiation	6/99	146/18870	0.000120065	0.016356	0.0136307	ZBTB16/WIF1/ZFP36L1/ZFP36L2/WWTR1/INSIG1	6
GO:0055006	cardiac cell development	5/99	93/18870	0.000129502	0.016356	0.0136307	TBX3/BMP4/MEF2A/TGFBR3/TBX18	5
GO:0060348	bone development	7/99	215/18870	0.000138609	0.016356	0.0136307	ZBTB16/BMP4/LEPR/COL1A1/GNAS/LOX/INSIG1	7
GO:0198738	cell-cell signaling by wnt	10/99	461/18870	0.000153657	0.016356	0.0136307	WIF1/COL1A1/WWTR1/RBPJ/JADE1/G3BP1/TBX18/CAV1/RECK/CCND1	10
GO:0071559	response to transforming growth factor beta	8/99	293/18870	0.000154859	0.016356	0.0136307	ZFP36L1/JUN/COL1A1/TGFBR3/LTBP4/ZFP36L2/LOX/CAV1	8
GO:0043583	ear development	7/99	221/18870	0.000164273	0.0165617	0.0138021	TBX3/BMP4/MCOLN3/MAPK1/RBPJ/TBX18/INSIG1	7
GO:0071356	cellular response to tumor necrosis factor	7/99	238/18870	0.000258516	0.0209043	0.0174211	ZFP36L1/COL1A1/ACTN4/CYP1B1/ZFP36L2/MAPK1/AKAP12	7
GO:0060070	canonical Wnt signaling pathway	8/99	316/18870	0.000258708	0.0209043	0.0174211	COL1A1/WWTR1/RBPJ/JADE1/G3BP1/TBX18/CAV1/RECK	8
GO:0045445	myoblast differentiation	5/99	110/18870	0.000284301	0.0209043	0.0174211	SMARCC2/TBX3/BMP4/ZFP36L1/RBPJ	5
GO:0030198	extracellular matrix organization	8/99	321/18870	0.000287522	0.0209043	0.0174211	PHLDB1/COL1A1/CYP1B1/ANTXR1/DPP4/LOX/CAV1/RECK	8
GO:0030178	negative regulation of Wnt signaling pathway	6/99	173/18870	0.000301595	0.0209043	0.0174211	WIF1/WWTR1/JADE1/G3BP1/TBX18/CAV1	6
GO:0055001	muscle cell development	6/99	195/18870	0.000569628	0.0250774	0.0208988	TBX3/BMP4/MEF2A/ACTN4/LOX/TBX18	6
GO:0055007	cardiac muscle cell differentiation	5/99	131/18870	0.000633971	0.0260398	0.0217009	TBX3/BMP4/MEF2A/RBPJ/TBX18	5
GO:0030879	mammary gland development	5/99	133/18870	0.000679055	0.0270007	0.0225016	TBX3/BMP4/MAPK1/CAV1/CCND1	5
GO:0090090	negative regulation of canonical Wnt signaling pathway	5/99	140/18870	0.000855939	0.0326052	0.0271723	WWTR1/JADE1/G3BP1/TBX18/CAV1	5
GO:0090092	regulation of transmembrane receptor protein serine/threonine kinase signaling pathway	7/99	297/18870	0.000965501	0.0339918	0.0283278	BMP4/TGFBR3/LTBP4/RBPJ/FST/LOX/GREM2	7
GO:0001666	response to hypoxia	7/99	298/18870	0.000984544	0.0341206	0.0284352	TMBIM6/ZFP36L1/TGFBR3/DPP4/RBPJ/CAV1/UBQLN1	7
GO:0071375	cellular response to peptide hormone stimulus	7/99	310/18870	0.00123701	0.0381123	0.0317618	ZFP36L1/MYO1C/NDEL1/CYP1B1/MAPK1/CAV1/INSIG1	7
GO:0052547	regulation of peptidase activity	7/99	312/18870	0.00128362	0.0383696	0.0319762	DHCR24/TIMP2/FOXL2/CAST/CAV1/RECK/GSN	7
GO:0036293	response to decreased oxygen levels	7/99	315/18870	0.0013561	0.0383696	0.0319762	TMBIM6/ZFP36L1/TGFBR3/DPP4/RBPJ/CAV1/UBQLN1	7
GO:0043588	skin development	7/99	317/18870	0.00140618	0.0383696	0.0319762	DHCR24/ZFP36L1/PPL/COL1A1/TXNIP/RBPJ/FST	7

## Sheet: Table S4.3
Table S4.3 GO enrichment analysis of genes associated with upregulated isoforms in keratinocytes.
ID	Description	GeneRatio	BgRatio	pvalue	p.adjust	qvalue	geneID	Count
GO:0007059	chromosome segregation	24/233	424/18870	5.97753e-10	1.8088e-06	1.65861e-06	SKA3/KIF2C/NDC1/KNL1/TUBGCP4/KIF23/GPSM2/ACTR2/BUB1/ACTR3/SGO2/TPX2/RAD18/ECT2/NCAPG/SRPK1/TTK/CDCA2/SMC2/SMC1A/KIF4A/HNRNPU/MKI67/NCAPD2	24
GO:0140014	mitotic nuclear division	16/233	274/18870	3.2154e-07	0.00048649	0.000446095	KIF2C/KNL1/KIF23/BUB1/TPX2/NCAPG/EPGN/TTK/CAV2/CDCA2/SMC2/SMC1A/KIF4A/HNRNPU/MKI67/NCAPD2	16
GO:0051983	regulation of chromosome segregation	11/233	131/18870	6.94549e-07	0.000588162	0.000539324	KIF2C/KNL1/BUB1/RAD18/NCAPG/TTK/CDCA2/SMC2/HNRNPU/MKI67/NCAPD2	11
GO:0045787	positive regulation of cell cycle	17/233	334/18870	9.38874e-07	0.000588162	0.000539324	KIF23/PAFAH1B1/RRM2/GPSM2/BUB1/ADAMTS1/RAD18/ECT2/NCAPG/EPGN/YTHDC2/DTL/SMC2/HNRNPU/RRM1/CCND1/NCAPD2	17
GO:0090068	positive regulation of cell cycle process	15/233	262/18870	9.71847e-07	0.000588162	0.000539324	KIF23/RRM2/GPSM2/BUB1/ADAMTS1/RAD18/ECT2/NCAPG/EPGN/DTL/SMC2/HNRNPU/RRM1/CCND1/NCAPD2	15
GO:0034470	ncRNA processing	19/233	439/18870	2.40526e-06	0.00096321	0.00088323	TSR1/TYW3/DDX52/STAT3/METTL2A/DDX5/PNPT1/METTL8/NOP14/UTP15/EXOSC10/PUS7/MAK16/NCBP1/HEATR1/GTPBP4/DDX21/NOLC1/YTHDF2	19
GO:0061640	cytoskeleton-dependent cytokinesis	9/233	117/18870	1.48556e-05	0.00408663	0.0037473	CKAP2/KIF23/MYH10/ACTR2/ACTR3/ECT2/EXOC2/SNX9/KIF4A	9
GO:0006898	receptor-mediated endocytosis	13/233	258/18870	2.04484e-05	0.00475977	0.00436454	CAP1/VAC14/CLTC/GRB2/RAB31/LDLR/SCARB2/HMMR/SNX9/CAV2/ITGB1/CTTN/MTMR2	13
GO:1902850	microtubule cytoskeleton organization involved in mitosis	10/233	163/18870	3.60008e-05	0.00726256	0.00665952	KIF23/PAFAH1B1/CLTC/GPSM2/TPX2/TTK/SMC1A/KIF4A/HNRNPU/ITGB1	10
GO:0006260	DNA replication	12/233	278/18870	0.000184897	0.0258618	0.0237143	LIG3/RRM2/MCM6/CCNA2/MCM4/DTL/SET/GTPBP4/MCM10/RRM1/FAM111B/RECQL	12
GO:0050684	regulation of mRNA processing	8/233	129/18870	0.000202636	0.0258618	0.0237143	PAPOLA/DDX5/TIA1/REST/SRPK1/NCBP1/HNRNPU/SRRM1	8
GO:0042254	ribosome biogenesis	13/233	325/18870	0.000212239	0.0258618	0.0237143	SERBP1/TSR1/DDX52/LSG1/NOP14/UTP15/EXOSC10/MAK16/HEATR1/GTPBP4/DDX21/NOLC1/YTHDF2	13

## Sheet: Table S4.4
Table S4.4 GO enrichment analysis of genes associated with downregulated isoforms in keratinocytes.
ID	Description	GeneRatio	BgRatio	pvalue	p.adjust	qvalue	geneID	Count
GO:0006631	fatty acid metabolic process	8/70	401/18870	0.000115851	0.0684294	0.0592264	SCP2/ALOXE3/ACOX1/ACSL3/PNPLA3/INSIG1/FADS2/ADIPOR2	8
GO:0044772	mitotic cell cycle phase transition	8/70	470/18870	0.000340512	0.120678	0.104448	NFIA/ZFP36L2/APP/TOPBP1/CCNI/RAD21/DDX3X/KHDRBS1	8
GO:0006260	DNA replication	6/70	278/18870	0.000576624	0.130021	0.112535	NFIA/BCAR3/TOPBP1/ZBTB38/EREG/NUCKS1	6
GO:1990778	protein localization to cell periphery	6/70	353/18870	0.00196829	0.135312	0.117114	NUMB/GGA2/RAB3D/ACSL3/ATP1B1/LIN7C	6
GO:0042060	wound healing	6/70	423/18870	0.00479545	0.166618	0.14421	AJUBA/BLOC1S6/MYH9/EREG/TNFAIP3/ADIPOR2	6
