# Supplementary material
Source: Research Square preprint supplement (doi:10.21203/rs.3.rs-9917999/v1)
Supplement: Supplementary file 12 [file ce1ea4cc7789940b0d249b06.xlsx]

## Sheet: Table S7.1
Table S7.1 Marker genes identified using the RNA assay across all cell types.
RNA_Gene	p_val	avg_log2FC	pct.1	pct.2	p_val_adj	cluster	gene	GeneName
DMKN	2.05331e-59	2.12848	1	0.994	4.9029e-55	Spinous-cell	DMKN	DMKN
ITGB1	5.65152e-59	-2.21115	0.689	0.94	1.34947e-54	Spinous-cell	ITGB1	ITGB1
SPARC	5.55964e-56	-2.51746	0.564	0.869	1.32753e-51	Spinous-cell	SPARC	SPARC
DSP	1.51437e-50	1.20272	1	0.996	3.61602e-46	Spinous-cell	DSP	DSP
LY6D	9.93551e-48	1.44482	1	0.994	2.3724e-43	Spinous-cell	LY6D	LY6D
TSPAN4	5.87971e-46	-2.38003	0.347	0.712	1.40396e-41	Spinous-cell	TSPAN4	TSPAN4
FTH1	2.88336e-45	-1.45981	0.982	0.998	6.88489e-41	Spinous-cell	FTH1	FTH1
PKP1	8.67762e-45	1.27892	0.994	0.981	2.07204e-40	Spinous-cell	PKP1	PKP1
PERP	1.29513e-44	1.00116	1	1	3.09252e-40	Spinous-cell	PERP	PERP
EMP3	1.57381e-43	-3.33113	0.382	0.712	3.75795e-39	Spinous-cell	EMP3	EMP3
KRTDAP	1.65501e-43	2.80377	0.962	0.909	3.95182e-39	Spinous-cell	KRTDAP	KRTDAP
JUP	5.97318e-43	0.943533	0.998	0.996	1.42628e-38	Spinous-cell	JUP	JUP
CTB-113P19.1	6.26119e-43	-1.74411	0.103	0.461	1.49505e-38	Spinous-cell	CTB-113P19.1	CTB-113P19
SDCBP	3.10565e-41	-2.65091	0.704	0.9	7.41568e-37	Spinous-cell	SDCBP	SDCBP
CTNNAL1	3.26979e-41	-1.31718	0.245	0.614	7.80759e-37	Spinous-cell	CTNNAL1	CTNNAL1
SLC1A4	6.24345e-41	-2.9185	0.348	0.674	1.49081e-36	Spinous-cell	SLC1A4	SLC1A4
CAV1	8.27339e-41	-1.19872	0.906	0.975	1.97552e-36	Spinous-cell	CAV1	CAV1
KRT10	2.79525e-39	2.66039	0.995	0.996	6.6745e-35	Spinous-cell	KRT10	KRT10
PLOD3	4.20023e-39	-3.16032	0.195	0.523	1.00293e-34	Spinous-cell	PLOD3	PLOD3
KRT1	1.98483e-38	2.39721	0.949	0.958	4.73938e-34	Spinous-cell	KRT1	KRT1
DSG1	2.68643e-38	1.54692	0.975	0.954	6.41466e-34	Spinous-cell	DSG1	DSG1
LYPD3	1.17925e-35	1.75797	0.942	0.907	2.81581e-31	Spinous-cell	LYPD3	LYPD3
IFITM3	2.16801e-35	-1.56598	0.934	0.99	5.17678e-31	Spinous-cell	IFITM3	IFITM3
TIMP1	2.51305e-35	-1.59194	0.468	0.736	6.00065e-31	Spinous-cell	TIMP1	TIMP1
DKK3	8.90523e-35	-1.30503	0.541	0.805	2.12639e-30	Spinous-cell	DKK3	DKK3
NOTCH3	6.50715e-34	1.82603	0.871	0.689	1.55378e-29	Spinous-cell	NOTCH3	NOTCH3
SLC43A3	6.67109e-34	-1.87804	0.385	0.68	1.59292e-29	Spinous-cell	SLC43A3	SLC43A3
STMN1	1.5629e-33	-2.5411	0.641	0.83	3.7319e-29	Spinous-cell	STMN1	STMN1
GLTP	3.38422e-33	1.69884	0.914	0.898	8.08084e-29	Spinous-cell	GLTP	GLTP
ALDH3B2	3.54739e-33	2.38332	0.755	0.541	8.47047e-29	Spinous-cell	ALDH3B2	ALDH3B2
SERPINH1	4.71736e-33	-1.94824	0.353	0.647	1.12641e-28	Spinous-cell	SERPINH1	SERPINH1
CDCA7L	1.25007e-32	-1.45563	0.393	0.685	2.98492e-28	Spinous-cell	CDCA7L	CDCA7L
SLC39A13	1.46466e-32	-1.17658	0.465	0.736	3.4973e-28	Spinous-cell	SLC39A13	SLC39A13
LGALS3BP	1.49474e-31	-1.49367	0.69	0.865	3.56913e-27	Spinous-cell	LGALS3BP	LGALS3BP
MATN2	1.53972e-31	-1.51203	0.35	0.67	3.67655e-27	Spinous-cell	MATN2	MATN2
ZNF750	2.16874e-30	1.96322	0.767	0.56	5.17852e-26	Spinous-cell	ZNF750	ZNF750
ARPC1B	7.47827e-30	-1.35358	0.638	0.846	1.78566e-25	Spinous-cell	ARPC1B	ARPC1B
PHLDB1	1.05099e-29	-1.24033	0.255	0.558	2.50955e-25	Spinous-cell	PHLDB1	PHLDB1
PDIA3	1.47845e-29	-0.793513	0.894	0.981	3.53025e-25	Spinous-cell	PDIA3	PDIA3
TMEM184B	2.59116e-29	-1.20496	0.475	0.745	6.18717e-25	Spinous-cell	TMEM184B	TMEM184B
ITGB4	8.60225e-29	-0.933671	0.824	0.915	2.05405e-24	Spinous-cell	ITGB4	ITGB4
FTL	1.25926e-28	-1.48481	0.988	1	3.00687e-24	Spinous-cell	FTL	FTL
SNAI2	2.45411e-28	-1.19692	0.767	0.894	5.85991e-24	Spinous-cell	SNAI2	SNAI2
APOBEC3C	6.14938e-28	-0.717384	0.508	0.77	1.46835e-23	Spinous-cell	APOBEC3C	APOBEC3C
DEFB1	7.2822e-28	1.41883	0.873	0.766	1.73884e-23	Spinous-cell	DEFB1	DEFB1
FAM195B	1.0969e-27	-1.22737	0.434	0.707	2.61919e-23	Spinous-cell	FAM195B	FAM195B
COL17A1	1.30407e-27	-1.22926	0.975	0.985	3.11385e-23	Spinous-cell	COL17A1	COL17A1
ITM2C	1.44493e-27	-2.38322	0.213	0.488	3.45021e-23	Spinous-cell	ITM2C	ITM2C
PDIA3P1	1.72651e-27	-0.787243	0.793	0.946	4.12256e-23	Spinous-cell	PDIA3P1	PDIA3P1
RHOV	2.73398e-27	1.73534	0.791	0.581	6.52819e-23	Spinous-cell	RHOV	RHOV
AKR1B1	4.70753e-27	-1.59212	0.328	0.61	1.12406e-22	Spinous-cell	AKR1B1	AKR1B1
DST	1.38605e-26	-0.757793	0.954	0.983	3.30962e-22	Spinous-cell	DST	DST
FLNA	1.5437e-26	-0.628235	0.894	0.967	3.68604e-22	Spinous-cell	FLNA	FLNA
DSC3	2.11227e-26	0.951525	0.997	0.985	5.04368e-22	Spinous-cell	DSC3	DSC3
ANXA5	2.89654e-26	-1.41878	0.813	0.903	6.91637e-22	Spinous-cell	ANXA5	ANXA5
IFITM2	3.11728e-26	-1.06211	0.558	0.776	7.44345e-22	Spinous-cell	IFITM2	IFITM2
SBSN	6.26759e-26	2.79335	0.819	0.747	1.49658e-21	Spinous-cell	SBSN	SBSN
SLC39A14	1.24294e-25	-1.63244	0.202	0.479	2.96789e-21	Spinous-cell	SLC39A14	SLC39A14
TYMS	1.24766e-25	-3.76975	0.15	0.396	2.97917e-21	Spinous-cell	TYMS	TYMS
PVRL4	1.80832e-25	1.75808	0.738	0.566	4.31792e-21	Spinous-cell	PVRL4	PVRL4
MOXD1	2.01865e-25	-1.7135	0.27	0.535	4.82014e-21	Spinous-cell	MOXD1	MOXD1
PXN	2.09587e-25	-1.40381	0.529	0.747	5.00453e-21	Spinous-cell	PXN	PXN
SNCA	2.41608e-25	-3.10492	0.321	0.566	5.76911e-21	Spinous-cell	SNCA	SNCA
IFITM1	3.59926e-25	-1.96847	0.592	0.78	8.59432e-21	Spinous-cell	IFITM1	IFITM1
ANP32A	3.78612e-25	-0.752633	0.468	0.757	9.0405e-21	Spinous-cell	ANP32A	ANP32A
AP2B1	5.16174e-25	-1.25983	0.437	0.685	1.23252e-20	Spinous-cell	AP2B1	AP2B1
PARK7	9.56047e-25	-0.631635	0.92	0.971	2.28285e-20	Spinous-cell	PARK7	PARK7
H2AFZ	1.087e-24	-1.68649	0.876	0.952	2.59555e-20	Spinous-cell	H2AFZ	H2AFZ
LGALS7B	1.27889e-24	1.14554	0.988	0.973	3.05373e-20	Spinous-cell	LGALS7B	LGALS7B
C11orf24	1.53927e-24	-1.59488	0.382	0.643	3.67546e-20	Spinous-cell	C11orf24	C11orf24
PRKCDBP	1.63488e-24	-1.87665	0.38	0.625	3.90377e-20	Spinous-cell	PRKCDBP	PRKCDBP
TACC1	2.28119e-24	-2.12117	0.184	0.436	5.44703e-20	Spinous-cell	TACC1	TACC1
S100A14	2.81879e-24	0.792251	0.979	0.961	6.7307e-20	Spinous-cell	S100A14	S100A14
ASS1	3.3764e-24	-1.76486	0.474	0.71	8.06216e-20	Spinous-cell	ASS1	ASS1
SLC3A2	3.44499e-24	-1.04437	0.844	0.954	8.22594e-20	Spinous-cell	SLC3A2	SLC3A2
PPT1	5.86494e-24	-0.84245	0.739	0.882	1.40043e-19	Spinous-cell	PPT1	PPT1
BACE2	6.10487e-24	-2.66814	0.322	0.566	1.45772e-19	Spinous-cell	BACE2	BACE2
LRRC8D	7.62238e-24	-0.588451	0.198	0.456	1.82007e-19	Spinous-cell	LRRC8D	LRRC8D
ITGA3	7.6865e-24	-0.827188	0.618	0.801	1.83538e-19	Spinous-cell	ITGA3	ITGA3
SCUBE2	1.24193e-23	-1.2287	0.196	0.463	2.96548e-19	Spinous-cell	SCUBE2	SCUBE2
TUBA1B	1.62564e-23	-1.89097	0.966	0.992	3.88169e-19	Spinous-cell	TUBA1B	TUBA1B
FEZ1	2.08549e-23	-4.04548	0.13	0.353	4.97973e-19	Spinous-cell	FEZ1	FEZ1
TUBB.1	2.13935e-23	-1.35864	0.965	0.99	5.10835e-19	Spinous-cell	TUBB.1	TUBB
TMEM14A	5.32583e-23	-1.07817	0.396	0.66	1.2717e-18	Spinous-cell	TMEM14A	TMEM14A
GJA1	8.14619e-23	1.37582	0.929	0.88	1.94515e-18	Spinous-cell	GJA1	GJA1
PAFAH1B3	1.77396e-22	-0.840588	0.454	0.699	4.23587e-18	Spinous-cell	PAFAH1B3	PAFAH1B3
S100A13	2.34035e-22	-0.983834	0.538	0.757	5.58828e-18	Spinous-cell	S100A13	S100A13
PARP1	2.8279e-22	-1.14126	0.58	0.792	6.75246e-18	Spinous-cell	PARP1	PARP1
CRTAP	3.23735e-22	-0.689264	0.802	0.931	7.73015e-18	Spinous-cell	CRTAP	CRTAP
SIRPA	5.57919e-22	-1.681	0.41	0.653	1.3322e-17	Spinous-cell	SIRPA	SIRPA
CDH13	5.76796e-22	-1.03863	0.474	0.695	1.37727e-17	Spinous-cell	CDH13	CDH13
THBS2	8.52556e-22	-1.95908	0.58	0.749	2.03573e-17	Spinous-cell	THBS2	THBS2
PARVA	1.3301e-21	-1.40469	0.416	0.649	3.17601e-17	Spinous-cell	PARVA	PARVA
PTTG1IP	1.44832e-21	-1.4646	0.821	0.929	3.4583e-17	Spinous-cell	PTTG1IP	PTTG1IP
SLC38A5	1.68227e-21	-0.821833	0.414	0.664	4.01692e-17	Spinous-cell	SLC38A5	SLC38A5
ANP32AP1	1.81197e-21	-1.23903	0.273	0.533	4.32662e-17	Spinous-cell	ANP32AP1	ANP32AP1
CDK2	1.92696e-21	-2.25065	0.515	0.701	4.60119e-17	Spinous-cell	CDK2	CDK2
TRIB2	1.97733e-21	-2.17743	0.156	0.388	4.72148e-17	Spinous-cell	TRIB2	TRIB2
SDHA	2.21648e-21	-0.813364	0.695	0.867	5.2925e-17	Spinous-cell	SDHA	SDHA
TMEM79	3.00219e-21	1.2991	0.885	0.801	7.16863e-17	Spinous-cell	TMEM79	TMEM79
FAM84A	3.40717e-21	1.69615	0.719	0.552	8.13564e-17	Spinous-cell	FAM84A	FAM84A
ANKRD10	3.86769e-21	-0.839224	0.594	0.797	9.23526e-17	Spinous-cell	ANKRD10	ANKRD10
DPYSL2	3.8908e-21	-2.31432	0.351	0.581	9.29045e-17	Spinous-cell	DPYSL2	DPYSL2
HSPG2	4.33266e-21	-1.15429	0.301	0.55	1.03455e-16	Spinous-cell	HSPG2	HSPG2
CNPY3	5.21421e-21	-0.631957	0.433	0.668	1.24505e-16	Spinous-cell	CNPY3	CNPY3
GPX1	5.22359e-21	-0.758875	0.83	0.936	1.24729e-16	Spinous-cell	GPX1	GPX1
FXYD5	5.56121e-21	-1.15518	0.411	0.662	1.32791e-16	Spinous-cell	FXYD5	FXYD5
SEC22C	8.58667e-21	-1.21016	0.456	0.678	2.05032e-16	Spinous-cell	SEC22C	SEC22C
ACSL4	9.69943e-21	-1.09951	0.253	0.49	2.31603e-16	Spinous-cell	ACSL4	ACSL4
HACD3	1.2185e-20	-0.969806	0.56	0.776	2.90954e-16	Spinous-cell	HACD3	HACD3
MCOLN3	1.6313e-20	-5.17315	0.069	0.257	3.89522e-16	Spinous-cell	MCOLN3	MCOLN3
CLDN1	1.82542e-20	0.911373	0.916	0.84	4.35873e-16	Spinous-cell	CLDN1	CLDN1
TMEM98	1.84083e-20	-0.825994	0.235	0.477	4.39554e-16	Spinous-cell	TMEM98	TMEM98
SLC7A5	1.87536e-20	-1.05285	0.426	0.625	4.47798e-16	Spinous-cell	SLC7A5	SLC7A5
BSG	2.42074e-20	-1.03919	0.975	0.994	5.78024e-16	Spinous-cell	BSG	BSG
NPC2	3.50836e-20	-0.764261	0.888	0.971	8.37726e-16	Spinous-cell	NPC2	NPC2
LAMB3	3.87614e-20	-1.76611	0.64	0.776	9.25545e-16	Spinous-cell	LAMB3	LAMB3
EFEMP1	5.11421e-20	-1.19301	0.557	0.745	1.22117e-15	Spinous-cell	EFEMP1	EFEMP1
SLC35B2	5.59365e-20	-1.53102	0.294	0.541	1.33565e-15	Spinous-cell	SLC35B2	SLC35B2
CD63	6.45396e-20	-2.29541	0.946	0.981	1.54108e-15	Spinous-cell	CD63	CD63
CALU	9.44016e-20	-1.38202	0.584	0.766	2.25412e-15	Spinous-cell	CALU	CALU
IFI27L2.1	1.08444e-19	-0.807583	0.729	0.919	2.58943e-15	Spinous-cell	IFI27L2.1	IFI27L2
TGFB1I1	1.0961e-19	-1.62948	0.135	0.353	2.61726e-15	Spinous-cell	TGFB1I1	TGFB1I1
PKMYT1	1.16803e-19	-3.673	0.081	0.272	2.78903e-15	Spinous-cell	PKMYT1	PKMYT1
VEZF1	1.19044e-19	-0.632537	0.466	0.705	2.84254e-15	Spinous-cell	VEZF1	VEZF1
CDIP1.1	1.36558e-19	-0.772751	0.425	0.651	3.26072e-15	Spinous-cell	CDIP1.1	CDIP1
SRPX	1.64123e-19	-2.03508	0.152	0.363	3.91893e-15	Spinous-cell	SRPX	SRPX
KCNK7	1.83939e-19	2.33245	0.607	0.417	4.3921e-15	Spinous-cell	KCNK7	KCNK7
PRKD3	2.07559e-19	-0.878357	0.408	0.645	4.9561e-15	Spinous-cell	PRKD3	PRKD3
PIP4K2A	2.89133e-19	-1.51487	0.311	0.537	6.90392e-15	Spinous-cell	PIP4K2A	PIP4K2A
CTSB	3.46346e-19	-1.13661	0.928	0.973	8.27005e-15	Spinous-cell	CTSB	CTSB
PTRF	3.51477e-19	-0.598566	0.913	0.961	8.39257e-15	Spinous-cell	PTRF	PTRF
KIAA0040	5.6123e-19	-1.61267	0.104	0.301	1.34011e-14	Spinous-cell	KIAA0040	KIAA0040
PTGS1	5.92207e-19	1.66854	0.759	0.631	1.41407e-14	Spinous-cell	PTGS1	PTGS1
MAL2	6.2393e-19	1.49229	0.799	0.697	1.48982e-14	Spinous-cell	MAL2	MAL2
SHCBP1	6.81514e-19	-1.97641	0.087	0.276	1.62732e-14	Spinous-cell	SHCBP1	SHCBP1
SGCB	6.86853e-19	-1.34055	0.233	0.465	1.64007e-14	Spinous-cell	SGCB	SGCB
CHP2	8.46207e-19	2.03273	0.679	0.502	2.02057e-14	Spinous-cell	CHP2	CHP2
HEXA	9.97871e-19	-1.32391	0.48	0.687	2.38272e-14	Spinous-cell	HEXA	HEXA
PACSIN2	1.35212e-18	-0.839938	0.443	0.656	3.2286e-14	Spinous-cell	PACSIN2	PACSIN2
CD320	1.46769e-18	-0.591957	0.198	0.427	3.50455e-14	Spinous-cell	CD320	CD320
TPP1	1.50887e-18	-2.70322	0.686	0.807	3.60287e-14	Spinous-cell	TPP1	TPP1
EID1	1.99794e-18	-1.1519	0.837	0.942	4.77067e-14	Spinous-cell	EID1	EID1
GYPC	4.34785e-18	-6.13839	0.086	0.261	1.03818e-13	Spinous-cell	GYPC	GYPC
VAMP5	4.49064e-18	-2.33189	0.296	0.512	1.07227e-13	Spinous-cell	VAMP5	VAMP5
CSRP1	4.61094e-18	-1.09716	0.773	0.923	1.101e-13	Spinous-cell	CSRP1	CSRP1
PDGFA	5.49327e-18	-0.888631	0.511	0.736	1.31168e-13	Spinous-cell	PDGFA	PDGFA
CD276	5.55466e-18	-0.722227	0.442	0.641	1.32634e-13	Spinous-cell	CD276	CD276
DOCK5	5.64458e-18	-4.21506	0.117	0.303	1.34781e-13	Spinous-cell	DOCK5	DOCK5
ANXA8L1	5.71224e-18	0.928464	0.919	0.907	1.36397e-13	Spinous-cell	ANXA8L1	ANXA8L1
TAX1BP3	6.35063e-18	-0.646015	0.644	0.882	1.5164e-13	Spinous-cell	TAX1BP3	TAX1BP3
PFKM	7.97968e-18	-1.45797	0.394	0.604	1.90539e-13	Spinous-cell	PFKM	PFKM
LOC653653	8.08495e-18	-2.24069	0.109	0.301	1.93052e-13	Spinous-cell	LOC653653	LOC653653
GSDMD.2	9.09966e-18	-1.2269	0.373	0.589	2.17282e-13	Spinous-cell	GSDMD.2	GSDMD
KLK8	9.27643e-18	1.354	0.799	0.707	2.21503e-13	Spinous-cell	KLK8	KLK8
ETV5	9.42062e-18	-1.22295	0.199	0.415	2.24945e-13	Spinous-cell	ETV5	ETV5
LAMA3	1.14703e-17	-0.977966	0.532	0.724	2.73887e-13	Spinous-cell	LAMA3	LAMA3
SLC6A8	1.1651e-17	-0.85646	0.394	0.635	2.78202e-13	Spinous-cell	SLC6A8	SLC6A8
HTRA1	1.22454e-17	-0.574843	0.296	0.537	2.92396e-13	Spinous-cell	HTRA1	HTRA1
EMP2	1.24074e-17	1.03694	0.952	0.936	2.96265e-13	Spinous-cell	EMP2	EMP2
SPATS2L	1.33411e-17	-0.557015	0.54	0.784	3.1856e-13	Spinous-cell	SPATS2L	SPATS2L
MARVELD1	1.33899e-17	-0.772114	0.333	0.564	3.19723e-13	Spinous-cell	MARVELD1	MARVELD1
MT2A	1.34259e-17	-1.2298	0.966	0.996	3.20583e-13	Spinous-cell	MT2A	MT2A
CDH3	1.73073e-17	-0.71159	0.748	0.894	4.13265e-13	Spinous-cell	CDH3	CDH3
IRF4	1.81878e-17	-4.82265	0.117	0.301	4.34289e-13	Spinous-cell	IRF4	IRF4
GALNT2	1.83465e-17	-0.709689	0.48	0.705	4.38078e-13	Spinous-cell	GALNT2	GALNT2
SKA2	1.97766e-17	-0.790625	0.525	0.739	4.72225e-13	Spinous-cell	SKA2	SKA2
TCTN2	2.05824e-17	-0.666098	0.394	0.645	4.91465e-13	Spinous-cell	TCTN2	TCTN2
CHST3	2.33831e-17	-0.591594	0.328	0.56	5.58342e-13	Spinous-cell	CHST3	CHST3
COL6A1	2.53547e-17	-1.33061	0.311	0.527	6.0542e-13	Spinous-cell	COL6A1	COL6A1
IGFBP7-AS1	2.54673e-17	-4.67933	0.071	0.241	6.08108e-13	Spinous-cell	IGFBP7-AS1	IGFBP7-AS1
GMPR	2.7732e-17	-4.80737	0.095	0.27	6.62185e-13	Spinous-cell	GMPR	GMPR
FOXN1	3.2189e-17	2.22951	0.603	0.415	7.6861e-13	Spinous-cell	FOXN1	FOXN1
SLC12A4	3.24312e-17	-1.19992	0.413	0.633	7.74391e-13	Spinous-cell	SLC12A4	SLC12A4
SLC6A15	3.65411e-17	-3.31992	0.12	0.301	8.72527e-13	Spinous-cell	SLC6A15	SLC6A15
GPX8	3.6773e-17	-1.63516	0.104	0.292	8.78065e-13	Spinous-cell	GPX8	GPX8
BBOX1	3.85086e-17	1.76655	0.627	0.423	9.19507e-13	Spinous-cell	BBOX1	BBOX1
NEBL	3.8943e-17	1.77045	0.686	0.496	9.2988e-13	Spinous-cell	NEBL	NEBL
CENPK	3.99946e-17	-2.15004	0.095	0.276	9.5499e-13	Spinous-cell	CENPK	CENPK
RAB32	4.05189e-17	-2.74684	0.221	0.425	9.67509e-13	Spinous-cell	RAB32	RAB32
RAB25	4.33966e-17	1.46412	0.833	0.784	1.03622e-12	Spinous-cell	RAB25	RAB25
SLC25A4	4.52239e-17	-2.47174	0.396	0.575	1.07986e-12	Spinous-cell	SLC25A4	SLC25A4
XYLT2	4.97974e-17	-0.603816	0.457	0.685	1.18906e-12	Spinous-cell	XYLT2	XYLT2
MCM3	5.27585e-17	-0.994574	0.52	0.718	1.25977e-12	Spinous-cell	MCM3	MCM3
DRAM1	5.35653e-17	-1.59698	0.11	0.301	1.27903e-12	Spinous-cell	DRAM1	DRAM1
SOAT1	5.36769e-17	-2.69519	0.261	0.458	1.2817e-12	Spinous-cell	SOAT1	SOAT1
TPM3	6.40867e-17	-0.676049	0.888	0.967	1.53026e-12	Spinous-cell	TPM3	TPM3
MSN	6.6125e-17	-0.53903	0.893	0.965	1.57893e-12	Spinous-cell	MSN	MSN
RBBP7	6.99217e-17	-0.696814	0.781	0.907	1.66959e-12	Spinous-cell	RBBP7	RBBP7
APITD1	7.03167e-17	-1.52315	0.092	0.274	1.67902e-12	Spinous-cell	APITD1	APITD1
CCM2	7.07776e-17	-0.615786	0.485	0.705	1.69003e-12	Spinous-cell	CCM2	CCM2
PHF19	8.59002e-17	-1.8046	0.178	0.378	2.05112e-12	Spinous-cell	PHF19	PHF19
PLIN2	9.11051e-17	-0.629584	0.584	0.761	2.17541e-12	Spinous-cell	PLIN2	PLIN2
ANTXR1	1.06534e-16	-0.912658	0.571	0.753	2.54382e-12	Spinous-cell	ANTXR1	ANTXR1
KIF4A	1.06813e-16	-2.58774	0.043	0.193	2.55047e-12	Spinous-cell	KIF4A	KIF4A
AP3M2	1.29294e-16	-1.82039	0.244	0.459	3.08729e-12	Spinous-cell	AP3M2	AP3M2
CDC42EP3	1.39604e-16	-2.70022	0.287	0.488	3.33345e-12	Spinous-cell	CDC42EP3	CDC42EP3
CKS1B	1.40528e-16	-0.988112	0.543	0.732	3.35552e-12	Spinous-cell	CKS1B	CKS1B
AP1S2	1.54075e-16	-3.29418	0.245	0.438	3.679e-12	Spinous-cell	AP1S2	AP1S2
ASF1B	1.62565e-16	-3.45098	0.124	0.303	3.88173e-12	Spinous-cell	ASF1B	ASF1B
NCAPG2	1.70933e-16	-2.04035	0.183	0.38	4.08153e-12	Spinous-cell	NCAPG2	NCAPG2
TP53I11	1.74539e-16	-0.798678	0.413	0.602	4.16764e-12	Spinous-cell	TP53I11	TP53I11
BMP1	1.81765e-16	-1.20088	0.235	0.442	4.34018e-12	Spinous-cell	BMP1	BMP1
FSTL1	1.85724e-16	-2.31833	0.149	0.34	4.43471e-12	Spinous-cell	FSTL1	FSTL1
DEK	2.25497e-16	-0.734434	0.88	0.954	5.38442e-12	Spinous-cell	DEK	DEK
MCM5	2.32858e-16	-1.09858	0.471	0.666	5.56018e-12	Spinous-cell	MCM5	MCM5
MOB3B	2.52323e-16	-1.08473	0.345	0.568	6.02497e-12	Spinous-cell	MOB3B	MOB3B
SLC16A1	3.02228e-16	-1.4653	0.433	0.645	7.21659e-12	Spinous-cell	SLC16A1	SLC16A1
CAPN2	3.05706e-16	-0.768616	0.514	0.734	7.29964e-12	Spinous-cell	CAPN2	CAPN2
ORAI3	3.20643e-16	-1.22643	0.281	0.49	7.65632e-12	Spinous-cell	ORAI3	ORAI3
ST6GAL1	3.43756e-16	-1.91178	0.081	0.255	8.20821e-12	Spinous-cell	ST6GAL1	ST6GAL1
ESYT1	3.53338e-16	-0.898621	0.64	0.788	8.437e-12	Spinous-cell	ESYT1	ESYT1
WNT3.1	3.62263e-16	-0.992866	0.65	0.799	8.65011e-12	Spinous-cell	WNT3.1	WNT3
ROPN1B	4.39013e-16	-4.04218	0.017	0.139	1.04828e-11	Spinous-cell	ROPN1B	ROPN1B
SPTBN2	4.46526e-16	1.46473	0.745	0.591	1.06621e-11	Spinous-cell	SPTBN2	SPTBN2
TACSTD2	5.87929e-16	0.918123	0.956	0.932	1.40386e-11	Spinous-cell	TACSTD2	TACSTD2
RAPGEF1	6.78822e-16	-0.654542	0.317	0.535	1.62089e-11	Spinous-cell	RAPGEF1	RAPGEF1
DTL	7.48852e-16	-3.09569	0.078	0.243	1.78811e-11	Spinous-cell	DTL	DTL
CPQ	8.151e-16	-2.76189	0.255	0.448	1.9463e-11	Spinous-cell	CPQ	CPQ
QDPR	8.50272e-16	-0.638048	0.502	0.697	2.03028e-11	Spinous-cell	QDPR	QDPR
P4HA1	1.00363e-15	-1.13217	0.31	0.517	2.39646e-11	Spinous-cell	P4HA1	P4HA1
ST3GAL4	1.03723e-15	-2.61484	0.129	0.303	2.47669e-11	Spinous-cell	ST3GAL4	ST3GAL4
M6PR	1.25374e-15	-0.734827	0.526	0.739	2.99367e-11	Spinous-cell	M6PR	M6PR
SGCE	1.33891e-15	-3.39394	0.037	0.174	3.19704e-11	Spinous-cell	SGCE	SGCE
NRG1	1.42788e-15	-1.46948	0.169	0.365	3.40949e-11	Spinous-cell	NRG1	NRG1
AQP3	1.44387e-15	0.717679	1	0.996	3.44768e-11	Spinous-cell	AQP3	AQP3
KLF5	1.5421e-15	0.892227	0.977	0.973	3.68223e-11	Spinous-cell	KLF5	KLF5
MCM7	1.54867e-15	-0.983184	0.683	0.807	3.69792e-11	Spinous-cell	MCM7	MCM7
PLA2G4E	1.71613e-15	1.93234	0.612	0.442	4.09777e-11	Spinous-cell	PLA2G4E	PLA2G4E
RDX	1.746e-15	-0.516767	0.546	0.761	4.1691e-11	Spinous-cell	RDX	RDX
SSH1	1.74833e-15	-0.959801	0.31	0.521	4.17467e-11	Spinous-cell	SSH1	SSH1
GRHL1	1.78266e-15	1.9972	0.594	0.423	4.25663e-11	Spinous-cell	GRHL1	GRHL1
BFAR.1	1.78947e-15	-0.644406	0.368	0.581	4.27289e-11	Spinous-cell	BFAR.1	BFAR
HMGN2	1.81345e-15	-0.903834	0.903	0.971	4.33016e-11	Spinous-cell	HMGN2	HMGN2
CSTA	1.91778e-15	1.80697	0.919	0.888	4.57928e-11	Spinous-cell	CSTA	CSTA
CYB5A	2.05486e-15	1.1058	0.836	0.772	4.90659e-11	Spinous-cell	CYB5A	CYB5A
CERS2	2.43345e-15	-0.832044	0.508	0.693	5.81059e-11	Spinous-cell	CERS2	CERS2
DDX12P	2.59163e-15	-1.72716	0.163	0.349	6.1883e-11	Spinous-cell	DDX12P	DDX12P
CWH43	2.7002e-15	2.2466	0.46	0.27	6.44753e-11	Spinous-cell	CWH43	CWH43
CASP14	2.89693e-15	1.59783	0.84	0.772	6.9173e-11	Spinous-cell	CASP14	CASP14
ANP32C	3.59074e-15	-1.48353	0.113	0.297	8.57397e-11	Spinous-cell	ANP32C	ANP32C
S100A16	3.90904e-15	0.580137	0.992	0.981	9.334e-11	Spinous-cell	S100A16	S100A16
UBE2S	4.10427e-15	-1.5001	0.161	0.351	9.80017e-11	Spinous-cell	UBE2S	UBE2S
CEP55	4.4145e-15	-3.61294	0.055	0.201	1.05409e-10	Spinous-cell	CEP55	CEP55
AHCYL2	4.6947e-15	-1.43095	0.396	0.6	1.121e-10	Spinous-cell	AHCYL2	AHCYL2
SLC2A8	4.88208e-15	-1.12891	0.339	0.548	1.16574e-10	Spinous-cell	SLC2A8	SLC2A8
DIAPH3	5.02415e-15	-2.72967	0.054	0.201	1.19967e-10	Spinous-cell	DIAPH3	DIAPH3
C1R	5.15226e-15	-1.62812	0.563	0.708	1.23026e-10	Spinous-cell	C1R	C1R
HSPA12A	5.55832e-15	-2.44673	0.17	0.359	1.32722e-10	Spinous-cell	HSPA12A	HSPA12A
GSTA4	5.82905e-15	1.21864	0.851	0.832	1.39186e-10	Spinous-cell	GSTA4	GSTA4
DYNLL1	6.82711e-15	0.692843	0.979	0.979	1.63018e-10	Spinous-cell	DYNLL1	DYNLL1
SMC2	6.93793e-15	-1.52148	0.304	0.508	1.65664e-10	Spinous-cell	SMC2	SMC2
SLC7A8	7.21753e-15	-2.20124	0.268	0.45	1.7234e-10	Spinous-cell	SLC7A8	SLC7A8
DIP2C	7.29864e-15	-1.85149	0.262	0.456	1.74277e-10	Spinous-cell	DIP2C	DIP2C
LIX1L	7.95642e-15	-1.31919	0.183	0.373	1.89983e-10	Spinous-cell	LIX1L	LIX1L
ZNF704	8.00493e-15	-0.681484	0.152	0.344	1.91142e-10	Spinous-cell	ZNF704	ZNF704
RBBP8	8.0912e-15	-0.689764	0.544	0.728	1.93202e-10	Spinous-cell	RBBP8	RBBP8
GCNT2	8.7595e-15	-2.20843	0.075	0.232	2.09159e-10	Spinous-cell	GCNT2	GCNT2
CCNA2	9.98596e-15	-3.52212	0.209	0.4	2.38445e-10	Spinous-cell	CCNA2	CCNA2
MAGED2	1.00296e-14	-1.34372	0.713	0.857	2.39487e-10	Spinous-cell	MAGED2	MAGED2
PRAF2	1.07995e-14	-1.2507	0.186	0.373	2.57871e-10	Spinous-cell	PRAF2	PRAF2
GGA2	1.11752e-14	-0.804866	0.526	0.722	2.66841e-10	Spinous-cell	GGA2	GGA2
SNRPB	1.11874e-14	-0.560182	0.922	0.977	2.67133e-10	Spinous-cell	SNRPB	SNRPB
SLCO4A1	1.13971e-14	-3.5701	0.112	0.276	2.72139e-10	Spinous-cell	SLCO4A1	SLCO4A1
GINS1	1.16442e-14	-1.18161	0.132	0.313	2.78039e-10	Spinous-cell	GINS1	GINS1
CDK4	1.21433e-14	-0.714032	0.73	0.851	2.89957e-10	Spinous-cell	CDK4	CDK4
MYEF2	1.27069e-14	-2.13487	0.081	0.236	3.03416e-10	Spinous-cell	MYEF2	MYEF2
TGIF2	1.37827e-14	-1.42603	0.126	0.303	3.29104e-10	Spinous-cell	TGIF2	TGIF2
GPR143	1.48774e-14	-4.76535	0.129	0.293	3.55243e-10	Spinous-cell	GPR143	GPR143
DENND5A	1.65215e-14	-0.965677	0.184	0.376	3.94501e-10	Spinous-cell	DENND5A	DENND5A
C1S	1.72691e-14	-1.45754	0.351	0.541	4.12351e-10	Spinous-cell	C1S	C1S
ITGA6	1.77076e-14	-0.880112	0.693	0.822	4.22823e-10	Spinous-cell	ITGA6	ITGA6
CLEC12B	1.78191e-14	-6.0546	0.067	0.212	4.25484e-10	Spinous-cell	CLEC12B	CLEC12B
LZTS1	1.8271e-14	-4.09884	0.113	0.274	4.36274e-10	Spinous-cell	LZTS1	LZTS1
PDPN	1.8377e-14	-1.24537	0.356	0.556	4.38805e-10	Spinous-cell	PDPN	PDPN
ARL6IP5	2.09593e-14	-0.642286	0.788	0.913	5.00466e-10	Spinous-cell	ARL6IP5	ARL6IP5
USP13	2.25619e-14	-1.74898	0.049	0.191	5.38732e-10	Spinous-cell	USP13	USP13
ABHD2	2.3514e-14	-1.66997	0.819	0.921	5.61468e-10	Spinous-cell	ABHD2	ABHD2
WDR34	2.8196e-14	-0.863068	0.557	0.712	6.73264e-10	Spinous-cell	WDR34	WDR34
ARSB	2.90911e-14	-1.74101	0.092	0.253	6.94638e-10	Spinous-cell	ARSB	ARSB
TUSC3	2.95082e-14	-1.19675	0.219	0.415	7.04596e-10	Spinous-cell	TUSC3	TUSC3
MAFB	3.14e-14	0.911803	0.926	0.896	7.49768e-10	Spinous-cell	MAFB	MAFB
CALML5	3.19228e-14	1.75296	0.85	0.768	7.62252e-10	Spinous-cell	CALML5	CALML5
CDCA3	3.39622e-14	-3.35513	0.074	0.224	8.10948e-10	Spinous-cell	CDCA3	CDCA3
CENPW	3.54541e-14	-1.50502	0.31	0.485	8.46574e-10	Spinous-cell	CENPW	CENPW
TTYH2	3.75329e-14	-3.88085	0.078	0.226	8.9621e-10	Spinous-cell	TTYH2	TTYH2
ACOT9	3.93548e-14	-0.822935	0.288	0.486	9.39714e-10	Spinous-cell	ACOT9	ACOT9
CDCA5	4.03892e-14	-2.50774	0.11	0.276	9.64413e-10	Spinous-cell	CDCA5	CDCA5
IRX4	4.70089e-14	-0.981015	0.454	0.643	1.12248e-09	Spinous-cell	IRX4	IRX4
BIRC7	4.80222e-14	-4.10047	0.023	0.137	1.14667e-09	Spinous-cell	BIRC7	BIRC7
FANCI	4.85905e-14	-1.75523	0.221	0.4	1.16025e-09	Spinous-cell	FANCI	FANCI
RORA	4.95659e-14	1.62371	0.885	0.857	1.18353e-09	Spinous-cell	RORA	RORA
ITPK1.1	4.99122e-14	-0.676234	0.313	0.496	1.1918e-09	Spinous-cell	ITPK1.1	ITPK1
UHRF1	5.00875e-14	-2.07778	0.129	0.295	1.19599e-09	Spinous-cell	UHRF1	UHRF1
TFAP2B	5.02273e-14	-2.77801	0.244	0.425	1.19933e-09	Spinous-cell	TFAP2B	TFAP2B
SFN	5.10888e-14	0.570572	1	0.996	1.2199e-09	Spinous-cell	SFN	SFN
TRIM29	5.31739e-14	0.548596	1	0.992	1.26969e-09	Spinous-cell	TRIM29	TRIM29
TRAM2	5.58666e-14	-0.882397	0.152	0.33	1.33398e-09	Spinous-cell	TRAM2	TRAM2
NCAPH	5.62535e-14	-3.86535	0.063	0.203	1.34322e-09	Spinous-cell	NCAPH	NCAPH
GGT6	5.80807e-14	2.17414	0.426	0.237	1.38685e-09	Spinous-cell	GGT6	GGT6
LEF1	5.92177e-14	-2.89732	0.057	0.197	1.414e-09	Spinous-cell	LEF1	LEF1
FKBP7	5.95247e-14	-0.830988	0.052	0.193	1.42133e-09	Spinous-cell	FKBP7	FKBP7
MTHFD1L	6.1114e-14	-2.58716	0.201	0.384	1.45928e-09	Spinous-cell	MTHFD1L	MTHFD1L
2026-09-04	6.97734e-14	-3.54967	0.113	0.272	1.66605e-09	Spinous-cell	2026-09-04	2026-09-04
TBC1D16	7.08436e-14	-3.85821	0.291	0.473	1.6916e-09	Spinous-cell	TBC1D16	TBC1D16
SCARB1	7.73134e-14	-2.18514	0.227	0.413	1.84609e-09	Spinous-cell	SCARB1	SCARB1
LOC115110.1	7.91618e-14	-2.16117	0.055	0.191	1.89023e-09	Spinous-cell	LOC115110.1	LOC115110
RENBP	8.30742e-14	-3.92809	0.026	0.143	1.98365e-09	Spinous-cell	RENBP	RENBP
SDC2	8.33068e-14	-1.54808	0.089	0.243	1.9892e-09	Spinous-cell	SDC2	SDC2
EPS8	8.55097e-14	-1.27683	0.115	0.28	2.0418e-09	Spinous-cell	EPS8	EPS8
KIF11	8.71869e-14	-2.70816	0.147	0.315	2.08185e-09	Spinous-cell	KIF11	KIF11
ALDH2	9.09081e-14	0.878854	0.963	0.969	2.1707e-09	Spinous-cell	ALDH2	ALDH2
FANCA	9.54961e-14	-1.47717	0.123	0.293	2.28026e-09	Spinous-cell	FANCA	FANCA
GRAMD1A	9.58105e-14	-1.12277	0.19	0.378	2.28776e-09	Spinous-cell	GRAMD1A	GRAMD1A
RHOA	9.96853e-14	-0.661039	0.982	1	2.38029e-09	Spinous-cell	RHOA	RHOA
NUPR1	1.00517e-13	1.13194	0.936	0.902	2.40013e-09	Spinous-cell	NUPR1	NUPR1
PLA2G4F	1.0065e-13	1.49792	0.775	0.66	2.40331e-09	Spinous-cell	PLA2G4F	PLA2G4F
TMEM154	1.01242e-13	1.38026	0.755	0.67	2.41746e-09	Spinous-cell	TMEM154	TMEM154
FUCA2	1.02976e-13	-1.80384	0.307	0.49	2.45887e-09	Spinous-cell	FUCA2	FUCA2
TGOLN2	1.04374e-13	-0.526504	0.646	0.784	2.49224e-09	Spinous-cell	TGOLN2	TGOLN2
CLIC4	1.0682e-13	-1.62174	0.525	0.708	2.55064e-09	Spinous-cell	CLIC4	CLIC4
FEN1	1.11275e-13	-1.72396	0.278	0.456	2.65701e-09	Spinous-cell	FEN1	FEN1
LSM4	1.12862e-13	-0.541074	0.79	0.894	2.69492e-09	Spinous-cell	LSM4	LSM4
MFGE8	1.49758e-13	-1.20272	0.537	0.736	3.57591e-09	Spinous-cell	MFGE8	MFGE8
OSBPL1A	1.52123e-13	-1.16901	0.36	0.537	3.63238e-09	Spinous-cell	OSBPL1A	OSBPL1A
MYBL2	1.68887e-13	-2.4105	0.117	0.276	4.03267e-09	Spinous-cell	MYBL2	MYBL2
FLOT1.2	1.69445e-13	-0.575797	0.577	0.745	4.04601e-09	Spinous-cell	FLOT1.2	FLOT1
ZEB2	1.70216e-13	-3.15034	0.104	0.257	4.06442e-09	Spinous-cell	ZEB2	ZEB2
MAD2L1	1.81451e-13	-1.90607	0.189	0.363	4.33269e-09	Spinous-cell	MAD2L1	MAD2L1
APMAP	1.85985e-13	-0.626009	0.62	0.778	4.44096e-09	Spinous-cell	APMAP	APMAP
FTH1P3	2.08491e-13	-1.92417	0.19	0.39	4.97835e-09	Spinous-cell	FTH1P3	FTH1P3
TRAF5	2.0913e-13	-3.09353	0.069	0.212	4.99361e-09	Spinous-cell	TRAF5	TRAF5
THBD	2.1426e-13	0.71003	0.781	0.654	5.11611e-09	Spinous-cell	THBD	THBD
SLC7A1	2.14784e-13	-0.583366	0.604	0.772	5.1286e-09	Spinous-cell	SLC7A1	SLC7A1
VEPH1	2.20044e-13	-3.10538	0.054	0.185	5.25421e-09	Spinous-cell	VEPH1	VEPH1
LDLRAD2	2.30976e-13	-1.0431	0.066	0.216	5.51525e-09	Spinous-cell	LDLRAD2	LDLRAD2
FPGS	2.51241e-13	-0.684281	0.439	0.622	5.99912e-09	Spinous-cell	FPGS	FPGS
TRAK2	2.53192e-13	-0.50486	0.153	0.338	6.04573e-09	Spinous-cell	TRAK2	TRAK2
MYADM	2.59845e-13	-0.807106	0.465	0.658	6.20457e-09	Spinous-cell	MYADM	MYADM
MYO10	2.63418e-13	-1.37362	0.615	0.759	6.2899e-09	Spinous-cell	MYO10	MYO10
NRM.4	2.71689e-13	-1.00064	0.314	0.502	6.48738e-09	Spinous-cell	NRM.4	NRM
ZNF385A	2.96055e-13	0.827821	0.949	0.921	7.0692e-09	Spinous-cell	ZNF385A	ZNF385A
CPNE8	3.27553e-13	-1.13793	0.298	0.486	7.82131e-09	Spinous-cell	CPNE8	CPNE8
PSAP	3.37681e-13	-1.41253	0.989	0.996	8.06316e-09	Spinous-cell	PSAP	PSAP
MT1F	3.39785e-13	-1.13464	0.308	0.506	8.11337e-09	Spinous-cell	MT1F	MT1F
SGCD	3.5471e-13	-5.14286	0.028	0.141	8.46977e-09	Spinous-cell	SGCD	SGCD
PAQR4	3.5687e-13	-0.872926	0.294	0.496	8.52135e-09	Spinous-cell	PAQR4	PAQR4
RAB36	3.59911e-13	-1.46858	0.061	0.201	8.59396e-09	Spinous-cell	RAB36	RAB36
EPHX3	3.73088e-13	2.35689	0.509	0.353	8.90859e-09	Spinous-cell	EPHX3	EPHX3
FAM134B	3.75683e-13	-1.13563	0.169	0.346	8.97055e-09	Spinous-cell	FAM134B	FAM134B
LTBP2	3.80117e-13	-1.06439	0.267	0.456	9.07644e-09	Spinous-cell	LTBP2	LTBP2
BEST1	3.82245e-13	-4.96273	0.051	0.178	9.12724e-09	Spinous-cell	BEST1	BEST1
TPX2	3.83955e-13	-3.17454	0.184	0.353	9.16807e-09	Spinous-cell	TPX2	TPX2
CDCA2	3.99282e-13	-2.83541	0.048	0.176	9.53405e-09	Spinous-cell	CDCA2	CDCA2
CYP26B1	4.14003e-13	-1.1589	0.12	0.282	9.88556e-09	Spinous-cell	CYP26B1	CYP26B1
TK1	4.47931e-13	-3.00294	0.342	0.496	1.06957e-08	Spinous-cell	TK1	TK1
DOCK10	4.5646e-13	-1.5732	0.12	0.278	1.08994e-08	Spinous-cell	DOCK10	DOCK10
FAM83C	4.5862e-13	1.77221	0.684	0.55	1.09509e-08	Spinous-cell	FAM83C	FAM83C
ITM2A	4.61229e-13	-0.848769	0.31	0.498	1.10132e-08	Spinous-cell	ITM2A	ITM2A
HAUS8	4.63361e-13	-1.15221	0.072	0.216	1.10641e-08	Spinous-cell	HAUS8	HAUS8
SPC25.1	4.76735e-13	-3.63988	0.054	0.183	1.13835e-08	Spinous-cell	SPC25.1	SPC25
CYSTM1	5.21579e-13	-1.51318	0.359	0.544	1.24543e-08	Spinous-cell	CYSTM1	CYSTM1
DHRS7	5.43151e-13	-0.954659	0.506	0.681	1.29694e-08	Spinous-cell	DHRS7	DHRS7
GDPD2	5.64372e-13	-1.23139	0.488	0.653	1.34761e-08	Spinous-cell	GDPD2	GDPD2
GSTO1	5.77061e-13	-0.536485	0.801	0.917	1.37791e-08	Spinous-cell	GSTO1	GSTO1
LOC102723354	6.14638e-13	-0.966332	0.071	0.216	1.46763e-08	Spinous-cell	LOC102723354	LOC102723354
UBE2C	6.2055e-13	-4.07069	0.172	0.334	1.48175e-08	Spinous-cell	UBE2C	UBE2C
RNF14	6.52015e-13	-0.748193	0.477	0.649	1.55688e-08	Spinous-cell	RNF14	RNF14
CALM2	6.52657e-13	-0.671084	0.983	0.998	1.55841e-08	Spinous-cell	CALM2	CALM2
ABHD3	6.81547e-13	-1.23652	0.229	0.411	1.6274e-08	Spinous-cell	ABHD3	ABHD3
IQGAP3	7.00694e-13	-2.60299	0.123	0.282	1.67312e-08	Spinous-cell	IQGAP3	IQGAP3
SHISA5	7.24741e-13	-0.64302	0.796	0.907	1.73054e-08	Spinous-cell	SHISA5	SHISA5
TRPV2	7.40695e-13	-3.49855	0.104	0.253	1.76863e-08	Spinous-cell	TRPV2	TRPV2
CCND1	7.6062e-13	1.42717	0.913	0.917	1.81621e-08	Spinous-cell	CCND1	CCND1
CCDC50	7.94257e-13	-0.50792	0.503	0.685	1.89653e-08	Spinous-cell	CCDC50	CCDC50
CTNNBIP1	7.97335e-13	1.20252	0.949	0.948	1.90388e-08	Spinous-cell	CTNNBIP1	CTNNBIP1
BRCA2	8.12127e-13	-2.796	0.063	0.197	1.9392e-08	Spinous-cell	BRCA2	BRCA2
P3H2	8.16119e-13	-0.901363	0.36	0.541	1.94873e-08	Spinous-cell	P3H2	P3H2
LGALS9B	8.54838e-13	-1.82696	0.026	0.137	2.04118e-08	Spinous-cell	LGALS9B	LGALS9B
SPRED2	8.61606e-13	-0.695918	0.204	0.384	2.05734e-08	Spinous-cell	SPRED2	SPRED2
CELF2	8.66716e-13	-2.10954	0.156	0.322	2.06954e-08	Spinous-cell	CELF2	CELF2
TCF19.2	8.80061e-13	-0.913546	0.275	0.446	2.10141e-08	Spinous-cell	TCF19.2	TCF19
LY6E.1	8.90454e-13	-0.572066	0.83	0.89	2.12623e-08	Spinous-cell	LY6E.1	LY6E
FOXD3-AS1	8.98653e-13	-3.11794	0.012	0.108	2.1458e-08	Spinous-cell	FOXD3-AS1	FOXD3-AS1
CRYM	9.57241e-13	-4.46479	0.066	0.201	2.2857e-08	Spinous-cell	CRYM	CRYM
ADIPOR1	9.57939e-13	-0.551585	0.89	0.963	2.28737e-08	Spinous-cell	ADIPOR1	ADIPOR1
KLK11	9.77404e-13	1.09041	0.811	0.707	2.33385e-08	Spinous-cell	KLK11	KLK11
LPPR4	1.00588e-12	-4.28148	0.046	0.168	2.40184e-08	Spinous-cell	LPPR4	LPPR4
AURKB	1.03944e-12	-3.27422	0.11	0.259	2.48197e-08	Spinous-cell	AURKB	AURKB
LAD1	1.08079e-12	0.742556	0.939	0.898	2.58072e-08	Spinous-cell	LAD1	LAD1
GLB1	1.08506e-12	-0.623658	0.446	0.61	2.59091e-08	Spinous-cell	GLB1	GLB1
ANXA6	1.09149e-12	-2.00679	0.083	0.226	2.60627e-08	Spinous-cell	ANXA6	ANXA6
KRT15	1.11157e-12	-0.90867	0.939	0.958	2.65422e-08	Spinous-cell	KRT15	KRT15
BNC2	1.16933e-12	-1.46879	0.144	0.307	2.79214e-08	Spinous-cell	BNC2	BNC2
BSCL2.1	1.18146e-12	-1.19704	0.178	0.361	2.82109e-08	Spinous-cell	BSCL2.1	BSCL2
RAPGEFL1	1.26111e-12	1.66311	0.813	0.741	3.01127e-08	Spinous-cell	RAPGEFL1	RAPGEFL1
KIAA0101	1.33646e-12	-1.73041	0.256	0.419	3.19119e-08	Spinous-cell	KIAA0101	KIAA0101
PTPRM	1.39225e-12	-4.91922	0.097	0.237	3.32441e-08	Spinous-cell	PTPRM	PTPRM
MCM2	1.47905e-12	-1.0809	0.248	0.427	3.53167e-08	Spinous-cell	MCM2	MCM2
SMOC2	1.49885e-12	-0.94439	0.138	0.301	3.57896e-08	Spinous-cell	SMOC2	SMOC2
C4orf48	1.50002e-12	-3.23605	0.232	0.388	3.58176e-08	Spinous-cell	C4orf48	C4orf48
STMN3	1.56387e-12	-0.542224	0.278	0.467	3.7342e-08	Spinous-cell	STMN3	STMN3
NEDD9	1.58532e-12	-1.83439	0.097	0.243	3.78543e-08	Spinous-cell	NEDD9	NEDD9
P4HA2	1.64279e-12	-0.779236	0.462	0.629	3.92265e-08	Spinous-cell	P4HA2	P4HA2
GLA	1.75507e-12	-0.909067	0.262	0.444	4.19075e-08	Spinous-cell	GLA	GLA
RFC2	1.76291e-12	-0.508661	0.521	0.689	4.20949e-08	Spinous-cell	RFC2	RFC2
NPTN	1.81759e-12	-0.556021	0.848	0.923	4.34003e-08	Spinous-cell	NPTN	NPTN
NME4	1.87993e-12	-0.558253	0.463	0.666	4.48889e-08	Spinous-cell	NME4	NME4
FARP1	1.88758e-12	-0.980013	0.097	0.247	4.50717e-08	Spinous-cell	FARP1	FARP1
HSP90B1	1.94084e-12	-0.559647	0.908	0.954	4.63433e-08	Spinous-cell	HSP90B1	HSP90B1
BUB1B	2.04405e-12	-2.67588	0.064	0.197	4.88078e-08	Spinous-cell	BUB1B	BUB1B
DEPDC1	2.13601e-12	-3.37708	0.048	0.17	5.10036e-08	Spinous-cell	DEPDC1	DEPDC1
SLC24A5	2.47739e-12	-5.9623	0.083	0.216	5.91552e-08	Spinous-cell	SLC24A5	SLC24A5
SLCO4A1-AS1	2.52262e-12	-4.32626	0.049	0.17	6.02351e-08	Spinous-cell	SLCO4A1-AS1	SLCO4A1-AS1
OSTM1	2.52295e-12	-2.73002	0.469	0.606	6.0243e-08	Spinous-cell	OSTM1	OSTM1
LPGAT1	2.69607e-12	-1.22459	0.258	0.446	6.43769e-08	Spinous-cell	LPGAT1	LPGAT1
TRIP13	2.71829e-12	-2.68825	0.107	0.253	6.49074e-08	Spinous-cell	TRIP13	TRIP13
PHF1.1	2.74591e-12	-0.901993	0.368	0.562	6.5567e-08	Spinous-cell	PHF1.1	PHF1
KRT80	2.78913e-12	1.86069	0.595	0.432	6.65988e-08	Spinous-cell	KRT80	KRT80
C17orf53	2.96645e-12	-2.99793	0.041	0.16	7.0833e-08	Spinous-cell	C17orf53	C17orf53
MKI67	3.13763e-12	-2.32435	0.206	0.371	7.49202e-08	Spinous-cell	MKI67	MKI67
TGFB2	3.19135e-12	-2.88793	0.037	0.153	7.6203e-08	Spinous-cell	TGFB2	TGFB2
CCND2	3.24273e-12	-0.672568	0.617	0.78	7.74299e-08	Spinous-cell	CCND2	CCND2
TACC3	3.32972e-12	-2.88273	0.149	0.305	7.95071e-08	Spinous-cell	TACC3	TACC3
SMARCA1	3.41418e-12	-1.48269	0.259	0.444	8.15237e-08	Spinous-cell	SMARCA1	SMARCA1
AKAP12	3.54138e-12	-2.2739	0.066	0.195	8.4561e-08	Spinous-cell	AKAP12	AKAP12
BNIPL	3.78394e-12	1.48208	0.738	0.629	9.0353e-08	Spinous-cell	BNIPL	BNIPL
IFT22	3.81388e-12	-0.700484	0.319	0.506	9.10678e-08	Spinous-cell	IFT22	IFT22
CDCA8	3.83368e-12	-3.91982	0.081	0.216	9.15407e-08	Spinous-cell	CDCA8	CDCA8
LGALS1	3.89066e-12	-2.22716	0.477	0.622	9.29012e-08	Spinous-cell	LGALS1	LGALS1
TMEM40	3.8947e-12	1.86723	0.59	0.481	9.29977e-08	Spinous-cell	TMEM40	TMEM40
CYGB	3.94923e-12	-4.86095	0.072	0.205	9.42998e-08	Spinous-cell	CYGB	CYGB
MYO5A	3.96127e-12	-1.36547	0.525	0.707	9.45872e-08	Spinous-cell	MYO5A	MYO5A
LIMD2	3.99658e-12	-2.22741	0.153	0.313	9.54304e-08	Spinous-cell	LIMD2	LIMD2
HEXB	4.19622e-12	-0.868565	0.61	0.739	1.00197e-07	Spinous-cell	HEXB	HEXB
PKM	4.26378e-12	-0.5559	0.995	1	1.01811e-07	Spinous-cell	PKM	PKM
RAB7A	4.44291e-12	-0.665747	0.949	0.979	1.06088e-07	Spinous-cell	RAB7A	RAB7A
COTL1	4.46384e-12	-1.42042	0.238	0.405	1.06587e-07	Spinous-cell	COTL1	COTL1
TAPBP.4	4.56061e-12	-0.522141	0.946	0.99	1.08898e-07	Spinous-cell	TAPBP.4	TAPBP
MLEC	4.58201e-12	-1.41504	0.532	0.687	1.09409e-07	Spinous-cell	MLEC	MLEC
MNS1	4.58524e-12	-1.95639	0.078	0.214	1.09486e-07	Spinous-cell	MNS1	MNS1
STARD3NL	4.60051e-12	-1.42978	0.259	0.432	1.09851e-07	Spinous-cell	STARD3NL	STARD3NL
FADS2	4.81182e-12	-3.36189	0.069	0.201	1.14897e-07	Spinous-cell	FADS2	FADS2
SLC27A1	4.98133e-12	-1.01824	0.304	0.473	1.18944e-07	Spinous-cell	SLC27A1	SLC27A1
RNASEH2A	5.26153e-12	-1.01949	0.388	0.548	1.25635e-07	Spinous-cell	RNASEH2A	RNASEH2A
SERPINE2	5.27277e-12	-1.99262	0.187	0.342	1.25903e-07	Spinous-cell	SERPINE2	SERPINE2
KIF23	5.29084e-12	-2.35055	0.115	0.261	1.26335e-07	Spinous-cell	KIF23	KIF23
HJURP	5.3259e-12	-3.01445	0.054	0.176	1.27172e-07	Spinous-cell	HJURP	HJURP
ISYNA1	5.89249e-12	-1.00974	0.117	0.274	1.40701e-07	Spinous-cell	ISYNA1	ISYNA1
KIF4B	6.03609e-12	-1.40279	0.026	0.131	1.4413e-07	Spinous-cell	KIF4B	KIF4B
MT1X	6.04834e-12	0.759552	0.997	0.998	1.44422e-07	Spinous-cell	MT1X	MT1X
ACER3	6.26849e-12	-0.965791	0.331	0.51	1.49679e-07	Spinous-cell	ACER3	ACER3
CSPG4	6.28424e-12	-0.752155	0.143	0.297	1.50055e-07	Spinous-cell	CSPG4	CSPG4
CYP27A1	6.28833e-12	-1.29661	0.14	0.295	1.50153e-07	Spinous-cell	CYP27A1	CYP27A1
MLPH	6.32502e-12	-3.2003	0.097	0.236	1.51029e-07	Spinous-cell	MLPH	MLPH
GPSM2	6.42502e-12	-0.867441	0.595	0.751	1.53417e-07	Spinous-cell	GPSM2	GPSM2
B9D2	6.65696e-12	-1.43913	0.153	0.315	1.58955e-07	Spinous-cell	B9D2	B9D2
DHFR	6.69036e-12	-2.06692	0.138	0.292	1.59752e-07	Spinous-cell	DHFR	DHFR
FAH	7.00678e-12	-0.859291	0.253	0.431	1.67308e-07	Spinous-cell	FAH	FAH
PFDN1	7.25835e-12	-0.509953	0.681	0.815	1.73315e-07	Spinous-cell	PFDN1	PFDN1
RNF130	7.37392e-12	-2.04773	0.248	0.411	1.76074e-07	Spinous-cell	RNF130	RNF130
TRIM47	7.59591e-12	-0.625575	0.483	0.666	1.81375e-07	Spinous-cell	TRIM47	TRIM47
GJB1	7.8425e-12	-4.31143	0.014	0.104	1.87263e-07	Spinous-cell	GJB1	GJB1
PLXND1	7.86715e-12	-1.66016	0.078	0.212	1.87852e-07	Spinous-cell	PLXND1	PLXND1
SERPINF1	8.35688e-12	-1.23176	0.268	0.452	1.99546e-07	Spinous-cell	SERPINF1	SERPINF1
MIR6811	8.45729e-12	-2.41644	0.006	0.087	2.01943e-07	Spinous-cell	MIR6811	MIR6811
CBX5	8.55313e-12	-0.524003	0.735	0.844	2.04232e-07	Spinous-cell	CBX5	CBX5
MND1	8.67464e-12	-2.50572	0.057	0.18	2.07133e-07	Spinous-cell	MND1	MND1
GNAQ	8.72269e-12	-0.676239	0.353	0.523	2.0828e-07	Spinous-cell	GNAQ	GNAQ
MELK	8.88897e-12	-2.13713	0.14	0.286	2.12251e-07	Spinous-cell	MELK	MELK
C1QTNF1	9.0396e-12	-1.668	0.115	0.263	2.15847e-07	Spinous-cell	C1QTNF1	C1QTNF1
C2orf54	9.44801e-12	1.71426	0.54	0.386	2.256e-07	Spinous-cell	C2orf54	C2orf54
TYMSOS	9.89856e-12	-1.00596	0.061	0.191	2.36358e-07	Spinous-cell	TYMSOS	TYMSOS
PSRC1	9.90296e-12	-3.00058	0.095	0.232	2.36463e-07	Spinous-cell	PSRC1	PSRC1
KLC3	1.02402e-11	1.06726	0.845	0.774	2.44515e-07	Spinous-cell	KLC3	KLC3
AIF1L	1.03476e-11	-3.24783	0.158	0.305	2.4708e-07	Spinous-cell	AIF1L	AIF1L
TMEM55A	1.14053e-11	-1.282	0.236	0.403	2.72337e-07	Spinous-cell	TMEM55A	TMEM55A
PHLDA1	1.15228e-11	-1.34735	0.324	0.492	2.75141e-07	Spinous-cell	PHLDA1	PHLDA1
ALX1	1.20535e-11	-4.08135	0.031	0.135	2.87814e-07	Spinous-cell	ALX1	ALX1
MED15	1.21814e-11	-0.561159	0.655	0.807	2.90867e-07	Spinous-cell	MED15	MED15
CEP72	1.22974e-11	-3.21041	0.173	0.33	2.93638e-07	Spinous-cell	CEP72	CEP72
ARHGAP31	1.25966e-11	-1.30801	0.086	0.226	3.00782e-07	Spinous-cell	ARHGAP31	ARHGAP31
RAB5C	1.29175e-11	-0.500873	0.844	0.94	3.08444e-07	Spinous-cell	RAB5C	RAB5C
CCDC88A	1.29312e-11	-1.1104	0.293	0.473	3.0877e-07	Spinous-cell	CCDC88A	CCDC88A
GSTA3	1.29864e-11	2.8298	0.291	0.139	3.1009e-07	Spinous-cell	GSTA3	GSTA3
CHAF1B	1.30662e-11	-1.15259	0.163	0.324	3.11994e-07	Spinous-cell	CHAF1B	CHAF1B
PBK	1.31233e-11	-2.34357	0.113	0.253	3.13357e-07	Spinous-cell	PBK	PBK
LRRN4CL	1.34538e-11	-4.44776	0.025	0.124	3.21251e-07	Spinous-cell	LRRN4CL	LRRN4CL
PAX3	1.36675e-11	-2.96998	0.052	0.17	3.26352e-07	Spinous-cell	PAX3	PAX3
LDHB	1.3835e-11	-0.973486	0.653	0.766	3.30353e-07	Spinous-cell	LDHB	LDHB
FANCG	1.43816e-11	-0.596668	0.164	0.324	3.43404e-07	Spinous-cell	FANCG	FANCG
LIMA1	1.4513e-11	-0.524293	0.793	0.903	3.46541e-07	Spinous-cell	LIMA1	LIMA1
CYBRD1	1.53154e-11	-1.07511	0.477	0.637	3.65702e-07	Spinous-cell	CYBRD1	CYBRD1
NRSN2	1.53543e-11	-1.11993	0.141	0.292	3.66631e-07	Spinous-cell	NRSN2	NRSN2
YWHAH	1.54158e-11	-0.693901	0.764	0.876	3.68099e-07	Spinous-cell	YWHAH	YWHAH
B3GALTL	1.55924e-11	-0.922404	0.227	0.396	3.72316e-07	Spinous-cell	B3GALTL	B3GALTL
POSTN	1.57006e-11	-1.32992	0.529	0.654	3.74898e-07	Spinous-cell	POSTN	POSTN
PLSCR1	1.63853e-11	-0.760357	0.434	0.612	3.91248e-07	Spinous-cell	PLSCR1	PLSCR1
LOC102724020	1.64299e-11	-9.39017	0	0.068	3.92313e-07	Spinous-cell	LOC102724020	LOC102724020
BIRC5	1.67272e-11	-2.72682	0.225	0.38	3.99413e-07	Spinous-cell	BIRC5	BIRC5
CD99L2	1.71578e-11	-2.16282	0.138	0.29	4.09694e-07	Spinous-cell	CD99L2	CD99L2
HACL1	1.75045e-11	-0.601427	0.299	0.488	4.17973e-07	Spinous-cell	HACL1	HACL1
TWSG1	1.87994e-11	-0.855841	0.457	0.624	4.48891e-07	Spinous-cell	TWSG1	TWSG1
MEF2C	1.90032e-11	-2.47258	0.046	0.16	4.53759e-07	Spinous-cell	MEF2C	MEF2C
DBI	1.91567e-11	0.839005	0.968	0.979	4.57423e-07	Spinous-cell	DBI	DBI
SERINC1	1.99126e-11	-0.794126	0.81	0.902	4.75473e-07	Spinous-cell	SERINC1	SERINC1
YBX3	1.99501e-11	0.753305	0.974	0.971	4.76369e-07	Spinous-cell	YBX3	YBX3
LOC100130370	2.00884e-11	-2.95235	0.015	0.104	4.7967e-07	Spinous-cell	LOC100130370	LOC100130370
GATM	2.03004e-11	1.35424	0.768	0.701	4.84733e-07	Spinous-cell	GATM	GATM
RAD54L	2.07486e-11	-2.06245	0.075	0.205	4.95436e-07	Spinous-cell	RAD54L	RAD54L
SLC45A2.2	2.08153e-11	-4.50918	0.028	0.127	4.97029e-07	Spinous-cell	SLC45A2.2	SLC45A2
DSC1	2.09321e-11	2.05497	0.618	0.483	4.99817e-07	Spinous-cell	DSC1	DSC1
COX7A1	2.12626e-11	-2.79631	0.043	0.156	5.07709e-07	Spinous-cell	COX7A1	COX7A1
DLGAP5	2.14745e-11	-2.19255	0.075	0.205	5.12768e-07	Spinous-cell	DLGAP5	DLGAP5
ASPA	2.14997e-11	-2.20246	0.054	0.172	5.1337e-07	Spinous-cell	ASPA	ASPA
LHFP	2.18513e-11	-1.52035	0.135	0.288	5.21766e-07	Spinous-cell	LHFP	LHFP
LAMB4	2.23377e-11	-0.947117	0.437	0.593	5.33378e-07	Spinous-cell	LAMB4	LAMB4
FANCD2	2.35981e-11	-1.48769	0.224	0.386	5.63476e-07	Spinous-cell	FANCD2	FANCD2
LASP1	2.36931e-11	-0.613806	0.615	0.764	5.65745e-07	Spinous-cell	LASP1	LASP1
HSPD1	2.43519e-11	-0.606138	0.811	0.905	5.81474e-07	Spinous-cell	HSPD1	HSPD1
SKA3	2.43713e-11	-2.19514	0.098	0.232	5.81937e-07	Spinous-cell	SKA3	SKA3
ETS1	2.51684e-11	-1.10584	0.247	0.421	6.00972e-07	Spinous-cell	ETS1	ETS1
CLTB	2.60553e-11	0.750635	0.957	0.958	6.22149e-07	Spinous-cell	CLTB	CLTB
ENPP2	2.61245e-11	-4.35567	0.103	0.236	6.23801e-07	Spinous-cell	ENPP2	ENPP2
FBXO7	2.62924e-11	-0.808293	0.764	0.857	6.27809e-07	Spinous-cell	FBXO7	FBXO7
RPN1	2.67949e-11	-0.574875	0.86	0.909	6.39808e-07	Spinous-cell	RPN1	RPN1
DEPDC7	2.80227e-11	-1.41694	0.137	0.284	6.69127e-07	Spinous-cell	DEPDC7	DEPDC7
ECT2	2.80515e-11	-1.86066	0.258	0.405	6.69814e-07	Spinous-cell	ECT2	ECT2
CISD1	2.91147e-11	-0.734452	0.699	0.822	6.952e-07	Spinous-cell	CISD1	CISD1
PPAP2C	2.96468e-11	1.03112	0.724	0.614	7.07907e-07	Spinous-cell	PPAP2C	PPAP2C
CTSK	2.97079e-11	-1.94395	0.294	0.452	7.09365e-07	Spinous-cell	CTSK	CTSK
RAMP1	3.01223e-11	-1.52812	0.152	0.313	7.1926e-07	Spinous-cell	RAMP1	RAMP1
SGOL1	3.0948e-11	-2.09767	0.054	0.172	7.38975e-07	Spinous-cell	SGOL1	SGOL1
KIT	3.1143e-11	-4.75739	0.21	0.357	7.43634e-07	Spinous-cell	KIT	KIT
CTSS	3.17875e-11	-2.11895	0.164	0.32	7.59023e-07	Spinous-cell	CTSS	CTSS
GNG11	3.17958e-11	-4.46188	0.095	0.226	7.59221e-07	Spinous-cell	GNG11	GNG11
TTC39A	3.21662e-11	2.53248	0.348	0.191	7.68064e-07	Spinous-cell	TTC39A	TTC39A
VRK1	3.22623e-11	-0.913999	0.324	0.483	7.70359e-07	Spinous-cell	VRK1	VRK1
COL6A2	3.26978e-11	-1.33407	0.156	0.311	7.80759e-07	Spinous-cell	COL6A2	COL6A2
ARHGEF40	3.27465e-11	-2.21613	0.118	0.259	7.81922e-07	Spinous-cell	ARHGEF40	ARHGEF40
XRRA1	3.27515e-11	-1.10994	0.13	0.282	7.82041e-07	Spinous-cell	XRRA1	XRRA1
WNT10A	3.34848e-11	-0.994345	0.186	0.346	7.9955e-07	Spinous-cell	WNT10A	WNT10A
DEPDC1B	3.37374e-11	-1.95349	0.069	0.193	8.05581e-07	Spinous-cell	DEPDC1B	DEPDC1B
CERS3	3.44002e-11	1.31714	0.713	0.612	8.21408e-07	Spinous-cell	CERS3	CERS3
LOC729732	3.56383e-11	-3.37377	0.051	0.166	8.5097e-07	Spinous-cell	LOC729732	LOC729732
TMOD1	3.60347e-11	-4.78138	0.032	0.133	8.60436e-07	Spinous-cell	TMOD1	TMOD1
CENPN	3.74802e-11	-1.08442	0.333	0.498	8.94953e-07	Spinous-cell	CENPN	CENPN
ARID5A	4.02642e-11	-1.5069	0.1	0.241	9.61428e-07	Spinous-cell	ARID5A	ARID5A
CLCC1	4.04115e-11	-0.51159	0.422	0.624	9.64946e-07	Spinous-cell	CLCC1	CLCC1
MESDC2	4.14553e-11	-0.547127	0.554	0.714	9.89869e-07	Spinous-cell	MESDC2	MESDC2
STT3A	4.28653e-11	-0.593375	0.69	0.809	1.02354e-06	Spinous-cell	STT3A	STT3A
CYBA	4.3637e-11	-1.67583	0.4	0.579	1.04197e-06	Spinous-cell	CYBA	CYBA
SNAPC2	4.39426e-11	-1.10385	0.353	0.519	1.04926e-06	Spinous-cell	SNAPC2	SNAPC2
HEY1	4.56901e-11	-2.92737	0.037	0.143	1.09099e-06	Spinous-cell	HEY1	HEY1
A2ML1	4.61877e-11	2.11222	0.445	0.293	1.10287e-06	Spinous-cell	A2ML1	A2ML1
RAD51	4.64206e-11	-2.02968	0.118	0.257	1.10843e-06	Spinous-cell	RAD51	RAD51
PIGT	4.69939e-11	-0.660256	0.506	0.685	1.12212e-06	Spinous-cell	PIGT	PIGT
AEBP1	4.70367e-11	-2.59852	0.113	0.251	1.12314e-06	Spinous-cell	AEBP1	AEBP1
SPTBN1	4.79e-11	-0.778057	0.819	0.905	1.14376e-06	Spinous-cell	SPTBN1	SPTBN1
SPAG5	4.95858e-11	-2.1572	0.078	0.207	1.18401e-06	Spinous-cell	SPAG5	SPAG5
RDH12	5.02054e-11	2.40801	0.357	0.203	1.1988e-06	Spinous-cell	RDH12	RDH12
CEP290	5.13363e-11	-0.668655	0.16	0.328	1.22581e-06	Spinous-cell	CEP290	CEP290
ODF2	5.28582e-11	-1.08144	0.351	0.523	1.26215e-06	Spinous-cell	ODF2	ODF2
LOC440700	5.338e-11	-3.59468	0.009	0.089	1.27461e-06	Spinous-cell	LOC440700	LOC440700
NR4A1	5.38152e-11	-0.760308	0.276	0.444	1.285e-06	Spinous-cell	NR4A1	NR4A1
TM7SF3	5.56128e-11	-0.625728	0.666	0.792	1.32792e-06	Spinous-cell	TM7SF3	TM7SF3
HAUS6	5.56701e-11	-0.845813	0.316	0.488	1.32929e-06	Spinous-cell	HAUS6	HAUS6
ST6GALNAC2	5.8e-11	-0.605561	0.756	0.871	1.38492e-06	Spinous-cell	ST6GALNAC2	ST6GALNAC2
FBLN7	5.9026e-11	-3.2307	0.021	0.114	1.40942e-06	Spinous-cell	FBLN7	FBLN7
RAB3D	6.16238e-11	0.90145	0.91	0.921	1.47145e-06	Spinous-cell	RAB3D	RAB3D
LY6G6C.1	6.2831e-11	3.34734	0.41	0.257	1.50028e-06	Spinous-cell	LY6G6C.1	LY6G6C
ANKRD36	6.37822e-11	-0.52722	0.184	0.353	1.52299e-06	Spinous-cell	ANKRD36	ANKRD36
NUF2	6.62444e-11	-1.85868	0.08	0.205	1.58178e-06	Spinous-cell	NUF2	NUF2
PRC1	6.62807e-11	-2.71022	0.278	0.421	1.58265e-06	Spinous-cell	PRC1	PRC1
WDR54	6.68888e-11	-0.615853	0.173	0.332	1.59717e-06	Spinous-cell	WDR54	WDR54
PGLYRP3	6.8805e-11	1.75239	0.477	0.313	1.64292e-06	Spinous-cell	PGLYRP3	PGLYRP3
GNG2	6.96089e-11	-3.90037	0.106	0.236	1.66212e-06	Spinous-cell	GNG2	GNG2
STXBP6	6.97093e-11	-0.651072	0.224	0.388	1.66452e-06	Spinous-cell	STXBP6	STXBP6
CA14	7.14206e-11	-4.51197	0.078	0.201	1.70538e-06	Spinous-cell	CA14	CA14
PVRL1	7.17885e-11	0.693825	0.936	0.876	1.71417e-06	Spinous-cell	PVRL1	PVRL1
BRD8	7.26688e-11	-0.658777	0.474	0.641	1.73519e-06	Spinous-cell	BRD8	BRD8
GLMP	7.28235e-11	-1.52937	0.454	0.62	1.73888e-06	Spinous-cell	GLMP	GLMP
SHISA4	7.35784e-11	-1.1796	0.11	0.251	1.7569e-06	Spinous-cell	SHISA4	SHISA4
HYLS1	7.74885e-11	-1.79639	0.103	0.241	1.85027e-06	Spinous-cell	HYLS1	HYLS1
CCDC64B	7.89049e-11	2.02936	0.281	0.129	1.88409e-06	Spinous-cell	CCDC64B	CCDC64B
LMO1	7.97277e-11	-0.683014	0.279	0.454	1.90374e-06	Spinous-cell	LMO1	LMO1
CENPF	8.15696e-11	-2.11064	0.184	0.336	1.94772e-06	Spinous-cell	CENPF	CENPF
PROM2	8.46118e-11	1.28869	0.785	0.668	2.02036e-06	Spinous-cell	PROM2	PROM2
CCDC80	8.51911e-11	-3.39792	0.129	0.264	2.03419e-06	Spinous-cell	CCDC80	CCDC80
C4orf46	8.68653e-11	-1.12462	0.103	0.239	2.07417e-06	Spinous-cell	C4orf46	C4orf46
NAALADL1	8.78952e-11	-2.91838	0.046	0.156	2.09876e-06	Spinous-cell	NAALADL1	NAALADL1
CLEC2D	8.79514e-11	-0.714028	0.199	0.375	2.1001e-06	Spinous-cell	CLEC2D	CLEC2D
CDKN1A	8.79581e-11	0.810338	0.808	0.741	2.10026e-06	Spinous-cell	CDKN1A	CDKN1A
BTG1	9.11468e-11	0.794435	0.969	0.963	2.1764e-06	Spinous-cell	BTG1	BTG1
DNAJC9	9.25708e-11	-1.0742	0.538	0.66	2.21041e-06	Spinous-cell	DNAJC9	DNAJC9
HERC2	9.28383e-11	-2.18382	0.528	0.691	2.21679e-06	Spinous-cell	HERC2	HERC2
FRZB	9.39532e-11	-2.03419	0.109	0.239	2.24342e-06	Spinous-cell	FRZB	FRZB
TRPM1.2	9.65504e-11	-5.3675	0.124	0.255	2.30543e-06	Spinous-cell	TRPM1.2	TRPM1
MMP17	9.95265e-11	-3.38574	0.064	0.183	2.37649e-06	Spinous-cell	MMP17	MMP17
EDNRB	1.03872e-10	-4.8473	0.133	0.268	2.48026e-06	Spinous-cell	EDNRB	EDNRB
KU-MEL-3	1.04521e-10	-2.81142	0.006	0.079	2.49574e-06	Spinous-cell	KU-MEL-3	KU-MEL-3
SLC29A1	1.04798e-10	-1.3848	0.5	0.662	2.50236e-06	Spinous-cell	SLC29A1	SLC29A1
CDK1	1.05745e-10	-3.2613	0.215	0.355	2.52498e-06	Spinous-cell	CDK1	CDK1
ASPM	1.08012e-10	-2.82299	0.106	0.241	2.5791e-06	Spinous-cell	ASPM	ASPM
APOD	1.0983e-10	-4.46976	0.153	0.292	2.62252e-06	Spinous-cell	APOD	APOD
TROAP	1.13443e-10	-1.78243	0.123	0.264	2.7088e-06	Spinous-cell	TROAP	TROAP
MC1R	1.1348e-10	-4.74066	0.101	0.23	2.70966e-06	Spinous-cell	MC1R	MC1R
RFC3	1.14617e-10	-1.51781	0.181	0.334	2.73682e-06	Spinous-cell	RFC3	RFC3
CTSO.1	1.14846e-10	-0.70199	0.181	0.338	2.7423e-06	Spinous-cell	CTSO.1	CTSO
EXTL2	1.16763e-10	-1.0038	0.209	0.363	2.78807e-06	Spinous-cell	EXTL2	EXTL2
RACGAP1P	1.19181e-10	-2.33387	0.054	0.168	2.8458e-06	Spinous-cell	RACGAP1P	RACGAP1P
STX7	1.20368e-10	-1.23207	0.54	0.703	2.87414e-06	Spinous-cell	STX7	STX7
PRNP	1.22307e-10	-0.506855	0.922	0.973	2.92046e-06	Spinous-cell	PRNP	PRNP
ZWINT	1.24754e-10	-2.05618	0.313	0.456	2.97888e-06	Spinous-cell	ZWINT	ZWINT
SH3BP4	1.25296e-10	-0.957931	0.368	0.537	2.99183e-06	Spinous-cell	SH3BP4	SH3BP4
LPL	1.25823e-10	-2.58817	0.026	0.12	3.00441e-06	Spinous-cell	LPL	LPL
HELLS	1.26762e-10	-1.07887	0.118	0.261	3.02683e-06	Spinous-cell	HELLS	HELLS
SPECC1	1.41811e-10	-1.76505	0.17	0.317	3.38617e-06	Spinous-cell	SPECC1	SPECC1
C16orf59	1.43324e-10	-2.14863	0.031	0.129	3.42229e-06	Spinous-cell	C16orf59	C16orf59
ZGRF1	1.43629e-10	-1.5606	0.057	0.172	3.42958e-06	Spinous-cell	ZGRF1	ZGRF1
SLC25A38	1.50066e-10	-0.735032	0.276	0.448	3.58328e-06	Spinous-cell	SLC25A38	SLC25A38
PDE6D	1.50507e-10	-0.825839	0.431	0.597	3.59381e-06	Spinous-cell	PDE6D	PDE6D
MAP1LC3B	1.56595e-10	-0.591786	0.761	0.869	3.73918e-06	Spinous-cell	MAP1LC3B	MAP1LC3B
HMMR	1.61471e-10	-4.10238	0.054	0.164	3.8556e-06	Spinous-cell	HMMR	HMMR
EME1	1.68798e-10	-0.623444	0.017	0.102	4.03055e-06	Spinous-cell	EME1	EME1
ECM1	1.70002e-10	-1.03867	0.44	0.597	4.05931e-06	Spinous-cell	ECM1	ECM1
TTL	1.70687e-10	-0.614963	0.433	0.602	4.07566e-06	Spinous-cell	TTL	TTL
ST8SIA6	1.71057e-10	1.05108	0.012	0.093	4.08449e-06	Spinous-cell	ST8SIA6	ST8SIA6
IFT81	1.90154e-10	-0.737611	0.199	0.361	4.5405e-06	Spinous-cell	IFT81	IFT81
HMG20B	1.92003e-10	-1.48333	0.762	0.867	4.58465e-06	Spinous-cell	HMG20B	HMG20B
ORC6	1.94498e-10	-2.0107	0.094	0.222	4.64423e-06	Spinous-cell	ORC6	ORC6
EXO1	1.96121e-10	-2.45073	0.054	0.164	4.68298e-06	Spinous-cell	EXO1	EXO1
ANO6	1.97819e-10	-0.728385	0.515	0.649	4.72352e-06	Spinous-cell	ANO6	ANO6
CCNB2	1.99545e-10	-3.09794	0.156	0.297	4.76475e-06	Spinous-cell	CCNB2	CCNB2
CKAP2L	2.06477e-10	-3.06417	0.043	0.149	4.93026e-06	Spinous-cell	CKAP2L	CKAP2L
RHOBTB2	2.0851e-10	-2.87517	0.074	0.195	4.97881e-06	Spinous-cell	RHOBTB2	RHOBTB2
CLU	2.18063e-10	-1.36811	0.267	0.425	5.2069e-06	Spinous-cell	CLU	CLU
COL4A2	2.18484e-10	-2.69438	0.058	0.172	5.21696e-06	Spinous-cell	COL4A2	COL4A2
SLC2A5	2.21676e-10	-1.05389	0.066	0.183	5.29317e-06	Spinous-cell	SLC2A5	SLC2A5
NUSAP1	2.23058e-10	-3.55794	0.287	0.44	5.32618e-06	Spinous-cell	NUSAP1	NUSAP1
EFNA3	2.23764e-10	1.0532	0.77	0.653	5.34304e-06	Spinous-cell	EFNA3	EFNA3
CMTM3	2.2736e-10	-1.42811	0.132	0.276	5.4289e-06	Spinous-cell	CMTM3	CMTM3
KCNAB2	2.27957e-10	-3.80361	0.193	0.334	5.44315e-06	Spinous-cell	KCNAB2	KCNAB2
KIF2C	2.29038e-10	-2.90406	0.097	0.226	5.46897e-06	Spinous-cell	KIF2C	KIF2C
TMEM107	2.37724e-10	-0.547492	0.348	0.533	5.67637e-06	Spinous-cell	TMEM107	TMEM107
TP73	2.41559e-10	-0.919287	0.121	0.264	5.76795e-06	Spinous-cell	TP73	TP73
PDLIM1	2.51851e-10	-0.582853	0.926	0.934	6.0137e-06	Spinous-cell	PDLIM1	PDLIM1
SDK2	2.56226e-10	-1.38101	0.16	0.301	6.11816e-06	Spinous-cell	SDK2	SDK2
KIF24	2.61115e-10	-2.00184	0.029	0.124	6.23492e-06	Spinous-cell	KIF24	KIF24
MAD2L1BP	2.6747e-10	-0.642793	0.325	0.5	6.38666e-06	Spinous-cell	MAD2L1BP	MAD2L1BP
SIGIRR	2.70169e-10	-1.2649	0.233	0.386	6.45109e-06	Spinous-cell	SIGIRR	SIGIRR
NCAPG	2.88233e-10	-1.71235	0.094	0.22	6.88243e-06	Spinous-cell	NCAPG	NCAPG
RHOC	2.94864e-10	-0.599525	0.876	0.936	7.04076e-06	Spinous-cell	RHOC	RHOC
GRHL3	2.98482e-10	1.44093	0.601	0.488	7.12716e-06	Spinous-cell	GRHL3	GRHL3
IAH1	2.98537e-10	-0.538511	0.488	0.658	7.12846e-06	Spinous-cell	IAH1	IAH1
KIF18B	3.00117e-10	-0.703394	0.058	0.172	7.16618e-06	Spinous-cell	KIF18B	KIF18B
PLXNC1	3.0623e-10	-3.38924	0.133	0.264	7.31216e-06	Spinous-cell	PLXNC1	PLXNC1
CCL28	3.10732e-10	-1.13603	0.204	0.361	7.41967e-06	Spinous-cell	CCL28	CCL28
MAF	3.21905e-10	0.828339	0.956	0.931	7.68645e-06	Spinous-cell	MAF	MAF
ERAP1	3.22297e-10	-0.654335	0.603	0.745	7.6958e-06	Spinous-cell	ERAP1	ERAP1
PLLP	3.23901e-10	1.33612	0.583	0.452	7.73412e-06	Spinous-cell	PLLP	PLLP
NUDT1	3.42932e-10	-0.686557	0.615	0.759	8.18853e-06	Spinous-cell	NUDT1	NUDT1
WLS	3.44099e-10	-0.530157	0.71	0.842	8.21639e-06	Spinous-cell	WLS	WLS
WDR63	3.49e-10	-4.40634	0.044	0.147	8.33341e-06	Spinous-cell	WDR63	WDR63
ANP32D	3.54853e-10	-1.40286	0.044	0.151	8.47319e-06	Spinous-cell	ANP32D	ANP32D
SFTPC	3.56808e-10	-4.72981	0.02	0.104	8.51986e-06	Spinous-cell	SFTPC	SFTPC
ARHGEF6	3.71455e-10	-1.73715	0.048	0.156	8.8696e-06	Spinous-cell	ARHGEF6	ARHGEF6
IRF1	3.81926e-10	-0.931777	0.391	0.552	9.11963e-06	Spinous-cell	IRF1	IRF1
RND3	3.97235e-10	-1.3655	0.554	0.716	9.48517e-06	Spinous-cell	RND3	RND3
CEBPA	4.23308e-10	1.56124	0.732	0.614	1.01078e-05	Spinous-cell	CEBPA	CEBPA
PAG1	4.23605e-10	-2.72919	0.181	0.322	1.01148e-05	Spinous-cell	PAG1	PAG1
CDC6	4.34928e-10	-2.11098	0.109	0.237	1.03852e-05	Spinous-cell	CDC6	CDC6
FADS1	4.49214e-10	-3.21068	0.1	0.222	1.07263e-05	Spinous-cell	FADS1	FADS1
NDC80	4.49397e-10	-0.79004	0.072	0.187	1.07307e-05	Spinous-cell	NDC80	NDC80
CDC25C	4.68326e-10	-3.15661	0.029	0.122	1.11827e-05	Spinous-cell	CDC25C	CDC25C
PRIM1	4.78294e-10	-0.952113	0.129	0.272	1.14207e-05	Spinous-cell	PRIM1	PRIM1
CKLF	4.91913e-10	-1.08491	0.362	0.529	1.17459e-05	Spinous-cell	CKLF	CKLF
TNS3	5.1081e-10	-1.07006	0.183	0.334	1.21971e-05	Spinous-cell	TNS3	TNS3
RGS10	5.15202e-10	-1.59361	0.293	0.452	1.2302e-05	Spinous-cell	RGS10	RGS10
CDCA4	5.18951e-10	-0.766122	0.594	0.716	1.23915e-05	Spinous-cell	CDCA4	CDCA4
PQLC3	5.28707e-10	-0.790067	0.419	0.568	1.26245e-05	Spinous-cell	PQLC3	PQLC3
ESPN	5.55186e-10	1.84314	0.488	0.326	1.32567e-05	Spinous-cell	ESPN	ESPN
MTFR1L	5.61558e-10	-0.526731	0.509	0.67	1.34089e-05	Spinous-cell	MTFR1L	MTFR1L
PC	5.62202e-10	-1.21405	0.232	0.386	1.34243e-05	Spinous-cell	PC	PC
ANLN	5.67592e-10	-2.08242	0.184	0.324	1.3553e-05	Spinous-cell	ANLN	ANLN
SMIM10	5.80198e-10	-4.05477	0.018	0.1	1.3854e-05	Spinous-cell	SMIM10	SMIM10
ADAM9.2	5.80769e-10	-0.666593	0.463	0.624	1.38676e-05	Spinous-cell	ADAM9.2	ADAM9
XPC	6.08988e-10	-0.618476	0.549	0.699	1.45414e-05	Spinous-cell	XPC	XPC
PLEKHN1	6.11604e-10	1.70506	0.575	0.427	1.46039e-05	Spinous-cell	PLEKHN1	PLEKHN1
POC1A	6.18832e-10	-2.24474	0.121	0.251	1.47765e-05	Spinous-cell	POC1A	POC1A
OSER1	6.24147e-10	-0.724781	0.52	0.689	1.49034e-05	Spinous-cell	OSER1	OSER1
DTX3	6.38427e-10	-0.588818	0.181	0.338	1.52444e-05	Spinous-cell	DTX3	DTX3
ARNT2	6.42465e-10	-5.73428	0.041	0.139	1.53408e-05	Spinous-cell	ARNT2	ARNT2
RAD51C	6.51585e-10	-0.54075	0.33	0.498	1.55586e-05	Spinous-cell	RAD51C	RAD51C
PPDPF	6.54924e-10	0.665907	0.983	0.998	1.56383e-05	Spinous-cell	PPDPF	PPDPF
DHCR24	6.6071e-10	0.970584	0.929	0.919	1.57764e-05	Spinous-cell	DHCR24	DHCR24
CREB3	6.78192e-10	-0.561401	0.396	0.552	1.61939e-05	Spinous-cell	CREB3	CREB3
OLFM1	6.80042e-10	-1.7145	0.097	0.22	1.62381e-05	Spinous-cell	OLFM1	OLFM1
TMEM106C	6.90016e-10	-0.77503	0.603	0.718	1.64762e-05	Spinous-cell	TMEM106C	TMEM106C
LOC101928358	7.09721e-10	-3.08163	0.009	0.081	1.69467e-05	Spinous-cell	LOC101928358	LOC101928358
QPRT	7.22321e-10	-1.86207	0.031	0.124	1.72476e-05	Spinous-cell	QPRT	QPRT
CDKN3	7.39332e-10	-2.05557	0.143	0.284	1.76538e-05	Spinous-cell	CDKN3	CDKN3
TIMELESS	7.433e-10	-1.38728	0.213	0.355	1.77485e-05	Spinous-cell	TIMELESS	TIMELESS
HMGB1	7.53535e-10	-0.562942	0.972	0.992	1.79929e-05	Spinous-cell	HMGB1	HMGB1
FGFBP2	7.56837e-10	-3.29459	0.018	0.1	1.80717e-05	Spinous-cell	FGFBP2	FGFBP2
GEN1	7.63732e-10	-1.00184	0.161	0.311	1.82364e-05	Spinous-cell	GEN1	GEN1
LSAMP	7.92486e-10	-2.14931	0.089	0.208	1.8923e-05	Spinous-cell	LSAMP	LSAMP
RFWD3	8.03478e-10	-0.871187	0.37	0.515	1.91855e-05	Spinous-cell	RFWD3	RFWD3
DPP9	8.18775e-10	-0.638933	0.535	0.664	1.95507e-05	Spinous-cell	DPP9	DPP9
ACADM	8.48397e-10	-0.536986	0.511	0.662	2.0258e-05	Spinous-cell	ACADM	ACADM
CYYR1	8.50154e-10	-0.557175	0.11	0.243	2.03e-05	Spinous-cell	CYYR1	CYYR1
CYP2U1	8.58954e-10	-3.99675	0.034	0.127	2.05101e-05	Spinous-cell	CYP2U1	CYP2U1
KRT31.1	8.73097e-10	-1.2546	0.35	0.5	2.08478e-05	Spinous-cell	KRT31.1	KRT31
LIG1	8.77237e-10	-0.935123	0.44	0.597	2.09467e-05	Spinous-cell	LIG1	LIG1
BCAN	8.98937e-10	-5.16861	0.11	0.234	2.14648e-05	Spinous-cell	BCAN	BCAN
NAV1	9.00385e-10	-0.564254	0.411	0.575	2.14994e-05	Spinous-cell	NAV1	NAV1
VAV2	9.52015e-10	-1.58828	0.144	0.284	2.27322e-05	Spinous-cell	VAV2	VAV2
BRIP1	9.84103e-10	-0.903111	0.064	0.176	2.34984e-05	Spinous-cell	BRIP1	BRIP1
HSD17B14	9.94818e-10	-3.51846	0.044	0.143	2.37543e-05	Spinous-cell	HSD17B14	HSD17B14
MX2	9.97574e-10	-3.34207	0.069	0.18	2.38201e-05	Spinous-cell	MX2	MX2
GPRC5B	1.08702e-09	-3.0933	0.023	0.108	2.59558e-05	Spinous-cell	GPRC5B	GPRC5B
PTPRJ	1.09421e-09	-2.33155	0.11	0.237	2.61276e-05	Spinous-cell	PTPRJ	PTPRJ
ATP1B1	1.10168e-09	-0.692262	0.305	0.454	2.63059e-05	Spinous-cell	ATP1B1	ATP1B1
CDR2L	1.10797e-09	-1.59885	0.089	0.208	2.64562e-05	Spinous-cell	CDR2L	CDR2L
NIPA2	1.12879e-09	-0.698345	0.508	0.658	2.69532e-05	Spinous-cell	NIPA2	NIPA2
GAS6	1.2277e-09	-0.533252	0.848	0.95	2.93151e-05	Spinous-cell	GAS6	GAS6
ADAMTS1	1.22882e-09	-2.13903	0.129	0.263	2.93418e-05	Spinous-cell	ADAMTS1	ADAMTS1
MIR6505	1.2657e-09	-3.765	0.046	0.147	3.02224e-05	Spinous-cell	MIR6505	MIR6505
HIST1H3B	1.27132e-09	-2.6188	0.035	0.129	3.03566e-05	Spinous-cell	HIST1H3B	HIST1H3B
CRYAB	1.2828e-09	-0.678967	0.626	0.743	3.06308e-05	Spinous-cell	CRYAB	CRYAB
SCNN1A	1.30026e-09	1.99453	0.416	0.268	3.10475e-05	Spinous-cell	SCNN1A	SCNN1A
ANO1	1.30257e-09	1.33722	0.679	0.571	3.11027e-05	Spinous-cell	ANO1	ANO1
CHN2	1.30851e-09	-2.97723	0.028	0.116	3.12447e-05	Spinous-cell	CHN2	CHN2
GRAMD3	1.32379e-09	-1.13106	0.288	0.438	3.16094e-05	Spinous-cell	GRAMD3	GRAMD3
2026-09-11	1.33146e-09	-1.07341	0.189	0.33	3.17927e-05	Spinous-cell	2026-09-11	2026-09-11
FAM46B	1.39754e-09	1.00675	0.799	0.708	3.33705e-05	Spinous-cell	FAM46B	FAM46B
PRSS23	1.42469e-09	-3.37743	0.258	0.392	3.40186e-05	Spinous-cell	PRSS23	PRSS23
RAB40C	1.43001e-09	1.37441	0.66	0.529	3.41458e-05	Spinous-cell	RAB40C	RAB40C
ANKRD44	1.44501e-09	-1.10341	0.084	0.201	3.45038e-05	Spinous-cell	ANKRD44	ANKRD44
SH3GLB2	1.46682e-09	1.74687	0.762	0.687	3.50247e-05	Spinous-cell	SH3GLB2	SH3GLB2
HNRNPLL	1.47227e-09	-0.66102	0.383	0.552	3.51549e-05	Spinous-cell	HNRNPLL	HNRNPLL
ABCA1	1.51266e-09	-0.613046	0.592	0.726	3.61194e-05	Spinous-cell	ABCA1	ABCA1
HSPA2	1.55289e-09	-0.559804	0.597	0.743	3.70799e-05	Spinous-cell	HSPA2	HSPA2
EXOC2	1.58983e-09	-0.69919	0.376	0.552	3.7962e-05	Spinous-cell	EXOC2	EXOC2
IGFLR1	1.59651e-09	-2.40042	0.095	0.216	3.81215e-05	Spinous-cell	IGFLR1	IGFLR1
ESCO2	1.63272e-09	-1.58303	0.032	0.124	3.8986e-05	Spinous-cell	ESCO2	ESCO2
GPM6B	1.64395e-09	-4.50782	0.215	0.351	3.92541e-05	Spinous-cell	GPM6B	GPM6B
SMC4	1.66187e-09	-1.18521	0.523	0.647	3.96822e-05	Spinous-cell	SMC4	SMC4
PLP1	1.66771e-09	-4.16196	0.202	0.334	3.98215e-05	Spinous-cell	PLP1	PLP1
MSH2	1.6849e-09	-0.907002	0.339	0.486	4.02321e-05	Spinous-cell	MSH2	MSH2
IGFBP7	1.69014e-09	-4.46142	0.34	0.473	4.03573e-05	Spinous-cell	IGFBP7	IGFBP7
CDC45	1.69345e-09	-2.72012	0.12	0.245	4.04362e-05	Spinous-cell	CDC45	CDC45
ARHGEF39	1.70623e-09	-0.866891	0.331	0.475	4.07413e-05	Spinous-cell	ARHGEF39	ARHGEF39
INPP4B	1.73728e-09	-2.29973	0.149	0.28	4.14828e-05	Spinous-cell	INPP4B	INPP4B
ADCY2	1.75057e-09	-1.35159	0.117	0.247	4.18002e-05	Spinous-cell	ADCY2	ADCY2
DGKD	1.83852e-09	-1.85114	0.1	0.228	4.39001e-05	Spinous-cell	DGKD	DGKD
DHTKD1	1.86764e-09	-0.918835	0.282	0.442	4.45956e-05	Spinous-cell	DHTKD1	DHTKD1
SMCO4	1.90682e-09	-0.65736	0.176	0.324	4.55311e-05	Spinous-cell	SMCO4	SMCO4
TRIQK	1.94717e-09	-0.804005	0.183	0.328	4.64946e-05	Spinous-cell	TRIQK	TRIQK
WNT7A	1.94823e-09	-1.54518	0.115	0.241	4.65199e-05	Spinous-cell	WNT7A	WNT7A
LIPA	1.97476e-09	-1.16307	0.511	0.66	4.71534e-05	Spinous-cell	LIPA	LIPA
PTTG1	2.06953e-09	-1.74382	0.491	0.61	4.94163e-05	Spinous-cell	PTTG1	PTTG1
KAL1	2.10499e-09	-0.71265	0.141	0.276	5.02628e-05	Spinous-cell	KAL1	KAL1
ALDH3B1	2.19323e-09	-1.53196	0.408	0.241	5.237e-05	Spinous-cell	ALDH3B1	ALDH3B1
NEK2	2.22084e-09	-2.00684	0.048	0.147	5.30292e-05	Spinous-cell	NEK2	NEK2
GNAO1	2.23447e-09	-2.54251	0.043	0.141	5.33548e-05	Spinous-cell	GNAO1	GNAO1
MCM8	2.24026e-09	-1.43735	0.08	0.197	5.34929e-05	Spinous-cell	MCM8	MCM8
AAED1	2.26725e-09	-1.35785	0.201	0.349	5.41374e-05	Spinous-cell	AAED1	AAED1
CDT1	2.30297e-09	-1.14638	0.186	0.328	5.49904e-05	Spinous-cell	CDT1	CDT1
LGALS9C	2.34507e-09	-1.67702	0.038	0.133	5.59956e-05	Spinous-cell	LGALS9C	LGALS9C
CCNB1	2.38377e-09	-3.02167	0.239	0.376	5.69197e-05	Spinous-cell	CCNB1	CCNB1
IFFO1	2.38398e-09	-1.42202	0.049	0.149	5.69247e-05	Spinous-cell	IFFO1	IFFO1
STK10	2.43062e-09	-1.64042	0.103	0.226	5.80382e-05	Spinous-cell	STK10	STK10
CYP4B1	2.50571e-09	2.47576	0.241	0.114	5.98314e-05	Spinous-cell	CYP4B1	CYP4B1
RFC4	2.53412e-09	-1.07471	0.239	0.388	6.05098e-05	Spinous-cell	RFC4	RFC4
FAM72A	2.62613e-09	-3.98515	0.002	0.058	6.27068e-05	Spinous-cell	FAM72A	FAM72A
ZYX	2.71248e-09	-0.748842	0.652	0.766	6.47686e-05	Spinous-cell	ZYX	ZYX
GTF2F2	2.73774e-09	-0.881379	0.561	0.71	6.53717e-05	Spinous-cell	GTF2F2	GTF2F2
SKA1.1	2.74148e-09	-2.99478	0.052	0.153	6.5461e-05	Spinous-cell	SKA1.1	SKA1
MOK	2.81931e-09	-1.91688	0.179	0.319	6.73195e-05	Spinous-cell	MOK	MOK
BDKRB2	2.82335e-09	-0.765006	0.232	0.38	6.7416e-05	Spinous-cell	BDKRB2	BDKRB2
TMEM47	2.87266e-09	-2.52885	0.037	0.129	6.85934e-05	Spinous-cell	TMEM47	TMEM47
NEIL3	2.8962e-09	-1.33357	0.046	0.143	6.91555e-05	Spinous-cell	NEIL3	NEIL3
PLEK2	2.91509e-09	-0.827888	0.523	0.629	6.96064e-05	Spinous-cell	PLEK2	PLEK2
TTC3P1	2.92683e-09	-0.514209	0.275	0.432	6.98868e-05	Spinous-cell	TTC3P1	TTC3P1
METTL21A	3.01023e-09	-0.65154	0.156	0.301	7.18783e-05	Spinous-cell	METTL21A	METTL21A
AURKAPS1	3.05046e-09	-1.28055	0.031	0.12	7.28389e-05	Spinous-cell	AURKAPS1	AURKAPS1
SCARA3	3.05767e-09	-0.880239	0.086	0.203	7.30112e-05	Spinous-cell	SCARA3	SCARA3
LGI3	3.17117e-09	-4.48995	0.084	0.193	7.57212e-05	Spinous-cell	LGI3	LGI3
RGS3	3.44834e-09	-2.1084	0.227	0.361	8.23394e-05	Spinous-cell	RGS3	RGS3
SOX10	3.60492e-09	-4.0144	0.097	0.21	8.60782e-05	Spinous-cell	SOX10	SOX10
ENDOU	3.64035e-09	2.35983	0.218	0.095	8.69243e-05	Spinous-cell	ENDOU	ENDOU
SLC6A17	3.64719e-09	-3.57825	0.081	0.191	8.70875e-05	Spinous-cell	SLC6A17	SLC6A17
CIT	3.76849e-09	-2.00647	0.11	0.232	8.9984e-05	Spinous-cell	CIT	CIT
MAN2B1	3.99236e-09	-0.527689	0.472	0.61	9.53296e-05	Spinous-cell	MAN2B1	MAN2B1
MUC15	4.13116e-09	1.51154	0.334	0.189	9.86437e-05	Spinous-cell	MUC15	MUC15
ABHD12	4.15024e-09	-0.885254	0.457	0.612	9.90995e-05	Spinous-cell	ABHD12	ABHD12
BLOC1S6	4.25393e-09	-0.958834	0.54	0.672	0.000101575	Spinous-cell	BLOC1S6	BLOC1S6
PRSS3	4.32151e-09	1.0066	0.643	0.542	0.000103189	Spinous-cell	PRSS3	PRSS3
TNNT1	4.33033e-09	-0.685053	0.459	0.616	0.0001034	Spinous-cell	TNNT1	TNNT1
GINS2	4.3399e-09	-0.548354	0.167	0.305	0.000103628	Spinous-cell	GINS2	GINS2
SCMH1	4.43203e-09	-0.720467	0.215	0.359	0.000105828	Spinous-cell	SCMH1	SCMH1
EPB41L2	4.47174e-09	-1.09428	0.092	0.212	0.000106776	Spinous-cell	EPB41L2	EPB41L2
BUB1	4.4815e-09	-1.74352	0.072	0.181	0.000107009	Spinous-cell	BUB1	BUB1
SPRED1	4.53459e-09	-1.11562	0.287	0.434	0.000108277	Spinous-cell	SPRED1	SPRED1
TNFRSF10B	4.57712e-09	-1.08507	0.241	0.382	0.000109292	Spinous-cell	TNFRSF10B	TNFRSF10B
CLSPN	4.81814e-09	-1.52483	0.138	0.263	0.000115048	Spinous-cell	CLSPN	CLSPN
LAMB2	4.81947e-09	-0.759871	0.557	0.695	0.000115079	Spinous-cell	LAMB2	LAMB2
TMEM97	4.91089e-09	-0.823487	0.242	0.394	0.000117262	Spinous-cell	TMEM97	TMEM97
APBA2.1	4.97758e-09	-2.98113	0.038	0.129	0.000118855	Spinous-cell	APBA2.1	APBA2
ZNF467	5.04043e-09	1.80324	0.221	0.095	0.000120355	Spinous-cell	ZNF467	ZNF467
LGMN	5.1229e-09	-0.536982	0.463	0.614	0.000122325	Spinous-cell	LGMN	LGMN
RECQL	5.20175e-09	-0.905359	0.313	0.461	0.000124207	Spinous-cell	RECQL	RECQL
ETHE1	5.25901e-09	-0.556685	0.475	0.651	0.000125575	Spinous-cell	ETHE1	ETHE1
EHF	5.28212e-09	0.883456	0.851	0.786	0.000126126	Spinous-cell	EHF	EHF
APP	5.28663e-09	-0.517634	0.67	0.786	0.000126234	Spinous-cell	APP	APP
PRR11	5.40293e-09	-1.15963	0.146	0.278	0.000129011	Spinous-cell	PRR11	PRR11
SLPI	5.51399e-09	2.01886	0.805	0.757	0.000131663	Spinous-cell	SLPI	SLPI
PARP4	5.51431e-09	-0.546918	0.373	0.529	0.000131671	Spinous-cell	PARP4	PARP4
SULT2B1	5.66079e-09	2.04767	0.549	0.442	0.000135168	Spinous-cell	SULT2B1	SULT2B1
TRIM63	5.72133e-09	-4.51966	0.02	0.097	0.000136614	Spinous-cell	TRIM63	TRIM63
H2AFV	5.72174e-09	-0.632801	0.689	0.815	0.000136624	Spinous-cell	H2AFV	H2AFV
LINC00632	5.82735e-09	-2.44644	0.014	0.085	0.000139145	Spinous-cell	LINC00632	LINC00632
INF2	6.01102e-09	-0.602971	0.46	0.616	0.000143531	Spinous-cell	INF2	INF2
DAPK1	6.05821e-09	-1.92612	0.101	0.22	0.000144658	Spinous-cell	DAPK1	DAPK1
UBE2T	6.30498e-09	-1.20121	0.248	0.384	0.00015055	Spinous-cell	UBE2T	UBE2T
BID	6.33345e-09	-0.71859	0.186	0.33	0.00015123	Spinous-cell	BID	BID
IFT172	6.43704e-09	-0.643403	0.204	0.353	0.000153704	Spinous-cell	IFT172	IFT172
TRAIP	6.53335e-09	-1.61285	0.081	0.195	0.000156003	Spinous-cell	TRAIP	TRAIP
PDZK1IP1	6.60218e-09	1.2627	0.658	0.562	0.000157647	Spinous-cell	PDZK1IP1	PDZK1IP1
PTPRF	6.62754e-09	0.89761	0.963	0.934	0.000158252	Spinous-cell	PTPRF	PTPRF
GCC1	6.78626e-09	-1.29831	0.271	0.419	0.000162042	Spinous-cell	GCC1	GCC1
TRIM2	7.09738e-09	-2.55212	0.181	0.315	0.000169471	Spinous-cell	TRIM2	TRIM2
RACGAP1	7.10202e-09	-1.70451	0.189	0.319	0.000169582	Spinous-cell	RACGAP1	RACGAP1
BCHE	7.42418e-09	-1.5626	0.095	0.212	0.000177275	Spinous-cell	BCHE	BCHE
VIM	7.49695e-09	-3.57974	0.623	0.695	0.000179012	Spinous-cell	VIM	VIM
PRELID2	7.53254e-09	-0.995415	0.118	0.243	0.000179862	Spinous-cell	PRELID2	PRELID2
CLN5	7.55859e-09	-0.849935	0.382	0.539	0.000180484	Spinous-cell	CLN5	CLN5
MAGI2-AS3	7.7481e-09	-1.55816	0.034	0.12	0.000185009	Spinous-cell	MAGI2-AS3	MAGI2-AS3
NDC1	7.79191e-09	-0.627546	0.284	0.44	0.000186055	Spinous-cell	NDC1	NDC1
ARMC9	7.82072e-09	-2.44288	0.103	0.218	0.000186743	Spinous-cell	ARMC9	ARMC9
PREX1	8.02537e-09	-2.0582	0.049	0.145	0.00019163	Spinous-cell	PREX1	PREX1
ATP6V1C1	8.03493e-09	0.634092	0.436	0.595	0.000191858	Spinous-cell	ATP6V1C1	ATP6V1C1
RXRG	8.09793e-09	-6.9594	0.02	0.095	0.000193362	Spinous-cell	RXRG	RXRG
HMGB2	8.12776e-09	-2.18008	0.724	0.801	0.000194075	Spinous-cell	HMGB2	HMGB2
ORC1	8.318e-09	-1.0936	0.087	0.199	0.000198617	Spinous-cell	ORC1	ORC1
PLSCR4	8.43016e-09	-0.871209	0.181	0.33	0.000201295	Spinous-cell	PLSCR4	PLSCR4
TUBB4A	8.54766e-09	-4.82726	0.087	0.195	0.000204101	Spinous-cell	TUBB4A	TUBB4A
THNSL2	8.59877e-09	-0.599373	0.221	0.361	0.000205321	Spinous-cell	THNSL2	THNSL2
HES1	8.73424e-09	1.08439	0.876	0.878	0.000208556	Spinous-cell	HES1	HES1
PCSK2	8.83228e-09	-4.69124	0.224	0.349	0.000210897	Spinous-cell	PCSK2	PCSK2
CLCA4	8.98629e-09	2.42648	0.382	0.247	0.000214575	Spinous-cell	CLCA4	CLCA4
GNG7	9.00332e-09	-0.738467	0.063	0.168	0.000214981	Spinous-cell	GNG7	GNG7
S100A1	9.06675e-09	-4.55706	0.071	0.176	0.000216496	Spinous-cell	S100A1	S100A1
PRIM2	9.16167e-09	-0.527474	0.141	0.28	0.000218762	Spinous-cell	PRIM2	PRIM2
FAM65A	9.16689e-09	-1.07273	0.241	0.384	0.000218887	Spinous-cell	FAM65A	FAM65A
LINC00681	9.23389e-09	-2.06104	0.034	0.122	0.000220487	Spinous-cell	LINC00681	LINC00681
FN1	9.29337e-09	-3.71004	0.144	0.266	0.000221907	Spinous-cell	FN1	FN1
MIR211.1	9.47267e-09	-7.79046	0.002	0.054	0.000226188	Spinous-cell	MIR211.1	MIR211
TRAF2	9.6077e-09	-0.612408	0.337	0.492	0.000229413	Spinous-cell	TRAF2	TRAF2
ATP6AP1	9.62551e-09	-0.732879	0.816	0.909	0.000229838	Spinous-cell	ATP6AP1	ATP6AP1
IRS4	1.02499e-08	-9.18516	0.003	0.058	0.000244746	Spinous-cell	IRS4	IRS4
TRO	1.04921e-08	-1.6439	0.04	0.129	0.000250529	Spinous-cell	TRO	TRO
SEL1L	1.06614e-08	-0.834107	0.598	0.722	0.000254573	Spinous-cell	SEL1L	SEL1L
MIR6779	1.07975e-08	-0.880014	0.083	0.197	0.000257822	Spinous-cell	MIR6779	MIR6779
DERA	1.11019e-08	-0.81108	0.69	0.813	0.000265092	Spinous-cell	DERA	DERA
CDK2AP2	1.14922e-08	-0.619119	0.535	0.66	0.000274411	Spinous-cell	CDK2AP2	CDK2AP2
EVPL	1.15792e-08	1.19043	0.842	0.782	0.000276488	Spinous-cell	EVPL	EVPL
NAGK	1.18639e-08	1.13239	0.782	0.776	0.000283286	Spinous-cell	NAGK	NAGK
C5orf30	1.20507e-08	-1.60423	0.229	0.367	0.000287747	Spinous-cell	C5orf30	C5orf30
HYOU1	1.22488e-08	-0.631735	0.463	0.61	0.000292478	Spinous-cell	HYOU1	HYOU1
EXTL3	1.24161e-08	-0.641879	0.396	0.541	0.000296473	Spinous-cell	EXTL3	EXTL3
TTK	1.28699e-08	-1.46148	0.078	0.187	0.000307308	Spinous-cell	TTK	TTK
FAM92A1	1.29359e-08	-0.592728	0.149	0.284	0.000308884	Spinous-cell	FAM92A1	FAM92A1
GUCY1B3	1.30319e-08	-7.15099	0.026	0.104	0.000311175	Spinous-cell	GUCY1B3	GUCY1B3
EIF2AK2	1.3066e-08	-0.561809	0.261	0.405	0.000311991	Spinous-cell	EIF2AK2	EIF2AK2
NPIPB3	1.30992e-08	-0.568181	0.242	0.392	0.000312784	Spinous-cell	NPIPB3	NPIPB3
A1BG	1.3107e-08	-0.912203	0.113	0.23	0.000312969	Spinous-cell	A1BG	A1BG
LOC101930452	1.33462e-08	-2.02827	0.089	0.201	0.00031868	Spinous-cell	LOC101930452	LOC101930452
TOE1	1.33891e-08	-1.20494	0.202	0.34	0.000319705	Spinous-cell	TOE1	TOE1
DEGS2	1.37862e-08	2.5544	0.238	0.116	0.000329187	Spinous-cell	DEGS2	DEGS2
CD59	1.38571e-08	-1.66244	0.974	0.983	0.000330881	Spinous-cell	CD59	CD59
ENOPH1	1.38931e-08	-0.52681	0.54	0.681	0.000331739	Spinous-cell	ENOPH1	ENOPH1
ALOX15B	1.39441e-08	-1.50505	0.161	0.292	0.000332958	Spinous-cell	ALOX15B	ALOX15B
CCDC74A	1.40062e-08	-0.684973	0.092	0.212	0.00033444	Spinous-cell	CCDC74A	CCDC74A
GYG2	1.40123e-08	-2.60654	0.021	0.097	0.000334586	Spinous-cell	GYG2	GYG2
CCNJL	1.40422e-08	-3.74434	0.041	0.131	0.0003353	Spinous-cell	CCNJL	CCNJL
IFIT3	1.41034e-08	-1.64562	0.186	0.32	0.000336761	Spinous-cell	IFIT3	IFIT3
HIST1H2AH	1.41064e-08	-1.67029	0.123	0.245	0.000336833	Spinous-cell	HIST1H2AH	HIST1H2AH
KIF20A	1.43052e-08	-2.41756	0.084	0.193	0.00034158	Spinous-cell	KIF20A	KIF20A
HAGHL	1.43244e-08	-3.5345	0.038	0.125	0.000342038	Spinous-cell	HAGHL	HAGHL
C3orf70	1.45086e-08	-2.03669	0.072	0.176	0.000346437	Spinous-cell	C3orf70	C3orf70
LGALS7	1.46627e-08	1.09412	0.755	0.736	0.000350117	Spinous-cell	LGALS7	LGALS7
GALNTL6	1.48198e-08	-8.82209	0.009	0.071	0.000353868	Spinous-cell	GALNTL6	GALNTL6
SORBS1	1.52888e-08	-1.05943	0.084	0.195	0.000365066	Spinous-cell	SORBS1	SORBS1
BST1	1.58131e-08	-1.72673	0.038	0.125	0.000377585	Spinous-cell	BST1	BST1
CHCHD6	1.60686e-08	-1.04553	0.429	0.564	0.000383687	Spinous-cell	CHCHD6	CHCHD6
CTSF	1.65197e-08	-1.23842	0.442	0.568	0.000394458	Spinous-cell	CTSF	CTSF
SLC16A14	1.70429e-08	1.51713	0.382	0.228	0.000406951	Spinous-cell	SLC16A14	SLC16A14
TPCN2	1.70711e-08	-2.04678	0.305	0.458	0.000407623	Spinous-cell	TPCN2	TPCN2
FAM111B	1.71401e-08	-2.69992	0.077	0.18	0.000409272	Spinous-cell	FAM111B	FAM111B
NCAPD2	1.71853e-08	-1.16277	0.322	0.465	0.00041035	Spinous-cell	NCAPD2	NCAPD2
SLC26A6	1.74358e-08	-0.574257	0.253	0.409	0.000416333	Spinous-cell	SLC26A6	SLC26A6
SGOL2	1.76579e-08	-1.99279	0.077	0.183	0.000421635	Spinous-cell	SGOL2	SGOL2
CENPM	1.78567e-08	-1.24252	0.123	0.243	0.000426383	Spinous-cell	CENPM	CENPM
CMTM7	1.79746e-08	-1.41155	0.087	0.197	0.000429197	Spinous-cell	CMTM7	CMTM7
TADA3	1.86916e-08	-0.635866	0.574	0.691	0.000446319	Spinous-cell	TADA3	TADA3
ASB11	1.87028e-08	-7.14964	0.008	0.068	0.000446585	Spinous-cell	ASB11	ASB11
GCSH	1.87476e-08	-0.706993	0.268	0.419	0.000447655	Spinous-cell	GCSH	GCSH
TTYH3	1.87919e-08	-3.19669	0.363	0.494	0.000448712	Spinous-cell	TTYH3	TTYH3
CKS2	1.8849e-08	-1.10559	0.38	0.515	0.000450076	Spinous-cell	CKS2	CKS2
CENPA	1.88995e-08	-1.77776	0.063	0.164	0.000451283	Spinous-cell	CENPA	CENPA
CYR61	1.89807e-08	0.918633	0.354	0.508	0.00045322	Spinous-cell	CYR61	CYR61
RAB30	1.90295e-08	-0.736817	0.273	0.423	0.000454387	Spinous-cell	RAB30	RAB30
MID1IP1	1.90755e-08	-0.506759	0.373	0.537	0.000455485	Spinous-cell	MID1IP1	MID1IP1
LNP1	1.92703e-08	-5.23876	0.017	0.087	0.000460137	Spinous-cell	LNP1	LNP1
SLFN13	1.96726e-08	-2.79114	0.044	0.135	0.000469743	Spinous-cell	SLFN13	SLFN13
ZNF534	1.97351e-08	-0.525588	0.471	0.627	0.000471235	Spinous-cell	ZNF534	ZNF534
ZNF185	2.0122e-08	1.19884	0.701	0.612	0.000480473	Spinous-cell	ZNF185	ZNF185
PHACTR1	2.01954e-08	-3.83786	0.031	0.112	0.000482225	Spinous-cell	PHACTR1	PHACTR1
PERM1	2.02971e-08	2.11844	0.402	0.261	0.000484655	Spinous-cell	PERM1	PERM1
ILK	2.04995e-08	-0.516542	0.678	0.801	0.000489488	Spinous-cell	ILK	ILK
THEM5	2.0959e-08	2.49993	0.446	0.334	0.000500459	Spinous-cell	THEM5	THEM5
LOC642846	2.11552e-08	-0.735182	0.213	0.357	0.000505144	Spinous-cell	LOC642846	LOC642846
PCNA	2.11723e-08	-0.919375	0.664	0.77	0.000505553	Spinous-cell	PCNA	PCNA
ZNF367	2.17319e-08	-1.85179	0.072	0.176	0.000518915	Spinous-cell	ZNF367	ZNF367
PTEN	2.18745e-08	-0.512437	0.821	0.921	0.00052232	Spinous-cell	PTEN	PTEN
POLQ	2.18897e-08	-1.52962	0.06	0.158	0.000522682	Spinous-cell	POLQ	POLQ
ST3GAL5	2.19038e-08	-1.13657	0.118	0.241	0.000523019	Spinous-cell	ST3GAL5	ST3GAL5
MAP7D3	2.21736e-08	-1.08682	0.195	0.334	0.000529462	Spinous-cell	MAP7D3	MAP7D3
HES2	2.23985e-08	1.36034	0.624	0.504	0.000534831	Spinous-cell	HES2	HES2
ANKRD35	2.27529e-08	2.49093	0.417	0.292	0.000543295	Spinous-cell	ANKRD35	ANKRD35
AURKA	2.29802e-08	-2.66221	0.087	0.193	0.000548721	Spinous-cell	AURKA	AURKA
GPSM3.7	2.30829e-08	-1.59045	0.11	0.224	0.000551172	Spinous-cell	GPSM3.7	GPSM3
CBLB	2.31214e-08	-1.10639	0.138	0.261	0.000552094	Spinous-cell	CBLB	CBLB
COL4A1	2.3132e-08	-3.29069	0.051	0.143	0.000552346	Spinous-cell	COL4A1	COL4A1
PTTG3P	2.33386e-08	-1.5307	0.37	0.5	0.000557279	Spinous-cell	PTTG3P	PTTG3P
YEATS4	2.35718e-08	-0.537038	0.416	0.558	0.000562848	Spinous-cell	YEATS4	YEATS4
ARL14EP	2.36658e-08	-0.690096	0.365	0.504	0.000565093	Spinous-cell	ARL14EP	ARL14EP
HDGFRP3	2.37443e-08	-0.744769	0.181	0.317	0.000566966	Spinous-cell	HDGFRP3	HDGFRP3
WNT3A	2.40946e-08	-0.901888	0.083	0.193	0.00057533	Spinous-cell	WNT3A	WNT3A
NEK6	2.4218e-08	-1.92313	0.137	0.259	0.000578276	Spinous-cell	NEK6	NEK6
POLD1	2.50968e-08	-0.686854	0.353	0.494	0.000599261	Spinous-cell	POLD1	POLD1
MAGOH	2.51252e-08	-0.509673	0.521	0.685	0.000599939	Spinous-cell	MAGOH	MAGOH
LPCAT1.2	2.51908e-08	-0.712279	0.302	0.452	0.000601507	Spinous-cell	LPCAT1.2	LPCAT1
CTSV	2.52475e-08	0.829012	0.239	0.384	0.000602861	Spinous-cell	CTSV	CTSV
TUBA4A	2.59638e-08	0.681778	0.928	0.932	0.000619963	Spinous-cell	TUBA4A	TUBA4A
PLCD4	2.64985e-08	-1.14027	0.097	0.208	0.000632731	Spinous-cell	PLCD4	PLCD4
PKNOX2	2.76514e-08	-4.09816	0.035	0.118	0.000660259	Spinous-cell	PKNOX2	PKNOX2
STK17B	2.80456e-08	-0.833221	0.436	0.566	0.000669673	Spinous-cell	STK17B	STK17B
LEF1-AS1	2.82226e-08	-4.3037	0.011	0.073	0.000673898	Spinous-cell	LEF1-AS1	LEF1-AS1
PECR	2.83445e-08	-1.06551	0.098	0.212	0.00067681	Spinous-cell	PECR	PECR
MTMR2	3.07578e-08	-0.658951	0.393	0.533	0.000734434	Spinous-cell	MTMR2	MTMR2
RNF144A	3.17861e-08	-1.99797	0.161	0.286	0.000758989	Spinous-cell	RNF144A	RNF144A
PLOD1	3.20643e-08	-0.69205	0.449	0.571	0.000765632	Spinous-cell	PLOD1	PLOD1
LOC101927189	3.3326e-08	1.3548	0.411	0.278	0.000795758	Spinous-cell	LOC101927189	LOC101927189
CXADR	3.34769e-08	0.568577	0.983	0.942	0.00079936	Spinous-cell	CXADR	CXADR
GALE	3.4778e-08	-0.986662	0.31	0.44	0.00083043	Spinous-cell	GALE	GALE
RNF216	3.58199e-08	-0.616933	0.475	0.616	0.000855308	Spinous-cell	RNF216	RNF216
TNFRSF14.1	3.60754e-08	-1.51236	0.48	0.593	0.000861407	Spinous-cell	TNFRSF14.1	TNFRSF14
FHOD3	3.7046e-08	-1.09976	0.118	0.239	0.000884585	Spinous-cell	FHOD3	FHOD3
CRYL1	3.73566e-08	-0.881879	0.305	0.44	0.000892001	Spinous-cell	CRYL1	CRYL1
IRS1	3.78473e-08	-1.09451	0.19	0.317	0.000903718	Spinous-cell	IRS1	IRS1
STX2	3.83594e-08	-0.529168	0.086	0.195	0.000915946	Spinous-cell	STX2	STX2
GPR155	3.87006e-08	-2.12249	0.583	0.689	0.000924092	Spinous-cell	GPR155	GPR155
LAMA4	3.8714e-08	-2.43354	0.066	0.166	0.000924412	Spinous-cell	LAMA4	LAMA4
SLC40A1	3.93356e-08	-0.580937	0.158	0.29	0.000939256	Spinous-cell	SLC40A1	SLC40A1
JAM3	3.99006e-08	-0.811575	0.133	0.249	0.000952746	Spinous-cell	JAM3	JAM3
TNFRSF21	4.04046e-08	-2.10425	0.238	0.361	0.000964781	Spinous-cell	TNFRSF21	TNFRSF21
LGR6	4.11364e-08	-0.59054	0.11	0.228	0.000982255	Spinous-cell	LGR6	LGR6
STAM	4.11845e-08	-0.995389	0.359	0.494	0.000983402	Spinous-cell	STAM	STAM
FMNL3	4.18641e-08	-1.7173	0.253	0.392	0.000999631	Spinous-cell	FMNL3	FMNL3
NOL4L	4.18842e-08	-4.31433	0.109	0.216	0.00100011	Spinous-cell	NOL4L	NOL4L
SYT8	4.19563e-08	-1.17328	0.567	0.68	0.00100183	Spinous-cell	SYT8	SYT8
CGRRF1	4.21299e-08	-1.80266	0.104	0.214	0.00100598	Spinous-cell	CGRRF1	CGRRF1
CNTLN	4.22544e-08	-0.753079	0.164	0.297	0.00100895	Spinous-cell	CNTLN	CNTLN
TGFBI	4.24148e-08	-0.658778	0.839	0.907	0.00101278	Spinous-cell	TGFBI	TGFBI
PKP3	4.2518e-08	0.61412	0.975	0.95	0.00101525	Spinous-cell	PKP3	PKP3
FSCN1	4.48541e-08	-0.613884	0.709	0.83	0.00107103	Spinous-cell	FSCN1	FSCN1
LYST	4.4895e-08	-1.09554	0.586	0.703	0.001072	Spinous-cell	LYST	LYST
KCNS3	4.49175e-08	-0.910545	0.149	0.276	0.00107254	Spinous-cell	KCNS3	KCNS3
CRABP2	4.58003e-08	1.41969	0.669	0.583	0.00109362	Spinous-cell	CRABP2	CRABP2
STK32A	4.65742e-08	-3.65259	0.035	0.116	0.0011121	Spinous-cell	STK32A	STK32A
CADM3	4.67518e-08	-4.21724	0.018	0.087	0.00111634	Spinous-cell	CADM3	CADM3
SLC2A6	4.74503e-08	-5.47558	0.021	0.093	0.00113302	Spinous-cell	SLC2A6	SLC2A6
PLK1	4.76371e-08	-2.44146	0.113	0.226	0.00113748	Spinous-cell	PLK1	PLK1
NBAT1	4.78388e-08	-5.19072	0.015	0.081	0.00114229	Spinous-cell	NBAT1	NBAT1
AADACL2.1	4.79995e-08	1.95673	0.259	0.141	0.00114613	Spinous-cell	AADACL2.1	AADACL2
MSC	4.84186e-08	-2.32483	0.061	0.154	0.00115614	Spinous-cell	MSC	MSC
SFR1	4.86707e-08	-0.560141	0.204	0.346	0.00116216	Spinous-cell	SFR1	SFR1
MTMR9LP	4.86866e-08	-1.26134	0.02	0.091	0.00116254	Spinous-cell	MTMR9LP	MTMR9LP
PIK3CD-AS2	5.09876e-08	-3.99028	0.018	0.087	0.00121748	Spinous-cell	PIK3CD-AS2	PIK3CD-AS2
ARHGAP11A.1	5.17046e-08	-2.19264	0.123	0.236	0.0012346	Spinous-cell	ARHGAP11A.1	ARHGAP11A
ARMCX1	5.20297e-08	-1.0225	0.271	0.405	0.00124236	Spinous-cell	ARMCX1	ARMCX1
LINC01314	5.26182e-08	-3.90161	0.018	0.087	0.00125642	Spinous-cell	LINC01314	LINC01314
CLDN8	5.2762e-08	2.56033	0.179	0.073	0.00125985	Spinous-cell	CLDN8	CLDN8
VOPP1	5.34847e-08	-1.10798	0.186	0.324	0.00127711	Spinous-cell	VOPP1	VOPP1
HACD1	5.35383e-08	-1.63463	0.215	0.344	0.00127839	Spinous-cell	HACD1	HACD1
NUP160	5.43051e-08	-0.622578	0.465	0.581	0.0012967	Spinous-cell	NUP160	NUP160
IFT52	5.51457e-08	-0.648446	0.34	0.477	0.00131677	Spinous-cell	IFT52	IFT52
FAM101B	5.59143e-08	-2.6497	0.074	0.174	0.00133512	Spinous-cell	FAM101B	FAM101B
TMEM204	5.60383e-08	-3.71787	0.054	0.143	0.00133808	Spinous-cell	TMEM204	TMEM204
ILVBL	5.72601e-08	-1.21007	0.661	0.763	0.00136726	Spinous-cell	ILVBL	ILVBL
TANGO2	5.90986e-08	-1.08185	0.334	0.469	0.00141116	Spinous-cell	TANGO2	TANGO2
BMPR1B	5.9231e-08	-1.99397	0.233	0.361	0.00141432	Spinous-cell	BMPR1B	BMPR1B
TMEM263	5.94355e-08	-0.655175	0.227	0.367	0.0014192	Spinous-cell	TMEM263	TMEM263
COPS8	6.12834e-08	-0.82362	0.644	0.755	0.00146332	Spinous-cell	COPS8	COPS8
LURAP1	6.3577e-08	-1.48597	0.028	0.104	0.00151809	Spinous-cell	LURAP1	LURAP1
ALCAM	6.55082e-08	-1.33064	0.173	0.307	0.00156421	Spinous-cell	ALCAM	ALCAM
TGFBR1	6.72495e-08	-0.766273	0.345	0.477	0.00160578	Spinous-cell	TGFBR1	TGFBR1
TMEM140	6.83064e-08	-2.11275	0.112	0.22	0.00163102	Spinous-cell	TMEM140	TMEM140
SLC2A3	6.93409e-08	-1.08606	0.057	0.149	0.00165572	Spinous-cell	SLC2A3	SLC2A3
MIR4649	7.043e-08	-8.2721	0.002	0.048	0.00168173	Spinous-cell	MIR4649	MIR4649
HABP4	7.12832e-08	-1.92963	0.08	0.181	0.0017021	Spinous-cell	HABP4	HABP4
KRT76	7.13869e-08	1.38036	0.261	0.137	0.00170458	Spinous-cell	KRT76	KRT76
LINC01554	7.20595e-08	-3.56617	0.017	0.083	0.00172064	Spinous-cell	LINC01554	LINC01554
TMPO	7.2212e-08	-0.637781	0.42	0.56	0.00172428	Spinous-cell	TMPO	TMPO
RAMP2	7.35308e-08	-2.85922	0.02	0.089	0.00175577	Spinous-cell	RAMP2	RAMP2
CD99.1	7.52506e-08	-0.960603	0.12	0.239	0.00179683	Spinous-cell	CD99.1	CD99
IRS2	7.59515e-08	-1.94433	0.339	0.475	0.00181357	Spinous-cell	IRS2	IRS2
LINC00839	7.6212e-08	-5.14754	0.006	0.06	0.00181979	Spinous-cell	LINC00839	LINC00839
S100A3	7.7087e-08	-1.87048	0.187	0.315	0.00184068	Spinous-cell	S100A3	S100A3
MKRN2	7.72946e-08	-0.657388	0.429	0.569	0.00184564	Spinous-cell	MKRN2	MKRN2
SLC19A1	7.77876e-08	-0.842378	0.067	0.166	0.00185741	Spinous-cell	SLC19A1	SLC19A1
LINC01158	7.84773e-08	-10.2682	0.003	0.052	0.00187388	Spinous-cell	LINC01158	LINC01158
FANCC	7.89038e-08	-0.50606	0.213	0.347	0.00188406	Spinous-cell	FANCC	FANCC
ABLIM1	7.89583e-08	0.65815	0.873	0.844	0.00188537	Spinous-cell	ABLIM1	ABLIM1
ARMCX3	8.19391e-08	-0.842269	0.229	0.363	0.00195654	Spinous-cell	ARMCX3	ARMCX3
POFUT2	8.3707e-08	-0.866388	0.179	0.313	0.00199876	Spinous-cell	POFUT2	POFUT2
SLC12A7.2	8.52928e-08	-0.538531	0.166	0.292	0.00203662	Spinous-cell	SLC12A7.2	SLC12A7
BAIAP2L2	8.60579e-08	-1.64635	0.103	0.212	0.00205489	Spinous-cell	BAIAP2L2	BAIAP2L2
EIF5A2	8.72796e-08	-1.29794	0.153	0.274	0.00208406	Spinous-cell	EIF5A2	EIF5A2
LPIN1	8.75295e-08	-0.548958	0.212	0.347	0.00209003	Spinous-cell	LPIN1	LPIN1
EMB	8.81667e-08	-0.971706	0.25	0.38	0.00210524	Spinous-cell	EMB	EMB
DTYMK	8.82096e-08	-0.723099	0.468	0.595	0.00210627	Spinous-cell	DTYMK	DTYMK
TMEM175	8.82237e-08	-0.618201	0.471	0.625	0.0021066	Spinous-cell	TMEM175	TMEM175
TMEM220-AS1	8.93229e-08	-1.63159	0.072	0.17	0.00213285	Spinous-cell	TMEM220-AS1	TMEM220-AS1
CDC14A	9.05062e-08	1.01392	0.087	0.199	0.00216111	Spinous-cell	CDC14A	CDC14A
FHL2	9.07843e-08	-0.530233	0.56	0.689	0.00216775	Spinous-cell	FHL2	FHL2
BSPRY	9.09624e-08	2.69593	0.193	0.085	0.002172	Spinous-cell	BSPRY	BSPRY
PLBD2	9.33492e-08	-1.85099	0.279	0.409	0.00222899	Spinous-cell	PLBD2	PLBD2
FAM69C	9.80439e-08	-3.01138	0.031	0.106	0.00234109	Spinous-cell	FAM69C	FAM69C
CTBP2	9.92536e-08	-0.665273	0.423	0.568	0.00236998	Spinous-cell	CTBP2	CTBP2
ACSL1	9.94168e-08	1.31555	0.753	0.695	0.00237387	Spinous-cell	ACSL1	ACSL1
NRXN3	1.02564e-07	-2.41765	0.063	0.154	0.00244901	Spinous-cell	NRXN3	NRXN3
C17orf51	1.03927e-07	-1.83652	0.046	0.131	0.00248157	Spinous-cell	C17orf51	C17orf51
NFATC4	1.07373e-07	-2.1794	0.021	0.091	0.00256385	Spinous-cell	NFATC4	NFATC4
C16orf95	1.08101e-07	-0.529878	0.074	0.176	0.00258124	Spinous-cell	C16orf95	C16orf95
PRKACB	1.08781e-07	-0.77481	0.195	0.319	0.00259747	Spinous-cell	PRKACB	PRKACB
ST8SIA1	1.15727e-07	-0.981634	0.117	0.23	0.00276332	Spinous-cell	ST8SIA1	ST8SIA1
NRARP	1.16872e-07	0.862938	0.512	0.378	0.00279066	Spinous-cell	NRARP	NRARP
E2F8	1.17973e-07	-2.05294	0.083	0.183	0.00281696	Spinous-cell	E2F8	E2F8
MIR3620	1.19832e-07	-0.509931	0.526	0.683	0.00286135	Spinous-cell	MIR3620	MIR3620
PLA2G7	1.22419e-07	-0.961485	0.026	0.098	0.00292312	Spinous-cell	PLA2G7	PLA2G7
BRCA1	1.23038e-07	-0.902583	0.164	0.282	0.00293791	Spinous-cell	BRCA1	BRCA1
FUT8	1.23165e-07	-0.638125	0.181	0.315	0.00294095	Spinous-cell	FUT8	FUT8
KIF18A	1.23262e-07	-1.86567	0.034	0.112	0.00294326	Spinous-cell	KIF18A	KIF18A
ACD	1.25483e-07	-0.771312	0.339	0.471	0.00299629	Spinous-cell	ACD	ACD
PNMA1	1.26929e-07	-1.34467	0.236	0.363	0.00303081	Spinous-cell	PNMA1	PNMA1
CNRIP1	1.29525e-07	-3.59295	0.025	0.095	0.0030928	Spinous-cell	CNRIP1	CNRIP1
BLM	1.31628e-07	-1.37429	0.043	0.125	0.00314301	Spinous-cell	BLM	BLM
MTHFD1	1.39725e-07	-0.815582	0.503	0.616	0.00333635	Spinous-cell	MTHFD1	MTHFD1
NMT1	1.40968e-07	-0.632933	0.653	0.786	0.00336604	Spinous-cell	NMT1	NMT1
ZBTB10	1.41418e-07	-1.15578	0.058	0.151	0.00337678	Spinous-cell	ZBTB10	ZBTB10
OSBPL9	1.44693e-07	-1.26241	0.544	0.681	0.00345499	Spinous-cell	OSBPL9	OSBPL9
TCEAL1	1.49423e-07	-0.622857	0.428	0.562	0.00356793	Spinous-cell	TCEAL1	TCEAL1
EVA1A	1.51443e-07	-2.46314	0.066	0.16	0.00361615	Spinous-cell	EVA1A	EVA1A
CASC5	1.5694e-07	-1.88204	0.048	0.131	0.00374742	Spinous-cell	CASC5	CASC5
AHRR	1.57155e-07	-4.18684	0.025	0.095	0.00375255	Spinous-cell	AHRR	AHRR
SGPP2	1.59687e-07	1.64948	0.308	0.178	0.00381301	Spinous-cell	SGPP2	SGPP2
ATAD2	1.67883e-07	-0.693429	0.262	0.394	0.00400872	Spinous-cell	ATAD2	ATAD2
SMARCAD1	1.71026e-07	-0.633954	0.472	0.602	0.00408375	Spinous-cell	SMARCAD1	SMARCAD1
IVD	1.72956e-07	-1.40409	0.098	0.201	0.00412985	Spinous-cell	IVD	IVD
CERCAM	1.7332e-07	-1.49257	0.109	0.214	0.00413854	Spinous-cell	CERCAM	CERCAM
VLDLR	1.85056e-07	-2.37076	0.161	0.28	0.00441877	Spinous-cell	VLDLR	VLDLR
APOLD1	1.90816e-07	0.544791	0.087	0.191	0.00455631	Spinous-cell	APOLD1	APOLD1
CCDC110	1.93487e-07	-1.16226	0.012	0.071	0.00462008	Spinous-cell	CCDC110	CCDC110
CCL2	1.94927e-07	-2.31132	0.336	0.442	0.00465446	Spinous-cell	CCL2	CCL2
CA2	1.9964e-07	0.585758	0.847	0.776	0.00476701	Spinous-cell	CA2	CA2
EPS15	2.04386e-07	-1.06675	0.597	0.703	0.00488033	Spinous-cell	EPS15	EPS15
E2F7	2.05302e-07	-1.83125	0.083	0.181	0.00490219	Spinous-cell	E2F7	E2F7
TNFRSF6B	2.06133e-07	-2.43349	0.083	0.178	0.00492204	Spinous-cell	TNFRSF6B	TNFRSF6B
MFSD12	2.09314e-07	-3.9363	0.422	0.525	0.004998	Spinous-cell	MFSD12	MFSD12
EPHA5	2.15439e-07	-7.22694	0.014	0.073	0.00514426	Spinous-cell	EPHA5	EPHA5
MTFR2	2.229e-07	-1.47641	0.078	0.176	0.00532242	Spinous-cell	MTFR2	MTFR2
LOC100130691	2.28565e-07	0.770894	0.299	0.17	0.00545767	Spinous-cell	LOC100130691	LOC100130691
WDFY1	2.29894e-07	-0.534026	0.457	0.589	0.0054894	Spinous-cell	WDFY1	WDFY1
OIP5	2.34924e-07	-1.06282	0.124	0.236	0.00560951	Spinous-cell	OIP5	OIP5
GPC4	2.36589e-07	-1.74055	0.054	0.141	0.00564927	Spinous-cell	GPC4	GPC4
BEND5	2.37799e-07	-2.47104	0.014	0.073	0.00567817	Spinous-cell	BEND5	BEND5
RASSF8	2.3861e-07	-1.36058	0.057	0.145	0.00569752	Spinous-cell	RASSF8	RASSF8
CYTH3	2.41509e-07	-2.08089	0.31	0.423	0.00576674	Spinous-cell	CYTH3	CYTH3
NSL1	2.42026e-07	0.511589	0.348	0.5	0.0057791	Spinous-cell	NSL1	NSL1
FAM64A	2.49147e-07	-1.80905	0.052	0.137	0.00594912	Spinous-cell	FAM64A	FAM64A
PQLC2L	2.57846e-07	-4.46377	0.037	0.112	0.00615685	Spinous-cell	PQLC2L	PQLC2L
ZWILCH	2.58147e-07	-0.540352	0.262	0.386	0.00616404	Spinous-cell	ZWILCH	ZWILCH
CRTAC1	2.60219e-07	-2.20847	0.043	0.124	0.0062135	Spinous-cell	CRTAC1	CRTAC1
NPAT	2.60558e-07	-1.02485	0.235	0.359	0.0062216	Spinous-cell	NPAT	NPAT
EMR2	2.65766e-07	-2.90084	0.086	0.18	0.00634596	Spinous-cell	EMR2	EMR2
RAB11A	2.69065e-07	0.562801	0.942	0.958	0.00642473	Spinous-cell	RAB11A	RAB11A
IL34	2.71136e-07	1.20823	0.426	0.303	0.00647417	Spinous-cell	IL34	IL34
EXOSC9	2.71422e-07	-0.539485	0.383	0.515	0.006481	Spinous-cell	EXOSC9	EXOSC9
AAAS	2.7146e-07	-0.54472	0.521	0.629	0.00648192	Spinous-cell	AAAS	AAAS
ST3GAL6	2.73251e-07	-1.33459	0.321	0.448	0.00652468	Spinous-cell	ST3GAL6	ST3GAL6
NR2C2AP	2.73309e-07	-0.556793	0.497	0.627	0.00652608	Spinous-cell	NR2C2AP	NR2C2AP
ST3GAL6-AS1	2.7623e-07	-1.15224	0.034	0.108	0.00659582	Spinous-cell	ST3GAL6-AS1	ST3GAL6-AS1
PDK3	2.79294e-07	-0.628066	0.42	0.548	0.00666897	Spinous-cell	PDK3	PDK3
TUBB2B	2.80786e-07	-2.35099	0.035	0.11	0.00670462	Spinous-cell	TUBB2B	TUBB2B
EFCAB1	2.81919e-07	-0.690447	0.086	0.187	0.00673166	Spinous-cell	EFCAB1	EFCAB1
PDP1	2.82181e-07	-0.549949	0.301	0.438	0.00673792	Spinous-cell	PDP1	PDP1
TMEM220	2.82666e-07	-0.88643	0.271	0.403	0.00674951	Spinous-cell	TMEM220	TMEM220
CENPO	2.83305e-07	-0.890626	0.186	0.305	0.00676475	Spinous-cell	CENPO	CENPO
C1QTNF2	2.83622e-07	-1.66257	0.017	0.079	0.00677233	Spinous-cell	C1QTNF2	C1QTNF2
SMG9	2.85719e-07	-0.960989	0.253	0.384	0.00682241	Spinous-cell	SMG9	SMG9
C8orf48	2.97395e-07	-2.14257	0.008	0.06	0.0071012	Spinous-cell	C8orf48	C8orf48
NAGLU	2.97415e-07	-1.40262	0.209	0.334	0.00710166	Spinous-cell	NAGLU	NAGLU
SPPL2A	2.9766e-07	-0.608602	0.452	0.597	0.00710753	Spinous-cell	SPPL2A	SPPL2A
RETSAT	2.98476e-07	-1.31251	0.552	0.674	0.007127	Spinous-cell	RETSAT	RETSAT
THOP1	3.01961e-07	-0.811237	0.348	0.473	0.00721023	Spinous-cell	THOP1	THOP1
MOSPD1	3.01971e-07	-0.515199	0.276	0.4	0.00721046	Spinous-cell	MOSPD1	MOSPD1
NAT8L	3.09278e-07	-5.10417	0.026	0.095	0.00738494	Spinous-cell	NAT8L	NAT8L
MRE11A	3.11323e-07	1.34152	0.285	0.409	0.00743377	Spinous-cell	MRE11A	MRE11A
NFATC2	3.11518e-07	-3.02758	0.021	0.087	0.00743843	Spinous-cell	NFATC2	NFATC2
MIA	3.13695e-07	-2.05931	0.046	0.127	0.0074904	Spinous-cell	MIA	MIA
FCRLA	3.2036e-07	-3.21679	0.049	0.129	0.00764955	Spinous-cell	FCRLA	FCRLA
GTSE1	3.22614e-07	-2.0833	0.055	0.141	0.00770337	Spinous-cell	GTSE1	GTSE1
UBXN11	3.25629e-07	-0.598199	0.331	0.461	0.00777536	Spinous-cell	UBXN11	UBXN11
CORO6	3.27615e-07	-0.847947	0.161	0.278	0.00782278	Spinous-cell	CORO6	CORO6
STIL	3.32319e-07	-1.27775	0.084	0.181	0.0079351	Spinous-cell	STIL	STIL
CXCL14	3.3372e-07	-0.700199	1	1	0.00796856	Spinous-cell	CXCL14	CXCL14
CKAP5	3.39182e-07	-0.77561	0.448	0.575	0.00809899	Spinous-cell	CKAP5	CKAP5
LOC101928323	3.42588e-07	-2.33801	0.003	0.048	0.00818031	Spinous-cell	LOC101928323	LOC101928323
L1CAM	3.48335e-07	-4.23536	0.066	0.153	0.00831755	Spinous-cell	L1CAM	L1CAM
GPR125	3.51442e-07	-1.04969	0.15	0.266	0.00839174	Spinous-cell	GPR125	GPR125
PTK6	3.55701e-07	1.23952	0.624	0.546	0.00849343	Spinous-cell	PTK6	PTK6
NUCB1-AS1	3.73388e-07	0.536029	0.302	0.44	0.00891575	Spinous-cell	NUCB1-AS1	NUCB1-AS1
PTTG2	3.78247e-07	2.72322	0.173	0.293	0.00903178	Spinous-cell	PTTG2	PTTG2
KPNA2	3.80228e-07	-1.91276	0.448	0.585	0.00907907	Spinous-cell	KPNA2	KPNA2
C20orf96	3.84598e-07	-0.619945	0.067	0.16	0.00918342	Spinous-cell	C20orf96	C20orf96
PLA2G15	3.88723e-07	-0.675899	0.265	0.394	0.00928193	Spinous-cell	PLA2G15	PLA2G15
EPB41L3	3.90833e-07	-0.669727	0.172	0.288	0.0093323	Spinous-cell	EPB41L3	EPB41L3
TONSL	3.97971e-07	-0.538804	0.129	0.243	0.00950276	Spinous-cell	TONSL	TONSL
BMP4	3.99426e-07	-0.785131	0.155	0.276	0.0095375	Spinous-cell	BMP4	BMP4
KITLG	4.03129e-07	-0.500194	0.298	0.44	0.00962591	Spinous-cell	KITLG	KITLG
RAD51AP1	4.05846e-07	-2.12809	0.11	0.21	0.00969079	Spinous-cell	RAD51AP1	RAD51AP1
TIMP2	4.08789e-07	-3.51878	0.196	0.303	0.00976105	Spinous-cell	TIMP2	TIMP2
CHPT1	4.15918e-07	-0.506915	0.238	0.375	0.00993129	Spinous-cell	CHPT1	CHPT1
MAPRE2	4.18291e-07	-0.650684	0.342	0.485	0.00998796	Spinous-cell	MAPRE2	MAPRE2
SYT11	4.31471e-07	-4.23598	0.035	0.108	0.0103027	Spinous-cell	SYT11	SYT11
FOXM1	4.33482e-07	-1.5709	0.17	0.284	0.0103507	Spinous-cell	FOXM1	FOXM1
FSTL4	4.38416e-07	-2.19301	0.09	0.185	0.0104685	Spinous-cell	FSTL4	FSTL4
NEAT1	4.40319e-07	1.07292	0.934	0.942	0.0105139	Spinous-cell	NEAT1	NEAT1
C15orf39	4.44145e-07	-0.689794	0.317	0.452	0.0106053	Spinous-cell	C15orf39	C15orf39
EXOSC2	4.75812e-07	0.935304	0.356	0.486	0.0113614	Spinous-cell	EXOSC2	EXOSC2
P2RX4	4.83148e-07	-1.35615	0.196	0.315	0.0115366	Spinous-cell	P2RX4	P2RX4
HAUS2	4.87587e-07	-0.627741	0.299	0.448	0.0116426	Spinous-cell	HAUS2	HAUS2
FAM83B	4.89062e-07	0.832513	0.768	0.683	0.0116778	Spinous-cell	FAM83B	FAM83B
DNMT1	4.92633e-07	-0.648633	0.54	0.629	0.0117631	Spinous-cell	DNMT1	DNMT1
KCNN2	5.12962e-07	-2.90377	0.015	0.073	0.0122485	Spinous-cell	KCNN2	KCNN2
TSTD2	5.30259e-07	-1.25993	0.146	0.259	0.0126615	Spinous-cell	TSTD2	TSTD2
CDCA7	5.37561e-07	-0.610306	0.417	0.539	0.0128359	Spinous-cell	CDCA7	CDCA7
TMEM45B	5.45275e-07	2.20212	0.31	0.195	0.0130201	Spinous-cell	TMEM45B	TMEM45B
C16orf45.1	5.50194e-07	-2.18004	0.055	0.139	0.0131375	Spinous-cell	C16orf45.1	C16orf45
HOXD8	5.52261e-07	-1.32606	0.023	0.089	0.0131869	Spinous-cell	HOXD8	HOXD8
HLA-DPA1.8	5.68583e-07	-3.35348	0.279	0.392	0.0135766	Spinous-cell	HLA-DPA1.8	HLA-DPA1
STXBP1	5.70692e-07	-0.72867	0.353	0.494	0.013627	Spinous-cell	STXBP1	STXBP1
CCNF	5.86241e-07	-1.16726	0.138	0.249	0.0139983	Spinous-cell	CCNF	CCNF
FAIM3	6.0056e-07	-1.75141	0.137	0.243	0.0143402	Spinous-cell	FAIM3	FAIM3
SLITRK2	6.21107e-07	-3.6319	0.089	0.181	0.0148308	Spinous-cell	SLITRK2	SLITRK2
SFXN3	6.25254e-07	-0.845039	0.417	0.533	0.0149298	Spinous-cell	SFXN3	SFXN3
ASAP2	6.30715e-07	-0.694821	0.359	0.498	0.0150602	Spinous-cell	ASAP2	ASAP2
ZNF718	6.33684e-07	-0.535606	0.175	0.297	0.0151311	Spinous-cell	ZNF718	ZNF718
HPS3	6.36274e-07	-1.26463	0.195	0.307	0.015193	Spinous-cell	HPS3	HPS3
NAGA	6.4938e-07	-0.675492	0.331	0.461	0.0155059	Spinous-cell	NAGA	NAGA
FAR2	6.68254e-07	-3.40549	0.054	0.135	0.0159566	Spinous-cell	FAR2	FAR2
ACTG1P4	6.72115e-07	-0.662395	0.595	0.747	0.0160488	Spinous-cell	ACTG1P4	ACTG1P4
TNC	6.74381e-07	-1.36661	0.383	0.49	0.0161029	Spinous-cell	TNC	TNC
MT1L	6.79358e-07	-2.42076	0.216	0.338	0.0162217	Spinous-cell	MT1L	MT1L
B4GALT6	6.7952e-07	-1.71133	0.064	0.153	0.0162256	Spinous-cell	B4GALT6	B4GALT6
MAGEH1	6.96303e-07	-0.865832	0.198	0.317	0.0166263	Spinous-cell	MAGEH1	MAGEH1
PDLIM3	6.97954e-07	-0.999274	0.032	0.102	0.0166658	Spinous-cell	PDLIM3	PDLIM3
SLC9A6	7.07799e-07	-0.827355	0.227	0.355	0.0169008	Spinous-cell	SLC9A6	SLC9A6
VANGL1	7.28663e-07	-0.620963	0.399	0.521	0.017399	Spinous-cell	VANGL1	VANGL1
TRIM16	7.41095e-07	1.15268	0.554	0.463	0.0176959	Spinous-cell	TRIM16	TRIM16
CDC20	7.60819e-07	-2.16186	0.17	0.28	0.0181668	Spinous-cell	CDC20	CDC20
MKL1	7.69699e-07	-0.769549	0.396	0.525	0.0183789	Spinous-cell	MKL1	MKL1
BCAR1	7.75975e-07	-0.518473	0.327	0.458	0.0185287	Spinous-cell	BCAR1	BCAR1
ARL6IP1	7.85999e-07	-1.36338	0.732	0.836	0.0187681	Spinous-cell	ARL6IP1	ARL6IP1
HMMR-AS1	7.99699e-07	-2.61476	0.009	0.06	0.0190952	Spinous-cell	HMMR-AS1	HMMR-AS1
EMX2	8.03108e-07	-3.70738	0.106	0.203	0.0191766	Spinous-cell	EMX2	EMX2
AGPAT6	8.51554e-07	-1.14797	0.498	0.624	0.0203334	Spinous-cell	AGPAT6	AGPAT6
NIFK-AS1	8.58887e-07	-0.52259	0.294	0.429	0.0205085	Spinous-cell	NIFK-AS1	NIFK-AS1
PFKFB2	8.94132e-07	-0.861356	0.298	0.442	0.0213501	Spinous-cell	PFKFB2	PFKFB2
TMPO-AS1	9e-07	-1.72267	0.02	0.081	0.0214902	Spinous-cell	TMPO-AS1	TMPO-AS1
HACD2	9.05112e-07	-1.07462	0.232	0.357	0.0216123	Spinous-cell	HACD2	HACD2
ERAP2	9.09774e-07	-0.649722	0.402	0.527	0.0217236	Spinous-cell	ERAP2	ERAP2
RHOG	9.27014e-07	-0.561187	0.557	0.676	0.0221352	Spinous-cell	RHOG	RHOG
CREB5	9.30689e-07	-1.50419	0.095	0.191	0.022223	Spinous-cell	CREB5	CREB5
SAT1	9.7778e-07	-0.95913	0.867	0.925	0.0233474	Spinous-cell	SAT1	SAT1
FAM149A	1.00052e-06	-3.9354	0.012	0.066	0.0238904	Spinous-cell	FAM149A	FAM149A
ZNF280B.1	1.01093e-06	-3.84823	0.054	0.133	0.0241389	Spinous-cell	ZNF280B.1	ZNF280B
LINC01317	1.05462e-06	-9.24603	0.002	0.041	0.0251822	Spinous-cell	LINC01317	LINC01317
GABARAPL1	1.07924e-06	-0.742709	0.285	0.407	0.0257701	Spinous-cell	GABARAPL1	GABARAPL1
CDH24	1.09196e-06	-2.91597	0.052	0.131	0.0260738	Spinous-cell	CDH24	CDH24
UBA6	1.10889e-06	-0.59424	0.572	0.697	0.026478	Spinous-cell	UBA6	UBA6
ICA1	1.11574e-06	-1.11419	0.27	0.392	0.0266415	Spinous-cell	ICA1	ICA1
GABPB1	1.12187e-06	-0.849944	0.271	0.407	0.0267881	Spinous-cell	GABPB1	GABPB1
SEMA3C	1.13979e-06	-0.893888	0.414	0.525	0.0272158	Spinous-cell	SEMA3C	SEMA3C
MAP3K12	1.14097e-06	-1.55166	0.031	0.098	0.027244	Spinous-cell	MAP3K12	MAP3K12
PLD1	1.14489e-06	1.3032	0.638	0.55	0.0273377	Spinous-cell	PLD1	PLD1
CLN6	1.15082e-06	-0.630054	0.428	0.562	0.0274793	Spinous-cell	CLN6	CLN6
PTGES	1.15514e-06	1.36371	0.606	0.537	0.0275825	Spinous-cell	PTGES	PTGES
IL16	1.16274e-06	-2.38274	0.158	0.266	0.027764	Spinous-cell	IL16	IL16
DUT	1.1778e-06	-0.60764	0.883	0.931	0.0281236	Spinous-cell	DUT	DUT
BARX2	1.18732e-06	0.728563	0.541	0.419	0.0283508	Spinous-cell	BARX2	BARX2
PRELP	1.191e-06	-5.62849	0.222	0.322	0.0284388	Spinous-cell	PRELP	PRELP
SLC27A6	1.20261e-06	-1.37961	0.069	0.156	0.028716	Spinous-cell	SLC27A6	SLC27A6
SERPINB7	1.20834e-06	-2.16666	0.178	0.29	0.0288528	Spinous-cell	SERPINB7	SERPINB7
CLEC2B	1.21291e-06	1.06321	0.873	0.855	0.0289619	Spinous-cell	CLEC2B	CLEC2B
LMNB2	1.21616e-06	-1.24403	0.403	0.512	0.0290396	Spinous-cell	LMNB2	LMNB2
IFT140	1.24771e-06	-0.64391	0.153	0.264	0.0297929	Spinous-cell	IFT140	IFT140
RALGPS2	1.25488e-06	1.34577	0.528	0.442	0.029964	Spinous-cell	RALGPS2	RALGPS2
TREM2	1.30463e-06	-5.49079	0.017	0.073	0.0311519	Spinous-cell	TREM2	TREM2
ANK2	1.35842e-06	-3.49851	0.051	0.127	0.0324364	Spinous-cell	ANK2	ANK2
CYP39A1	1.35924e-06	1.88431	0.46	0.367	0.0324559	Spinous-cell	CYP39A1	CYP39A1
DTX4	1.36003e-06	-1.61846	0.04	0.112	0.0324748	Spinous-cell	DTX4	DTX4
RAB27A	1.39321e-06	-0.97909	0.351	0.473	0.0332672	Spinous-cell	RAB27A	RAB27A
FADS3	1.39712e-06	-3.26854	0.077	0.162	0.0333605	Spinous-cell	FADS3	FADS3
CCDC74B	1.45804e-06	-1.82406	0.035	0.106	0.0348151	Spinous-cell	CCDC74B	CCDC74B
MYOM2.1	1.4614e-06	-0.553988	0.081	0.176	0.0348953	Spinous-cell	MYOM2.1	MYOM2
INPPL1	1.46617e-06	0.690911	0.342	0.479	0.0350092	Spinous-cell	INPPL1	INPPL1
CRABP1	1.47537e-06	-5.04894	0.164	0.261	0.0352288	Spinous-cell	CRABP1	CRABP1
TEAD1	1.48778e-06	-1.10536	0.33	0.438	0.0355253	Spinous-cell	TEAD1	TEAD1
MIR6716	1.49053e-06	-2.41402	0.011	0.062	0.0355909	Spinous-cell	MIR6716	MIR6716
NUDT10	1.53421e-06	-1.6888	0.014	0.068	0.0366339	Spinous-cell	NUDT10	NUDT10
C2orf81	1.53989e-06	-0.514668	0.028	0.093	0.0367694	Spinous-cell	C2orf81	C2orf81
GATA3	1.546e-06	0.829437	0.9	0.907	0.0369154	Spinous-cell	GATA3	GATA3
ZNF462	1.54672e-06	-0.799508	0.196	0.319	0.0369326	Spinous-cell	ZNF462	ZNF462
EXD2	1.5634e-06	-0.613693	0.285	0.417	0.0373308	Spinous-cell	EXD2	EXD2
GPR115	1.59732e-06	1.75268	0.397	0.284	0.0381408	Spinous-cell	GPR115	GPR115
ABI2	1.64134e-06	-1.14512	0.27	0.396	0.039192	Spinous-cell	ABI2	ABI2
SPPL3	1.64873e-06	1.03474	0.788	0.778	0.0393685	Spinous-cell	SPPL3	SPPL3
KIF1A	1.68569e-06	-3.25868	0.052	0.129	0.0402509	Spinous-cell	KIF1A	KIF1A
NT5M	1.69817e-06	-2.16869	0.029	0.095	0.0405489	Spinous-cell	NT5M	NT5M
WIPF3	1.70078e-06	-0.903119	0.446	0.589	0.0406112	Spinous-cell	WIPF3	WIPF3
CEP19	1.70213e-06	-1.47614	0.055	0.133	0.0406436	Spinous-cell	CEP19	CEP19
CAMK1	1.75015e-06	-4.3053	0.048	0.124	0.0417902	Spinous-cell	CAMK1	CAMK1
MCM10	1.75582e-06	-3.36046	0.081	0.168	0.0419255	Spinous-cell	MCM10	MCM10
NR3C1	1.76096e-06	-0.645985	0.396	0.535	0.0420481	Spinous-cell	NR3C1	NR3C1
QPCT	1.76815e-06	-4.82107	0.402	0.485	0.0422198	Spinous-cell	QPCT	QPCT
LMNB1	1.78807e-06	-1.3124	0.078	0.168	0.0426956	Spinous-cell	LMNB1	LMNB1
FBXO5	1.79523e-06	-1.30633	0.137	0.237	0.0428664	Spinous-cell	FBXO5	FBXO5
ADIRF	1.79764e-06	-1.54586	0.64	0.759	0.042924	Spinous-cell	ADIRF	ADIRF
RTP4	1.80331e-06	-1.19465	0.066	0.151	0.0430594	Spinous-cell	RTP4	RTP4
MORN2	1.8215e-06	-0.662818	0.324	0.454	0.0434938	Spinous-cell	MORN2	MORN2
KRT36	1.84776e-06	-0.663219	0.253	0.386	0.0441207	Spinous-cell	KRT36	KRT36
TMPRSS13	1.86076e-06	1.75609	0.339	0.23	0.0444313	Spinous-cell	TMPRSS13	TMPRSS13
POLA1	1.87826e-06	-0.870332	0.207	0.32	0.0448491	Spinous-cell	POLA1	POLA1
CYP3A5	1.93749e-06	1.71825	0.46	0.347	0.0462634	Spinous-cell	CYP3A5	CYP3A5
FBLN2	2.01647e-06	-2.50094	0.037	0.106	0.0481492	Spinous-cell	FBLN2	FBLN2
TEAD4	2.01821e-06	-0.609348	0.227	0.349	0.0481909	Spinous-cell	TEAD4	TEAD4
ETNK2	2.03104e-06	-0.926148	0.118	0.216	0.0484972	Spinous-cell	ETNK2	ETNK2
CC2D2A	2.03105e-06	-1.21	0.104	0.199	0.0484975	Spinous-cell	CC2D2A	CC2D2A
EPDR1	2.11164e-06	-3.09907	0.044	0.116	0.0504217	Spinous-cell	EPDR1	EPDR1
AKT3.2	2.15042e-06	-1.44338	0.195	0.315	0.0513477	Spinous-cell	AKT3.2	AKT3
SPC24	2.17214e-06	-1.37383	0.028	0.091	0.0518664	Spinous-cell	SPC24	SPC24
PHC2	2.18136e-06	-0.733618	0.408	0.527	0.0520866	Spinous-cell	PHC2	PHC2
CYB561A3	2.18645e-06	-3.64755	0.721	0.793	0.052208	Spinous-cell	CYB561A3	CYB561A3
TFF3	2.22627e-06	-4.13974	0.017	0.071	0.0531589	Spinous-cell	TFF3	TFF3
DMD	2.3099e-06	-0.580624	0.359	0.504	0.0551557	Spinous-cell	DMD	DMD
PPM1M	2.35814e-06	-0.651073	0.133	0.239	0.0563077	Spinous-cell	PPM1M	PPM1M
MCM6	2.37264e-06	-0.931794	0.353	0.463	0.0566539	Spinous-cell	MCM6	MCM6
SLC17A9	2.4112e-06	-4.64167	0.017	0.071	0.0575746	Spinous-cell	SLC17A9	SLC17A9
PLOD2	2.41342e-06	-1.49199	0.172	0.278	0.0576277	Spinous-cell	PLOD2	PLOD2
PDE4A	2.43381e-06	-1.16688	0.06	0.141	0.0581144	Spinous-cell	PDE4A	PDE4A
ZFP36L1	2.45066e-06	0.559502	0.989	0.994	0.0585168	Spinous-cell	ZFP36L1	ZFP36L1
RAI1	2.45892e-06	-0.779741	0.334	0.469	0.0587141	Spinous-cell	RAI1	RAI1
KIAA1456	2.51601e-06	0.512095	0.166	0.278	0.0600774	Spinous-cell	KIAA1456	KIAA1456
METRNL.1	2.54697e-06	1.05626	0.429	0.324	0.0608166	Spinous-cell	METRNL.1	METRNL
SZT2	2.56722e-06	0.701172	0.451	0.598	0.0613002	Spinous-cell	SZT2	SZT2
PRG2	2.58724e-06	0.636987	0.103	0.203	0.0617782	Spinous-cell	PRG2	PRG2
ABCC2	2.61749e-06	-3.96523	0.038	0.106	0.0625004	Spinous-cell	ABCC2	ABCC2
PDCD4	2.65778e-06	0.769961	0.963	0.973	0.0634625	Spinous-cell	PDCD4	PDCD4
GSG2	2.66166e-06	-2.82155	0.014	0.066	0.0635551	Spinous-cell	GSG2	GSG2
NEK3	2.6633e-06	-0.748614	0.201	0.315	0.0635943	Spinous-cell	NEK3	NEK3
SLCO2A1	2.75582e-06	-0.706476	0.215	0.326	0.0658034	Spinous-cell	SLCO2A1	SLCO2A1
ZNF281	2.76249e-06	-0.682735	0.193	0.303	0.0659628	Spinous-cell	ZNF281	ZNF281
ESPL1	2.76351e-06	-2.00856	0.066	0.149	0.0659872	Spinous-cell	ESPL1	ESPL1
RPS6KA2	2.81731e-06	-2.34392	0.17	0.27	0.0672716	Spinous-cell	RPS6KA2	RPS6KA2
GLIPR2	2.83217e-06	-1.3353	0.13	0.226	0.0676265	Spinous-cell	GLIPR2	GLIPR2
KCNMA1	2.84345e-06	-4.21224	0.06	0.139	0.0678959	Spinous-cell	KCNMA1	KCNMA1
FAM174B	2.91612e-06	-2.41268	0.084	0.17	0.0696311	Spinous-cell	FAM174B	FAM174B
TICRR	2.92374e-06	-1.10891	0.037	0.104	0.0698131	Spinous-cell	TICRR	TICRR
NCAPD3	2.95555e-06	-0.555451	0.253	0.369	0.0705726	Spinous-cell	NCAPD3	NCAPD3
SAP30	2.9789e-06	-1.04692	0.129	0.23	0.0711303	Spinous-cell	SAP30	SAP30
ARHGAP11B.1	2.99712e-06	-4.99261	0.012	0.062	0.0715652	Spinous-cell	ARHGAP11B.1	ARHGAP11B
DOCK11	3.01379e-06	-0.727749	0.113	0.214	0.0719633	Spinous-cell	DOCK11	DOCK11
LOC100128164	3.04183e-06	-0.707597	0.147	0.257	0.0726327	Spinous-cell	LOC100128164	LOC100128164
F2R	3.04366e-06	1.51352	0.67	0.597	0.0726766	Spinous-cell	F2R	F2R
TOR3A	3.05627e-06	-0.540043	0.451	0.577	0.0729777	Spinous-cell	TOR3A	TOR3A
TXNDC17	3.09106e-06	-0.547379	0.882	0.927	0.0738082	Spinous-cell	TXNDC17	TXNDC17
TRAF3IP2-AS1	3.10285e-06	-0.582847	0.112	0.21	0.0740899	Spinous-cell	TRAF3IP2-AS1	TRAF3IP2-AS1
C11orf70	3.1473e-06	-1.83143	0.044	0.118	0.0751512	Spinous-cell	C11orf70	C11orf70
FAM129A	3.15744e-06	-1.50127	0.143	0.241	0.0753933	Spinous-cell	FAM129A	FAM129A
PATZ1	3.20523e-06	-1.56027	0.117	0.214	0.0765346	Spinous-cell	PATZ1	PATZ1
PLK4	3.23756e-06	-0.793613	0.123	0.216	0.0773065	Spinous-cell	PLK4	PLK4
PARVG	3.25742e-06	-2.52404	0.032	0.097	0.0777808	Spinous-cell	PARVG	PARVG
C21orf58	3.34949e-06	0.843635	0.101	0.197	0.0799791	Spinous-cell	C21orf58	C21orf58
SSH2	3.39297e-06	-1.15006	0.39	0.512	0.0810174	Spinous-cell	SSH2	SSH2
TTYH1.1	3.4004e-06	-5.96676	0.015	0.068	0.0811948	Spinous-cell	TTYH1.1	TTYH1
AKR1B10	3.47594e-06	1.27068	0.574	0.49	0.0829985	Spinous-cell	AKR1B10	AKR1B10
ATP6V0E2	3.50232e-06	-1.68416	0.153	0.253	0.0836283	Spinous-cell	ATP6V0E2	ATP6V0E2
IL1RN	3.57582e-06	0.875654	0.851	0.813	0.0853835	Spinous-cell	IL1RN	IL1RN
ULK3	3.62409e-06	0.994273	0.71	0.62	0.086536	Spinous-cell	ULK3	ULK3
SDC3	3.62977e-06	-1.19561	0.21	0.322	0.0866716	Spinous-cell	SDC3	SDC3
ANKRD28	3.64692e-06	-0.717223	0.347	0.471	0.0870812	Spinous-cell	ANKRD28	ANKRD28
SRBD1	3.70547e-06	-0.619082	0.17	0.282	0.0884791	Spinous-cell	SRBD1	SRBD1
MDGA2	3.73376e-06	-2.04616	0.015	0.068	0.0891547	Spinous-cell	MDGA2	MDGA2
TYR	3.79781e-06	-5.32748	0.239	0.34	0.0906841	Spinous-cell	TYR	TYR
RASSF3	3.81421e-06	-1.17385	0.261	0.375	0.0910756	Spinous-cell	RASSF3	RASSF3
PPM1H	3.81801e-06	-4.03821	0.029	0.091	0.0911666	Spinous-cell	PPM1H	PPM1H
CKAP2	3.88324e-06	-0.947161	0.474	0.569	0.092724	Spinous-cell	CKAP2	CKAP2
WDHD1	4.03344e-06	-0.918379	0.163	0.266	0.0963105	Spinous-cell	WDHD1	WDHD1
C5orf34	4.03591e-06	-0.795139	0.057	0.133	0.0963694	Spinous-cell	C5orf34	C5orf34
TNFRSF12A	4.03703e-06	-0.833626	0.406	0.531	0.0963962	Spinous-cell	TNFRSF12A	TNFRSF12A
ABCC9	4.14866e-06	-2.04083	0.026	0.087	0.0990617	Spinous-cell	ABCC9	ABCC9
SOX4	4.21316e-06	-0.537474	0.64	0.745	0.100602	Spinous-cell	SOX4	SOX4
LINC01116	4.2881e-06	-3.02608	0.02	0.075	0.102391	Spinous-cell	LINC01116	LINC01116
PNMA6A	4.33861e-06	-8.97551	0.003	0.041	0.103597	Spinous-cell	PNMA6A	PNMA6A
MAMLD1	4.35776e-06	-2.26527	0.041	0.11	0.104055	Spinous-cell	MAMLD1	MAMLD1
SYNPO2	4.35915e-06	-0.937857	0.087	0.176	0.104088	Spinous-cell	SYNPO2	SYNPO2
ADAMTS4	4.4584e-06	-3.3528	0.072	0.153	0.106458	Spinous-cell	ADAMTS4	ADAMTS4
CREB3L2	4.51314e-06	-1.10125	0.219	0.346	0.107765	Spinous-cell	CREB3L2	CREB3L2
AKR7A2P1	4.55113e-06	-0.902072	0.385	0.533	0.108672	Spinous-cell	AKR7A2P1	AKR7A2P1
SCEL	4.59845e-06	2.02762	0.451	0.355	0.109802	Spinous-cell	SCEL	SCEL
MRPS31P5	4.65286e-06	-0.891933	0.167	0.274	0.111101	Spinous-cell	MRPS31P5	MRPS31P5
GALNT7	4.69825e-06	-0.932858	0.118	0.214	0.112185	Spinous-cell	GALNT7	GALNT7
ZNF43.2	4.69866e-06	-1.17008	0.172	0.278	0.112195	Spinous-cell	ZNF43.2	ZNF43
C1orf216	4.7169e-06	-0.970157	0.173	0.278	0.11263	Spinous-cell	C1orf216	C1orf216
SLC35A5	4.86163e-06	-0.685176	0.322	0.442	0.116086	Spinous-cell	SLC35A5	SLC35A5
SCRG1	4.91748e-06	-0.875643	0.011	0.058	0.11742	Spinous-cell	SCRG1	SCRG1
TSPAN6	4.94157e-06	-0.758293	0.322	0.444	0.117995	Spinous-cell	TSPAN6	TSPAN6
KANK2	5.02957e-06	-0.922417	0.077	0.158	0.120096	Spinous-cell	KANK2	KANK2
RFK	5.03171e-06	-0.604581	0.304	0.419	0.120147	Spinous-cell	RFK	RFK
HEBP2	5.1745e-06	0.888305	0.813	0.813	0.123557	Spinous-cell	HEBP2	HEBP2
GBP2	5.1923e-06	0.961192	0.739	0.695	0.123982	Spinous-cell	GBP2	GBP2
ACAA2	5.20232e-06	-0.508651	0.327	0.461	0.124221	Spinous-cell	ACAA2	ACAA2
CYSRT1	5.2129e-06	2.12339	0.238	0.139	0.124474	Spinous-cell	CYSRT1	CYSRT1
C1orf198	5.35011e-06	-1.98626	0.535	0.62	0.12775	Spinous-cell	C1orf198	C1orf198
EDN2	5.38507e-06	-1.45934	0.152	0.255	0.128585	Spinous-cell	EDN2	EDN2
LPIN2	5.40196e-06	-0.835501	0.09	0.181	0.128988	Spinous-cell	LPIN2	LPIN2
FKBP9P1	5.46839e-06	-1.13949	0.172	0.282	0.130574	Spinous-cell	FKBP9P1	FKBP9P1
RAB3B	5.48712e-06	-2.50818	0.029	0.091	0.131021	Spinous-cell	RAB3B	RAB3B
MYCBP2	5.53759e-06	1.07911	0.817	0.757	0.132226	Spinous-cell	MYCBP2	MYCBP2
DLC1	5.58357e-06	-1.54297	0.074	0.153	0.133325	Spinous-cell	DLC1	DLC1
MTBP	5.59414e-06	-1.2011	0.078	0.162	0.133577	Spinous-cell	MTBP	MTBP
KCNE4	5.60779e-06	-3.82518	0.034	0.097	0.133903	Spinous-cell	KCNE4	KCNE4
SRGAP1	5.64088e-06	-0.543662	0.137	0.236	0.134693	Spinous-cell	SRGAP1	SRGAP1
SESTD1	5.66848e-06	-1.25043	0.181	0.286	0.135352	Spinous-cell	SESTD1	SESTD1
STAG3L3	5.84253e-06	-0.505789	0.118	0.216	0.139508	Spinous-cell	STAG3L3	STAG3L3
AHNAK2	5.8903e-06	0.789421	0.945	0.944	0.140649	Spinous-cell	AHNAK2	AHNAK2
TRIM32	6.15074e-06	-0.597451	0.193	0.305	0.146867	Spinous-cell	TRIM32	TRIM32
EPHA5-AS1	6.29753e-06	-12.2996	0	0.031	0.150372	Spinous-cell	EPHA5-AS1	EPHA5-AS1
NCOA7	6.30699e-06	-0.691078	0.485	0.585	0.150598	Spinous-cell	NCOA7	NCOA7
RASSF8-AS1	6.40015e-06	-5.01102	0.008	0.05	0.152823	Spinous-cell	RASSF8-AS1	RASSF8-AS1
RAB10	6.44994e-06	0.610886	0.916	0.923	0.154012	Spinous-cell	RAB10	RAB10
NLGN4Y	6.4549e-06	-1.03359	0.051	0.124	0.15413	Spinous-cell	NLGN4Y	NLGN4Y
GRB10	6.52397e-06	-1.19629	0.078	0.16	0.155779	Spinous-cell	GRB10	GRB10
POU5F1.1	6.53025e-06	-2.17021	0.026	0.085	0.155929	Spinous-cell	POU5F1.1	POU5F1
RHOT1	6.68869e-06	1.17431	0.649	0.544	0.159713	Spinous-cell	RHOT1	RHOT1
TMEM265	6.91659e-06	0.937035	0.517	0.417	0.165154	Spinous-cell	TMEM265	TMEM265
BICD2	6.96625e-06	0.802167	0.83	0.817	0.16634	Spinous-cell	BICD2	BICD2
RUNX3	7.05857e-06	-1.23542	0.183	0.286	0.168544	Spinous-cell	RUNX3	RUNX3
PLEKHB2	7.06281e-06	-0.720422	0.595	0.68	0.168646	Spinous-cell	PLEKHB2	PLEKHB2
SCD	7.23927e-06	-1.60873	0.377	0.49	0.172859	Spinous-cell	SCD	SCD
APH1B	7.24603e-06	-0.808074	0.221	0.33	0.173021	Spinous-cell	APH1B	APH1B
ATF2	7.34839e-06	-0.598027	0.143	0.241	0.175465	Spinous-cell	ATF2	ATF2
NME2.4	7.44601e-06	-3.84757	0.011	0.056	0.177796	Spinous-cell	NME2.4	NME2
TTF2	7.50819e-06	-0.916738	0.293	0.394	0.179281	Spinous-cell	TTF2	TTF2
EPHX2	7.54723e-06	1.22145	0.601	0.519	0.180213	Spinous-cell	EPHX2	EPHX2
MIR6892	7.64961e-06	-1.46132	0.153	0.253	0.182657	Spinous-cell	MIR6892	MIR6892
CEP170.1	7.71598e-06	-0.873974	0.176	0.282	0.184242	Spinous-cell	CEP170.1	CEP170
SOSTDC1	7.82444e-06	1.28863	0.508	0.405	0.186832	Spinous-cell	SOSTDC1	SOSTDC1
PDE4B	7.88773e-06	-0.86966	0.11	0.203	0.188343	Spinous-cell	PDE4B	PDE4B
SFI1	7.9051e-06	-0.789704	0.21	0.322	0.188758	Spinous-cell	SFI1	SFI1
MBP	7.99051e-06	-1.73147	0.603	0.712	0.190797	Spinous-cell	MBP	MBP
MON1B	8.05189e-06	-0.52482	0.296	0.413	0.192263	Spinous-cell	MON1B	MON1B
FAM83H-AS1.1	8.18518e-06	1.35109	0.494	0.384	0.195446	Spinous-cell	FAM83H-AS1.1	FAM83H-AS1
MIR6768	8.24839e-06	-6.18245	0.005	0.042	0.196955	Spinous-cell	MIR6768	MIR6768
PYCR1	8.28366e-06	0.808083	0.164	0.274	0.197797	Spinous-cell	PYCR1	PYCR1
C6orf132	8.29509e-06	0.910537	0.758	0.736	0.19807	Spinous-cell	C6orf132	C6orf132
LINC00263	8.40915e-06	-0.981872	0.077	0.156	0.200794	Spinous-cell	LINC00263	LINC00263
SLC25A30	8.4161e-06	-1.01365	0.144	0.243	0.20096	Spinous-cell	SLC25A30	SLC25A30
KIF15	8.4282e-06	-2.13281	0.071	0.147	0.201249	Spinous-cell	KIF15	KIF15
IFIT5	8.46521e-06	-1.14295	0.192	0.297	0.202132	Spinous-cell	IFIT5	IFIT5
PARPBP	8.5308e-06	-1.29008	0.109	0.195	0.203698	Spinous-cell	PARPBP	PARPBP
COL12A1	8.58183e-06	-0.692254	0.313	0.425	0.204917	Spinous-cell	COL12A1	COL12A1
SLC23A2	8.60542e-06	-1.22397	0.431	0.55	0.20548	Spinous-cell	SLC23A2	SLC23A2
PKHD1	8.61341e-06	-5.63746	0.043	0.108	0.205671	Spinous-cell	PKHD1	PKHD1
MZT1	8.66575e-06	-0.746725	0.434	0.546	0.206921	Spinous-cell	MZT1	MZT1
HS3ST6.1	8.95457e-06	2.44428	0.178	0.091	0.213817	Spinous-cell	HS3ST6.1	HS3ST6
COL24A1	9.00676e-06	-5.8605	0.023	0.077	0.215063	Spinous-cell	COL24A1	COL24A1
CHST10	9.05221e-06	-2.48952	0.048	0.118	0.216149	Spinous-cell	CHST10	CHST10
SPATA6	9.09817e-06	-1.09882	0.129	0.226	0.217246	Spinous-cell	SPATA6	SPATA6
BHLHE41	9.11535e-06	-1.09882	0.127	0.22	0.217656	Spinous-cell	BHLHE41	BHLHE41
RRM2	9.15096e-06	-2.61703	0.241	0.332	0.218507	Spinous-cell	RRM2	RRM2
PYCARD	9.16909e-06	0.592016	0.86	0.863	0.218939	Spinous-cell	PYCARD	PYCARD
RCE1	9.17142e-06	0.695994	0.414	0.533	0.218995	Spinous-cell	RCE1	RCE1
CD97	9.20337e-06	-0.980457	0.118	0.207	0.219758	Spinous-cell	CD97	CD97
LIMS2	9.41396e-06	-2.09722	0.051	0.12	0.224786	Spinous-cell	LIMS2	LIMS2
SMPD1	9.42863e-06	-1.18592	0.385	0.498	0.225137	Spinous-cell	SMPD1	SMPD1
DNAJB9	9.44101e-06	-0.625515	0.313	0.436	0.225432	Spinous-cell	DNAJB9	DNAJB9
HIST1H4C	9.64376e-06	-1.71982	0.73	0.82	0.230274	Spinous-cell	HIST1H4C	HIST1H4C
SEC24D	9.70882e-06	-0.90086	0.264	0.369	0.231827	Spinous-cell	SEC24D	SEC24D
CYP2S1	9.81493e-06	-0.89919	0.195	0.303	0.234361	Spinous-cell	CYP2S1	CYP2S1
LOC100506388.1	9.82041e-06	-1.60549	0.049	0.12	0.234492	Spinous-cell	LOC100506388.1	LOC100506388
NPNT	9.8472e-06	-1.71742	0.081	0.162	0.235132	Spinous-cell	NPNT	NPNT
IQCA1	9.87782e-06	-1.20226	0.034	0.095	0.235863	Spinous-cell	IQCA1	IQCA1
PSEN2	9.92725e-06	-2.89945	0.118	0.201	0.237043	Spinous-cell	PSEN2	PSEN2
MYO1E	1.00572e-05	-0.765906	0.383	0.494	0.240146	Spinous-cell	MYO1E	MYO1E
SOCS2	1.01071e-05	-0.742961	0.113	0.205	0.241337	Spinous-cell	SOCS2	SOCS2
RAP1GAP	1.01074e-05	-3.54787	0.087	0.166	0.241344	Spinous-cell	RAP1GAP	RAP1GAP
MITF	1.01089e-05	-4.35425	0.287	0.373	0.24138	Spinous-cell	MITF	MITF
DNA2	1.03908e-05	-1.05198	0.057	0.129	0.248111	Spinous-cell	DNA2	DNA2
PLAT	1.03941e-05	-1.66294	0.209	0.305	0.248191	Spinous-cell	PLAT	PLAT
WFS1	1.04288e-05	-1.2917	0.311	0.432	0.249019	Spinous-cell	WFS1	WFS1
TOP2A	1.04628e-05	-2.73596	0.278	0.371	0.249831	Spinous-cell	TOP2A	TOP2A
LOC100288637.1	1.06527e-05	-2.30942	0.049	0.118	0.254366	Spinous-cell	LOC100288637.1	LOC100288637
NR4A2	1.0823e-05	-1.52788	0.147	0.243	0.258432	Spinous-cell	NR4A2	NR4A2
MIR6878	1.0888e-05	-0.751185	0.087	0.174	0.259983	Spinous-cell	MIR6878	MIR6878
LOC102723729	1.09123e-05	-2.11594	0.009	0.052	0.260564	Spinous-cell	LOC102723729	LOC102723729
RPL39	1.09488e-05	0.574836	0.975	0.986	0.261436	Spinous-cell	RPL39	RPL39
SLC6A2	1.0973e-05	-1.36363	0.074	0.153	0.262013	Spinous-cell	SLC6A2	SLC6A2
AIG1	1.09804e-05	-0.781137	0.509	0.62	0.26219	Spinous-cell	AIG1	AIG1
IRX3	1.10337e-05	1.11251	0.732	0.697	0.263463	Spinous-cell	IRX3	IRX3
MYCL	1.10464e-05	1.32524	0.523	0.417	0.263765	Spinous-cell	MYCL	MYCL
ZNF526	1.11134e-05	-0.90886	0.161	0.263	0.265366	Spinous-cell	ZNF526	ZNF526
UACA	1.12245e-05	-0.535231	0.4	0.521	0.268019	Spinous-cell	UACA	UACA
CCDC150	1.12362e-05	-1.14432	0.026	0.083	0.268299	Spinous-cell	CCDC150	CCDC150
AUNIP	1.12915e-05	-1.38216	0.055	0.127	0.269617	Spinous-cell	AUNIP	AUNIP
RFTN2	1.13235e-05	-2.20116	0.038	0.1	0.270382	Spinous-cell	RFTN2	RFTN2
GADD45A	1.1434e-05	-1.16235	0.279	0.394	0.273021	Spinous-cell	GADD45A	GADD45A
GMFG	1.16753e-05	-1.69704	0.048	0.116	0.278783	Spinous-cell	GMFG	GMFG
ANTXR2	1.16854e-05	-2.07916	0.126	0.218	0.279023	Spinous-cell	ANTXR2	ANTXR2
CEP131	1.17921e-05	-0.800127	0.15	0.249	0.281571	Spinous-cell	CEP131	CEP131
LOC100507006	1.18388e-05	-2.81407	0.035	0.097	0.282687	Spinous-cell	LOC100507006	LOC100507006
CTSZ	1.21216e-05	-1.90366	0.043	0.108	0.289439	Spinous-cell	CTSZ	CTSZ
PSMC3IP	1.22286e-05	-0.545807	0.113	0.203	0.291995	Spinous-cell	PSMC3IP	PSMC3IP
NTHL1	1.23043e-05	0.618359	0.25	0.367	0.293802	Spinous-cell	NTHL1	NTHL1
ITGA9-AS1	1.24599e-05	-0.83597	0.098	0.187	0.297518	Spinous-cell	ITGA9-AS1	ITGA9-AS1
IL20	1.253e-05	-2.09717	0.058	0.129	0.299191	Spinous-cell	IL20	IL20
ALDH3A2	1.2552e-05	0.611854	0.942	0.946	0.299716	Spinous-cell	ALDH3A2	ALDH3A2
TDRP	1.25839e-05	-1.22736	0.144	0.241	0.300479	Spinous-cell	TDRP	TDRP
MTCL1	1.28999e-05	-0.950074	0.156	0.255	0.308024	Spinous-cell	MTCL1	MTCL1
ST3GAL4-AS1	1.32171e-05	-6.18766	0.011	0.054	0.315598	Spinous-cell	ST3GAL4-AS1	ST3GAL4-AS1
TMEM125	1.32697e-05	3.01332	0.075	0.019	0.316855	Spinous-cell	TMEM125	TMEM125
CORO2B	1.34695e-05	-2.31364	0.02	0.071	0.321625	Spinous-cell	CORO2B	CORO2B
CLDN4	1.3518e-05	3.14753	0.354	0.263	0.322783	Spinous-cell	CLDN4	CLDN4
C2orf74	1.35272e-05	-0.837111	0.138	0.23	0.323002	Spinous-cell	C2orf74	C2orf74
HERC5	1.35665e-05	-0.936393	0.075	0.153	0.323941	Spinous-cell	HERC5	HERC5
ICAM3	1.37683e-05	-0.726077	0.106	0.193	0.328759	Spinous-cell	ICAM3	ICAM3
TNFSF12	1.3887e-05	-0.5805	0.109	0.195	0.331594	Spinous-cell	TNFSF12	TNFSF12
PLIN3	1.38928e-05	0.588538	0.839	0.844	0.331731	Spinous-cell	PLIN3	PLIN3
ARSI	1.44252e-05	-2.11798	0.135	0.224	0.344445	Spinous-cell	ARSI	ARSI
MPP4	1.46462e-05	-0.670269	0.02	0.071	0.349721	Spinous-cell	MPP4	MPP4
FAM105A	1.49905e-05	-2.01175	0.086	0.168	0.357942	Spinous-cell	FAM105A	FAM105A
KIFC2	1.50041e-05	1.66917	0.463	0.367	0.358267	Spinous-cell	KIFC2	KIFC2
FIGNL1	1.50457e-05	-1.00556	0.204	0.305	0.35926	Spinous-cell	FIGNL1	FIGNL1
MIR7110	1.50773e-05	-2.97924	0.011	0.054	0.360015	Spinous-cell	MIR7110	MIR7110
ANKRD13B	1.52524e-05	0.670066	0.124	0.222	0.364198	Spinous-cell	ANKRD13B	ANKRD13B
RRAS	1.53674e-05	-0.505107	0.462	0.566	0.366943	Spinous-cell	RRAS	RRAS
LINC00623	1.55427e-05	-1.62764	0.077	0.156	0.371128	Spinous-cell	LINC00623	LINC00623
TGM3	1.56277e-05	-0.556237	0.153	0.073	0.373159	Spinous-cell	TGM3	TGM3
CCNE2	1.56429e-05	-1.13987	0.089	0.168	0.373522	Spinous-cell	CCNE2	CCNE2
RASGEF1B	1.5747e-05	-0.651243	0.796	0.847	0.376006	Spinous-cell	RASGEF1B	RASGEF1B
PGM2	1.6033e-05	0.931312	0.653	0.618	0.382835	Spinous-cell	PGM2	PGM2
AIM1L	1.6187e-05	1.97351	0.431	0.336	0.386512	Spinous-cell	AIM1L	AIM1L
SAMD10	1.62463e-05	0.761907	0.195	0.104	0.387928	Spinous-cell	SAMD10	SAMD10
HSPB2	1.64332e-05	-3.31171	0.049	0.114	0.392392	Spinous-cell	HSPB2	HSPB2
CNNM1	1.65541e-05	-0.986944	0.052	0.122	0.395279	Spinous-cell	CNNM1	CNNM1
FES	1.66004e-05	-1.67137	0.078	0.153	0.396383	Spinous-cell	FES	FES
MTMR8	1.66058e-05	-1.6735	0.017	0.066	0.396514	Spinous-cell	MTMR8	MTMR8
ARHGDIB	1.68592e-05	-0.872473	0.609	0.71	0.402563	Spinous-cell	ARHGDIB	ARHGDIB
TMEM38B	1.69126e-05	-1.34289	0.164	0.261	0.403839	Spinous-cell	TMEM38B	TMEM38B
FAM53C	1.70634e-05	-0.553449	0.354	0.467	0.407441	Spinous-cell	FAM53C	FAM53C
PLEKHG6	1.73605e-05	1.09562	0.281	0.178	0.414535	Spinous-cell	PLEKHG6	PLEKHG6
DEGS1	1.74072e-05	0.669522	0.989	0.996	0.415649	Spinous-cell	DEGS1	DEGS1
SYTL1	1.7459e-05	0.816944	0.844	0.844	0.416887	Spinous-cell	SYTL1	SYTL1
SOAT2	1.76989e-05	-2.84713	0.003	0.037	0.422614	Spinous-cell	SOAT2	SOAT2
CEP70	1.80422e-05	-0.605659	0.152	0.245	0.430813	Spinous-cell	CEP70	CEP70
CTDSPL2	1.82165e-05	-0.561276	0.363	0.465	0.434975	Spinous-cell	CTDSPL2	CTDSPL2
HECTD2-AS1	1.82322e-05	-2.37188	0.064	0.135	0.435349	Spinous-cell	HECTD2-AS1	HECTD2-AS1
FAM127A	1.82534e-05	-0.608774	0.816	0.896	0.435856	Spinous-cell	FAM127A	FAM127A
C5orf45	1.82732e-05	-0.64706	0.075	0.154	0.436327	Spinous-cell	C5orf45	C5orf45
PLAG1	1.82887e-05	-1.0741	0.04	0.102	0.436698	Spinous-cell	PLAG1	PLAG1
GTF3C2-AS1	1.83356e-05	-0.986115	0.086	0.17	0.437818	Spinous-cell	GTF3C2-AS1	GTF3C2-AS1
CEP152	1.83379e-05	-0.96643	0.109	0.193	0.437871	Spinous-cell	CEP152	CEP152
TACC2	1.83698e-05	1.41071	0.752	0.73	0.438633	Spinous-cell	TACC2	TACC2
EPPK1	1.84613e-05	0.80399	0.773	0.708	0.440819	Spinous-cell	EPPK1	EPPK1
PEPD	1.85089e-05	-0.989429	0.601	0.71	0.441955	Spinous-cell	PEPD	PEPD
ADAM22	1.86736e-05	-6.78228	0.009	0.05	0.445889	Spinous-cell	ADAM22	ADAM22
RCBTB2	1.89434e-05	-1.09754	0.218	0.324	0.45233	Spinous-cell	RCBTB2	RCBTB2
ANKRD22	1.89886e-05	1.10641	0.505	0.421	0.45341	Spinous-cell	ANKRD22	ANKRD22
FUT4	1.9163e-05	-2.54711	0.048	0.112	0.457575	Spinous-cell	FUT4	FUT4
ADAM10	1.97315e-05	-0.54271	0.595	0.693	0.47115	Spinous-cell	ADAM10	ADAM10
GFRA3	1.9786e-05	-2.61746	0.015	0.062	0.472451	Spinous-cell	GFRA3	GFRA3
REEP1	1.99485e-05	0.74748	0.075	0.154	0.47633	Spinous-cell	REEP1	REEP1
HPS5	1.9988e-05	-0.575468	0.262	0.371	0.477274	Spinous-cell	HPS5	HPS5
ST3GAL2	2.01844e-05	0.511155	0.112	0.201	0.481963	Spinous-cell	ST3GAL2	ST3GAL2
FADS6	2.03415e-05	3.72341	0.077	0.021	0.485713	Spinous-cell	FADS6	FADS6
DIXDC1	2.03657e-05	-1.65231	0.115	0.201	0.486293	Spinous-cell	DIXDC1	DIXDC1
HAAO	2.04056e-05	-0.656329	0.124	0.214	0.487245	Spinous-cell	HAAO	HAAO
DFNA5	2.04216e-05	-1.2722	0.19	0.28	0.487628	Spinous-cell	DFNA5	DFNA5
P4HA2-AS1	2.04703e-05	-0.969223	0.144	0.241	0.488791	Spinous-cell	P4HA2-AS1	P4HA2-AS1
WDPCP	2.04854e-05	-1.01452	0.126	0.22	0.489151	Spinous-cell	WDPCP	WDPCP
MTURN	2.0602e-05	-1.0888	0.425	0.55	0.491935	Spinous-cell	MTURN	MTURN
C21orf33.1	2.06733e-05	0.575558	0.057	0.129	0.493636	Spinous-cell	C21orf33.1	C21orf33
GPR161	2.06824e-05	0.611801	0.146	0.239	0.493854	Spinous-cell	GPR161	GPR161
RIN3	2.07627e-05	-1.0856	0.152	0.243	0.495771	Spinous-cell	RIN3	RIN3
LOC728613	2.0788e-05	0.505918	0.123	0.218	0.496375	Spinous-cell	LOC728613	LOC728613
GOLM1	2.08322e-05	-2.3573	0.17	0.259	0.497431	Spinous-cell	GOLM1	GOLM1
ZNF326	2.16782e-05	-0.744867	0.345	0.456	0.517632	Spinous-cell	ZNF326	ZNF326
LOC101928140.1	2.21246e-05	-2.76401	0.038	0.1	0.528291	Spinous-cell	LOC101928140.1	LOC101928140
POF1B	2.23397e-05	1.62027	0.414	0.315	0.533428	Spinous-cell	POF1B	POF1B
GTF2IRD2B	2.23507e-05	-0.503936	0.255	0.367	0.53369	Spinous-cell	GTF2IRD2B	GTF2IRD2B
STPG1	2.25282e-05	-0.853483	0.239	0.347	0.537928	Spinous-cell	STPG1	STPG1
RAD54B	2.27237e-05	-0.770186	0.094	0.176	0.542596	Spinous-cell	RAD54B	RAD54B
LINC00669	2.27942e-05	-0.719245	0.025	0.077	0.54428	Spinous-cell	LINC00669	LINC00669
TMEM147-AS1	2.29269e-05	0.556259	0.186	0.295	0.547448	Spinous-cell	TMEM147-AS1	TMEM147-AS1
ERCC6L	2.31867e-05	-2.6473	0.037	0.097	0.553652	Spinous-cell	ERCC6L	ERCC6L
H2AFX	2.32794e-05	-1.22818	0.362	0.456	0.555867	Spinous-cell	H2AFX	H2AFX
SACS	2.37438e-05	-0.860907	0.179	0.28	0.566954	Spinous-cell	SACS	SACS
C10orf11	2.39885e-05	-2.40832	0.051	0.116	0.572798	Spinous-cell	C10orf11	C10orf11
SOGA1	2.40834e-05	0.585737	0.253	0.369	0.575063	Spinous-cell	SOGA1	SOGA1
LOC284023	2.42673e-05	-0.545987	0.403	0.521	0.579454	Spinous-cell	LOC284023	LOC284023
FTCDNL1	2.43609e-05	-0.846632	0.063	0.135	0.581689	Spinous-cell	FTCDNL1	FTCDNL1
ITGA4	2.44083e-05	-1.01551	0.037	0.097	0.582822	Spinous-cell	ITGA4	ITGA4
LOC101929516	2.44202e-05	0.893816	0.115	0.207	0.583106	Spinous-cell	LOC101929516	LOC101929516
FAM83A	2.45424e-05	0.584486	0.571	0.458	0.586023	Spinous-cell	FAM83A	FAM83A
ITGA2B	2.47084e-05	-4.76915	0.017	0.064	0.589987	Spinous-cell	ITGA2B	ITGA2B
GM2A	2.50239e-05	0.564358	0.877	0.849	0.597521	Spinous-cell	GM2A	GM2A
OR7A5	2.50594e-05	-4.37135	0.014	0.058	0.598368	Spinous-cell	OR7A5	OR7A5
ENO2	2.53189e-05	-0.694353	0.146	0.236	0.604564	Spinous-cell	ENO2	ENO2
TCN2	2.5451e-05	-2.30861	0.077	0.151	0.607719	Spinous-cell	TCN2	TCN2
PRPS1L1	2.55032e-05	-1.04912	0.115	0.208	0.608964	Spinous-cell	PRPS1L1	PRPS1L1
RBL1	2.55726e-05	-1.11912	0.187	0.286	0.610622	Spinous-cell	RBL1	RBL1
C3orf79	2.55912e-05	-6.50265	0.006	0.042	0.611067	Spinous-cell	C3orf79	C3orf79
LOC344887	2.56766e-05	2.59485	0.144	0.069	0.613106	Spinous-cell	LOC344887	LOC344887
LOC101927972	2.5908e-05	1.42979	0.155	0.075	0.61863	Spinous-cell	LOC101927972	LOC101927972
TMEM254	2.59542e-05	1.26429	0.706	0.664	0.619734	Spinous-cell	TMEM254	TMEM254
MIR1292	2.5956e-05	0.596084	0.156	0.259	0.619777	Spinous-cell	MIR1292	MIR1292
ZNF749	2.614e-05	-0.94384	0.192	0.288	0.62417	Spinous-cell	ZNF749	ZNF749
CD24	2.62828e-05	1.62018	0.5	0.427	0.627582	Spinous-cell	CD24	CD24
CSTB	2.63088e-05	1.46027	0.959	0.983	0.628202	Spinous-cell	CSTB	CSTB
GAPDHS	2.63497e-05	-3.81101	0.123	0.205	0.629177	Spinous-cell	GAPDHS	GAPDHS
SLC36A4	2.64155e-05	0.573153	0.196	0.303	0.630749	Spinous-cell	SLC36A4	SLC36A4
DTNB	2.64891e-05	-0.798715	0.215	0.315	0.632506	Spinous-cell	DTNB	DTNB
FAM167B	2.65345e-05	-6.16526	0.006	0.042	0.633592	Spinous-cell	FAM167B	FAM167B
GEM	2.66568e-05	-0.722237	0.11	0.195	0.636512	Spinous-cell	GEM	GEM
DNAH11	2.67138e-05	-2.26447	0.025	0.077	0.637872	Spinous-cell	DNAH11	DNAH11
PLEKHA7	2.68628e-05	2.07658	0.275	0.174	0.64143	Spinous-cell	PLEKHA7	PLEKHA7
SDCBP2.3	2.70125e-05	1.4112	0.227	0.133	0.645005	Spinous-cell	SDCBP2.3	SDCBP2
PLA2G4A	2.71408e-05	-0.830313	0.21	0.305	0.648068	Spinous-cell	PLA2G4A	PLA2G4A
KCNJ13	2.71461e-05	-2.36548	0.094	0.17	0.648194	Spinous-cell	KCNJ13	KCNJ13
BIN1	2.72863e-05	-0.678462	0.163	0.263	0.651543	Spinous-cell	BIN1	BIN1
DLG2	2.78053e-05	0.973711	0.307	0.21	0.663935	Spinous-cell	DLG2	DLG2
RNF220	2.79015e-05	0.524071	0.508	0.641	0.666232	Spinous-cell	RNF220	RNF220
BCL2A1	2.8523e-05	-0.954592	0.052	0.116	0.681073	Spinous-cell	BCL2A1	BCL2A1
TTC22	2.87401e-05	1.39198	0.367	0.257	0.686256	Spinous-cell	TTC22	TTC22
CYP1B1	2.93246e-05	-1.11009	0.077	0.153	0.700214	Spinous-cell	CYP1B1	CYP1B1
FAXDC2	2.95493e-05	-0.632211	0.14	0.232	0.705579	Spinous-cell	FAXDC2	FAXDC2
NLGN4X	2.96081e-05	-1.00115	0.052	0.118	0.706981	Spinous-cell	NLGN4X	NLGN4X
TPD52	2.98761e-05	0.845908	0.845	0.847	0.713382	Spinous-cell	TPD52	TPD52
IGDCC4	3.02359e-05	-3.05532	0.029	0.083	0.721973	Spinous-cell	IGDCC4	IGDCC4
DUSP4	3.0255e-05	-1.02584	0.095	0.176	0.722429	Spinous-cell	DUSP4	DUSP4
RAB6B	3.03269e-05	-2.58992	0.038	0.098	0.724145	Spinous-cell	RAB6B	RAB6B
RTN4RL2	3.03855e-05	-1.06713	0.13	0.222	0.725545	Spinous-cell	RTN4RL2	RTN4RL2
PCDH11X	3.04973e-05	-6.89733	0.002	0.031	0.728214	Spinous-cell	PCDH11X	PCDH11X
C5orf22	3.05359e-05	-0.553372	0.321	0.438	0.729136	Spinous-cell	C5orf22	C5orf22
SLC39A8	3.09711e-05	-0.960165	0.115	0.199	0.739527	Spinous-cell	SLC39A8	SLC39A8
PLBD1	3.12602e-05	1.33463	0.502	0.409	0.746432	Spinous-cell	PLBD1	PLBD1
PRKD1	3.1265e-05	-6.21915	0.015	0.06	0.746546	Spinous-cell	PRKD1	PRKD1
IPO11	3.12944e-05	-0.643307	0.207	0.313	0.747248	Spinous-cell	IPO11	IPO11
FAM72D	3.13473e-05	-2.26043	0.005	0.039	0.748512	Spinous-cell	FAM72D	FAM72D
DNAJC22	3.13473e-05	-3.59853	0.005	0.039	0.748512	Spinous-cell	DNAJC22	DNAJC22
LTB4R	3.15198e-05	0.706849	0.885	0.836	0.752631	Spinous-cell	LTB4R	LTB4R
KRT73	3.17913e-05	4.06506	0.113	0.046	0.759112	Spinous-cell	KRT73	KRT73
UAP1L1	3.22361e-05	-1.12895	0.287	0.39	0.769735	Spinous-cell	UAP1L1	UAP1L1
ADAMTS9-AS2	3.25632e-05	-2.69413	0.005	0.039	0.777543	Spinous-cell	ADAMTS9-AS2	ADAMTS9-AS2
GRIK1	3.27191e-05	-2.78229	0.037	0.095	0.781267	Spinous-cell	GRIK1	GRIK1
APRT	3.27689e-05	0.536912	0.969	0.994	0.782457	Spinous-cell	APRT	APRT
SNURF.1	3.305e-05	-1.01712	0.09	0.174	0.789168	Spinous-cell	SNURF.1	SNURF
LOC101928307	3.34341e-05	-3.37668	0.003	0.035	0.79834	Spinous-cell	LOC101928307	LOC101928307
COA6	3.36452e-05	-0.515188	0.48	0.595	0.80338	Spinous-cell	COA6	COA6
FAM86DP	3.37945e-05	-1.35228	0.121	0.205	0.806945	Spinous-cell	FAM86DP	FAM86DP
ABCD1	3.38457e-05	-0.887474	0.054	0.12	0.808167	Spinous-cell	ABCD1	ABCD1
LOC400043	3.43556e-05	-2.92559	0.061	0.129	0.820342	Spinous-cell	LOC400043	LOC400043
DLX5	3.45033e-05	1.38526	0.279	0.176	0.823869	Spinous-cell	DLX5	DLX5
PRSS12	3.45944e-05	-0.640245	0.161	0.263	0.826046	Spinous-cell	PRSS12	PRSS12
PCBD2	3.47363e-05	-0.60906	0.294	0.411	0.829433	Spinous-cell	PCBD2	PCBD2
APOOP5	3.4739e-05	1.51776	0.133	0.23	0.829498	Spinous-cell	APOOP5	APOOP5
GNE	3.47625e-05	-2.45148	0.092	0.168	0.83006	Spinous-cell	GNE	GNE
CES1.1	3.50839e-05	-2.17089	0.009	0.048	0.837734	Spinous-cell	CES1.1	CES1
CASD1	3.51586e-05	0.828492	0.135	0.228	0.839517	Spinous-cell	CASD1	CASD1
CACNB4	3.52002e-05	-0.731574	0.169	0.264	0.840511	Spinous-cell	CACNB4	CACNB4
RYR2	3.55005e-05	-4.01641	0.037	0.095	0.84768	Spinous-cell	RYR2	RYR2
KRT2	3.58183e-05	2.73927	0.632	0.554	0.85527	Spinous-cell	KRT2	KRT2
GBAP1.1	3.59765e-05	-1.69231	0.028	0.081	0.859046	Spinous-cell	GBAP1.1	GBAP1
LOC101927746	3.63745e-05	-0.587366	0.072	0.145	0.868551	Spinous-cell	LOC101927746	LOC101927746
DUSP6	3.69667e-05	-1.08871	0.322	0.427	0.882692	Spinous-cell	DUSP6	DUSP6
ADAMTS2	3.71643e-05	-5.04871	0.018	0.066	0.887409	Spinous-cell	ADAMTS2	ADAMTS2
WIPF1	3.76136e-05	-1.20257	0.067	0.139	0.898137	Spinous-cell	WIPF1	WIPF1
SLC45A3	3.81019e-05	-2.04347	0.06	0.127	0.909798	Spinous-cell	SLC45A3	SLC45A3
GPNMB	3.82243e-05	-1.31627	0.969	0.992	0.912719	Spinous-cell	GPNMB	GPNMB
DISP1	3.8396e-05	-1.20999	0.104	0.183	0.916819	Spinous-cell	DISP1	DISP1
MTSS1	3.90728e-05	1.09661	0.704	0.643	0.932981	Spinous-cell	MTSS1	MTSS1
GARNL3	3.92915e-05	-1.29569	0.107	0.191	0.938202	Spinous-cell	GARNL3	GARNL3
CEP57L1	3.95988e-05	-1.97703	0.132	0.218	0.94554	Spinous-cell	CEP57L1	CEP57L1
TMX3	3.96507e-05	-0.793456	0.429	0.541	0.946778	Spinous-cell	TMX3	TMX3
AGAP1	4.02607e-05	-0.782317	0.195	0.29	0.961346	Spinous-cell	AGAP1	AGAP1
FMO1	4.03575e-05	-0.594531	0.213	0.313	0.963657	Spinous-cell	FMO1	FMO1
ATP10A	4.03678e-05	-1.58128	0.025	0.075	0.963902	Spinous-cell	ATP10A	ATP10A
PPL	4.04951e-05	0.757131	0.839	0.811	0.966943	Spinous-cell	PPL	PPL
CYP4F12	4.05436e-05	0.745204	0.613	0.527	0.9681	Spinous-cell	CYP4F12	CYP4F12
PILRA	4.05868e-05	-1.41681	0.035	0.093	0.969132	Spinous-cell	PILRA	PILRA
LBX2-AS1	4.15345e-05	-3.13775	0.026	0.077	0.991761	Spinous-cell	LBX2-AS1	LBX2-AS1
PGBD1	4.22522e-05	-1.64045	0.06	0.127	1	Spinous-cell	PGBD1	PGBD1
EPHB6.2	4.24083e-05	1.15891	0.798	0.813	1	Spinous-cell	EPHB6.2	EPHB6
GLB1L	4.26789e-05	-1.16674	0.094	0.168	1	Spinous-cell	GLB1L	GLB1L
CEACAM19	4.33972e-05	1.71562	0.287	0.197	1	Spinous-cell	CEACAM19	CEACAM19
PON2	4.34723e-05	-0.891875	0.603	0.701	1	Spinous-cell	PON2	PON2
CDK15	4.34945e-05	-2.60228	0.035	0.091	1	Spinous-cell	CDK15	CDK15
TENM2	4.41971e-05	-0.551116	0.402	0.512	1	Spinous-cell	TENM2	TENM2
LAMC2	4.51575e-05	-1.09107	0.606	0.678	1	Spinous-cell	LAMC2	LAMC2
CNTNAP1	4.51829e-05	-2.94687	0.025	0.075	1	Spinous-cell	CNTNAP1	CNTNAP1
ADPRH	4.569e-05	-3.73032	0.046	0.106	1	Spinous-cell	ADPRH	ADPRH
RAB3IL1	4.62416e-05	-1.87822	0.017	0.062	1	Spinous-cell	RAB3IL1	RAB3IL1
MCPH1	4.67825e-05	-0.517328	0.279	0.382	1	Spinous-cell	MCPH1	MCPH1
PID1	4.67847e-05	-1.20988	0.075	0.147	1	Spinous-cell	PID1	PID1
HAS2-AS1	4.70468e-05	-4.38284	0.014	0.056	1	Spinous-cell	HAS2-AS1	HAS2-AS1
FBXO32	4.71461e-05	-0.525038	0.359	0.458	1	Spinous-cell	FBXO32	FBXO32
PNPLA1	4.73656e-05	2.30347	0.129	0.06	1	Spinous-cell	PNPLA1	PNPLA1
STK38L	4.74973e-05	0.585183	0.36	0.494	1	Spinous-cell	STK38L	STK38L
LCP2	4.75e-05	-1.5685	0.054	0.12	1	Spinous-cell	LCP2	LCP2
MYH14	4.77824e-05	1.74175	0.492	0.415	1	Spinous-cell	MYH14	MYH14
CERS1.1	4.80262e-05	-7.10187	0.006	0.041	1	Spinous-cell	CERS1.1	CERS1
SMG1P1	4.81653e-05	-0.648809	0.032	0.089	1	Spinous-cell	SMG1P1	SMG1P1
CAMK2N1	4.85292e-05	-1.50014	0.109	0.189	1	Spinous-cell	CAMK2N1	CAMK2N1
MYO16	4.94121e-05	-4.41058	0.028	0.079	1	Spinous-cell	MYO16	MYO16
KRT77	5.02583e-05	4.15423	0.298	0.212	1	Spinous-cell	KRT77	KRT77
NTF3	5.03598e-05	-2.32491	0.014	0.056	1	Spinous-cell	NTF3	NTF3
AACS	5.07437e-05	0.818324	0.669	0.579	1	Spinous-cell	AACS	AACS
SUSD3	5.10979e-05	-3.87705	0.014	0.056	1	Spinous-cell	SUSD3	SUSD3
EPN2	5.15651e-05	1.17295	0.719	0.687	1	Spinous-cell	EPN2	EPN2
SYDE1	5.18968e-05	-1.68626	0.092	0.168	1	Spinous-cell	SYDE1	SYDE1
NGEF	5.25258e-05	-0.582553	0.271	0.371	1	Spinous-cell	NGEF	NGEF
SAA1	5.25416e-05	-2.08403	0.089	0.166	1	Spinous-cell	SAA1	SAA1
RAD1	5.28203e-05	-0.508967	0.357	0.465	1	Spinous-cell	RAD1	RAD1
TLE1	5.28659e-05	-0.511746	0.385	0.496	1	Spinous-cell	TLE1	TLE1
GNA12	5.40902e-05	-1.23742	0.241	0.336	1	Spinous-cell	GNA12	GNA12
CNTFR	5.41853e-05	1.0509	0.028	0.079	1	Spinous-cell	CNTFR	CNTFR
DNAH6	5.67481e-05	0.816238	0.101	0.185	1	Spinous-cell	DNAH6	DNAH6
TMEM8B	5.72512e-05	-0.721417	0.166	0.263	1	Spinous-cell	TMEM8B	TMEM8B
DSTYK	5.73791e-05	-1.94916	0.451	0.548	1	Spinous-cell	DSTYK	DSTYK
FANCB	5.74827e-05	-0.989986	0.041	0.1	1	Spinous-cell	FANCB	FANCB
ADAP2	5.74929e-05	1.38009	0.248	0.162	1	Spinous-cell	ADAP2	ADAP2
HES6	5.74988e-05	-1.05494	0.069	0.139	1	Spinous-cell	HES6	HES6
ZNF770	5.83509e-05	0.732227	0.833	0.857	1	Spinous-cell	ZNF770	ZNF770
ACOT4	5.88897e-05	-1.1171	0.034	0.089	1	Spinous-cell	ACOT4	ACOT4
PINX1	5.90493e-05	0.58248	0.322	0.442	1	Spinous-cell	PINX1	PINX1
TGM5	5.92436e-05	2.46596	0.146	0.073	1	Spinous-cell	TGM5	TGM5
DENND5B	5.96164e-05	-4.0123	0.046	0.106	1	Spinous-cell	DENND5B	DENND5B
RUSC2	6.02365e-05	-1.56267	0.077	0.149	1	Spinous-cell	RUSC2	RUSC2
GAS2L3	6.07232e-05	-2.2602	0.081	0.151	1	Spinous-cell	GAS2L3	GAS2L3
SAMD13	6.09892e-05	-4.60956	0.009	0.046	1	Spinous-cell	SAMD13	SAMD13
PABPC5	6.14366e-05	-9.84953	0.003	0.033	1	Spinous-cell	PABPC5	PABPC5
ARAP2	6.14578e-05	1.01508	0.571	0.502	1	Spinous-cell	ARAP2	ARAP2
OSBPL2	6.18178e-05	1.16714	0.702	0.674	1	Spinous-cell	OSBPL2	OSBPL2
STARD10	6.18649e-05	0.687607	0.753	0.71	1	Spinous-cell	STARD10	STARD10
TM6SF1	6.18989e-05	-3.08284	0.035	0.091	1	Spinous-cell	TM6SF1	TM6SF1
PASK	6.19452e-05	-0.547999	0.141	0.232	1	Spinous-cell	PASK	PASK
SIX5	6.21711e-05	-0.570972	0.202	0.301	1	Spinous-cell	SIX5	SIX5
TBCD.2	6.22159e-05	-0.625545	0.452	0.542	1	Spinous-cell	TBCD.2	TBCD
DUOXA1	6.23145e-05	0.91561	0.676	0.62	1	Spinous-cell	DUOXA1	DUOXA1
DBN1	6.24223e-05	-0.64987	0.268	0.376	1	Spinous-cell	DBN1	DBN1
LURAP1L-AS1	6.24794e-05	-6.37089	0.003	0.033	1	Spinous-cell	LURAP1L-AS1	LURAP1L-AS1
SFRP1	6.38962e-05	-0.500909	0.502	0.602	1	Spinous-cell	SFRP1	SFRP1
LOC339803	6.42116e-05	-1.42143	0.08	0.151	1	Spinous-cell	LOC339803	LOC339803
CCDC8	6.46174e-05	-0.629071	0.147	0.241	1	Spinous-cell	CCDC8	CCDC8
PLEKHA5	6.52397e-05	-0.652083	0.405	0.498	1	Spinous-cell	PLEKHA5	PLEKHA5
CENPL	6.53259e-05	-0.628711	0.097	0.172	1	Spinous-cell	CENPL	CENPL
OGG1	6.62208e-05	-0.504505	0.204	0.305	1	Spinous-cell	OGG1	OGG1
LYSMD3	6.63737e-05	-0.796183	0.29	0.392	1	Spinous-cell	LYSMD3	LYSMD3
PSMB8-AS1.1	6.70765e-05	-1.19206	0.225	0.324	1	Spinous-cell	PSMB8-AS1.1	PSMB8-AS1
ARHGEF37	6.73569e-05	1.37678	0.594	0.525	1	Spinous-cell	ARHGEF37	ARHGEF37
PLA2G3	6.86325e-05	1.85839	0.204	0.124	1	Spinous-cell	PLA2G3	PLA2G3
ZNF232	6.89681e-05	-0.70653	0.238	0.344	1	Spinous-cell	ZNF232	ZNF232
KIAA1524	6.95314e-05	-1.74858	0.086	0.158	1	Spinous-cell	KIAA1524	KIAA1524
SAPCD2	6.99432e-05	-1.29959	0.113	0.193	1	Spinous-cell	SAPCD2	SAPCD2
HSPA8	7.00421e-05	-0.514911	0.959	0.975	1	Spinous-cell	HSPA8	HSPA8
COBL	7.108e-05	1.35483	0.362	0.27	1	Spinous-cell	COBL	COBL
GDNF	7.11909e-05	3.23147	0.025	0.073	1	Spinous-cell	GDNF	GDNF
PKN1	7.15695e-05	-1.55621	0.048	0.108	1	Spinous-cell	PKN1	PKN1
CTNS	7.16475e-05	-0.844984	0.267	0.376	1	Spinous-cell	CTNS	CTNS
IL12RB2	7.18471e-05	-1.98284	0.141	0.222	1	Spinous-cell	IL12RB2	IL12RB2
GNAZ	7.2128e-05	-3.95756	0.063	0.129	1	Spinous-cell	GNAZ	GNAZ
ABCB4	7.31311e-05	-4.19759	0.02	0.066	1	Spinous-cell	ABCB4	ABCB4
TNS4	7.31967e-05	-0.583627	0.906	0.911	1	Spinous-cell	TNS4	TNS4
KCNIP3	7.33076e-05	-2.48698	0.032	0.085	1	Spinous-cell	KCNIP3	KCNIP3
GRIK2	7.33185e-05	-1.36812	0.038	0.095	1	Spinous-cell	GRIK2	GRIK2
KDELC1	7.41314e-05	-0.694029	0.069	0.137	1	Spinous-cell	KDELC1	KDELC1
PLEKHG4B	7.41736e-05	-1.9971	0.06	0.125	1	Spinous-cell	PLEKHG4B	PLEKHG4B
XK	7.42685e-05	3.54039	0.048	0.008	1	Spinous-cell	XK	XK
DCHS1	7.45602e-05	-3.79826	0.041	0.098	1	Spinous-cell	DCHS1	DCHS1
ENSA	7.48909e-05	0.552769	0.959	0.981	1	Spinous-cell	ENSA	ENSA
MCOLN2	7.54707e-05	-2.63217	0.044	0.102	1	Spinous-cell	MCOLN2	MCOLN2
CA12	7.56141e-05	0.571948	0.965	0.938	1	Spinous-cell	CA12	CA12
LINC00462	7.61255e-05	-2.95443	0.048	0.106	1	Spinous-cell	LINC00462	LINC00462
HIST1H2AM	7.71749e-05	-1.33352	0.017	0.06	1	Spinous-cell	HIST1H2AM	HIST1H2AM
GLIDR	7.75357e-05	-0.920912	0.129	0.212	1	Spinous-cell	GLIDR	GLIDR
KIFC1.1	7.76249e-05	-2.9239	0.067	0.133	1	Spinous-cell	KIFC1.1	KIFC1
AGT	7.86643e-05	-7.27606	0.008	0.042	1	Spinous-cell	AGT	AGT
NLGN1	7.93544e-05	-5.07	0.011	0.048	1	Spinous-cell	NLGN1	NLGN1
LRRC7	7.98507e-05	-6.71876	0.014	0.054	1	Spinous-cell	LRRC7	LRRC7
LINC01254	8.10987e-05	-1.55985	0.052	0.114	1	Spinous-cell	LINC01254	LINC01254
MKNK2	8.15356e-05	0.723704	0.817	0.826	1	Spinous-cell	MKNK2	MKNK2
FOXD3	8.18025e-05	-2.64706	0.008	0.042	1	Spinous-cell	FOXD3	FOXD3
CNIH2	8.19319e-05	-3.62474	0.037	0.091	1	Spinous-cell	CNIH2	CNIH2
NIM1K	8.22871e-05	-1.13247	0.021	0.068	1	Spinous-cell	NIM1K	NIM1K
XRCC2	8.23715e-05	-1.11399	0.031	0.083	1	Spinous-cell	XRCC2	XRCC2
PDXP	8.27094e-05	-1.30378	0.083	0.154	1	Spinous-cell	PDXP	PDXP
TTC3	8.46111e-05	-1.47487	0.755	0.815	1	Spinous-cell	TTC3	TTC3
TARBP2	8.48361e-05	0.562963	0.342	0.442	1	Spinous-cell	TARBP2	TARBP2
GPAT2	8.50697e-05	-1.94564	0.055	0.12	1	Spinous-cell	GPAT2	GPAT2
ITGB2	8.61266e-05	-1.06725	0.069	0.137	1	Spinous-cell	ITGB2	ITGB2
SMARCD3	8.73502e-05	-0.712245	0.245	0.34	1	Spinous-cell	SMARCD3	SMARCD3
TMEM67	8.74602e-05	-0.932446	0.132	0.218	1	Spinous-cell	TMEM67	TMEM67
BCL2	8.82896e-05	-0.557424	0.14	0.228	1	Spinous-cell	BCL2	BCL2
EEF2K	8.86601e-05	1.31945	0.79	0.774	1	Spinous-cell	EEF2K	EEF2K
PCNXL4	8.87495e-05	-0.757086	0.304	0.402	1	Spinous-cell	PCNXL4	PCNXL4
LAMP1	9.05398e-05	0.796418	0.917	0.946	1	Spinous-cell	LAMP1	LAMP1
KIF14	9.11142e-05	-1.06613	0.06	0.124	1	Spinous-cell	KIF14	KIF14
PAXIP1	9.11144e-05	-0.565125	0.216	0.313	1	Spinous-cell	PAXIP1	PAXIP1
C11orf96	9.21912e-05	-3.62567	0.023	0.069	1	Spinous-cell	C11orf96	C11orf96
FAM13A	9.2491e-05	-0.505294	0.267	0.365	1	Spinous-cell	FAM13A	FAM13A
NRCAM	9.25678e-05	-5.67147	0.023	0.069	1	Spinous-cell	NRCAM	NRCAM
MRAS	9.29214e-05	-4.33041	0.037	0.091	1	Spinous-cell	MRAS	MRAS
HSF4	9.34512e-05	-1.03624	0.287	0.386	1	Spinous-cell	HSF4	HSF4
TSGA10IP	9.44523e-05	-1.69112	0.011	0.048	1	Spinous-cell	TSGA10IP	TSGA10IP
CST2	9.45119e-05	-18.6712	0	0.023	1	Spinous-cell	CST2	CST2
CX3CL1	9.47134e-05	-0.535454	0.141	0.226	1	Spinous-cell	CX3CL1	CX3CL1
NPHP1	9.58332e-05	-0.742786	0.046	0.106	1	Spinous-cell	NPHP1	NPHP1
MIR6826	9.68266e-05	-0.54449	0.215	0.315	1	Spinous-cell	MIR6826	MIR6826
HPGD	9.70299e-05	-1.27045	0.268	0.353	1	Spinous-cell	HPGD	HPGD
RAMP2-AS1	9.74726e-05	1.11152	0.017	0.06	1	Spinous-cell	RAMP2-AS1	RAMP2-AS1
GREB1	9.76135e-05	-3.13608	0.058	0.12	1	Spinous-cell	GREB1	GREB1
PBLD	9.80406e-05	-1.64899	0.06	0.124	1	Spinous-cell	PBLD	PBLD
TEX261	9.93619e-05	-0.620137	0.508	0.608	1	Spinous-cell	TEX261	TEX261
TDRD3	9.96387e-05	-0.5137	0.35	0.45	1	Spinous-cell	TDRD3	TDRD3
LOC653602	0.000101326	1.42734	0.273	0.181	1	Spinous-cell	LOC653602	LOC653602
PRCD	0.000101411	-6.49225	0.012	0.05	1	Spinous-cell	PRCD	PRCD
SLC16A5	0.00010255	-0.63211	0.282	0.375	1	Spinous-cell	SLC16A5	SLC16A5
ATP8A2	0.000103778	-1.92461	0.018	0.062	1	Spinous-cell	ATP8A2	ATP8A2
TMEM134	0.000104789	0.565005	0.92	0.932	1	Spinous-cell	TMEM134	TMEM134
EPOR	0.000106499	-2.46262	0.052	0.112	1	Spinous-cell	EPOR	EPOR
SLBP	0.000107481	-0.512922	0.724	0.822	1	Spinous-cell	SLBP	SLBP
STARD13	0.000108567	-1.57375	0.077	0.147	1	Spinous-cell	STARD13	STARD13
CCDC149	0.000109156	-1.07858	0.104	0.181	1	Spinous-cell	CCDC149	CCDC149
PRKCQ	0.000109649	-1.48245	0.064	0.129	1	Spinous-cell	PRKCQ	PRKCQ
MICU3	0.000110388	-3.50531	0.02	0.064	1	Spinous-cell	MICU3	MICU3
LOC100289511	0.000110939	-0.683868	0.123	0.207	1	Spinous-cell	LOC100289511	LOC100289511
EVC	0.000111437	-0.863167	0.123	0.207	1	Spinous-cell	EVC	EVC
CTSH	0.000111771	-2.57425	0.209	0.292	1	Spinous-cell	CTSH	CTSH
DHFRL1	0.000112246	0.618117	0.15	0.243	1	Spinous-cell	DHFRL1	DHFRL1
MMP2	0.000112761	-4.16029	0.025	0.071	1	Spinous-cell	MMP2	MMP2
P2RX7	0.000113104	-1.10304	0.229	0.32	1	Spinous-cell	P2RX7	P2RX7
APOBEC3B	0.000113665	-0.689199	0.086	0.158	1	Spinous-cell	APOBEC3B	APOBEC3B
ANO5	0.000113826	-6.68859	0.012	0.05	1	Spinous-cell	ANO5	ANO5
NR2F2	0.000113864	-1.0397	0.078	0.147	1	Spinous-cell	NR2F2	NR2F2
ANKRA2	0.000113918	-0.78254	0.388	0.49	1	Spinous-cell	ANKRA2	ANKRA2
CALHM2	0.00011447	-3.49718	0.046	0.102	1	Spinous-cell	CALHM2	CALHM2
ARMCX4	0.000115347	-0.543795	0.16	0.243	1	Spinous-cell	ARMCX4	ARMCX4
SH3BP2	0.000115456	1.05633	0.87	0.855	1	Spinous-cell	SH3BP2	SH3BP2
HIST1H3C	0.000116005	-2.90735	0.143	0.226	1	Spinous-cell	HIST1H3C	HIST1H3C
HIST1H3J	0.000117077	-2.05126	0.025	0.071	1	Spinous-cell	HIST1H3J	HIST1H3J
LYN	0.000117135	-2.55736	0.11	0.185	1	Spinous-cell	LYN	LYN
KLHL13	0.000117153	-1.20602	0.041	0.097	1	Spinous-cell	KLHL13	KLHL13
FOLR3	0.000117807	-3.39294	0.009	0.044	1	Spinous-cell	FOLR3	FOLR3
LGALSL	0.000117955	1.30868	0.604	0.568	1	Spinous-cell	LGALSL	LGALSL
ISG15	0.000118374	-0.542803	0.121	0.207	1	Spinous-cell	ISG15	ISG15
TM7SF2	0.0001184	2.13912	0.232	0.147	1	Spinous-cell	TM7SF2	TM7SF2
ATP2C2	0.000118598	1.22249	0.195	0.118	1	Spinous-cell	ATP2C2	ATP2C2
PIF1	0.000120219	-3.0256	0.028	0.075	1	Spinous-cell	PIF1	PIF1
PPP1R26	0.00012035	-1.23996	0.129	0.208	1	Spinous-cell	PPP1R26	PPP1R26
VSIG10	0.000120505	-0.715235	0.086	0.158	1	Spinous-cell	VSIG10	VSIG10
RPP25	0.000121353	-0.866939	0.147	0.23	1	Spinous-cell	RPP25	RPP25
FERMT3	0.000122961	-1.68932	0.103	0.176	1	Spinous-cell	FERMT3	FERMT3
MICB.3	0.000123043	-1.20657	0.066	0.131	1	Spinous-cell	MICB.3	MICB
IFIT2	0.000123777	-1.03863	0.087	0.158	1	Spinous-cell	IFIT2	IFIT2
ABCA8	0.000124898	-3.09672	0.012	0.05	1	Spinous-cell	ABCA8	ABCA8
FHL3	0.000125534	-0.643429	0.41	0.51	1	Spinous-cell	FHL3	FHL3
GNB2	0.000127178	0.632886	0.908	0.907	1	Spinous-cell	GNB2	GNB2
CNTRL	0.000127663	-0.89573	0.232	0.326	1	Spinous-cell	CNTRL	CNTRL
CEMIP	0.000128834	0.789679	0.066	0.131	1	Spinous-cell	CEMIP	CEMIP
TPM3P9	0.000130928	-0.752673	0.14	0.226	1	Spinous-cell	TPM3P9	TPM3P9
GRIN2A	0.000136589	-1.69587	0.055	0.116	1	Spinous-cell	GRIN2A	GRIN2A
EGOT	0.000136728	-1.30245	0.021	0.066	1	Spinous-cell	EGOT	EGOT
JAG1	0.000137626	0.832489	0.863	0.819	1	Spinous-cell	JAG1	JAG1
DSG2	0.000138842	-0.793328	0.345	0.44	1	Spinous-cell	DSG2	DSG2
NIPAL4	0.000140043	0.657609	0.58	0.498	1	Spinous-cell	NIPAL4	NIPAL4
ZNF488	0.000140488	-0.868937	0.04	0.095	1	Spinous-cell	ZNF488	ZNF488
RBPMS	0.000141108	-0.538724	0.224	0.319	1	Spinous-cell	RBPMS	RBPMS
NCALD	0.000141173	-0.520261	0.081	0.153	1	Spinous-cell	NCALD	NCALD
SLURP1	0.000142659	2.96202	0.207	0.125	1	Spinous-cell	SLURP1	SLURP1
CYSLTR2	0.000143124	-7.77149	0.011	0.046	1	Spinous-cell	CYSLTR2	CYSLTR2
EPHB3	0.000143373	1.03921	0.647	0.577	1	Spinous-cell	EPHB3	EPHB3
NUP155	0.000143768	-0.961115	0.239	0.324	1	Spinous-cell	NUP155	NUP155
HRH2	0.000144013	-0.930261	0.054	0.114	1	Spinous-cell	HRH2	HRH2
PRDM5	0.000144465	-1.24609	0.057	0.118	1	Spinous-cell	PRDM5	PRDM5
HIST1H3F	0.000144578	-5.99073	0.011	0.046	1	Spinous-cell	HIST1H3F	HIST1H3F
IFT46	0.000146315	0.522764	0.31	0.417	1	Spinous-cell	IFT46	IFT46
LLGL2	0.000146358	1.19741	0.489	0.403	1	Spinous-cell	LLGL2	LLGL2
DSCC1	0.000146994	-0.699101	0.101	0.176	1	Spinous-cell	DSCC1	DSCC1
TSPAN7	0.000148008	-0.562932	0.032	0.083	1	Spinous-cell	TSPAN7	TSPAN7
SLC9B1	0.000148209	-1.0863	0.293	0.403	1	Spinous-cell	SLC9B1	SLC9B1
THSD7A	0.000148968	-3.78056	0.017	0.058	1	Spinous-cell	THSD7A	THSD7A
ABCA12	0.000150161	1.10014	0.379	0.297	1	Spinous-cell	ABCA12	ABCA12
CAPN3	0.000150405	-3.8915	0.456	0.51	1	Spinous-cell	CAPN3	CAPN3
CAMSAP3	0.000151183	1.70881	0.422	0.334	1	Spinous-cell	CAMSAP3	CAMSAP3
LRRC36	0.000151381	-4.27551	0.014	0.052	1	Spinous-cell	LRRC36	LRRC36
CLMN	0.00015175	-0.687478	0.138	0.216	1	Spinous-cell	CLMN	CLMN
TMPRSS6	0.000152083	-0.532831	0.06	0.124	1	Spinous-cell	TMPRSS6	TMPRSS6
LOC101928227	0.000152235	-0.56705	0.02	0.064	1	Spinous-cell	LOC101928227	LOC101928227
GRASP	0.000152415	-1.54345	0.048	0.104	1	Spinous-cell	GRASP	GRASP
SLC44A3	0.000152528	1.28382	0.144	0.073	1	Spinous-cell	SLC44A3	SLC44A3
ASAP3	0.000152942	1.39657	0.337	0.243	1	Spinous-cell	ASAP3	ASAP3
DUSP9	0.000152959	-1.83901	0.008	0.041	1	Spinous-cell	DUSP9	DUSP9
ST8SIA2	0.000153164	-3.771	0.014	0.052	1	Spinous-cell	ST8SIA2	ST8SIA2
MIR203A	0.000154319	2.43292	0.052	0.012	1	Spinous-cell	MIR203A	MIR203A
SERP2	0.000154376	-3.64413	0.011	0.046	1	Spinous-cell	SERP2	SERP2
CBLC	0.000154662	0.795672	0.649	0.616	1	Spinous-cell	CBLC	CBLC
JPX	0.000155107	-0.51961	0.336	0.454	1	Spinous-cell	JPX	JPX
DUOX1	0.00015524	0.819318	0.791	0.761	1	Spinous-cell	DUOX1	DUOX1
CDH2	0.000158308	-4.57361	0.011	0.046	1	Spinous-cell	CDH2	CDH2
RAD21-AS1	0.000159426	-0.754868	0.072	0.139	1	Spinous-cell	RAD21-AS1	RAD21-AS1
LOC100505549	0.000164383	-0.867087	0.072	0.139	1	Spinous-cell	LOC100505549	LOC100505549
YBX3P1	0.000166657	0.729727	0.799	0.844	1	Spinous-cell	YBX3P1	YBX3P1
RP9P	0.000168194	-0.873661	0.158	0.245	1	Spinous-cell	RP9P	RP9P
PLCD3	0.00016894	-0.66396	0.19	0.278	1	Spinous-cell	PLCD3	PLCD3
DENND3	0.000169319	-0.659086	0.057	0.118	1	Spinous-cell	DENND3	DENND3
TFAP2C	0.000169987	0.544158	0.929	0.88	1	Spinous-cell	TFAP2C	TFAP2C
NCEH1	0.000170043	-1.41261	0.067	0.129	1	Spinous-cell	NCEH1	NCEH1
CDC25A	0.000170861	-1.39348	0.037	0.089	1	Spinous-cell	CDC25A	CDC25A
PLEKHO1	0.000171079	-1.08266	0.126	0.203	1	Spinous-cell	PLEKHO1	PLEKHO1
TIMM8B	0.000172821	0.604319	0.862	0.884	1	Spinous-cell	TIMM8B	TIMM8B
CEP78	0.000173886	0.905601	0.109	0.187	1	Spinous-cell	CEP78	CEP78
SLC20A2	0.000174836	-0.582025	0.529	0.612	1	Spinous-cell	SLC20A2	SLC20A2
USP51	0.000174947	-0.803562	0.018	0.06	1	Spinous-cell	USP51	USP51
TRIM59	0.000177885	-0.567063	0.268	0.365	1	Spinous-cell	TRIM59	TRIM59
SOX5	0.000177937	-0.521796	0.133	0.22	1	Spinous-cell	SOX5	SOX5
HLA-DPB1.7	0.000178553	-3.34056	0.299	0.398	1	Spinous-cell	HLA-DPB1.7	HLA-DPB1
TSPAN10	0.000179606	-2.96762	0.077	0.141	1	Spinous-cell	TSPAN10	TSPAN10
HMCN1	0.000179981	-1.23449	0.074	0.141	1	Spinous-cell	HMCN1	HMCN1
CLEC2A	0.000180772	1.33867	0.288	0.207	1	Spinous-cell	CLEC2A	CLEC2A
C11orf45	0.000181983	-0.607383	0.112	0.187	1	Spinous-cell	C11orf45	C11orf45
CTTNBP2	0.000181993	-3.51557	0.032	0.081	1	Spinous-cell	CTTNBP2	CTTNBP2
CDKN2B	0.000182843	0.862562	0.388	0.301	1	Spinous-cell	CDKN2B	CDKN2B
IL17RC	0.000184511	0.767143	0.561	0.486	1	Spinous-cell	IL17RC	IL17RC
HIST1H2BI	0.000188548	-1.73333	0.006	0.037	1	Spinous-cell	HIST1H2BI	HIST1H2BI
FAM72B	0.000188548	-1.71888	0.006	0.037	1	Spinous-cell	FAM72B	FAM72B
LOC374443	0.000188658	-0.763203	0.189	0.27	1	Spinous-cell	LOC374443	LOC374443
HMGCR	0.000189824	0.835801	0.653	0.568	1	Spinous-cell	HMGCR	HMGCR
TMEM8A	0.000190457	-1.27418	0.192	0.278	1	Spinous-cell	TMEM8A	TMEM8A
FZD3	0.000190482	-1.32398	0.204	0.292	1	Spinous-cell	FZD3	FZD3
CEP41	0.000190881	-0.620924	0.17	0.255	1	Spinous-cell	CEP41	CEP41
RPLP0P2	0.000193697	0.664622	0.868	0.882	1	Spinous-cell	RPLP0P2	RPLP0P2
C5orf56	0.00019716	-0.608924	0.113	0.193	1	Spinous-cell	C5orf56	C5orf56
EXOG	0.000197633	-0.830365	0.064	0.125	1	Spinous-cell	EXOG	EXOG
ZBTB21	0.000198122	-0.582969	0.259	0.359	1	Spinous-cell	ZBTB21	ZBTB21
SFXN2	0.000198815	-0.655093	0.129	0.205	1	Spinous-cell	SFXN2	SFXN2
PRODH.1	0.00019946	1.28052	0.523	0.465	1	Spinous-cell	PRODH.1	PRODH
C2orf48	0.00019956	-3.23589	0.015	0.054	1	Spinous-cell	C2orf48	C2orf48
NRIP3	0.00019981	-2.47069	0.051	0.108	1	Spinous-cell	NRIP3	NRIP3
NSMF	0.000200225	-1.13378	0.41	0.51	1	Spinous-cell	NSMF	NSMF
LOC101928525	0.000201267	0.687045	0.198	0.299	1	Spinous-cell	LOC101928525	LOC101928525
SPIN4	0.000204982	-1.01038	0.156	0.237	1	Spinous-cell	SPIN4	SPIN4
AMIGO2	0.000206604	-0.864196	0.1	0.172	1	Spinous-cell	AMIGO2	AMIGO2
UBOX5	0.000206638	-0.548753	0.227	0.311	1	Spinous-cell	UBOX5	UBOX5
CAPNS2	0.000208856	0.651756	0.853	0.82	1	Spinous-cell	CAPNS2	CAPNS2
TEX41	0.000210466	-6.74379	0.005	0.033	1	Spinous-cell	TEX41	TEX41
FIGN	0.000210511	-2.81336	0.064	0.124	1	Spinous-cell	FIGN	FIGN
ZSCAN22	0.000211216	-0.603131	0.124	0.201	1	Spinous-cell	ZSCAN22	ZSCAN22
NDNL2.1	0.000213839	-0.913693	0.215	0.305	1	Spinous-cell	NDNL2.1	NDNL2
CPA4	0.000213923	1.17553	0.408	0.33	1	Spinous-cell	CPA4	CPA4
RNA28S5.1	0.00021454	1.65861	0.822	0.803	1	Spinous-cell	RNA28S5.1	RNA28S5
OR7E156P	0.000215681	-1.88681	0.005	0.033	1	Spinous-cell	OR7E156P	OR7E156P
HIST1H2BM	0.000216366	-4.7892	0.021	0.064	1	Spinous-cell	HIST1H2BM	HIST1H2BM
ROR2	0.000216439	-0.638193	0.052	0.11	1	Spinous-cell	ROR2	ROR2
VPS41	0.000216806	0.522424	0.437	0.531	1	Spinous-cell	VPS41	VPS41
MIR378I	0.000217667	0.761364	0.005	0.033	1	Spinous-cell	MIR378I	MIR378I
SUSD5	0.000218379	-4.30735	0.012	0.048	1	Spinous-cell	SUSD5	SUSD5
DPP9-AS1	0.000219958	-0.822961	0.118	0.197	1	Spinous-cell	DPP9-AS1	DPP9-AS1
SMC5	0.000221814	0.549325	0.44	0.556	1	Spinous-cell	SMC5	SMC5
EFNA1	0.000221875	0.579398	0.922	0.903	1	Spinous-cell	EFNA1	EFNA1
RBBP8NL	0.000222145	2.67812	0.109	0.05	1	Spinous-cell	RBBP8NL	RBBP8NL
SDR9C7	0.000224053	3.28146	0.147	0.081	1	Spinous-cell	SDR9C7	SDR9C7
TNF.7	0.000226503	-1.15578	0.028	0.073	1	Spinous-cell	TNF.7	TNF
POU2F3	0.000226993	0.617288	0.656	0.581	1	Spinous-cell	POU2F3	POU2F3
NXPE3	0.00022895	-1.49106	0.117	0.191	1	Spinous-cell	NXPE3	NXPE3
CARD8	0.000229233	1.05814	0.212	0.303	1	Spinous-cell	CARD8	CARD8
PDE1B	0.000230479	-2.83402	0.046	0.1	1	Spinous-cell	PDE1B	PDE1B
RHOJ	0.000231156	-2.80073	0.028	0.073	1	Spinous-cell	RHOJ	RHOJ
CHAF1A	0.000231505	-0.560712	0.282	0.369	1	Spinous-cell	CHAF1A	CHAF1A
TMEM255B	0.000232062	-1.85421	0.005	0.033	1	Spinous-cell	TMEM255B	TMEM255B
LINC00473	0.000232225	-8.81343	0.002	0.025	1	Spinous-cell	LINC00473	LINC00473
MIR497HG	0.000232499	-0.715894	0.273	0.373	1	Spinous-cell	MIR497HG	MIR497HG
ELFN2	0.000235658	-2.37511	0.026	0.071	1	Spinous-cell	ELFN2	ELFN2
TMEM19	0.0002362	0.916055	0.738	0.691	1	Spinous-cell	TMEM19	TMEM19
HIST1H2BF	0.000237926	-1.85739	0.057	0.116	1	Spinous-cell	HIST1H2BF	HIST1H2BF
FXR2	0.000237961	-0.603822	0.316	0.411	1	Spinous-cell	FXR2	FXR2
CBS.2	0.000238193	-2.2939	0.002	0.025	1	Spinous-cell	CBS.2	CBS
PCBP1-AS1	0.000239712	-1.3747	0.121	0.199	1	Spinous-cell	PCBP1-AS1	PCBP1-AS1
ATP6V1B2	0.000240028	-0.520208	0.696	0.776	1	Spinous-cell	ATP6V1B2	ATP6V1B2
NOV	0.00024152	-2.31084	0.193	0.276	1	Spinous-cell	NOV	NOV
GYG2P1	0.000247176	-6.11223	0.008	0.039	1	Spinous-cell	GYG2P1	GYG2P1
PCNAP1	0.000248207	3.09056	0.067	0.131	1	Spinous-cell	PCNAP1	PCNAP1
CCDC184	0.000249199	-6.79628	0.008	0.039	1	Spinous-cell	CCDC184	CCDC184
IL33	0.000250202	0.85249	0.62	0.552	1	Spinous-cell	IL33	IL33
SH2B3	0.000251124	-1.66113	0.061	0.122	1	Spinous-cell	SH2B3	SH2B3
ACCSL	0.000252252	-4.21279	0.014	0.05	1	Spinous-cell	ACCSL	ACCSL
LOC101927164	0.000255222	2.28972	0.222	0.149	1	Spinous-cell	LOC101927164	LOC101927164
PAM	0.000256743	-0.672603	0.327	0.425	1	Spinous-cell	PAM	PAM
RPS26	0.000262238	0.923906	0.265	0.353	1	Spinous-cell	RPS26	RPS26
IGSF11	0.000263728	-3.63021	0.023	0.066	1	Spinous-cell	IGSF11	IGSF11
SPIRE2	0.000265431	-1.65765	0.044	0.098	1	Spinous-cell	SPIRE2	SPIRE2
TMEM121	0.000265691	-0.982192	0.011	0.044	1	Spinous-cell	TMEM121	TMEM121
LOC646471	0.000266981	-0.545009	0.202	0.292	1	Spinous-cell	LOC646471	LOC646471
RPS6KB2	0.000267283	0.614296	0.89	0.861	1	Spinous-cell	RPS6KB2	RPS6KB2
CLIC3	0.000268004	2.52732	0.287	0.21	1	Spinous-cell	CLIC3	CLIC3
ARHGAP23.1	0.000269311	0.683848	0.646	0.568	1	Spinous-cell	ARHGAP23.1	ARHGAP23
MIR6739	0.000272745	0.906479	0.055	0.114	1	Spinous-cell	MIR6739	MIR6739
DOCK2	0.000273421	-2.99783	0.04	0.091	1	Spinous-cell	DOCK2	DOCK2
BDKRB1	0.000273617	-0.551611	0.1	0.168	1	Spinous-cell	BDKRB1	BDKRB1
KCNJ2	0.000274547	-1.0558	0.463	0.527	1	Spinous-cell	KCNJ2	KCNJ2
CYP4V2	0.000275449	0.715479	0.152	0.237	1	Spinous-cell	CYP4V2	CYP4V2
LOC102724784	0.00027662	1.3071	0.051	0.108	1	Spinous-cell	LOC102724784	LOC102724784
ZNF512	0.000276698	-0.959772	0.227	0.311	1	Spinous-cell	ZNF512	ZNF512
TSTA3.1	0.00027782	0.605002	0.934	0.936	1	Spinous-cell	TSTA3.1	TSTA3
PAIP2B	0.000278148	1.8745	0.333	0.255	1	Spinous-cell	PAIP2B	PAIP2B
PLEKHO2	0.000279046	-1.6086	0.146	0.22	1	Spinous-cell	PLEKHO2	PLEKHO2
CLCN7	0.000280074	-0.688804	0.486	0.573	1	Spinous-cell	CLCN7	CLCN7
DOK2	0.000280351	-3.56508	0.014	0.05	1	Spinous-cell	DOK2	DOK2
TRDN	0.000281919	-3.70119	0.011	0.044	1	Spinous-cell	TRDN	TRDN
GPX7	0.000283663	-0.844232	0.173	0.253	1	Spinous-cell	GPX7	GPX7
RNF149	0.000284784	0.843898	0.77	0.759	1	Spinous-cell	RNF149	RNF149
KIAA1549L	0.000285126	-1.85774	0.129	0.201	1	Spinous-cell	KIAA1549L	KIAA1549L
C17orf75	0.000288208	0.923725	0.287	0.378	1	Spinous-cell	C17orf75	C17orf75
UEVLD	0.000289464	-0.544093	0.265	0.361	1	Spinous-cell	UEVLD	UEVLD
CHADL	0.000291529	-0.968741	0.132	0.208	1	Spinous-cell	CHADL	CHADL
KREMEN2	0.000293089	-0.916451	0.27	0.357	1	Spinous-cell	KREMEN2	KREMEN2
ZC3HC1	0.000295055	0.970356	0.288	0.392	1	Spinous-cell	ZC3HC1	ZC3HC1
LYPD6B	0.000297043	0.897815	0.569	0.483	1	Spinous-cell	LYPD6B	LYPD6B
HIST2H2AC	0.000297934	-0.828605	0.161	0.247	1	Spinous-cell	HIST2H2AC	HIST2H2AC
CD302	0.000300229	-1.92677	0.014	0.05	1	Spinous-cell	CD302	CD302
RAD51D	0.000301507	-1.03153	0.109	0.18	1	Spinous-cell	RAD51D	RAD51D
SLC9A8	0.000302204	1.15372	0.356	0.463	1	Spinous-cell	SLC9A8	SLC9A8
MGC16275	0.00030336	-0.607538	0.161	0.241	1	Spinous-cell	MGC16275	MGC16275
IL36RN	0.000306925	2.51422	0.17	0.102	1	Spinous-cell	IL36RN	IL36RN
GMDS-AS1	0.00030804	-1.84515	0.025	0.068	1	Spinous-cell	GMDS-AS1	GMDS-AS1
GTF2IRD2	0.00031003	-0.555403	0.144	0.226	1	Spinous-cell	GTF2IRD2	GTF2IRD2
CDC14B	0.000310091	-1.11729	0.115	0.189	1	Spinous-cell	CDC14B	CDC14B
DHDH	0.0003106	1.24011	0.018	0.058	1	Spinous-cell	DHDH	DHDH
SCARF2	0.000310976	-1.62238	0.025	0.068	1	Spinous-cell	SCARF2	SCARF2
ARHGEF18	0.000314646	-0.562274	0.365	0.45	1	Spinous-cell	ARHGEF18	ARHGEF18
SEZ6L2	0.000323387	0.83179	0.199	0.286	1	Spinous-cell	SEZ6L2	SEZ6L2
GLTSCR2	0.000328063	0.567131	0.98	0.988	1	Spinous-cell	GLTSCR2	GLTSCR2
SCNN1B	0.000329205	2.15984	0.218	0.145	1	Spinous-cell	SCNN1B	SCNN1B
XPO4	0.000329285	0.726328	0.299	0.409	1	Spinous-cell	XPO4	XPO4
TXNRD2	0.00032992	0.984245	0.253	0.344	1	Spinous-cell	TXNRD2	TXNRD2
WSCD1	0.000333654	-3.29017	0.035	0.083	1	Spinous-cell	WSCD1	WSCD1
FOXD2-AS1	0.000334002	-5.95767	0.006	0.035	1	Spinous-cell	FOXD2-AS1	FOXD2-AS1
SPRR1B	0.000337207	3.49312	0.684	0.653	1	Spinous-cell	SPRR1B	SPRR1B
P2RX5-TAX1BP3	0.000339652	1.15765	0.322	0.434	1	Spinous-cell	P2RX5-TAX1BP3	P2RX5-TAX1BP3
PAPOLB	0.000344089	-0.694202	0.336	0.436	1	Spinous-cell	PAPOLB	PAPOLB
SAMHD1	0.00034697	-1.09472	0.109	0.181	1	Spinous-cell	SAMHD1	SAMHD1
HEG1	0.000347065	1.06421	0.112	0.185	1	Spinous-cell	HEG1	HEG1
SORCS1	0.000348555	-0.777773	0.028	0.071	1	Spinous-cell	SORCS1	SORCS1
FARP2	0.000349314	-0.772091	0.302	0.39	1	Spinous-cell	FARP2	FARP2
TOM1L2	0.000350906	0.943241	0.706	0.662	1	Spinous-cell	TOM1L2	TOM1L2
HIST1H2AG	0.000351695	-4.35674	0.029	0.073	1	Spinous-cell	HIST1H2AG	HIST1H2AG
PPTC7	0.000353488	-0.693053	0.252	0.338	1	Spinous-cell	PPTC7	PPTC7
PROS1	0.000353549	1.04802	0.528	0.442	1	Spinous-cell	PROS1	PROS1
MIR6780B	0.000357494	-0.815657	0.006	0.035	1	Spinous-cell	MIR6780B	MIR6780B
NME7	0.000358161	0.699913	0.227	0.315	1	Spinous-cell	NME7	NME7
STK32C	0.000359292	-1.9981	0.043	0.095	1	Spinous-cell	STK32C	STK32C
TMEM45A	0.000359639	1.52741	0.844	0.838	1	Spinous-cell	TMEM45A	TMEM45A
ZNF570	0.000360725	-0.771041	0.032	0.079	1	Spinous-cell	ZNF570	ZNF570
FAM124A	0.000363809	-1.49269	0.029	0.073	1	Spinous-cell	FAM124A	FAM124A
[truncated: 11,652 more rows]

## Sheet: Table S7.2
Table S7.2 GO enrichment analysis of RNA marker genes in basal cells.
ID	Description	GeneRatio	BgRatio	pvalue	p.adjust	qvalue	geneID	Count	CellType
GO:0008544	epidermis development	79/1229	385/18870	2.9521e-20	1.62277e-16	1.31974e-16	COL17A1/LAMB3/JAG2/LAMA3/KRT15/COL7A1/KRT14/DLL1/TP63/FGFR2/KRT1/PDGFA/KRT5/KRT31/KRTDAP/LAMA5/KRT10/WNT10A/ZNF750/LAMC2/DSP/HES1/KRT27/KLK5/NTF4/KRT36/MET/ALOX15B/CALML5/TXNIP/PPP3CA/HOXA7/VDR/ST14/FOXN1/GRHL3/FERMT1/KRT80/NGFR/SULT2B1/IFT172/GRHL1/CRABP2/EXPH5/ERRFI1/WNT16/TRIM16/CDKN1A/KRT25/SLITRK6/BMP4/CASP14/FZD6/PLOD3/DCT/CERS3/IL20/GLI2/CLDN1/FABP5/ETV4/SLC39A2/SCEL/KRT77/ASAH1/CYSRT1/KRT…	79	Basal-cell
GO:0043588	skin development	65/1229	317/18870	7.38074e-17	2.0286e-13	1.64979e-13	ITGB4/ITGA3/KRT14/DLL1/TP63/FGFR2/KRT1/PDGFA/KRT5/LAMA5/ITGA2/KRT10/WNT10A/ITGA6/DSP/KRT27/COL5A1/KLK5/KRT36/MET/ALOX15B/TXNIP/PPP3CA/HOXA7/VDR/COL5A2/ST14/FOXN1/GRHL3/FERMT1/DACT2/KRT80/NGFR/GRHL1/EXPH5/ERRFI1/WNT16/DHCR24/TRIM16/CDKN1A/KRT25/CASP14/FZD6/CERS3/IL20/GLI2/CLDN1/ETV4/SLC27A4/SLC39A2/SCEL/KRT77/ASAH1/CYSRT1/KRT2/SOSTDC1/KRT73/TMEM79/CSTA/FST/SOX9/SPRR2E/COL1A2/CLDN4/DLX3	65	Basal-cell
GO:0031589	cell-substrate adhesion	59/1229	356/18870	2.77194e-11	5.07911e-08	4.13067e-08	COL17A1/ITGB4/CDH13/ITGA3/ANTXR1/FLNA/POSTN/ITGB1/LAMA5/ITGA2/PDPN/AJUBA/ITGA6/LYPD3/COL16A1/BCAM/VWA2/SMAD3/WNT4/DDR1/HOXA7/TRIP6/ZYX/GAS6/PTPRK/PHLDB2/ITGB8/FERMT1/EMP2/RRAS/ACTN1/THBS1/SGCE/CX3CL1/EPDR1/LAMC1/PREX1/DLC1/L1CAM/ABI3BP/APOD/PKP2/FERMT3/DMTN/NPNT/LYVE1/FBLN2/LIMS2/CD36/LPXN/SRGAP2/STON1/KIF14/EDIL3/STRC/FMN1/PKHD1/FZD4/FN1	59	Basal-cell
GO:0007264	small GTPase mediated signal transduction	71/1229	491/18870	1.76542e-10	2.42613e-07	1.97309e-07	CDH13/ITGA3/CTNNAL1/TAX1BP3/ITGB1/PDPN/RHOV/APOE/GPSM2/ABCA1/RGL2/MET/RAPGEF1/AUTS2/SPRY1/LPAR6/CELSR1/NGEF/ARAP1/ARHGEF10/SDCBP/CDON/VAV2/RRAS/NGFR/CDC42EP4/RAB30/KITLG/DHCR24/PLD1/ARHGEF5/ARHGAP29/CDKN1A/NET1/RASGEF1B/ITSN1/RALGPS2/ARHGEF28/PREX1/DLC1/SIPA1L3/KCTD10/ROPN1B/NOTCH2/ARHGAP30/ARHGEF10L/ARHGAP4/ARHGAP22/RND3/STMN3/CHN2/CYTH3/PSD3/FGD2/ARHGDIB/FAM13B/RAPGEFL1/FOXM1/NUCB2/IQGAP3/RHOT1…	71	Basal-cell
GO:0007160	cell-matrix adhesion	43/1229	239/18870	1.04402e-09	1.14779e-06	9.33461e-07	COL17A1/ITGB4/CDH13/ITGA3/POSTN/ITGB1/ITGA2/AJUBA/ITGA6/LYPD3/COL16A1/BCAM/VWA2/SMAD3/WNT4/DDR1/HOXA7/TRIP6/ZYX/PTPRK/PHLDB2/ITGB8/FERMT1/EMP2/RRAS/ACTN1/THBS1/SGCE/CX3CL1/EPDR1/DLC1/L1CAM/APOD/FERMT3/DMTN/NPNT/LYVE1/CD36/STON1/STRC/FMN1/PKHD1/FN1	43	Basal-cell
GO:0051962	positive regulation of nervous system development	48/1229	290/18870	2.05906e-09	1.69743e-06	1.38046e-06	WNT3/THBS2/CLSTN1/ITGB1/TP73/WNT3A/DLG5/NPTN/WNT7A/HES1/TGFB1/NTRK2/SLC7A5/SERPINF1/SMARCD3/ETV5/IL1RAP/TPBG/CDON/PLXNC1/BMP2/IL34/CRABP2/TENM4/RUFY3/MAP1B/PLXND1/CX3CL1/HIF1A/SLITRK6/BCAN/DCT/SOX10/KIT/BIN1/TRPV2/L1CAM/CLCN2/IL33/WDR62/LRP2/MYB/SLITRK2/HAPLN3/CAMK2B/MAPT/FZD4/FN1	48	Basal-cell
GO:0009913	epidermal cell differentiation	43/1229	245/18870	2.29951e-09	1.69743e-06	1.38046e-06	JAG2/KRT14/DLL1/TP63/KRT1/KRT5/KRT10/DSP/HES1/KLK5/KRT36/ALOX15B/TXNIP/PPP3CA/HOXA7/VDR/ST14/FOXN1/KRT80/SULT2B1/GRHL1/EXPH5/ERRFI1/WNT16/TRIM16/CDKN1A/SLITRK6/BMP4/CASP14/CERS3/IL20/ETV4/SLC39A2/SCEL/KRT77/ASAH1/KRT2/KRT73/TMEM79/CSTA/SPRR2E/STRC/DLX3	43	Basal-cell
GO:0030198	extracellular matrix organization	51/1229	321/18870	2.7696e-09	1.69743e-06	1.38046e-06	COL17A1/MATN2/COL7A1/ANTXR1/PHLDB1/SERPINH1/POSTN/SMOC2/ITGB1/COL18A1/PDPN/TGFBI/WNT3A/CAV2/COL16A1/COL4A6/COL4A5/SMAD3/APP/CST3/TGFB1/COL5A1/KLK5/DDR1/THSD4/COL5A2/GAS6/COL12A1/PHLDB2/FERMT1/BMP2/TMPRSS6/ADAMTSL3/MMP28/MIA/LAMC1/P4HA1/PLOD3/ADAMTS1/ABI3BP/MMP2/COL4A1/NPNT/SCX/AEBP1/ADAMTS5/SOX9/TLL1/COL1A2/HMCN1/ADAMTS4	51	Basal-cell
GO:0030216	keratinocyte differentiation	35/1229	177/18870	2.9041e-09	1.69743e-06	1.38046e-06	KRT14/TP63/KRT1/KRT5/KRT10/DSP/KLK5/KRT36/ALOX15B/TXNIP/PPP3CA/HOXA7/VDR/ST14/FOXN1/KRT80/GRHL1/EXPH5/ERRFI1/WNT16/TRIM16/CDKN1A/CASP14/CERS3/IL20/ETV4/SLC39A2/SCEL/KRT77/ASAH1/KRT2/KRT73/TMEM79/CSTA/SPRR2E	35	Basal-cell
GO:0043062	extracellular structure organization	51/1229	322/18870	3.08792e-09	1.69743e-06	1.38046e-06	COL17A1/MATN2/COL7A1/ANTXR1/PHLDB1/SERPINH1/POSTN/SMOC2/ITGB1/COL18A1/PDPN/TGFBI/WNT3A/CAV2/COL16A1/COL4A6/COL4A5/SMAD3/APP/CST3/TGFB1/COL5A1/KLK5/DDR1/THSD4/COL5A2/GAS6/COL12A1/PHLDB2/FERMT1/BMP2/TMPRSS6/ADAMTSL3/MMP28/MIA/LAMC1/P4HA1/PLOD3/ADAMTS1/ABI3BP/MMP2/COL4A1/NPNT/SCX/AEBP1/ADAMTS5/SOX9/TLL1/COL1A2/HMCN1/ADAMTS4	51	Basal-cell
GO:0045229	external encapsulating structure organization	51/1229	323/18870	3.44082e-09	1.71947e-06	1.39839e-06	COL17A1/MATN2/COL7A1/ANTXR1/PHLDB1/SERPINH1/POSTN/SMOC2/ITGB1/COL18A1/PDPN/TGFBI/WNT3A/CAV2/COL16A1/COL4A6/COL4A5/SMAD3/APP/CST3/TGFB1/COL5A1/KLK5/DDR1/THSD4/COL5A2/GAS6/COL12A1/PHLDB2/FERMT1/BMP2/TMPRSS6/ADAMTSL3/MMP28/MIA/LAMC1/P4HA1/PLOD3/ADAMTS1/ABI3BP/MMP2/COL4A1/NPNT/SCX/AEBP1/ADAMTS5/SOX9/TLL1/COL1A2/HMCN1/ADAMTS4	51	Basal-cell
GO:0001667	ameboidal-type cell migration	68/1229	497/18870	4.52159e-09	2.07127e-06	1.68449e-06	ITGB4/CDH13/ITGA3/PDLIM1/SMOC2/ITGB1/LAMA5/ITGA2/GPX1/DCN/MIR205/SNAI2/APOE/TIMP1/S100A2/WNT7A/GLUL/TGFB1/MET/ADIPOR1/EFNB1/SERPINF1/EDN1/GPC3/TPBG/FERMT1/GDNF/ANXA3/EMP2/RRAS/THBS1/EDNRA/EDN2/SPRED1/PTPRM/KITLG/RAB25/LRP5/PLXND1/PRSS3/CARD10/HIF1A/BMP4/ZEB2/ENPP2/MEF2C/GLIPR2/AKAP12/LRG1/SOX10/KIT/EVL/EDNRB/BAG4/ANLN/ARHGAP4/DMTN/ARHGDIB/KRT2/VSTM4/LPXN/ANXA6/SOX9/SRGAP2/PIK3CG/MMRN2/FN1/MARVELD3	68	Basal-cell
GO:0030318	melanocyte differentiation	12/1229	25/18870	1.29861e-08	5.49114e-06	4.46576e-06	MITF/OCA2/KITLG/SLC24A5/ZEB2/MEF2C/RAB27A/SOX10/KIT/EDNRB/TYRP1/OR51E2	12	Basal-cell
GO:0007265	Ras protein signal transduction	51/1229	341/18870	2.19393e-08	8.61431e-06	7.00573e-06	CDH13/ITGA3/CTNNAL1/TAX1BP3/ITGB1/PDPN/RHOV/APOE/GPSM2/ABCA1/RGL2/MET/RAPGEF1/AUTS2/SPRY1/LPAR6/CELSR1/SDCBP/RRAS/NGFR/CDC42EP4/RAB30/KITLG/DHCR24/PLD1/ARHGAP29/CDKN1A/NET1/RASGEF1B/RALGPS2/ARHGEF28/DLC1/KCTD10/ROPN1B/NOTCH2/ARHGAP4/STMN3/CYTH3/PSD3/ARHGDIB/RAPGEFL1/FOXM1/IQGAP3/RGL3/KIF14/COL1A2/PIK3CG/EPS8L1/KSR1/ELMO1/DOK1	51	Basal-cell
GO:0045109	intermediate filament organization	20/1229	73/18870	2.50822e-08	9.1217e-06	7.41837e-06	KRT15/KRT14/KRT1/KRT5/KRT31/KRT10/PKP1/DSP/KRT27/KRT36/KRT35/KRT80/VIM/KRT25/PKP2/KRT33B/KRT77/KRT2/KRT73/KRT32	20	Basal-cell
GO:0051960	regulation of nervous system development	63/1229	466/18870	2.65503e-08	9.1217e-06	7.41837e-06	WNT3/THBS2/DLL1/CLSTN1/ITGB1/ASCL2/TP73/WNT3A/DLG5/NPTN/WNT7A/HES1/TGFB1/NTRK2/SLC7A5/SERPINF1/PPP3CA/SMARCD3/ETV5/IL1RAP/RGMA/TPBG/CDON/PLXNC1/BMP2/NR1D1/IL34/TMEM98/CRABP2/TENM4/RUFY3/MAP1B/HES2/SORL1/PLXND1/CX3CL1/HIF1A/SLITRK6/TREM2/BCAN/DCT/SOX10/BRINP1/KIT/TNFRSF21/BIN1/TRPV2/L1CAM/ARHGAP4/CLCN2/IL33/WDR62/HEY1/LRP2/MYB/BMPR1A/SLITRK2/KIF14/HAPLN3/CAMK2B/MAPT/FZD4/FN1	63	Basal-cell
GO:0034329	cell junction assembly	61/1229	446/18870	2.87936e-08	9.3105e-06	7.57192e-06	COL17A1/DST/ITGB4/CDH13/THBS2/LAMA3/CLSTN1/ITGA2/AJUBA/SNAI2/ITGA6/WNT3A/COL16A1/PKP1/DLG5/NPTN/SMAD3/WNT7A/APP/WNT4/NTRK2/RAPGEF1/HOPX/TRIP6/PTPRK/IL1RAP/PHLDB2/SPTBN2/TPBG/CDH22/SDCBP/DSG1/ACTN1/THBS1/MAP1B/NLGN4Y/PLXND1/CLDN8/LAMC1/CDH8/FBF1/SLITRK6/MEF2C/DLC1/TJP1/CLDN1/APOD/NLGN4X/PKP2/SDK2/DMTN/POF1B/SLITRK2/SRGAP2/STON1/GJB1/FMN1/PCDHB5/FN1/CLDN4/MARVELD3	61	Basal-cell
GO:0042063	gliogenesis	50/1229	338/18870	4.30973e-08	1.31614e-05	1.07038e-05	ITGB4/DLL1/ASCL2/NFIB/TP73/CCL2/APP/HES1/TGFB1/NTRK2/SLC7A5/ETV5/IFNGR1/ARHGEF10/ANO1/BMP2/NR1D1/RRAS/VIM/IL34/TMEM98/TUBA1A/TENM4/ROR2/CX3CL1/AREG/ZEB2/TREM2/ERBB3/BCAN/SLC45A3/SOX10/TNFRSF21/BIN1/CNTN1/SYNE2/CLCN2/IL33/B4GALT6/MAL/LRP2/MYB/CDK1/PLP1/SOX9/SRGAP2/HAPLN3/CDKN2C/MAPT/TSPAN2	50	Basal-cell
GO:0050769	positive regulation of neurogenesis	40/1229	242/18870	4.67169e-08	1.35159e-05	1.09921e-05	WNT3/ITGB1/TP73/WNT3A/NPTN/HES1/TGFB1/NTRK2/SLC7A5/SERPINF1/SMARCD3/ETV5/CDON/PLXNC1/BMP2/IL34/CRABP2/TENM4/RUFY3/MAP1B/PLXND1/CX3CL1/HIF1A/BCAN/DCT/SOX10/KIT/BIN1/TRPV2/L1CAM/CLCN2/IL33/WDR62/LRP2/MYB/HAPLN3/CAMK2B/MAPT/FZD4/FN1	40	Basal-cell
GO:0048762	mesenchymal cell differentiation	42/1229	262/18870	5.32155e-08	1.44284e-05	1.17341e-05	FLNA/PHLDB1/FGFR2/LAMA5/PDPN/WNT10A/NRG1/SNAI2/ZNF750/DLG5/SMAD3/SPRED2/HES1/WNT4/TGFB1/ADIPOR1/EFNB1/SPRY1/EDN1/PHLDB2/GDNF/SDCBP/BMP2/MARK1/EMP2/EDNRA/SPRED1/KITLG/WNT16/ALX1/HIF1A/BMP4/MEF2C/GLIPR2/LRG1/SOX10/EDNRB/HEY1/BMPR1A/ANXA6/SOX9/FN1	42	Basal-cell
GO:0048066	developmental pigmentation	16/1229	50/18870	5.67046e-08	1.44284e-05	1.17341e-05	MITF/OCA2/EDNRA/KITLG/SLC24A5/ZEB2/MEF2C/RAB27A/DCT/SOX10/KIT/EDNRB/TYR/GPR143/TYRP1/OR51E2	16	Basal-cell
GO:0042060	wound healing	58/1229	423/18870	5.77451e-08	1.44284e-05	1.17341e-05	DST/FLNA/SMOC2/KRT1/PDGFA/ITGB1/ITGA2/PDPN/NRG1/GPX1/AJUBA/WNT3A/APOE/TIMP1/MYL9/SMAD3/WNT7A/TSKU/DSP/WNT4/TGFB1/COL5A1/DDR1/CD151/PPP3CA/PTK7/EDN1/GAS6/PROS1/CNN2/PHLDB2/GRHL3/FERMT1/SERPING1/VAV2/GNAQ/THBS1/TNFRSF12A/PROCR/CDKN1A/CX3CL1/HIF1A/FZD6/ERBB3/RAB27A/LRG1/CLDN1/SAA1/NOTCH2/FERMT3/DMTN/VKORC1/CD36/SYT7/ANXA6/PIK3CG/FN1/CLDN4	58	Basal-cell
GO:0060485	mesenchyme development	48/1229	327/18870	1.01868e-07	2.43465e-05	1.98002e-05	FLNA/PHLDB1/FGFR2/LAMA5/PDPN/WNT10A/NRG1/SNAI2/WNT3A/ZNF750/DLG5/SMAD3/SPRED2/HES1/WNT4/TGFB1/ADIPOR1/EFNB1/SPRY1/PTK7/EDN1/PHLDB2/GDNF/SDCBP/BMP2/MARK1/EMP2/EDNRA/SPRED1/KITLG/WNT16/ALX1/HIF1A/BMP4/MEF2C/ERBB3/GLIPR2/LRG1/SOX10/EDNRB/HEY1/SCX/BMPR1A/ANXA6/ADAMTS5/SOX9/ZFPM2/FN1	48	Basal-cell
GO:0045104	intermediate filament cytoskeleton organization	22/1229	94/18870	1.13489e-07	2.59937e-05	2.11398e-05	DST/KRT15/KRT14/KRT1/KRT5/KRT31/KRT10/PKP1/DSP/KRT27/KRT36/KRT35/KRT80/VIM/KRT25/ARHGEF28/PKP2/KRT33B/KRT77/KRT2/KRT73/KRT32	22	Basal-cell
GO:0050767	regulation of neurogenesis	54/1229	390/18870	1.1955e-07	2.62867e-05	2.13781e-05	WNT3/DLL1/ITGB1/ASCL2/TP73/WNT3A/NPTN/WNT7A/HES1/TGFB1/NTRK2/SLC7A5/SERPINF1/PPP3CA/SMARCD3/ETV5/RGMA/CDON/PLXNC1/BMP2/NR1D1/IL34/TMEM98/CRABP2/TENM4/RUFY3/MAP1B/HES2/SORL1/PLXND1/CX3CL1/HIF1A/TREM2/BCAN/DCT/SOX10/BRINP1/KIT/BIN1/TRPV2/L1CAM/ARHGAP4/CLCN2/IL33/WDR62/HEY1/LRP2/MYB/BMPR1A/HAPLN3/CAMK2B/MAPT/FZD4/FN1	54	Basal-cell
GO:0007044	cell-substrate junction assembly	22/1229	95/18870	1.3871e-07	2.82402e-05	2.29668e-05	COL17A1/DST/ITGB4/LAMA3/ITGA2/AJUBA/ITGA6/COL16A1/SMAD3/WNT4/TRIP6/PTPRK/PHLDB2/ACTN1/THBS1/LAMC1/DLC1/APOD/DMTN/STON1/FMN1/FN1	22	Basal-cell
GO:0045103	intermediate filament-based process	22/1229	95/18870	1.3871e-07	2.82402e-05	2.29668e-05	DST/KRT15/KRT14/KRT1/KRT5/KRT31/KRT10/PKP1/DSP/KRT27/KRT36/KRT35/KRT80/VIM/KRT25/ARHGEF28/PKP2/KRT33B/KRT77/KRT2/KRT73/KRT32	22	Basal-cell
GO:0010720	positive regulation of cell development	58/1229	444/18870	3.0879e-07	6.06221e-05	4.9302e-05	WNT3/ITGB1/SOX12/TP73/WNT3A/NPTN/HES1/TGFB1/NTRK2/SLC7A5/SERPINF1/PPP3CA/SMARCD3/ETV5/GAS6/RUNX3/CDON/PLXNC1/BMP2/IL34/KITLG/CRABP2/TENM4/RUFY3/MAP1B/ROR2/PLXND1/CX3CL1/PTPRC/HIF1A/BMP4/VNN1/TREM2/BCAN/DCT/SOX10/KIT/BIN1/IL20/TRPV2/GLI2/NOTCH2/L1CAM/HCLS1/CLCN2/IL33/HLA-DRA/WDR62/LRP2/MYB/PIK3R6/HAPLN3/TYROBP/CD83/CAMK2B/MAPT/FZD4/FN1	58	Basal-cell
GO:0002062	chondrocyte differentiation	24/1229	116/18870	3.62725e-07	6.87552e-05	5.59163e-05	EFEMP1/SERPINH1/TGFBI/SNAI2/NFIB/SLC39A14/SMAD3/WNT7A/TSKU/TGFB1/RUNX3/BMP2/WNT5B/HIF1A/BMP4/MEF2C/EXT2/ARID5A/SCX/CYTL1/SCIN/BMPR1A/ANXA6/SOX9	24	Basal-cell
GO:0010001	glial cell differentiation	39/1229	252/18870	4.03367e-07	7.3321e-05	5.96295e-05	ITGB4/DLL1/NFIB/TP73/APP/HES1/TGFB1/NTRK2/IFNGR1/ARHGEF10/ANO1/BMP2/NR1D1/VIM/IL34/TMEM98/TUBA1A/TENM4/ROR2/ZEB2/TREM2/ERBB3/BCAN/SLC45A3/SOX10/TNFRSF21/BIN1/CNTN1/CLCN2/IL33/B4GALT6/MAL/CDK1/PLP1/SOX9/HAPLN3/CDKN2C/MAPT/TSPAN2	39	Basal-cell
GO:0002064	epithelial cell development	35/1229	214/18870	4.13489e-07	7.3321e-05	5.96295e-05	FLNA/DLL1/TP63/COL18A1/GPX1/CCM2/WNT7A/MET/RAPGEF1/FAT1/GSTM3/ST14/EPAS1/DACT2/VIM/WNT5B/EDNRA/RAB25/EXPH5/CDKN1A/HIF1A/BMP4/PLOD3/TJP1/SIPA1L3/EDNRB/TMOD1/CLDN1/NOTCH2/KRT2/TMEM79/POF1B/SOX9/PKHD1/S1PR3	35	Basal-cell
GO:0071559	response to transforming growth factor beta	43/1229	293/18870	4.69543e-07	8.06587e-05	6.5597e-05	ITGA3/DKK3/POSTN/ZFP36L2/FGFR2/HTRA1/WNT10A/MXRA5/LTBP4/LTBP2/CAV2/ASPN/SMAD3/WNT7A/SPRED2/WNT4/TGFB1/SPRY1/EDN1/ZYX/PTPRK/RUNX3/ITGB8/FERMT1/SDCBP/BMP2/THBS1/SPRED1/HPGD/ZEB2/MEF2C/WFIKKN2/VEPH1/LRG1/CLDN1/PMEPA1/NPNT/SCX/BMPR1A/LPXN/SOX9/COL1A2/FYN	43	Basal-cell
GO:0060562	epithelial tube morphogenesis	47/1229	334/18870	4.87591e-07	8.12209e-05	6.60543e-05	DLL1/FGFR2/LAMA5/WNT3A/DLG5/CCM2/SMAD3/HES1/WNT4/TGFB1/DDR1/MET/TNC/SPRY1/PTK7/CELSR1/EDN1/VDR/ST14/GRHL3/GPC3/RGMA/GDNF/BMP2/NRARP/IFT172/EDNRA/LRP5/PLXND1/AREG/HIF1A/BMP4/FZD6/MEF2C/DLC1/GLI2/NOTCH2/COL4A1/SOSTDC1/NPNT/LRP2/KIF20B/SOX9/WNT9B/FMN1/MMRN2/PKHD1	47	Basal-cell
GO:0150115	cell-substrate junction organization	22/1229	102/18870	5.19873e-07	8.40512e-05	6.8356e-05	COL17A1/DST/ITGB4/LAMA3/ITGA2/AJUBA/ITGA6/COL16A1/SMAD3/WNT4/TRIP6/PTPRK/PHLDB2/ACTN1/THBS1/LAMC1/DLC1/APOD/DMTN/STON1/FMN1/FN1	22	Basal-cell
GO:0010232	vascular transport	20/1229	87/18870	5.77537e-07	8.81867e-05	7.17193e-05	SLC38A5/SLC2A1/APOE/SLC1A3/SLC7A1/SLC7A5/SLC27A1/SLC1A5/ABCC3/SLC1A4/SLC6A1/LRP3/FABP5/SLC16A1/SLC1A2/SLC27A4/LRP2/CD36/ABCC2/SLC24A3	20	Basal-cell
GO:0150104	transport across blood-brain barrier	20/1229	87/18870	5.77537e-07	8.81867e-05	7.17193e-05	SLC38A5/SLC2A1/APOE/SLC1A3/SLC7A1/SLC7A5/SLC27A1/SLC1A5/ABCC3/SLC1A4/SLC6A1/LRP3/FABP5/SLC16A1/SLC1A2/SLC27A4/LRP2/CD36/ABCC2/SLC24A3	20	Basal-cell
GO:0048732	gland development	57/1229	443/18870	6.42931e-07	9.51354e-05	7.73705e-05	ASS1/WNT3/DKK3/TP63/FGFR2/PDGFA/LAMA5/ITGA2/WLS/WNT10A/NRG1/GPX1/SNAI2/NFIB/WNT3A/SMAD3/HES1/NCOR2/WNT4/TGFB1/DDR1/MET/ALOX15B/SLC7A5/TNC/SERPINF1/EDN1/VDR/FOXN1/HOXA9/BMP2/EDNRA/FPGS/LRP5/CACNB4/PLXND1/AREG/HIF1A/BMP4/SOX10/CSN2/GLI2/TYR/CLDN1/NOTCH2/UGT1A10/CCND1/CLCN2/MMP2/NKX2-8/SOSTDC1/BMPR1A/LIMS2/IQGAP3/SOX9/PSAP/SOCS2	57	Basal-cell
GO:0098773	skin epidermis development	25/1229	128/18870	6.57658e-07	9.51354e-05	7.73705e-05	DLL1/TP63/FGFR2/KRT1/PDGFA/LAMA5/WNT10A/KRT27/MET/FOXN1/GRHL3/FERMT1/NGFR/GRHL1/KRT25/FZD6/GLI2/CLDN1/CYSRT1/SOSTDC1/TMEM79/FST/SOX9/CLDN4/DLX3	25	Basal-cell
GO:0045682	regulation of epidermis development	17/1229	66/18870	7.28712e-07	0.000102711	8.35314e-05	DLL1/TP63/KRT10/HES1/KRT36/ALOX15B/HOXA7/VDR/SULT2B1/GRHL1/ERRFI1/TRIM16/BMP4/IL20/ETV4/KRT2/TMEM79	17	Basal-cell
GO:0003018	vascular process in circulatory system	40/1229	269/18870	8.30656e-07	0.000114153	9.28367e-05	SLC38A5/SLC2A1/GPX1/APOE/SLC1A3/SLC7A1/TGFB1/SLC7A5/EDN1/SLC27A1/BDKRB2/SLC1A5/ABCC3/ATP2B1/EDNRA/EDN2/SLC1A4/SLC6A1/ZEB2/PLOD3/EXT2/AKAP12/ADORA2B/TJP1/LRP3/EDNRB/SOD3/FABP5/SLC16A1/SLC1A2/SLC27A4/MMP2/LRP2/KAT2B/HRH1/VSTM4/CD36/UCN/ABCC2/SLC24A3	40	Basal-cell
GO:0032963	collagen metabolic process	22/1229	106/18870	1.04175e-06	0.000139671	0.00011359	SERPINH1/ITGB1/ITGA2/P3H2/CST3/WNT4/TGFB1/COL5A1/SERPINB7/TMPRSS6/MMP28/VIM/HIF1A/BMP4/PLOD3/MMP2/PEPD/SCX/MYB/LARP6/UCN/COL1A2	22	Basal-cell
GO:0050808	synapse organization	60/1229	483/18870	1.07555e-06	0.000140769	0.000114483	ITGA3/THBS2/FLNA/CLSTN1/ITGB1/PRNP/LAMA5/WNT3A/APOE/DLG5/NPTN/COL4A5/WNT7A/APP/NTRK2/TNC/KY/PTK7/IGSF9/NGEF/IL1RAP/SPTBN2/TPBG/GDNF/SDCBP/PLXNC1/ACTN1/TUBA1A/MAP1B/NLGN4Y/ROR2/CACNB4/PLXND1/SLC6A1/CX3CL1/CDH8/SLITRK6/MEF2C/TREM2/SORT1/BCAN/RPS6KA5/L1CAM/NLGN4X/CDC20/SDK2/ARHGAP22/COL4A1/CNKSR2/SYN1/SRGN/SYBU/TMEM108/SLITRK2/SRGAP2/SNCG/CAMK2B/MAPT/PCDHB5/FYN	60	Basal-cell
GO:0061138	morphogenesis of a branching epithelium	31/1229	187/18870	1.38874e-06	0.000177533	0.000144382	TP63/FGFR2/PDGFA/LAMA5/SNAI2/DLG5/WNT4/DDR1/MET/TNC/SPRY1/CELSR1/EDN1/VDR/ST14/GPC3/GDNF/BMP2/NRARP/EDNRA/LRP5/PLXND1/AREG/BMP4/SOX10/GLI2/COL4A1/NPNT/SOX9/WNT9B/PKHD1	31	Basal-cell
GO:0007369	gastrulation	32/1229	197/18870	1.49241e-06	0.00018645	0.000151634	ITGB4/LAMB3/ITGA3/WNT3/LAMA3/COL7A1/PHLDB1/FGFR2/ITGB1/ITGA2/WLS/WNT3A/SMAD3/TGIF2/COL5A1/UGDH/COL5A2/ETS2/COL12A1/PHLDB2/GPC3/SOX7/WNT5B/LRP5/TENM4/BMP4/EXT2/MMP2/SCX/BMPR1A/ETV2/FN1	32	Basal-cell
GO:0071634	regulation of transforming growth factor beta production	13/1229	42/18870	1.53407e-06	0.000187395	0.000152402	SMAD3/TSKU/LAPTM4B/SERPINB7/ITGB8/FERMT1/THBS1/CX3CL1/HIF1A/MYB/BMPR1A/TYROBP/FN1	13	Basal-cell
GO:0050931	pigment cell differentiation	12/1229	36/18870	1.59761e-06	0.000189946	0.000154476	MITF/OCA2/KITLG/SLC24A5/ZEB2/MEF2C/RAB27A/SOX10/KIT/EDNRB/TYRP1/OR51E2	12	Basal-cell
GO:0009410	response to xenobiotic stimulus	55/1229	434/18870	1.62406e-06	0.000189946	0.000154476	ASS1/ITGA3/PRNP/COL18A1/ITGA2/GPX1/ALDH3A1/TP73/CBR1/SLC1A3/ABCA1/PLIN2/XPC/GSTA4/TXNIP/TGIF1/EDN1/GSTM3/GAS6/FMO1/SLC6A2/ABCC3/CYP2S1/VAV2/GSTA3/GSTM1/GRIN2A/THBS1/CMBL/PTPRM/MAP1B/CDKN1A/ACSL1/DUSP6/MEF2C/CYP2U1/SOX10/UGT1A10/CCND1/SLC1A2/MMP2/CSAG3/VKORC1/NAT1/AHR/AOX1/CDK1/CARD9/NFATC2/CERS1/PRKCB/AGPAT2/ABCC2/NCEH1/BCHE	55	Basal-cell
GO:0071560	cellular response to transforming growth factor beta stimulus	41/1229	287/18870	1.74875e-06	0.000200268	0.000162871	ITGA3/DKK3/POSTN/ZFP36L2/FGFR2/HTRA1/WNT10A/LTBP4/LTBP2/CAV2/ASPN/SMAD3/WNT7A/SPRED2/WNT4/TGFB1/SPRY1/EDN1/ZYX/PTPRK/ITGB8/FERMT1/SDCBP/BMP2/THBS1/SPRED1/HPGD/ZEB2/MEF2C/WFIKKN2/VEPH1/LRG1/CLDN1/PMEPA1/NPNT/SCX/BMPR1A/LPXN/SOX9/COL1A2/FYN	41	Basal-cell
GO:0048730	epidermis morphogenesis	12/1229	37/18870	2.22484e-06	0.000249591	0.000202984	TP63/FGFR2/WNT10A/KRT27/NGFR/KRT25/PLOD3/GLI2/SOSTDC1/TMEM79/FST/DLX3	12	Basal-cell
GO:0001704	formation of primary germ layer	24/1229	128/18870	2.34316e-06	0.000257607	0.000209503	ITGB4/LAMB3/ITGA3/WNT3/LAMA3/COL7A1/FGFR2/ITGB1/ITGA2/WLS/WNT3A/SMAD3/COL5A1/COL5A2/ETS2/COL12A1/SOX7/BMP4/EXT2/MMP2/SCX/BMPR1A/ETV2/FN1	24	Basal-cell
GO:0032967	positive regulation of collagen biosynthetic process	10/1229	26/18870	2.68507e-06	0.000289408	0.000235366	ITGA2/WNT4/TGFB1/SERPINB7/VIM/BMP4/SCX/MYB/LARP6/UCN	10	Basal-cell
GO:0048864	stem cell development	19/1229	88/18870	3.01015e-06	0.000318208	0.000258788	LAMA5/NRG1/SNAI2/WNT7A/HES1/EFNB1/EDN1/GDNF/EDNRA/KITLG/PTPRC/HIF1A/BMP4/SOX10/EDNRB/BMPR1A/ANXA6/SOX9/FN1	19	Basal-cell
GO:0051056	regulation of small GTPase mediated signal transduction	41/1229	295/18870	3.53978e-06	0.000367135	0.000298579	ITGA3/ITGB1/APOE/ABCA1/RGL2/MET/AUTS2/SPRY1/LPAR6/NGEF/ARAP1/ARHGEF10/CDON/VAV2/KITLG/ARHGEF5/ARHGAP29/NET1/ITSN1/ARHGEF28/PREX1/DLC1/SIPA1L3/KCTD10/NOTCH2/ARHGAP30/ARHGEF10L/ARHGAP4/ARHGAP22/STMN3/CHN2/CYTH3/PSD3/FGD2/ARHGDIB/FAM13B/FOXM1/SRGAP2/KIF14/PIK3CG/EPS8L1	41	Basal-cell
GO:0071604	transforming growth factor beta production	13/1229	45/18870	3.65329e-06	0.000370075	0.00030097	SMAD3/TSKU/LAPTM4B/SERPINB7/ITGB8/FERMT1/THBS1/CX3CL1/HIF1A/MYB/BMPR1A/TYROBP/FN1	13	Basal-cell
GO:0001654	eye development	50/1229	391/18870	3.70277e-06	0.000370075	0.00030097	EFEMP1/DLL1/FJX1/NFIB/SMAD3/WNT7A/TSKU/SPRED2/HES1/NTRK2/TGIF2/COL5A1/MYOM2/SERPINF1/SPRY1/FAT1/MITF/SMARCD3/COL5A2/GRHL3/LIMK2/RCN1/CDON/VIM/WNT5B/IFT172/SPRED1/PTPRM/LRP5/WNT16/HIF1A/SLITRK6/BMP4/LPCAT1/SIPA1L3/SIX5/SMG9/TMOD1/NOTCH2/CLCN2/SDK2/COL4A1/BIRC7/VSTM4/SOX9/WNT9B/MEIS2/CRYBB3/FZD4/HSF4	50	Basal-cell
GO:0043616	keratinocyte proliferation	15/1229	59/18870	3.88237e-06	0.000381097	0.000309933	CDH13/TP63/FGFR2/SNAI2/VDR/PTPRK/FERMT1/IFT172/WNT16/CDKN1A/AREG/LRG1/NOTCH2/KRT2/FST	15	Basal-cell
GO:0010714	positive regulation of collagen metabolic process	10/1229	27/18870	4.01598e-06	0.000387295	0.000314974	ITGA2/WNT4/TGFB1/SERPINB7/VIM/BMP4/SCX/MYB/LARP6/UCN	10	Basal-cell
GO:0001837	epithelial to mesenchymal transition	29/1229	178/18870	4.29223e-06	0.000399615	0.000324993	FLNA/PHLDB1/FGFR2/PDPN/SNAI2/ZNF750/DLG5/SMAD3/SPRED2/WNT4/TGFB1/ADIPOR1/SPRY1/EDN1/PHLDB2/SDCBP/BMP2/MARK1/EMP2/EDNRA/SPRED1/WNT16/ALX1/HIF1A/BMP4/GLIPR2/LRG1/HEY1/SOX9	29	Basal-cell
GO:0043473	pigmentation	22/1229	115/18870	4.33612e-06	0.000399615	0.000324993	SNAI2/APOE/MITF/OCA2/EDNRA/KITLG/MLPH/SLC24A5/ZEB2/MC1R/MEF2C/RAB27A/DCT/SOX10/KIT/EDNRB/TYR/PMEL/GPR143/TYRP1/KIF13A/OR51E2	22	Basal-cell
GO:0031069	hair follicle morphogenesis	11/1229	33/18870	4.36181e-06	0.000399615	0.000324993	TP63/FGFR2/WNT10A/KRT27/NGFR/KRT25/GLI2/SOSTDC1/TMEM79/FST/DLX3	11	Basal-cell
GO:0046942	carboxylic acid transport	46/1229	351/18870	4.66443e-06	0.000420334	0.000341843	SLC38A5/ITGB1/SLC2A1/SLCO2A1/SLC6A8/APOE/SLC1A3/PLIN2/SLC7A1/SLC27A6/NTRK2/SLC7A5/EDN1/SLC27A1/BDKRB2/SLC43A3/SLC43A1/SLC1A5/ABCC3/LRRC8D/SLC16A14/THBS1/SLC47A1/SLC25A38/CRABP2/LRP5/SLC1A4/EMB/CACNB4/SLC6A1/ACSL1/PLA2R1/SLC38A4/FABP5/SLC16A1/SLC1A2/SLC27A4/SLC16A5/CRABP1/CES1/LRP2/SLC26A6/SLC27A5/CD36/PSAP/ABCC2	46	Basal-cell
GO:0150063	visual system development	50/1229	395/18870	4.94509e-06	0.000438438	0.000356567	EFEMP1/DLL1/FJX1/NFIB/SMAD3/WNT7A/TSKU/SPRED2/HES1/NTRK2/TGIF2/COL5A1/MYOM2/SERPINF1/SPRY1/FAT1/MITF/SMARCD3/COL5A2/GRHL3/LIMK2/RCN1/CDON/VIM/WNT5B/IFT172/SPRED1/PTPRM/LRP5/WNT16/HIF1A/SLITRK6/BMP4/LPCAT1/SIPA1L3/SIX5/SMG9/TMOD1/NOTCH2/CLCN2/SDK2/COL4A1/BIRC7/VSTM4/SOX9/WNT9B/MEIS2/CRYBB3/FZD4/HSF4	50	Basal-cell
GO:0015849	organic acid transport	46/1229	352/18870	5.03543e-06	0.000439361	0.000357318	SLC38A5/ITGB1/SLC2A1/SLCO2A1/SLC6A8/APOE/SLC1A3/PLIN2/SLC7A1/SLC27A6/NTRK2/SLC7A5/EDN1/SLC27A1/BDKRB2/SLC43A3/SLC43A1/SLC1A5/ABCC3/LRRC8D/SLC16A14/THBS1/SLC47A1/SLC25A38/CRABP2/LRP5/SLC1A4/EMB/CACNB4/SLC6A1/ACSL1/PLA2R1/SLC38A4/FABP5/SLC16A1/SLC1A2/SLC27A4/SLC16A5/CRABP1/CES1/LRP2/SLC26A6/SLC27A5/CD36/PSAP/ABCC2	46	Basal-cell
GO:2000027	regulation of animal organ morphogenesis	23/1229	126/18870	6.04922e-06	0.000519571	0.00042255	PDGFA/WNT10A/SNAI2/WNT3A/WNT7A/WNT4/SPRY1/PTK7/CELSR1/EDN1/GRHL3/GPC3/GDNF/BMP2/NGFR/DAAM1/BMP4/FZD6/BMPR1A/SOX9/WNT9B/PRKCB/PKHD1	23	Basal-cell
GO:0043010	camera-type eye development	45/1229	344/18870	6.19226e-06	0.000523675	0.000425887	EFEMP1/DLL1/FJX1/NFIB/SMAD3/WNT7A/TSKU/SPRED2/HES1/NTRK2/TGIF2/MYOM2/SERPINF1/SPRY1/FAT1/MITF/SMARCD3/GRHL3/LIMK2/RCN1/CDON/VIM/WNT5B/IFT172/SPRED1/PTPRM/LRP5/WNT16/HIF1A/SLITRK6/BMP4/LPCAT1/SIX5/TMOD1/NOTCH2/CLCN2/SDK2/COL4A1/BIRC7/VSTM4/SOX9/WNT9B/CRYBB3/FZD4/HSF4	45	Basal-cell
GO:1901617	organic hydroxy compound biosynthetic process	36/1229	251/18870	6.70743e-06	0.000558647	0.000454329	MOXD1/DKK3/SNAI2/APOE/CYB5R1/WNT4/ALOX15B/LPCAT3/BMP2/OCA2/PCBD1/SRD5A3/NR1D1/FDFT1/ACER3/DHCR24/SLC24A5/ZEB2/MC1R/DCT/TYR/STAR/PMEL/CLCN2/PTAFR/ISYNA1/TYRP1/ASAH1/CES1/HMGCR/HRH1/SLC27A5/SREBF2/ACAA2/TM7SF2/OSBPL7	36	Basal-cell
GO:0030323	respiratory tube development	30/1229	192/18870	7.02082e-06	0.000576021	0.000468459	ITGA3/FGFR2/PDGFA/LAMA5/PDPN/NFIB/TP73/DLG5/HES1/TNC/SPRY1/PTK7/CELSR1/HOPX/EPAS1/GPC3/BMP2/EDN2/TRAF4/ERRFI1/BMP4/PLOD3/GLI2/CLCN2/RBBP9/NKX2-8/BMPR1A/HS6ST1/SOX9/ZFPM2	30	Basal-cell
GO:0098739	import across plasma membrane	32/1229	212/18870	7.38807e-06	0.000592848	0.000482144	ATP1B3/SLC38A5/ITGB1/PRNP/SLC12A4/SLC2A1/SLC39A14/SLC1A3/SLC7A1/KCNJ2/SLC7A5/PPP3CA/SLC2A5/SLC27A1/SLC43A1/SLC1A5/THBS1/SLC47A1/SCNN1A/SLC1A4/SLC6A1/KCNJ1/ACSL1/TRPV2/SLC38A4/SLC1A2/KCNJ13/LRP2/SLC27A5/CD36/TRPM1/FYN	32	Basal-cell
GO:0006631	fatty acid metabolic process	50/1229	401/18870	7.54946e-06	0.000592848	0.000482144	DBI/GPX1/PTGS1/ACSL4/CBR1/SLC27A6/ADIPOR1/ALOX15B/EDN1/SLC27A1/FMO1/CYP2S1/SCD/GSTM1/EDN2/HPGD/HACL1/CYP4B1/THEM5/ACSL1/ACOT7/SLC45A3/CYP2U1/HACD2/TECRL/FADS1/FABP5/SLC27A4/ACAD9/LPL/TYRP1/PHYH/ASAH1/CES1/KAT2B/SLC27A5/CD36/CRAT/PLP1/SOX9/FADS6/ELOVL6/ILVBL/ACAA2/FADS3/ALOX5AP/CYP4V2/LOC344967/ABHD3/BRCA1	50	Basal-cell
GO:0048880	sensory system development	50/1229	401/18870	7.54946e-06	0.000592848	0.000482144	EFEMP1/DLL1/FJX1/NFIB/SMAD3/WNT7A/TSKU/SPRED2/HES1/NTRK2/TGIF2/COL5A1/MYOM2/SERPINF1/SPRY1/FAT1/MITF/SMARCD3/COL5A2/GRHL3/LIMK2/RCN1/CDON/VIM/WNT5B/IFT172/SPRED1/PTPRM/LRP5/WNT16/HIF1A/SLITRK6/BMP4/LPCAT1/SIPA1L3/SIX5/SMG9/TMOD1/NOTCH2/CLCN2/SDK2/COL4A1/BIRC7/VSTM4/SOX9/WNT9B/MEIS2/CRYBB3/FZD4/HSF4	50	Basal-cell
GO:0007266	Rho protein signal transduction	24/1229	137/18870	7.99568e-06	0.000604239	0.000491407	CDH13/ITGA3/CTNNAL1/TAX1BP3/ITGB1/PDPN/RHOV/APOE/ABCA1/MET/LPAR6/CELSR1/NGFR/CDC42EP4/ARHGAP29/NET1/ARHGEF28/DLC1/KCTD10/ROPN1B/ARHGAP4/ARHGDIB/COL1A2/EPS8L1	24	Basal-cell
GO:0050673	epithelial cell proliferation	57/1229	480/18870	7.99658e-06	0.000604239	0.000491407	CDH13/TP63/FGFR2/LAMA5/GPX1/MIR205/SNAI2/NFIB/WNT3A/APOE/CAV2/CCL2/SMAD3/WNT7A/HES1/TGFB1/SERPINF1/VDR/PTPRK/RUNX3/GPC3/FERMT1/NR1D1/NGFR/SGPP2/NRARP/THBS1/IFT172/PTPRM/WNT16/IGFBP3/CDKN1A/LAMC1/AREG/HIF1A/BMP4/ZEB2/MEF2C/LRG1/KIT/EDNRB/CLDN1/NOTCH2/CCND1/NKX2-8/KRT2/CLEC12B/BMPR1A/LIMS2/VSTM4/IQGAP3/FST/SOX9/OR51E2/MMRN2/PKHD1/MARVELD3	57	Basal-cell
GO:0001763	morphogenesis of a branching structure	31/1229	203/18870	8.02427e-06	0.000604239	0.000491407	TP63/FGFR2/PDGFA/LAMA5/SNAI2/DLG5/WNT4/DDR1/MET/TNC/SPRY1/CELSR1/EDN1/VDR/ST14/GPC3/GDNF/BMP2/NRARP/EDNRA/LRP5/PLXND1/AREG/BMP4/SOX10/GLI2/COL4A1/NPNT/SOX9/WNT9B/PKHD1	31	Basal-cell
GO:0048754	branching morphogenesis of an epithelial tube	26/1229	156/18870	8.70195e-06	0.000646414	0.000525707	FGFR2/LAMA5/DLG5/WNT4/DDR1/MET/TNC/SPRY1/CELSR1/EDN1/VDR/GPC3/GDNF/BMP2/NRARP/EDNRA/LRP5/PLXND1/AREG/BMP4/GLI2/COL4A1/NPNT/SOX9/WNT9B/PKHD1	26	Basal-cell
GO:0014033	neural crest cell differentiation	19/1229	95/18870	9.84406e-06	0.00071742	0.000583454	LAMA5/WNT10A/NRG1/SNAI2/HES1/EFNB1/EDN1/GDNF/EDNRA/KITLG/HIF1A/BMP4/MEF2C/SOX10/EDNRB/BMPR1A/ANXA6/SOX9/FN1	19	Basal-cell
GO:0010631	epithelial cell migration	47/1229	372/18870	9.91885e-06	0.00071742	0.000583454	CDH13/ITGA3/SMOC2/ITGB1/ITGA2/GPX1/DCN/MIR205/SNAI2/APOE/S100A2/WNT7A/GLUL/TGFB1/MET/ADIPOR1/SERPINF1/EDN1/FERMT1/ANXA3/EMP2/RRAS/THBS1/EDN2/SPRED1/PTPRM/KITLG/RAB25/PLXND1/PRSS3/CARD10/HIF1A/ZEB2/ENPP2/MEF2C/GLIPR2/LRG1/KIT/EVL/ANLN/KRT2/VSTM4/LPXN/SOX9/PIK3CG/MMRN2/MARVELD3	47	Basal-cell
GO:0090132	epithelium migration	47/1229	375/18870	1.22658e-05	0.000875651	0.000712138	CDH13/ITGA3/SMOC2/ITGB1/ITGA2/GPX1/DCN/MIR205/SNAI2/APOE/S100A2/WNT7A/GLUL/TGFB1/MET/ADIPOR1/SERPINF1/EDN1/FERMT1/ANXA3/EMP2/RRAS/THBS1/EDN2/SPRED1/PTPRM/KITLG/RAB25/PLXND1/PRSS3/CARD10/HIF1A/ZEB2/ENPP2/MEF2C/GLIPR2/LRG1/KIT/EVL/ANLN/KRT2/VSTM4/LPXN/SOX9/PIK3CG/MMRN2/MARVELD3	47	Basal-cell
GO:0015911	long-chain fatty acid import across plasma membrane	6/1229	10/18870	1.26124e-05	0.000879046	0.000714899	SLC2A1/SLC27A1/THBS1/ACSL1/SLC27A5/CD36	6	Basal-cell
GO:0030324	lung development	29/1229	188/18870	1.27754e-05	0.000879046	0.000714899	ITGA3/FGFR2/PDGFA/LAMA5/PDPN/NFIB/TP73/DLG5/HES1/TNC/SPRY1/PTK7/CELSR1/HOPX/EPAS1/GPC3/BMP2/EDN2/ERRFI1/BMP4/PLOD3/GLI2/CLCN2/RBBP9/NKX2-8/BMPR1A/HS6ST1/SOX9/ZFPM2	29	Basal-cell
GO:0010712	regulation of collagen metabolic process	12/1229	43/18870	1.27931e-05	0.000879046	0.000714899	ITGB1/ITGA2/CST3/WNT4/TGFB1/SERPINB7/VIM/BMP4/SCX/MYB/LARP6/UCN	12	Basal-cell
GO:0031032	actomyosin structure organization	31/1229	208/18870	1.32313e-05	0.000897931	0.000730258	PDLIM1/ITGB1/MEF2A/TNNT1/MYL9/SMAD3/WNT4/MET/MYOM2/EDN1/ZYX/CNN2/ARAP1/PHLDB2/MYH14/ARHGEF10/CNN3/EPB41L1/NEBL/TNNT3/ARHGEF5/ZEB2/DLC1/TJP1/EVL/BAG4/TMOD1/ARHGEF10L/ANLN/CAPN3/IQGAP3	31	Basal-cell
GO:0044319	wound healing, spreading of cells	11/1229	37/18870	1.51346e-05	0.00100235	0.000815176	FLNA/ITGB1/PDPN/AJUBA/WNT7A/COL5A1/DDR1/CD151/PHLDB2/FERMT1/LRG1	11	Basal-cell
GO:0090505	epiboly involved in wound healing	11/1229	37/18870	1.51346e-05	0.00100235	0.000815176	FLNA/ITGB1/PDPN/AJUBA/WNT7A/COL5A1/DDR1/CD151/PHLDB2/FERMT1/LRG1	11	Basal-cell
GO:0010810	regulation of cell-substrate adhesion	32/1229	220/18870	1.60328e-05	0.00104919	0.000853272	CDH13/ITGA3/FLNA/POSTN/PDPN/ITGA6/COL16A1/SMAD3/WNT4/DDR1/HOXA7/PHLDB2/FERMT1/EMP2/RRAS/THBS1/CX3CL1/PREX1/DLC1/ABI3BP/APOD/PKP2/DMTN/NPNT/FBLN2/LIMS2/CD36/EDIL3/FMN1/PKHD1/FZD4/FN1	32	Basal-cell
GO:0030856	regulation of epithelial cell differentiation	27/1229	171/18870	1.63499e-05	0.00105736	0.000859914	DLL1/TP63/TP73/SPRED2/HES1/KRT36/ALOX15B/SPRY1/HOXA7/VDR/FOXN1/GDNF/BMP2/SULT2B1/GRHL1/SPRED1/ERRFI1/TRIM16/BMP4/IL20/CCND1/ETV4/FST/SOX9/WNT9B/ETV2/S1PR3	27	Basal-cell
GO:0090130	tissue migration	47/1229	380/18870	1.73438e-05	0.00110079	0.000895237	CDH13/ITGA3/SMOC2/ITGB1/ITGA2/GPX1/DCN/MIR205/SNAI2/APOE/S100A2/WNT7A/GLUL/TGFB1/MET/ADIPOR1/SERPINF1/EDN1/FERMT1/ANXA3/EMP2/RRAS/THBS1/EDN2/SPRED1/PTPRM/KITLG/RAB25/PLXND1/PRSS3/CARD10/HIF1A/ZEB2/ENPP2/MEF2C/GLIPR2/LRG1/KIT/EVL/ANLN/KRT2/VSTM4/LPXN/SOX9/PIK3CG/MMRN2/MARVELD3	47	Basal-cell
GO:0014032	neural crest cell development	17/1229	82/18870	1.7422e-05	0.00110079	0.000895237	LAMA5/NRG1/SNAI2/HES1/EFNB1/EDN1/GDNF/EDNRA/KITLG/HIF1A/BMP4/SOX10/EDNRB/BMPR1A/ANXA6/SOX9/FN1	17	Basal-cell
GO:0016055	Wnt signaling pathway	54/1229	459/18870	1.79335e-05	0.00112023	0.000911046	ITGA3/WNT3/DKK3/FGFR2/TAX1BP3/WLS/WNT10A/SNAI2/WNT3A/APOE/SMAD3/WNT7A/TSKU/APP/WNT4/TGFB1/PTK7/CELSR1/MITF/EDN1/GRHL3/GPC3/KREMEN2/TPBG/FERMT1/GNAQ/BMP2/MARK1/SOX7/WNT5B/NRARP/EDNRA/CALCOCO1/LGR6/TMEM67/LRP5/WNT16/DAAM1/ZEB2/FZD6/SOX10/EDNRB/CCND1/IGFBP6/SCEL/SOSTDC1/TCF7L1/DEPDC1B/SOX9/WNT9B/ETV2/HHEX/FZD4/DLX3	54	Basal-cell
GO:0042303	molting cycle	21/1229	117/18870	1.97787e-05	0.00120804	0.000982456	KRT14/TP63/FGFR2/PDGFA/LAMA5/WNT10A/TSKU/KRT27/FOXN1/FERMT1/NGFR/KRT25/FZD6/TSPEAR/GLI2/KRT33B/SOSTDC1/TMEM79/FST/SOX9/DLX3	21	Basal-cell
GO:0042633	hair cycle	21/1229	117/18870	1.97787e-05	0.00120804	0.000982456	KRT14/TP63/FGFR2/PDGFA/LAMA5/WNT10A/TSKU/KRT27/FOXN1/FERMT1/NGFR/KRT25/FZD6/TSPEAR/GLI2/KRT33B/SOSTDC1/TMEM79/FST/SOX9/DLX3	21	Basal-cell
GO:0090504	epiboly	11/1229	38/18870	2.0054e-05	0.00121093	0.000984813	FLNA/ITGB1/PDPN/AJUBA/WNT7A/COL5A1/DDR1/CD151/PHLDB2/FERMT1/LRG1	11	Basal-cell
GO:0198738	cell-cell signaling by wnt	54/1229	461/18870	2.02667e-05	0.00121093	0.000984813	ITGA3/WNT3/DKK3/FGFR2/TAX1BP3/WLS/WNT10A/SNAI2/WNT3A/APOE/SMAD3/WNT7A/TSKU/APP/WNT4/TGFB1/PTK7/CELSR1/MITF/EDN1/GRHL3/GPC3/KREMEN2/TPBG/FERMT1/GNAQ/BMP2/MARK1/SOX7/WNT5B/NRARP/EDNRA/CALCOCO1/LGR6/TMEM67/LRP5/WNT16/DAAM1/ZEB2/FZD6/SOX10/EDNRB/CCND1/IGFBP6/SCEL/SOSTDC1/TCF7L1/DEPDC1B/SOX9/WNT9B/ETV2/HHEX/FZD4/DLX3	54	Basal-cell
GO:0050890	cognition	41/1229	317/18870	2.06984e-05	0.00122343	0.000994976	ITGA3/CCND2/ITGB1/PRNP/APOE/APP/NTRK2/NTF4/SERPINF1/DGCR2/TPBG/CHL1/GRIN2A/GATM/TUSC3/PIAS1/TUBA1A/NLGN4Y/SLC1A4/UBA6/SLC6A1/PDE1B/HIF1A/MEF2C/TREM2/S100B/BRINP1/KIT/DNAH11/NLGN4X/HLA-DRA/HMGCR/KAT2B/HRH1/NRXN3/NTF3/UCN/MEIS2/BCHE/MAPT/FYN	41	Basal-cell
GO:0045684	positive regulation of epidermis development	10/1229	32/18870	2.27571e-05	0.00133081	0.0010823	KRT10/ALOX15B/VDR/SULT2B1/TRIM16/BMP4/IL20/ETV4/KRT2/TMEM79	10	Basal-cell
GO:0002011	morphogenesis of an epithelial sheet	14/1229	60/18870	2.34745e-05	0.00134416	0.00109316	FLNA/ITGB1/PDPN/AJUBA/WNT7A/COL5A1/DDR1/CD151/PHLDB2/FERMT1/HOXB2/LRG1/NOTCH2/HOXB4	14	Basal-cell
GO:0045604	regulation of epidermal cell differentiation	14/1229	60/18870	2.34745e-05	0.00134416	0.00109316	DLL1/TP63/HES1/KRT36/ALOX15B/HOXA7/VDR/SULT2B1/GRHL1/ERRFI1/TRIM16/BMP4/IL20/ETV4	14	Basal-cell
GO:0007015	actin filament organization	54/1229	464/18870	2.42959e-05	0.00137685	0.00111974	PDLIM1/GDPD2/FLNA/RHOV/LIMA1/SMAD3/WNT4/MET/CORO6/FAT1/SYNPO2/GAS7/ZYX/CNN2/ARAP1/PHLDB2/SPTBN2/ARHGEF10/CNN3/EMP2/ESPN/ACTN1/CDC42EP4/NEBL/RUFY3/ARHGEF5/CX3CL1/PREX1/ZEB2/DLC1/AIF1L/TJP1/BIN1/EVL/BAG4/TMOD1/MYO5C/ARHGEF10L/HCLS1/RND3/DMTN/INPPL1/GAS2L3/TPM2/SCIN/GSN/POF1B/WIPF1/IQGAP3/RHOT1/MICAL1/ELMO1/FMN1/MYO5B	54	Basal-cell
GO:0042692	muscle cell differentiation	50/1229	419/18870	2.49317e-05	0.00139847	0.00113733	DLL1/FGFR2/ITGB1/MEF2A/NRG1/GPX1/TNNT1/FHL2/WNT3A/CAV2/EHD2/MYL9/HES1/WNT4/TGFB1/MYOM2/PPP3CA/EDN1/SMARCD3/HOPX/CDON/BMP2/ACTN1/WNT5B/EDNRA/PIAS1/NEBL/TNNT3/CACNB4/LAMC1/BMP4/MEF2C/WFIKKN2/SORT1/KIT/BIN1/MYEF2/EDNRB/TMOD1/DMD/SGCD/HEY1/NPNT/CAPN3/BMPR1A/CD53/ADAMTS5/CDK1/SOX9/NFATC2	50	Basal-cell
GO:0001676	long-chain fatty acid metabolic process	20/1229	110/18870	2.54712e-05	0.00141429	0.0011502	GPX1/PTGS1/ACSL4/CBR1/SLC27A6/ALOX15B/SLC27A1/CYP2S1/GSTM1/HACL1/ACSL1/ACOT7/CYP2U1/FADS1/SLC27A4/ACAD9/SLC27A5/PLP1/ELOVL6/LOC344967	20	Basal-cell
GO:0055094	response to lipoprotein particle	11/1229	39/18870	2.62985e-05	0.00144563	0.00117568	CDH13/ITGB1/APOE/ABCA1/TGFB1/TXNIP/TREM2/LPL/CES1/CD36/SREBF2	11	Basal-cell
GO:0007178	transmembrane receptor protein serine/threonine kinase signaling pathway	49/1229	410/18870	2.87928e-05	0.00156707	0.00127445	ITGA3/DKK3/HTRA1/LTBP4/MIR205/LTBP2/FAM83G/CAV2/ASPN/SMAD3/SPRED2/HES1/TGFB1/TGIF2/SPRY1/ZYX/GAS6/PTPRK/GPC3/RGMA/ITGB8/FERMT1/SDCBP/DACT2/BMP2/TMPRSS6/VIM/THBS1/SPRED1/HPGD/SORL1/BMP4/ZEB2/WFIKKN2/VEPH1/LRG1/NOTCH2/PMEPA1/SOSTDC1/NPNT/LRP2/SCX/BMPR1A/LPXN/FST/COL1A2/ETV2/NCEH1/DLX3	49	Basal-cell
GO:0007229	integrin-mediated signaling pathway	20/1229	111/18870	2.9196e-05	0.00157344	0.00127962	DST/ITGB4/ITGA3/FLNA/ITGB1/LAMA5/ITGA2/ITGA6/TIMP1/COL16A1/CCM2/ZYX/ITGB8/FERMT1/EMP2/LAMC1/ADAMTS1/FERMT3/LIMS2/FN1	20	Basal-cell
GO:0003382	epithelial cell morphogenesis	10/1229	33/18870	3.07551e-05	0.00164136	0.00133487	COL18A1/MET/FAT1/ST14/DACT2/RAB25/PLOD3/SIPA1L3/POF1B/PKHD1	10	Basal-cell
GO:0007162	negative regulation of cell adhesion	40/1229	312/18870	3.18316e-05	0.00168248	0.00136831	ASS1/CDH13/POSTN/PRNP/ASCL2/TGFBI/SNAI2/DLG5/LGALS9B/TGFB1/IRF1/TNC/CBLB/IL20RB/HOXA7/RUNX3/PHLDB2/LGALS9C/PLXNC1/DACT2/BMP2/NRARP/THBS1/PLXND1/CX3CL1/PTPRC/BMP4/ERBB3/DLC1/TNFRSF21/APOD/MMP2/DMTN/LGALS3/TNFAIP8L2/LPXN/PAG1/SPN/FZD4/HAVCR2	40	Basal-cell
GO:0090287	regulation of cellular response to growth factor stimulus	44/1229	357/18870	3.46828e-05	0.00181573	0.00147667	ITGA3/DKK3/DLL1/SMOC2/HTRA1/LTBP4/DCN/CAV2/ASPN/NPTN/SMAD3/SPRED2/HES1/WNT4/TGFB1/SPRY1/GPC3/RGMA/FERMT1/SDCBP/BMP2/TMPRSS6/NGFR/THBS1/SPRED1/SORL1/HIF1A/BMP4/ZEB2/WFIKKN2/VEPH1/LRG1/NOTCH2/PMEPA1/SOSTDC1/NPNT/LRP2/PTPN1/FST/TMEM108/PRKCB/HHEX/MMRN2/FZD4	44	Basal-cell
GO:0015718	monocarboxylic acid transport	27/1229	179/18870	3.76566e-05	0.00194744	0.00158379	SLC2A1/SLCO2A1/SLC6A8/APOE/PLIN2/SLC27A6/EDN1/SLC27A1/BDKRB2/SLC43A3/ABCC3/SLC16A14/THBS1/CRABP2/EMB/ACSL1/PLA2R1/FABP5/SLC16A1/SLC27A4/SLC16A5/CRABP1/CES1/SLC26A6/SLC27A5/CD36/ABCC2	27	Basal-cell
GO:0022612	gland morphogenesis	21/1229	122/18870	3.79072e-05	0.00194744	0.00158379	TP63/FGFR2/PDGFA/LAMA5/SNAI2/NFIB/WNT3A/WNT4/TGFB1/DDR1/TNC/VDR/LRP5/PLXND1/AREG/BMP4/NOTCH2/MMP2/SOSTDC1/LIMS2/SOX9	21	Basal-cell
GO:0022404	molting cycle process	18/1229	96/18870	4.16931e-05	0.00208667	0.00169702	TP63/FGFR2/PDGFA/LAMA5/WNT10A/KRT27/FOXN1/FERMT1/NGFR/KRT25/FZD6/TSPEAR/GLI2/SOSTDC1/TMEM79/FST/SOX9/DLX3	18	Basal-cell
GO:0022405	hair cycle process	18/1229	96/18870	4.16931e-05	0.00208667	0.00169702	TP63/FGFR2/PDGFA/LAMA5/WNT10A/KRT27/FOXN1/FERMT1/NGFR/KRT25/FZD6/TSPEAR/GLI2/SOSTDC1/TMEM79/FST/SOX9/DLX3	18	Basal-cell
GO:0042476	odontogenesis	22/1229	132/18870	4.17562e-05	0.00208667	0.00169702	JAG2/TP63/FGFR2/LAMA5/WLS/WNT10A/ASPN/KLK5/TNC/EDN1/ANKH/BMP2/NGFR/BMP4/TSPEAR/GLI2/SOSTDC1/BMPR1A/FST/PRKCB/COL1A2/DLX3	22	Basal-cell
GO:0008202	steroid metabolic process	41/1229	327/18870	4.27943e-05	0.00210617	0.00171288	DKK3/LIMA1/LCAT/SNAI2/PLEKHA1/APOE/CBR1/TSKU/CYB5R1/ABCA1/APP/WNT4/LPCAT3/SULT1E1/BMP2/SRD5A3/NR1D1/FDFT1/SULT2B1/LRP5/DHCR24/HSD17B14/KIT/EDNRB/STAR/CLCN2/ASAH1/CES1/HMGCR/LRP2/APOBR/SLC27A5/IGFBP7/EPHX2/SREBF2/ACAA2/TM7SF2/OSBPL7/SERPINA12/APOL1/CYP4V2	41	Basal-cell
GO:0032964	collagen biosynthetic process	12/1229	48/18870	4.29127e-05	0.00210617	0.00171288	SERPINH1/ITGA2/WNT4/TGFB1/COL5A1/SERPINB7/VIM/BMP4/SCX/MYB/LARP6/UCN	12	Basal-cell
GO:0007611	learning or memory	36/1229	274/18870	4.63881e-05	0.0022566	0.00183521	ITGA3/CCND2/ITGB1/PRNP/APOE/APP/NTRK2/NTF4/SERPINF1/TPBG/GRIN2A/GATM/PIAS1/TUBA1A/NLGN4Y/UBA6/SLC6A1/PDE1B/HIF1A/MEF2C/TREM2/S100B/BRINP1/KIT/DNAH11/NLGN4X/HMGCR/KAT2B/HRH1/NRXN3/NTF3/UCN/MEIS2/BCHE/MAPT/FYN	36	Basal-cell
GO:0030879	mammary gland development	22/1229	133/18870	4.70078e-05	0.00226668	0.00184342	WNT3/FGFR2/ITGA2/NRG1/GPX1/WNT3A/NCOR2/WNT4/DDR1/VDR/HOXA9/LRP5/AREG/HIF1A/BMP4/CSN2/GLI2/CCND1/SOSTDC1/IQGAP3/SOX9/SOCS2	22	Basal-cell
GO:0003007	heart morphogenesis	35/1229	264/18870	4.87774e-05	0.00233156	0.00189618	FLNA/DLL1/FGFR2/NRG1/SNAI2/FHL2/WNT3A/SMAD3/DSP/HES1/TGFB1/COL5A1/SPRY1/EDN1/SMARCD3/BMP2/EMP2/IFT172/EDNRA/WNT16/PLXND1/HIF1A/BMP4/MEF2C/DLC1/ADAMTS1/DNAH11/NOTCH2/PKP2/HEY1/LRP2/BMPR1A/ADAMTS5/SOX9/ZFPM2	35	Basal-cell
GO:0043589	skin morphogenesis	6/1229	12/18870	4.95296e-05	0.0023471	0.00190882	ITGB4/TP63/ITGA2/ITGA6/ERRFI1/COL1A2	6	Basal-cell
GO:0071466	cellular response to xenobiotic stimulus	28/1229	192/18870	5.06391e-05	0.00237917	0.0019349	PRNP/ALDH3A1/CBR1/ABCA1/GSTA4/EDN1/GSTM3/GAS6/FMO1/ABCC3/CYP2S1/VAV2/GSTA3/GSTM1/CMBL/ACSL1/MEF2C/CYP2U1/SOX10/UGT1A10/VKORC1/NAT1/AHR/AOX1/CERS1/ABCC2/NCEH1/BCHE	28	Basal-cell
GO:0044539	long-chain fatty acid import into cell	7/1229	17/18870	5.32168e-05	0.00247102	0.0020096	SLC2A1/SLC27A1/THBS1/ACSL1/SLC27A4/SLC27A5/CD36	7	Basal-cell
GO:0015711	organic anion transport	51/1229	443/18870	5.38043e-05	0.00247102	0.0020096	SLC38A5/ITGB1/SLC2A1/GLTP/SLCO2A1/SLC6A8/APOE/SLC39A14/CYB5R1/SLC1A3/PLIN2/SLC7A1/SLC27A6/NTRK2/SLC7A5/EDN1/SLC27A1/BDKRB2/SLC43A3/SLC43A1/SLC1A5/ABCC3/ANKH/LRRC8D/SLC16A14/THBS1/SLC47A1/SLC25A38/CRABP2/LRP5/BEST1/SLC1A4/EMB/CACNB4/SLC6A1/ACSL1/PLA2R1/SLC38A4/FABP5/SLC16A1/SLC1A2/SLC27A4/SLC16A5/CRABP1/CES1/LRP2/SLC26A6/SLC27A5/CD36/PSAP/ABCC2	51	Basal-cell
GO:0009612	response to mechanical stimulus	30/1229	213/18870	5.39426e-05	0.00247102	0.0020096	POSTN/KRT5/ITGA2/SLC2A1/SLC1A3/KCNJ2/IRF1/XPC/TXNIP/TNC/EDN1/CNN2/TNFRSF10B/THBS1/TUBA1A/BDKRB1/MAP1B/SLITRK6/KIT/DMD/IL33/MMP2/SCEL/SCX/GSN/SOX9/UCN/STRC/MEIS2/FYN	30	Basal-cell
GO:1902850	microtubule cytoskeleton organization involved in mitosis	25/1229	163/18870	5.44211e-05	0.00247234	0.00201067	FLNA/ITGB1/GPSM2/SPRY1/ARHGEF10/TACC3/PSRC1/TTK/KIF23/CDC20/SPC25/KIFC2/NUF2/NDC80/CDCA8/PARP3/WDR62/EFHC1/KIFC1/CDK1/CENPA/NUSAP1/PKHD1/MYBL2/PRC1	25	Basal-cell
GO:0071402	cellular response to lipoprotein particle stimulus	11/1229	42/18870	5.60655e-05	0.00252617	0.00205445	CDH13/ITGB1/APOE/ABCA1/TGFB1/TXNIP/TREM2/LPL/CES1/CD36/SREBF2	11	Basal-cell
GO:0060541	respiratory system development	30/1229	214/18870	5.89123e-05	0.00263285	0.00214121	ASS1/ITGA3/FGFR2/PDGFA/LAMA5/PDPN/NFIB/TP73/DLG5/HES1/TNC/SPRY1/PTK7/CELSR1/HOPX/EPAS1/GPC3/BMP2/EDN2/ERRFI1/BMP4/PLOD3/GLI2/CLCN2/RBBP9/NKX2-8/BMPR1A/HS6ST1/SOX9/ZFPM2	30	Basal-cell
GO:0014002	astrocyte development	11/1229	43/18870	7.09404e-05	0.00314483	0.00255759	DLL1/APP/IFNGR1/NR1D1/VIM/ROR2/ZEB2/TREM2/PLP1/MAPT/TSPAN2	11	Basal-cell
GO:0007409	axonogenesis	51/1229	448/18870	7.18818e-05	0.00316108	0.0025708	WNT3/FGFR2/ITGB1/NOTCH3/NFIB/WNT3A/APOE/WNT7A/TSKU/APP/NTRK2/EFNB1/AUTS2/PTK7/IGSF9/EDN1/TTL/RGMA/GDNF/PLXNC1/NGFR/CHL1/EDNRA/EDN2/LGR6/PTPRM/CRABP2/RUFY3/MAP1B/EMB/PLXND1/ARHGEF28/SLITRK6/RPS6KA5/S100B/CNTN1/TRPV2/GLI2/NOTCH2/L1CAM/TUBB3/ARHGAP4/B4GALT6/NKX2-8/TUBB2B/NRXN3/SLITRK2/MAPT/FN1/LHX4/FYN	51	Basal-cell
GO:0098656	monoatomic anion transmembrane transport	23/1229	147/18870	7.7937e-05	0.00340016	0.00276523	PRNP/SLC12A4/SLC39A14/SLC1A3/ANO1/ABCC3/CLCC1/OCA2/LRRC8D/BEST1/SLC1A4/SLC6A1/CLCA4/CLCN2/SLC1A2/CLIC3/SLC26A6/GABRD/ABCC2/GABRA4/CLDN4/TTYH2/APOL1	23	Basal-cell
GO:0051216	cartilage development	29/1229	207/18870	7.85839e-05	0.00340138	0.00276623	EFEMP1/SERPINH1/TGFBI/SNAI2/NFIB/TIMP1/SLC39A14/SMAD3/WNT7A/TSKU/TGFB1/EDN1/RUNX3/ITGB8/BMP2/WNT5B/HIF1A/BMP4/MEF2C/EXT2/GHR/ARID5A/SCX/CYTL1/SCIN/BMPR1A/ANXA6/SOX9/NFATC2	29	Basal-cell
GO:0043410	positive regulation of MAPK cascade	53/1229	474/18870	8.38314e-05	0.00360017	0.00292789	FGFR2/PDGFA/PDGFC/MST1R/NRG1/ACKR3/TP73/APOE/CAV2/CCL2/WNT7A/APP/TGFB1/NTRK2/EDN1/GAS6/MAPKBP1/TPBG/SDCBP/CDON/BMP2/IL34/THBS1/TRAF4/WNT16/IGFBP3/ARHGEF5/CX3CL1/PTPRC/BMP4/MEF2C/TREM2/GLIPR2/AKAP12/KIT/GHR/NOTCH2/IGFBP6/MAP4K1/SHC1/NPNT/BIRC7/PTPN1/PIK3R6/GADD45B/CD36/IQGAP3/CARD9/NTF3/PIK3CG/KSR1/DOK1/HAVCR2	53	Basal-cell
GO:0016053	organic acid biosynthetic process	41/1229	337/18870	8.47253e-05	0.00361035	0.00293618	ASS1/PTGS1/GAMT/CBR1/GLUL/SLC1A3/ALOX15B/UGDH/EDN1/DSE/FMO1/PCBD1/NR1D1/SCD/GSTM1/GATM/EDN2/GGT6/PLOD3/ACOT7/SLC45A3/HACD2/TECRL/FADS1/FABP5/STAR/LPL/CES1/KAT2B/BCAT1/SLC27A5/PLP1/FADS6/ELOVL6/ILVBL/FADS3/ALOX5AP/OSBPL7/LOC344967/ABHD3/BRCA1	41	Basal-cell
GO:0042438	melanin biosynthetic process	8/1229	24/18870	9.08092e-05	0.00382426	0.00311014	OCA2/SLC24A5/ZEB2/MC1R/DCT/TYR/PMEL/TYRP1	8	Basal-cell
GO:0002052	positive regulation of neuroblast proliferation	10/1229	37/18870	9.11367e-05	0.00382426	0.00311014	ITGB1/SMARCD3/CDON/CX3CL1/HIF1A/BCAN/DCT/SOX10/WDR62/HAPLN3	10	Basal-cell
GO:0001942	hair follicle development	17/1229	93/18870	9.40571e-05	0.00391691	0.00318549	TP63/FGFR2/PDGFA/LAMA5/WNT10A/KRT27/FOXN1/FERMT1/NGFR/KRT25/FZD6/GLI2/SOSTDC1/TMEM79/FST/SOX9/DLX3	17	Basal-cell
GO:0070661	leukocyte proliferation	42/1229	350/18870	9.53647e-05	0.0039415	0.00320549	PRNP/LMO1/WNT3A/DLG5/SLC7A1/HES1/LGALS9B/WNT4/IRF1/EFNB1/BAP1/CD151/PPP3CA/CD276/CBLB/IL20RB/CNN2/LGALS9C/EMP2/IL34/KITLG/CDKN1A/CX3CL1/BTN3A1/PTPRC/BMP4/MEF2C/TREM2/KIT/TNFRSF21/HLA-DPA1/IL33/HLA-DPB1/LGALS3/AHR/NFATC2/TYROBP/PIK3CG/SPN/HHEX/FYN/HAVCR2	42	Basal-cell
GO:0006066	alcohol metabolic process	44/1229	373/18870	9.79854e-05	0.0040196	0.003269	MOXD1/DKK3/ALDH3B2/LIMA1/LCAT/ALDH3B1/APOE/TSKU/ABCA1/APP/WNT4/LPCAT3/SULT1E1/BMP2/PCBD1/SRD5A3/RDH12/FDFT1/SGPP2/SULT2B1/GALK1/ACER3/LRP5/DEGS2/DHCR24/AKR1B10/EDNRB/STAR/CLCN2/PTAFR/ISYNA1/ASAH1/CES1/HMGCR/LRP2/APOBR/HRH1/EPHX2/SREBF2/ACAA2/TM7SF2/SERPINA12/IDH2/APOL1	44	Basal-cell
GO:0099177	regulation of trans-synaptic signaling	54/1229	490/18870	0.000105562	0.00429831	0.00349567	CLSTN1/ITGB1/PRNP/NSG1/WNT3A/APOE/CCL2/NPTN/WNT7A/SLC1A3/APP/NTRK2/NMU/NTF4/PPP3CA/EDN1/NGFR/GRIN2A/MAP1B/NLGN4Y/ROR2/CACNB4/SLC6A1/CX3CL1/MEF2C/AKAP12/ADORA2B/S100B/KIT/FABP5/NLGN4X/CDC20/APBA2/DLGAP1/CALB2/GRIK2/HMGCR/HRH1/SYN1/TUBB2B/SRGN/SYBU/SYT7/TMEM108/NTF3/SNCG/PRKCB/UCN/TYROBP/CAMK2B/BCHE/MAPT/VPS18/FYN	54	Basal-cell
GO:0021782	glial cell development	20/1229	122/18870	0.000116144	0.00464151	0.00377479	ITGB4/DLL1/APP/NTRK2/IFNGR1/ARHGEF10/ANO1/NR1D1/VIM/TENM4/ROR2/ZEB2/TREM2/SOX10/CNTN1/B4GALT6/MAL/PLP1/MAPT/TSPAN2	20	Basal-cell
GO:0032965	regulation of collagen biosynthetic process	10/1229	38/18870	0.000116523	0.00464151	0.00377479	ITGA2/WNT4/TGFB1/SERPINB7/VIM/BMP4/SCX/MYB/LARP6/UCN	10	Basal-cell
GO:0071404	cellular response to low-density lipoprotein particle stimulus	10/1229	38/18870	0.000116523	0.00464151	0.00377479	CDH13/ITGB1/ABCA1/TGFB1/TXNIP/TREM2/LPL/CES1/CD36/SREBF2	10	Basal-cell
GO:0051017	actin filament bundle assembly	24/1229	161/18870	0.000120074	0.00472222	0.00384042	PDLIM1/FLNA/LIMA1/SMAD3/WNT4/MET/SYNPO2/ZYX/ARAP1/PHLDB2/ARHGEF10/ESPN/ACTN1/ARHGEF5/CX3CL1/ZEB2/DLC1/AIF1L/TJP1/EVL/BAG4/ARHGEF10L/DMTN/MICAL1	24	Basal-cell
GO:0051897	positive regulation of phosphatidylinositol 3-kinase/protein kinase B signal transduction	25/1229	171/18870	0.000120267	0.00472222	0.00384042	PDGFA/ITGB1/PDGFC/MST1R/GPX1/DCN/TGFB1/NTRK2/DDR1/GAS6/TPBG/THBS1/WNT16/ROR2/CX3CL1/MC1R/TREM2/ERBB3/KIT/BAG4/HCLS1/LRP2/SOX9/PIK3CG/FN1	25	Basal-cell
GO:0060560	developmental growth involved in morphogenesis	32/1229	244/18870	0.00012392	0.0047662	0.00387619	WNT3/POSTN/FGFR2/ITGB1/WNT3A/APOE/APP/DDR1/TNC/AUTS2/SPRY1/PTK7/EDN1/TTL/RGMA/EDNRA/EDN2/CRABP2/RUFY3/MAP1B/AREG/BMP4/S100B/TRPV2/SYT17/L1CAM/ARHGAP4/SOX9/TMEM108/FMN1/MAPT/FN1	32	Basal-cell
GO:0090497	mesenchymal cell migration	13/1229	61/18870	0.000123989	0.0047662	0.00387619	LAMA5/EFNB1/EDN1/TPBG/GDNF/EDNRA/KITLG/HIF1A/BMP4/SOX10/EDNRB/ANXA6/FN1	13	Basal-cell
GO:1905517	macrophage migration	13/1229	61/18870	0.000123989	0.0047662	0.00387619	CCL2/CNN2/MMP28/IL34/THBS1/EDN2/ROR2/CX3CL1/TREM2/EDNRB/SAA1/MMP2/LGALS3	13	Basal-cell
GO:0010811	positive regulation of cell-substrate adhesion	20/1229	123/18870	0.000130356	0.00497614	0.00404693	CDH13/ITGA3/FLNA/ITGA6/COL16A1/SMAD3/WNT4/FERMT1/EMP2/RRAS/CX3CL1/PREX1/ABI3BP/NPNT/FBLN2/LIMS2/CD36/EDIL3/FMN1/FN1	20	Basal-cell
GO:0035272	exocrine system development	11/1229	46/18870	0.000137398	0.00520881	0.00423615	FGFR2/PDGFA/LAMA5/WLS/SNAI2/NFIB/TGFB1/PLXND1/SOX10/CLCN2/SOX9	11	Basal-cell
GO:0032908	regulation of transforming growth factor beta1 production	6/1229	14/18870	0.000143711	0.00536767	0.00436534	TSKU/LAPTM4B/SERPINB7/THBS1/CX3CL1/TYROBP	6	Basal-cell
GO:0048863	stem cell differentiation	32/1229	246/18870	0.000144473	0.00536767	0.00436534	WNT3/KRT14/TP63/ZFP36L2/FGFR2/ITGB1/LAMA5/WNT10A/NRG1/SNAI2/WNT7A/HES1/EFNB1/EDN1/HOXA7/GDNF/EDNRA/KITLG/PTPRC/HIF1A/BMP4/MEF2C/SOX10/KIT/EDNRB/HOXB4/BMPR1A/ANXA6/SOX9/BATF/SHC4/FN1	32	Basal-cell
GO:0046394	carboxylic acid biosynthetic process	40/1229	334/18870	0.000144518	0.00536767	0.00436534	ASS1/PTGS1/GAMT/CBR1/GLUL/SLC1A3/ALOX15B/UGDH/EDN1/DSE/PCBD1/NR1D1/SCD/GSTM1/GATM/EDN2/GGT6/PLOD3/ACOT7/SLC45A3/HACD2/TECRL/FADS1/FABP5/STAR/LPL/CES1/KAT2B/BCAT1/SLC27A5/PLP1/FADS6/ELOVL6/ILVBL/FADS3/ALOX5AP/OSBPL7/LOC344967/ABHD3/BRCA1	40	Basal-cell
GO:0098742	cell-cell adhesion via plasma-membrane adhesion molecules	35/1229	279/18870	0.000149533	0.00551667	0.00448652	CDH13/ITGA3/CLSTN1/ITGB1/AJUBA/NPTN/PTK7/PCDH7/FAT1/CELSR1/IGSF9/TENM2/IL1RAP/CDH22/DSG1/BMP2/PTPRM/DSG2/TENM4/EMB/CLDN8/CX3CL1/CDH8/LGALS7B/DSC1/CLDN1/L1CAM/SDK2/DSC3/PCDHGA7/CADM3/SLITRK2/HMCN1/PCDHB5/CLDN4	35	Basal-cell
GO:0045685	regulation of glial cell differentiation	15/1229	79/18870	0.000153731	0.00563372	0.00458172	TP73/HES1/TGFB1/BMP2/NR1D1/IL34/TMEM98/TENM4/TREM2/SLC45A3/TNFRSF21/BIN1/CLCN2/IL33/CDK1	15	Basal-cell
GO:0048709	oligodendrocyte differentiation	18/1229	106/18870	0.000158609	0.00575989	0.00468432	TP73/HES1/NTRK2/IL34/TMEM98/TENM4/SLC45A3/SOX10/TNFRSF21/CNTN1/CLCN2/IL33/B4GALT6/MAL/PLP1/SOX9/CDKN2C/TSPAN2	18	Basal-cell
GO:0016125	sterol metabolic process	23/1229	154/18870	0.000160202	0.00575989	0.00468432	LIMA1/LCAT/APOE/TSKU/CYB5R1/ABCA1/APP/LPCAT3/FDFT1/SULT2B1/LRP5/DHCR24/STAR/CES1/HMGCR/APOBR/EPHX2/SREBF2/ACAA2/TM7SF2/SERPINA12/APOL1/CYP4V2	23	Basal-cell
GO:0072330	monocarboxylic acid biosynthetic process	30/1229	226/18870	0.000160317	0.00575989	0.00468432	PTGS1/GAMT/CBR1/ALOX15B/EDN1/DSE/NR1D1/SCD/GSTM1/GATM/EDN2/ACOT7/SLC45A3/HACD2/TECRL/FADS1/FABP5/STAR/LPL/CES1/KAT2B/SLC27A5/PLP1/FADS6/ELOVL6/FADS3/OSBPL7/LOC344967/ABHD3/BRCA1	30	Basal-cell
GO:0006805	xenobiotic metabolic process	20/1229	125/18870	0.000163452	0.005822	0.00473484	ALDH3A1/CBR1/GSTA4/GSTM3/FMO1/ABCC3/CYP2S1/GSTA3/GSTM1/CMBL/ACSL1/CYP2U1/UGT1A10/VKORC1/NAT1/AHR/AOX1/ABCC2/NCEH1/BCHE	20	Basal-cell
GO:0070371	ERK1 and ERK2 cascade	40/1229	336/18870	0.000164164	0.005822	0.00473484	ZFP36L2/FGFR2/PDGFA/PDGFC/NRG1/ACKR3/MIR205/APOE/CCL2/SPRED2/APP/TGFB1/SPRY1/EDN1/GAS6/TPBG/BMP2/RRAS/SPRED1/CX3CL1/PTPRC/BMP4/DUSP6/TREM2/GLIPR2/AKAP12/NOTCH2/DUSP9/SHC1/NPNT/HMGCR/PTPN1/CD36/IQGAP3/CDK1/SOX9/CARD9/PKHD1/FN1/HAVCR2	40	Basal-cell
GO:0006582	melanin metabolic process	8/1229	26/18870	0.000171604	0.00600832	0.00488637	OCA2/SLC24A5/ZEB2/MC1R/DCT/TYR/PMEL/TYRP1	8	Basal-cell
GO:0044550	secondary metabolite biosynthetic process	8/1229	26/18870	0.000171604	0.00600832	0.00488637	OCA2/SLC24A5/ZEB2/MC1R/DCT/TYR/PMEL/TYRP1	8	Basal-cell
GO:2000179	positive regulation of neural precursor cell proliferation	13/1229	63/18870	0.000175083	0.00609133	0.00495388	FLNA/ITGB1/WNT3A/SMARCD3/CDON/CX3CL1/HIF1A/BCAN/DCT/SOX10/WDR62/LRP2/HAPLN3	13	Basal-cell
GO:0061572	actin filament bundle organization	24/1229	165/18870	0.000176531	0.00610309	0.00496344	PDLIM1/FLNA/LIMA1/SMAD3/WNT4/MET/SYNPO2/ZYX/ARAP1/PHLDB2/ARHGEF10/ESPN/ACTN1/ARHGEF5/CX3CL1/ZEB2/DLC1/AIF1L/TJP1/EVL/BAG4/ARHGEF10L/DMTN/MICAL1	24	Basal-cell
GO:0140354	lipid import into cell	7/1229	20/18870	0.000178395	0.00612899	0.0049845	SLC2A1/SLC27A1/THBS1/ACSL1/SLC27A4/SLC27A5/CD36	7	Basal-cell
GO:0002088	lens development in camera-type eye	16/1229	89/18870	0.0001832	0.00625496	0.00508695	SMAD3/WNT7A/SPRED2/SPRY1/FAT1/CDON/VIM/WNT5B/SPRED1/SLITRK6/BMP4/SIX5/TMOD1/BIRC7/CRYBB3/HSF4	16	Basal-cell
GO:0045616	regulation of keratinocyte differentiation	10/1229	40/18870	0.000185463	0.00626044	0.00509141	TP63/KRT36/ALOX15B/HOXA7/VDR/GRHL1/ERRFI1/TRIM16/IL20/ETV4	10	Basal-cell
GO:0050804	modulation of chemical synaptic transmission	53/1229	489/18870	0.000185638	0.00626044	0.00509141	CLSTN1/ITGB1/PRNP/NSG1/WNT3A/APOE/CCL2/NPTN/WNT7A/SLC1A3/APP/NTRK2/NMU/NTF4/PPP3CA/EDN1/NGFR/GRIN2A/MAP1B/NLGN4Y/ROR2/CACNB4/SLC6A1/CX3CL1/MEF2C/AKAP12/ADORA2B/S100B/KIT/NLGN4X/CDC20/APBA2/DLGAP1/CALB2/GRIK2/HMGCR/HRH1/SYN1/TUBB2B/SRGN/SYBU/SYT7/TMEM108/NTF3/SNCG/PRKCB/UCN/TYROBP/CAMK2B/BCHE/MAPT/VPS18/FYN	53	Basal-cell
GO:0050678	regulation of epithelial cell proliferation	46/1229	407/18870	0.000188308	0.00631177	0.00513315	CDH13/TP63/FGFR2/LAMA5/GPX1/MIR205/SNAI2/NFIB/WNT3A/APOE/CAV2/CCL2/SMAD3/WNT7A/HES1/TGFB1/SERPINF1/VDR/PTPRK/RUNX3/GPC3/NR1D1/NGFR/SGPP2/NRARP/THBS1/IFT172/PTPRM/LAMC1/AREG/HIF1A/BMP4/MEF2C/LRG1/EDNRB/CLDN1/NOTCH2/CCND1/NKX2-8/BMPR1A/LIMS2/IQGAP3/SOX9/MMRN2/PKHD1/MARVELD3	46	Basal-cell
GO:0061436	establishment of skin barrier	9/1229	33/18870	0.000189565	0.0063154	0.0051361	TP63/KRT1/MET/GRHL3/GRHL1/CLDN1/CYSRT1/TMEM79/CLDN4	9	Basal-cell
GO:0060070	canonical Wnt signaling pathway	38/1229	316/18870	0.000192599	0.00637387	0.00518366	WNT3/DKK3/FGFR2/WLS/WNT10A/SNAI2/WNT3A/APOE/SMAD3/WNT7A/WNT4/TGFB1/PTK7/EDN1/GPC3/TPBG/FERMT1/GNAQ/BMP2/SOX7/WNT5B/NRARP/EDNRA/LGR6/LRP5/WNT16/ZEB2/FZD6/SOX10/EDNRB/IGFBP6/SCEL/SOSTDC1/TCF7L1/SOX9/WNT9B/HHEX/FZD4	38	Basal-cell
GO:0014015	positive regulation of gliogenesis	14/1229	72/18870	0.000194393	0.00637387	0.00518366	TP73/HES1/TGFB1/SLC7A5/ETV5/BMP2/IL34/TENM4/SOX10/BIN1/CLCN2/IL33/LRP2/MYB	14	Basal-cell
GO:1905039	carboxylic acid transmembrane transport	23/1229	156/18870	0.000194799	0.00637387	0.00518366	SLC38A5/ITGB1/SLC2A1/SLC6A8/SLC1A3/SLC7A1/SLC7A5/SLC27A1/SLC43A1/SLC1A5/LRRC8D/THBS1/SLC47A1/SLC25A38/SLC1A4/EMB/ACSL1/SLC38A4/SLC16A1/SLC1A2/LRP2/SLC27A5/CD36	23	Basal-cell
GO:0051346	negative regulation of hydrolase activity	29/1229	218/18870	0.000197135	0.00641215	0.00521478	SERPINH1/GPX1/TIMP1/SLC39A14/CST3/SERPINF1/SERPINB7/GAS6/SERPINB6/SERPING1/TIMP2/THBS1/DHCR24/GCHFR/SORL1/ANGPTL4/CPEB2/CSTB/SORT1/BIN1/PLA2R1/CRY2/CSN2/LGALS3/IFI6/CSTA/SERPINB12/CHP1/SERPINA12	29	Basal-cell
GO:0003206	cardiac chamber morphogenesis	20/1229	127/18870	0.000203729	0.00658762	0.00535749	FGFR2/NRG1/FHL2/DSP/HES1/TGFB1/SMARCD3/BMP2/EDNRA/HIF1A/BMP4/MEF2C/ADAMTS1/DNAH11/NOTCH2/PKP2/HEY1/LRP2/BMPR1A/ZFPM2	20	Basal-cell
GO:0007422	peripheral nervous system development	15/1229	81/18870	0.000205479	0.00659634	0.00536458	ITGB4/NTRK2/NTF4/GSTM3/RUNX3/ARHGEF10/GDNF/PMP22/NHLH2/ERBB3/SOX10/EDNRB/CLDN1/CDK1/NTF3	15	Basal-cell
GO:0008542	visual learning	11/1229	48/18870	0.000206398	0.00659634	0.00536458	ITGB1/APP/GRIN2A/PIAS1/TUBA1A/PDE1B/HIF1A/KIT/HMGCR/HRH1/MEIS2	11	Basal-cell
GO:0007632	visual behavior	12/1229	56/18870	0.000212087	0.00673897	0.00548058	ITGB1/APP/GRIN2A/PIAS1/TUBA1A/PDE1B/HIF1A/KIT/SLC1A2/HMGCR/HRH1/MEIS2	12	Basal-cell
GO:1903825	organic acid transmembrane transport	23/1229	157/18870	0.000214454	0.00677503	0.0055099	SLC38A5/ITGB1/SLC2A1/SLC6A8/SLC1A3/SLC7A1/SLC7A5/SLC27A1/SLC43A1/SLC1A5/LRRC8D/THBS1/SLC47A1/SLC25A38/SLC1A4/EMB/ACSL1/SLC38A4/SLC16A1/SLC1A2/LRP2/SLC27A5/CD36	23	Basal-cell
GO:0002934	desmosome organization	5/1229	10/18870	0.000222172	0.0069427	0.00564626	SNAI2/DSP/GRHL1/DSG2/PKP2	5	Basal-cell
GO:0043087	regulation of GTPase activity	37/1229	307/18870	0.000222288	0.0069427	0.00564626	TAX1BP3/ITGB1/ITGA6/CAV2/CCL2/NTRK2/MET/RAPGEF1/NGEF/ARAP1/ARHGEF10/PLXNC1/VAV2/ARHGEF5/ARHGAP29/PLXND1/NET1/CPEB2/RASGEF1B/CX3CL1/RALGPS2/PREX1/SIPA1L3/TBC1D1/SLC27A4/ARHGAP22/TBC1D8B/STMN3/CHN2/FGD2/RAPGEFL1/PROM2/SRGAP2/NTF3/RGL3/AGAP6/RANGAP1	37	Basal-cell
GO:0010763	positive regulation of fibroblast migration	6/1229	15/18870	0.00022634	0.00699613	0.00568972	ITGB1/TGFB1/THBS1/AKAP12/BAG4/DMTN	6	Basal-cell
GO:0061448	connective tissue development	35/1229	285/18870	0.000226544	0.00699613	0.00568972	EFEMP1/SLC39A13/SERPINH1/TGFBI/SNAI2/NFIB/TIMP1/SLC39A14/SMAD3/WNT7A/TSKU/TGFB1/COL5A1/SERPINB7/EDN1/RUNX3/ITGB8/BMP2/WNT5B/LRP5/SORL1/HIF1A/BMP4/MEF2C/EXT2/GHR/ARID5A/LPL/SCX/CYTL1/SCIN/BMPR1A/ANXA6/SOX9/NFATC2	35	Basal-cell
GO:0048545	response to steroid hormone	39/1229	330/18870	0.000229101	0.00703559	0.00572181	ASS1/TP63/ZFP36L2/NCOR2/TGFB1/TXNIP/SERPINF1/EDN1/DSG1/ANXA3/NR1D1/THBS1/CALCOCO1/SCNN1A/DSG2/RXRG/CDKN1A/PTPRC/AREG/FIBIN/SOX10/CRY2/GHR/CLDN1/PMEPA1/PTAFR/TRIM63/TRERF1/IGFBP7/CARD9/OR51E2/ESRRG/PADI2/UCN/BCHE/PAQR8/CLDN4/VPS18/BRCA1	39	Basal-cell
GO:0045785	positive regulation of cell adhesion	52/1229	482/18870	0.000238155	0.00727298	0.00591487	CDH13/ITGA3/FLNA/ITGA2/PDPN/SOX12/ITGA6/WNT3A/COL16A1/CCL2/SMAD3/SLC7A1/HES1/WNT4/TNFRSF18/EFNB1/PPP3CA/CD276/SMARCD3/RUNX3/FERMT1/EMP2/RRAS/KITLG/CX3CL1/LAMC1/PTPRC/PREX1/VNN1/LGALS1/TJP1/BAG4/GLI2/SAA1/ABI3BP/HLA-DPA1/PTAFR/HLA-DPB1/HLA-DRA/CYTH3/NPNT/PIK3R6/FBLN2/LIMS2/CD36/EDIL3/CD83/SPN/FMN1/FN1/FYN/HAVCR2	52	Basal-cell
GO:0014013	regulation of gliogenesis	18/1229	110/18870	0.000256068	0.00777681	0.00632462	ASCL2/TP73/HES1/TGFB1/SLC7A5/ETV5/BMP2/NR1D1/IL34/TMEM98/TENM4/TREM2/SOX10/BIN1/CLCN2/IL33/LRP2/MYB	18	Basal-cell
GO:0031346	positive regulation of cell projection organization	41/1229	355/18870	0.00026198	0.00791266	0.0064351	ITGA3/WNT3/FLNA/ITGA2/ITGA6/WNT3A/APOE/NPTN/NTRK2/DDR1/RAPGEF1/AUTS2/SERPINF1/PTK7/PLEK2/TENM2/ARAP1/RGMA/PLXNC1/CDC42EP4/CRABP2/RUFY3/MAP1B/ROR2/PLXND1/CX3CL1/ENPP2/KIT/CNTN1/TRPV2/L1CAM/ANLN/KAT2B/TUBB2B/PROM2/EPS8L1/CAMK2B/MAPT/FZD4/FN1/FYN	41	Basal-cell
GO:0008203	cholesterol metabolic process	21/1229	140/18870	0.000285484	0.00853853	0.0069441	LIMA1/LCAT/APOE/TSKU/ABCA1/APP/LPCAT3/FDFT1/SULT2B1/LRP5/DHCR24/STAR/CES1/HMGCR/APOBR/EPHX2/SREBF2/ACAA2/TM7SF2/SERPINA12/APOL1	21	Basal-cell
GO:1902652	secondary alcohol metabolic process	22/1229	150/18870	0.000286559	0.00853853	0.0069441	LIMA1/LCAT/APOE/TSKU/ABCA1/APP/LPCAT3/FDFT1/SULT2B1/LRP5/DHCR24/STAR/CES1/HMGCR/APOBR/EPHX2/SREBF2/ACAA2/TM7SF2/SERPINA12/IDH2/APOL1	22	Basal-cell
GO:0010717	regulation of epithelial to mesenchymal transition	18/1229	111/18870	0.000287362	0.00853853	0.0069441	PHLDB1/PDPN/ZNF750/SMAD3/SPRED2/TGFB1/ADIPOR1/SPRY1/PHLDB2/SDCBP/BMP2/MARK1/EMP2/SPRED1/ALX1/BMP4/GLIPR2/LRG1	18	Basal-cell
GO:0042306	regulation of protein import into nucleus	12/1229	58/18870	0.000300252	0.008745	0.00711202	FLNA/SMAD3/TGFB1/CHP2/FERMT1/BMP4/APOD/HCLS1/EFCAB7/CD36/CDK1/CHP1	12	Basal-cell
GO:0070663	regulation of leukocyte proliferation	33/1229	267/18870	0.000300262	0.008745	0.00711202	PRNP/LMO1/WNT3A/DLG5/SLC7A1/HES1/LGALS9B/IRF1/EFNB1/PPP3CA/CD276/CBLB/IL20RB/CNN2/LGALS9C/IL34/KITLG/CDKN1A/PTPRC/BMP4/MEF2C/KIT/TNFRSF21/HLA-DPA1/IL33/HLA-DPB1/LGALS3/AHR/NFATC2/TYROBP/SPN/HHEX/HAVCR2	33	Basal-cell
GO:0070167	regulation of biomineral tissue development	17/1229	102/18870	0.000300726	0.008745	0.00711202	ASPN/SMAD3/WNT4/TGFB1/SLC20A2/VDR/GAS6/ATP2B1/ANKH/BMP2/HIF1A/BMP4/MEF2C/HEY1/SRGN/BMPR1A/SOX9	17	Basal-cell
GO:0089718	amino acid import across plasma membrane	11/1229	50/18870	0.000302673	0.008745	0.00711202	SLC38A5/ITGB1/SLC1A3/SLC7A1/SLC7A5/SLC43A1/SLC1A5/SLC47A1/SLC1A4/SLC38A4/SLC1A2	11	Basal-cell
GO:0018149	peptide cross-linking	8/1229	28/18870	0.000303781	0.008745	0.00711202	KRT1/KRT10/DSP/THBS1/KRT2/CSTA/SPRR2E/FN1	8	Basal-cell
GO:0001707	mesoderm formation	14/1229	75/18870	0.000303856	0.008745	0.00711202	ITGB4/ITGA3/WNT3/FGFR2/ITGB1/ITGA2/WLS/WNT3A/SMAD3/BMP4/EXT2/SCX/BMPR1A/ETV2	14	Basal-cell
GO:0001819	positive regulation of cytokine production	53/1229	499/18870	0.000305779	0.00875451	0.00711975	POSTN/WNT3A/SMAD3/APP/TGFB1/IRF1/ALOX15B/SPON2/SLC7A5/CD276/SERPINB7/GSDMD/IL20RB/IL1RAP/IFNGR1/FERMT1/THBS1/PRG2/SORL1/TRIM16/CX3CL1/BTN3A1/PTPRC/HIF1A/TREM2/AKAP12/ADORA2B/KIT/PLA2R1/SAA1/HLA-DPA1/PTAFR/IL33/HLA-DPB1/ARID5A/LPL/IL16/MYB/BMPR1A/CD36/PANX1/CARD9/GPSM3/UCN/BATF/TYROBP/PIK3CG/CD83/NFAM1/SPN/AGPAT2/HAVCR2/BRCA1	53	Basal-cell
GO:0110110	positive regulation of animal organ morphogenesis	9/1229	35/18870	0.000308426	0.00878456	0.00714419	WNT4/SPRY1/EDN1/GDNF/BMP2/NGFR/BMP4/SOX9/PRKCB	9	Basal-cell
GO:0098661	inorganic anion transmembrane transport	20/1229	131/18870	0.000311125	0.00881574	0.00716954	SLC12A4/SLC1A3/SLC20A2/VDR/ANO1/CLCC1/ANKH/OCA2/BEST1/SLC1A4/SLC6A1/CLCA4/CLCN2/CLIC3/SLC26A6/GABRD/GABRA4/CLDN4/TTYH2/APOL1	20	Basal-cell
GO:0072001	renal system development	38/1229	324/18870	0.000319045	0.0089938	0.00731436	ASS1/ITGA3/DLL1/FGFR2/PDGFA/LAMA5/NOTCH3/TP73/DLG5/SMAD3/HES1/WNT4/SERPINF1/SPRY1/AP2B1/PPP3CA/PTK7/SERPINB7/GPC3/GDNF/DACT2/BMP2/EDNRA/HPGD/PLXND1/BMP4/MEF2C/ADAMTS1/EDNRB/GLI2/NOTCH2/COL4A1/NPNT/LRP2/SOX9/WNT9B/FMN1/PKHD1	38	Basal-cell
GO:0045216	cell-cell junction organization	28/1229	214/18870	0.000332061	0.00919853	0.00748086	CDH13/FLNA/SNAI2/PKP1/DLG5/CCM2/SMAD3/DSP/TGFB1/HOPX/CDH22/DSG1/GRHL1/DSG2/CLDN8/CDH8/FBF1/TJP1/CLDN1/NLGN4X/PKP2/LIMS2/POF1B/PLEKHA7/GJB1/PKHD1/CLDN4/MARVELD3	28	Basal-cell
GO:0015909	long-chain fatty acid transport	13/1229	67/18870	0.000333001	0.00919853	0.00748086	SLC2A1/APOE/PLIN2/SLC27A6/SLC27A1/BDKRB2/THBS1/ACSL1/PLA2R1/FABP5/SLC27A4/SLC27A5/CD36	13	Basal-cell
GO:0048645	animal organ formation	13/1229	67/18870	0.000333001	0.00919853	0.00748086	TP63/FGFR2/HES1/NTF4/SPRY1/SMARCD3/GDNF/BMP2/EMP2/BMP4/MEF2C/LRP2/BMPR1A	13	Basal-cell
GO:0071300	cellular response to retinoic acid	13/1229	67/18870	0.000333001	0.00919853	0.00748086	WNT3/FGFR2/WNT3A/ABCA1/TNC/SERPINF1/PTK7/WNT5B/BRINP1/MYB/SOX9/WNT9B/FZD4	13	Basal-cell
GO:0000819	sister chromatid segregation	29/1229	225/18870	0.000338644	0.00930762	0.00756958	FLNA/SMARCD3/BCL7A/ARHGEF10/KIF18B/TOP2A/TACC3/PSRC1/NCAPH/TTK/KIF23/CDC20/SPC25/KIFC2/NUF2/NDC80/CDCA8/SPC24/KAT2B/UBE2C/KIFC1/BUB1B/SPAG5/KIF25/CDK1/KIF14/NUSAP1/MYBL2/PRC1	29	Basal-cell
GO:0034349	glial cell apoptotic process	6/1229	16/18870	0.000342242	0.00935973	0.00761196	DLL1/CCL2/GAS6/TREM2/AKAP12/TNFRSF21	6	Basal-cell
GO:0016331	morphogenesis of embryonic epithelium	22/1229	152/18870	0.000346374	0.00939266	0.00763874	JAG2/TP63/FGFR2/LAMA5/WNT4/TGFB1/PTK7/CELSR1/ST14/GRHL3/RGMA/GDNF/IFT172/WNT16/HIF1A/BMP4/FZD6/DLC1/LRP2/KIF20B/SOX9/WNT9B	22	Basal-cell
GO:0001822	kidney development	37/1229	314/18870	0.000346936	0.00939266	0.00763874	ASS1/ITGA3/DLL1/FGFR2/PDGFA/LAMA5/NOTCH3/TP73/DLG5/SMAD3/HES1/WNT4/SERPINF1/SPRY1/AP2B1/PPP3CA/PTK7/SERPINB7/GPC3/GDNF/DACT2/BMP2/EDNRA/HPGD/PLXND1/BMP4/MEF2C/ADAMTS1/EDNRB/GLI2/NOTCH2/NPNT/LRP2/SOX9/WNT9B/FMN1/PKHD1	37	Basal-cell
GO:0035313	wound healing, spreading of epidermal cells	7/1229	22/18870	0.000349787	0.00939266	0.00763874	ITGB1/AJUBA/WNT7A/COL5A1/PHLDB2/FERMT1/LRG1	7	Basal-cell
GO:0051145	smooth muscle cell differentiation	14/1229	76/18870	0.000350493	0.00939266	0.00763874	FGFR2/HES1/WNT4/SMARCD3/EDNRA/PIAS1/BMP4/MEF2C/KIT/EDNRB/HEY1/NPNT/SOX9/NFATC2	14	Basal-cell
GO:0001755	neural crest cell migration	12/1229	59/18870	0.000354879	0.00939266	0.00763874	LAMA5/EFNB1/EDN1/GDNF/EDNRA/KITLG/HIF1A/BMP4/SOX10/EDNRB/ANXA6/FN1	12	Basal-cell
GO:0014009	glial cell proliferation	12/1229	59/18870	0.000354879	0.00939266	0.00763874	ASCL2/NFIB/HES1/SLC7A5/ETV5/IL34/CX3CL1/AREG/TREM2/SOX10/IL33/MYB	12	Basal-cell
GO:0048041	focal adhesion assembly	15/1229	85/18870	0.000355407	0.00939266	0.00763874	ITGA2/AJUBA/COL16A1/SMAD3/WNT4/TRIP6/PTPRK/PHLDB2/ACTN1/THBS1/DLC1/APOD/DMTN/STON1/FMN1	15	Basal-cell
GO:0050680	negative regulation of epithelial cell proliferation	24/1229	173/18870	0.000363741	0.0095669	0.00778044	FGFR2/MIR205/SNAI2/NFIB/APOE/CAV2/CCL2/TGFB1/SERPINF1/VDR/PTPRK/RUNX3/GPC3/NGFR/THBS1/IFT172/PTPRM/BMP4/MEF2C/NKX2-8/LIMS2/SOX9/MMRN2/MARVELD3	24	Basal-cell
GO:0030282	bone mineralization	19/1229	123/18870	0.000373979	0.00978933	0.00796134	FGFR2/ASPN/SMAD3/WNT4/SLC20A2/VDR/GPC3/ATP2B1/ANKH/BMP2/ROR2/HIF1A/BMP4/MEF2C/SRGN/BMPR1A/SOX9/COL1A2/SLC24A3	19	Basal-cell
GO:0030336	negative regulation of cell migration	42/1229	373/18870	0.000380033	0.00986847	0.0080257	DCN/MIR205/IFITM1/APOE/TIMP1/CCL2/DLG5/WNT4/TGFB1/ADIPOR1/ALOX15B/SERPINF1/MITF/HOXA7/PTPRK/CNN2/PHLDB2/RRAS/MMP28/NGFR/THBS1/SPRED1/PTPRM/IGFBP3/CX3CL1/CARD10/BMP4/ZEB2/MEF2C/DLC1/IL24/EVL/APOD/ARHGAP4/IL33/ARHGDIB/MIR493/BMPR1A/SRGAP2/PADI2/MMRN2/MARVELD3	42	Basal-cell
GO:0030048	actin filament-based movement	20/1229	133/18870	0.000381348	0.00986847	0.0080257	FLNA/PDPN/DSP/KCNJ2/MYH14/EMP2/SCN4B/DSG2/EPDR1/ZEB2/BIN1/SYNE2/MYO5C/PKP2/SGCD/KCNE4/GSN/WIPF1/KCNN2/MYO5B	20	Basal-cell
GO:0000070	mitotic sister chromatid segregation	25/1229	184/18870	0.000382388	0.00986847	0.0080257	FLNA/ARHGEF10/KIF18B/PSRC1/NCAPH/TTK/KIF23/CDC20/SPC25/KIFC2/NUF2/NDC80/CDCA8/SPC24/KAT2B/UBE2C/KIFC1/BUB1B/SPAG5/KIF25/CDK1/KIF14/NUSAP1/MYBL2/PRC1	25	Basal-cell
GO:0034350	regulation of glial cell apoptotic process	5/1229	11/18870	0.000385472	0.00990159	0.00805263	DLL1/CCL2/GAS6/TREM2/AKAP12	5	Basal-cell
GO:0071711	basement membrane organization	9/1229	36/18870	0.000387703	0.00991258	0.00806157	PHLDB1/ITGB1/CAV2/PHLDB2/FERMT1/LAMC1/PLOD3/COL4A1/HMCN1	9	Basal-cell
GO:0003401	axis elongation	8/1229	29/18870	0.000395751	0.0100672	0.0081873	FGFR2/WNT3A/TNC/SPRY1/PTK7/AREG/BMP4/SOX9	8	Basal-cell
GO:0055001	muscle cell development	26/1229	195/18870	0.000397413	0.0100672	0.0081873	ITGB1/MEF2A/GPX1/TNNT1/FHL2/CAV2/MYL9/HES1/MYOM2/PPP3CA/EDN1/ACTN1/EDNRA/NEBL/TNNT3/CACNB4/BMP4/WFIKKN2/BIN1/TMOD1/DMD/SGCD/CAPN3/BMPR1A/CDK1/NFATC2	26	Basal-cell
GO:0048332	mesoderm morphogenesis	14/1229	77/18870	0.000403117	0.0101648	0.00826671	ITGB4/ITGA3/WNT3/FGFR2/ITGB1/ITGA2/WLS/WNT3A/SMAD3/BMP4/EXT2/SCX/BMPR1A/ETV2	14	Basal-cell
GO:0006936	muscle contraction	40/1229	351/18870	0.000406548	0.0102045	0.00829902	FLNA/ITGA2/TNNT1/GAMT/SLC6A8/MYL9/DSP/KCNJ2/NMU/MYOM2/TNNI2/EDN1/BDKRB2/MYH14/GDNF/ATP2B1/SCN4B/EDNRA/EDN2/TNNT3/DSG2/ADORA2B/KIT/BIN1/EDNRB/TMOD1/DMD/PKP2/PTAFR/TRIM63/SGCD/KCNE4/NPNT/TPM2/CALM3/GSN/ANXA6/KCNN2/UCN/PIK3CG	40	Basal-cell
GO:0045446	endothelial cell differentiation	19/1229	124/18870	0.000415217	0.0103748	0.00843746	DLL1/COL18A1/PDPN/NRG1/GPX1/CCM2/MET/RAPGEF1/GSTM3/EDNRA/BMP4/PLOD3/TJP1/EDNRB/CLDN1/HEY1/ETV2/FZD4/S1PR3	19	Basal-cell
GO:0031214	biomineral tissue development	24/1229	175/18870	0.000431732	0.0107386	0.00873334	FGFR2/WLS/ASPN/SMAD3/WNT4/TGFB1/SLC20A2/VDR/GAS6/GPC3/ATP2B1/ANKH/BMP2/ROR2/HIF1A/BMP4/MEF2C/TSPEAR/HEY1/SRGN/BMPR1A/SOX9/COL1A2/SLC24A3	24	Basal-cell
GO:0007179	transforming growth factor beta receptor signaling pathway	29/1229	229/18870	0.000454765	0.0112606	0.00915783	ITGA3/DKK3/HTRA1/LTBP4/LTBP2/CAV2/ASPN/SMAD3/SPRED2/TGFB1/SPRY1/ZYX/PTPRK/ITGB8/FERMT1/SDCBP/BMP2/THBS1/SPRED1/HPGD/ZEB2/WFIKKN2/VEPH1/LRG1/PMEPA1/NPNT/BMPR1A/LPXN/COL1A2	29	Basal-cell
GO:0001952	regulation of cell-matrix adhesion	19/1229	125/18870	0.000460345	0.011299	0.00918913	CDH13/POSTN/COL16A1/SMAD3/WNT4/DDR1/HOXA7/PHLDB2/FERMT1/EMP2/RRAS/THBS1/CX3CL1/DLC1/APOD/DMTN/CD36/FMN1/PKHD1	19	Basal-cell
GO:0048708	astrocyte differentiation	15/1229	87/18870	0.00046043	0.011299	0.00918913	DLL1/APP/HES1/IFNGR1/BMP2/NR1D1/VIM/ROR2/ZEB2/TREM2/BIN1/PLP1/SOX9/MAPT/TSPAN2	15	Basal-cell
GO:0046165	alcohol biosynthetic process	21/1229	145/18870	0.000463341	0.0113199	0.00920612	MOXD1/DKK3/APOE/WNT4/LPCAT3/BMP2/PCBD1/SRD5A3/FDFT1/ACER3/DHCR24/CLCN2/PTAFR/ISYNA1/ASAH1/CES1/HMGCR/HRH1/SREBF2/ACAA2/TM7SF2	21	Basal-cell
GO:0071636	positive regulation of transforming growth factor beta production	7/1229	23/18870	0.000474736	0.011547	0.00939079	SMAD3/SERPINB7/FERMT1/THBS1/CX3CL1/MYB/BMPR1A	7	Basal-cell
GO:0032526	response to retinoic acid	17/1229	106/18870	0.000478594	0.0115694	0.00940901	WNT3/FGFR2/WNT3A/ABCA1/TNC/SERPINF1/PTK7/WNT5B/RXRG/TRIM16/BRINP1/MMP2/MYB/IGFBP7/SOX9/WNT9B/FZD4	17	Basal-cell
GO:0140014	mitotic nuclear division	33/1229	274/18870	0.000479866	0.0115694	0.00940901	FLNA/NFIB/CAV2/EDN1/ARHGEF10/KIF18B/LRP5/TOM1L2/BMP4/PSRC1/NCAPH/TTK/KIF23/ANLN/CDC20/SPC25/KIFC2/NUF2/NDC80/CDCA8/SPC24/KAT2B/UBE2C/KIFC1/BUB1B/SPAG5/KIF20B/KIF25/CDK1/KIF14/NUSAP1/MYBL2/PRC1	33	Basal-cell
GO:0070306	lens fiber cell differentiation	9/1229	37/18870	0.000483028	0.0115948	0.00942965	SMAD3/WNT7A/SPRED2/SPRY1/VIM/WNT5B/SPRED1/TMOD1/HSF4	9	Basal-cell
GO:0015908	fatty acid transport	18/1229	116/18870	0.000498837	0.0118873	0.00966757	SLC2A1/SLCO2A1/APOE/PLIN2/SLC27A6/EDN1/SLC27A1/BDKRB2/SLC43A3/THBS1/CRABP2/ACSL1/PLA2R1/FABP5/SLC27A4/CRABP1/SLC27A5/CD36	18	Basal-cell
GO:0032905	transforming growth factor beta1 production	6/1229	17/18870	0.000499893	0.0118873	0.00966757	TSKU/LAPTM4B/SERPINB7/THBS1/CX3CL1/TYROBP	6	Basal-cell
GO:0045165	cell fate commitment	34/1229	286/18870	0.000503737	0.0118873	0.00966757	JAG2/WNT3/DLL1/FGFR2/ITGB1/PDPN/NOTCH3/WNT10A/NFIB/WNT3A/WNT7A/HES1/WNT4/MITF/EDN1/ETS2/FOXN1/EPAS1/CDON/BMP2/WNT5B/EDNRA/TENM4/WNT16/BMP4/MEF2C/GLI2/NOTCH2/SOSTDC1/BMPR1A/SOX9/WNT9B/BATF/SPN	34	Basal-cell
GO:0045664	regulation of neuron differentiation	26/1229	198/18870	0.000503865	0.0118873	0.00966757	DLL1/ITGB1/NOTCH3/TP73/WNT3A/APP/HES1/TCF4/TGIF2/NTF4/ETV5/CDON/BMP2/MAP1B/BMP4/MEF2C/S100B/BRINP1/BIN1/EDNRB/WDR62/HEY1/SOX9/NTF3/DUOXA1/SOCS2	26	Basal-cell
GO:0010466	negative regulation of peptidase activity	20/1229	137/18870	0.00056412	0.013252	0.0107774	SERPINH1/GPX1/TIMP1/CST3/SERPINF1/SERPINB7/GAS6/SERPINB6/SERPING1/TIMP2/THBS1/DHCR24/SORL1/CSTB/BIN1/CSN2/IFI6/CSTA/SERPINB12/SERPINA12	20	Basal-cell
GO:1903053	regulation of extracellular matrix organization	12/1229	62/18870	0.000571675	0.0133723	0.0108753	ANTXR1/PHLDB1/PDPN/SMAD3/CST3/TGFB1/DDR1/PHLDB2/BMP2/LAMC1/AEBP1/SOX9	12	Basal-cell
GO:0003205	cardiac chamber development	23/1229	168/18870	0.000576972	0.0133823	0.0108834	FGFR2/NRG1/FHL2/DSP/HES1/TGFB1/AP2B1/PTK7/SMARCD3/BMP2/EDNRA/PLXND1/HIF1A/BMP4/MEF2C/ADAMTS1/DNAH11/NOTCH2/PKP2/HEY1/LRP2/BMPR1A/ZFPM2	23	Basal-cell
GO:0007156	homophilic cell adhesion via plasma membrane adhesion molecules	23/1229	168/18870	0.000576972	0.0133823	0.0108834	CDH13/CLSTN1/ITGB1/NPTN/PTK7/PCDH7/FAT1/CELSR1/IGSF9/CDH22/DSG1/PTPRM/DSG2/EMB/CDH8/DSC1/L1CAM/SDK2/DSC3/PCDHGA7/CADM3/HMCN1/PCDHB5	23	Basal-cell
GO:0003208	cardiac ventricle morphogenesis	13/1229	71/18870	0.000598739	0.0138289	0.0112466	FGFR2/NRG1/DSP/TGFB1/SMARCD3/EDNRA/HIF1A/MEF2C/PKP2/HEY1/LRP2/BMPR1A/ZFPM2	13	Basal-cell
GO:0085029	extracellular matrix assembly	10/1229	46/18870	0.00062436	0.0142655	0.0116017	ANTXR1/PHLDB1/SMAD3/TGFB1/THSD4/GAS6/PHLDB2/PLOD3/SOX9/COL1A2	10	Basal-cell
GO:0042487	regulation of odontogenesis of dentin-containing tooth	5/1229	12/18870	0.000625431	0.0142655	0.0116017	WNT10A/BMP2/NGFR/BMP4/PRKCB	5	Basal-cell
GO:1901203	positive regulation of extracellular matrix assembly	5/1229	12/18870	0.000625431	0.0142655	0.0116017	PHLDB1/SMAD3/TGFB1/PHLDB2/SOX9	5	Basal-cell
GO:0072273	metanephric nephron morphogenesis	7/1229	24/18870	0.000632823	0.0143745	0.0116903	HES1/WNT4/GDNF/BMP4/SOX9/WNT9B/FMN1	7	Basal-cell
GO:0046822	regulation of nucleocytoplasmic transport	17/1229	109/18870	0.000665599	0.0150568	0.0122452	FLNA/PTPN14/SMAD3/TGFB1/CHP2/GAS6/FERMT1/BMP4/MX2/APOD/HCLS1/EFCAB7/CD36/CDK1/XPO4/CHP1/RANGAP1	17	Basal-cell
GO:0030858	positive regulation of epithelial cell differentiation	13/1229	72/18870	0.000687832	0.015496	0.0126023	TP73/ALOX15B/VDR/FOXN1/GDNF/BMP2/SULT2B1/TRIM16/BMP4/IL20/ETV4/SOX9/ETV2	13	Basal-cell
GO:0042098	T cell proliferation	27/1229	213/18870	0.00069215	0.0155296	0.0126297	PRNP/LMO1/DLG5/SLC7A1/HES1/LGALS9B/WNT4/IRF1/EFNB1/CD151/PPP3CA/CD276/CBLB/IL20RB/LGALS9C/KITLG/BTN3A1/PTPRC/BMP4/TNFRSF21/HLA-DPA1/HLA-DPB1/LGALS3/PIK3CG/SPN/FYN/HAVCR2	27	Basal-cell
GO:0007219	Notch signaling pathway	24/1229	181/18870	0.000706889	0.0157731	0.0128277	JAG2/DLL1/TP63/POSTN/NOTCH3/DLK2/SNAI2/LFNG/APP/HES1/PSEN2/BMP2/NRARP/IFT172/TSPEAR/KIT/CNTN1/NOTCH2/HEY1/SOX9/SREBF2/TSPAN15/ETV2/S1PR3	24	Basal-cell
GO:0042481	regulation of odontogenesis	6/1229	18/18870	0.000708743	0.0157731	0.0128277	WNT10A/EDN1/BMP2/NGFR/BMP4/PRKCB	6	Basal-cell
GO:0034446	substrate adhesion-dependent cell spreading	16/1229	100/18870	0.000712311	0.0157886	0.0128403	ANTXR1/FLNA/POSTN/LAMA5/PDPN/LAMC1/PREX1/PKP2/FERMT3/DMTN/LIMS2/LPXN/SRGAP2/KIF14/FZD4/FN1	16	Basal-cell
GO:0007612	learning	21/1229	150/18870	0.000730784	0.016133	0.0131204	ITGB1/APP/NTRK2/TPBG/GRIN2A/PIAS1/TUBA1A/NLGN4Y/UBA6/SLC6A1/PDE1B/HIF1A/KIT/NLGN4X/HMGCR/HRH1/NRXN3/UCN/MEIS2/BCHE/FYN	21	Basal-cell
GO:0048738	cardiac muscle tissue development	30/1229	247/18870	0.000738173	0.0162164	0.0131882	DLL1/FGFR2/ITGB1/MEF2A/NRG1/TP73/FHL2/WNT3A/DSP/TGFB1/EDN1/HOPX/BMP2/EDNRA/NEBL/DSG2/TENM4/JPH2/BMP4/MEF2C/ERBB3/NOTCH2/PKP2/SGCD/HEY1/LRP2/BMPR1A/CDK1/ZFPM2/MIR25	30	Basal-cell
GO:1902476	chloride transmembrane transport	17/1229	110/18870	0.00074046	0.0162164	0.0131882	SLC12A4/SLC1A3/ANO1/CLCC1/OCA2/BEST1/SLC1A4/SLC6A1/CLCA4/CLCN2/CLIC3/SLC26A6/GABRD/GABRA4/CLDN4/TTYH2/APOL1	17	Basal-cell
GO:0042311	vasodilation	10/1229	47/18870	0.000747448	0.0163045	0.0132599	GPX1/APOE/BDKRB2/PLOD3/EXT2/ADORA2B/EDNRB/KAT2B/VSTM4/UCN	10	Basal-cell
GO:0007052	mitotic spindle organization	19/1229	130/18870	0.000755414	0.0164131	0.0133482	FLNA/GPSM2/ARHGEF10/TACC3/PSRC1/TTK/KIF23/CDC20/SPC25/KIFC2/NUF2/NDC80/CDCA8/PARP3/WDR62/EFHC1/KIFC1/MYBL2/PRC1	19	Basal-cell
GO:0001885	endothelial cell development	12/1229	64/18870	0.000770731	0.01668	0.0135653	COL18A1/GPX1/CCM2/MET/RAPGEF1/GSTM3/EDNRA/PLOD3/TJP1/EDNRB/CLDN1/S1PR3	12	Basal-cell
GO:0036465	synaptic vesicle recycling	14/1229	82/18870	0.00077893	0.0167913	0.0136558	SYT8/WNT3A/WNT7A/AP2B1/NLGN4Y/ITSN1/BIN1/STON2/NLGN4X/SYNJ2/SYT7/STON1/SNCG/DNAJC6	14	Basal-cell
GO:0033157	regulation of intracellular protein transport	28/1229	226/18870	0.0008001	0.0171803	0.0139721	FLNA/PRNP/PTPN14/SMAD3/TGFB1/BAP1/CHP2/GAS6/FERMT1/SVIP/RUFY3/SORL1/BMP4/BAG4/APOD/HCLS1/DMTN/EFCAB7/PTPN1/KIF20B/CD36/CDK1/SREBF2/XPO4/CHP1/MIEF1/RANGAP1/FYN	28	Basal-cell
GO:0006820	monoatomic anion transport	23/1229	172/18870	0.000803551	0.0171872	0.0139778	PRNP/SLC12A4/SLC39A14/SLC1A3/ANO1/ABCC3/CLCC1/OCA2/LRRC8D/BEST1/SLC1A4/SLC6A1/CLCA4/CLCN2/SLC1A2/CLIC3/SLC26A6/GABRD/ABCC2/GABRA4/CLDN4/TTYH2/APOL1	23	Basal-cell
GO:1902894	negative regulation of miRNA transcription	7/1229	25/18870	0.000829939	0.0176828	0.0143809	NFIB/SMAD3/NCOR2/TGFB1/HIF1A/BMP4/SOX9	7	Basal-cell
GO:0030857	negative regulation of epithelial cell differentiation	11/1229	56/18870	0.000842875	0.0178203	0.0144927	DLL1/TP63/SPRED2/HES1/SPRY1/HOXA7/SPRED1/CCND1/FST/SOX9/S1PR3	11	Basal-cell
GO:0070542	response to fatty acid	11/1229	56/18870	0.000842875	0.0178203	0.0144927	ASS1/HES1/EDN1/SCD/ACSL1/CLDN1/PTAFR/LPL/CD36/SOX9/OR51E2	11	Basal-cell
GO:2000146	negative regulation of cell motility	42/1229	388/18870	0.000849765	0.0178972	0.0145552	DCN/MIR205/IFITM1/APOE/TIMP1/CCL2/DLG5/WNT4/TGFB1/ADIPOR1/ALOX15B/SERPINF1/MITF/HOXA7/PTPRK/CNN2/PHLDB2/RRAS/MMP28/NGFR/THBS1/SPRED1/PTPRM/IGFBP3/CX3CL1/CARD10/BMP4/ZEB2/MEF2C/DLC1/IL24/EVL/APOD/ARHGAP4/IL33/ARHGDIB/MIR493/BMPR1A/SRGAP2/PADI2/MMRN2/MARVELD3	42	Basal-cell
GO:0051347	positive regulation of transferase activity	44/1229	414/18870	0.000944655	0.0198166	0.0161162	DBI/CCND2/FGFR2/PDGFA/PDGFC/PRNP/MST1R/NRG1/APOE/TGFB1/NTRK2/DDR1/MET/EDN1/GAS6/TNFRSF10B/EMP2/IL34/PKIB/THBS1/TRAF4/ROR2/ARHGEF5/SORL1/CDKN1A/PTPRC/CARD10/TREM2/ERBB3/KIT/GHR/PSRC1/CCND1/CDC20/UBE2C/CALM3/PTPN1/PIK3R6/NTF3/KIF14/PIK3CG/MAPT/ACD/PARN	44	Basal-cell
GO:0042475	odontogenesis of dentin-containing tooth	15/1229	93/18870	0.000948113	0.0198166	0.0161162	JAG2/TP63/LAMA5/WNT10A/KLK5/TNC/BMP2/NGFR/BMP4/GLI2/SOSTDC1/BMPR1A/FST/PRKCB/DLX3	15	Basal-cell
GO:0032341	aldosterone metabolic process	5/1229	13/18870	0.000962008	0.0200309	0.0162905	DKK3/WNT4/BMP2/EDNRB/CLCN2	5	Basal-cell
GO:0003158	endothelium development	20/1229	143/18870	0.00097879	0.0201278	0.0163693	DLL1/COL18A1/PDPN/NRG1/GPX1/CCM2/MET/RAPGEF1/GSTM3/SLC40A1/EDNRA/BMP4/PLOD3/TJP1/EDNRB/CLDN1/HEY1/ETV2/FZD4/S1PR3	20	Basal-cell
GO:0010885	regulation of cholesterol storage	6/1229	19/18870	0.00097916	0.0201278	0.0163693	ABCA1/TREM2/LPL/CES1/CD36/SREBF2	6	Basal-cell
GO:0060602	branch elongation of an epithelium	6/1229	19/18870	0.00097916	0.0201278	0.0163693	FGFR2/TNC/SPRY1/AREG/BMP4/SOX9	6	Basal-cell
GO:0046148	pigment biosynthetic process	11/1229	57/18870	0.000983951	0.0201278	0.0163693	OCA2/SLC25A38/SLC24A5/ZEB2/MC1R/COX10/DCT/TYR/PMEL/GPR143/TYRP1	11	Basal-cell
GO:0090092	regulation of transmembrane receptor protein serine/threonine kinase signaling pathway	34/1229	297/18870	0.000984971	0.0201278	0.0163693	ITGA3/DKK3/HTRA1/LTBP4/MIR205/CAV2/ASPN/SMAD3/SPRED2/HES1/TGFB1/SPRY1/GPC3/RGMA/FERMT1/SDCBP/DACT2/BMP2/TMPRSS6/THBS1/SPRED1/SORL1/BMP4/ZEB2/WFIKKN2/VEPH1/LRG1/NOTCH2/PMEPA1/SOSTDC1/NPNT/LRP2/BMPR1A/FST	34	Basal-cell
GO:0061041	regulation of wound healing	19/1229	133/18870	0.00100105	0.0203806	0.0165748	SMOC2/KRT1/PDGFA/ITGB1/APOE/SMAD3/WNT4/EDN1/PROS1/PHLDB2/FERMT1/SERPING1/THBS1/TNFRSF12A/CLDN1/DMTN/VKORC1/CD36/CLDN4	19	Basal-cell
GO:0060914	heart formation	8/1229	33/18870	0.00101446	0.0205774	0.0167349	HES1/SMARCD3/BMP2/EMP2/BMP4/MEF2C/LRP2/BMPR1A	8	Basal-cell
GO:1902905	positive regulation of supramolecular fiber organization	23/1229	175/18870	0.00102067	0.0206273	0.0167755	FLNA/GPX1/APOE/SMAD3/APP/WNT4/MET/SYNPO2/EDN1/ARHGEF10/CDC42EP4/MAP1B/ARHGEF5/CX3CL1/BIN1/EVL/BAG4/PSRC1/ARHGEF10L/SCIN/GSN/FMN1/MAPT	23	Basal-cell
GO:0061180	mammary gland epithelium development	12/1229	66/18870	0.0010246	0.0206309	0.0167784	WNT3/FGFR2/GPX1/WNT4/DDR1/VDR/LRP5/AREG/HIF1A/CCND1/SOSTDC1/IQGAP3	12	Basal-cell
GO:0001701	in utero embryonic development	42/1229	392/18870	0.0010407	0.0208785	0.0169798	JAG2/FGFR2/ITGB1/ASCL2/SH3PXD2A/RBBP8/WNT3A/CCM2/SMAD3/HES1/BAP1/LPAR6/EDN1/HOPX/ST14/EPAS1/RCN1/BMP2/UPF3A/PLCD3/EDNRA/HIF1A/PLOD3/RRM2/SOX10/SMG9/SEC24D/NOTCH2/APBA2/DSC3/STMN3/HEY1/BMPR1A/NECAB1/HS6ST1/FOXD3/ARNT2/ZFPM2/WNT9B/PLK4/ETV2/ST8SIA6	42	Basal-cell
GO:0006911	phagocytosis, engulfment	10/1229	49/18870	0.00105372	0.0209866	0.0170677	ITGA2/ABCA1/THBS1/RAB31/TREM2/GULP1/GSN/CD36/ELMO1/BIN2	10	Basal-cell
GO:0010171	body morphogenesis	10/1229	49/18870	0.00105372	0.0209866	0.0170677	WNT3/PHLDB1/PLEKHA1/PHLDB2/GPC3/CDON/RRAS/MMP2/SCX/CRISPLD1	10	Basal-cell
GO:1901654	response to ketone	26/1229	208/18870	0.00105997	0.0210349	0.017107	ASS1/POSTN/TGFB1/TXNIP/TNC/SERPINF1/EDN1/GAS6/DSG1/HOXA9/THBS1/SCNN1A/DSG2/CDKN1A/PTPRC/GNG2/FIBIN/SOX10/CLDN1/PTAFR/MAP4K1/TRERF1/IGFBP7/AHR/CARD9/CLDN4	26	Basal-cell
GO:0014706	striated muscle tissue development	31/1229	264/18870	0.00106749	0.0211078	0.0171663	DLL1/FGFR2/ITGB1/MEF2A/NRG1/TP73/FHL2/WNT3A/SMAD3/DSP/TGFB1/EDN1/HOPX/BMP2/EDNRA/NEBL/DSG2/TENM4/JPH2/BMP4/MEF2C/ERBB3/NOTCH2/PKP2/SGCD/HEY1/LRP2/BMPR1A/CDK1/ZFPM2/MIR25	31	Basal-cell
GO:2000629	negative regulation of miRNA metabolic process	7/1229	26/18870	0.00107248	0.0211117	0.0171695	NFIB/SMAD3/NCOR2/TGFB1/HIF1A/BMP4/SOX9	7	Basal-cell
GO:0048246	macrophage chemotaxis	9/1229	41/18870	0.00107537	0.0211117	0.0171695	CCL2/MMP28/IL34/THBS1/EDN2/EDNRB/SAA1/MMP2/LGALS3	9	Basal-cell
GO:0019218	regulation of steroid metabolic process	16/1229	104/18870	0.00110019	0.0215223	0.0175034	DKK3/SNAI2/APOE/WNT4/LPCAT3/BMP2/NR1D1/KIT/STAR/CLCN2/ASAH1/CES1/IGFBP7/EPHX2/SREBF2/SERPINA12	16	Basal-cell
GO:0008306	associative learning	14/1229	85/18870	0.00112232	0.0218773	0.0177921	ITGB1/APP/TPBG/GRIN2A/PIAS1/TUBA1A/SLC6A1/PDE1B/HIF1A/KIT/HMGCR/HRH1/UCN/MEIS2	14	Basal-cell
GO:0003229	ventricular cardiac muscle tissue development	11/1229	58/18870	0.00114397	0.0221422	0.0180075	FGFR2/NRG1/DSP/TGFB1/HOPX/EDNRA/DSG2/PKP2/LRP2/BMPR1A/ZFPM2	11	Basal-cell
GO:0099024	plasma membrane invagination	11/1229	58/18870	0.00114397	0.0221422	0.0180075	ITGA2/ABCA1/THBS1/RAB31/TREM2/GULP1/SNX33/GSN/CD36/ELMO1/BIN2	11	Basal-cell
GO:0052547	regulation of peptidase activity	35/1229	312/18870	0.00119736	0.0230943	0.0187818	SERPINH1/GPX1/MIR205/TIMP1/SMAD3/CST3/KHDC1/SERPINF1/SERPINB7/GAS6/SERPINB6/SERPING1/PMAIP1/NGFR/TIMP2/SOX7/GRIN2A/THBS1/A2ML1/DHCR24/SORL1/CSTB/DLC1/BIN1/CSN2/PRR7/IFI6/GSN/CSTA/SERPINB12/CARD9/MAPT/CLDN4/SERPINA12/FYN	35	Basal-cell
GO:0043086	negative regulation of catalytic activity	49/1229	480/18870	0.00120905	0.0232383	0.0188989	SERPINH1/GPX1/APOE/TIMP1/SLC39A14/CST3/SERPINF1/SPRY1/SERPINB7/CBLB/GAS6/SERPINB6/SERPING1/GNAQ/BMP2/TIMP2/PKIB/THBS1/SPRED1/LRP5/ERRFI1/DHCR24/GCHFR/PIK3IP1/SORL1/ANGPTL4/CDKN1A/CPEB2/CSTB/PTPRC/SORT1/BIN1/PLA2R1/CRY2/EDNRB/CSN2/PARP3/LGALS3/IFI6/PTPN1/CSTA/SERPINB12/CERS1/CHP1/HHEX/MAPT/SERPINA12/MIR711/DEPTOR	49	Basal-cell
GO:0030010	establishment of cell polarity	21/1229	156/18870	0.00121927	0.0233396	0.0189813	ITGB1/WNT7A/GPSM2/HES1/SPRY1/PTK7/FAT1/PHLDB2/FERMT1/RUFY3/MAP1B/FBF1/SIPA1L3/NDC80/CYTH3/GSN/SPAG5/KIF20B/KIF25/CENPA/PKHD1	21	Basal-cell
GO:0006935	chemotaxis	48/1229	468/18870	0.00122281	0.0233396	0.0189813	CDH13/CXCL14/WNT3/SMOC2/PDGFA/ITGA2/NRG1/ACKR3/WNT3A/CCL2/SMAD3/TGFB1/DEFB1/MET/EDN1/GAS6/TPBG/GDNF/LSP1/MMP28/IL34/THBS1/EDN2/LGR6/PLD1/ARHGEF5/CX3CL1/PLA2G7/PREX1/BMP4/ENPP2/TREM2/KIT/EDNRB/SAA1/L1CAM/PTAFR/MMP2/IL16/LGALS3/TUBB2B/GPSM3/NTF3/PADI2/PIK3CG/SPN/BIN2/CCL27	48	Basal-cell
GO:0007215	glutamate receptor signaling pathway	10/1229	50/18870	0.00124148	0.0235325	0.0191382	PRNP/APP/GNAQ/GRIN2A/CX3CL1/CPEB4/GRIK2/PLP1/TRPM1/FYN	10	Basal-cell
GO:0030850	prostate gland development	10/1229	50/18870	0.00124148	0.0235325	0.0191382	TP63/FGFR2/ALOX15B/TNC/SERPINF1/HOXA9/BMP4/MMP2/SOX9/PSAP	10	Basal-cell
GO:0007431	salivary gland development	8/1229	34/18870	0.00125182	0.0235659	0.0191654	FGFR2/PDGFA/LAMA5/SNAI2/NFIB/TGFB1/PLXND1/CLCN2	8	Basal-cell
GO:0048333	mesodermal cell differentiation	8/1229	34/18870	0.00125182	0.0235659	0.0191654	ITGB4/ITGA3/FGFR2/ITGB1/ITGA2/WNT3A/BMP4/BMPR1A	8	Basal-cell
GO:0007411	axon guidance	28/1229	233/18870	0.00128216	0.0239729	0.0194963	WNT3/NOTCH3/NFIB/WNT3A/APP/EFNB1/PTK7/IGSF9/EDN1/GDNF/PLXNC1/NGFR/CHL1/EDNRA/LGR6/PTPRM/EMB/PLXND1/RPS6KA5/CNTN1/GLI2/NOTCH2/L1CAM/TUBB3/TUBB2B/NRXN3/LHX4/FYN	28	Basal-cell
GO:0097485	neuron projection guidance	28/1229	233/18870	0.00128216	0.0239729	0.0194963	WNT3/NOTCH3/NFIB/WNT3A/APP/EFNB1/PTK7/IGSF9/EDN1/GDNF/PLXNC1/NGFR/CHL1/EDNRA/LGR6/PTPRM/EMB/PLXND1/RPS6KA5/CNTN1/GLI2/NOTCH2/L1CAM/TUBB3/TUBB2B/NRXN3/LHX4/FYN	28	Basal-cell
GO:0007498	mesoderm development	19/1229	136/18870	0.00131201	0.0244479	0.0198826	ITGB4/ITGA3/WNT3/TP63/FGFR2/ITGB1/ITGA2/WLS/WNT3A/SMAD3/ETS2/SECTM1/BMP4/EXT2/SCX/BMPR1A/ZFPM2/IKZF1/ETV2	19	Basal-cell
GO:1902001	fatty acid transmembrane transport	6/1229	20/18870	0.00132234	0.0245572	0.0199715	SLC2A1/SLC27A1/THBS1/ACSL1/SLC27A5/CD36	6	Basal-cell
GO:0042330	taxis	48/1229	470/18870	0.00133691	0.024744	0.0201235	CDH13/CXCL14/WNT3/SMOC2/PDGFA/ITGA2/NRG1/ACKR3/WNT3A/CCL2/SMAD3/TGFB1/DEFB1/MET/EDN1/GAS6/TPBG/GDNF/LSP1/MMP28/IL34/THBS1/EDN2/LGR6/PLD1/ARHGEF5/CX3CL1/PLA2G7/PREX1/BMP4/ENPP2/TREM2/KIT/EDNRB/SAA1/L1CAM/PTAFR/MMP2/IL16/LGALS3/TUBB2B/GPSM3/NTF3/PADI2/PIK3CG/SPN/BIN2/CCL27	48	Basal-cell
GO:0032760	positive regulation of tumor necrosis factor production	16/1229	106/18870	0.00135318	0.0249612	0.0203001	APP/TGFB1/SPON2/IFNGR1/THBS1/PTPRC/AKAP12/PTAFR/IL33/ARID5A/LPL/CD36/CARD9/TYROBP/SPN/HAVCR2	16	Basal-cell
GO:0006633	fatty acid biosynthetic process	22/1229	168/18870	0.00136201	0.0250401	0.0203643	PTGS1/CBR1/ALOX15B/EDN1/SCD/GSTM1/EDN2/ACOT7/SLC45A3/HACD2/TECRL/FADS1/FABP5/LPL/KAT2B/PLP1/FADS6/ELOVL6/FADS3/LOC344967/ABHD3/BRCA1	22	Basal-cell
GO:0050866	negative regulation of cell activation	27/1229	223/18870	0.00138736	0.0254211	0.0206741	PDGFA/PRNP/ASCL2/APOE/DLG5/LGALS9B/IRF1/CBLB/IL20RB/RUNX3/LGALS9C/NR1D1/NRARP/CX3CL1/PTPRC/BMP4/PGLYRP3/TREM2/TNFRSF21/PARP3/LGALS3/TNFAIP8L2/PAG1/TYROBP/SPN/FN1/HAVCR2	27	Basal-cell
GO:0008212	mineralocorticoid metabolic process	5/1229	14/18870	0.00141662	0.0258709	0.0210399	DKK3/WNT4/BMP2/EDNRB/CLCN2	5	Basal-cell
GO:0072175	epithelial tube formation	19/1229	137/18870	0.00143243	0.0260731	0.0212044	FGFR2/WNT4/TGFB1/PTK7/CELSR1/ST14/GRHL3/RGMA/GDNF/IFT172/HIF1A/BMP4/FZD6/DLC1/LRP2/KIF20B/SOX9/WNT9B/MMRN2	19	Basal-cell
GO:0040013	negative regulation of locomotion	44/1229	423/18870	0.00145242	0.0263497	0.0214293	WNT3/DCN/MIR205/IFITM1/WNT3A/APOE/TIMP1/CCL2/DLG5/WNT4/TGFB1/ADIPOR1/ALOX15B/SERPINF1/MITF/HOXA7/PTPRK/CNN2/PHLDB2/RRAS/MMP28/NGFR/THBS1/SPRED1/PTPRM/IGFBP3/CX3CL1/CARD10/BMP4/ZEB2/MEF2C/DLC1/IL24/EVL/APOD/ARHGAP4/IL33/ARHGDIB/MIR493/BMPR1A/SRGAP2/PADI2/MMRN2/MARVELD3	44	Basal-cell
GO:0015698	inorganic anion transport	22/1229	169/18870	0.00147192	0.0266156	0.0216456	SLC12A4/SLC1A3/SLC20A2/VDR/ANO1/CLCC1/ANKH/OCA2/BEST1/SLC1A4/SLC6A1/CLCA4/CRY2/CLCN2/CLIC3/SLC26A6/GABRD/GABRA4/SLC25A30/CLDN4/TTYH2/APOL1	22	Basal-cell
GO:0009636	response to toxic substance	30/1229	258/18870	0.00148686	0.0267976	0.0217936	ASS1/GPX1/PTGS1/APOE/SLC47A2/MT2A/GSTM3/MT1E/TXNDC17/GSTM1/RDH12/SLC47A1/MAP1B/AKR1B10/CDKN1A/SLC6A1/GPX8/SOD3/CLDN1/CES1/GPX6/MT1G/EPHX2/AHR/CD36/CDK1/CERS1/ALOX5AP/SNN/TPO	30	Basal-cell
GO:1901888	regulation of cell junction assembly	26/1229	213/18870	0.00149847	0.0269186	0.021892	THBS2/CLSTN1/SNAI2/WNT3A/COL16A1/DLG5/SMAD3/WNT7A/APP/WNT4/NTRK2/RAPGEF1/HOPX/IL1RAP/PHLDB2/TPBG/THBS1/SLITRK6/MEF2C/DLC1/TJP1/CLDN1/APOD/DMTN/SLITRK2/FMN1	26	Basal-cell
GO:0043406	positive regulation of MAP kinase activity	14/1229	88/18870	0.00158448	0.0283652	0.0230685	PDGFA/PDGFC/MST1R/TGFB1/EDN1/IL34/THBS1/ARHGEF5/KIT/GHR/PTPN1/PIK3R6/NTF3/PIK3CG	14	Basal-cell
GO:0006937	regulation of muscle contraction	22/1229	170/18870	0.00158932	0.0283652	0.0230685	ITGA2/TNNT1/MYL9/DSP/KCNJ2/NMU/EDN1/ATP2B1/EDN2/TNNT3/DSG2/ADORA2B/KIT/BIN1/DMD/PKP2/PTAFR/NPNT/CALM3/ANXA6/UCN/PIK3CG	22	Basal-cell
GO:0010951	negative regulation of endopeptidase activity	18/1229	128/18870	0.00161037	0.0286479	0.0232983	SERPINH1/GPX1/TIMP1/CST3/SERPINF1/SERPINB7/GAS6/SERPINB6/SERPING1/TIMP2/THBS1/DHCR24/SORL1/BIN1/CSN2/IFI6/SERPINB12/SERPINA12	18	Basal-cell
GO:0051896	regulation of phosphatidylinositol 3-kinase/protein kinase B signal transduction	29/1229	248/18870	0.00162078	0.02874	0.0233733	PDGFA/ITGB1/PDGFC/MST1R/GPX1/DCN/PLEKHA1/TGFB1/NTRK2/DDR1/GAS6/TPBG/RRAS/THBS1/WNT16/ROR2/PIK3IP1/CX3CL1/MC1R/TREM2/ERBB3/KIT/BAG4/HCLS1/LRP2/SOX9/PIK3CG/PKHD1/FN1	29	Basal-cell
GO:0048661	positive regulation of smooth muscle cell proliferation	15/1229	98/18870	0.00163653	0.0289261	0.0235246	CDH13/FGFR2/ITGA2/NOTCH3/TGFB1/EDN1/THBS1/HPGD/CX3CL1/BMP4/ADAMTS1/PTAFR/MMP2/MYB/BMPR1A	15	Basal-cell
GO:0007389	pattern specification process	48/1229	475/18870	0.00166402	0.0293178	0.0238432	WNT3/DLL1/TP63/IRX4/FGFR2/LAMA5/WLS/WNT3A/LFNG/SMAD3/WNT7A/HES1/NTF4/EFNB1/SPRY1/HES4/EDN1/SMARCD3/HOXA7/ETS2/GRHL3/GPC3/GDNF/CDON/HOXA9/BMP2/NRARP/IFT172/HOXB2/LRP5/HES2/HIF1A/BMP4/DNAAF3/MEF2C/DNAH11/GLI2/NOTCH2/HOXB4/HEY1/SOSTDC1/LRP2/BMPR1A/FST/TLL1/MEIS2/HHEX/ACD	48	Basal-cell
GO:0017015	regulation of transforming growth factor beta receptor signaling pathway	21/1229	160/18870	0.00168176	0.0294859	0.0239799	ITGA3/DKK3/HTRA1/LTBP4/CAV2/ASPN/SMAD3/SPRED2/TGFB1/SPRY1/FERMT1/SDCBP/BMP2/THBS1/SPRED1/ZEB2/WFIKKN2/VEPH1/LRG1/PMEPA1/NPNT	21	Basal-cell
GO:0019216	regulation of lipid metabolic process	37/1229	342/18870	0.00169316	0.0294859	0.0239799	DKK3/PDGFA/SNAI2/APOE/WNT4/TGFB1/ADIPOR1/HSD17B13/SLC27A1/LPCAT3/FMO1/BMP2/NR1D1/HPGD/PIK3IP1/SORL1/TREM2/LPCAT1/SLC45A3/KIT/FABP5/APOD/STAR/CLCN2/ASAH1/CES1/KAT2B/IGFBP7/EPHX2/SOX9/SREBF2/PSAP/PIK3CG/CHP1/MAPT/SERPINA12/BRCA1	37	Basal-cell
GO:0006636	unsaturated fatty acid biosynthetic process	10/1229	52/18870	0.00169882	0.0294859	0.0239799	PTGS1/CBR1/ALOX15B/EDN1/SCD/EDN2/FADS1/FABP5/ELOVL6/FADS3	10	Basal-cell
GO:0014850	response to muscle activity	7/1229	28/18870	0.00172186	0.0294859	0.0239799	POSTN/ITGA2/SLC7A5/METRNL/HIF1A/PERM1/CAPN3	7	Basal-cell
GO:0042398	cellular modified amino acid biosynthetic process	7/1229	28/18870	0.00172186	0.0294859	0.0239799	GAMT/BBOX1/SLC27A1/GATM/CKB/FPGS/PLOD3	7	Basal-cell
GO:0042759	long-chain fatty acid biosynthetic process	7/1229	28/18870	0.00172186	0.0294859	0.0239799	ALOX15B/GSTM1/ACOT7/FADS1/PLP1/ELOVL6/LOC344967	7	Basal-cell
GO:0045606	positive regulation of epidermal cell differentiation	7/1229	28/18870	0.00172186	0.0294859	0.0239799	ALOX15B/VDR/SULT2B1/TRIM16/BMP4/IL20/ETV4	7	Basal-cell
GO:1903055	positive regulation of extracellular matrix organization	7/1229	28/18870	0.00172186	0.0294859	0.0239799	PHLDB1/PDPN/SMAD3/TGFB1/PHLDB2/BMP2/SOX9	7	Basal-cell
GO:0048736	appendage development	23/1229	182/18870	0.00173227	0.0294859	0.0239799	ITGB4/WNT3/TP63/FGFR2/ITGA6/WNT7A/FOXN1/GPC3/KREMEN2/HOXA9/IFT172/CRABP2/LRP5/BMP4/FZD6/NOTCH2/KAT2B/SCX/BMPR1A/SOX9/FMN1/ACD/AFF3	23	Basal-cell
GO:0060173	limb development	23/1229	182/18870	0.00173227	0.0294859	0.0239799	ITGB4/WNT3/TP63/FGFR2/ITGA6/WNT7A/FOXN1/GPC3/KREMEN2/HOXA9/IFT172/CRABP2/LRP5/BMP4/FZD6/NOTCH2/KAT2B/SCX/BMPR1A/SOX9/FMN1/ACD/AFF3	23	Basal-cell
GO:0046651	lymphocyte proliferation	34/1229	307/18870	0.00173257	0.0294859	0.0239799	PRNP/LMO1/WNT3A/DLG5/SLC7A1/HES1/LGALS9B/WNT4/IRF1/EFNB1/CD151/PPP3CA/CD276/CBLB/IL20RB/LGALS9C/EMP2/KITLG/CDKN1A/BTN3A1/PTPRC/BMP4/MEF2C/TNFRSF21/HLA-DPA1/HLA-DPB1/LGALS3/AHR/NFATC2/TYROBP/PIK3CG/SPN/FYN/HAVCR2	34	Basal-cell
GO:1902893	regulation of miRNA transcription	12/1229	70/18870	0.00174236	0.029561	0.024041	NFIB/SMAD3/NCOR2/TGFB1/BMP2/NGFR/HIF1A/BMP4/MYB/BMPR1A/SOX9/SREBF2	12	Basal-cell
GO:1901201	regulation of extracellular matrix assembly	6/1229	21/18870	0.00175024	0.0296032	0.0240753	ANTXR1/PHLDB1/SMAD3/TGFB1/PHLDB2/SOX9	6	Basal-cell
GO:0003179	heart valve morphogenesis	11/1229	61/18870	0.00175698	0.0296246	0.0240927	SNAI2/TGFB1/BMP2/BMP4/MEF2C/NOTCH2/HEY1/SCX/BMPR1A/ADAMTS5/SOX9	11	Basal-cell
GO:0050670	regulation of lymphocyte proliferation	28/1229	238/18870	0.00176489	0.0296246	0.0240927	PRNP/LMO1/WNT3A/DLG5/SLC7A1/HES1/LGALS9B/IRF1/EFNB1/PPP3CA/CD276/CBLB/IL20RB/LGALS9C/KITLG/CDKN1A/PTPRC/BMP4/MEF2C/TNFRSF21/HLA-DPA1/HLA-DPB1/LGALS3/AHR/NFATC2/TYROBP/SPN/HAVCR2	28	Basal-cell
GO:0043542	endothelial cell migration	32/1229	284/18870	0.00176767	0.0296246	0.0240927	CDH13/SMOC2/ITGB1/GPX1/DCN/MIR205/SNAI2/APOE/S100A2/WNT7A/GLUL/TGFB1/MET/SERPINF1/EDN1/ANXA3/EMP2/RRAS/THBS1/EDN2/SPRED1/PTPRM/PLXND1/PRSS3/CARD10/HIF1A/ZEB2/MEF2C/VSTM4/LPXN/PIK3CG/MMRN2	32	Basal-cell
GO:0003012	muscle system process	46/1229	452/18870	0.00178613	0.0298431	0.0242704	FLNA/ITGA2/MEF2A/TNNT1/GAMT/SLC6A8/MYL9/SMAD3/DSP/KCNJ2/NMU/MYOM2/PPP3CA/TNNI2/EDN1/BDKRB2/MYH14/GDNF/ATP2B1/GATM/SCN4B/EDNRA/EDN2/TNNT3/DSG2/ADORA2B/KIT/BIN1/EDNRB/TMOD1/DMD/PKP2/PTAFR/TRIM63/SGCD/KCNE4/NPNT/TPM2/CALM3/GSN/ANXA6/KCNN2/MIR25/UCN/PIK3CG/CAMK2B	46	Basal-cell
GO:0010463	mesenchymal cell proliferation	9/1229	44/18870	0.00182528	0.0303129	0.0246524	FGFR2/PDGFA/NFIB/GPC3/BMP2/LRP5/BMP4/BMPR1A/SOX9	9	Basal-cell
GO:0030501	positive regulation of bone mineralization	9/1229	44/18870	0.00182528	0.0303129	0.0246524	SMAD3/WNT4/SLC20A2/VDR/ATP2B1/BMP2/BMP4/MEF2C/BMPR1A	9	Basal-cell
GO:0050803	regulation of synapse structure or activity	29/1229	250/18870	0.00183154	0.0303252	0.0246624	THBS2/CLSTN1/ITGB1/PRNP/WNT3A/APOE/DLG5/WNT7A/APP/NTRK2/IGSF9/NGEF/IL1RAP/TPBG/PLXNC1/TUBA1A/ROR2/CDH8/SLITRK6/MEF2C/TREM2/RPS6KA5/CDC20/ARHGAP22/SRGN/SYBU/SLITRK2/CAMK2B/FYN	29	Basal-cell
GO:0010092	specification of animal organ identity	8/1229	36/18870	0.0018581	0.0304188	0.0247386	FGFR2/SPRY1/SMARCD3/GDNF/BMP2/BMP4/MEF2C/LRP2	8	Basal-cell
GO:0035137	hindlimb morphogenesis	8/1229	36/18870	0.0018581	0.0304188	0.0247386	WNT3/TP63/WNT7A/GPC3/BMP4/BMPR1A/FMN1/AFF3	8	Basal-cell
GO:0046578	regulation of Ras protein signal transduction	23/1229	183/18870	0.00186232	0.0304188	0.0247386	ITGA3/ITGB1/APOE/ABCA1/RGL2/MET/AUTS2/SPRY1/LPAR6/KITLG/NET1/ARHGEF28/DLC1/KCTD10/NOTCH2/STMN3/CYTH3/PSD3/ARHGDIB/FOXM1/KIF14/PIK3CG/EPS8L1	23	Basal-cell
GO:0006869	lipid transport	46/1229	453/18870	0.00186633	0.0304188	0.0247386	DBI/SLC2A1/GLTP/LIMA1/LCAT/SLCO2A1/APOE/TSKU/ABCA1/PLIN2/SLC27A6/EDN1/SLC27A1/BDKRB2/LPCAT3/SLC43A3/ABCC3/SIGMAR1/THBS1/CRABP2/ACSL1/ABCA8/TREM2/GULP1/PLA2R1/CRY2/ATP10B/FABP5/APOD/STAR/SLC27A4/ATP10A/CRABP1/CES1/APOBR/MYB/SLC27A5/CD36/SYT7/SREBF2/APOL4/PSAP/ABCC2/FZD4/OSBPL7/APOL1	46	Basal-cell
GO:0048568	embryonic organ development	46/1229	453/18870	0.00186633	0.0304188	0.0247386	EFEMP1/DLL1/FGFR2/PDGFA/COL18A1/ASCL2/WNT3A/SMAD3/HES1/TGFB1/PTK7/EDN1/HOXA7/ST14/EPAS1/GRHL3/GDNF/HOXA9/PLCD3/IFT172/EDNRA/HOXB2/KITLG/WNT16/FLT3LG/ALX1/HIF1A/SLITRK6/BMP4/FZD6/MEF2C/TMIE/KIT/GLI2/NOTCH2/HOXB4/HEY1/TUBB2B/BMPR1A/HS6ST1/SOX9/ZFPM2/WNT9B/PLK4/STRC/TPO	46	Basal-cell
GO:0071900	regulation of protein serine/threonine kinase activity	32/1229	285/18870	0.00187039	0.0304188	0.0247386	CCND2/PDGFA/PDGFC/MST1R/APOE/TGFB1/SPRY1/EDN1/BMP2/IL34/PKIB/THBS1/LRP5/ARHGEF5/SORL1/CDKN1A/CCNG2/KIT/GHR/PSRC1/CCND1/CDKN3/BLM/CALM3/PTPN1/PIK3R6/NTF3/PIK3CG/KSR1/CDKN2C/HHEX/MIR711	32	Basal-cell
GO:0035148	tube formation	20/1229	151/18870	0.00191864	0.0311114	0.0253018	FGFR2/NFIB/WNT4/TGFB1/PTK7/CELSR1/ST14/GRHL3/RGMA/GDNF/IFT172/HIF1A/BMP4/FZD6/DLC1/LRP2/KIF20B/SOX9/WNT9B/MMRN2	20	Basal-cell
GO:0006665	sphingolipid metabolic process	21/1229	162/18870	0.00196414	0.0315592	0.025666	ALDH3B2/GLTP/ALDH3B1/ITGB8/SGPP2/ACER3/DEGS2/ENPP2/ABCA8/CERS3/KIT/HACD2/B4GALT6/ASAH1/PNPLA1/ELOVL6/CERS1/PSAP/FADS3/GAL3ST1/ST8SIA6	21	Basal-cell
GO:1902692	regulation of neuroblast proliferation	10/1229	53/18870	0.00197386	0.0315592	0.025666	ITGB1/SMARCD3/CDON/CX3CL1/HIF1A/BCAN/DCT/SOX10/WDR62/HAPLN3	10	Basal-cell
GO:0048488	synaptic vesicle endocytosis	12/1229	71/18870	0.00197496	0.0315592	0.025666	SYT8/AP2B1/NLGN4Y/ITSN1/BIN1/STON2/NLGN4X/SYNJ2/SYT7/STON1/SNCG/DNAJC6	12	Basal-cell
GO:0061614	miRNA transcription	12/1229	71/18870	0.00197496	0.0315592	0.025666	NFIB/SMAD3/NCOR2/TGFB1/BMP2/NGFR/HIF1A/BMP4/MYB/BMPR1A/SOX9/SREBF2	12	Basal-cell
GO:1902475	L-alpha-amino acid transmembrane transport	12/1229	71/18870	0.00197496	0.0315592	0.025666	SLC38A5/ITGB1/SLC1A3/SLC7A1/SLC7A5/SLC43A1/SLC1A5/SLC47A1/SLC25A38/SLC1A4/SLC38A4/SLC1A2	12	Basal-cell
GO:1903034	regulation of response to wounding	22/1229	173/18870	0.00199063	0.0315961	0.025696	FLNA/SMOC2/KRT1/PDGFA/ITGB1/APOE/SMAD3/WNT4/EDN1/PROS1/PHLDB2/RGMA/FERMT1/SERPING1/THBS1/TNFRSF12A/CLDN1/IL33/DMTN/VKORC1/CD36/CLDN4	22	Basal-cell
GO:0030099	myeloid cell differentiation	44/1229	430/18870	0.00199915	0.0315961	0.025696	FLNA/DLL1/SH3PXD2A/APP/TGFB1/BAP1/PPP3CA/MITF/PIR/HOXA7/EPAS1/GPC3/SLC1A5/ITGB8/HOXA9/BMP2/ACTN1/IL34/SLC25A38/KITLG/ROR2/PDE1B/HIF1A/BMP4/MEF2C/TREM2/KIT/IL20/NBEAL2/NOTCH2/HCLS1/IL33/DMTN/MYB/SCIN/MT1G/IKZF1/GAB3/BATF/TYROBP/MEIS2/ETV2/DYRK3/TSPAN2	44	Basal-cell
GO:0051495	positive regulation of cytoskeleton organization	23/1229	184/18870	0.0020006	0.0315961	0.025696	FLNA/SMAD3/GPSM2/WNT4/MET/SYNPO2/EDN1/ARHGEF10/CDC42EP4/MAP1B/ARHGEF5/CX3CL1/BIN1/EVL/BAG4/PSRC1/ARHGEF10L/SCIN/GSN/SPAG5/PLK4/FMN1/MAPT	23	Basal-cell
GO:1903557	positive regulation of tumor necrosis factor superfamily cytokine production	16/1229	110/18870	0.00200778	0.0315961	0.025696	APP/TGFB1/SPON2/IFNGR1/THBS1/PTPRC/AKAP12/PTAFR/IL33/ARID5A/LPL/CD36/CARD9/TYROBP/SPN/HAVCR2	16	Basal-cell
GO:0038065	collagen-activated signaling pathway	5/1229	15/18870	0.00201176	0.0315961	0.025696	ITGA2/COL4A6/COL4A5/DDR1/COL4A1	5	Basal-cell
GO:0051791	medium-chain fatty acid metabolic process	5/1229	15/18870	0.00201176	0.0315961	0.025696	ACOT7/ACAD9/CES1/CRAT/ABHD3	5	Basal-cell
GO:0030500	regulation of bone mineralization	13/1229	81/18870	0.0021171	0.0328238	0.0266945	SMAD3/WNT4/SLC20A2/VDR/ATP2B1/ANKH/BMP2/HIF1A/BMP4/MEF2C/SRGN/BMPR1A/SOX9	13	Basal-cell
GO:0042440	pigment metabolic process	13/1229	81/18870	0.0021171	0.0328238	0.0266945	OCA2/SLC25A38/SLC24A5/ZEB2/MC1R/COX10/DCT/TYR/UGT1A10/PMEL/GPR143/TYRP1/ABCC2	13	Basal-cell
GO:0050810	regulation of steroid biosynthetic process	13/1229	81/18870	0.0021171	0.0328238	0.0266945	DKK3/SNAI2/APOE/WNT4/LPCAT3/BMP2/NR1D1/STAR/CLCN2/ASAH1/CES1/IGFBP7/SREBF2	13	Basal-cell
GO:0061333	renal tubule morphogenesis	13/1229	81/18870	0.0021171	0.0328238	0.0266945	LAMA5/HES1/WNT4/GPC3/GDNF/BMP2/BMP4/MEF2C/COL4A1/NPNT/SOX9/WNT9B/FMN1	13	Basal-cell
GO:1903844	regulation of cellular response to transforming growth factor beta stimulus	21/1229	163/18870	0.00211978	0.0328238	0.0266945	ITGA3/DKK3/HTRA1/LTBP4/CAV2/ASPN/SMAD3/SPRED2/TGFB1/SPRY1/FERMT1/SDCBP/BMP2/THBS1/SPRED1/ZEB2/WFIKKN2/VEPH1/LRG1/PMEPA1/NPNT	21	Basal-cell
GO:0006656	phosphatidylcholine biosynthetic process	7/1229	29/18870	0.00214381	0.032951	0.0267979	LCAT/SLC27A1/LPCAT3/LPCAT1/FABP5/SLC44A3/ABHD3	7	Basal-cell
GO:0060603	mammary gland duct morphogenesis	7/1229	29/18870	0.00214381	0.032951	0.0267979	FGFR2/WNT4/DDR1/VDR/LRP5/AREG/SOSTDC1	7	Basal-cell
GO:0045687	positive regulation of glial cell differentiation	9/1229	45/18870	0.00215197	0.032951	0.0267979	TP73/HES1/TGFB1/BMP2/IL34/TENM4/BIN1/CLCN2/IL33	9	Basal-cell
GO:0048713	regulation of oligodendrocyte differentiation	9/1229	45/18870	0.00215197	0.032951	0.0267979	TP73/HES1/IL34/TMEM98/TENM4/SLC45A3/TNFRSF21/CLCN2/IL33	9	Basal-cell
GO:0043405	regulation of MAP kinase activity	19/1229	142/18870	0.00218496	0.0333632	0.0271332	PDGFA/PDGFC/MST1R/APOE/TGFB1/SPRY1/EDN1/BMP2/IL34/THBS1/ARHGEF5/SORL1/KIT/GHR/PTPN1/PIK3R6/NTF3/PIK3CG/KSR1	19	Basal-cell
GO:0052548	regulation of endopeptidase activity	32/1229	288/18870	0.00221008	0.0336532	0.027369	SERPINH1/GPX1/MIR205/TIMP1/SMAD3/CST3/KHDC1/SERPINF1/SERPINB7/GAS6/SERPINB6/SERPING1/PMAIP1/NGFR/TIMP2/SOX7/GRIN2A/THBS1/A2ML1/DHCR24/SORL1/DLC1/BIN1/CSN2/PRR7/IFI6/GSN/SERPINB12/CARD9/MAPT/SERPINA12/FYN	32	Basal-cell
GO:0140238	presynaptic endocytosis	12/1229	72/18870	0.00223239	0.033899	0.0275689	SYT8/AP2B1/NLGN4Y/ITSN1/BIN1/STON2/NLGN4X/SYNJ2/SYT7/STON1/SNCG/DNAJC6	12	Basal-cell
GO:0032944	regulation of mononuclear cell proliferation	28/1229	242/18870	0.00225659	0.0341721	0.027791	PRNP/LMO1/WNT3A/DLG5/SLC7A1/HES1/LGALS9B/IRF1/EFNB1/PPP3CA/CD276/CBLB/IL20RB/LGALS9C/KITLG/CDKN1A/PTPRC/BMP4/MEF2C/TNFRSF21/HLA-DPA1/HLA-DPB1/LGALS3/AHR/NFATC2/TYROBP/SPN/HAVCR2	28	Basal-cell
GO:2000725	regulation of cardiac muscle cell differentiation	6/1229	22/18870	0.0022754	0.0343624	0.0279458	DLL1/WNT3A/TGFB1/BMP2/BMP4/MEF2C	6	Basal-cell
GO:0033047	regulation of mitotic sister chromatid segregation	10/1229	54/18870	0.0022837	0.0343931	0.0279708	TTK/CDC20/SPC25/NUF2/NDC80/CDCA8/SPC24/KAT2B/BUB1B/CDK1	10	Basal-cell
GO:1900180	regulation of protein localization to nucleus	19/1229	143/18870	0.00236978	0.035592	0.0289458	FLNA/SMAD3/GLUL/TGFB1/CHP2/LIMK2/FERMT1/NGFR/TMEM98/CACNB4/CARD10/BMP4/APOD/HCLS1/EFCAB7/CD36/CDK1/CHP1/FYN	19	Basal-cell
GO:0070372	regulation of ERK1 and ERK2 cascade	34/1229	313/18870	0.00238517	0.0357255	0.0290544	FGFR2/PDGFA/PDGFC/NRG1/ACKR3/MIR205/APOE/CCL2/SPRED2/APP/TGFB1/SPRY1/GAS6/TPBG/BMP2/RRAS/SPRED1/CX3CL1/PTPRC/BMP4/DUSP6/TREM2/GLIPR2/AKAP12/NOTCH2/SHC1/NPNT/HMGCR/PTPN1/CD36/CARD9/PKHD1/FN1/HAVCR2	34	Basal-cell
GO:0033674	positive regulation of kinase activity	36/1229	337/18870	0.0024062	0.0359426	0.0292309	CCND2/FGFR2/PDGFA/PDGFC/PRNP/MST1R/NRG1/TGFB1/NTRK2/DDR1/MET/EDN1/GAS6/TNFRSF10B/EMP2/IL34/THBS1/TRAF4/ROR2/ARHGEF5/CDKN1A/PTPRC/CARD10/TREM2/ERBB3/KIT/GHR/PSRC1/CCND1/CALM3/PTPN1/PIK3R6/NTF3/KIF14/PIK3CG/MAPT	36	Basal-cell
GO:0045833	negative regulation of lipid metabolic process	16/1229	112/18870	0.00242333	0.0361004	0.0293592	DKK3/PDGFA/SNAI2/APOE/WNT4/SLC27A1/FMO1/BMP2/PIK3IP1/SORL1/LPCAT1/APOD/SOX9/PIK3CG/SERPINA12/BRCA1	16	Basal-cell
GO:0008217	regulation of blood pressure	23/1229	187/18870	0.00246901	0.0366815	0.0298318	DLL1/POSTN/ERAP1/PTGS1/ERAP2/SMAD3/SLC2A5/EDN1/GAS6/ATP2B1/EMP2/EDNRA/EDN2/SCNN1A/LRP5/BDKRB1/RENBP/EXT2/EDNRB/PTAFR/OR51E2/UCN/COL1A2	23	Basal-cell
GO:0032943	mononuclear cell proliferation	34/1229	314/18870	0.00251232	0.0371903	0.0302456	PRNP/LMO1/WNT3A/DLG5/SLC7A1/HES1/LGALS9B/WNT4/IRF1/EFNB1/CD151/PPP3CA/CD276/CBLB/IL20RB/LGALS9C/EMP2/KITLG/CDKN1A/BTN3A1/PTPRC/BMP4/MEF2C/TNFRSF21/HLA-DPA1/HLA-DPB1/LGALS3/AHR/NFATC2/TYROBP/PIK3CG/SPN/FYN/HAVCR2	34	Basal-cell
GO:0048483	autonomic nervous system development	9/1229	46/18870	0.00252355	0.0371903	0.0302456	TP63/ACKR3/HES1/GDNF/EDNRA/HOXB2/SOX10/EDNRB/FN1	9	Basal-cell
GO:1901861	regulation of muscle tissue development	9/1229	46/18870	0.00252355	0.0371903	0.0302456	DLL1/WNT3A/SMAD3/TGFB1/CDON/JPH2/BMP4/MEF2C/ERBB3	9	Basal-cell
GO:0050807	regulation of synapse organization	28/1229	244/18870	0.00254355	0.0373847	0.0304037	THBS2/CLSTN1/ITGB1/PRNP/WNT3A/APOE/DLG5/WNT7A/APP/NTRK2/IGSF9/NGEF/IL1RAP/TPBG/PLXNC1/TUBA1A/ROR2/CDH8/SLITRK6/MEF2C/TREM2/RPS6KA5/CDC20/ARHGAP22/SRGN/SLITRK2/CAMK2B/FYN	28	Basal-cell
GO:0002065	columnar/cuboidal epithelial cell differentiation	17/1229	123/18870	0.00258089	0.0378325	0.0307679	DLL1/TP63/FGFR2/NFIB/DLG5/HES1/WNT4/TGFB1/BMP2/MAP1B/CDKN1A/HIF1A/BMP4/CLCN2/FST/SOX9/DLX3	17	Basal-cell
GO:0045987	positive regulation of smooth muscle contraction	7/1229	30/18870	0.00264132	0.0383693	0.0312045	ITGA2/NMU/EDN1/EDN2/KIT/PTAFR/NPNT	7	Basal-cell
GO:0060441	epithelial tube branching involved in lung morphogenesis	7/1229	30/18870	0.00264132	0.0383693	0.0312045	FGFR2/DLG5/TNC/SPRY1/CELSR1/BMP4/SOX9	7	Basal-cell
GO:0070168	negative regulation of biomineral tissue development	7/1229	30/18870	0.00264132	0.0383693	0.0312045	ASPN/TGFB1/GAS6/HIF1A/HEY1/SRGN/SOX9	7	Basal-cell
GO:0007492	endoderm development	13/1229	83/18870	0.00264544	0.0383693	0.0312045	LAMB3/LAMA3/COL7A1/SMAD3/COL5A1/COL5A2/COL12A1/SOX7/LAMC1/BMP4/MMP2/BMPR1A/FN1	13	Basal-cell
GO:0060563	neuroepithelial cell differentiation	8/1229	38/18870	0.00267493	0.038695	0.0314694	DLL1/DLG5/HES1/WNT4/TGFB1/BMP2/MAP1B/DLX3	8	Basal-cell
GO:0045995	regulation of embryonic development	14/1229	93/18870	0.00270141	0.0389678	0.0316912	LAMA3/PHLDB1/DLL1/LAMA5/WNT3A/HES1/WNT4/TGIF2/PHLDB2/TENM4/KAT2B/SCX/LAMA4/CDK1	14	Basal-cell
GO:0014012	peripheral nervous system axon regeneration	4/1229	10/18870	0.00273632	0.0389678	0.0316912	TNC/MAP1B/APOD/MMP2	4	Basal-cell
GO:0034351	negative regulation of glial cell apoptotic process	4/1229	10/18870	0.00273632	0.0389678	0.0316912	DLL1/CCL2/GAS6/TREM2	4	Basal-cell
GO:0038063	collagen-activated tyrosine kinase receptor signaling pathway	4/1229	10/18870	0.00273632	0.0389678	0.0316912	COL4A6/COL4A5/DDR1/COL4A1	4	Basal-cell
GO:0060502	epithelial cell proliferation involved in lung morphogenesis	4/1229	10/18870	0.00273632	0.0389678	0.0316912	FGFR2/NFIB/BMP4/SOX9	4	Basal-cell
GO:0070099	regulation of chemokine-mediated signaling pathway	4/1229	10/18870	0.00273632	0.0389678	0.0316912	EDN1/HIF1A/TREM2/PADI2	4	Basal-cell
GO:0045936	negative regulation of phosphate metabolic process	39/1229	376/18870	0.00275436	0.0390516	0.0317594	PDGFA/PRNP/APOE/SPRED2/DYNLL1/TGFB1/SPRY1/CBLB/SLC27A1/BDKRB2/GNAQ/BMP2/PKIB/SPRED1/LRP5/BDKRB1/ERRFI1/IGFBP3/PIK3IP1/SORL1/CDKN1A/PTPRC/DUSP6/LPCAT1/CRY2/DMD/PBK/DMTN/LGALS3/CALM3/PTPN1/NTF3/MICAL1/CHP1/CDKN2C/HHEX/MAPT/MIR711/DEPTOR	39	Basal-cell
GO:0006878	intracellular copper ion homeostasis	5/1229	16/18870	0.00277062	0.0390516	0.0317594	PRNP/APP/MT2A/ATOX1/SLC31A2	5	Basal-cell
GO:0051895	negative regulation of focal adhesion assembly	5/1229	16/18870	0.00277062	0.0390516	0.0317594	PHLDB2/THBS1/DLC1/APOD/DMTN	5	Basal-cell
GO:0150118	negative regulation of cell-substrate junction organization	5/1229	16/18870	0.00277062	0.0390516	0.0317594	PHLDB2/THBS1/DLC1/APOD/DMTN	5	Basal-cell
GO:0072006	nephron development	20/1229	156/18870	0.00282847	0.0395889	0.0321963	ITGA3/DLL1/LAMA5/NOTCH3/HES1/WNT4/PPP3CA/SERPINB7/GPC3/GDNF/BMP2/EDNRA/BMP4/MEF2C/EDNRB/NOTCH2/NPNT/SOX9/WNT9B/FMN1	20	Basal-cell
GO:0045669	positive regulation of osteoblast differentiation	12/1229	74/18870	0.00282949	0.0395889	0.0321963	GDPD2/TP63/IFITM1/WNT4/PPP3CA/BMP2/LRP5/BMP4/MEF2C/LRP3/NPNT/BMPR1A	12	Basal-cell
GO:0046890	regulation of lipid biosynthetic process	23/1229	189/18870	0.00283035	0.0395889	0.0321963	DKK3/PDGFA/SNAI2/APOE/WNT4/HSD17B13/SLC27A1/LPCAT3/BMP2/NR1D1/LPCAT1/SLC45A3/FABP5/STAR/CLCN2/ASAH1/CES1/KAT2B/IGFBP7/SREBF2/CHP1/SERPINA12/BRCA1	23	Basal-cell
GO:0010563	negative regulation of phosphorus metabolic process	39/1229	377/18870	0.00288498	0.0402505	0.0327344	PDGFA/PRNP/APOE/SPRED2/DYNLL1/TGFB1/SPRY1/CBLB/SLC27A1/BDKRB2/GNAQ/BMP2/PKIB/SPRED1/LRP5/BDKRB1/ERRFI1/IGFBP3/PIK3IP1/SORL1/CDKN1A/PTPRC/DUSP6/LPCAT1/CRY2/DMD/PBK/DMTN/LGALS3/CALM3/PTPN1/NTF3/MICAL1/CHP1/CDKN2C/HHEX/MAPT/MIR711/DEPTOR	39	Basal-cell
GO:0050878	regulation of body fluid levels	38/1229	365/18870	0.00290605	0.0404419	0.03289	FLNA/KRT1/PDGFA/ITGA2/PDPN/WNT3A/APOE/MYL9/NCOR2/DDR1/PPP3CA/EDN1/VDR/GAS6/PROS1/ANO1/SERPING1/VAV2/GNAQ/EMP2/THBS1/SCNN1A/PROCR/HIF1A/FZD6/RAB27A/EXT2/EDNRB/CSN2/SAA1/CCND1/FERMT3/DMTN/VKORC1/CD36/PIK3CG/MYO5B/SOCS2	38	Basal-cell
GO:0010837	regulation of keratinocyte proliferation	9/1229	47/18870	0.00294421	0.040615	0.0330308	TP63/FGFR2/SNAI2/VDR/PTPRK/IFT172/AREG/LRG1/NOTCH2	9	Basal-cell
GO:0055010	ventricular cardiac muscle tissue morphogenesis	9/1229	47/18870	0.00294421	0.040615	0.0330308	FGFR2/NRG1/DSP/TGFB1/EDNRA/PKP2/LRP2/BMPR1A/ZFPM2	9	Basal-cell
GO:0099054	presynapse assembly	9/1229	47/18870	0.00294421	0.040615	0.0330308	WNT3A/WNT7A/APP/IL1RAP/SDCBP/NLGN4Y/SLITRK6/NLGN4X/SLITRK2	9	Basal-cell
GO:0002573	myeloid leukocyte differentiation	27/1229	235/18870	0.00295249	0.040615	0.0330308	SH3PXD2A/APP/TGFB1/BAP1/PPP3CA/MITF/PIR/HOXA7/GPC3/ITGB8/BMP2/IL34/KITLG/ROR2/PDE1B/BMP4/TREM2/KIT/IL20/NOTCH2/HCLS1/IL33/MT1G/GAB3/BATF/TYROBP/TSPAN2	27	Basal-cell
GO:0010324	membrane invagination	11/1229	65/18870	0.00296591	0.040615	0.0330308	ITGA2/ABCA1/THBS1/RAB31/TREM2/GULP1/SNX33/GSN/CD36/ELMO1/BIN2	11	Basal-cell
GO:0030199	collagen fibril organization	11/1229	65/18870	0.00296591	0.040615	0.0330308	SERPINH1/COL18A1/COL5A1/COL5A2/COL12A1/P4HA1/PLOD3/SCX/AEBP1/TLL1/COL1A2	11	Basal-cell
GO:0061326	renal tubule development	15/1229	104/18870	0.00297021	0.040615	0.0330308	DLL1/LAMA5/HES1/WNT4/GPC3/GDNF/BMP2/BMP4/MEF2C/NOTCH2/COL4A1/NPNT/SOX9/WNT9B/FMN1	15	Basal-cell
GO:0001954	positive regulation of cell-matrix adhesion	10/1229	56/18870	0.00302023	0.0410527	0.0333868	CDH13/COL16A1/SMAD3/WNT4/FERMT1/EMP2/RRAS/CX3CL1/CD36/FMN1	10	Basal-cell
GO:0045839	negative regulation of mitotic nuclear division	10/1229	56/18870	0.00302023	0.0410527	0.0333868	TOM1L2/BMP4/TTK/CDC20/SPC25/NUF2/NDC80/CDCA8/SPC24/BUB1B	10	Basal-cell
GO:0033002	muscle cell proliferation	28/1229	247/18870	0.00303209	0.0410527	0.0333868	CDH13/FGFR2/ITGA2/NOTCH3/TP73/APOE/CAV2/TGFB1/EDN1/BMP2/THBS1/HPGD/TENM4/IGFBP3/CDKN1A/CX3CL1/BMP4/MEF2C/ADAMTS1/SIX5/APOD/PTAFR/NDC80/MMP2/MYB/BMPR1A/CDK1/ZFPM2	28	Basal-cell
GO:0090257	regulation of muscle system process	28/1229	247/18870	0.00303209	0.0410527	0.0333868	ITGA2/MEF2A/TNNT1/MYL9/SMAD3/DSP/KCNJ2/NMU/PPP3CA/EDN1/ATP2B1/EDN2/TNNT3/DSG2/ADORA2B/KIT/BIN1/DMD/PKP2/PTAFR/TRIM63/NPNT/CALM3/ANXA6/MIR25/UCN/PIK3CG/CAMK2B	28	Basal-cell
GO:0001838	embryonic epithelial tube formation	17/1229	125/18870	0.00306431	0.0412855	0.0335761	WNT4/TGFB1/PTK7/CELSR1/ST14/GRHL3/RGMA/GDNF/IFT172/HIF1A/BMP4/FZD6/DLC1/LRP2/KIF20B/SOX9/WNT9B	17	Basal-cell
GO:0006821	chloride transport	17/1229	125/18870	0.00306431	0.0412855	0.0335761	SLC12A4/SLC1A3/ANO1/CLCC1/OCA2/BEST1/SLC1A4/SLC6A1/CLCA4/CLCN2/CLIC3/SLC26A6/GABRD/GABRA4/CLDN4/TTYH2/APOL1	17	Basal-cell
GO:0010762	regulation of fibroblast migration	8/1229	39/18870	0.00317646	0.0425555	0.034609	ITGB1/TGFB1/THBS1/ZEB2/AKAP12/BAG4/ARHGAP4/DMTN	8	Basal-cell
GO:0002695	negative regulation of leukocyte activation	24/1229	202/18870	0.00318179	0.0425555	0.034609	PRNP/ASCL2/DLG5/LGALS9B/IRF1/CBLB/IL20RB/RUNX3/LGALS9C/NR1D1/NRARP/CX3CL1/PTPRC/BMP4/PGLYRP3/TNFRSF21/PARP3/LGALS3/TNFAIP8L2/PAG1/TYROBP/SPN/FN1/HAVCR2	24	Basal-cell
GO:0007051	spindle organization	24/1229	202/18870	0.00318179	0.0425555	0.034609	FLNA/GPSM2/LIMK2/ARHGEF10/KIZ/TACC3/HAUS6/PSRC1/TTK/KIF23/CDC20/SPC25/KIFC2/NUF2/NDC80/CDCA8/PARP3/CEP72/WDR62/EFHC1/KIFC1/SPAG5/MYBL2/PRC1	24	Basal-cell
GO:0003338	metanephros morphogenesis	7/1229	31/18870	0.00322287	0.0430003	0.0349707	HES1/WNT4/GDNF/BMP4/SOX9/WNT9B/FMN1	7	Basal-cell
GO:0031099	regeneration	23/1229	191/18870	0.00323532	0.0430619	0.0350208	FLNA/POSTN/GPX1/NFIB/WNT7A/SLC7A5/TNC/PPP3CA/HOPX/GAS6/RGMA/ANXA3/RTN4RL2/LGR6/FPGS/MAP1B/CDKN1A/CLDN1/APOD/CCND1/MMP2/CAPN3/CDK1	23	Basal-cell
GO:0070252	actin-mediated cell contraction	15/1229	105/18870	0.00326171	0.0433083	0.0352212	FLNA/PDPN/DSP/KCNJ2/EMP2/SCN4B/DSG2/EPDR1/ZEB2/BIN1/PKP2/SGCD/KCNE4/GSN/KCNN2	15	Basal-cell
GO:0071230	cellular response to amino acid stimulus	13/1229	85/18870	0.00327699	0.0434062	0.0353008	ASS1/PDGFC/COL16A1/COL4A6/NTRK2/SLC7A5/COL5A2/LAMTOR4/CPEB4/MMP2/COL4A1/COL1A2/FYN	13	Basal-cell
GO:0043270	positive regulation of monoatomic ion transport	25/1229	214/18870	0.00331506	0.0438051	0.0356252	FLNA/ATP1B3/CCL2/KCNJ2/FHL1/CHP2/PPP3CA/EDN1/ATP2B1/SCN4B/EDNRA/JPH2/BDKRB1/CX3CL1/TREM2/CNTN1/TRPV2/DMD/PKP2/LGALS3/CAPN3/CALM3/PLP1/UCN/CHP1	25	Basal-cell
GO:0003002	regionalization	43/1229	430/18870	0.0034167	0.0449531	0.0365588	WNT3/DLL1/TP63/FGFR2/LAMA5/WLS/WNT3A/LFNG/SMAD3/WNT7A/HES1/NTF4/SPRY1/HES4/EDN1/SMARCD3/HOXA7/ETS2/GPC3/GDNF/CDON/HOXA9/BMP2/NRARP/IFT172/HOXB2/LRP5/HES2/HIF1A/BMP4/DNAAF3/MEF2C/DNAH11/GLI2/NOTCH2/HOXB4/HEY1/SOSTDC1/LRP2/BMPR1A/TLL1/HHEX/ACD	43	Basal-cell
GO:0046189	phenol-containing compound biosynthetic process	9/1229	48/18870	0.0034183	0.0449531	0.0365588	MOXD1/OCA2/SLC24A5/ZEB2/MC1R/DCT/TYR/PMEL/TYRP1	9	Basal-cell
GO:0019748	secondary metabolic process	10/1229	57/18870	0.00345348	0.0451994	0.0367592	FMO1/OCA2/AKR1B10/SLC24A5/ZEB2/MC1R/DCT/TYR/PMEL/TYRP1	10	Basal-cell
GO:0061900	glial cell activation	10/1229	57/18870	0.00345348	0.0451994	0.0367592	APP/IFNGR1/NR1D1/CX3CL1/PTPRC/ZEB2/TREM2/IL33/TYROBP/MAPT	10	Basal-cell
GO:0050863	regulation of T cell activation	39/1229	381/18870	0.0034621	0.0452047	0.0367635	PRNP/LMO1/ASCL2/SOX12/CCL2/DLG5/SLC7A1/HES1/LGALS9B/IRF1/EFNB1/PPP3CA/CD276/CBLB/IL20RB/SMARCD3/FOXN1/RUNX3/LGALS9C/NRARP/KITLG/PTPRC/BMP4/VNN1/LGALS1/TNFRSF21/GLI2/HLA-DPA1/HLA-DPB1/HLA-DRA/LGALS3/TNFAIP8L2/PIK3R6/PAG1/BATF/CD83/SPN/FYN/HAVCR2	39	Basal-cell
GO:1901890	positive regulation of cell junction assembly	15/1229	106/18870	0.00357631	0.0465852	0.0378862	THBS2/CLSTN1/COL16A1/DLG5/SMAD3/WNT7A/WNT4/NTRK2/HOPX/IL1RAP/TPBG/SLITRK6/CLDN1/SLITRK2/FMN1	15	Basal-cell
GO:0003231	cardiac ventricle development	17/1229	127/18870	0.00362048	0.0469922	0.0382172	FGFR2/NRG1/DSP/HES1/TGFB1/AP2B1/PTK7/SMARCD3/EDNRA/HIF1A/BMP4/MEF2C/PKP2/HEY1/LRP2/BMPR1A/ZFPM2	17	Basal-cell
GO:0007159	leukocyte cell-cell adhesion	42/1229	419/18870	0.00362465	0.0469922	0.0382172	ASS1/ITGB1/PRNP/ASCL2/SOX12/CCL2/DLG5/SLC7A1/HES1/LGALS9B/IRF1/EFNB1/PPP3CA/CD276/CBLB/IL20RB/SMARCD3/RUNX3/LGALS9C/NRARP/KITLG/PTPRC/BMP4/VNN1/LGALS1/LRG1/TNFRSF21/GLI2/HLA-DPA1/PTAFR/HLA-DPB1/HLA-DRA/FERMT3/LGALS3/TNFAIP8L2/PIK3R6/PAG1/NT5E/CD83/SPN/FYN/HAVCR2	42	Basal-cell
GO:0003128	heart field specification	5/1229	17/18870	0.00371676	0.0477361	0.0388222	SMARCD3/BMP2/BMP4/MEF2C/LRP2	5	Basal-cell
GO:0010470	regulation of gastrulation	5/1229	17/18870	0.00371676	0.0477361	0.0388222	PHLDB1/TGIF2/PHLDB2/TENM4/SCX	5	Basal-cell
GO:0070206	protein trimerization	5/1229	17/18870	0.00371676	0.0477361	0.0388222	SLC1A5/SIGMAR1/SLC1A2/COL1A2/ALOX5AP	5	Basal-cell
GO:0072077	renal vesicle morphogenesis	5/1229	17/18870	0.00371676	0.0477361	0.0388222	WNT4/GDNF/SOX9/WNT9B/FMN1	5	Basal-cell
GO:0043547	positive regulation of GTPase activity	27/1229	239/18870	0.0037313	0.0478031	0.0388766	TAX1BP3/ITGB1/ITGA6/CAV2/CCL2/RAPGEF1/NGEF/ARAP1/ARHGEF10/ARHGEF5/ARHGAP29/NET1/RASGEF1B/CX3CL1/RALGPS2/PREX1/SIPA1L3/TBC1D1/SLC27A4/ARHGAP22/TBC1D8B/RAPGEFL1/SRGAP2/NTF3/RGL3/AGAP6/RANGAP1	27	Basal-cell
GO:0042129	regulation of T cell proliferation	22/1229	182/18870	0.00374583	0.0478031	0.0388766	PRNP/LMO1/DLG5/SLC7A1/HES1/LGALS9B/IRF1/EFNB1/PPP3CA/CD276/CBLB/IL20RB/LGALS9C/KITLG/PTPRC/BMP4/TNFRSF21/HLA-DPA1/HLA-DPB1/LGALS3/SPN/HAVCR2	22	Basal-cell
GO:0032570	response to progesterone	8/1229	40/18870	0.00374807	0.0478031	0.0388766	TGFB1/TXNIP/DSG1/THBS1/DSG2/SOX10/TRERF1/CLDN4	8	Basal-cell
GO:0002687	positive regulation of leukocyte migration	19/1229	149/18870	0.00377583	0.0478053	0.0388784	ITGA2/ASCL2/APP/TNFRSF18/EDN1/GAS6/IL34/THBS1/EDN2/KITLG/BDKRB1/CX3CL1/PLA2G7/TREM2/PTAFR/LGALS3/LYVE1/GPSM3/SPN	19	Basal-cell
GO:0001655	urogenital system development	11/1229	67/18870	0.00378213	0.0478053	0.0388784	TP63/FGFR2/ALOX15B/TNC/SERPINF1/HOXA9/BMP4/MMP2/SOX9/PSAP/ACD	11	Basal-cell
GO:0060675	ureteric bud morphogenesis	11/1229	67/18870	0.00378213	0.0478053	0.0388784	LAMA5/HES1/WNT4/GPC3/GDNF/BMP2/BMP4/NPNT/SOX9/WNT9B/FMN1	11	Basal-cell
GO:0048660	regulation of smooth muscle cell proliferation	21/1229	171/18870	0.00378303	0.0478053	0.0388784	CDH13/FGFR2/ITGA2/NOTCH3/APOE/TGFB1/EDN1/BMP2/THBS1/HPGD/IGFBP3/CDKN1A/CX3CL1/BMP4/MEF2C/ADAMTS1/APOD/PTAFR/MMP2/MYB/BMPR1A	21	Basal-cell
GO:0007163	establishment or maintenance of cell polarity	26/1229	228/18870	0.00385977	0.0486632	0.0395761	DST/PDLIM1/ITGB1/RHOV/DLG5/WNT7A/GPSM2/HES1/SPRY1/PTK7/FAT1/PHLDB2/FERMT1/RUFY3/MAP1B/FBF1/SIPA1L3/NDC80/CYTH3/GSN/SPAG5/KIF20B/KIF25/CENPA/SPN/PKHD1	26	Basal-cell
GO:0007435	salivary gland morphogenesis	7/1229	32/18870	0.00389722	0.0487606	0.0396553	FGFR2/PDGFA/LAMA5/SNAI2/NFIB/TGFB1/PLXND1	7	Basal-cell
GO:0010464	regulation of mesenchymal cell proliferation	7/1229	32/18870	0.00389722	0.0487606	0.0396553	FGFR2/PDGFA/NFIB/LRP5/BMP4/BMPR1A/SOX9	7	Basal-cell
GO:0010765	positive regulation of sodium ion transport	7/1229	32/18870	0.00389722	0.0487606	0.0396553	ATP1B3/CHP2/SCN4B/CNTN1/DMD/PKP2/CHP1	7	Basal-cell
GO:0050900	leukocyte migration	40/1229	396/18870	0.00390297	0.0487606	0.0396553	ITGA3/ITGB1/ITGA2/ASCL2/ITGA6/CCL2/APP/TNFRSF18/EDN1/HOXA7/GAS6/CNN2/EMP2/MMP28/IL34/THBS1/EDN2/KITLG/BDKRB1/ROR2/ARHGEF5/CX3CL1/PLA2G7/PREX1/TREM2/KIT/EDNRB/SAA1/APOD/PTAFR/IL33/MMP2/IL16/LGALS3/LYVE1/GPSM3/PADI2/PIK3CG/SPN/FYN	40	Basal-cell
GO:0032231	regulation of actin filament bundle assembly	15/1229	107/18870	0.00391532	0.0488039	0.0396906	FLNA/SMAD3/WNT4/MET/SYNPO2/ARAP1/PHLDB2/ARHGEF10/ARHGEF5/CX3CL1/DLC1/TJP1/EVL/BAG4/ARHGEF10L	15	Basal-cell
GO:0010927	cellular component assembly involved in morphogenesis	17/1229	128/18870	0.00392834	0.0488554	0.0397325	ITGB4/PHLDB1/ITGB1/MEF2A/TNNT1/MYL9/MYOM2/EDN1/RFX2/PHLDB2/PMP22/NEBL/TNNT3/TENM4/CNTN1/TMOD1/CAPN3	17	Basal-cell
GO:0001774	microglial cell activation	9/1229	49/18870	0.00395033	0.0489649	0.0398215	APP/IFNGR1/NR1D1/CX3CL1/PTPRC/TREM2/IL33/TYROBP/MAPT	9	Basal-cell
GO:0034764	positive regulation of transmembrane transport	25/1229	217/18870	0.00398131	0.0489649	0.0398215	FLNA/ATP1B3/ITGB1/MEF2A/CCL2/KCNJ2/SLC7A5/CHP2/PPP3CA/EDN1/GPC3/EDNRA/JPH2/BDKRB1/CLTCL1/CX3CL1/ACSL1/TREM2/DMD/SLC1A2/CAPN3/SLC26A6/CALM3/PLP1/CHP1	25	Basal-cell
GO:0071277	cellular response to calcium ion	13/1229	87/18870	0.00402592	0.0489649	0.0398215	MEF2A/SYT8/CHP2/EDN1/CPNE8/TUBA1A/MEF2C/SYT17/DMTN/CAPN3/SYT7/NFATC2/ALOX5AP	13	Basal-cell
GO:0072073	kidney epithelium development	19/1229	150/18870	0.00406673	0.0489649	0.0398215	DLL1/FGFR2/LAMA5/SMAD3/HES1/WNT4/SPRY1/GPC3/GDNF/BMP2/EDNRA/BMP4/MEF2C/EDNRB/NOTCH2/NPNT/SOX9/WNT9B/FMN1	19	Basal-cell
GO:0006606	protein import into nucleus	20/1229	161/18870	0.00407518	0.0489649	0.0398215	FLNA/SMAD3/TGFB1/TXNIP/CHP2/PPP3CA/CBLB/FERMT1/CDKN1A/BMP4/CRY2/SNUPN/RGPD3/APOD/HCLS1/IL33/EFCAB7/CD36/CDK1/CHP1	20	Basal-cell
GO:0003139	secondary heart field specification	4/1229	11/18870	0.00407967	0.0489649	0.0398215	SMARCD3/BMP4/MEF2C/LRP2	4	Basal-cell
GO:0019372	lipoxygenase pathway	4/1229	11/18870	0.00407967	0.0489649	0.0398215	GPX1/ALOX15B/HPGD/ALOX5AP	4	Basal-cell
GO:0032342	aldosterone biosynthetic process	4/1229	11/18870	0.00407967	0.0489649	0.0398215	DKK3/WNT4/BMP2/CLCN2	4	Basal-cell
GO:0032610	interleukin-1 alpha production	4/1229	11/18870	0.00407967	0.0489649	0.0398215	IL1R2/CX3CL1/IL16/PANX1	4	Basal-cell
GO:0032650	regulation of interleukin-1 alpha production	4/1229	11/18870	0.00407967	0.0489649	0.0398215	IL1R2/CX3CL1/IL16/PANX1	4	Basal-cell
GO:0035878	nail development	4/1229	11/18870	0.00407967	0.0489649	0.0398215	ITGB4/ITGA6/FOXN1/FZD6	4	Basal-cell
GO:0048103	somatic stem cell division	4/1229	11/18870	0.00407967	0.0489649	0.0398215	ZFP36L2/WNT3A/WNT7A/HOXB4	4	Basal-cell
GO:0060601	lateral sprouting from an epithelium	4/1229	11/18870	0.00407967	0.0489649	0.0398215	TP63/FGFR2/CELSR1/BMP4	4	Basal-cell
GO:0070778	L-aspartate transmembrane transport	4/1229	11/18870	0.00407967	0.0489649	0.0398215	SLC1A3/SLC1A5/SLC1A4/SLC1A2	4	Basal-cell
GO:0072173	metanephric tubule morphogenesis	4/1229	11/18870	0.00407967	0.0489649	0.0398215	HES1/WNT4/SOX9/WNT9B	4	Basal-cell
GO:2000727	positive regulation of cardiac muscle cell differentiation	4/1229	11/18870	0.00407967	0.0489649	0.0398215	WNT3A/TGFB1/BMP4/MEF2C	4	Basal-cell
GO:0044703	multi-organism reproductive process	24/1229	206/18870	0.00409327	0.0490211	0.0398672	ITGB4/ITGA3/ITGA2/SLC2A1/ACSL4/TIMP1/COL16A1/WNT4/DDR1/EDN1/VDR/DSG1/EMP2/HPGD/DSG2/ENDOU/TPPP3/PTAFR/MMP2/ARHGDIB/IGFBP7/UCN/CLDN4/HAVCR2	24	Basal-cell
GO:0007088	regulation of mitotic nuclear division	16/1229	118/18870	0.0041189	0.0492209	0.0400297	CAV2/EDN1/LRP5/TOM1L2/BMP4/TTK/CDC20/SPC25/NUF2/NDC80/CDCA8/SPC24/UBE2C/BUB1B/KIF20B/NUSAP1	16	Basal-cell
GO:0035567	non-canonical Wnt signaling pathway	11/1229	68/18870	0.00425258	0.0505983	0.0411499	WNT7A/PTK7/CELSR1/GRHL3/GPC3/WNT5B/TMEM67/DAAM1/FZD6/WNT9B/FZD4	11	Basal-cell
GO:0072171	mesonephric tubule morphogenesis	11/1229	68/18870	0.00425258	0.0505983	0.0411499	LAMA5/HES1/WNT4/GPC3/GDNF/BMP2/BMP4/NPNT/SOX9/WNT9B/FMN1	11	Basal-cell
GO:0006694	steroid biosynthetic process	22/1229	184/18870	0.00427517	0.0507572	0.0412791	DKK3/SNAI2/APOE/CYB5R1/WNT4/LPCAT3/BMP2/SRD5A3/NR1D1/FDFT1/DHCR24/STAR/CLCN2/ASAH1/CES1/HMGCR/SLC27A5/IGFBP7/SREBF2/ACAA2/TM7SF2/OSBPL7	22	Basal-cell
GO:0002685	regulation of leukocyte migration	26/1229	230/18870	0.00433635	0.0513075	0.0417267	ITGA2/ASCL2/CCL2/APP/TNFRSF18/EDN1/HOXA7/GAS6/CNN2/MMP28/IL34/THBS1/EDN2/KITLG/BDKRB1/CX3CL1/PLA2G7/TREM2/APOD/PTAFR/IL33/LGALS3/LYVE1/GPSM3/PADI2/SPN	26	Basal-cell
GO:0071902	positive regulation of protein serine/threonine kinase activity	18/1229	140/18870	0.00434019	0.0513075	0.0417267	CCND2/PDGFA/PDGFC/MST1R/TGFB1/EDN1/IL34/THBS1/ARHGEF5/KIT/GHR/PSRC1/CCND1/CALM3/PTPN1/PIK3R6/NTF3/PIK3CG	18	Basal-cell
GO:0001657	ureteric bud development	14/1229	98/18870	0.00439681	0.0518173	0.0421412	FGFR2/LAMA5/SMAD3/HES1/WNT4/SPRY1/GPC3/GDNF/BMP2/BMP4/NPNT/SOX9/WNT9B/FMN1	14	Basal-cell
GO:0050772	positive regulation of axonogenesis	12/1229	78/18870	0.00441158	0.0518173	0.0421412	WNT3/WNT3A/NTRK2/PLXNC1/CRABP2/RUFY3/MAP1B/PLXND1/TRPV2/L1CAM/MAPT/FN1	12	Basal-cell
GO:1901568	fatty acid derivative metabolic process	12/1229	78/18870	0.00441158	0.0518173	0.0421412	ACSL4/ALOX15B/HPGD/THEM5/GGT6/ACSL1/ACOT7/HACD2/TYRP1/SLC27A5/ELOVL6/OXCT1	12	Basal-cell
GO:0000281	mitotic cytokinesis	13/1229	88/18870	0.0044491	0.0519449	0.042245	KIF20A/SNX33/CIT/KIF23/ANLN/MITD1/CDCA8/EXOC6/EFHC1/KIF20B/IQGAP3/CENPA/NUSAP1	13	Basal-cell
GO:0033627	cell adhesion mediated by integrin	13/1229	88/18870	0.0044491	0.0519449	0.042245	ITGB4/ITGA3/ITGB1/ITGA2/SNAI2/ITGA6/COL16A1/ITGB8/FERMT1/FERMT3/NPNT/LPXN/PIK3CG	13	Basal-cell
GO:0010718	positive regulation of epithelial to mesenchymal transition	10/1229	59/18870	0.00446724	0.0519449	0.042245	PDPN/SMAD3/TGFB1/SDCBP/BMP2/EMP2/ALX1/BMP4/GLIPR2/LRG1	10	Basal-cell
GO:0033619	membrane protein proteolysis	10/1229	59/18870	0.00446724	0.0519449	0.042245	ERAP1/APOE/TIMP1/TGFB1/RGMA/PSEN2/TMPRSS6/SPPL2A/TIMP2/SNX33	10	Basal-cell
GO:0007059	chromosome segregation	42/1229	424/18870	0.0044697	0.0519449	0.042245	FLNA/SMARCAD1/GPSM2/SMARCD3/TTL/BCL7A/ARHGEF10/GEM/KIF18B/TOP2A/SKA1/HJURP/CENPL/SKA3/TACC3/ESCO2/HAUS6/PSRC1/NCAPH/TTK/KIF23/CDC20/SPC25/KIFC2/NUF2/NDC80/CDCA8/CENPU/SPC24/KAT2B/UBE2C/KIFC1/BUB1B/SPAG5/KIF25/CDK1/CENPM/KIF14/NUSAP1/MYBL2/PRC1/BRCA1	42	Basal-cell
GO:0010878	cholesterol storage	6/1229	25/18870	0.00456726	0.0526448	0.0428142	ABCA1/TREM2/LPL/CES1/CD36/SREBF2	6	Basal-cell
GO:0035336	long-chain fatty-acyl-CoA metabolic process	6/1229	25/18870	0.00456726	0.0526448	0.0428142	ACSL4/THEM5/ACSL1/ACOT7/HACD2/ELOVL6	6	Basal-cell
GO:0048143	astrocyte activation	6/1229	25/18870	0.00456726	0.0526448	0.0428142	APP/IFNGR1/NR1D1/ZEB2/TREM2/MAPT	6	Basal-cell
GO:0051402	neuron apoptotic process	30/1229	278/18870	0.00456823	0.0526448	0.0428142	TP63/PRNP/GPX1/APOE/CCL2/APP/NTRK2/NTF4/PRODH/GDNF/SIGMAR1/NGFR/CHL1/TUBA1A/PLXND1/CX3CL1/HIF1A/MEF2C/TREM2/ERBB3/TNFRSF21/CPEB4/CIT/CCND1/GRIK2/MYB/NTF3/KIF14/UCN/MYBL2	30	Basal-cell
GO:0050730	regulation of peptidyl-tyrosine phosphorylation	26/1229	231/18870	0.00459256	0.0528145	0.0429522	PDGFA/PDGFC/PRNP/APP/HES1/TGFB1/TNFRSF18/CBLB/IL34/KITLG/ERRFI1/PTPRC/AREG/ENPP2/TREM2/ERBB3/KIT/IL24/IL20/GHR/HCLS1/DMTN/PTPN1/CD36/NTF3/FYN	26	Basal-cell
GO:0006979	response to oxidative stress	40/1229	400/18870	0.00463438	0.0531841	0.0432528	PDLIM1/KRT1/PRNP/GPX1/PTGS1/ALDH3B1/PLEKHA1/APOE/APP/MET/TXNIP/EDN1/ETV5/PTPRK/EPAS1/ATOX1/EDNRA/NDUFA12/WNT16/DHCR24/NET1/CPEB2/AREG/HIF1A/VNN1/GPX8/PLA2R1/SOD3/APOD/MMP2/KAT2B/GPX6/MYB/CD36/CDK1/NCOA7/UCN/TPO/MAPT/FYN	40	Basal-cell
GO:0099003	vesicle-mediated transport in synapse	25/1229	220/18870	0.00475646	0.0544714	0.0442998	CLSTN1/NSG1/SYT8/WNT3A/WNT7A/AP2B1/NLGN4Y/PLD1/CACNB4/ITSN1/STX11/BIN1/STON2/CADPS/NLGN4X/SYNJ2/ATP6V0A1/SCRN1/SYN1/SYT7/STON1/SNCG/PRKCB/DNAJC6/VPS18	25	Basal-cell
GO:0042326	negative regulation of phosphorylation	34/1229	327/18870	0.00477334	0.0545511	0.0443646	PRNP/APOE/SPRED2/DYNLL1/TGFB1/SPRY1/CBLB/BDKRB2/GNAQ/BMP2/PKIB/SPRED1/LRP5/BDKRB1/ERRFI1/IGFBP3/PIK3IP1/SORL1/CDKN1A/PTPRC/DUSP6/DMD/PBK/DMTN/CALM3/PTPN1/NTF3/MICAL1/CHP1/CDKN2C/HHEX/MAPT/MIR711/DEPTOR	34	Basal-cell
GO:0072163	mesonephric epithelium development	14/1229	99/18870	0.00482202	0.0548792	0.0446314	FGFR2/LAMA5/SMAD3/HES1/WNT4/SPRY1/GPC3/GDNF/BMP2/BMP4/NPNT/SOX9/WNT9B/FMN1	14	Basal-cell
GO:0072164	mesonephric tubule development	14/1229	99/18870	0.00482202	0.0548792	0.0446314	FGFR2/LAMA5/SMAD3/HES1/WNT4/SPRY1/GPC3/GDNF/BMP2/BMP4/NPNT/SOX9/WNT9B/FMN1	14	Basal-cell
GO:0072009	nephron epithelium development	16/1229	120/18870	0.00486373	0.054899	0.0446475	DLL1/LAMA5/HES1/WNT4/GPC3/GDNF/BMP2/EDNRA/BMP4/MEF2C/EDNRB/NOTCH2/NPNT/SOX9/WNT9B/FMN1	16	Basal-cell
GO:0007565	female pregnancy	22/1229	186/18870	0.00486534	0.054899	0.0446475	ITGB4/ITGA3/ITGA2/SLC2A1/ACSL4/TIMP1/COL16A1/WNT4/DDR1/VDR/DSG1/EMP2/HPGD/DSG2/ENDOU/TPPP3/MMP2/ARHGDIB/IGFBP7/UCN/CLDN4/HAVCR2	22	Basal-cell
GO:0016202	regulation of striated muscle tissue development	5/1229	18/18870	0.00487369	0.054899	0.0446475	SMAD3/TGFB1/JPH2/BMP4/ERBB3	5	Basal-cell
GO:0035455	response to interferon-alpha	5/1229	18/18870	0.00487369	0.054899	0.0446475	IFITM3/IFITM1/GAS6/IFITM2/MX2	5	Basal-cell
GO:0072087	renal vesicle development	5/1229	18/18870	0.00487369	0.054899	0.0446475	WNT4/GDNF/SOX9/WNT9B/FMN1	5	Basal-cell
GO:0006643	membrane lipid metabolic process	24/1229	209/18870	0.0049122	0.0552196	0.0449082	ALDH3B2/GLTP/ALDH3B1/SCCPDH/ITGB8/CWH43/PGAP2/SGPP2/ACER3/DEGS2/ENPP2/ABCA8/CERS3/KIT/HACD2/B4GALT6/ASAH1/PNPLA1/ELOVL6/CERS1/PSAP/FADS3/GAL3ST1/ST8SIA6	24	Basal-cell
GO:0048659	smooth muscle cell proliferation	21/1229	175/18870	0.00495651	0.0556039	0.0452208	CDH13/FGFR2/ITGA2/NOTCH3/APOE/TGFB1/EDN1/BMP2/THBS1/HPGD/IGFBP3/CDKN1A/CX3CL1/BMP4/MEF2C/ADAMTS1/APOD/PTAFR/MMP2/MYB/BMPR1A	21	Basal-cell
GO:0002763	positive regulation of myeloid leukocyte differentiation	10/1229	60/18870	0.00505501	0.0564423	0.0459027	TGFB1/PPP3CA/IL34/KITLG/ROR2/TREM2/IL20/NOTCH2/HCLS1/TYROBP	10	Basal-cell
GO:0099504	synaptic vesicle cycle	23/1229	198/18870	0.00505637	0.0564423	0.0459027	SYT8/WNT3A/WNT7A/AP2B1/NLGN4Y/PLD1/CACNB4/ITSN1/STX11/BIN1/STON2/CADPS/NLGN4X/SYNJ2/ATP6V0A1/SCRN1/SYN1/SYT7/STON1/SNCG/PRKCB/DNAJC6/VPS18	23	Basal-cell
GO:0030038	contractile actin filament bundle assembly	15/1229	110/18870	0.00509285	0.0564423	0.0459027	PDLIM1/SMAD3/WNT4/MET/ZYX/ARAP1/PHLDB2/ARHGEF10/ARHGEF5/ZEB2/DLC1/TJP1/EVL/BAG4/ARHGEF10L	15	Basal-cell
GO:0030148	sphingolipid biosynthetic process	15/1229	110/18870	0.00509285	0.0564423	0.0459027	ALDH3B2/ALDH3B1/SGPP2/ACER3/DEGS2/ABCA8/CERS3/HACD2/B4GALT6/ASAH1/PNPLA1/ELOVL6/CERS1/GAL3ST1/ST8SIA6	15	Basal-cell
GO:0043149	stress fiber assembly	15/1229	110/18870	0.00509285	0.0564423	0.0459027	PDLIM1/SMAD3/WNT4/MET/ZYX/ARAP1/PHLDB2/ARHGEF10/ARHGEF5/ZEB2/DLC1/TJP1/EVL/BAG4/ARHGEF10L	15	Basal-cell
GO:0045445	myoblast differentiation	15/1229	110/18870	0.00509285	0.0564423	0.0459027	DLL1/ITGB1/NRG1/GPX1/WNT3A/TGFB1/SMARCD3/EPAS1/IGFBP3/BMP4/MEF2C/LGALS1/SOSTDC1/CAPN3/SOX9	15	Basal-cell
GO:0051294	establishment of spindle orientation	8/1229	42/18870	0.00512665	0.0567026	0.0461143	ITGB1/GPSM2/SPRY1/NDC80/SPAG5/KIF25/CENPA/PKHD1	8	Basal-cell
GO:0048675	axon extension	16/1229	121/18870	0.00527531	0.0580464	0.0472072	WNT3/ITGB1/WNT3A/APOE/AUTS2/EDN1/TTL/EDNRA/EDN2/RUFY3/MAP1B/TRPV2/L1CAM/ARHGAP4/MAPT/FN1	16	Basal-cell
GO:0072080	nephron tubule development	14/1229	100/18870	0.00527982	0.0580464	0.0472072	DLL1/LAMA5/HES1/WNT4/GPC3/GDNF/BMP2/BMP4/MEF2C/NOTCH2/NPNT/SOX9/WNT9B/FMN1	14	Basal-cell
GO:2000177	regulation of neural precursor cell proliferation	14/1229	100/18870	0.00527982	0.0580464	0.0472072	FLNA/ITGB1/WNT3A/SMARCD3/CDON/CX3CL1/HIF1A/BCAN/DCT/SOX10/WDR62/LRP2/LIMS2/HAPLN3	14	Basal-cell
GO:0051146	striated muscle cell differentiation	32/1229	305/18870	0.00530838	0.0582439	0.0473678	DLL1/ITGB1/MEF2A/NRG1/GPX1/TNNT1/FHL2/WNT3A/CAV2/EHD2/MYL9/TGFB1/MYOM2/PPP3CA/EDN1/HOPX/CDON/BMP2/NEBL/TNNT3/BMP4/MEF2C/SORT1/MYEF2/TMOD1/SGCD/CAPN3/BMPR1A/CD53/ADAMTS5/CDK1/NFATC2	32	Basal-cell
GO:1905954	positive regulation of lipid localization	15/1229	111/18870	0.0055437	0.060526	0.0492237	DBI/APOE/ABCA1/PLIN2/EDN1/LPCAT3/ACSL1/ABCA8/TREM2/PLA2R1/LPL/CES1/MYB/CD36/SREBF2	15	Basal-cell
GO:0031128	developmental induction	7/1229	34/18870	0.00556042	0.060526	0.0492237	WNT3/WNT4/SPRY1/GDNF/BMP2/BMP4/SOX9	7	Basal-cell
GO:0071398	cellular response to fatty acid	7/1229	34/18870	0.00556042	0.060526	0.0492237	ASS1/HES1/EDN1/CLDN1/PTAFR/LPL/OR51E2	7	Basal-cell
GO:0090162	establishment of epithelial cell polarity	7/1229	34/18870	0.00556042	0.060526	0.0492237	HES1/PTK7/FAT1/FERMT1/FBF1/SIPA1L3/CYTH3	7	Basal-cell
GO:0006929	substrate-dependent cell migration	6/1229	26/18870	0.0056157	0.0607667	0.0494195	ITGA2/SNAI2/SDCBP/PTPRC/STON1/FN1	6	Basal-cell
GO:0033622	integrin activation	6/1229	26/18870	0.0056157	0.0607667	0.0494195	COL16A1/FERMT1/CX3CL1/FERMT3/KIF14/FN1	6	Basal-cell
GO:0060740	prostate gland epithelium morphogenesis	6/1229	26/18870	0.0056157	0.0607667	0.0494195	TP63/FGFR2/TNC/BMP4/MMP2/SOX9	6	Basal-cell
GO:0022407	regulation of cell-cell adhesion	47/1229	493/18870	0.00565518	0.0610737	0.0496692	ASS1/PRNP/PDPN/ASCL2/SOX12/WNT3A/CCL2/DLG5/SLC7A1/HES1/LGALS9B/WNT4/TGFB1/IRF1/EFNB1/PPP3CA/CD276/CBLB/IL20RB/SMARCD3/RUNX3/LGALS9C/BMP2/NRARP/KITLG/CX3CL1/PTPRC/BMP4/VNN1/LGALS1/TJP1/TNFRSF21/GLI2/HLA-DPA1/PTAFR/HLA-DPB1/HLA-DRA/FERMT3/LGALS3/TNFAIP8L2/PIK3R6/PAG1/CD83/SPN/PKHD1/FYN/HAVCR2	47	Basal-cell
GO:0032233	positive regulation of actin filament bundle assembly	10/1229	61/18870	0.00570168	0.0610987	0.0496896	FLNA/SMAD3/WNT4/SYNPO2/ARHGEF10/ARHGEF5/CX3CL1/EVL/BAG4/ARHGEF10L	10	Basal-cell
GO:0055008	cardiac muscle tissue morphogenesis	10/1229	61/18870	0.00570168	0.0610987	0.0496896	FGFR2/NRG1/DSP/TGFB1/BMP2/EDNRA/PKP2/LRP2/BMPR1A/ZFPM2	10	Basal-cell
GO:0060350	endochondral bone morphogenesis	10/1229	61/18870	0.00570168	0.0610987	0.0496896	SERPINH1/TSKU/BMP4/MEF2C/EXT2/GHR/INPPL1/SCX/ANXA6/SOX9	10	Basal-cell
GO:0051170	import into nucleus	20/1229	166/18870	0.00574715	0.0610987	0.0496896	FLNA/SMAD3/TGFB1/TXNIP/CHP2/PPP3CA/CBLB/FERMT1/CDKN1A/BMP4/CRY2/SNUPN/RGPD3/APOD/HCLS1/IL33/EFCAB7/CD36/CDK1/CHP1	20	Basal-cell
GO:0032755	positive regulation of interleukin-6 production	14/1229	101/18870	0.00577197	0.0610987	0.0496896	APP/TGFB1/SPON2/IL1RAP/ADORA2B/PTAFR/IL33/ARID5A/LPL/IL16/CD36/CARD9/UCN/TYROBP	14	Basal-cell
GO:0003207	cardiac chamber formation	4/1229	12/18870	0.00580678	0.0610987	0.0496896	SMARCD3/BMP2/EDNRA/MEF2C	4	Basal-cell
GO:0006705	mineralocorticoid biosynthetic process	4/1229	12/18870	0.00580678	0.0610987	0.0496896	DKK3/WNT4/BMP2/CLCN2	4	Basal-cell
GO:0048484	enteric nervous system development	4/1229	12/18870	0.00580678	0.0610987	0.0496896	GDNF/EDNRA/SOX10/EDNRB	4	Basal-cell
GO:0061309	cardiac neural crest cell development involved in outflow tract morphogenesis	4/1229	12/18870	0.00580678	0.0610987	0.0496896	HES1/EDN1/EDNRA/BMP4	4	Basal-cell
GO:0071635	negative regulation of transforming growth factor beta production	4/1229	12/18870	0.00580678	0.0610987	0.0496896	TSKU/LAPTM4B/TYROBP/FN1	4	Basal-cell
GO:0098911	regulation of ventricular cardiac muscle cell action potential	4/1229	12/18870	0.00580678	0.0610987	0.0496896	DSP/DSG2/BIN1/PKP2	4	Basal-cell
GO:2001046	positive regulation of integrin-mediated signaling pathway	4/1229	12/18870	0.00580678	0.0610987	0.0496896	FLNA/EMP2/LAMC1/LIMS2	4	Basal-cell
GO:0050868	negative regulation of T cell activation	17/1229	133/18870	0.00580791	0.0610987	0.0496896	PRNP/ASCL2/DLG5/LGALS9B/IRF1/CBLB/IL20RB/RUNX3/LGALS9C/NRARP/BMP4/TNFRSF21/LGALS3/TNFAIP8L2/PAG1/SPN/HAVCR2	17	Basal-cell
GO:0007584	response to nutrient	19/1229	155/18870	0.00581311	0.0610987	0.0496896	ASS1/POSTN/ITGA2/GPX1/SNAI2/ABCA1/TNC/VDR/GAS6/MAP1B/PLD1/ACSL1/TYR/SLC16A1/SLC27A4/LPL/KAT2B/PRKCB/BCHE	19	Basal-cell
GO:0051592	response to calcium ion	18/1229	144/18870	0.00583675	0.0612302	0.0497965	MEF2A/SYT8/TXNIP/CHP2/PPP3CA/EDN1/THBS1/CPNE8/TUBA1A/SLC6A1/MEF2C/SYT17/DMTN/CAPN3/CALM3/SYT7/NFATC2/ALOX5AP	18	Basal-cell
GO:0030901	midbrain development	13/1229	91/18870	0.00593738	0.0617927	0.050254	WNT3/FGFR2/WLS/WNT3A/DLG5/HES1/DYNLL1/CKB/FZD6/CALM3/PLP1/WNT9B/PADI2	13	Basal-cell
GO:0002269	leukocyte activation involved in inflammatory response	9/1229	52/18870	0.00594121	0.0617927	0.050254	APP/IFNGR1/NR1D1/CX3CL1/PTPRC/TREM2/IL33/TYROBP/MAPT	9	Basal-cell
GO:0099172	presynapse organization	9/1229	52/18870	0.00594121	0.0617927	0.050254	WNT3A/WNT7A/APP/IL1RAP/SDCBP/NLGN4Y/SLITRK6/NLGN4X/SLITRK2	9	Basal-cell
GO:0060443	mammary gland morphogenesis	8/1229	43/18870	0.00594658	0.0617927	0.050254	FGFR2/WNT4/DDR1/VDR/LRP5/AREG/BMP4/SOSTDC1	8	Basal-cell
GO:0090317	negative regulation of intracellular protein transport	8/1229	43/18870	0.00594658	0.0617927	0.050254	FERMT1/SVIP/BAG4/APOD/DMTN/CD36/CHP1/RANGAP1	8	Basal-cell
GO:0007405	neuroblast proliferation	12/1229	81/18870	0.0060095	0.0623287	0.0506899	FGFR2/ITGB1/WNT3A/SMARCD3/CDON/CX3CL1/HIF1A/BCAN/DCT/SOX10/WDR62/HAPLN3	12	Basal-cell
GO:0001503	ossification	43/1229	444/18870	0.00602621	0.0623843	0.0507351	WNT3/GDPD2/TP63/FGFR2/MIR205/SNAI2/IFITM1/FHL2/WNT3A/ASPN/SMAD3/WNT4/TNC/PPP3CA/SLC20A2/VDR/COL5A2/RUNX3/GPC3/KREMEN2/ATP2B1/ANKH/BMP2/LRP5/ROR2/IGFBP3/AREG/HIF1A/BMP4/MEF2C/EXT2/SORT1/LRP3/GLI2/MMP2/INPPL1/NPNT/SCX/SRGN/BMPR1A/SOX9/COL1A2/SLC24A3	43	Basal-cell
GO:0048639	positive regulation of developmental growth	20/1229	167/18870	0.0061412	0.0634552	0.051606	WNT3/DLL1/FGFR2/WNT3A/EDN1/HOPX/CRABP2/RUFY3/MAP1B/MEF2C/GHR/TRPV2/SYT17/L1CAM/CAPN3/BMPR1A/CDK1/ZFPM2/MAPT/FN1	20	Basal-cell
GO:1903037	regulation of leukocyte cell-cell adhesion	38/1229	382/18870	0.00618279	0.0634751	0.0516221	ASS1/PRNP/ASCL2/SOX12/CCL2/DLG5/SLC7A1/HES1/LGALS9B/IRF1/EFNB1/PPP3CA/CD276/CBLB/IL20RB/SMARCD3/RUNX3/LGALS9C/NRARP/KITLG/PTPRC/BMP4/VNN1/LGALS1/TNFRSF21/GLI2/HLA-DPA1/PTAFR/HLA-DPB1/HLA-DRA/LGALS3/TNFAIP8L2/PIK3R6/PAG1/CD83/SPN/FYN/HAVCR2	38	Basal-cell
GO:0007613	memory	16/1229	123/18870	0.00618335	0.0634751	0.0516221	ITGA3/CCND2/PRNP/APOE/NTF4/SERPINF1/GRIN2A/TUBA1A/SLC6A1/TREM2/S100B/BRINP1/KAT2B/HRH1/NTF3/MAPT	16	Basal-cell
GO:0044772	mitotic cell cycle phase transition	45/1229	470/18870	0.00618802	0.0634751	0.0516221	CCND2/ZFP36L2/ITGB1/HSPA2/NFIB/RBBP8/CCL2/APP/XPC/FHL1/PPP3CA/SMARCD3/BCL7A/BACH1/CDK18/PIAS1/CACNB4/CDKN1A/CCNG2/CDK15/CCDC57/ADAMTS1/RRM2/TACC3/TTK/ANLN/CCND1/CDC20/SPC25/CDKN3/NUF2/NDC80/CDCA8/SPC24/BLM/UBE2C/CALM3/BCAT1/BUB1B/FOXM1/IQGAP3/CDK1/KIF14/CDKN2C/BRCA1	45	Basal-cell
GO:0030900	forebrain development	40/1229	407/18870	0.00619522	0.0634751	0.0516221	FLNA/FGFR2/SLC2A1/NOTCH3/NFIB/WNT3A/WNT7A/TSKU/APP/HES1/WNT4/NTRK2/CDON/ANXA3/BMP2/TUBB2A/NHLH2/TUBA1A/UBA6/HIF1A/BMP4/DLC1/BCAN/DCT/TACC3/GLI2/SYNE2/FOXP2/SLC1A2/WDR62/LRP2/EFHC1/TUBB2B/BMPR1A/TMEM108/SRGAP2/CCDC85C/KIF14/TYROBP/FYN	40	Basal-cell
GO:0006816	calcium ion transport	43/1229	445/18870	0.00626424	0.0634751	0.0516221	FLNA/PRNP/WNT3A/CCL2/HES1/PPP3CA/EDN1/ORAI3/VDR/GAS6/ATP2B1/PSEN2/GRIN2A/EDNRA/BSPRY/JPH2/BDKRB1/BEST1/CACNB4/CX3CL1/PTPRC/SLC24A5/BIN1/EDNRB/TRPV2/CSN2/DMD/IL16/LGALS3/CAPN3/CALM3/PANX1/ANXA6/PLP1/PRKCB/UCN/PIK3CG/CAMK2B/TRPM1/MICU3/SLC24A3/FYN/ANXA9	43	Basal-cell
GO:0015810	aspartate transmembrane transport	5/1229	19/18870	0.0062646	0.0634751	0.0516221	SLC1A3/SLC1A5/LRRC8D/SLC1A4/SLC1A2	5	Basal-cell
GO:0045618	positive regulation of keratinocyte differentiation	5/1229	19/18870	0.0062646	0.0634751	0.0516221	ALOX15B/VDR/TRIM16/IL20/ETV4	5	Basal-cell
GO:0055070	copper ion homeostasis	5/1229	19/18870	0.0062646	0.0634751	0.0516221	PRNP/APP/MT2A/ATOX1/SLC31A2	5	Basal-cell
GO:0061298	retina vasculature development in camera-type eye	5/1229	19/18870	0.0062646	0.0634751	0.0516221	LRP5/HIF1A/COL4A1/VSTM4/FZD4	5	Basal-cell
GO:0071625	vocalization behavior	5/1229	19/18870	0.0062646	0.0634751	0.0516221	MYH14/NLGN4Y/BRINP1/NLGN4X/NRXN3	5	Basal-cell
GO:0042552	myelination	18/1229	145/18870	0.00627014	0.0634751	0.0516221	ITGB4/NTRK2/MARVELD1/MAL2/ARHGEF10/PMP22/ACER3/TMEM98/TENM4/SOX10/TNFRSF21/CNTN1/B4GALT6/MAL/PLP1/KIF14/GAL3ST1/TSPAN2	18	Basal-cell
GO:0002027	regulation of heart rate	14/1229	102/18870	0.00630026	0.0636627	0.0517747	DSP/KCNJ2/EDN1/EPAS1/SCN4B/EDNRA/EDN2/DSG2/BIN1/EDNRB/DMD/PKP2/KCNE4/CALM3	14	Basal-cell
GO:0006909	phagocytosis	26/1229	237/18870	0.00641004	0.0644763	0.0524364	ITGB1/ITGA2/MST1R/CCL2/ABCA1/MET/SPON2/IL2RB/GAS6/CNN2/ANXA3/VAV2/THBS1/RAB31/PTPRC/TREM2/RAB27A/GULP1/SRPX/GSN/CD36/SYT7/TYROBP/ELMO1/BIN2/FYN	26	Basal-cell
GO:0022617	extracellular matrix disassembly	10/1229	62/18870	0.00641111	0.0644763	0.0524364	PDPN/CST3/TGFB1/KLK5/DDR1/TMPRSS6/LAMC1/MMP2/ADAMTS5/ADAMTS4	10	Basal-cell
GO:1990138	neuron projection extension	21/1229	179/18870	0.00641596	0.0644763	0.0524364	WNT3/POSTN/ITGB1/WNT3A/APOE/DDR1/AUTS2/EDN1/TTL/EDNRA/EDN2/RUFY3/MAP1B/S100B/TRPV2/SYT17/L1CAM/ARHGAP4/TMEM108/MAPT/FN1	21	Basal-cell
GO:0001738	morphogenesis of a polarized epithelium	13/1229	92/18870	0.00651332	0.0650497	0.0529027	TP63/LAMA5/DLG5/WNT7A/PTK7/FAT1/CELSR1/GRHL3/GPC3/DAAM1/FZD6/WNT9B/PKHD1	13	Basal-cell
GO:0032355	response to estradiol	15/1229	113/18870	0.00654201	0.0650497	0.0529027	ASS1/POSTN/ITGA2/GPX1/WNT7A/NCOR2/TGFB1/TXNIP/HPGD/MAP1B/SLC6A1/AREG/MMP2/UCN/SOCS2	15	Basal-cell
GO:0050731	positive regulation of peptidyl-tyrosine phosphorylation	20/1229	168/18870	0.0065571	0.0650497	0.0529027	PRNP/HES1/TGFB1/TNFRSF18/IL34/KITLG/PTPRC/AREG/ENPP2/TREM2/ERBB3/KIT/IL24/IL20/GHR/HCLS1/PTPN1/CD36/NTF3/FYN	20	Basal-cell
GO:0000038	very long-chain fatty acid metabolic process	7/1229	35/18870	0.00656769	0.0650497	0.0529027	SLC27A6/ACSL1/HACD2/TECRL/SLC27A4/SLC27A5/ELOVL6	7	Basal-cell
GO:0030947	regulation of vascular endothelial growth factor receptor signaling pathway	7/1229	35/18870	0.00656769	0.0650497	0.0529027	DLL1/HIF1A/PTPN1/PRKCB/HHEX/MMRN2/FZD4	7	Basal-cell
GO:0032633	interleukin-4 production	7/1229	35/18870	0.00656769	0.0650497	0.0529027	SLC7A5/IL20RB/IL1RAP/PRG2/IL33/CD83/HAVCR2	7	Basal-cell
GO:0032673	regulation of interleukin-4 production	7/1229	35/18870	0.00656769	0.0650497	0.0529027	SLC7A5/IL20RB/IL1RAP/PRG2/IL33/CD83/HAVCR2	7	Basal-cell
GO:0070633	transepithelial transport	7/1229	35/18870	0.00656769	0.0650497	0.0529027	SLC1A3/EDN1/BEST1/EDNRB/SLC1A2/SLC26A6/ABCC2	7	Basal-cell
GO:0045787	positive regulation of cell cycle	34/1229	334/18870	0.00658138	0.0650681	0.0529177	CCND2/SMOC2/FGFR2/HSPA2/LFNG/GPSM2/APP/HES1/WNT4/EDN1/SMARCD3/TTL/LRP5/CCDC57/ADAMTS1/RRM2/PSRC1/CIT/NCAPH/KIF23/CCND1/CDC20/NDC80/CDCA8/KAT2B/UBE2C/SPAG5/KIF20B/CDK1/PLK4/KIF14/NUSAP1/MEIS2/DYRK3	34	Basal-cell
GO:0014823	response to activity	11/1229	72/18870	0.00661821	0.0653147	0.0531183	POSTN/ITGA2/SLC7A5/EDN1/METRNL/HIF1A/PERM1/CRY2/MMP2/CAPN3/CDK1	11	Basal-cell
GO:0021543	pallium development	22/1229	191/18870	0.00664146	0.0654268	0.0532094	FLNA/SLC2A1/WNT3A/TSKU/NTRK2/CDON/ANXA3/TUBB2A/TUBA1A/UBA6/HIF1A/BCAN/TACC3/SYNE2/FOXP2/WDR62/EFHC1/TUBB2B/TMEM108/SRGAP2/CCDC85C/KIF14	22	Basal-cell
GO:0019932	second-messenger-mediated signaling	32/1229	310/18870	0.0067256	0.0659786	0.0536582	CDH13/PRNP/ACKR3/FHL2/APOE/DEFB1/CHP2/PPP3CA/EDN1/GRIN2A/THBS1/EDN2/PDE7A/PTPRC/TREM2/ERBB3/ADORA2B/EDNRB/DMD/GPR143/SGCD/DMTN/CALM3/AHR/CD36/SOX9/OR51E2/NFATC2/UCN/KSR1/CHP1/MAPT	32	Basal-cell
GO:0045778	positive regulation of ossification	9/1229	53/18870	0.00675272	0.0659786	0.0536582	SMAD3/WNT4/SLC20A2/VDR/ATP2B1/BMP2/BMP4/MEF2C/BMPR1A	9	Basal-cell
GO:0086002	cardiac muscle cell action potential involved in contraction	9/1229	53/18870	0.00675272	0.0659786	0.0536582	FLNA/DSP/KCNJ2/SCN4B/DSG2/BIN1/PKP2/KCNE4/KCNN2	9	Basal-cell
GO:0090175	regulation of establishment of planar polarity	9/1229	53/18870	0.00675272	0.0659786	0.0536582	WNT7A/PTK7/CELSR1/GRHL3/GPC3/DAAM1/FZD6/WNT9B/PKHD1	9	Basal-cell
GO:0015740	C4-dicarboxylate transport	6/1229	27/18870	0.00682951	0.0659786	0.0536582	SLC1A3/SLC1A5/LRRC8D/SLC1A4/SLC16A1/SLC1A2	6	Basal-cell
GO:0021846	cell proliferation in forebrain	6/1229	27/18870	0.00682951	0.0659786	0.0536582	FGFR2/NFIB/WNT3A/WNT7A/DCT/KIF14	6	Basal-cell
GO:0022010	central nervous system myelination	6/1229	27/18870	0.00682951	0.0659786	0.0536582	TENM4/SOX10/CNTN1/B4GALT6/MAL/PLP1	6	Basal-cell
GO:0032291	axon ensheathment in central nervous system	6/1229	27/18870	0.00682951	0.0659786	0.0536582	TENM4/SOX10/CNTN1/B4GALT6/MAL/PLP1	6	Basal-cell
GO:0032753	positive regulation of interleukin-4 production	6/1229	27/18870	0.00682951	0.0659786	0.0536582	SLC7A5/IL20RB/IL1RAP/PRG2/IL33/HAVCR2	6	Basal-cell
GO:0045940	positive regulation of steroid metabolic process	6/1229	27/18870	0.00682951	0.0659786	0.0536582	APOE/WNT4/NR1D1/STAR/CES1/SREBF2	6	Basal-cell
GO:0150146	cell junction disassembly	6/1229	27/18870	0.00682951	0.0659786	0.0536582	ITGB1/SNAI2/PLXNC1/CX3CL1/TREM2/STON1	6	Basal-cell
GO:0006509	membrane protein ectodomain proteolysis	8/1229	44/18870	0.00686243	0.0659881	0.0536659	ERAP1/APOE/TIMP1/RGMA/PSEN2/SPPL2A/TIMP2/SNX33	8	Basal-cell
GO:0032689	negative regulation of type II interferon production	8/1229	44/18870	0.00686243	0.0659881	0.0536659	PRNP/LGALS9B/IL20RB/GAS6/LGALS9C/PGLYRP3/IL33/HAVCR2	8	Basal-cell
GO:0001823	mesonephros development	14/1229	103/18870	0.00686651	0.0659881	0.0536659	FGFR2/LAMA5/SMAD3/HES1/WNT4/SPRY1/GPC3/GDNF/BMP2/BMP4/NPNT/SOX9/WNT9B/FMN1	14	Basal-cell
GO:0051250	negative regulation of lymphocyte activation	20/1229	169/18870	0.00699571	0.0671125	0.0545803	PRNP/ASCL2/DLG5/LGALS9B/IRF1/CBLB/IL20RB/RUNX3/LGALS9C/NRARP/BMP4/PGLYRP3/TNFRSF21/PARP3/LGALS3/TNFAIP8L2/PAG1/TYROBP/SPN/HAVCR2	20	Basal-cell
GO:0018958	phenol-containing compound metabolic process	15/1229	114/18870	0.00709262	0.0679235	0.0552399	MOXD1/EPAS1/OCA2/GRIN2A/EDNRA/PDE1B/SLC24A5/ZEB2/MC1R/DCT/TYR/PMEL/TYRP1/DUOXA1/TPO	15	Basal-cell
GO:0098754	detoxification	19/1229	158/18870	0.00712707	0.0680603	0.0553512	GPX1/PTGS1/APOE/SLC47A2/MT2A/GSTM3/MT1E/TXNDC17/GSTM1/RDH12/SLC47A1/AKR1B10/GPX8/SOD3/GPX6/MT1G/CD36/ALOX5AP/TPO	19	Basal-cell
GO:1900182	positive regulation of protein localization to nucleus	13/1229	93/18870	0.00713275	0.0680603	0.0553512	FLNA/SMAD3/TGFB1/CHP2/LIMK2/NGFR/CACNB4/CARD10/BMP4/HCLS1/EFCAB7/CDK1/FYN	13	Basal-cell
GO:0010959	regulation of metal ion transport	39/1229	398/18870	0.00714404	0.0680603	0.0553512	FLNA/ATP1B3/ITGB1/PRNP/CCL2/HES1/KCNJ2/FHL1/CHP2/PPP3CA/ATP2B1/PSEN2/KCNS1/SCN4B/JPH2/BDKRB1/BEST1/CACNB4/CX3CL1/SLC31A2/TREM2/BIN1/CNTN1/TRPV2/DMD/PKP2/GNB2/IL16/LGALS3/KCNE4/CAPN3/CALM3/PLP1/KCNN2/UCN/PIK3CG/CAMK2B/CHP1/FYN	39	Basal-cell
GO:0051784	negative regulation of nuclear division	10/1229	63/18870	0.00718722	0.0682672	0.0555194	TOM1L2/BMP4/TTK/CDC20/SPC25/NUF2/NDC80/CDCA8/SPC24/BUB1B	10	Basal-cell
GO:0007272	ensheathment of neurons	18/1229	147/18870	0.00721543	0.0682672	0.0555194	ITGB4/NTRK2/MARVELD1/MAL2/ARHGEF10/PMP22/ACER3/TMEM98/TENM4/SOX10/TNFRSF21/CNTN1/B4GALT6/MAL/PLP1/KIF14/GAL3ST1/TSPAN2	18	Basal-cell
GO:0008366	axon ensheathment	18/1229	147/18870	0.00721543	0.0682672	0.0555194	ITGB4/NTRK2/MARVELD1/MAL2/ARHGEF10/PMP22/ACER3/TMEM98/TENM4/SOX10/TNFRSF21/CNTN1/B4GALT6/MAL/PLP1/KIF14/GAL3ST1/TSPAN2	18	Basal-cell
GO:0035150	regulation of tube size	18/1229	147/18870	0.00721543	0.0682672	0.0555194	GPX1/APOE/EDN1/BDKRB2/ATP2B1/EDNRA/EDN2/PLOD3/EXT2/ADORA2B/EDNRB/SOD3/MMP2/KAT2B/HRH1/VSTM4/WNT9B/UCN	18	Basal-cell
GO:0001570	vasculogenesis	12/1229	83/18870	0.0073076	0.0686744	0.0558506	ACKR3/CCM2/WNT7A/TGFB1/NTRK2/ITGB8/EMP2/RRAS/SPRED1/HEY1/ZFPM2/FZD4	12	Basal-cell
GO:0019935	cyclic-nucleotide-mediated signaling	12/1229	83/18870	0.0073076	0.0686744	0.0558506	APOE/DEFB1/THBS1/PDE7A/ADORA2B/EDNRB/AHR/CD36/SOX9/OR51E2/UCN/KSR1	12	Basal-cell
GO:0035023	regulation of Rho protein signal transduction	12/1229	83/18870	0.0073076	0.0686744	0.0558506	ITGA3/ITGB1/APOE/ABCA1/MET/LPAR6/NET1/ARHGEF28/DLC1/KCTD10/ARHGDIB/EPS8L1	12	Basal-cell
GO:0002067	glandular epithelial cell differentiation	11/1229	73/18870	0.00734592	0.0686744	0.0558506	DLL1/TP63/FGFR2/NFIB/HES1/WNT4/BMP2/HIF1A/BMP4/CLCN2/SOX9	11	Basal-cell
GO:0003170	heart valve development	11/1229	73/18870	0.00734592	0.0686744	0.0558506	SNAI2/TGFB1/BMP2/BMP4/MEF2C/NOTCH2/HEY1/SCX/BMPR1A/ADAMTS5/SOX9	11	Basal-cell
GO:0032732	positive regulation of interleukin-1 production	11/1229	73/18870	0.00734592	0.0686744	0.0558506	SMAD3/APP/GSDMD/TRIM16/SAA1/LPL/IL16/CD36/PANX1/TYROBP/HAVCR2	11	Basal-cell
GO:0050818	regulation of coagulation	11/1229	73/18870	0.00734592	0.0686744	0.0558506	KRT1/PDGFA/APOE/EDN1/PROS1/SERPING1/THBS1/PROCR/DMTN/VKORC1/CD36	11	Basal-cell
GO:0044706	multi-multicellular organism process	24/1229	216/18870	0.00736332	0.0687202	0.0558878	ITGB4/ITGA3/ITGA2/SLC2A1/ACSL4/TIMP1/COL16A1/WNT4/DDR1/EDN1/VDR/DSG1/EMP2/HPGD/DSG2/ENDOU/TPPP3/PTAFR/MMP2/ARHGDIB/IGFBP7/UCN/CLDN4/HAVCR2	24	Basal-cell
GO:0032642	regulation of chemokine production	14/1229	104/18870	0.0074726	0.069504	0.0565253	POSTN/SNAI2/APP/TGFB1/ALOX15B/HIF1A/TREM2/ADORA2B/APOD/IL33/LPL/CARD9/SIGIRR/HAVCR2	14	Basal-cell
GO:0033045	regulation of sister chromatid segregation	14/1229	104/18870	0.0074726	0.069504	0.0565253	SMARCD3/BCL7A/TACC3/TTK/CDC20/SPC25/NUF2/NDC80/CDCA8/SPC24/KAT2B/UBE2C/BUB1B/CDK1	14	Basal-cell
GO:0062012	regulation of small molecule metabolic process	34/1229	337/18870	0.00751528	0.069783	0.0567522	DKK3/SNAI2/APOE/APP/NCOR2/WNT4/ADIPOR1/LPCAT3/FMO1/BMP2/PMAIP1/ME2/NR1D1/IGFBP3/HIF1A/TREM2/SLC45A3/KIT/FABP5/STAR/CLCN2/PTAFR/GAPDHS/CES1/KAT2B/PPTC7/HRH1/EPHX2/SOX9/TFF3/SREBF2/SERPINA12/GNMT/BRCA1	34	Basal-cell
GO:0018108	peptidyl-tyrosine phosphorylation	29/1229	276/18870	0.00754103	0.069904	0.0568506	EFEMP1/FGFR2/PDGFA/PDGFC/PRNP/APP/HES1/TGFB1/TNFRSF18/DDR1/CBLB/IL34/KITLG/ERRFI1/PTPRC/AREG/ENPP2/TREM2/ERBB3/KIT/IL24/IL20/GHR/HCLS1/DMTN/PTPN1/CD36/NTF3/FYN	29	Basal-cell
GO:0060041	retina development in camera-type eye	19/1229	159/18870	0.00761515	0.0704069	0.0572596	DLL1/FJX1/NFIB/HES1/NTRK2/TGIF2/SERPINF1/SMARCD3/CDON/PTPRM/LRP5/HIF1A/LPCAT1/CLCN2/SDK2/COL4A1/VSTM4/SOX9/FZD4	19	Basal-cell
GO:0010761	fibroblast migration	9/1229	54/18870	0.00764652	0.0704069	0.0572596	PDLIM1/ITGB1/TGFB1/THBS1/ZEB2/AKAP12/BAG4/ARHGAP4/DMTN	9	Basal-cell
GO:0060425	lung morphogenesis	9/1229	54/18870	0.00764652	0.0704069	0.0572596	FGFR2/NFIB/DLG5/TNC/SPRY1/CELSR1/BMP4/PLOD3/SOX9	9	Basal-cell
GO:0070169	positive regulation of biomineral tissue development	9/1229	54/18870	0.00764652	0.0704069	0.0572596	SMAD3/WNT4/SLC20A2/VDR/ATP2B1/BMP2/BMP4/MEF2C/BMPR1A	9	Basal-cell
GO:0033559	unsaturated fatty acid metabolic process	15/1229	115/18870	0.00767968	0.070594	0.0574117	GPX1/PTGS1/CBR1/ALOX15B/EDN1/CYP2S1/SCD/GSTM1/EDN2/HPGD/CYP2U1/FADS1/FABP5/ELOVL6/FADS3	15	Basal-cell
GO:0006575	cellular modified amino acid metabolic process	16/1229	126/18870	0.00777811	0.0712604	0.0579537	ASS1/GAMT/SLC6A8/BBOX1/PRODH/SLC27A1/LPCAT3/GATM/CKB/FPGS/VNN1/PLOD3/CRAT/DUOXA1/TPO/GNMT	16	Basal-cell
GO:0043200	response to amino acid	16/1229	126/18870	0.00777811	0.0712604	0.0579537	ASS1/PDGFC/COL16A1/COL4A6/NTRK2/SLC7A5/EDN1/COL5A2/TUBA1A/LAMTOR4/CPEB4/SLC1A2/MMP2/COL4A1/COL1A2/FYN	16	Basal-cell
GO:0071229	cellular response to acid chemical	13/1229	94/18870	0.0077979	0.0713229	0.0580045	ASS1/PDGFC/COL16A1/COL4A6/NTRK2/SLC7A5/COL5A2/LAMTOR4/CPEB4/MMP2/COL4A1/COL1A2/FYN	13	Basal-cell
GO:0060749	mammary gland alveolus development	5/1229	20/18870	0.00791202	0.0716141	0.0582414	DDR1/AREG/HIF1A/CCND1/SOCS2	5	Basal-cell
GO:0061377	mammary gland lobule development	5/1229	20/18870	0.00791202	0.0716141	0.0582414	DDR1/AREG/HIF1A/CCND1/SOCS2	5	Basal-cell
GO:0035331	negative regulation of hippo signaling	4/1229	13/18870	0.00796002	0.0716141	0.0582414	AJUBA/DLG5/CIT/WTIP	4	Basal-cell
GO:0036006	cellular response to macrophage colony-stimulating factor stimulus	4/1229	13/18870	0.00796002	0.0716141	0.0582414	MST1R/PDE1B/TREM2/DOK1	4	Basal-cell
GO:0038180	nerve growth factor signaling pathway	4/1229	13/18870	0.00796002	0.0716141	0.0582414	NTF4/RAPGEF1/SORT1/NTF3	4	Basal-cell
GO:0060100	positive regulation of phagocytosis, engulfment	4/1229	13/18870	0.00796002	0.0716141	0.0582414	ITGA2/RAB31/TREM2/CD36	4	Basal-cell
GO:0061517	macrophage proliferation	4/1229	13/18870	0.00796002	0.0716141	0.0582414	IL34/CX3CL1/TREM2/IL33	4	Basal-cell
GO:0090235	regulation of metaphase plate congression	4/1229	13/18870	0.00796002	0.0716141	0.0582414	TTL/CDCA8/KAT2B/SPAG5	4	Basal-cell
GO:1900272	negative regulation of long-term synaptic potentiation	4/1229	13/18870	0.00796002	0.0716141	0.0582414	PRNP/APOE/APP/TYROBP	4	Basal-cell
GO:1905155	positive regulation of membrane invagination	4/1229	13/18870	0.00796002	0.0716141	0.0582414	ITGA2/RAB31/TREM2/CD36	4	Basal-cell
GO:0032602	chemokine production	14/1229	105/18870	0.00812043	0.0729379	0.059318	POSTN/SNAI2/APP/TGFB1/ALOX15B/HIF1A/TREM2/ADORA2B/APOD/IL33/LPL/CARD9/SIGIRR/HAVCR2	14	Basal-cell
GO:0035116	embryonic hindlimb morphogenesis	6/1229	28/18870	0.00822251	0.0735071	0.0597809	WNT3/TP63/WNT7A/GPC3/BMP4/AFF3	6	Basal-cell
GO:0060512	prostate gland morphogenesis	6/1229	28/18870	0.00822251	0.0735071	0.0597809	TP63/FGFR2/TNC/BMP4/MMP2/SOX9	6	Basal-cell
GO:0070374	positive regulation of ERK1 and ERK2 cascade	24/1229	218/18870	0.00822392	0.0735071	0.0597809	FGFR2/PDGFA/PDGFC/NRG1/ACKR3/APOE/CCL2/APP/TGFB1/GAS6/TPBG/BMP2/CX3CL1/PTPRC/BMP4/TREM2/GLIPR2/AKAP12/NOTCH2/SHC1/NPNT/CD36/CARD9/HAVCR2	24	Basal-cell
GO:0043491	phosphatidylinositol 3-kinase/protein kinase B signal transduction	30/1229	290/18870	0.0082459	0.073584	0.0598434	PDGFA/ITGB1/PDGFC/MST1R/GPX1/DCN/PLEKHA1/TGFB1/NTRK2/DDR1/EDN1/GAS6/TPBG/RRAS/THBS1/WNT16/ROR2/PIK3IP1/CX3CL1/MC1R/TREM2/ERBB3/KIT/BAG4/HCLS1/LRP2/SOX9/PIK3CG/PKHD1/FN1	30	Basal-cell
GO:0031960	response to corticosteroid	18/1229	149/18870	0.0082728	0.0735851	0.0598443	ASS1/ZFP36L2/SERPINF1/EDN1/ANXA3/SCNN1A/CDKN1A/PTPRC/AREG/FIBIN/GHR/CLDN1/PTAFR/TRIM63/IGFBP7/CARD9/UCN/BCHE	18	Basal-cell
GO:0046467	membrane lipid biosynthetic process	18/1229	149/18870	0.0082728	0.0735851	0.0598443	ALDH3B2/ALDH3B1/SCCPDH/CWH43/PGAP2/SGPP2/ACER3/DEGS2/ABCA8/CERS3/HACD2/B4GALT6/ASAH1/PNPLA1/ELOVL6/CERS1/GAL3ST1/ST8SIA6	18	Basal-cell
GO:0018212	peptidyl-tyrosine modification	29/1229	278/18870	0.00830553	0.0737568	0.059984	EFEMP1/FGFR2/PDGFA/PDGFC/PRNP/APP/HES1/TGFB1/TNFRSF18/DDR1/CBLB/IL34/KITLG/ERRFI1/PTPRC/AREG/ENPP2/TREM2/ERBB3/KIT/IL24/IL20/GHR/HCLS1/DMTN/PTPN1/CD36/NTF3/FYN	29	Basal-cell
GO:0021987	cerebral cortex development	16/1229	127/18870	0.0083774	0.0742751	0.0604055	FLNA/SLC2A1/NTRK2/CDON/TUBB2A/TUBA1A/HIF1A/TACC3/SYNE2/FOXP2/WDR62/EFHC1/TUBB2B/SRGAP2/CCDC85C/KIF14	16	Basal-cell
GO:1902930	regulation of alcohol biosynthetic process	9/1229	55/18870	0.00862774	0.0763715	0.0621104	DKK3/APOE/WNT4/LPCAT3/BMP2/CLCN2/PTAFR/HRH1/SREBF2	9	Basal-cell
GO:0060047	heart contraction	26/1229	243/18870	0.00878631	0.0775382	0.0630592	FLNA/MEF2A/GPX1/DSP/KCNJ2/TNNI2/EDN1/HOPX/EPAS1/ATP2B1/SCN4B/EDNRA/EDN2/DSG2/EXT2/BIN1/EDNRB/DMD/PKP2/SGCD/KCNE4/CALM3/GSN/KCNN2/UCN/PIK3CG	26	Basal-cell
GO:0003015	heart process	27/1229	255/18870	0.00878776	0.0775382	0.0630592	FLNA/MEF2A/GPX1/DSP/KCNJ2/TNNI2/EDN1/HOPX/EPAS1/ATP2B1/SCN4B/EDNRA/EDN2/DSG2/EXT2/BIN1/EDNRB/DMD/PKP2/SGCD/KCNE4/CALM3/GSN/KCNN2/UCN/PIK3CG/FYN	27	Basal-cell
GO:0006865	amino acid transport	18/1229	150/18870	0.00884636	0.0778055	0.0632766	SLC38A5/ITGB1/SLC6A8/SLC1A3/SLC7A1/NTRK2/SLC7A5/SLC43A1/SLC1A5/LRRC8D/SLC47A1/SLC25A38/LRP5/SLC1A4/CACNB4/SLC6A1/SLC38A4/SLC1A2	18	Basal-cell
GO:0045667	regulation of osteoblast differentiation	18/1229	150/18870	0.00884636	0.0778055	0.0632766	GDPD2/TP63/FGFR2/MIR205/SNAI2/IFITM1/SMAD3/WNT4/PPP3CA/BMP2/LRP5/AREG/BMP4/MEF2C/LRP3/NPNT/BMPR1A/SOX9	18	Basal-cell
GO:0099173	postsynapse organization	22/1229	196/18870	0.00891777	0.0783083	0.0636855	ITGA3/PRNP/LAMA5/APOE/DLG5/WNT7A/NGEF/IL1RAP/SPTBN2/GDNF/ACTN1/NLGN4Y/ROR2/TREM2/RPS6KA5/NLGN4X/ARHGAP22/CNKSR2/SRGN/TMEM108/CAMK2B/FYN	22	Basal-cell
GO:0007094	mitotic spindle assembly checkpoint signaling	8/1229	46/18870	0.00900876	0.078605	0.0639269	TTK/CDC20/SPC25/NUF2/NDC80/CDCA8/SPC24/BUB1B	8	Basal-cell
GO:0071173	spindle assembly checkpoint signaling	8/1229	46/18870	0.00900876	0.078605	0.0639269	TTK/CDC20/SPC25/NUF2/NDC80/CDCA8/SPC24/BUB1B	8	Basal-cell
GO:0071174	mitotic spindle checkpoint signaling	8/1229	46/18870	0.00900876	0.078605	0.0639269	TTK/CDC20/SPC25/NUF2/NDC80/CDCA8/SPC24/BUB1B	8	Basal-cell
GO:1990090	cellular response to nerve growth factor stimulus	8/1229	46/18870	0.00900876	0.078605	0.0639269	HES1/NTRK2/NTF4/RAPGEF1/SORT1/TMEM108/NTF3/MAPT	8	Basal-cell
GO:0032970	regulation of actin filament-based process	37/1229	379/18870	0.00912547	0.0794894	0.0646461	FLNA/PDGFA/PDPN/LIMA1/SMAD3/DSP/WNT4/KCNJ2/MET/SYNPO2/CELSR1/EDN1/CNN2/ARAP1/PHLDB2/GRHL3/SPTBN2/ARHGEF10/CDC42EP4/DSG2/ARHGEF5/CX3CL1/PREX1/ZEB2/DLC1/TJP1/BIN1/EVL/BAG4/TMOD1/ARHGEF10L/HCLS1/PKP2/DMTN/SCIN/GSN/FMN1	37	Basal-cell
GO:0007517	muscle organ development	35/1229	354/18870	0.00913905	0.0794894	0.0646461	ASS1/DLL1/FGFR2/ITGB1/LAMA5/MEF2A/NRG1/GPX1/WNT3A/CAV2/SMAD3/DSP/TGFB1/FHL1/MYOM2/PPP3CA/KY/MYH14/CDON/BMP2/EDNRA/JPH2/SGCE/BMP4/MEF2C/ERBB3/PAX3/DMD/PKP2/SGCD/LRP2/CAPN3/SCX/BMPR1A/ZFPM2	35	Basal-cell
GO:1903706	regulation of hemopoiesis	40/1229	417/18870	0.00917578	0.0796828	0.0648034	DLL1/ZFP36L2/ASCL2/SOX12/SNAI2/TGFB1/IRF1/PPP3CA/MITF/SMARCD3/HOXA7/GAS6/FOXN1/RUNX3/HOXA9/IL34/NRARP/KITLG/ROR2/PTPRC/HIF1A/BMP4/VNN1/PGLYRP3/MEF2C/TREM2/IL20/GLI2/KAT6B/NOTCH2/HCLS1/HLA-DRA/MYB/PIK3R6/SCIN/BATF/TYROBP/CD83/NFAM1/MEIS2	40	Basal-cell
GO:0001890	placenta development	18/1229	151/18870	0.00945138	0.0819467	0.0666445	FGFR2/HTRA1/ASCL2/HES1/VDR/ST14/EPAS1/ITGB8/PLCD3/HIF1A/TPPP3/NOTCH2/HEY1/HS6ST1/PLK4/ETV2/LHX4/DLX3	18	Basal-cell
GO:0009416	response to light stimulus	32/1229	318/18870	0.00964096	0.0833299	0.0677694	ITGB1/GPX1/TIMP1/SLC1A3/APP/XPC/PTPRK/DDB2/GNAQ/GRIN2A/PIAS1/TUBA1A/BEST1/CACNB4/CDKN1A/PDE1B/HIF1A/PER3/MC1R/DCT/KIT/CRY2/TYR/CCND1/SLC1A2/MMP2/PBK/HMGCR/HRH1/CERS1/MEIS2/TRPM1	32	Basal-cell
GO:1901379	regulation of potassium ion transmembrane transport	12/1229	86/18870	0.00965638	0.0833299	0.0677694	FLNA/ATP1B3/ITGB1/PRNP/KCNJ2/FHL1/KCNS1/TREM2/BIN1/GNB2/KCNE4/KCNN2	12	Basal-cell
GO:2000628	regulation of miRNA metabolic process	12/1229	86/18870	0.00965638	0.0833299	0.0677694	NFIB/SMAD3/NCOR2/TGFB1/BMP2/NGFR/HIF1A/BMP4/MYB/BMPR1A/SOX9/SREBF2	12	Basal-cell
GO:0070482	response to oxygen levels	34/1229	343/18870	0.00971539	0.0835814	0.0679739	PDLIM1/POSTN/FGFR2/ITGA2/PDPN/SLC2A1/ASCL2/AJUBA/SMAD3/TGFB1/SLC7A5/EDN1/EPAS1/PSEN2/BMP2/PMAIP1/THBS1/EDNRA/ANGPTL4/CDKN1A/CPEB2/HIF1A/ZEB2/TREM2/SOD3/CPEB4/PLEKHN1/MMP2/MYB/ARNT2/ACAA2/WTIP/FZD4/MIEF1	34	Basal-cell
GO:0051302	regulation of cell division	21/1229	186/18870	0.00980718	0.0835814	0.0679739	DLL1/TP63/FGFR2/PDGFA/PDGFC/TGFB1/TXNIP/KIF18B/KIF20A/CIT/KIF23/CDCA8/KIF13A/KAT2B/EFHC1/BLM/CALM3/KIF20B/WNT9B/KIF14/PRC1	21	Basal-cell
GO:0072012	glomerulus vasculature development	6/1229	29/18870	0.00980826	0.0835814	0.0679739	NOTCH3/HES1/SERPINB7/EDNRA/BMP4/NOTCH2	6	Basal-cell
GO:1902430	negative regulation of amyloid-beta formation	6/1229	29/18870	0.00980826	0.0835814	0.0679739	PRNP/APOE/NTRK2/SORL1/BIN1/RTN1	6	Basal-cell
GO:0010566	regulation of ketone biosynthetic process	5/1229	21/18870	0.00983757	0.0835814	0.0679739	DKK3/WNT4/BMP2/CLCN2/PPTC7	5	Basal-cell
GO:0035024	negative regulation of Rho protein signal transduction	5/1229	21/18870	0.00983757	0.0835814	0.0679739	ITGA3/ITGB1/MET/DLC1/KCTD10	5	Basal-cell
GO:0044321	response to leptin	5/1229	21/18870	0.00983757	0.0835814	0.0679739	ADIPOR1/EDN1/NR1D1/CCND1/LRP2	5	Basal-cell
GO:0060444	branching involved in mammary gland duct morphogenesis	5/1229	21/18870	0.00983757	0.0835814	0.0679739	WNT4/DDR1/VDR/LRP5/AREG	5	Basal-cell
GO:0060445	branching involved in salivary gland morphogenesis	5/1229	21/18870	0.00983757	0.0835814	0.0679739	FGFR2/PDGFA/LAMA5/SNAI2/PLXND1	5	Basal-cell
GO:2001044	regulation of integrin-mediated signaling pathway	5/1229	21/18870	0.00983757	0.0835814	0.0679739	FLNA/TIMP1/EMP2/LAMC1/LIMS2	5	Basal-cell
GO:0046470	phosphatidylcholine metabolic process	11/1229	76/18870	0.00990736	0.0837858	0.0681402	DBI/LCAT/SLC27A1/LPCAT3/PLA2G7/ENPP2/LPCAT1/FABP5/PNPLA7/SLC44A3/ABHD3	11	Basal-cell
GO:0086001	cardiac muscle cell action potential	11/1229	76/18870	0.00990736	0.0837858	0.0681402	FLNA/DSP/KCNJ2/SCN4B/DSG2/BIN1/DMD/PKP2/KCNE4/CALM3/KCNN2	11	Basal-cell
GO:0086003	cardiac muscle cell contraction	11/1229	76/18870	0.00990736	0.0837858	0.0681402	FLNA/DSP/KCNJ2/SCN4B/DSG2/BIN1/PKP2/SGCD/KCNE4/GSN/KCNN2	11	Basal-cell
GO:0045860	positive regulation of protein kinase activity	29/1229	282/18870	0.0100264	0.0846625	0.0688532	CCND2/PDGFA/PDGFC/PRNP/MST1R/NRG1/TGFB1/EDN1/GAS6/TNFRSF10B/EMP2/IL34/THBS1/TRAF4/ARHGEF5/CDKN1A/PTPRC/CARD10/ERBB3/KIT/GHR/PSRC1/CCND1/CALM3/PTPN1/PIK3R6/NTF3/KIF14/PIK3CG	29	Basal-cell
GO:1903038	negative regulation of leukocyte cell-cell adhesion	18/1229	152/18870	0.010089	0.0849402	0.069079	ASS1/PRNP/ASCL2/DLG5/LGALS9B/IRF1/CBLB/IL20RB/RUNX3/LGALS9C/NRARP/BMP4/TNFRSF21/LGALS3/TNFAIP8L2/PAG1/SPN/HAVCR2	18	Basal-cell
GO:0014020	primary neural tube formation	13/1229	97/18870	0.0100902	0.0849402	0.069079	TGFB1/PTK7/CELSR1/ST14/GRHL3/RGMA/IFT172/HIF1A/BMP4/FZD6/DLC1/LRP2/KIF20B	13	Basal-cell
GO:0014075	response to amine	8/1229	47/18870	0.0102528	0.0856527	0.0696585	ASS1/ITGA2/PPP3CA/EDN1/GRIN2A/EDNRA/PDE1B/CDK1	8	Basal-cell
GO:0021575	hindbrain morphogenesis	8/1229	47/18870	0.0102528	0.0856527	0.0696585	DLL1/WNT7A/HES1/SPTBN2/TUBA1A/DLC1/GLI2/KIF14	8	Basal-cell
GO:0031577	spindle checkpoint signaling	8/1229	47/18870	0.0102528	0.0856527	0.0696585	TTK/CDC20/SPC25/NUF2/NDC80/CDCA8/SPC24/BUB1B	8	Basal-cell
GO:0045933	positive regulation of muscle contraction	8/1229	47/18870	0.0102528	0.0856527	0.0696585	ITGA2/NMU/EDN1/EDN2/KIT/PTAFR/NPNT/UCN	8	Basal-cell
GO:1905314	semi-lunar valve development	8/1229	47/18870	0.0102528	0.0856527	0.0696585	SNAI2/TGFB1/BMP2/BMP4/NOTCH2/HEY1/ADAMTS5/SOX9	8	Basal-cell
GO:0001101	response to acid chemical	17/1229	141/18870	0.0102795	0.0857458	0.0697342	ASS1/PDGFC/COL18A1/COL16A1/COL4A6/NTRK2/SLC7A5/EDN1/COL5A2/TUBA1A/LAMTOR4/CPEB4/SLC1A2/MMP2/COL4A1/COL1A2/FYN	17	Basal-cell
GO:0010632	regulation of epithelial cell migration	30/1229	295/18870	0.0103728	0.0862597	0.0701521	ITGA3/SMOC2/ITGA2/DCN/MIR205/APOE/WNT7A/GLUL/TGFB1/MET/ADIPOR1/SERPINF1/EDN1/ANXA3/EMP2/RRAS/THBS1/SPRED1/PTPRM/RAB25/CARD10/HIF1A/ENPP2/MEF2C/GLIPR2/EVL/SOX9/PIK3CG/MMRN2/MARVELD3	30	Basal-cell
GO:0032612	interleukin-1 production	16/1229	130/18870	0.010399	0.0862597	0.0701521	SMAD3/APP/GSDMD/GAS6/IL1R2/TRIM16/CX3CL1/TREM2/SAA1/LPL/IL16/CD36/PANX1/TYROBP/S1PR3/HAVCR2	16	Basal-cell
GO:0032652	regulation of interleukin-1 production	16/1229	130/18870	0.010399	0.0862597	0.0701521	SMAD3/APP/GSDMD/GAS6/IL1R2/TRIM16/CX3CL1/TREM2/SAA1/LPL/IL16/CD36/PANX1/TYROBP/S1PR3/HAVCR2	16	Basal-cell
GO:0086091	regulation of heart rate by cardiac conduction	7/1229	38/18870	0.0104039	0.0862597	0.0701521	DSP/KCNJ2/SCN4B/DSG2/BIN1/PKP2/KCNE4	7	Basal-cell
GO:0034309	primary alcohol biosynthetic process	4/1229	14/18870	0.0105774	0.0866525	0.0704716	DKK3/WNT4/BMP2/CLCN2	4	Basal-cell
GO:0045605	negative regulation of epidermal cell differentiation	4/1229	14/18870	0.0105774	0.0866525	0.0704716	DLL1/TP63/HES1/HOXA7	4	Basal-cell
GO:0045683	negative regulation of epidermis development	4/1229	14/18870	0.0105774	0.0866525	0.0704716	DLL1/TP63/HES1/HOXA7	4	Basal-cell
GO:0055012	ventricular cardiac muscle cell differentiation	4/1229	14/18870	0.0105774	0.0866525	0.0704716	MEF2A/FHL2/MEF2C/CDK1	4	Basal-cell
GO:0070141	response to UV-A	4/1229	14/18870	0.0105774	0.0866525	0.0704716	TIMP1/CCND1/MMP2/CERS1	4	Basal-cell
GO:0070307	lens fiber cell development	4/1229	14/18870	0.0105774	0.0866525	0.0704716	WNT7A/VIM/WNT5B/TMOD1	4	Basal-cell
GO:0098883	synapse pruning	4/1229	14/18870	0.0105774	0.0866525	0.0704716	ITGB1/PLXNC1/CX3CL1/TREM2	4	Basal-cell
GO:1902287	semaphorin-plexin signaling pathway involved in axon guidance	4/1229	14/18870	0.0105774	0.0866525	0.0704716	EDN1/PLXNC1/EDNRA/PLXND1	4	Basal-cell
GO:0045861	negative regulation of proteolysis	25/1229	235/18870	0.0107581	0.0880016	0.0715688	SERPINH1/PRNP/GPX1/TIMP1/CST3/SERPINF1/SERPINB7/GAS6/SERPINB6/SERPING1/TIMP2/THBS1/IL1R2/TMEM98/SVIP/DHCR24/SORL1/CSTB/BIN1/CSN2/PBK/IFI6/CSTA/SERPINB12/SERPINA12	25	Basal-cell
GO:0051293	establishment of spindle localization	9/1229	57/18870	0.010873	0.0888098	0.0722261	ITGB1/GPSM2/SPRY1/NDC80/SPAG5/KIF25/CENPA/NUSAP1/PKHD1	9	Basal-cell
GO:0072078	nephron tubule morphogenesis	11/1229	77/18870	0.0108982	0.0888837	0.0722862	LAMA5/HES1/WNT4/GPC3/GDNF/BMP2/BMP4/NPNT/SOX9/WNT9B/FMN1	11	Basal-cell
GO:0008593	regulation of Notch signaling pathway	13/1229	98/18870	0.010961	0.089263	0.0725946	JAG2/DLL1/TP63/POSTN/DLK2/LFNG/HES1/NRARP/TSPEAR/KIT/HEY1/SREBF2/TSPAN15	13	Basal-cell
GO:0016126	sterol biosynthetic process	10/1229	67/18870	0.0110388	0.0897636	0.0730017	APOE/CYB5R1/LPCAT3/FDFT1/DHCR24/CES1/HMGCR/SREBF2/ACAA2/TM7SF2	10	Basal-cell
GO:0035051	cardiocyte differentiation	19/1229	165/18870	0.0111412	0.0904622	0.0735699	DLL1/ITGB1/MEF2A/NRG1/FHL2/WNT3A/HES1/TGFB1/SPRY1/EDN1/BMP2/EDNRA/NEBL/TENM4/BMP4/MEF2C/SGCD/BMPR1A/CDK1	19	Basal-cell
GO:0007416	synapse assembly	22/1229	200/18870	0.0111626	0.0905031	0.0736031	THBS2/CLSTN1/WNT3A/DLG5/NPTN/WNT7A/APP/NTRK2/IL1RAP/SPTBN2/TPBG/SDCBP/MAP1B/NLGN4Y/PLXND1/SLITRK6/MEF2C/NLGN4X/SDK2/SLITRK2/SRGAP2/PCDHB5	22	Basal-cell
GO:0071214	cellular response to abiotic stimulus	33/1229	334/18870	0.0112289	0.0907725	0.0738222	CCND2/ITGA2/SLC2A1/SNAI2/TIMP1/KCNJ2/IRF1/XPC/BDKRB2/SERPINB6/PTPRK/CNN2/DDB2/TNFRSF10B/LRRC8D/SCNN1A/CDKN1A/NET1/MC1R/RAB11FIP5/CRY2/PTAFR/IL33/MMP2/PBK/CAPN3/SCX/BLM/SOX9/CERS1/CHP1/TRPM1/BRCA1	33	Basal-cell
GO:0104004	cellular response to environmental stimulus	33/1229	334/18870	0.0112289	0.0907725	0.0738222	CCND2/ITGA2/SLC2A1/SNAI2/TIMP1/KCNJ2/IRF1/XPC/BDKRB2/SERPINB6/PTPRK/CNN2/DDB2/TNFRSF10B/LRRC8D/SCNN1A/CDKN1A/NET1/MC1R/RAB11FIP5/CRY2/PTAFR/IL33/MMP2/PBK/CAPN3/SCX/BLM/SOX9/CERS1/CHP1/TRPM1/BRCA1	33	Basal-cell
GO:0007596	blood coagulation	24/1229	224/18870	0.01131	0.091294	0.0742463	FLNA/KRT1/PDGFA/ITGA2/PDPN/WNT3A/APOE/MYL9/EDN1/GAS6/PROS1/SERPING1/VAV2/GNAQ/THBS1/PROCR/FZD6/RAB27A/SAA1/FERMT3/DMTN/VKORC1/CD36/PIK3CG	24	Basal-cell
GO:0051654	establishment of mitochondrion localization	6/1229	30/18870	0.0116	0.0927044	0.0753934	MARK1/MAP1B/HIF1A/SYBU/RHOT1/MAPT	6	Basal-cell
GO:0097205	renal filtration	6/1229	30/18870	0.0116	0.0927044	0.0753934	ITGA3/PPP3CA/GAS6/EMP2/EDNRA/TBC1D8B	6	Basal-cell
GO:0031670	cellular response to nutrient	8/1229	48/18870	0.0116197	0.0927044	0.0753934	POSTN/SNAI2/TNC/VDR/GAS6/PLD1/LPL/KAT2B	8	Basal-cell
GO:0033046	negative regulation of sister chromatid segregation	8/1229	48/18870	0.0116197	0.0927044	0.0753934	TTK/CDC20/SPC25/NUF2/NDC80/CDCA8/SPC24/BUB1B	8	Basal-cell
GO:0033048	negative regulation of mitotic sister chromatid segregation	8/1229	48/18870	0.0116197	0.0927044	0.0753934	TTK/CDC20/SPC25/NUF2/NDC80/CDCA8/SPC24/BUB1B	8	Basal-cell
GO:0045841	negative regulation of mitotic metaphase/anaphase transition	8/1229	48/18870	0.0116197	0.0927044	0.0753934	TTK/CDC20/SPC25/NUF2/NDC80/CDCA8/SPC24/BUB1B	8	Basal-cell
GO:1990089	response to nerve growth factor	8/1229	48/18870	0.0116197	0.0927044	0.0753934	HES1/NTRK2/NTF4/RAPGEF1/SORT1/TMEM108/NTF3/MAPT	8	Basal-cell
GO:2000816	negative regulation of mitotic sister chromatid separation	8/1229	48/18870	0.0116197	0.0927044	0.0753934	TTK/CDC20/SPC25/NUF2/NDC80/CDCA8/SPC24/BUB1B	8	Basal-cell
GO:0034504	protein localization to nucleus	31/1229	310/18870	0.0116568	0.0928661	0.0755249	FLNA/SMAD3/GLUL/TGFB1/TXNIP/CHP2/PPP3CA/CBLB/LIMK2/FERMT1/NGFR/TMEM147/TMEM98/CACNB4/CDKN1A/CARD10/BMP4/CRY2/SNUPN/RGPD3/APOD/HCLS1/IL33/EFCAB7/CD36/CDK1/SOX9/CHP1/HHEX/RANGAP1/FYN	31	Basal-cell
GO:0061351	neural precursor cell proliferation	19/1229	166/18870	0.0118383	0.0941756	0.0765899	FLNA/FGFR2/ITGB1/NFIB/WNT3A/WNT7A/SMARCD3/CDON/CX3CL1/HIF1A/FZD6/BCAN/DCT/SOX10/WDR62/LRP2/LIMS2/KIF14/HAPLN3	19	Basal-cell
GO:0038179	neurotrophin signaling pathway	7/1229	39/18870	0.0119849	0.0952036	0.0774259	NTRK2/NTF4/RAPGEF1/SPRY1/SORT1/TMEM108/NTF3	7	Basal-cell
GO:0035584	calcium-mediated signaling using intracellular calcium source	5/1229	22/18870	0.0120617	0.0954006	0.0775861	PRNP/DEFB1/PTPRC/GPR143/DMTN	5	Basal-cell
GO:0048169	regulation of long-term neuronal synaptic plasticity	5/1229	22/18870	0.0120617	0.0954006	0.0775861	NPTN/APP/KIT/GRIK2/CAMK2B	5	Basal-cell
GO:0097062	dendritic spine maintenance	5/1229	22/18870	0.0120617	0.0954006	0.0775861	ITGA3/PRNP/APOE/TREM2/FYN	5	Basal-cell
GO:1903829	positive regulation of protein localization	44/1229	476/18870	0.0121408	0.0956653	0.0778014	ITGA3/FLNA/ITGB1/PRNP/WLS/WNT3A/ACSL4/SMAD3/WNT7A/GPSM2/TGFB1/BAP1/CHP2/GAS6/LIMK2/ANO1/NGFR/PIAS1/RUFY3/EXPH5/ARHGEF5/CACNB4/SORL1/CARD10/HIF1A/BMP4/TREM2/SNX33/NNAT/HCLS1/LGALS3/EFCAB7/SYBU/KIF20B/CDK1/SREBF2/OR51E2/PRKCB/XPO4/TYROBP/CHP1/MAPT/MIEF1/FYN	44	Basal-cell
GO:0001706	endoderm formation	9/1229	58/18870	0.0121474	0.0956653	0.0778014	LAMB3/LAMA3/COL7A1/COL5A1/COL5A2/COL12A1/SOX7/MMP2/FN1	9	Basal-cell
GO:0015804	neutral amino acid transport	9/1229	58/18870	0.0121474	0.0956653	0.0778014	SLC38A5/SLC1A3/SLC7A5/SLC43A1/SLC1A5/SLC25A38/SLC1A4/SLC38A4/SLC1A2	9	Basal-cell
GO:0032386	regulation of intracellular transport	33/1229	336/18870	0.0121953	0.0957374	0.07786	FLNA/PRNP/EHD2/PTPN14/SMAD3/TGFB1/BAP1/CHP2/GAS6/FERMT1/PLA2G4E/SVIP/RUFY3/MAP1B/SORL1/BMP4/MX2/BAG4/APOD/HCLS1/DMTN/EFCAB7/PTPN1/SPAG5/KIF20B/CD36/CDK1/SREBF2/XPO4/CHP1/MIEF1/RANGAP1/FYN	33	Basal-cell
GO:0030193	regulation of blood coagulation	10/1229	68/18870	0.0122088	0.0957374	0.07786	KRT1/PDGFA/APOE/EDN1/PROS1/SERPING1/THBS1/DMTN/VKORC1/CD36	10	Basal-cell
GO:0051055	negative regulation of lipid biosynthetic process	10/1229	68/18870	0.0122088	0.0957374	0.07786	DKK3/PDGFA/SNAI2/APOE/WNT4/SLC27A1/BMP2/LPCAT1/SERPINA12/BRCA1	10	Basal-cell
GO:0098813	nuclear chromosome segregation	31/1229	312/18870	0.0126963	0.0994183	0.0808535	FLNA/SMARCD3/TTL/BCL7A/ARHGEF10/GEM/KIF18B/TOP2A/TACC3/PSRC1/NCAPH/TTK/KIF23/CDC20/SPC25/KIFC2/NUF2/NDC80/CDCA8/SPC24/KAT2B/UBE2C/KIFC1/BUB1B/SPAG5/KIF25/CDK1/KIF14/NUSAP1/MYBL2/PRC1	31	Basal-cell
GO:0002244	hematopoietic progenitor cell differentiation	16/1229	133/18870	0.0127879	0.0999931	0.0813211	HES1/TGFB1/DACT2/KITLG/PTPRC/TOP2A/BMP4/SIPA1L3/KIT/ESCO2/ANLN/HOXB4/MYB/SERPINB12/FST/BATF	16	Basal-cell
GO:0060840	artery development	14/1229	111/18870	0.0129938	0.101458	0.0825127	NOTCH3/MIR205/APOE/HES1/AP2B1/EDN1/NGFR/EDNRA/HPGD/PLXND1/BMP4/HEY1/LRP2/BMPR1A	14	Basal-cell
GO:0072088	nephron epithelium morphogenesis	11/1229	79/18870	0.0131056	0.101732	0.0827354	LAMA5/HES1/WNT4/GPC3/GDNF/BMP2/BMP4/NPNT/SOX9/WNT9B/FMN1	11	Basal-cell
GO:0035987	endodermal cell differentiation	8/1229	49/18870	0.0131161	0.101732	0.0827354	LAMB3/LAMA3/COL7A1/COL5A1/COL5A2/COL12A1/MMP2/FN1	8	Basal-cell
GO:0060071	Wnt signaling pathway, planar cell polarity pathway	8/1229	49/18870	0.0131161	0.101732	0.0827354	WNT7A/PTK7/CELSR1/GRHL3/GPC3/DAAM1/FZD6/WNT9B	8	Basal-cell
GO:0048588	developmental cell growth	25/1229	239/18870	0.0131194	0.101732	0.0827354	WNT3/POSTN/ITGB1/WNT3A/APOE/APP/DDR1/AUTS2/EDN1/TTL/RGMA/EDNRA/EDN2/CRABP2/RUFY3/MAP1B/S100B/TRPV2/SYT17/L1CAM/ARHGAP4/SOX9/TMEM108/MAPT/FN1	25	Basal-cell
GO:0030111	regulation of Wnt signaling pathway	33/1229	338/18870	0.0132285	0.101732	0.0827354	ITGA3/WNT3/DKK3/FGFR2/TAX1BP3/WLS/SNAI2/WNT3A/APOE/SMAD3/TSKU/APP/TGFB1/PTK7/GPC3/TPBG/FERMT1/GNAQ/BMP2/SOX7/WNT5B/NRARP/LGR6/ZEB2/FZD6/SOX10/IGFBP6/SCEL/SOSTDC1/TCF7L1/DEPDC1B/SOX9/HHEX	33	Basal-cell
GO:0050921	positive regulation of chemotaxis	17/1229	145/18870	0.0133646	0.101732	0.0827354	CDH13/SMOC2/ITGA2/SMAD3/TGFB1/MET/EDN1/GAS6/TPBG/IL34/THBS1/EDN2/PLA2G7/TREM2/IL16/GPSM3/NTF3	17	Basal-cell
GO:0010975	regulation of neuron projection development	42/1229	453/18870	0.0133808	0.101732	0.0827354	ITGA3/WNT3/FLNA/ITGA6/WNT3A/APOE/NPTN/WNT7A/TSKU/HES1/NTRK2/DDR1/RAPGEF1/SERPINF1/PPP3CA/PTK7/NGEF/RGMA/PLXNC1/PMP22/MARK1/RTN4RL2/VIM/CRABP2/RUFY3/MAP1B/ROR2/PLXND1/CX3CL1/PREX1/CNTN1/TRPV2/L1CAM/ARHGAP4/KAT2B/TUBB2B/CAMK2B/MAPT/SDC2/FZD4/FN1/FYN	42	Basal-cell
GO:1902903	regulation of supramolecular fiber organization	37/1229	389/18870	0.0134362	0.101732	0.0827354	FLNA/LIMA1/GPX1/APOE/SMAD3/APP/WNT4/MET/SYNPO2/EDN1/ARAP1/PHLDB2/SPTBN2/ARHGEF10/CDC42EP4/MAP1B/ARHGEF5/CX3CL1/PREX1/TREM2/DLC1/TJP1/BIN1/EVL/HAUS6/BAG4/TMOD1/PSRC1/TUBB4A/ARHGEF10L/HCLS1/DMTN/AEBP1/SCIN/GSN/FMN1/MAPT	37	Basal-cell
GO:0035019	somatic stem cell population maintenance	10/1229	69/18870	0.0134699	0.101732	0.0827354	TP63/ZFP36L2/ASCL2/WNT7A/HES1/LRP5/KIT/BMPR1A/SOX9/WNT9B	10	Basal-cell
GO:0050918	positive chemotaxis	10/1229	69/18870	0.0134699	0.101732	0.0827354	CDH13/ITGA2/SMAD3/MET/GDNF/CX3CL1/BMP4/IL16/LGALS3/NTF3	10	Basal-cell
GO:0010965	regulation of mitotic sister chromatid separation	9/1229	59/18870	0.0135299	0.101732	0.0827354	TTK/CDC20/SPC25/NUF2/NDC80/CDCA8/SPC24/UBE2C/BUB1B	9	Basal-cell
GO:0034311	diol metabolic process	6/1229	31/18870	0.0136105	0.101732	0.0827354	PCBD1/SGPP2/ACER3/DEGS2/ASAH1/LRP2	6	Basal-cell
GO:0060674	placenta blood vessel development	6/1229	31/18870	0.0136105	0.101732	0.0827354	HES1/ITGB8/PLCD3/NOTCH2/HEY1/HS6ST1	6	Basal-cell
GO:0061437	renal system vasculature development	6/1229	31/18870	0.0136105	0.101732	0.0827354	NOTCH3/HES1/SERPINB7/EDNRA/BMP4/NOTCH2	6	Basal-cell
GO:0061440	kidney vasculature development	6/1229	31/18870	0.0136105	0.101732	0.0827354	NOTCH3/HES1/SERPINB7/EDNRA/BMP4/NOTCH2	6	Basal-cell
GO:0015807	L-amino acid transport	12/1229	90/18870	0.0136525	0.101732	0.0827354	SLC38A5/ITGB1/SLC1A3/SLC7A1/SLC7A5/SLC43A1/SLC1A5/SLC47A1/SLC25A38/SLC1A4/SLC38A4/SLC1A2	12	Basal-cell
GO:0003413	chondrocyte differentiation involved in endochondral bone morphogenesis	4/1229	15/18870	0.0136922	0.101732	0.0827354	SERPINH1/TSKU/ANXA6/SOX9	4	Basal-cell
GO:0007567	parturition	4/1229	15/18870	0.0136922	0.101732	0.0827354	EDN1/HPGD/PTAFR/MMP2	4	Basal-cell
GO:0010838	positive regulation of keratinocyte proliferation	4/1229	15/18870	0.0136922	0.101732	0.0827354	TP63/AREG/LRG1/NOTCH2	4	Basal-cell
GO:0034310	primary alcohol catabolic process	4/1229	15/18870	0.0136922	0.101732	0.0827354	ALDH3B2/ALDH3B1/SULT1E1/AKR1B10	4	Basal-cell
GO:0042308	negative regulation of protein import into nucleus	4/1229	15/18870	0.0136922	0.101732	0.0827354	FERMT1/APOD/CD36/CHP1	4	Basal-cell
GO:0046348	amino sugar catabolic process	4/1229	15/18870	0.0136922	0.101732	0.0827354	NAGK/CTBS/RENBP/CHI3L2	4	Basal-cell
GO:0060099	regulation of phagocytosis, engulfment	4/1229	15/18870	0.0136922	0.101732	0.0827354	ITGA2/RAB31/TREM2/CD36	4	Basal-cell
GO:0060148	positive regulation of post-transcriptional gene silencing	4/1229	15/18870	0.0136922	0.101732	0.0827354	AJUBA/TGFB1/BMP4/WTIP	4	Basal-cell
GO:0060572	morphogenesis of an epithelial bud	4/1229	15/18870	0.0136922	0.101732	0.0827354	TP63/FGFR2/BMP4/SOSTDC1	4	Basal-cell
GO:0061307	cardiac neural crest cell differentiation involved in heart development	4/1229	15/18870	0.0136922	0.101732	0.0827354	HES1/EDN1/EDNRA/BMP4	4	Basal-cell
GO:0061308	cardiac neural crest cell development involved in heart development	4/1229	15/18870	0.0136922	0.101732	0.0827354	HES1/EDN1/EDNRA/BMP4	4	Basal-cell
GO:0070207	protein homotrimerization	4/1229	15/18870	0.0136922	0.101732	0.0827354	SLC1A5/SIGMAR1/SLC1A2/ALOX5AP	4	Basal-cell
GO:0072537	fibroblast activation	4/1229	15/18870	0.0136922	0.101732	0.0827354	ULK3/ZEB2/AKAP12/MYB	4	Basal-cell
GO:0090030	regulation of steroid hormone biosynthetic process	4/1229	15/18870	0.0136922	0.101732	0.0827354	DKK3/WNT4/BMP2/CLCN2	4	Basal-cell
GO:0090280	positive regulation of calcium ion import	4/1229	15/18870	0.0136922	0.101732	0.0827354	CCL2/TRPV2/LGALS3/UCN	4	Basal-cell
GO:1900370	positive regulation of post-transcriptional gene silencing by RNA	4/1229	15/18870	0.0136922	0.101732	0.0827354	AJUBA/TGFB1/BMP4/WTIP	4	Basal-cell
GO:1904251	regulation of bile acid metabolic process	4/1229	15/18870	0.0136922	0.101732	0.0827354	NR1D1/KIT/STAR/CES1	4	Basal-cell
GO:1905153	regulation of membrane invagination	4/1229	15/18870	0.0136922	0.101732	0.0827354	ITGA2/RAB31/TREM2/CD36	4	Basal-cell
GO:2000637	positive regulation of miRNA-mediated gene silencing	4/1229	15/18870	0.0136922	0.101732	0.0827354	AJUBA/TGFB1/BMP4/WTIP	4	Basal-cell
GO:0001953	negative regulation of cell-matrix adhesion	7/1229	40/18870	0.0137321	0.101732	0.0827354	POSTN/HOXA7/PHLDB2/THBS1/DLC1/APOD/DMTN	7	Basal-cell
GO:0040001	establishment of mitotic spindle localization	7/1229	40/18870	0.0137321	0.101732	0.0827354	ITGB1/GPSM2/SPRY1/NDC80/CENPA/NUSAP1/PKHD1	7	Basal-cell
GO:0042307	positive regulation of protein import into nucleus	7/1229	40/18870	0.0137321	0.101732	0.0827354	FLNA/SMAD3/TGFB1/CHP2/HCLS1/EFCAB7/CDK1	7	Basal-cell
GO:0030902	hindbrain development	18/1229	157/18870	0.0138096	0.102168	0.0830902	FLNA/DLL1/ITGB1/WLS/NFIB/WNT7A/HES1/NCOR2/SPTBN2/NHLH2/HOXB2/TUBA1A/DLC1/CNTN1/GLI2/NLGN4X/KIF14/FZD4	18	Basal-cell
GO:0003333	amino acid transmembrane transport	13/1229	101/18870	0.0139261	0.102892	0.0836786	SLC38A5/ITGB1/SLC1A3/SLC7A1/SLC7A5/SLC43A1/SLC1A5/LRRC8D/SLC47A1/SLC25A38/SLC1A4/SLC38A4/SLC1A2	13	Basal-cell
GO:0090596	sensory organ morphogenesis	28/1229	277/18870	0.0139512	0.102939	0.0837172	EFEMP1/DLL1/FGFR2/FJX1/WNT3A/TSKU/NTRK2/COL5A1/PTK7/FAT1/EDN1/COL5A2/GRHL3/CDON/IFT172/EDNRA/PTPRM/LRP5/WNT16/HIF1A/SLITRK6/BMP4/FZD6/TMIE/NOTCH2/SDK2/SOX9/STRC	28	Basal-cell
GO:0001508	action potential	17/1229	146/18870	0.014239	0.104362	0.0848742	FLNA/DSP/NTRK2/KCNJ2/MYH14/GNAQ/SCN4B/DSG2/CACNB4/BIN1/DMD/PKP2/KCNE4/GRIK2/CALM3/CD36/KCNN2	17	Basal-cell
GO:0035296	regulation of tube diameter	17/1229	146/18870	0.014239	0.104362	0.0848742	GPX1/APOE/EDN1/BDKRB2/ATP2B1/EDNRA/EDN2/PLOD3/EXT2/ADORA2B/EDNRB/SOD3/MMP2/KAT2B/HRH1/VSTM4/UCN	17	Basal-cell
GO:0045598	regulation of fat cell differentiation	17/1229	146/18870	0.014239	0.104362	0.0848742	ZFP36L2/DLK2/SNAI2/WNT3A/SMAD3/HES1/TGFB1/SULT1E1/BMP2/NR1D1/ADIRF/LRP5/METRNL/SORT1/LRP3/LPL/ZFPM2	17	Basal-cell
GO:0051783	regulation of nuclear division	17/1229	146/18870	0.014239	0.104362	0.0848742	CAV2/WNT4/EDN1/LRP5/TOM1L2/BMP4/TTK/CDC20/SPC25/NUF2/NDC80/CDCA8/SPC24/UBE2C/BUB1B/KIF20B/NUSAP1	17	Basal-cell
GO:0097746	blood vessel diameter maintenance	17/1229	146/18870	0.014239	0.104362	0.0848742	GPX1/APOE/EDN1/BDKRB2/ATP2B1/EDNRA/EDN2/PLOD3/EXT2/ADORA2B/EDNRB/SOD3/MMP2/KAT2B/HRH1/VSTM4/UCN	17	Basal-cell
GO:0048844	artery morphogenesis	11/1229	80/18870	0.0143288	0.104881	0.0852961	NOTCH3/MIR205/APOE/HES1/EDN1/EDNRA/HPGD/BMP4/HEY1/LRP2/BMPR1A	11	Basal-cell
GO:0036293	response to decreased oxygen levels	31/1229	315/18870	0.0143953	0.105088	0.0854643	PDLIM1/POSTN/FGFR2/ITGA2/SLC2A1/ASCL2/AJUBA/SMAD3/TGFB1/EDN1/EPAS1/PSEN2/BMP2/PMAIP1/THBS1/EDNRA/ANGPTL4/CPEB2/HIF1A/ZEB2/TREM2/SOD3/CPEB4/PLEKHN1/MMP2/MYB/ARNT2/ACAA2/WTIP/FZD4/MIEF1	31	Basal-cell
GO:1904062	regulation of monoatomic cation transmembrane transport	31/1229	315/18870	0.0143953	0.105088	0.0854643	FLNA/ATP1B3/ITGB1/PRNP/KCNJ2/FHL1/CHP2/PPP3CA/EDN1/PSEN2/KCNS1/GRIN2A/SCN4B/EDNRA/JPH2/BDKRB1/CACNB4/CX3CL1/SLC31A2/TREM2/BIN1/DMD/GNB2/KCNE4/CAPN3/CALM3/PLP1/KCNN2/PIK3CG/CHP1/FYN	31	Basal-cell
GO:0002274	myeloid leukocyte activation	25/1229	241/18870	0.0144469	0.105276	0.0856177	APP/IFNGR1/ITGB8/ANXA3/NR1D1/THBS1/EDN2/CX3CL1/PTPRC/PREX1/TREM2/ADORA2B/KIT/NOTCH2/PTAFR/IL33/MT1G/BATF/TYROBP/PIK3CG/FCER1A/MAPT/FN1/DNASE1L3/HAVCR2	25	Basal-cell
GO:0050817	coagulation	24/1229	229/18870	0.0145415	0.105276	0.0856177	FLNA/KRT1/PDGFA/ITGA2/PDPN/WNT3A/APOE/MYL9/EDN1/GAS6/PROS1/SERPING1/VAV2/GNAQ/THBS1/PROCR/FZD6/RAB27A/SAA1/FERMT3/DMTN/VKORC1/CD36/PIK3CG	24	Basal-cell
GO:0097191	extrinsic apoptotic signaling pathway	24/1229	229/18870	0.0145415	0.105276	0.0856177	GPX1/SNAI2/ITGA6/SMAD3/TGFB1/GDNF/PMAIP1/TNFRSF10B/THBS1/BCL2A1/KITLG/TNFRSF12A/CX3CL1/PTPRC/BMP4/ERBB3/SORT1/IL33/SRPX/MAL/LGALS3/IFI6/DEPTOR/BRCA1	24	Basal-cell
GO:0016338	calcium-independent cell-cell adhesion via plasma membrane cell-adhesion molecules	5/1229	23/18870	0.0146036	0.105276	0.0856177	BMP2/CLDN8/CX3CL1/CLDN1/CLDN4	5	Basal-cell
GO:0046597	negative regulation of viral entry into host cell	5/1229	23/18870	0.0146036	0.105276	0.0856177	IFITM3/LY6E/IFITM1/IFITM2/GSN	5	Basal-cell
GO:0046823	negative regulation of nucleocytoplasmic transport	5/1229	23/18870	0.0146036	0.105276	0.0856177	FERMT1/APOD/CD36/CHP1/RANGAP1	5	Basal-cell
GO:0048634	regulation of muscle organ development	5/1229	23/18870	0.0146036	0.105276	0.0856177	SMAD3/TGFB1/JPH2/BMP4/ERBB3	5	Basal-cell
GO:0010976	positive regulation of neuron projection development	18/1229	158/18870	0.0146687	0.105276	0.0856177	ITGA3/FLNA/ITGA6/APOE/NPTN/NTRK2/DDR1/RAPGEF1/SERPINF1/PTK7/RGMA/ROR2/CX3CL1/CNTN1/KAT2B/TUBB2B/CAMK2B/FYN	18	Basal-cell
GO:0090316	positive regulation of intracellular protein transport	18/1229	158/18870	0.0146687	0.105276	0.0856177	FLNA/PRNP/SMAD3/TGFB1/BAP1/CHP2/GAS6/RUFY3/SORL1/HCLS1/EFCAB7/KIF20B/CDK1/SREBF2/XPO4/CHP1/MIEF1/FYN	18	Basal-cell
GO:0048638	regulation of developmental growth	32/1229	328/18870	0.01467	0.105276	0.0856177	WNT3/DLL1/FGFR2/TP73/WNT3A/GAMT/APOE/APP/EDN1/HOPX/TTL/RGMA/CRABP2/RUFY3/MAP1B/CDKN1A/DUSP6/MEF2C/GHR/TRPV2/SYT17/L1CAM/ARHGAP4/RAI1/CAPN3/BMPR1A/CDK1/ZFPM2/MIR25/MAPT/FN1/SOCS2	32	Basal-cell
GO:0006693	prostaglandin metabolic process	8/1229	50/18870	0.0147487	0.105276	0.0856177	PTGS1/CBR1/EDN1/CYP2S1/GSTM1/EDN2/HPGD/FABP5	8	Basal-cell
GO:0043114	regulation of vascular permeability	8/1229	50/18870	0.0147487	0.105276	0.0856177	APOE/TGFB1/BDKRB2/ZEB2/AKAP12/TJP1/HRH1/UCN	8	Basal-cell
GO:0051985	negative regulation of chromosome segregation	8/1229	50/18870	0.0147487	0.105276	0.0856177	TTK/CDC20/SPC25/NUF2/NDC80/CDCA8/SPC24/BUB1B	8	Basal-cell
GO:0060976	coronary vasculature development	8/1229	50/18870	0.0147487	0.105276	0.0856177	AP2B1/PTK7/GPC3/SPRED1/PLXND1/BMP4/SGCD/LRP2	8	Basal-cell
GO:1902100	negative regulation of metaphase/anaphase transition of cell cycle	8/1229	50/18870	0.0147487	0.105276	0.0856177	TTK/CDC20/SPC25/NUF2/NDC80/CDCA8/SPC24/BUB1B	8	Basal-cell
GO:1905819	negative regulation of chromosome separation	8/1229	50/18870	0.0147487	0.105276	0.0856177	TTK/CDC20/SPC25/NUF2/NDC80/CDCA8/SPC24/BUB1B	8	Basal-cell
GO:0001843	neural tube closure	12/1229	91/18870	0.0148244	0.105276	0.0856177	TGFB1/PTK7/CELSR1/ST14/GRHL3/RGMA/IFT172/BMP4/FZD6/DLC1/LRP2/KIF20B	12	Basal-cell
GO:0001736	establishment of planar polarity	10/1229	70/18870	0.0148261	0.105276	0.0856177	TP63/WNT7A/PTK7/CELSR1/GRHL3/GPC3/DAAM1/FZD6/WNT9B/PKHD1	10	Basal-cell
GO:0006081	cellular aldehyde metabolic process	10/1229	70/18870	0.0148261	0.105276	0.0856177	DKK3/ALDH3B2/ALDH3A1/ALDH3B1/WNT4/BMP2/TALDO1/EDNRB/CLCN2/IDH2	10	Basal-cell
GO:0007164	establishment of tissue polarity	10/1229	70/18870	0.0148261	0.105276	0.0856177	TP63/WNT7A/PTK7/CELSR1/GRHL3/GPC3/DAAM1/FZD6/WNT9B/PKHD1	10	Basal-cell
GO:1900046	regulation of hemostasis	10/1229	70/18870	0.0148261	0.105276	0.0856177	KRT1/PDGFA/APOE/EDN1/PROS1/SERPING1/THBS1/DMTN/VKORC1/CD36	10	Basal-cell
GO:0051656	establishment of organelle localization	43/1229	469/18870	0.0148425	0.105276	0.0856177	ITGB1/GPSM2/SPRY1/CDR2L/TTL/LIMK2/SDCBP/MARK1/GEM/TUBA1A/MAP1B/MLPH/HIF1A/RAB27A/ADORA2B/KIT/SYNE2/PSRC1/MYO5C/SPC25/CLMN/GPR143/NUF2/NDC80/CDCA8/EXOC6/SPC24/KIF13A/KAT2B/KIFC1/SYBU/SPAG5/KIF25/RHOT1/CENPA/KIF14/PIK3CG/NUSAP1/FCER1A/MAPT/PKHD1/CEP19/MYO5B	43	Basal-cell
GO:0030100	regulation of endocytosis	29/1229	291/18870	0.0149742	0.105755	0.0860071	CDH13/DLL1/ITGA2/MIR205/WNT3A/APOE/CCL2/CD151/IL2RB/PPP3CA/GAS6/CNN2/GPC3/SDCBP/RAB31/PTPRC/TREM2/RAB27A/SNX33/BIN1/STON2/LGALS3/PTPN1/CD36/SYT7/PROM2/NTF3/STON1/DNAJC6	29	Basal-cell
GO:0001658	branching involved in ureteric bud morphogenesis	9/1229	60/18870	0.0150254	0.105755	0.0860071	LAMA5/WNT4/GPC3/GDNF/BMP2/BMP4/NPNT/SOX9/WNT9B	9	Basal-cell
GO:0006695	cholesterol biosynthetic process	9/1229	60/18870	0.0150254	0.105755	0.0860071	APOE/LPCAT3/FDFT1/DHCR24/CES1/HMGCR/SREBF2/ACAA2/TM7SF2	9	Basal-cell
GO:0032387	negative regulation of intracellular transport	9/1229	60/18870	0.0150254	0.105755	0.0860071	FERMT1/SVIP/MAP1B/BAG4/APOD/DMTN/CD36/CHP1/RANGAP1	9	Basal-cell
GO:0042908	xenobiotic transport	9/1229	60/18870	0.0150254	0.105755	0.0860071	SLC2A1/SLC47A2/SLC7A5/SLC43A3/ABCC3/SLC47A1/ABCA8/CLDN1/ABCC2	9	Basal-cell
GO:1902653	secondary alcohol biosynthetic process	9/1229	60/18870	0.0150254	0.105755	0.0860071	APOE/LPCAT3/FDFT1/DHCR24/CES1/HMGCR/SREBF2/ACAA2/TM7SF2	9	Basal-cell
GO:0048705	skeletal system morphogenesis	24/1229	230/18870	0.0152683	0.107327	0.0872858	SERPINH1/FGFR2/LAMA5/PLEKHA1/SMAD3/WNT7A/TSKU/HOXA7/HOXA9/HOXB2/LRP5/ALX1/BMP4/MEF2C/EXT2/GHR/HOXB4/MMP2/INPPL1/SCX/ANXA6/SOX9/WNT9B/FMN1	24	Basal-cell
GO:0001933	negative regulation of protein phosphorylation	30/1229	304/18870	0.015321	0.10756	0.0874748	PRNP/APOE/SPRED2/TGFB1/SPRY1/CBLB/BDKRB2/GNAQ/BMP2/PKIB/SPRED1/LRP5/BDKRB1/ERRFI1/IGFBP3/SORL1/CDKN1A/PTPRC/DUSP6/DMD/PBK/DMTN/CALM3/PTPN1/NTF3/MICAL1/CHP1/HHEX/MIR711/DEPTOR	30	Basal-cell
GO:0003151	outflow tract morphogenesis	11/1229	81/18870	0.0156361	0.109064	0.0886979	FGFR2/HES1/EDN1/EDNRA/PLXND1/HIF1A/BMP4/MEF2C/LRP2/BMPR1A/ZFPM2	11	Basal-cell
GO:0008344	adult locomotory behavior	11/1229	81/18870	0.0156361	0.109064	0.0886979	CCND2/APP/NTF4/GDNF/CHL1/TUBA1A/CACNB4/CSTB/SLITRK6/TMOD1/SNCG	11	Basal-cell
GO:0051304	chromosome separation	11/1229	81/18870	0.0156361	0.109064	0.0886979	SMARCAD1/NCAPH/TTK/CDC20/SPC25/NUF2/NDC80/CDCA8/SPC24/UBE2C/BUB1B	11	Basal-cell
GO:0072028	nephron morphogenesis	11/1229	81/18870	0.0156361	0.109064	0.0886979	LAMA5/HES1/WNT4/GPC3/GDNF/BMP2/BMP4/NPNT/SOX9/WNT9B/FMN1	11	Basal-cell
GO:0072210	metanephric nephron development	7/1229	41/18870	0.0156542	0.109064	0.0886979	HES1/WNT4/GDNF/BMP4/SOX9/WNT9B/FMN1	7	Basal-cell
GO:1903115	regulation of actin filament-based movement	7/1229	41/18870	0.0156542	0.109064	0.0886979	PDPN/DSP/KCNJ2/DSG2/ZEB2/BIN1/PKP2	7	Basal-cell
GO:0016049	cell growth	45/1229	497/18870	0.015819	0.110023	0.0894784	WNT3/POSTN/CLSTN1/ITGB1/LTBP4/WNT3A/APOE/SMAD3/APP/TGFB1/DDR1/ADIPOR1/FHL1/BAP1/TNC/AUTS2/EDN1/TTL/RGMA/SDCBP/EDNRA/EDN2/CRABP2/RUFY3/BDKRB1/MAP1B/IGFBP3/CDKN1A/NET1/S100B/TRPV2/SYT17/PSRC1/L1CAM/ARHGAP4/IGFBP7/SOX9/TMEM108/KIF14/UCN/CDKN2C/MAPT/FN1/SOCS2/BRCA1	45	Basal-cell
GO:1902751	positive regulation of cell cycle G2/M phase transition	6/1229	32/18870	0.015852	0.110023	0.0894784	HSPA2/APP/SMARCD3/CCND1/CDK1/DYRK3	6	Basal-cell
GO:1902992	negative regulation of amyloid precursor protein catabolic process	6/1229	32/18870	0.015852	0.110023	0.0894784	PRNP/APOE/NTRK2/SORL1/BIN1/RTN1	6	Basal-cell
GO:0007599	hemostasis	24/1229	231/18870	0.0160237	0.111075	0.0903335	FLNA/KRT1/PDGFA/ITGA2/PDPN/WNT3A/APOE/MYL9/EDN1/GAS6/PROS1/SERPING1/VAV2/GNAQ/THBS1/PROCR/FZD6/RAB27A/SAA1/FERMT3/DMTN/VKORC1/CD36/PIK3CG	24	Basal-cell
GO:0060606	tube closure	12/1229	92/18870	0.016071	0.111123	0.0903723	TGFB1/PTK7/CELSR1/ST14/GRHL3/RGMA/IFT172/BMP4/FZD6/DLC1/LRP2/KIF20B	12	Basal-cell
GO:0140747	regulation of ncRNA transcription	12/1229	92/18870	0.016071	0.111123	0.0903723	NFIB/SMAD3/NCOR2/TGFB1/BMP2/NGFR/HIF1A/BMP4/MYB/BMPR1A/SOX9/SREBF2	12	Basal-cell
GO:0009952	anterior/posterior pattern specification	23/1229	219/18870	0.0161218	0.111333	0.0905436	WNT3/DLL1/WLS/WNT3A/LFNG/SMAD3/HES1/HES4/HOXA7/ETS2/GPC3/CDON/HOXA9/BMP2/NRARP/HOXB2/LRP5/HES2/BMP4/HOXB4/HEY1/BMPR1A/HHEX	23	Basal-cell
GO:0030239	myofibril assembly	10/1229	71/18870	0.0162815	0.112296	0.0913262	ITGB1/MEF2A/TNNT1/MYL9/MYOM2/EDN1/NEBL/TNNT3/TMOD1/CAPN3	10	Basal-cell
GO:0060537	muscle tissue development	40/1229	433/18870	0.016356	0.112668	0.0916292	DLL1/FGFR2/ITGB1/MEF2A/NRG1/GPX1/TP73/FHL2/WNT3A/CAV2/SMAD3/DSP/TGFB1/MYOM2/PPP3CA/EDN1/HOPX/MYH14/CDON/BMP2/EDNRA/NEBL/DSG2/TENM4/JPH2/BMP4/MEF2C/ERBB3/NOTCH2/DMD/PKP2/SGCD/HEY1/LRP2/SCX/BMPR1A/CDK1/SOX9/ZFPM2/MIR25	40	Basal-cell
GO:0006692	prostanoid metabolic process	8/1229	51/18870	0.0165239	0.113682	0.092454	PTGS1/CBR1/EDN1/CYP2S1/GSTM1/EDN2/HPGD/FABP5	8	Basal-cell
GO:0006940	regulation of smooth muscle contraction	9/1229	61/18870	0.0166391	0.114189	0.0928661	ITGA2/NMU/EDN1/ATP2B1/EDN2/ADORA2B/KIT/PTAFR/NPNT	9	Basal-cell
GO:0048010	vascular endothelial growth factor receptor signaling pathway	9/1229	61/18870	0.0166391	0.114189	0.0928661	DLL1/VAV2/HIF1A/PTPN1/PRKCB/HHEX/MMRN2/FZD4/FYN	9	Basal-cell
GO:0150076	neuroinflammatory response	11/1229	82/18870	0.0170309	0.116334	0.0946107	ITGB1/APP/IFNGR1/NR1D1/CX3CL1/PTPRC/ZEB2/TREM2/IL33/TYROBP/MAPT	11	Basal-cell
GO:0010715	regulation of extracellular matrix disassembly	4/1229	16/18870	0.0173327	0.116334	0.0946107	PDPN/CST3/TGFB1/DDR1	4	Basal-cell
GO:0043455	regulation of secondary metabolic process	4/1229	16/18870	0.0173327	0.116334	0.0946107	SLC24A5/ZEB2/PMEL/TYRP1	4	Basal-cell
GO:0043517	positive regulation of DNA damage response, signal transduction by p53 class mediator	4/1229	16/18870	0.0173327	0.116334	0.0946107	SPRED2/PMAIP1/SPRED1/PLA2R1	4	Basal-cell
GO:0045651	positive regulation of macrophage differentiation	4/1229	16/18870	0.0173327	0.116334	0.0946107	TGFB1/IL34/ROR2/HCLS1	4	Basal-cell
GO:0046184	aldehyde biosynthetic process	4/1229	16/18870	0.0173327	0.116334	0.0946107	DKK3/WNT4/BMP2/CLCN2	4	Basal-cell
GO:0048021	regulation of melanin biosynthetic process	4/1229	16/18870	0.0173327	0.116334	0.0946107	SLC24A5/ZEB2/PMEL/TYRP1	4	Basal-cell
GO:0048532	anatomical structure arrangement	4/1229	16/18870	0.0173327	0.116334	0.0946107	DLL1/HOXB2/BMPR1A/KIF14	4	Basal-cell
GO:1900376	regulation of secondary metabolite biosynthetic process	4/1229	16/18870	0.0173327	0.116334	0.0946107	SLC24A5/ZEB2/PMEL/TYRP1	4	Basal-cell
GO:1902285	semaphorin-plexin signaling pathway involved in neuron projection guidance	4/1229	16/18870	0.0173327	0.116334	0.0946107	EDN1/PLXNC1/EDNRA/PLXND1	4	Basal-cell
GO:0050867	positive regulation of cell activation	37/1229	396/18870	0.0173444	0.116334	0.0946107	FLNA/SOX12/WNT3A/CCL2/SLC7A1/HES1/TGFB1/EFNB1/PPP3CA/CD276/SMARCD3/GAS6/RUNX3/THBS1/KITLG/CDKN1A/PTPRC/VNN1/MEF2C/LGALS1/TREM2/ADORA2B/GLI2/HLA-DPA1/PTAFR/IL33/HLA-DPB1/HLA-DRA/CAPN3/MYB/PIK3R6/NFATC2/TYROBP/CD83/SPN/FYN/HAVCR2	37	Basal-cell
GO:0001841	neural tube formation	13/1229	104/18870	0.0174703	0.116334	0.0946107	TGFB1/PTK7/CELSR1/ST14/GRHL3/RGMA/IFT172/HIF1A/BMP4/FZD6/DLC1/LRP2/KIF20B	13	Basal-cell
GO:0090100	positive regulation of transmembrane receptor protein serine/threonine kinase signaling pathway	13/1229	104/18870	0.0174703	0.116334	0.0946107	HES1/TGFB1/GPC3/FERMT1/SDCBP/BMP2/THBS1/BMP4/ZEB2/LRG1/NOTCH2/NPNT/BMPR1A	13	Basal-cell
GO:0003148	outflow tract septum morphogenesis	5/1229	24/18870	0.0174808	0.116334	0.0946107	FGFR2/BMP4/LRP2/BMPR1A/ZFPM2	5	Basal-cell
GO:0010839	negative regulation of keratinocyte proliferation	5/1229	24/18870	0.0174808	0.116334	0.0946107	FGFR2/SNAI2/VDR/PTPRK/IFT172	5	Basal-cell
GO:0014821	phasic smooth muscle contraction	5/1229	24/18870	0.0174808	0.116334	0.0946107	EDN1/GDNF/EDN2/KIT/EDNRB	5	Basal-cell
GO:0035162	embryonic hemopoiesis	5/1229	24/18870	0.0174808	0.116334	0.0946107	KITLG/FLT3LG/HIF1A/KIT/TPO	5	Basal-cell
GO:0035235	ionotropic glutamate receptor signaling pathway	5/1229	24/18870	0.0174808	0.116334	0.0946107	APP/GRIN2A/CPEB4/GRIK2/PLP1	5	Basal-cell
GO:0046885	regulation of hormone biosynthetic process	5/1229	24/18870	0.0174808	0.116334	0.0946107	DKK3/WNT4/BMP2/HIF1A/CLCN2	5	Basal-cell
GO:0050650	chondroitin sulfate proteoglycan biosynthetic process	5/1229	24/18870	0.0174808	0.116334	0.0946107	XYLT2/UGDH/CHST15/DSE/CYTL1	5	Basal-cell
GO:0051043	regulation of membrane protein ectodomain proteolysis	5/1229	24/18870	0.0174808	0.116334	0.0946107	APOE/TIMP1/RGMA/TIMP2/SNX33	5	Basal-cell
GO:0060143	positive regulation of syncytium formation by plasma membrane fusion	5/1229	24/18870	0.0174808	0.116334	0.0946107	EHD2/TREM2/CD53/NFATC2/TYROBP	5	Basal-cell
GO:0060571	morphogenesis of an epithelial fold	5/1229	24/18870	0.0174808	0.116334	0.0946107	TP63/FGFR2/HIF1A/BMP4/SOSTDC1	5	Basal-cell
GO:1901863	positive regulation of muscle tissue development	5/1229	24/18870	0.0174808	0.116334	0.0946107	DLL1/WNT3A/CDON/MEF2C/ERBB3	5	Basal-cell
GO:1905048	regulation of metallopeptidase activity	5/1229	24/18870	0.0174808	0.116334	0.0946107	MIR205/TIMP1/TIMP2/SORL1/CLDN4	5	Basal-cell
GO:0007595	lactation	7/1229	42/18870	0.0177597	0.118047	0.0960041	NCOR2/DDR1/VDR/HIF1A/CSN2/CCND1/SOCS2	7	Basal-cell
GO:0032722	positive regulation of chemokine production	10/1229	72/18870	0.0178401	0.118224	0.0961475	POSTN/APP/TGFB1/ALOX15B/HIF1A/ADORA2B/IL33/LPL/CARD9/HAVCR2	10	Basal-cell
GO:0042130	negative regulation of T cell proliferation	10/1229	72/18870	0.0178401	0.118224	0.0961475	PRNP/DLG5/LGALS9B/CBLB/IL20RB/LGALS9C/BMP4/TNFRSF21/SPN/HAVCR2	10	Basal-cell
GO:1902107	positive regulation of leukocyte differentiation	20/1229	185/18870	0.0178723	0.118224	0.0961475	SOX12/TGFB1/PPP3CA/SMARCD3/GAS6/RUNX3/IL34/KITLG/ROR2/PTPRC/VNN1/TREM2/IL20/GLI2/NOTCH2/HCLS1/HLA-DRA/PIK3R6/TYROBP/CD83	20	Basal-cell
GO:1903708	positive regulation of hemopoiesis	20/1229	185/18870	0.0178723	0.118224	0.0961475	SOX12/TGFB1/PPP3CA/SMARCD3/GAS6/RUNX3/IL34/KITLG/ROR2/PTPRC/VNN1/TREM2/IL20/GLI2/NOTCH2/HCLS1/HLA-DRA/PIK3R6/TYROBP/CD83	20	Basal-cell
GO:0051384	response to glucocorticoid	15/1229	127/18870	0.0181902	0.119982	0.0975771	ASS1/ZFP36L2/SERPINF1/EDN1/ANXA3/CDKN1A/AREG/FIBIN/GHR/CLDN1/PTAFR/TRIM63/IGFBP7/UCN/BCHE	15	Basal-cell
GO:0030511	positive regulation of transforming growth factor beta receptor signaling pathway	6/1229	33/18870	0.0183362	0.119982	0.0975771	FERMT1/SDCBP/THBS1/ZEB2/LRG1/NPNT	6	Basal-cell
GO:0099174	regulation of presynapse organization	6/1229	33/18870	0.0183362	0.119982	0.0975771	WNT3A/WNT7A/APP/IL1RAP/SLITRK6/SLITRK2	6	Basal-cell
GO:1903846	positive regulation of cellular response to transforming growth factor beta stimulus	6/1229	33/18870	0.0183362	0.119982	0.0975771	FERMT1/SDCBP/THBS1/ZEB2/LRG1/NPNT	6	Basal-cell
GO:1905207	regulation of cardiocyte differentiation	6/1229	33/18870	0.0183362	0.119982	0.0975771	DLL1/WNT3A/TGFB1/BMP2/BMP4/MEF2C	6	Basal-cell
GO:1905606	regulation of presynapse assembly	6/1229	33/18870	0.0183362	0.119982	0.0975771	WNT3A/WNT7A/APP/IL1RAP/SLITRK6/SLITRK2	6	Basal-cell
GO:1902105	regulation of leukocyte differentiation	31/1229	321/18870	0.0183419	0.119982	0.0975771	ZFP36L2/ASCL2/SOX12/TGFB1/IRF1/PPP3CA/MITF/SMARCD3/HOXA7/GAS6/FOXN1/RUNX3/IL34/NRARP/KITLG/ROR2/PTPRC/BMP4/VNN1/PGLYRP3/TREM2/IL20/GLI2/NOTCH2/HCLS1/HLA-DRA/PIK3R6/BATF/TYROBP/CD83/NFAM1	31	Basal-cell
GO:0046824	positive regulation of nucleocytoplasmic transport	9/1229	62/18870	0.018376	0.119982	0.0975771	FLNA/SMAD3/TGFB1/CHP2/GAS6/HCLS1/EFCAB7/CDK1/XPO4	9	Basal-cell
GO:0051306	mitotic sister chromatid separation	9/1229	62/18870	0.018376	0.119982	0.0975771	TTK/CDC20/SPC25/NUF2/NDC80/CDCA8/SPC24/UBE2C/BUB1B	9	Basal-cell
GO:0051653	spindle localization	9/1229	62/18870	0.018376	0.119982	0.0975771	ITGB1/GPSM2/SPRY1/NDC80/SPAG5/KIF25/CENPA/NUSAP1/PKHD1	9	Basal-cell
GO:0003197	endocardial cushion development	8/1229	52/18870	0.0184481	0.119982	0.0975771	SNAI2/BMP2/BMP4/ERBB3/HEY1/BMPR1A/ADAMTS5/SOX9	8	Basal-cell
GO:0050819	negative regulation of coagulation	8/1229	52/18870	0.0184481	0.119982	0.0975771	KRT1/PDGFA/APOE/EDN1/PROS1/SERPING1/THBS1/PROCR	8	Basal-cell
GO:1902895	positive regulation of miRNA transcription	8/1229	52/18870	0.0184481	0.119982	0.0975771	SMAD3/TGFB1/BMP2/NGFR/HIF1A/MYB/BMPR1A/SREBF2	8	Basal-cell
GO:0014855	striated muscle cell proliferation	11/1229	83/18870	0.0185164	0.119982	0.0975771	FGFR2/TP73/CAV2/TENM4/MEF2C/SIX5/NDC80/MYB/BMPR1A/CDK1/ZFPM2	11	Basal-cell
GO:0031424	keratinization	11/1229	83/18870	0.0185164	0.119982	0.0975771	KRT1/KRT5/KLK5/KRT80/CASP14/CERS3/KRT77/KRT2/KRT73/TMEM79/SPRR2E	11	Basal-cell
GO:0050848	regulation of calcium-mediated signaling	11/1229	83/18870	0.0185164	0.119982	0.0975771	CDH13/PRNP/FHL2/CHP2/PPP3CA/TREM2/ERBB3/GPR143/CALM3/CHP1/MAPT	11	Basal-cell
GO:0051149	positive regulation of muscle cell differentiation	11/1229	83/18870	0.0185164	0.119982	0.0975771	NRG1/WNT3A/TGFB1/EDN1/SMARCD3/HOPX/PIAS1/LAMC1/BMP4/MEF2C/KIT	11	Basal-cell
GO:0048592	eye morphogenesis	18/1229	162/18870	0.0185309	0.119982	0.0975771	EFEMP1/DLL1/FJX1/TSKU/NTRK2/COL5A1/FAT1/COL5A2/CDON/IFT172/PTPRM/LRP5/WNT16/HIF1A/BMP4/NOTCH2/SDK2/SOX9	18	Basal-cell
GO:0010633	negative regulation of epithelial cell migration	14/1229	116/18870	0.0185688	0.120053	0.0976351	DCN/MIR205/APOE/TGFB1/ADIPOR1/SERPINF1/THBS1/SPRED1/PTPRM/CARD10/MEF2C/EVL/MMRN2/MARVELD3	14	Basal-cell
GO:0016042	lipid catabolic process	32/1229	334/18870	0.0185856	0.120053	0.0976351	APOE/SULT1E1/PLCD4/SRD5A3/PLCD3/ACER3/HPGD/HACL1/PLA2G4E/PLD1/SORL1/AKR1B10/PLA2G7/ASPG/ENPP2/HSD17B14/ACOT7/PLBD1/SLC27A4/LPL/PHYH/ASAH1/CES1/PNPLA1/CRAT/ILVBL/ACAA2/OXCT1/PIK3CG/NCEH1/PNPLA7/ABHD3	32	Basal-cell
GO:0019722	calcium-mediated signaling	22/1229	210/18870	0.0187869	0.120588	0.0980705	CDH13/PRNP/ACKR3/FHL2/DEFB1/CHP2/PPP3CA/EDN1/GRIN2A/EDN2/PTPRC/TREM2/ERBB3/EDNRB/DMD/GPR143/SGCD/DMTN/CALM3/NFATC2/CHP1/MAPT	22	Basal-cell
GO:0010586	miRNA metabolic process	13/1229	105/18870	0.0187914	0.120588	0.0980705	NFIB/SMAD3/NCOR2/TGFB1/BMP2/NGFR/HIF1A/BMP4/MYB/BMPR1A/SOX9/SREBF2/PARN	13	Basal-cell
GO:0110020	regulation of actomyosin structure organization	13/1229	105/18870	0.0187914	0.120588	0.0980705	SMAD3/WNT4/MET/EDN1/ARAP1/PHLDB2/ARHGEF10/ARHGEF5/DLC1/TJP1/EVL/BAG4/ARHGEF10L	13	Basal-cell
GO:0007091	metaphase/anaphase transition of mitotic cell cycle	12/1229	94/18870	0.0187997	0.120588	0.0980705	SMARCD3/BCL7A/TACC3/TTK/CDC20/SPC25/NUF2/NDC80/CDCA8/SPC24/UBE2C/BUB1B	12	Basal-cell
GO:0051492	regulation of stress fiber assembly	12/1229	94/18870	0.0187997	0.120588	0.0980705	SMAD3/WNT4/MET/ARAP1/PHLDB2/ARHGEF10/ARHGEF5/DLC1/TJP1/EVL/BAG4/ARHGEF10L	12	Basal-cell
GO:0060048	cardiac muscle contraction	16/1229	139/18870	0.0188363	0.120588	0.0980705	FLNA/DSP/KCNJ2/TNNI2/SCN4B/DSG2/BIN1/DMD/PKP2/SGCD/KCNE4/CALM3/GSN/KCNN2/UCN/PIK3CG	16	Basal-cell
GO:0032640	tumor necrosis factor production	20/1229	186/18870	0.018844	0.120588	0.0980705	APP/TGFB1/SPON2/GAS6/IFNGR1/THBS1/CX3CL1/PTPRC/MC1R/TREM2/AKAP12/PTAFR/IL33/ARID5A/LPL/CD36/CARD9/TYROBP/SPN/HAVCR2	20	Basal-cell
GO:0032680	regulation of tumor necrosis factor production	20/1229	186/18870	0.018844	0.120588	0.0980705	APP/TGFB1/SPON2/GAS6/IFNGR1/THBS1/CX3CL1/PTPRC/MC1R/TREM2/AKAP12/PTAFR/IL33/ARID5A/LPL/CD36/CARD9/TYROBP/SPN/HAVCR2	20	Basal-cell
GO:0045931	positive regulation of mitotic cell cycle	15/1229	128/18870	0.0194084	0.123911	0.100773	CCND2/SMOC2/HSPA2/APP/HES1/SMARCD3/TTL/CCDC57/ADAMTS1/RRM2/CCND1/CDC20/UBE2C/CDK1/MEIS2	15	Basal-cell
GO:0097237	cellular response to toxic substance	15/1229	128/18870	0.0194084	0.123911	0.100773	GPX1/PTGS1/APOE/GSTM3/TXNDC17/GSTM1/RDH12/AKR1B10/GPX8/SOD3/GPX6/CD36/CERS1/ALOX5AP/TPO	15	Basal-cell
GO:0055002	striated muscle cell development	10/1229	73/18870	0.0195059	0.12439	0.101162	ITGB1/MEF2A/TNNT1/MYL9/MYOM2/EDN1/NEBL/TNNT3/TMOD1/CAPN3	10	Basal-cell
GO:0008361	regulation of cell size	20/1229	187/18870	0.0198562	0.12644	0.10283	WNT3/SLC12A4/WNT3A/APOE/EDN1/TTL/RGMA/VAV2/CRABP2/RUFY3/MAP1B/LAMTOR4/TRPV2/L1CAM/ARHGAP4/IQGAP3/UCN/MAPT/FN1/DEPTOR	20	Basal-cell
GO:0061640	cytoskeleton-dependent cytokinesis	14/1229	117/18870	0.0198735	0.12644	0.10283	KIF20A/SNX33/ROPN1B/CIT/KIF23/ANLN/MITD1/CDCA8/EXOC6/EFHC1/KIF20B/IQGAP3/CENPA/NUSAP1	14	Basal-cell
GO:0045444	fat cell differentiation	25/1229	248/18870	0.0199566	0.126822	0.10314	LAMB3/SLC39A13/ZFP36L2/ERAP1/DLK2/GPX1/SNAI2/WNT3A/SMAD3/HES1/TGFB1/SULT1E1/BMP2/NR1D1/WNT5B/ADIRF/PIAS1/LRP5/METRNL/SORT1/LRP3/LRG1/CCND1/LPL/ZFPM2	25	Basal-cell
GO:0070555	response to interleukin-1	16/1229	140/18870	0.0200275	0.127018	0.1033	CCL2/APP/HES1/EDN1/IL1RAP/NR1D1/IL1R2/CX3CL1/HIF1A/AKAP12/RPS6KA5/GHR/TRIM63/MMP2/SOX9/OTUD4	16	Basal-cell
GO:0001666	response to hypoxia	29/1229	298/18870	0.0200414	0.127018	0.1033	PDLIM1/POSTN/FGFR2/ITGA2/SLC2A1/ASCL2/AJUBA/SMAD3/TGFB1/EDN1/EPAS1/PSEN2/BMP2/PMAIP1/THBS1/EDNRA/ANGPTL4/CPEB2/HIF1A/TREM2/SOD3/PLEKHN1/MMP2/MYB/ARNT2/ACAA2/WTIP/FZD4/MIEF1	29	Basal-cell
GO:0003176	aortic valve development	7/1229	43/18870	0.0200567	0.127018	0.1033	SNAI2/TGFB1/BMP2/BMP4/HEY1/ADAMTS5/SOX9	7	Basal-cell
GO:0048678	response to axon injury	11/1229	84/18870	0.0200959	0.12712	0.103382	FLNA/TNC/RGMA/RTN4RL2/MAP1B/TREM2/APOD/MMP2/CDK1/TYROBP/RANGAP1	11	Basal-cell
GO:0000768	syncytium formation by plasma membrane fusion	9/1229	63/18870	0.0202408	0.127304	0.103532	ITGB1/SH3PXD2A/EHD2/CDON/TREM2/CD53/ADAMTS5/NFATC2/TYROBP	9	Basal-cell
GO:0051893	regulation of focal adhesion assembly	9/1229	63/18870	0.0202408	0.127304	0.103532	COL16A1/SMAD3/WNT4/PHLDB2/THBS1/DLC1/APOD/DMTN/FMN1	9	Basal-cell
GO:0051965	positive regulation of synapse assembly	9/1229	63/18870	0.0202408	0.127304	0.103532	THBS2/CLSTN1/DLG5/WNT7A/NTRK2/IL1RAP/TPBG/SLITRK6/SLITRK2	9	Basal-cell
GO:0090109	regulation of cell-substrate junction assembly	9/1229	63/18870	0.0202408	0.127304	0.103532	COL16A1/SMAD3/WNT4/PHLDB2/THBS1/DLC1/APOD/DMTN/FMN1	9	Basal-cell
GO:0140253	cell-cell fusion	9/1229	63/18870	0.0202408	0.127304	0.103532	ITGB1/SH3PXD2A/EHD2/CDON/TREM2/CD53/ADAMTS5/NFATC2/TYROBP	9	Basal-cell
GO:0002053	positive regulation of mesenchymal cell proliferation	5/1229	25/18870	0.0207092	0.129657	0.105445	FGFR2/PDGFA/LRP5/BMPR1A/SOX9	5	Basal-cell
GO:0008211	glucocorticoid metabolic process	5/1229	25/18870	0.0207092	0.129657	0.105445	DKK3/CBR1/WNT4/BMP2/STAR	5	Basal-cell
GO:0045662	negative regulation of myoblast differentiation	5/1229	25/18870	0.0207092	0.129657	0.105445	DLL1/TGFB1/BMP4/SOSTDC1/SOX9	5	Basal-cell
GO:0050927	positive regulation of positive chemotaxis	5/1229	25/18870	0.0207092	0.129657	0.105445	CDH13/ITGA2/SMAD3/IL16/NTF3	5	Basal-cell
GO:0006026	aminoglycan catabolic process	6/1229	34/18870	0.0210738	0.13149	0.106937	TGFB1/CTBS/PGLYRP3/HMMR/LYVE1/CHI3L2	6	Basal-cell
GO:0060317	cardiac epithelial to mesenchymal transition	6/1229	34/18870	0.0210738	0.13149	0.106937	SNAI2/SPRY1/BMP2/EMP2/WNT16/HEY1	6	Basal-cell
GO:0070293	renal absorption	6/1229	34/18870	0.0210738	0.13149	0.106937	EDN1/GAS6/EDNRA/EDNRB/GSN/CLDN4	6	Basal-cell
GO:1904064	positive regulation of cation transmembrane transport	16/1229	141/18870	0.0212752	0.132342	0.10763	FLNA/ATP1B3/KCNJ2/CHP2/PPP3CA/EDN1/EDNRA/JPH2/BDKRB1/CX3CL1/TREM2/DMD/CAPN3/CALM3/PLP1/CHP1	16	Basal-cell
GO:0060415	muscle tissue morphogenesis	10/1229	74/18870	0.0212827	0.132342	0.10763	FGFR2/NRG1/DSP/TGFB1/BMP2/EDNRA/PKP2/LRP2/BMPR1A/ZFPM2	10	Basal-cell
GO:1905818	regulation of chromosome separation	10/1229	74/18870	0.0212827	0.132342	0.10763	NCAPH/TTK/CDC20/SPC25/NUF2/NDC80/CDCA8/SPC24/UBE2C/BUB1B	10	Basal-cell
GO:0090068	positive regulation of cell cycle process	26/1229	262/18870	0.0213941	0.132885	0.108071	CCND2/HSPA2/GPSM2/APP/WNT4/EDN1/SMARCD3/LRP5/ADAMTS1/RRM2/CIT/NCAPH/KIF23/CCND1/CDC20/NDC80/CDCA8/KAT2B/UBE2C/SPAG5/KIF20B/CDK1/PLK4/KIF14/NUSAP1/DYRK3	26	Basal-cell
GO:0006570	tyrosine metabolic process	4/1229	17/18870	0.0215222	0.13293	0.108107	OCA2/PCBD1/DCT/TYR	4	Basal-cell
GO:0030202	heparin metabolic process	4/1229	17/18870	0.0215222	0.13293	0.108107	XYLT2/EDNRA/EXT2/EDNRB	4	Basal-cell
GO:0031268	pseudopodium organization	4/1229	17/18870	0.0215222	0.13293	0.108107	CDC42EP4/RAB25/KIT/SRGAP2	4	Basal-cell
GO:0036005	response to macrophage colony-stimulating factor	4/1229	17/18870	0.0215222	0.13293	0.108107	MST1R/PDE1B/TREM2/DOK1	4	Basal-cell
GO:0071071	regulation of phospholipid biosynthetic process	4/1229	17/18870	0.0215222	0.13293	0.108107	PDGFA/SLC27A1/LPCAT1/CHP1	4	Basal-cell
GO:0002526	acute inflammatory response	13/1229	107/18870	0.0216576	0.133616	0.108665	ASS1/IL20RB/OSMR/VNN1/EDNRB/SAA1/SIGIRR/PIK3CG/SPN/FCER1A/ALOX5AP/FN1/DNASE1L3	13	Basal-cell
GO:1903131	mononuclear cell differentiation	43/1229	481/18870	0.0218321	0.134265	0.109193	JAG2/DLL1/ZFP36L2/ITGB1/ASCL2/LY6D/SOX12/LFNG/WNT4/TGFB1/IRF1/PIR/SMARCD3/HOXA7/GAS6/FOXN1/RUNX3/ITGB8/IL34/NRARP/TMEM98/PTPRC/PDE1B/PREX1/BMP4/VNN1/PGLYRP3/LGALS1/TREM2/KIT/GLI2/NOTCH2/HLA-DRA/PRR7/MYB/PIK3R6/MT1G/IKZF1/BATF/CD83/NFAM1/SPN/HHEX	43	Basal-cell
GO:0045666	positive regulation of neuron differentiation	12/1229	96/18870	0.0218605	0.134265	0.109193	TCF4/TGIF2/ETV5/CDON/BMP2/MAP1B/BMP4/MEF2C/S100B/BRINP1/DUOXA1/SOCS2	12	Basal-cell
GO:0051310	metaphase chromosome alignment	12/1229	96/18870	0.0218605	0.134265	0.109193	TTL/GEM/PSRC1/SPC25/NUF2/NDC80/CDCA8/SPC24/KAT2B/KIFC1/SPAG5/KIF14	12	Basal-cell
GO:0070664	negative regulation of leukocyte proliferation	12/1229	96/18870	0.0218605	0.134265	0.109193	PRNP/DLG5/LGALS9B/CBLB/IL20RB/LGALS9C/BMP4/TNFRSF21/IL33/TYROBP/SPN/HAVCR2	12	Basal-cell
GO:0032388	positive regulation of intracellular transport	21/1229	201/18870	0.0219064	0.134397	0.109301	FLNA/PRNP/EHD2/SMAD3/TGFB1/BAP1/CHP2/GAS6/PLA2G4E/RUFY3/SORL1/HCLS1/EFCAB7/SPAG5/KIF20B/CDK1/SREBF2/XPO4/CHP1/MIEF1/FYN	21	Basal-cell
GO:0001764	neuron migration	19/1229	177/18870	0.0220138	0.134905	0.109714	ITGA3/FLNA/NTRK2/AUTS2/CELSR1/GAS6/MARK1/CHL1/TUBA1A/MAP1B/CX3CL1/MEF2C/WDR62/TUBB2B/KIF20B/ELP3/SRGAP2/CAMK2B/FYN	19	Basal-cell
GO:0030225	macrophage differentiation	9/1229	64/18870	0.0222382	0.136129	0.110709	APP/TGFB1/IL34/ROR2/BMP4/HCLS1/IL33/GAB3/TSPAN2	9	Basal-cell
GO:0060428	lung epithelium development	7/1229	44/18870	0.022553	0.137748	0.112026	FGFR2/NFIB/TP73/ERRFI1/BMP4/RBBP9/SOX9	7	Basal-cell
GO:0071526	semaphorin-plexin signaling pathway	7/1229	44/18870	0.022553	0.137748	0.112026	FLNA/MET/EDN1/GDNF/PLXNC1/EDNRA/PLXND1	7	Basal-cell
GO:0001889	liver development	16/1229	142/18870	0.0225811	0.137767	0.112041	ASS1/ITGA2/WNT3A/SMAD3/HES1/WNT4/MET/SLC7A5/FPGS/CLDN1/NOTCH2/UGT1A10/CCND1/NKX2-8/LIMS2/SOX9	16	Basal-cell
GO:0032609	type II interferon production	14/1229	119/18870	0.0226889	0.137965	0.112203	PRNP/LGALS9B/SLC7A5/CD276/IL20RB/GAS6/LGALS9C/BTN3A1/PGLYRP3/HLA-DPA1/IL33/HLA-DPB1/ARID5A/HAVCR2	14	Basal-cell
GO:0032649	regulation of type II interferon production	14/1229	119/18870	0.0226889	0.137965	0.112203	PRNP/LGALS9B/SLC7A5/CD276/IL20RB/GAS6/LGALS9C/BTN3A1/PGLYRP3/HLA-DPA1/IL33/HLA-DPB1/ARID5A/HAVCR2	14	Basal-cell
GO:1990748	cellular detoxification	14/1229	119/18870	0.0226889	0.137965	0.112203	GPX1/PTGS1/APOE/GSTM3/TXNDC17/GSTM1/RDH12/AKR1B10/GPX8/SOD3/GPX6/CD36/ALOX5AP/TPO	14	Basal-cell
GO:0021537	telencephalon development	27/1229	276/18870	0.0227788	0.138056	0.112276	FLNA/SLC2A1/NFIB/WNT3A/TSKU/HES1/NTRK2/CDON/ANXA3/BMP2/TUBB2A/TUBA1A/UBA6/HIF1A/BMP4/BCAN/TACC3/SYNE2/FOXP2/SLC1A2/WDR62/EFHC1/TUBB2B/TMEM108/SRGAP2/CCDC85C/KIF14	27	Basal-cell
GO:0051298	centrosome duplication	10/1229	75/18870	0.0231743	0.138056	0.112276	ARHGEF10/TMEM67/CCDC57/NDC80/CEP72/WDR62/KAT2B/PLK4/PKHD1/BRCA1	10	Basal-cell
GO:0061045	negative regulation of wound healing	10/1229	75/18870	0.0231743	0.138056	0.112276	KRT1/PDGFA/APOE/SMAD3/WNT4/EDN1/PROS1/PHLDB2/SERPING1/THBS1	10	Basal-cell
GO:0090630	activation of GTPase activity	13/1229	108/18870	0.0232071	0.138056	0.112276	TAX1BP3/NGEF/ARHGEF10/ARHGEF5/ARHGAP29/SIPA1L3/TBC1D1/SLC27A4/ARHGAP22/TBC1D8B/NTF3/AGAP6/RANGAP1	13	Basal-cell
GO:0001886	endothelial cell morphogenesis	3/1229	10/18870	0.0234015	0.138056	0.112276	COL18A1/MET/PLOD3	3	Basal-cell
GO:0003253	cardiac neural crest cell migration involved in outflow tract morphogenesis	3/1229	10/18870	0.0234015	0.138056	0.112276	EDN1/EDNRA/BMP4	3	Basal-cell
GO:0003418	growth plate cartilage chondrocyte differentiation	3/1229	10/18870	0.0234015	0.138056	0.112276	TSKU/ANXA6/SOX9	3	Basal-cell
GO:0006868	glutamine transport	3/1229	10/18870	0.0234015	0.138056	0.112276	SLC38A5/SLC1A5/SLC1A4	3	Basal-cell
GO:0014820	tonic smooth muscle contraction	3/1229	10/18870	0.0234015	0.138056	0.112276	EDN1/EDNRA/EDN2	3	Basal-cell
GO:0014889	muscle atrophy	3/1229	10/18870	0.0234015	0.138056	0.112276	GATM/TRIM63/GSN	3	Basal-cell
GO:0032329	serine transport	3/1229	10/18870	0.0234015	0.138056	0.112276	SLC38A5/SLC1A5/SLC1A4	3	Basal-cell
GO:0032353	negative regulation of hormone biosynthetic process	3/1229	10/18870	0.0234015	0.138056	0.112276	DKK3/WNT4/BMP2	3	Basal-cell
GO:0034651	cortisol biosynthetic process	3/1229	10/18870	0.0234015	0.138056	0.112276	DKK3/WNT4/BMP2	3	Basal-cell
GO:0035907	dorsal aorta development	3/1229	10/18870	0.0234015	0.138056	0.112276	NGFR/HEY1/BMPR1A	3	Basal-cell
GO:0048023	positive regulation of melanin biosynthetic process	3/1229	10/18870	0.0234015	0.138056	0.112276	ZEB2/PMEL/TYRP1	3	Basal-cell
GO:0048340	paraxial mesoderm morphogenesis	3/1229	10/18870	0.0234015	0.138056	0.112276	WNT3A/SMAD3/BMPR1A	3	Basal-cell
GO:0048672	positive regulation of collateral sprouting	3/1229	10/18870	0.0234015	0.138056	0.112276	WNT3/WNT3A/CRABP2	3	Basal-cell
GO:0048865	stem cell fate commitment	3/1229	10/18870	0.0234015	0.138056	0.112276	EDN1/EDNRA/SOX9	3	Basal-cell
GO:0055015	ventricular cardiac muscle cell development	3/1229	10/18870	0.0234015	0.138056	0.112276	MEF2A/FHL2/CDK1	3	Basal-cell
GO:0060054	positive regulation of epithelial cell proliferation involved in wound healing	3/1229	10/18870	0.0234015	0.138056	0.112276	WNT7A/LRG1/CLDN1	3	Basal-cell
GO:0061299	retina vasculature morphogenesis in camera-type eye	3/1229	10/18870	0.0234015	0.138056	0.112276	LRP5/COL4A1/FZD4	3	Basal-cell
GO:0090184	positive regulation of kidney development	3/1229	10/18870	0.0234015	0.138056	0.112276	WNT4/PPP3CA/SOX9	3	Basal-cell
GO:1900378	positive regulation of secondary metabolite biosynthetic process	3/1229	10/18870	0.0234015	0.138056	0.112276	ZEB2/PMEL/TYRP1	3	Basal-cell
GO:1902224	ketone body metabolic process	3/1229	10/18870	0.0234015	0.138056	0.112276	TYRP1/SLC27A5/OXCT1	3	Basal-cell
GO:1902645	tertiary alcohol biosynthetic process	3/1229	10/18870	0.0234015	0.138056	0.112276	DKK3/WNT4/BMP2	3	Basal-cell
GO:1903365	regulation of fear response	3/1229	10/18870	0.0234015	0.138056	0.112276	APOE/MEF2C/UCN	3	Basal-cell
GO:0051983	regulation of chromosome segregation	15/1229	131/18870	0.0234361	0.138056	0.112276	SMARCD3/BCL7A/TACC3/NCAPH/TTK/CDC20/SPC25/NUF2/NDC80/CDCA8/SPC24/KAT2B/UBE2C/BUB1B/CDK1	15	Basal-cell
GO:0055007	cardiac muscle cell differentiation	15/1229	131/18870	0.0234361	0.138056	0.112276	DLL1/ITGB1/MEF2A/NRG1/FHL2/WNT3A/TGFB1/EDN1/BMP2/NEBL/BMP4/MEF2C/SGCD/BMPR1A/CDK1	15	Basal-cell
GO:0044784	metaphase/anaphase transition of cell cycle	12/1229	97/18870	0.0235222	0.138056	0.112276	SMARCD3/BCL7A/TACC3/TTK/CDC20/SPC25/NUF2/NDC80/CDCA8/SPC24/UBE2C/BUB1B	12	Basal-cell
GO:0061337	cardiac conduction	12/1229	97/18870	0.0235222	0.138056	0.112276	FLNA/MEF2A/DSP/KCNJ2/ATP2B1/SCN4B/DSG2/BIN1/PKP2/KCNE4/CALM3/KCNN2	12	Basal-cell
GO:1903035	negative regulation of response to wounding	12/1229	97/18870	0.0235222	0.138056	0.112276	KRT1/PDGFA/APOE/SMAD3/WNT4/EDN1/PROS1/PHLDB2/RGMA/SERPING1/THBS1/IL33	12	Basal-cell
GO:0032370	positive regulation of lipid transport	11/1229	86/18870	0.0235497	0.138056	0.112276	DBI/APOE/ABCA1/EDN1/LPCAT3/ACSL1/ABCA8/TREM2/PLA2R1/CES1/MYB	11	Basal-cell
GO:0033273	response to vitamin	11/1229	86/18870	0.0235497	0.138056	0.112276	POSTN/ITGA2/GPX1/SNAI2/TNC/VDR/GAS6/MAP1B/TYR/PRKCB/BCHE	11	Basal-cell
GO:0045055	regulated exocytosis	23/1229	227/18870	0.0235576	0.138056	0.112276	SYT8/WNT7A/ANXA3/CACNB4/RAB31/RAB27A/ADORA2B/RAB11FIP5/STX11/KIT/SYT17/CADPS/PTAFR/SYN1/TMEM79/RAB11FIP1/SCIN/SYT7/PRKCB/PIK3CG/FCER1A/MICAL1/VPS18	23	Basal-cell
GO:0034341	response to type II interferon	16/1229	143/18870	0.0239466	0.13929	0.11328	ASS1/IFITM3/IFITM1/CCL2/IRF1/EDN1/ZYX/IFNGR1/IFITM2/VIM/CDC42EP4/CX3CL1/CLDN1/HLA-DPA1/SLC26A6/GSN	16	Basal-cell
GO:0000132	establishment of mitotic spindle orientation	6/1229	35/18870	0.0240751	0.13929	0.11328	ITGB1/GPSM2/SPRY1/NDC80/CENPA/PKHD1	6	Basal-cell
GO:0030224	monocyte differentiation	6/1229	35/18870	0.0240751	0.13929	0.11328	PIR/HOXA7/IL34/PDE1B/BMP4/MT1G	6	Basal-cell
GO:0008645	hexose transmembrane transport	14/1229	120/18870	0.0242036	0.13929	0.11328	SLC2A1/MEF2A/SLC2A5/EDN1/SLC27A1/GPC3/EDNRA/CLTCL1/SORT1/SLC45A3/FABP5/SLC1A2/SLC27A4/PRKCB	14	Basal-cell
GO:0044839	cell cycle G2/M phase transition	17/1229	155/18870	0.0242603	0.13929	0.11328	HSPA2/RBBP8/APP/FHL1/SMARCD3/BACH1/CDKN1A/CCDC57/CCND1/NDC80/BLM/CALM3/FOXM1/CDK1/KIF14/DYRK3/BRCA1	17	Basal-cell
GO:0045807	positive regulation of endocytosis	17/1229	155/18870	0.0242603	0.13929	0.11328	DLL1/ITGA2/WNT3A/APOE/CCL2/CD151/IL2RB/PPP3CA/GAS6/GPC3/RAB31/PTPRC/TREM2/RAB27A/BIN1/CD36/NTF3	17	Basal-cell
GO:0001835	blastocyst hatching	5/1229	26/18870	0.0243029	0.13929	0.11328	RBBP8/LPAR6/STMN3/NECAB1/ST8SIA6	5	Basal-cell
GO:0014829	vascular associated smooth muscle contraction	5/1229	26/18870	0.0243029	0.13929	0.11328	EDN1/ATP2B1/EDNRA/EDN2/EDNRB	5	Basal-cell
GO:0031579	membrane raft organization	5/1229	26/18870	0.0243029	0.13929	0.11328	CAV2/EMP2/PTPRC/MAL/GSN	5	Basal-cell
GO:0034643	establishment of mitochondrion localization, microtubule-mediated	5/1229	26/18870	0.0243029	0.13929	0.11328	MAP1B/HIF1A/SYBU/RHOT1/MAPT	5	Basal-cell
GO:0035188	hatching	5/1229	26/18870	0.0243029	0.13929	0.11328	RBBP8/LPAR6/STMN3/NECAB1/ST8SIA6	5	Basal-cell
GO:0035330	regulation of hippo signaling	5/1229	26/18870	0.0243029	0.13929	0.11328	AJUBA/DLG5/MOB3B/CIT/WTIP	5	Basal-cell
GO:0047497	mitochondrion transport along microtubule	5/1229	26/18870	0.0243029	0.13929	0.11328	MAP1B/HIF1A/SYBU/RHOT1/MAPT	5	Basal-cell
GO:0048641	regulation of skeletal muscle tissue development	5/1229	26/18870	0.0243029	0.13929	0.11328	DLL1/WNT3A/TGFB1/CDON/MEF2C	5	Basal-cell
GO:0050926	regulation of positive chemotaxis	5/1229	26/18870	0.0243029	0.13929	0.11328	CDH13/ITGA2/SMAD3/IL16/NTF3	5	Basal-cell
GO:0060343	trabecula formation	5/1229	26/18870	0.0243029	0.13929	0.11328	FHL2/SLC40A1/ADAMTS1/MMP2/HEY1	5	Basal-cell
GO:0061311	cell surface receptor signaling pathway involved in heart development	5/1229	26/18870	0.0243029	0.13929	0.11328	SNAI2/WNT3A/BMP2/NOTCH2/HEY1	5	Basal-cell
GO:0071684	organism emergence from protective structure	5/1229	26/18870	0.0243029	0.13929	0.11328	RBBP8/LPAR6/STMN3/NECAB1/ST8SIA6	5	Basal-cell
GO:0071706	tumor necrosis factor superfamily cytokine production	20/1229	191/18870	0.0243312	0.13929	0.11328	APP/TGFB1/SPON2/GAS6/IFNGR1/THBS1/CX3CL1/PTPRC/MC1R/TREM2/AKAP12/PTAFR/IL33/ARID5A/LPL/CD36/CARD9/TYROBP/SPN/HAVCR2	20	Basal-cell
GO:1903555	regulation of tumor necrosis factor superfamily cytokine production	20/1229	191/18870	0.0243312	0.13929	0.11328	APP/TGFB1/SPON2/GAS6/IFNGR1/THBS1/CX3CL1/PTPRC/MC1R/TREM2/AKAP12/PTAFR/IL33/ARID5A/LPL/CD36/CARD9/TYROBP/SPN/HAVCR2	20	Basal-cell
GO:0010812	negative regulation of cell-substrate adhesion	9/1229	65/18870	0.024373	0.13929	0.11328	POSTN/HOXA7/PHLDB2/THBS1/CX3CL1/DLC1/APOD/DMTN/FZD4	9	Basal-cell
GO:0035904	aorta development	9/1229	65/18870	0.024373	0.13929	0.11328	MIR205/HES1/AP2B1/NGFR/EDNRA/PLXND1/HEY1/LRP2/BMPR1A	9	Basal-cell
GO:0030509	BMP signaling pathway	18/1229	167/18870	0.024411	0.13929	0.11328	ITGA3/HTRA1/FAM83G/HES1/GPC3/RGMA/BMP2/TMPRSS6/SORL1/BMP4/NOTCH2/SOSTDC1/LRP2/SCX/BMPR1A/FST/ETV2/DLX3	18	Basal-cell
GO:0071772	response to BMP	19/1229	179/18870	0.0244268	0.13929	0.11328	ITGA3/HTRA1/FAM83G/HES1/GPC3/RGMA/BMP2/TMPRSS6/SORL1/BMP4/NOTCH2/SOSTDC1/LRP2/SCX/BMPR1A/FST/SOX9/ETV2/DLX3	19	Basal-cell
GO:0071773	cellular response to BMP stimulus	19/1229	179/18870	0.0244268	0.13929	0.11328	ITGA3/HTRA1/FAM83G/HES1/GPC3/RGMA/BMP2/TMPRSS6/SORL1/BMP4/NOTCH2/SOSTDC1/LRP2/SCX/BMPR1A/FST/SOX9/ETV2/DLX3	19	Basal-cell
GO:0043254	regulation of protein-containing complex assembly	38/1229	419/18870	0.024427	0.13929	0.11328	NRG1/LCAT/AJUBA/APOE/ABCA1/HES1/TGFB1/MET/SPTBN2/FERMT1/CDC42EP4/SVIP/MAP1B/ARHGEF5/SORL1/PREX1/TPPP3/TREM2/HJURP/BIN1/EVL/HAUS6/BAG4/TMOD1/PSRC1/TUBB4A/HCLS1/DMTN/LGALS3/ANKRA2/SCIN/GSN/CD36/SOX9/KIF14/FMN1/MAPT/VPS18	38	Basal-cell
GO:0006939	smooth muscle contraction	13/1229	109/18870	0.0248374	0.141337	0.114944	ITGA2/NMU/EDN1/BDKRB2/GDNF/ATP2B1/EDNRA/EDN2/ADORA2B/KIT/EDNRB/PTAFR/NPNT	13	Basal-cell
GO:0061387	regulation of extent of cell growth	13/1229	109/18870	0.0248374	0.141337	0.114944	WNT3/WNT3A/APOE/TTL/RGMA/CRABP2/RUFY3/MAP1B/TRPV2/L1CAM/ARHGAP4/MAPT/FN1	13	Basal-cell
GO:0033173	calcineurin-NFAT signaling cascade	7/1229	45/18870	0.0252557	0.143381	0.116607	PRNP/FHL2/CHP2/PPP3CA/ERBB3/NFATC2/CHP1	7	Basal-cell
GO:0009798	axis specification	12/1229	98/18870	0.0252749	0.143381	0.116607	WNT3/DLL1/IRX4/WLS/WNT7A/ETS2/GPC3/NRARP/IFT172/BMP4/NOTCH2/BMPR1A	12	Basal-cell
GO:0060993	kidney morphogenesis	12/1229	98/18870	0.0252749	0.143381	0.116607	LAMA5/HES1/WNT4/PPP3CA/GPC3/GDNF/BMP2/BMP4/NPNT/SOX9/WNT9B/FMN1	12	Basal-cell
GO:0006022	aminoglycan metabolic process	14/1229	121/18870	0.0257922	0.146014	0.118748	XYLT2/TGFB1/UGDH/CHST15/DSE/EDNRA/CTBS/ITIH5/PGLYRP3/EXT2/HMMR/EDNRB/LYVE1/CHI3L2	14	Basal-cell
GO:0030278	regulation of ossification	14/1229	121/18870	0.0257922	0.146014	0.118748	SMAD3/WNT4/SLC20A2/VDR/KREMEN2/ATP2B1/ANKH/BMP2/HIF1A/BMP4/MEF2C/SRGN/BMPR1A/SOX9	14	Basal-cell
GO:0032328	alanine transport	4/1229	18/18870	0.0262789	0.147856	0.120246	SLC38A5/SLC7A5/SLC1A4/SLC38A4	4	Basal-cell
GO:0043117	positive regulation of vascular permeability	4/1229	18/18870	0.0262789	0.147856	0.120246	APOE/TGFB1/TJP1/UCN	4	Basal-cell
GO:0048486	parasympathetic nervous system development	4/1229	18/18870	0.0262789	0.147856	0.120246	ACKR3/HES1/GDNF/HOXB2	4	Basal-cell
GO:0150079	negative regulation of neuroinflammatory response	4/1229	18/18870	0.0262789	0.147856	0.120246	NR1D1/CX3CL1/PTPRC/TREM2	4	Basal-cell
GO:1904044	response to aldosterone	4/1229	18/18870	0.0262789	0.147856	0.120246	SCNN1A/CDKN1A/PTPRC/CARD9	4	Basal-cell
GO:1905209	positive regulation of cardiocyte differentiation	4/1229	18/18870	0.0262789	0.147856	0.120246	WNT3A/TGFB1/BMP4/MEF2C	4	Basal-cell
GO:0002263	cell activation involved in immune response	29/1229	305/18870	0.0263737	0.148086	0.120433	DLL1/ASCL2/LFNG/APP/TGFB1/ANXA3/TMEM98/PTPRC/PGLYRP3/LGALS1/TREM2/RAB27A/ADORA2B/KIT/NOTCH2/PTAFR/IL33/HLA-DRA/PARP3/LGALS3/MYB/BATF/TYROBP/PIK3CG/SPN/FCER1A/EXO1/DNASE1L3/HAVCR2	29	Basal-cell
GO:0048608	reproductive structure development	29/1229	305/18870	0.0263737	0.148086	0.120433	FLNA/TP63/FGFR2/PLEKHA1/LFNG/WNT7A/WNT4/ALOX15B/TNC/SERPINF1/CSDE1/HOXA9/NHLH2/KITLG/RHOBTB3/ROR2/DHCR24/BMP4/ADAMTS1/KIT/MMP2/LRP2/SCX/FST/SOX9/ZFPM2/WNT9B/PSAP/FZD4	29	Basal-cell
GO:0048593	camera-type eye morphogenesis	15/1229	133/18870	0.0264497	0.148361	0.120657	DLL1/FJX1/TSKU/NTRK2/FAT1/CDON/IFT172/PTPRM/LRP5/WNT16/HIF1A/BMP4/NOTCH2/SDK2/SOX9	15	Basal-cell
GO:0061008	hepaticobiliary system development	16/1229	145/18870	0.0268627	0.150524	0.122417	ASS1/ITGA2/WNT3A/SMAD3/HES1/WNT4/MET/SLC7A5/FPGS/CLDN1/NOTCH2/UGT1A10/CCND1/NKX2-8/LIMS2/SOX9	16	Basal-cell
GO:0032535	regulation of cellular component size	34/1229	370/18870	0.0270508	0.151405	0.123133	WNT3/SLC12A4/LIMA1/WNT3A/APOE/WNT7A/EDN1/TTL/SPTBN2/RGMA/VAV2/CDC42EP4/CRABP2/RUFY3/MAP1B/PREX1/LAMTOR4/BIN1/EVL/BAG4/TRPV2/TMOD1/L1CAM/HCLS1/ARHGAP4/DMTN/SCIN/GSN/IQGAP3/UCN/FMN1/MAPT/FN1/DEPTOR	34	Basal-cell
GO:0007043	cell-cell junction assembly	17/1229	157/18870	0.0270751	0.151405	0.123133	CDH13/SNAI2/PKP1/DLG5/HOPX/CDH22/DSG1/CLDN8/CDH8/FBF1/TJP1/CLDN1/PKP2/POF1B/GJB1/CLDN4/MARVELD3	17	Basal-cell
GO:0021696	cerebellar cortex morphogenesis	6/1229	36/18870	0.0273492	0.152319	0.123876	DLL1/WNT7A/SPTBN2/TUBA1A/GLI2/KIF14	6	Basal-cell
GO:0046164	alcohol catabolic process	6/1229	36/18870	0.0273492	0.152319	0.123876	ALDH3B2/ALDH3B1/APOE/SULT1E1/SRD5A3/AKR1B10	6	Basal-cell
GO:0055023	positive regulation of cardiac muscle tissue growth	6/1229	36/18870	0.0273492	0.152319	0.123876	FGFR2/EDN1/MEF2C/BMPR1A/CDK1/ZFPM2	6	Basal-cell
GO:1905332	positive regulation of morphogenesis of an epithelium	6/1229	36/18870	0.0273492	0.152319	0.123876	WNT4/GDNF/WNT5B/BMP4/SOX9/MMRN2	6	Basal-cell
GO:0050672	negative regulation of lymphocyte proliferation	11/1229	88/18870	0.0274171	0.152542	0.124057	PRNP/DLG5/LGALS9B/CBLB/IL20RB/LGALS9C/BMP4/TNFRSF21/TYROBP/SPN/HAVCR2	11	Basal-cell
GO:0031529	ruffle organization	8/1229	56/18870	0.0277529	0.153788	0.125071	LIMA1/PLEKHA1/AIF1L/EVL/BAG4/INPPL1/STON1/EPS8L1	8	Basal-cell
GO:0034205	amyloid-beta formation	8/1229	56/18870	0.0277529	0.153788	0.125071	PRNP/APOE/NTRK2/IFNGR1/PSEN2/SORL1/BIN1/RTN1	8	Basal-cell
GO:0048168	regulation of neuronal synaptic plasticity	8/1229	56/18870	0.0277529	0.153788	0.125071	APOE/NPTN/APP/GRIN2A/S100B/KIT/GRIK2/CAMK2B	8	Basal-cell
GO:0061097	regulation of protein tyrosine kinase activity	8/1229	56/18870	0.0277529	0.153788	0.125071	PRNP/APP/CBLB/IL34/ERRFI1/PTPRC/ERBB3/PTPN1	8	Basal-cell
GO:0031109	microtubule polymerization or depolymerization	15/1229	134/18870	0.0280602	0.155334	0.126328	MET/KIF18B/TUBA1A/MAP1B/NCKAP5/SKA1/TPPP3/CCDC57/SKA3/HAUS6/PSRC1/TUBB4A/STMN3/MAP7D3/MAPT	15	Basal-cell
GO:0055078	sodium ion homeostasis	7/1229	46/18870	0.0281718	0.155795	0.126703	ATP1B3/SLC1A3/EDN1/EDNRA/SCNN1A/EXT2/EDNRB	7	Basal-cell
GO:0010875	positive regulation of cholesterol efflux	5/1229	27/18870	0.0282741	0.155891	0.126781	APOE/ABCA1/ABCA8/TREM2/CES1	5	Basal-cell
GO:0045672	positive regulation of osteoclast differentiation	5/1229	27/18870	0.0282741	0.155891	0.126781	PPP3CA/TREM2/IL20/NOTCH2/TYROBP	5	Basal-cell
GO:0048714	positive regulation of oligodendrocyte differentiation	5/1229	27/18870	0.0282741	0.155891	0.126781	TP73/IL34/TENM4/CLCN2/IL33	5	Basal-cell
GO:0071347	cellular response to interleukin-1	13/1229	111/18870	0.028349	0.156049	0.12691	CCL2/HES1/EDN1/IL1RAP/NR1D1/IL1R2/CX3CL1/HIF1A/AKAP12/RPS6KA5/MMP2/SOX9/OTUD4	13	Basal-cell
GO:0030177	positive regulation of Wnt signaling pathway	16/1229	146/18870	0.0284164	0.156049	0.12691	WNT3/FGFR2/WLS/WNT3A/SMAD3/TGFB1/PTK7/GPC3/BMP2/WNT5B/NRARP/LGR6/ZEB2/SCEL/DEPDC1B/HHEX	16	Basal-cell
GO:0035107	appendage morphogenesis	16/1229	146/18870	0.0284164	0.156049	0.12691	WNT3/TP63/FGFR2/WNT7A/GPC3/HOXA9/CRABP2/LRP5/BMP4/FZD6/NOTCH2/BMPR1A/SOX9/FMN1/ACD/AFF3	16	Basal-cell
GO:0035108	limb morphogenesis	16/1229	146/18870	0.0284164	0.156049	0.12691	WNT3/TP63/FGFR2/WNT7A/GPC3/HOXA9/CRABP2/LRP5/BMP4/FZD6/NOTCH2/BMPR1A/SOX9/FMN1/ACD/AFF3	16	Basal-cell
GO:0031400	negative regulation of protein modification process	39/1229	437/18870	0.0285415	0.15658	0.127341	DBI/PRNP/APOE/SPRED2/TGFB1/SPRY1/IVNS1ABP/CBLB/BDKRB2/GNAQ/BMP2/PKIB/SPRED1/LRP5/BDKRB1/ERRFI1/IGFBP3/SORL1/CDKN1A/PTPRC/DUSP6/CRY2/DMD/PBK/DMTN/LGALS3/CAPN3/CALM3/PTPN1/NCOA7/NTF3/MICAL1/CHP1/HHEX/MAPT/MIR711/FYN/DEPTOR/BRCA1	39	Basal-cell
GO:0034767	positive regulation of monoatomic ion transmembrane transport	17/1229	158/18870	0.0285709	0.156584	0.127345	FLNA/ATP1B3/CCL2/KCNJ2/CHP2/PPP3CA/EDN1/EDNRA/JPH2/BDKRB1/CX3CL1/TREM2/DMD/CAPN3/CALM3/PLP1/CHP1	17	Basal-cell
GO:0071496	cellular response to external stimulus	32/1229	346/18870	0.0288845	0.158146	0.128615	POSTN/ITGA2/SLC2A1/SNAI2/GLUL/PLIN2/WNT4/KCNJ2/IRF1/UCN2/SLC7A5/TNC/GSDMD/VDR/GAS6/CNN2/PMAIP1/TNFRSF10B/PLD1/CDKN1A/PTPRC/ADORA2B/CPEB4/FADS1/IL33/SLC1A2/LPL/KAT2B/SCX/SOX9/SREBF2/WNT9B	32	Basal-cell
GO:0010038	response to metal ion	33/1229	359/18870	0.0289382	0.158282	0.128725	ASS1/PRNP/MEF2A/CYBRD1/SYT8/TXNIP/CHP2/SERPINF1/PPP3CA/MT2A/EDN1/SLC40A1/MT1E/THBS1/CPNE8/TUBA1A/SLC6A1/HIF1A/FIBIN/MEF2C/KIT/SOD3/SYT17/CLDN1/DMTN/CAPN3/CALM3/MT1G/SYT7/CDK1/NFATC2/ALOX5AP/MAPT	33	Basal-cell
GO:0060349	bone morphogenesis	12/1229	100/18870	0.0290637	0.158696	0.129062	SERPINH1/FGFR2/TSKU/LRP5/BMP4/MEF2C/EXT2/GHR/INPPL1/SCX/ANXA6/SOX9	12	Basal-cell
GO:0006949	syncytium formation	9/1229	67/18870	0.0290717	0.158696	0.129062	ITGB1/SH3PXD2A/EHD2/CDON/TREM2/CD53/ADAMTS5/NFATC2/TYROBP	9	Basal-cell
GO:0015749	monosaccharide transmembrane transport	14/1229	123/18870	0.029199	0.159233	0.129499	SLC2A1/MEF2A/SLC2A5/EDN1/SLC27A1/GPC3/EDNRA/CLTCL1/SORT1/SLC45A3/FABP5/SLC1A2/SLC27A4/PRKCB	14	Basal-cell
GO:0043523	regulation of neuron apoptotic process	23/1229	232/18870	0.0293992	0.160007	0.130129	PRNP/APOE/CCL2/NTRK2/NTF4/PRODH/GDNF/SIGMAR1/CHL1/PLXND1/CX3CL1/HIF1A/MEF2C/TREM2/ERBB3/CPEB4/CCND1/GRIK2/MYB/NTF3/KIF14/UCN/MYBL2	23	Basal-cell
GO:0050920	regulation of chemotaxis	23/1229	232/18870	0.0293992	0.160007	0.130129	CDH13/WNT3/SMOC2/ITGA2/WNT3A/CCL2/SMAD3/TGFB1/MET/EDN1/GAS6/TPBG/MMP28/IL34/THBS1/EDN2/PLA2G7/TREM2/IL16/TUBB2B/GPSM3/NTF3/PADI2	23	Basal-cell
GO:0032945	negative regulation of mononuclear cell proliferation	11/1229	89/18870	0.0295134	0.16035	0.130407	PRNP/DLG5/LGALS9B/CBLB/IL20RB/LGALS9C/BMP4/TNFRSF21/TYROBP/SPN/HAVCR2	11	Basal-cell
GO:0051222	positive regulation of protein transport	29/1229	308/18870	0.0295205	0.16035	0.130407	FLNA/PRNP/WLS/ACSL4/SMAD3/TGFB1/BAP1/CHP2/GAS6/ANO1/RUFY3/EXPH5/ARHGEF5/SORL1/HIF1A/TREM2/NNAT/HCLS1/EFCAB7/SYBU/KIF20B/CDK1/SREBF2/OR51E2/PRKCB/XPO4/CHP1/MIEF1/FYN	29	Basal-cell
GO:0050727	regulation of inflammatory response	38/1229	425/18870	0.0295929	0.160585	0.130598	KRT1/GPX1/MIR205/APOE/SMAD3/APP/TGFB1/BAP1/TNC/GSDMD/IL20RB/LPCAT3/OSMR/NR1D1/CX3CL1/PTPRC/METRNL/PLA2G7/LGALS1/TREM2/ADORA2B/IL20/EDNRB/SAA1/IL33/LPL/PBK/IL16/TNFAIP8L2/AHR/GPSM3/NT5E/PIK3CG/DUOXA1/SPN/ALOX5AP/DNASE1L3/FYN	38	Basal-cell
GO:0001659	temperature homeostasis	19/1229	183/18870	0.0298498	0.161819	0.131602	PDGFC/GPX1/NMU/ADIPOR1/SLC27A1/EPAS1/NR1D1/SCD/GATM/EDN2/ACSL1/EDNRB/TRPV2/FABP5/LAMA4/CD36/ADAMTS5/ELOVL6/ESRRG	19	Basal-cell
GO:0008016	regulation of heart contraction	21/1229	208/18870	0.030502	0.16277	0.132376	FLNA/MEF2A/DSP/KCNJ2/EDN1/HOPX/EPAS1/ATP2B1/SCN4B/EDNRA/EDN2/DSG2/BIN1/EDNRB/DMD/PKP2/KCNE4/CALM3/KCNN2/UCN/PIK3CG	21	Basal-cell
GO:0061005	cell differentiation involved in kidney development	8/1229	57/18870	0.0305088	0.16277	0.132376	HES1/WNT4/GDNF/EDNRA/MEF2C/EDNRB/NOTCH2/WNT9B	8	Basal-cell
GO:0072132	mesenchyme morphogenesis	8/1229	57/18870	0.0305088	0.16277	0.132376	SNAI2/WNT3A/SMAD3/BMP2/HEY1/BMPR1A/ADAMTS5/SOX9	8	Basal-cell
GO:0061458	reproductive system development	29/1229	309/18870	0.0306311	0.16277	0.132376	FLNA/TP63/FGFR2/PLEKHA1/LFNG/WNT7A/WNT4/ALOX15B/TNC/SERPINF1/CSDE1/HOXA9/NHLH2/KITLG/RHOBTB3/ROR2/DHCR24/BMP4/ADAMTS1/KIT/MMP2/LRP2/SCX/FST/SOX9/ZFPM2/WNT9B/PSAP/FZD4	29	Basal-cell
GO:0010172	embryonic body morphogenesis	3/1229	11/18870	0.0306471	0.16277	0.132376	PHLDB1/PHLDB2/CDON	3	Basal-cell
GO:0010887	negative regulation of cholesterol storage	3/1229	11/18870	0.0306471	0.16277	0.132376	ABCA1/TREM2/CES1	3	Basal-cell
GO:0015808	L-alanine transport	3/1229	11/18870	0.0306471	0.16277	0.132376	SLC38A5/SLC1A4/SLC38A4	3	Basal-cell
GO:0031943	regulation of glucocorticoid metabolic process	3/1229	11/18870	0.0306471	0.16277	0.132376	DKK3/WNT4/BMP2	3	Basal-cell
GO:0031953	negative regulation of protein autophosphorylation	3/1229	11/18870	0.0306471	0.16277	0.132376	ERRFI1/PTPRC/CHP1	3	Basal-cell
GO:0032060	bleb assembly	3/1229	11/18870	0.0306471	0.16277	0.132376	PMP22/EMP2/ANLN	3	Basal-cell
GO:0042045	epithelial fluid transport	3/1229	11/18870	0.0306471	0.16277	0.132376	EDN1/EDNRB/SLC26A6	3	Basal-cell
GO:0051256	mitotic spindle midzone assembly	3/1229	11/18870	0.0306471	0.16277	0.132376	KIF23/CDCA8/PRC1	3	Basal-cell
GO:0060736	prostate gland growth	3/1229	11/18870	0.0306471	0.16277	0.132376	FGFR2/SOX9/PSAP	3	Basal-cell
GO:0060742	epithelial cell differentiation involved in prostate gland development	3/1229	11/18870	0.0306471	0.16277	0.132376	TP63/FGFR2/PSAP	3	Basal-cell
GO:0061314	Notch signaling involved in heart development	3/1229	11/18870	0.0306471	0.16277	0.132376	SNAI2/NOTCH2/HEY1	3	Basal-cell
GO:0071492	cellular response to UV-A	3/1229	11/18870	0.0306471	0.16277	0.132376	TIMP1/MMP2/CERS1	3	Basal-cell
GO:0071895	odontoblast differentiation	3/1229	11/18870	0.0306471	0.16277	0.132376	TGFB1/MAP1B/DLX3	3	Basal-cell
GO:0072178	nephric duct morphogenesis	3/1229	11/18870	0.0306471	0.16277	0.132376	GPC3/BMP4/WNT9B	3	Basal-cell
GO:0086100	endothelin receptor signaling pathway	3/1229	11/18870	0.0306471	0.16277	0.132376	EDN1/EDNRA/EDNRB	3	Basal-cell
GO:0110011	regulation of basement membrane organization	3/1229	11/18870	0.0306471	0.16277	0.132376	PHLDB1/PHLDB2/LAMC1	3	Basal-cell
GO:2000343	positive regulation of chemokine (C-X-C motif) ligand 2 production	3/1229	11/18870	0.0306471	0.16277	0.132376	POSTN/TGFB1/LPL	3	Basal-cell
GO:0003161	cardiac conduction system development	6/1229	37/18870	0.0309045	0.163035	0.132591	HOPX/DSG2/BMP4/NOTCH2/HEY1/BMPR1A	6	Basal-cell
GO:0010934	macrophage cytokine production	6/1229	37/18870	0.0309045	0.163035	0.132591	TGFB1/SPON2/PRG2/CD36/PANX1/CARD9	6	Basal-cell
GO:0010935	regulation of macrophage cytokine production	6/1229	37/18870	0.0309045	0.163035	0.132591	TGFB1/SPON2/PRG2/CD36/PANX1/CARD9	6	Basal-cell
GO:0014059	regulation of dopamine secretion	6/1229	37/18870	0.0309045	0.163035	0.132591	SYT8/GDNF/SYT17/SYT7/SNCG/PRKCB	6	Basal-cell
GO:0045773	positive regulation of axon extension	6/1229	37/18870	0.0309045	0.163035	0.132591	RUFY3/MAP1B/TRPV2/L1CAM/MAPT/FN1	6	Basal-cell
GO:0046688	response to copper ion	6/1229	37/18870	0.0309045	0.163035	0.132591	PRNP/MT2A/MT1E/SOD3/MT1G/CDK1	6	Basal-cell
GO:0060323	head morphogenesis	6/1229	37/18870	0.0309045	0.163035	0.132591	WNT3/PLEKHA1/RRAS/MMP2/SCX/CRISPLD1	6	Basal-cell
GO:0038127	ERBB signaling pathway	14/1229	124/18870	0.031021	0.163492	0.132963	CDH13/EFEMP1/NRG1/TGFB1/CBLB/ERRFI1/AREG/ERBB3/FAM83C/SHC1/IFI6/REPS2/SOX9/NRG4	14	Basal-cell
GO:0051353	positive regulation of oxidoreductase activity	7/1229	47/18870	0.0313077	0.164101	0.133458	APOE/EDN1/VDR/GDNF/EDN2/HIF1A/RFK	7	Basal-cell
GO:0061383	trabecula morphogenesis	7/1229	47/18870	0.0313077	0.164101	0.133458	NRG1/FHL2/SLC40A1/ADAMTS1/MMP2/HEY1/BMPR1A	7	Basal-cell
GO:0034219	carbohydrate transmembrane transport	15/1229	136/18870	0.0314969	0.164101	0.133458	SLC2A1/MEF2A/SLC2A5/EDN1/SLC27A1/GPC3/EDNRA/CLTCL1/SORT1/SLC45A3/FABP5/SLC1A2/SLC27A4/SLC26A6/PRKCB	15	Basal-cell
GO:0002281	macrophage activation involved in immune response	4/1229	19/18870	0.031616	0.164101	0.133458	TREM2/IL33/TYROBP/HAVCR2	4	Basal-cell
GO:0002283	neutrophil activation involved in immune response	4/1229	19/18870	0.031616	0.164101	0.133458	ANXA3/PTAFR/TYROBP/DNASE1L3	4	Basal-cell
GO:0003184	pulmonary valve morphogenesis	4/1229	19/18870	0.031616	0.164101	0.133458	BMP4/NOTCH2/HEY1/ADAMTS5	4	Basal-cell
GO:0010801	negative regulation of peptidyl-threonine phosphorylation	4/1229	19/18870	0.031616	0.164101	0.133458	SPRED2/SPRED1/DMTN/CALM3	4	Basal-cell
GO:0030206	chondroitin sulfate biosynthetic process	4/1229	19/18870	0.031616	0.164101	0.133458	XYLT2/UGDH/CHST15/DSE	4	Basal-cell
GO:0035338	long-chain fatty-acyl-CoA biosynthetic process	4/1229	19/18870	0.031616	0.164101	0.133458	ACSL4/ACSL1/HACD2/ELOVL6	4	Basal-cell
GO:0051797	regulation of hair follicle development	4/1229	19/18870	0.031616	0.164101	0.133458	FOXN1/FERMT1/NGFR/FST	4	Basal-cell
GO:0060716	labyrinthine layer blood vessel development	4/1229	19/18870	0.031616	0.164101	0.133458	HES1/PLCD3/HEY1/HS6ST1	4	Basal-cell
GO:0097320	plasma membrane tubulation	4/1229	19/18870	0.031616	0.164101	0.133458	EHD2/SNX33/ATP10A/BIN2	4	Basal-cell
GO:1902307	positive regulation of sodium ion transmembrane transport	4/1229	19/18870	0.031616	0.164101	0.133458	ATP1B3/CHP2/DMD/CHP1	4	Basal-cell
GO:0042490	mechanoreceptor differentiation	9/1229	68/18870	0.031644	0.164101	0.133458	JAG2/DLL1/TSKU/HES1/NTRK2/NTF4/SLITRK6/BMP4/STRC	9	Basal-cell
GO:0042987	amyloid precursor protein catabolic process	9/1229	68/18870	0.031644	0.164101	0.133458	PRNP/APOE/NTRK2/IFNGR1/PSEN2/DHCR24/SORL1/BIN1/RTN1	9	Basal-cell
GO:0150116	regulation of cell-substrate junction organization	9/1229	68/18870	0.031644	0.164101	0.133458	COL16A1/SMAD3/WNT4/PHLDB2/THBS1/DLC1/APOD/DMTN/FMN1	9	Basal-cell
GO:2000379	positive regulation of reactive oxygen species metabolic process	9/1229	68/18870	0.031644	0.164101	0.133458	CBR1/TGFB1/THBS1/CDKN1A/RAB27A/CD36/TYROBP/DUOXA1/MAPT	9	Basal-cell
GO:0030071	regulation of mitotic metaphase/anaphase transition	11/1229	90/18870	0.0317218	0.16435	0.13366	SMARCD3/BCL7A/TTK/CDC20/SPC25/NUF2/NDC80/CDCA8/SPC24/UBE2C/BUB1B	11	Basal-cell
GO:0072593	reactive oxygen species metabolic process	23/1229	234/18870	0.0320211	0.165744	0.134794	SH3PXD2A/GPX1/CBR1/TGFB1/EDN1/PMAIP1/THBS1/CDKN1A/HIF1A/PREX1/RAB27A/PLA2R1/SOD3/IFI6/FOXM1/CD36/TYROBP/DUOXA1/TPO/MAPT/RFK/FYN/BRCA1	23	Basal-cell
GO:0009314	response to radiation	38/1229	428/18870	0.0324757	0.167939	0.136579	CCND2/ITGB1/GPX1/SNAI2/TIMP1/SLC1A3/APP/XPC/PTPRK/DDB2/GNAQ/GRIN2A/PIAS1/TUBA1A/BEST1/CACNB4/CDKN1A/NET1/PTPRC/PDE1B/HIF1A/PER3/MC1R/DCT/KIT/CRY2/TYR/CCND1/SLC1A2/MMP2/PBK/HMGCR/HRH1/BLM/CERS1/MEIS2/TRPM1/BRCA1	38	Basal-cell
GO:0010922	positive regulation of phosphatase activity	5/1229	28/18870	0.0326332	0.168121	0.136727	CHP2/BMP2/PTPRC/MEF2C/CALM3	5	Basal-cell
GO:0042634	regulation of hair cycle	5/1229	28/18870	0.0326332	0.168121	0.136727	TSKU/FOXN1/FERMT1/NGFR/FST	5	Basal-cell
GO:0048668	collateral sprouting	5/1229	28/18870	0.0326332	0.168121	0.136727	WNT3/WNT3A/APP/RGMA/CRABP2	5	Basal-cell
GO:1903901	negative regulation of viral life cycle	5/1229	28/18870	0.0326332	0.168121	0.136727	IFITM3/LY6E/IFITM1/IFITM2/GSN	5	Basal-cell
GO:0002698	negative regulation of immune effector process	14/1229	125/18870	0.0329244	0.169303	0.137689	ASCL2/TGFB1/IL20RB/SERPING1/PRG2/PTPRC/PGLYRP3/IL33/PARP3/LGALS3/CLEC12B/AHR/SPN/HAVCR2	14	Basal-cell
GO:0006690	icosanoid metabolic process	14/1229	125/18870	0.0329244	0.169303	0.137689	GPX1/PTGS1/CBR1/ALOX15B/EDN1/CYP2S1/GSTM1/EDN2/HPGD/GGT6/CYP2U1/FADS1/FABP5/ALOX5AP	14	Basal-cell
GO:0010639	negative regulation of organelle organization	33/1229	363/18870	0.0331289	0.170196	0.138415	LIMA1/GPX1/MET/ARAP1/PHLDB2/LIMK2/SPTBN2/VAT1/TMEM67/MAP1B/TOM1L2/TOP2A/BMP4/DLC1/TJP1/TMOD1/TUBB4A/TTK/CDC20/SPC25/NUF2/NDC80/CDCA8/DMTN/SPC24/KAT2B/BUB1B/SCIN/GSN/ACAA2/MAPT/ACD/BRCA1	33	Basal-cell
GO:0043266	regulation of potassium ion transport	12/1229	102/18870	0.0332467	0.170642	0.138777	FLNA/ATP1B3/ITGB1/PRNP/KCNJ2/FHL1/KCNS1/TREM2/BIN1/GNB2/KCNE4/KCNN2	12	Basal-cell
GO:0002707	negative regulation of lymphocyte mediated immunity	8/1229	58/18870	0.0334466	0.171188	0.139221	TGFB1/IL20RB/PTPRC/PARP3/CLEC12B/AHR/SPN/HAVCR2	8	Basal-cell
GO:0048008	platelet-derived growth factor receptor signaling pathway	8/1229	58/18870	0.0334466	0.171188	0.139221	PDGFA/PDGFC/PLEKHA1/TXNIP/CBLB/APOD/PTPN1/STON1	8	Basal-cell
GO:0110053	regulation of actin filament organization	26/1229	273/18870	0.0334662	0.171188	0.139221	FLNA/LIMA1/SMAD3/WNT4/MET/SYNPO2/ARAP1/PHLDB2/SPTBN2/ARHGEF10/CDC42EP4/ARHGEF5/CX3CL1/PREX1/DLC1/TJP1/BIN1/EVL/BAG4/TMOD1/ARHGEF10L/HCLS1/DMTN/SCIN/GSN/FMN1	26	Basal-cell
GO:0050768	negative regulation of neurogenesis	16/1229	149/18870	0.0334777	0.171188	0.139221	WNT3/ASCL2/WNT3A/WNT7A/HES1/PPP3CA/RGMA/NR1D1/TMEM98/RUFY3/SORL1/TREM2/SOX10/BRINP1/ARHGAP4/BMPR1A	16	Basal-cell
GO:0097581	lamellipodium organization	11/1229	91/18870	0.0340452	0.173928	0.14145	CDH13/ITGB1/PDPN/AJUBA/AUTS2/VAV2/ENPP2/KIT/DMTN/ARHGEF6/SRGAP2	11	Basal-cell
GO:0032835	glomerulus development	9/1229	69/18870	0.0343701	0.175401	0.142648	NOTCH3/HES1/PPP3CA/SERPINB7/EDNRA/BMP4/MEF2C/EDNRB/NOTCH2	9	Basal-cell
GO:0005996	monosaccharide metabolic process	25/1229	261/18870	0.034414	0.175401	0.142648	SLC2A1/PKM/SLC39A14/GALT/ADIPOR1/CHST15/DSE/PMAIP1/GALK1/PGM1/UXS1/LRP5/IGFBP3/SLC45A3/PGM2/FABP5/APOD/INPPL1/GAPDHS/MAN2A2/ENO2/KAT2B/TFF3/SERPINA12/GNMT	25	Basal-cell
GO:0006941	striated muscle contraction	19/1229	186/18870	0.0344741	0.175401	0.142648	FLNA/TNNT1/DSP/KCNJ2/TNNI2/MYH14/SCN4B/TNNT3/DSG2/BIN1/DMD/PKP2/SGCD/KCNE4/CALM3/GSN/KCNN2/UCN/PIK3CG	19	Basal-cell
GO:0030195	negative regulation of blood coagulation	7/1229	48/18870	0.034669	0.175401	0.142648	KRT1/PDGFA/APOE/EDN1/PROS1/SERPING1/THBS1	7	Basal-cell
GO:0046580	negative regulation of Ras protein signal transduction	7/1229	48/18870	0.034669	0.175401	0.142648	ITGA3/ITGB1/MET/SPRY1/DLC1/KCTD10/STMN3	7	Basal-cell
GO:0097720	calcineurin-mediated signaling	7/1229	48/18870	0.034669	0.175401	0.142648	PRNP/FHL2/CHP2/PPP3CA/ERBB3/NFATC2/CHP1	7	Basal-cell
GO:1902003	regulation of amyloid-beta formation	7/1229	48/18870	0.034669	0.175401	0.142648	PRNP/APOE/NTRK2/IFNGR1/SORL1/BIN1/RTN1	7	Basal-cell
GO:0003180	aortic valve morphogenesis	6/1229	38/18870	0.0347484	0.175401	0.142648	SNAI2/TGFB1/BMP4/HEY1/ADAMTS5/SOX9	6	Basal-cell
GO:0032373	positive regulation of sterol transport	6/1229	38/18870	0.0347484	0.175401	0.142648	APOE/ABCA1/LPCAT3/ABCA8/TREM2/CES1	6	Basal-cell
GO:0032376	positive regulation of cholesterol transport	6/1229	38/18870	0.0347484	0.175401	0.142648	APOE/ABCA1/LPCAT3/ABCA8/TREM2/CES1	6	Basal-cell
GO:0035633	maintenance of blood-brain barrier	6/1229	38/18870	0.0347484	0.175401	0.142648	ITGB1/LAMC1/ZEB2/TJP1/CLDN1/DMD	6	Basal-cell
GO:0040036	regulation of fibroblast growth factor receptor signaling pathway	6/1229	38/18870	0.0347484	0.175401	0.142648	SMOC2/NPTN/WNT4/SPRY1/NGFR/THBS1	6	Basal-cell
GO:0043516	regulation of DNA damage response, signal transduction by p53 class mediator	6/1229	38/18870	0.0347484	0.175401	0.142648	SNAI2/SPRED2/PMAIP1/SPRED1/PLA2R1/DYRK3	6	Basal-cell
GO:0021915	neural tube development	17/1229	162/18870	0.0351745	0.177389	0.144265	WNT3A/HES1/TGFB1/PTK7/CELSR1/ST14/GRHL3/RGMA/IFT172/HIF1A/BMP4/FZD6/PLOD3/DLC1/GLI2/LRP2/KIF20B	17	Basal-cell
GO:0007098	centrosome cycle	15/1229	138/18870	0.0352321	0.177517	0.144368	ARHGEF10/TMEM67/TUBA1A/CCDC57/HAUS6/SLC16A1/NDC80/CEP72/WDR62/KAT2B/KIF25/CDK1/PLK4/PKHD1/BRCA1	15	Basal-cell
GO:0070588	calcium ion transmembrane transport	32/1229	352/18870	0.0354634	0.178499	0.145167	FLNA/PRNP/WNT3A/PPP3CA/EDN1/ORAI3/GAS6/ATP2B1/PSEN2/GRIN2A/EDNRA/JPH2/BDKRB1/CACNB4/CX3CL1/PTPRC/SLC24A5/BIN1/EDNRB/TRPV2/DMD/CAPN3/CALM3/PANX1/ANXA6/PLP1/PIK3CG/TRPM1/MICU3/SLC24A3/FYN/ANXA9	32	Basal-cell
GO:0045639	positive regulation of myeloid cell differentiation	12/1229	103/18870	0.0354919	0.178499	0.145167	TGFB1/PPP3CA/IL34/KITLG/ROR2/HIF1A/TREM2/IL20/NOTCH2/HCLS1/SCIN/TYROBP	12	Basal-cell
GO:0060828	regulation of canonical Wnt signaling pathway	25/1229	262/18870	0.0357874	0.17982	0.146242	DKK3/FGFR2/WLS/SNAI2/WNT3A/APOE/SMAD3/TGFB1/PTK7/GPC3/TPBG/FERMT1/GNAQ/BMP2/SOX7/NRARP/LGR6/ZEB2/FZD6/SOX10/IGFBP6/SCEL/SOSTDC1/SOX9/HHEX	25	Basal-cell
GO:0030516	regulation of axon extension	11/1229	92/18870	0.0364862	0.182754	0.148628	WNT3/WNT3A/APOE/TTL/RUFY3/MAP1B/TRPV2/L1CAM/ARHGAP4/MAPT/FN1	11	Basal-cell
GO:1903510	mucopolysaccharide metabolic process	11/1229	92/18870	0.0364862	0.182754	0.148628	XYLT2/TGFB1/UGDH/CHST15/DSE/EDNRA/ITIH5/EXT2/HMMR/EDNRB/LYVE1	11	Basal-cell
GO:0002366	leukocyte activation involved in immune response	28/1229	301/18870	0.0365594	0.182754	0.148628	DLL1/ASCL2/LFNG/TGFB1/ANXA3/TMEM98/PTPRC/PGLYRP3/LGALS1/TREM2/RAB27A/ADORA2B/KIT/NOTCH2/PTAFR/IL33/HLA-DRA/PARP3/LGALS3/MYB/BATF/TYROBP/PIK3CG/SPN/FCER1A/EXO1/DNASE1L3/HAVCR2	28	Basal-cell
GO:1902074	response to salt	33/1229	366/18870	0.0365655	0.182754	0.148628	COL18A1/ITGA2/MEF2A/SYT8/ASPN/SLC1A3/TXNIP/CHP2/PPP3CA/EDN1/GNAQ/ANKH/THBS1/CPNE8/EDNRA/TUBA1A/SLC6A1/MEF2C/EDNRB/SYT17/CLDN1/SLC1A2/DMTN/CAPN3/CALM3/CD36/SYT7/PANX1/NFATC2/NT5E/PRKCB/ALOX5AP/FYN	33	Basal-cell
GO:0002823	negative regulation of adaptive immune response based on somatic recombination of immune receptors built from immunoglobulin superfamily domains	8/1229	59/18870	0.0365708	0.182754	0.148628	ASCL2/IL20RB/PTPRC/IL33/PARP3/AHR/SPN/HAVCR2	8	Basal-cell
GO:0098900	regulation of action potential	8/1229	59/18870	0.0365708	0.182754	0.148628	FLNA/DSP/KCNJ2/DSG2/BIN1/PKP2/CALM3/CD36	8	Basal-cell
GO:0043524	negative regulation of neuron apoptotic process	17/1229	163/18870	0.0369869	0.184587	0.150119	APOE/CCL2/NTRK2/NTF4/GDNF/CHL1/PLXND1/CX3CL1/HIF1A/MEF2C/ERBB3/CPEB4/CCND1/GRIK2/NTF3/KIF14/UCN	17	Basal-cell
GO:0048644	muscle organ morphogenesis	10/1229	81/18870	0.0371343	0.184587	0.150119	FGFR2/NRG1/DSP/TGFB1/BMP2/EDNRA/PKP2/LRP2/BMPR1A/ZFPM2	10	Basal-cell
GO:0071248	cellular response to metal ion	20/1229	200/18870	0.0371722	0.184587	0.150119	PRNP/MEF2A/SYT8/CHP2/SERPINF1/MT2A/EDN1/SLC40A1/MT1E/CPNE8/TUBA1A/MEF2C/SYT17/CLDN1/DMTN/CAPN3/MT1G/SYT7/NFATC2/ALOX5AP	20	Basal-cell
GO:0010971	positive regulation of G2/M transition of mitotic cell cycle	5/1229	29/18870	0.0373884	0.184587	0.150119	HSPA2/APP/SMARCD3/CCND1/CDK1	5	Basal-cell
GO:0060037	pharyngeal system development	5/1229	29/18870	0.0373884	0.184587	0.150119	HES1/EDN1/EDNRA/BMP4/BMPR1A	5	Basal-cell
GO:0098901	regulation of cardiac muscle cell action potential	5/1229	29/18870	0.0373884	0.184587	0.150119	DSP/DSG2/BIN1/PKP2/CALM3	5	Basal-cell
GO:0002396	MHC protein complex assembly	4/1229	20/18870	0.037542	0.184587	0.150119	TAPBP/HLA-DPA1/HLA-DPB1/HLA-DRA	4	Basal-cell
GO:0002501	peptide antigen assembly with MHC protein complex	4/1229	20/18870	0.037542	0.184587	0.150119	TAPBP/HLA-DPA1/HLA-DPB1/HLA-DRA	4	Basal-cell
GO:0006700	C21-steroid hormone biosynthetic process	4/1229	20/18870	0.037542	0.184587	0.150119	DKK3/WNT4/BMP2/CLCN2	4	Basal-cell
GO:0043691	reverse cholesterol transport	4/1229	20/18870	0.037542	0.184587	0.150119	LCAT/APOE/ABCA1/CES1	4	Basal-cell
GO:0048643	positive regulation of skeletal muscle tissue development	4/1229	20/18870	0.037542	0.184587	0.150119	DLL1/WNT3A/CDON/MEF2C	4	Basal-cell
GO:0051767	nitric-oxide synthase biosynthetic process	4/1229	20/18870	0.037542	0.184587	0.150119	CCL2/EDN1/AKAP12/IL33	4	Basal-cell
GO:0051769	regulation of nitric-oxide synthase biosynthetic process	4/1229	20/18870	0.037542	0.184587	0.150119	CCL2/EDN1/AKAP12/IL33	4	Basal-cell
GO:0055093	response to hyperoxia	4/1229	20/18870	0.037542	0.184587	0.150119	PDPN/SLC7A5/CDKN1A/MMP2	4	Basal-cell
GO:0097709	connective tissue replacement	4/1229	20/18870	0.037542	0.184587	0.150119	TIMP1/TGFB1/PPP3CA/HIF1A	4	Basal-cell
GO:1900221	regulation of amyloid-beta clearance	4/1229	20/18870	0.037542	0.184587	0.150119	APOE/IFNGR1/TREM2/HMGCR	4	Basal-cell
GO:1900424	regulation of defense response to bacterium	4/1229	20/18870	0.037542	0.184587	0.150119	KLK5/MAPKBP1/MMRN2/HAVCR2	4	Basal-cell
GO:1903978	regulation of microglial cell activation	4/1229	20/18870	0.037542	0.184587	0.150119	NR1D1/CX3CL1/PTPRC/TREM2	4	Basal-cell
GO:0002696	positive regulation of leukocyte activation	34/1229	380/18870	0.0376075	0.184744	0.150246	SOX12/WNT3A/CCL2/SLC7A1/HES1/TGFB1/EFNB1/PPP3CA/CD276/SMARCD3/GAS6/RUNX3/THBS1/KITLG/CDKN1A/PTPRC/VNN1/MEF2C/LGALS1/TREM2/ADORA2B/GLI2/HLA-DPA1/PTAFR/IL33/HLA-DPB1/HLA-DRA/PIK3R6/NFATC2/TYROBP/CD83/SPN/FYN/HAVCR2	34	Basal-cell
GO:1901342	regulation of vasculature development	32/1229	354/18870	0.0378919	0.185975	0.151247	THBS2/DLL1/SMOC2/KRT1/ITGB1/ERAP1/PKM/DCN/MIR205/CCM2/GLUL/WNT4/SERPINF1/ITGB8/ANXA3/EMP2/RRAS/THBS1/SPRED1/PTPRM/PLXND1/ANGPTL4/HIF1A/TJP1/ADAMTS1/LRG1/ISM1/PIK3R6/PRKCB/PIK3CG/HHEX/BRCA1	32	Basal-cell
GO:0002673	regulation of acute inflammatory response	7/1229	49/18870	0.0382612	0.186885	0.151987	IL20RB/OSMR/EDNRB/PIK3CG/SPN/ALOX5AP/DNASE1L3	7	Basal-cell
GO:0008608	attachment of spindle microtubules to kinetochore	7/1229	49/18870	0.0382612	0.186885	0.151987	SPC25/NUF2/NDC80/CDCA8/SPC24/KAT2B/SPAG5	7	Basal-cell
GO:0048286	lung alveolus development	7/1229	49/18870	0.0382612	0.186885	0.151987	FGFR2/PDGFA/HOPX/EDN2/ERRFI1/BMP4/HS6ST1	7	Basal-cell
GO:1900047	negative regulation of hemostasis	7/1229	49/18870	0.0382612	0.186885	0.151987	KRT1/PDGFA/APOE/EDN1/PROS1/SERPING1/THBS1	7	Basal-cell
GO:0032350	regulation of hormone metabolic process	6/1229	39/18870	0.0388872	0.186885	0.151987	DKK3/WNT4/BMP2/HIF1A/CLCN2/DUOXA1	6	Basal-cell
GO:0032438	melanosome organization	6/1229	39/18870	0.0388872	0.186885	0.151987	APOE/ZEB2/PMEL/GPR143/TYRP1/KIF13A	6	Basal-cell
GO:0045746	negative regulation of Notch signaling pathway	6/1229	39/18870	0.0388872	0.186885	0.151987	DLL1/DLK2/LFNG/NRARP/HEY1/TSPAN15	6	Basal-cell
GO:0071548	response to dexamethasone	6/1229	39/18870	0.0388872	0.186885	0.151987	ASS1/SERPINF1/EDN1/FIBIN/CLDN1/PTAFR	6	Basal-cell
GO:0097242	amyloid-beta clearance	6/1229	39/18870	0.0388872	0.186885	0.151987	APOE/IFNGR1/TREM2/HMGCR/LRP2/CD36	6	Basal-cell
GO:0000022	mitotic spindle elongation	3/1229	12/18870	0.0389272	0.186885	0.151987	KIF23/CDCA8/PRC1	3	Basal-cell
GO:0000101	sulfur amino acid transport	3/1229	12/18870	0.0389272	0.186885	0.151987	SLC7A5/SLC1A4/SLC1A2	3	Basal-cell
GO:0001553	luteinization	3/1229	12/18870	0.0389272	0.186885	0.151987	PLEKHA1/MMP2/FZD4	3	Basal-cell
GO:0006068	ethanol catabolic process	3/1229	12/18870	0.0389272	0.186885	0.151987	ALDH3B2/ALDH3B1/SULT1E1	3	Basal-cell
GO:0010826	negative regulation of centrosome duplication	3/1229	12/18870	0.0389272	0.186885	0.151987	TMEM67/KAT2B/BRCA1	3	Basal-cell
GO:0014004	microglia differentiation	3/1229	12/18870	0.0389272	0.186885	0.151987	APP/TGFB1/TSPAN2	3	Basal-cell
GO:0015801	aromatic amino acid transport	3/1229	12/18870	0.0389272	0.186885	0.151987	SLC38A5/SLC7A1/SLC7A5	3	Basal-cell
GO:0030948	negative regulation of vascular endothelial growth factor receptor signaling pathway	3/1229	12/18870	0.0389272	0.186885	0.151987	PTPN1/HHEX/MMRN2	3	Basal-cell
GO:0032351	negative regulation of hormone metabolic process	3/1229	12/18870	0.0389272	0.186885	0.151987	DKK3/WNT4/BMP2	3	Basal-cell
GO:0034370	triglyceride-rich lipoprotein particle remodeling	3/1229	12/18870	0.0389272	0.186885	0.151987	LCAT/APOE/LPL	3	Basal-cell
GO:0034372	very-low-density lipoprotein particle remodeling	3/1229	12/18870	0.0389272	0.186885	0.151987	LCAT/APOE/LPL	3	Basal-cell
GO:0034650	cortisol metabolic process	3/1229	12/18870	0.0389272	0.186885	0.151987	DKK3/WNT4/BMP2	3	Basal-cell
GO:0046606	negative regulation of centrosome cycle	3/1229	12/18870	0.0389272	0.186885	0.151987	TMEM67/KAT2B/BRCA1	3	Basal-cell
GO:0070857	regulation of bile acid biosynthetic process	3/1229	12/18870	0.0389272	0.186885	0.151987	NR1D1/STAR/CES1	3	Basal-cell
GO:1904953	Wnt signaling pathway involved in midbrain dopaminergic neuron differentiation	3/1229	12/18870	0.0389272	0.186885	0.151987	WNT3/WNT3A/WNT9B	3	Basal-cell
GO:2000562	negative regulation of CD4-positive, alpha-beta T cell proliferation	3/1229	12/18870	0.0389272	0.186885	0.151987	LGALS9B/CBLB/LGALS9C	3	Basal-cell
GO:1902099	regulation of metaphase/anaphase transition of cell cycle	11/1229	93/18870	0.0390472	0.187297	0.152322	SMARCD3/BCL7A/TTK/CDC20/SPC25/NUF2/NDC80/CDCA8/SPC24/UBE2C/BUB1B	11	Basal-cell
GO:0000086	G2/M transition of mitotic cell cycle	15/1229	140/18870	0.039278	0.188076	0.152956	HSPA2/RBBP8/APP/FHL1/SMARCD3/BACH1/CDKN1A/CCDC57/CCND1/BLM/CALM3/FOXM1/CDK1/KIF14/BRCA1	15	Basal-cell
GO:0008360	regulation of cell shape	15/1229	140/18870	0.039278	0.188076	0.152956	PDPN/CCL2/ARAP1/MYH14/PLXNC1/FMNL2/CDC42EP4/PLXND1/DLC1/KIT/ATP10A/DMTN/FGD2/FN1/FYN	15	Basal-cell
GO:0140694	non-membrane-bounded organelle assembly	36/1229	408/18870	0.0395213	0.189076	0.153769	FLNA/ITGB1/MEF2A/TNNT1/MYL9/GPSM2/MYOM2/CSDE1/EDN1/ARHGEF10/NEBL/TNNT3/ARHGEF5/CCDC57/HAUS6/TMOD1/KIF23/ANLN/CDC20/KIFC2/NDC80/CDCA8/CEP72/WDR62/CAPN3/KAT2B/KIFC1/GSN/SPAG5/CENPA/PLK4/BIN2/MAPT/MYBL2/PRC1/BRCA1	36	Basal-cell
GO:0048167	regulation of synaptic plasticity	21/1229	214/18870	0.0397041	0.189786	0.154346	PRNP/NSG1/APOE/NPTN/APP/NTRK2/GRIN2A/MAP1B/CX3CL1/MEF2C/S100B/KIT/CDC20/CALB2/GRIK2/HMGCR/HRH1/SYT7/TYROBP/CAMK2B/MAPT	21	Basal-cell
GO:0007566	embryo implantation	8/1229	60/18870	0.0398855	0.190352	0.154807	ITGB4/TIMP1/DDR1/EMP2/TPPP3/MMP2/ARHGDIB/IGFBP7	8	Basal-cell
GO:0000079	regulation of cyclin-dependent protein serine/threonine kinase activity	10/1229	82/18870	0.0399265	0.190352	0.154807	CCND2/CDKN1A/CCNG2/PSRC1/CCND1/CDKN3/BLM/CDKN2C/HHEX/MIR711	10	Basal-cell
GO:0140115	export across plasma membrane	10/1229	82/18870	0.0399265	0.190352	0.154807	ATP1B3/SLC38A5/ABCA1/SLC47A2/SLC27A1/SLC40A1/ATP2B1/SLC47A1/KCNE4/CALM3	10	Basal-cell
GO:0032635	interleukin-6 production	18/1229	177/18870	0.040268	0.191459	0.155707	APP/TGFB1/SPON2/GAS6/IL1RAP/CX3CL1/TREM2/ADORA2B/PTAFR/IL33/ARID5A/LPL/IL16/CD36/CARD9/UCN/TYROBP/HAVCR2	18	Basal-cell
GO:0032675	regulation of interleukin-6 production	18/1229	177/18870	0.040268	0.191459	0.155707	APP/TGFB1/SPON2/GAS6/IL1RAP/CX3CL1/TREM2/ADORA2B/PTAFR/IL33/ARID5A/LPL/IL16/CD36/CARD9/UCN/TYROBP/HAVCR2	18	Basal-cell
GO:0060420	regulation of heart growth	9/1229	71/18870	0.040298	0.191459	0.155707	FGFR2/TP73/EDN1/DUSP6/MEF2C/BMPR1A/CDK1/ZFPM2/MIR25	9	Basal-cell
GO:0090307	mitotic spindle assembly	9/1229	71/18870	0.040298	0.191459	0.155707	FLNA/ARHGEF10/KIF23/CDC20/KIFC2/CDCA8/KIFC1/MYBL2/PRC1	9	Basal-cell
GO:0050728	negative regulation of inflammatory response	20/1229	202/18870	0.0406013	0.192734	0.156744	KRT1/GPX1/MIR205/APOE/SMAD3/IL20RB/LPCAT3/NR1D1/CX3CL1/PTPRC/METRNL/TREM2/SAA1/IL33/PBK/TNFAIP8L2/AHR/NT5E/SPN/FYN	20	Basal-cell
GO:0062197	cellular response to chemical stress	29/1229	317/18870	0.0407009	0.193039	0.156992	SLC2A1/GPX1/ALDH3B1/PLEKHA1/MET/EDN1/ETV5/BDKRB2/SERPINB6/PTPRK/EPAS1/LRRC8D/EDNRA/WNT16/NET1/CPEB2/HIF1A/GPX8/PLA2R1/SOD3/MMP2/CAPN3/KAT2B/MYB/CD36/CDK1/NCOA7/MAPT/FYN	29	Basal-cell
GO:1904659	glucose transmembrane transport	13/1229	117/18870	0.0410431	0.194495	0.158176	SLC2A1/MEF2A/SLC2A5/EDN1/SLC27A1/GPC3/EDNRA/CLTCL1/SORT1/FABP5/SLC1A2/SLC27A4/PRKCB	13	Basal-cell
GO:0001656	metanephros development	11/1229	94/18870	0.0417306	0.197582	0.160687	PDGFA/DLG5/HES1/WNT4/SPRY1/GPC3/GDNF/BMP4/SOX9/WNT9B/FMN1	11	Basal-cell
GO:0051646	mitochondrion localization	7/1229	50/18870	0.0420888	0.198765	0.161649	MEF2A/MARK1/MAP1B/HIF1A/SYBU/RHOT1/MAPT	7	Basal-cell
GO:0061082	myeloid leukocyte cytokine production	7/1229	50/18870	0.0420888	0.198765	0.161649	TGFB1/SPON2/PRG2/KIT/CD36/PANX1/CARD9	7	Basal-cell
GO:0071320	cellular response to cAMP	7/1229	50/18870	0.0420888	0.198765	0.161649	ASS1/RAPGEF1/PTAFR/DMTN/SLC26A6/AHR/PIK3CG	7	Basal-cell
GO:0010894	negative regulation of steroid biosynthetic process	5/1229	30/18870	0.042546	0.200065	0.162706	DKK3/SNAI2/APOE/WNT4/BMP2	5	Basal-cell
GO:0060045	positive regulation of cardiac muscle cell proliferation	5/1229	30/18870	0.042546	0.200065	0.162706	FGFR2/MEF2C/BMPR1A/CDK1/ZFPM2	5	Basal-cell
GO:0060142	regulation of syncytium formation by plasma membrane fusion	5/1229	30/18870	0.042546	0.200065	0.162706	EHD2/TREM2/CD53/NFATC2/TYROBP	5	Basal-cell
GO:0065005	protein-lipid complex assembly	5/1229	30/18870	0.042546	0.200065	0.162706	LCAT/APOE/ABCA1/LPCAT3/BIN1	5	Basal-cell
GO:0071295	cellular response to vitamin	5/1229	30/18870	0.042546	0.200065	0.162706	POSTN/SNAI2/TNC/VDR/GAS6	5	Basal-cell
GO:0070665	positive regulation of leukocyte proliferation	17/1229	166/18870	0.0428311	0.201233	0.163656	WNT3A/SLC7A1/HES1/EFNB1/PPP3CA/CD276/IL34/KITLG/CDKN1A/PTPRC/MEF2C/KIT/HLA-DPA1/HLA-DPB1/NFATC2/SPN/HAVCR2	17	Basal-cell
GO:0006641	triglyceride metabolic process	12/1229	106/18870	0.0428686	0.201237	0.163659	GPX1/APOE/SLC27A1/SORL1/ACSL1/LPL/APOBR/PNPLA1/SLC27A5/PIK3CG/AGPAT2/SERPINA12	12	Basal-cell
GO:0035337	fatty-acyl-CoA metabolic process	6/1229	40/18870	0.0433264	0.202159	0.164409	ACSL4/THEM5/ACSL1/ACOT7/HACD2/ELOVL6	6	Basal-cell
GO:0048753	pigment granule organization	6/1229	40/18870	0.0433264	0.202159	0.164409	APOE/ZEB2/PMEL/GPR143/TYRP1/KIF13A	6	Basal-cell
GO:0060421	positive regulation of heart growth	6/1229	40/18870	0.0433264	0.202159	0.164409	FGFR2/EDN1/MEF2C/BMPR1A/CDK1/ZFPM2	6	Basal-cell
GO:0070884	regulation of calcineurin-NFAT signaling cascade	6/1229	40/18870	0.0433264	0.202159	0.164409	PRNP/FHL2/CHP2/PPP3CA/ERBB3/CHP1	6	Basal-cell
GO:0010921	regulation of phosphatase activity	8/1229	61/18870	0.0433944	0.202159	0.164409	CHP2/BMP2/PTPRC/MEF2C/CRY2/LGALS3/CALM3/CHP1	8	Basal-cell
GO:0045599	negative regulation of fat cell differentiation	8/1229	61/18870	0.0433944	0.202159	0.164409	ZFP36L2/WNT3A/SMAD3/TGFB1/BMP2/SORT1/LRP3/ZFPM2	8	Basal-cell
GO:0046456	icosanoid biosynthetic process	8/1229	61/18870	0.0433944	0.202159	0.164409	PTGS1/CBR1/EDN1/EDN2/GGT6/FADS1/FABP5/ALOX5AP	8	Basal-cell
GO:0030032	lamellipodium assembly	9/1229	72/18870	0.0435063	0.202159	0.164409	CDH13/ITGB1/AJUBA/AUTS2/VAV2/KIT/DMTN/ARHGEF6/SRGAP2	9	Basal-cell
GO:0043954	cellular component maintenance	9/1229	72/18870	0.0435063	0.202159	0.164409	ITGA3/PRNP/APOE/TREM2/SORT1/TJP1/CLDN1/PLEKHA7/FYN	9	Basal-cell
GO:0050766	positive regulation of phagocytosis	9/1229	72/18870	0.0435063	0.202159	0.164409	ITGA2/CCL2/IL2RB/GAS6/RAB31/PTPRC/TREM2/RAB27A/CD36	9	Basal-cell
GO:0060411	cardiac septum morphogenesis	9/1229	72/18870	0.0435063	0.202159	0.164409	FGFR2/HES1/BMP4/DNAH11/NOTCH2/HEY1/LRP2/BMPR1A/ZFPM2	9	Basal-cell
GO:0071260	cellular response to mechanical stimulus	9/1229	72/18870	0.0435063	0.202159	0.164409	ITGA2/SLC2A1/KCNJ2/IRF1/CNN2/TNFRSF10B/IL33/SCX/SOX9	9	Basal-cell
GO:0007093	mitotic cell cycle checkpoint signaling	15/1229	142/18870	0.0436464	0.202639	0.164799	RBBP8/XPC/CDKN1A/TTK/CCND1/CDC20/SPC25/NUF2/NDC80/CDCA8/SPC24/BLM/BUB1B/CDK1/BRCA1	15	Basal-cell
GO:0048670	regulation of collateral sprouting	4/1229	21/18870	0.0440607	0.203873	0.165803	WNT3/WNT3A/RGMA/CRABP2	4	Basal-cell
GO:0051315	attachment of mitotic spindle microtubules to kinetochore	4/1229	21/18870	0.0440607	0.203873	0.165803	NUF2/NDC80/CDCA8/KAT2B	4	Basal-cell
GO:0060973	cell migration involved in heart development	4/1229	21/18870	0.0440607	0.203873	0.165803	SNAI2/EDN1/EDNRA/BMP4	4	Basal-cell
GO:0071498	cellular response to fluid shear stress	4/1229	21/18870	0.0440607	0.203873	0.165803	ASS1/MEF2C/MMP2/SREBF2	4	Basal-cell
GO:0034599	cellular response to oxidative stress	24/1229	255/18870	0.0446522	0.206263	0.167747	GPX1/ALDH3B1/PLEKHA1/MET/EDN1/ETV5/PTPRK/EPAS1/EDNRA/WNT16/NET1/CPEB2/HIF1A/GPX8/PLA2R1/SOD3/MMP2/KAT2B/MYB/CD36/CDK1/NCOA7/MAPT/FYN	24	Basal-cell
GO:0051259	protein complex oligomerization	24/1229	255/18870	0.0446522	0.206263	0.167747	TP63/KRT1/PRNP/KRT10/TP73/KCNJ2/UGDH/GSDMD/SLC1A5/SIGMAR1/KCNS1/LRRC8D/RRM2/EVL/KCTD10/CLDN1/SLC1A2/BLM/KIF25/CARD9/COL1A2/ALOX5AP/TRPM1/GNMT	24	Basal-cell
GO:0031345	negative regulation of cell projection organization	19/1229	192/18870	0.0452771	0.208974	0.169952	ITGA3/WNT3/FLNA/PRNP/WNT3A/APOE/TSKU/HES1/PPP3CA/NGEF/LIMK2/RGMA/PMP22/RTN4RL2/VIM/RUFY3/EVL/ARHGAP4/FYN	19	Basal-cell
GO:0051961	negative regulation of nervous system development	16/1229	155/18870	0.0455262	0.209894	0.170699	WNT3/ASCL2/WNT3A/WNT7A/HES1/PPP3CA/RGMA/NR1D1/TMEM98/RUFY3/SORL1/TREM2/SOX10/BRINP1/ARHGAP4/BMPR1A	16	Basal-cell
GO:0009743	response to carbohydrate	22/1229	230/18870	0.0455909	0.209894	0.170699	ITGA2/GPX1/SLC39A14/GLUL/TXNIP/SERPINF1/PPP3CA/SLC2A5/GAS6/ANO1/NR1D1/THBS1/LRP5/MAP1B/SLC6A1/HIF1A/TREM2/RAB11FIP5/LPL/SLC26A6/SYBU/PRKCB	22	Basal-cell
GO:0051403	stress-activated MAPK cascade	22/1229	230/18870	0.0455909	0.209894	0.170699	CCM2/SMAD3/WNT7A/APP/MAPKBP1/SDCBP/BMP2/TRAF4/WNT16/BMP4/TREM2/DUSP9/IGFBP6/PBK/MAP4K1/GRIK2/BIRC7/ARHGEF6/FOXM1/GADD45B/CARD9/MARVELD3	22	Basal-cell
GO:0060395	SMAD protein signal transduction	10/1229	84/18870	0.0459355	0.211303	0.171846	MIR205/SMAD3/TGFB1/BMP2/VIM/BMP4/VEPH1/PMEPA1/BMPR1A/NCEH1	10	Basal-cell
GO:0031644	regulation of nervous system process	13/1229	119/18870	0.0460457	0.211633	0.172114	ITGA2/WNT7A/APP/GRIN2A/TMEM98/TENM4/SOX10/TNFRSF21/FABP5/NLGN4X/DLGAP1/GRIK2/TMEM108	13	Basal-cell
GO:0051496	positive regulation of stress fiber assembly	7/1229	51/18870	0.0461559	0.211849	0.172289	SMAD3/WNT4/ARHGEF10/ARHGEF5/EVL/BAG4/ARHGEF10L	7	Basal-cell
GO:0022408	negative regulation of cell-cell adhesion	20/1229	205/18870	0.0461697	0.211849	0.172289	ASS1/PRNP/ASCL2/DLG5/LGALS9B/TGFB1/IRF1/CBLB/IL20RB/RUNX3/LGALS9C/BMP2/NRARP/BMP4/TNFRSF21/LGALS3/TNFAIP8L2/PAG1/SPN/HAVCR2	20	Basal-cell
GO:0048562	embryonic organ morphogenesis	27/1229	295/18870	0.0467268	0.21422	0.174218	EFEMP1/DLL1/FGFR2/WNT3A/SMAD3/HES1/PTK7/EDN1/HOXA7/GRHL3/HOXA9/IFT172/EDNRA/HOXB2/WNT16/ALX1/HIF1A/SLITRK6/BMP4/FZD6/MEF2C/TMIE/NOTCH2/HOXB4/SOX9/WNT9B/STRC	27	Basal-cell
GO:0030330	DNA damage response, signal transduction by p53 class mediator	9/1229	73/18870	0.0468814	0.21422	0.174218	SNAI2/SPRED2/PMAIP1/SPRED1/CDKN1A/PLA2R1/FOXM1/BATF/DYRK3	9	Basal-cell
GO:0045661	regulation of myoblast differentiation	9/1229	73/18870	0.0468814	0.21422	0.174218	DLL1/TGFB1/SMARCD3/IGFBP3/BMP4/MEF2C/SOSTDC1/CAPN3/SOX9	9	Basal-cell
GO:0045665	negative regulation of neuron differentiation	9/1229	73/18870	0.0468814	0.21422	0.174218	DLL1/ITGB1/NOTCH3/TP73/WNT3A/APP/HES1/HEY1/SOX9	9	Basal-cell
GO:1904377	positive regulation of protein localization to cell periphery	9/1229	73/18870	0.0468814	0.21422	0.174218	ITGA3/ITGB1/PRNP/WNT3A/GPSM2/PIAS1/TREM2/LGALS3/EFCAB7	9	Basal-cell
GO:1901653	cellular response to peptide	33/1229	374/18870	0.0470496	0.21451	0.174454	ASS1/PRNP/PKM/CAV2/SLC39A14/VWA2/APP/ADIPOR1/PPP3CA/EDN1/SLC27A1/ANO1/ATP2B1/VIM/NGFR/EDNRA/SCNN1A/MAP1B/SORL1/CPEB2/RAB31/TREM2/GHR/SLC27A4/SHC1/KAT2B/PTPN1/CD36/PRKCB/SERPINA12/RANGAP1/SOCS2/FYN	33	Basal-cell
GO:1990845	adaptive thermogenesis	17/1229	168/18870	0.0470779	0.21451	0.174454	PDGFC/ADIPOR1/EPAS1/NR1D1/SCD/GATM/CKB/SORL1/ACSL1/S100B/TRPV2/FABP5/LAMA4/CD36/ADAMTS5/ELOVL6/ESRRG	17	Basal-cell
GO:0032731	positive regulation of interleukin-1 beta production	8/1229	62/18870	0.0471008	0.21451	0.174454	SMAD3/APP/GSDMD/TRIM16/LPL/CD36/PANX1/TYROBP	8	Basal-cell
GO:0090303	positive regulation of wound healing	8/1229	62/18870	0.0471008	0.21451	0.174454	SMOC2/ITGB1/FERMT1/THBS1/CLDN1/DMTN/CD36/CLDN4	8	Basal-cell
GO:0009755	hormone-mediated signaling pathway	19/1229	193/18870	0.0472904	0.214677	0.17459	TP63/NCOR2/UCN2/ADIPOR1/SLC27A1/NR1D1/CALCOCO1/RXRG/ACSL1/CRY2/GHR/PMEPA1/TRERF1/OR51E2/ESRRG/PADI2/PAQR8/VPS18/BRCA1	19	Basal-cell
GO:0033673	negative regulation of kinase activity	19/1229	193/18870	0.0472904	0.214677	0.17459	APOE/SPRY1/CBLB/GNAQ/BMP2/PKIB/SPRED1/LRP5/ERRFI1/PIK3IP1/SORL1/CDKN1A/PTPRC/PTPN1/CHP1/HHEX/MAPT/MIR711/DEPTOR	19	Basal-cell
GO:0042982	amyloid precursor protein metabolic process	11/1229	96/18870	0.0474734	0.214677	0.17459	PRNP/NSG1/APOE/NTRK2/IFNGR1/PSEN2/DHCR24/SORL1/BIN1/NECAB1/RTN1	11	Basal-cell
GO:0046718	viral entry into host cell	16/1229	156/18870	0.0477991	0.214677	0.17459	IFITM3/ITGB1/ITGA2/LY6E/IFITM1/CAV2/SLC7A1/SLC20A2/GAS6/SLC1A5/IFITM2/LGALS1/CLDN1/GSN/CDK1/VPS18	16	Basal-cell
GO:0003203	endocardial cushion morphogenesis	6/1229	41/18870	0.0480702	0.214677	0.17459	SNAI2/BMP2/HEY1/BMPR1A/ADAMTS5/SOX9	6	Basal-cell
[truncated: 2,314 more rows]

## Sheet: Table S7.3
Table S7.3 GO enrichment analysis of RNA marker genes in basal-proliferative cells.
[truncated: 3,111 more rows]

## Sheet: Tabls S7.4
Table S7.4 GO enrichment analysis of RNA marker genes in spinous keratinocytes.
[truncated: 4,733 more rows]

[truncated: 8 more sheets: Table S7.5, Table S7.6, Table S7.7, Table S7.8, Table S7.9, Table S7.10, Table S7.11, Table S7.12]
